# Supplementary material for: Genetic variation in the glymphatic pathway predicts cognition and neurodegeneration in preclinical Alzheimer’s disease
Source: Research Square preprint supplement (doi:10.21203/rs.3.rs-9444687/v1), 2026-05-06
Supplement: Supplementary file 1 [file 9b25a42a10693338252e98bb.xlsx]

## Sheet: Table S1
	Supplementary Table 1A: Participants with Aβ data available
		ADNI	AIBL	p
	n	404	569
	Age mean(sd)	74 (6.7)	72.9 (6.6)	0.01
	Sex			0.57
	Male	177(43.8%)	261(45.9%)
	Female	227(56.2%)	308(54.1%)
	APOE-e4			0.97
	ε4-	247(61.1%)	346(60.8%)
	ε4+	157(38.9%)	223(39.2%)
	Centiloid mean(sd)	29.4 (35.8)	33.5 (38.9)	0.09
	Supplementary Table 1B: Participants with hippocampal volume data available
		ADNI	AIBL	p
	n	328	518
	Age mean(sd)	73.8 (6.6)	72.8 (6.4)	0.044
	Sex			0.43
	Male	137(41.8%)	232(44.8%)
	Female	191(58.2%)	286(55.2%)
	APOE-e4			0.75
	ε4-	202(61.6%)	312(60.2%)
	ε4+	126(38.4%)	206(39.8%)
	Supplementary Table 1C: Participants with PACC data available
		ADNI	AIBL	p
	n	402	562
	Age mean(sd)	73.1 (6.1)	71.3 (6.3)	< 0.01
	Sex			0.65
	Male	177(44%)	257(45.7%)
	Female	225(56%)	305(54.3%)
	APOE-e4			0.99
	ε4-	245(60.9%)	344(61.2%)
	ε4+	157(39.1%)	218(38.8%)
	Education			< 2.2e-16
	0-8	2(0.5%)	38(6.8%)
	9-12	32(8%)	206(36.7%)
	13-15	69(17.2%)	117(20.8%)
	15+	299(74.4%)	201(35.8%)
	Supplementary Table 1D: Participants with longitudinal Aβ data available
		ADNI	AIBL	p
	n	346	434
	Age mean(sd)	73.8 (6.5)	70.6 (6.8)	< 0.01
	Sex			0.69
	Male	152(43.9%)	198(45.6%)
	Female	194(56.1%)	236(54.4%)
	APOE-e4			0.3
	ε4-	214(61.8%)	285(65.7%)
	ε4+	132(38.2%)	149(34.3%)
	Centiloid Accumulation mean(sd)	3.3 (2.5)	3 (2.8)	0.19
	Supplementary Table 1E: Participants with longitudinal hippocampal volume data available
		ADNI	AIBL	p
	n	169	140
	Age mean(sd)	73.5 (6.1)	69.9 (6.5)	1.063e-06
	Sex			0.29
	Male	72(42.6%)	69(49.3%)
	Female	97(57.4%)	71(50.7%)
	APOE-e4			0.33
	ε4-	114(67.5%)	86(61.4%)
	ε4+	55(32.5%)	54(38.6%)
	Supplementary Table 1F: Participants with longitudinal PACC data available
		ADNI	AIBL	p
	n	265	425
	Age mean(sd)	73.9 (5.7)	70.8 (6.4)	1.3e-10
	Sex			0.96
	Male	121(45.7%)	192(45.2%)
	Female	144(54.3%)	233(54.8%)
	APOE-e4			0.58
	ε4-	167(63%)	278(65.4%)
	ε4+	98(37%)	147(34.6%)
	Education			< 2.2e-16
	0-8	2(0.8%)	30(7.1%)
	9-12	24(9.1%)	154(36.2%)
	13-15	48(18.1%)	80(18.8%)
	15+	191(72.1%)	161(37.9%)

## Sheet: Table S2 
Supplementary Table 2: Meta-Analysis of linear regression results in Aβ+ participants (additive genetic model)
	Outcome	Model	SNP	CHROM	POS	Gene_Symbol	Allele1	Allele2	Weight	Zscore	Direction	P	FDR_P
	Centiloid	Cross-Sectional	rs111599092	3	49465346	DAG1	a	g	973	-0.971	--	0.3315	0.783026
	Centiloid	Cross-Sectional	rs73073015	3	49465733	DAG1	a	g	973	0.644	-+	0.5195	0.80419
	Centiloid	Cross-Sectional	rs7611164	3	49471395	DAG1	t	g	973	-0.371	-+	0.7108	0.859321
	Centiloid	Cross-Sectional	rs1568661	3	49483525	DAG1	a	g	973	1.251	++	0.211	0.771933
	Centiloid	Cross-Sectional	rs7374731	3	49495661	DAG1	c	g	973	0.805	++	0.4207	0.784736
	Centiloid	Cross-Sectional	rs73074811	3	49516098	DAG1	a	t	973	-0.761	-+	0.4466	0.7946
	Centiloid	Cross-Sectional	rs3870338	3	49519618	DAG1	a	g	973	1.286	++	0.1983	0.771933
	Centiloid	Cross-Sectional	rs55935606	3	49528072	DAG1	a	g	973	-0.738	--	0.4603	0.80419
	Centiloid	Cross-Sectional	rs75153130	3	49530436	DAG1	a	c	973	0.371	+-	0.7108	0.859321
	Centiloid	Cross-Sectional	rs13079082	3	49537375	DAG1	c	g	973	-0.583	+-	0.5601	0.818086
	Centiloid	Cross-Sectional	rs4052546	3	49538116	DAG1	c	g	973	-0.805	--	0.4207	0.784736
	Centiloid	Cross-Sectional	rs73074830	3	49539584	DAG1	a	c	973	1.048	++	0.2946	0.771933
	Centiloid	Cross-Sectional	rs114093899	3	49539955	DAG1	c	g	973	-0.348	+-	0.7276	0.859321
	Centiloid	Cross-Sectional	rs9789109	18	26842291	AQP4	a	g	973	-1.397	+-	0.1624	0.771933
	Centiloid	Cross-Sectional	rs10164026	18	26842362	AQP4	a	c	973	-0.989	+-	0.3226	0.775372
	Centiloid	Cross-Sectional	rs4800270	18	26844933	AQP4	t	g	973	1.079	-+	0.2806	0.771933
	Centiloid	Cross-Sectional	rs79668602	18	26845488	AQP4	a	g	973	0.832	++	0.4053	0.784736
	Centiloid	Cross-Sectional	rs12458416	18	26847267	AQP4	c	g	973	-2.137	--	0.03261	0.771933
	Centiloid	Cross-Sectional	rs12953446	18	26848521	AQP4	a	g	973	0.691	-+	0.4895	0.80419
	Centiloid	Cross-Sectional	rs67461489	18	26848876	AQP4	t	c	973	-0.168	+-	0.8668	0.913474
	Centiloid	Cross-Sectional	rs11661081	18	26850068	AQP4	a	c	973	-1.023	--	0.3062	0.771933
	Centiloid	Cross-Sectional	rs3763043	18	26855854	AQP4	t	c	973	1.92	++	0.05484	0.771933
	Centiloid	Cross-Sectional	rs68006382	18	26856555	AQP4	a	g	973	-0.45	--	0.6525	0.835444
	Centiloid	Cross-Sectional	rs335930	18	26856961	AQP4	a	c	973	1.025	++	0.3056	0.771933
	Centiloid	Cross-Sectional	rs71353405	18	26857429	AQP4	t	c	973	0.797	-+	0.4255	0.784736
	Centiloid	Cross-Sectional	rs162009	18	26864250	AQP4	a	g	973	-0.42	-+	0.6748	0.840433
	Centiloid	Cross-Sectional	rs4800773	18	26865017	AQP4	a	g	973	0.712	-+	0.4763	0.80419
	Centiloid	Cross-Sectional	rs3875089	18	26865469	AQP4	t	c	973	-0.138	+-	0.8906	0.924335
	Centiloid	Cross-Sectional	rs72878787	18	26866517	AQP4	a	g	973	0.43	-+	0.667	0.838339
	Centiloid	Cross-Sectional	rs162006	18	26866570	AQP4	t	c	973	-0.315	-+	0.7524	0.862776
	Centiloid	Cross-Sectional	rs151244	18	26866755	AQP4	t	c	973	1.136	+-	0.2561	0.771933
	Centiloid	Cross-Sectional	rs72878794	18	26866839	AQP4	t	c	973	0.482	+-	0.6301	0.834514
	Centiloid	Cross-Sectional	rs9961118	18	26866901	AQP4	t	c	973	1.332	++	0.183	0.771933
	Centiloid	Cross-Sectional	rs162004	18	26867972	AQP4	c	g	973	1.589	++	0.112	0.771933
	Centiloid	Cross-Sectional	rs72878799	18	26868165	AQP4	a	g	973	-0.27	-+	0.787	0.862776
	Centiloid	Cross-Sectional	rs11662318	18	26869056	AQP4	t	c	973	1.379	-+	0.1679	0.771933
	Centiloid	Cross-Sectional	rs151246	18	26869139	AQP4	t	g	973	0.79	++	0.4296	0.784736
	Centiloid	Cross-Sectional	rs491148	18	26869803	AQP4	a	g	973	-1.057	+-	0.2905	0.771933
	Centiloid	Cross-Sectional	rs162002	18	26871015	AQP4	a	g	973	0.142	+-	0.8873	0.924335
	Centiloid	Cross-Sectional	rs162001	18	26871481	AQP4	a	c	973	-2.383	--	0.01718	0.771933
	Centiloid	Cross-Sectional	rs3865411	18	26871684	AQP4	a	g	973	-0.636	+-	0.525	0.80419
	Centiloid	Cross-Sectional	rs162000	18	26872471	AQP4	a	c	973	-1.356	+-	0.1752	0.771933
	Centiloid	Cross-Sectional	rs12969503	18	26873564	AQP4	t	g	973	0.869	++	0.3848	0.784736
	Centiloid	Cross-Sectional	rs8094228	18	26873767	AQP4	t	c	973	-1.218	--	0.2233	0.771933
	Centiloid	Cross-Sectional	rs480647	18	26874290	AQP4	t	c	973	-0.433	+-	0.6647	0.838339
	Centiloid	Cross-Sectional	rs10502478	18	26874616	AQP4	a	c	973	-3.097	--	0.001958	0.268246
	Centiloid	Cross-Sectional	rs7234562	18	34483685	DTNA	t	c	973	-0.361	+-	0.718	0.859321
	Centiloid	Cross-Sectional	rs79922046	18	34485536	DTNA	a	g	973	-0.808	+-	0.4191	0.784736
	Centiloid	Cross-Sectional	rs9955950	18	34485672	DTNA	t	c	973	0.521	+-	0.6022	0.825014
	Centiloid	Cross-Sectional	rs12957028	18	34485948	DTNA	a	g	973	0.992	-+	0.3211	0.775372
	Centiloid	Cross-Sectional	rs72639491	18	34491438	DTNA	a	g	973	0.334	-+	0.7385	0.862776
	Centiloid	Cross-Sectional	rs62097347	18	34492032	DTNA	c	g	973	0.849	++	0.396	0.784736
	Centiloid	Cross-Sectional	rs9961251	18	34492344	DTNA	t	c	973	-1.05	--	0.2937	0.771933
	Centiloid	Cross-Sectional	rs111846993	18	34494001	DTNA	t	c	973	-0.546	--	0.5852	0.818086
	Centiloid	Cross-Sectional	rs4799769	18	34494577	DTNA	c	g	973	-1.015	--	0.3099	0.771933
	Centiloid	Cross-Sectional	rs8092794	18	34496273	DTNA	a	g	973	1.413	-+	0.1576	0.771933
	Centiloid	Cross-Sectional	rs7243528	18	34497055	DTNA	t	c	973	-1.284	+-	0.1991	0.771933
	Centiloid	Cross-Sectional	rs79972565	18	34497194	DTNA	t	g	973	-1.068	+-	0.2855	0.771933
	Centiloid	Cross-Sectional	rs35839923	18	34497764	DTNA	a	g	973	0.098	-+	0.9222	0.942846
	Centiloid	Cross-Sectional	rs62097349	18	34499519	DTNA	a	g	973	-1.778	--	0.07543	0.771933
	Centiloid	Cross-Sectional	rs9965622	18	34502153	DTNA	t	c	973	1.037	-+	0.2998	0.771933
	Centiloid	Cross-Sectional	rs62098462	18	34504364	DTNA	t	c	973	-1.891	--	0.05867	0.771933
	Centiloid	Cross-Sectional	rs75127284	18	34506592	DTNA	a	c	973	0.891	++	0.3727	0.784736
	Centiloid	Cross-Sectional	rs2439861	18	34507940	DTNA	a	g	973	-0.672	+-	0.5014	0.80419
	Centiloid	Cross-Sectional	rs35982920	18	34516411	DTNA	a	g	973	-0.191	+-	0.8485	0.90816
	Centiloid	Cross-Sectional	rs2509597	18	34528430	DTNA	a	t	973	1.086	++	0.2775	0.771933
	Centiloid	Cross-Sectional	rs71363449	18	34531997	DTNA	t	c	973	-0.255	+-	0.799	0.862776
	Centiloid	Cross-Sectional	rs2439853	18	34533937	DTNA	a	g	973	0.457	++	0.6478	0.835444
	Centiloid	Cross-Sectional	rs2439000	18	34536414	DTNA	c	g	973	-0.705	+-	0.4807	0.80419
	Centiloid	Cross-Sectional	rs11875892	18	34544032	DTNA	a	g	973	0.873	+-	0.3829	0.784736
	Centiloid	Cross-Sectional	rs1967583	18	34544573	DTNA	t	c	973	0.828	++	0.4075	0.784736
	Centiloid	Cross-Sectional	rs28856895	18	34555507	DTNA	a	g	973	0.55	+-	0.5821	0.818086
	Centiloid	Cross-Sectional	rs77973497	18	34560529	DTNA	a	c	973	-1.201	-+	0.2299	0.771933
	Centiloid	Cross-Sectional	rs2579796	18	34569243	DTNA	a	g	973	0.477	++	0.6335	0.834514
	Centiloid	Cross-Sectional	rs2579797	18	34571732	DTNA	t	g	973	0.631	-+	0.5283	0.80419
	Centiloid	Cross-Sectional	rs2685557	18	34576782	DTNA	t	c	973	0.493	++	0.6222	0.834514
	Centiloid	Cross-Sectional	rs9958492	18	34577783	DTNA	t	c	973	0.021	+-	0.9834	0.9834
	Centiloid	Cross-Sectional	rs2579802	18	34579787	DTNA	a	c	973	-0.258	-+	0.7965	0.862776
	Centiloid	Cross-Sectional	rs74920018	18	34607557	DTNA	a	t	973	-1.711	-+	0.08704	0.771933
	Centiloid	Cross-Sectional	rs1439127	18	34607759	DTNA	a	t	973	0.555	+-	0.5787	0.818086
	Centiloid	Cross-Sectional	rs12327368	18	34611361	DTNA	a	g	973	0.171	+-	0.864	0.913474
	Centiloid	Cross-Sectional	rs62097188	18	34611412	DTNA	a	g	973	-1.433	--	0.1519	0.771933
	Centiloid	Cross-Sectional	rs9807153	18	34635520	DTNA	a	t	973	1.448	++	0.1475	0.771933
	Centiloid	Cross-Sectional	rs2730126	18	34635939	DTNA	a	c	973	0.645	++	0.519	0.80419
	Centiloid	Cross-Sectional	rs1659526	18	34644451	DTNA	a	g	973	0.352	++	0.7247	0.859321
	Centiloid	Cross-Sectional	rs17642885	18	34649976	DTNA	t	c	973	-0.291	-+	0.7707	0.862776
	Centiloid	Cross-Sectional	rs1240974	18	34650949	DTNA	t	c	973	0.378	-+	0.7055	0.859321
	Centiloid	Cross-Sectional	rs55869511	18	34651262	DTNA	a	c	973	-0.577	--	0.5636	0.818086
	Centiloid	Cross-Sectional	rs12955208	18	34656737	DTNA	a	g	973	-0.906	-+	0.3652	0.784736
	Centiloid	Cross-Sectional	rs72953203	18	34660068	DTNA	a	g	973	-0.844	--	0.3986	0.784736
	Centiloid	Cross-Sectional	rs9946070	18	34665505	DTNA	a	g	973	0.775	++	0.4381	0.789733
	Centiloid	Cross-Sectional	rs72953211	18	34673381	DTNA	a	c	973	-0.254	--	0.7998	0.862776
	Centiloid	Cross-Sectional	rs55971592	18	34697328	DTNA	a	g	973	1.441	++	0.1496	0.771933
	Centiloid	Cross-Sectional	rs78837792	18	34703359	DTNA	t	c	973	0.678	++	0.498	0.80419
	Centiloid	Cross-Sectional	rs11663468	18	34707936	DTNA	t	c	973	-1.119	--	0.2631	0.771933
	Centiloid	Cross-Sectional	rs12963825	18	34709484	DTNA	a	g	973	1.147	-+	0.2516	0.771933
	Centiloid	Cross-Sectional	rs1480432	18	34727166	DTNA	t	g	973	-1.253	-+	0.2103	0.771933
	Centiloid	Cross-Sectional	rs45556134	18	34729425	DTNA	a	g	973	-1.229	--	0.2191	0.771933
	Centiloid	Cross-Sectional	rs899828	18	34732688	DTNA	t	g	973	1.391	++	0.1641	0.771933
	Centiloid	Cross-Sectional	rs17556884	18	34736455	DTNA	t	c	973	-0.847	--	0.3973	0.784736
	Centiloid	Cross-Sectional	rs1480428	18	34738732	DTNA	a	g	973	0.105	++	0.9163	0.942846
	Centiloid	Cross-Sectional	rs12957349	18	34739291	DTNA	t	c	973	-1.517	-+	0.1292	0.771933
	Centiloid	Cross-Sectional	rs12608110	18	34752198	DTNA	a	g	973	2.044	++	0.04091	0.771933
	Centiloid	Cross-Sectional	rs7228547	18	34760039	DTNA	a	g	973	1.292	++	0.1963	0.771933
	Centiloid	Cross-Sectional	rs8099437	18	34761448	DTNA	t	g	973	0.277	++	0.7817	0.862776
	Centiloid	Cross-Sectional	rs72955132	18	34762382	DTNA	a	g	973	-0.959	--	0.3375	0.783686
	Centiloid	Cross-Sectional	rs1817452	18	34776629	DTNA	t	c	973	-1.337	-+	0.1811	0.771933
	Centiloid	Cross-Sectional	rs56404226	18	34778060	DTNA	a	g	973	-1.378	--	0.1683	0.771933
	Centiloid	Cross-Sectional	rs72955175	18	34779045	DTNA	a	t	973	0.866	++	0.3863	0.784736
	Centiloid	Cross-Sectional	rs12608251	18	34782906	DTNA	t	g	973	-1.911	--	0.05601	0.771933
	Centiloid	Cross-Sectional	rs76880720	18	34791141	DTNA	a	c	973	1.364	+-	0.1726	0.771933
	Centiloid	Cross-Sectional	rs9989533	18	34793909	DTNA	t	c	973	1.278	++	0.2011	0.771933
	Centiloid	Cross-Sectional	rs79500711	18	34794379	DTNA	a	g	973	0.612	++	0.5407	0.805173
	Centiloid	Cross-Sectional	rs138856611	18	34801684	DTNA	t	g	973	-1.104	-+	0.2697	0.771933
	Centiloid	Cross-Sectional	rs62097226	18	34804223	DTNA	a	t	973	-0.268	--	0.7888	0.862776
	Centiloid	Cross-Sectional	rs4458079	18	34806161	DTNA	t	c	973	-0.304	--	0.7615	0.862776
	Centiloid	Cross-Sectional	rs8086358	18	34813672	DTNA	t	g	973	0.284	++	0.7764	0.862776
	Centiloid	Cross-Sectional	rs72963047	18	34818804	DTNA	a	c	973	0.664	-+	0.5068	0.80419
	Centiloid	Cross-Sectional	rs17557660	18	34831178	DTNA	a	t	973	0.883	-+	0.3773	0.784736
	Centiloid	Cross-Sectional	rs1790533	18	34831631	DTNA	a	g	973	-1.505	-+	0.1323	0.771933
	Centiloid	Cross-Sectional	rs4799782	18	34841123	DTNA	a	g	973	1.162	+-	0.245	0.771933
	Centiloid	Cross-Sectional	rs1786604	18	34846264	DTNA	a	g	973	0.536	++	0.5921	0.819371
	Centiloid	Cross-Sectional	rs7233779	18	34863262	DTNA	a	g	973	0.618	++	0.5366	0.805173
	Centiloid	Cross-Sectional	rs644982	18	34869793	DTNA	a	g	973	-0.457	--	0.6476	0.835444
	Centiloid	Cross-Sectional	rs11659517	18	34870978	DTNA	a	t	973	-1.065	-+	0.2869	0.771933
	Centiloid	Cross-Sectional	rs524969	18	34872102	DTNA	a	t	973	1.234	+-	0.2173	0.771933
	Centiloid	Cross-Sectional	rs637914	18	34876135	DTNA	a	t	973	0.512	+-	0.6084	0.825255
	Centiloid	Cross-Sectional	rs9304141	18	34879143	DTNA	t	c	973	0.711	++	0.4768	0.80419
	Centiloid	Cross-Sectional	rs2288085	18	34879740	DTNA	a	g	973	0.05	++	0.96	0.974222
	Centiloid	Cross-Sectional	rs17558116	18	34882719	DTNA	t	c	973	0.039	-+	0.9686	0.975722
	Centiloid	Cross-Sectional	rs10502637	18	34890006	DTNA	t	c	973	1.216	++	0.224	0.771933
	Centiloid	Cross-Sectional	rs149163416	18	34898841	DTNA	a	g	973	-0.556	+-	0.5782	0.818086
	Centiloid	Cross-Sectional	20:33413780	20	33413780	SNTA1	a	t	973	-0.634	--	0.5258	0.80419
	Centiloid	Cross-Sectional	rs291683	20	33431611	SNTA1	t	c	973	-1.758	--	0.07881	0.771933
	Centiloid	Cross-Sectional	20:33433270	20	33433270	SNTA1	t	c	973	1.348	++	0.1776	0.771933
	Centiloid	Cross-Sectional	rs6141396	20	33436147	SNTA1	a	c	404	1.746	+?	0.08075	0.771933
	Centiloid	Cross-Sectional	rs293721	20	33441633	SNTA1	t	c	973	-1.233	-+	0.2176	0.771933
	Centiloid	Longitudinal	rs111599092	3	49465346	DAG1	a	g	780	-0.578	-+	0.5636	0.977382
	Centiloid	Longitudinal	rs73073015	3	49465733	DAG1	a	g	780	-0.365	+-	0.7151	0.981945
	Centiloid	Longitudinal	rs7611164	3	49471395	DAG1	t	g	780	0.314	-+	0.7538	0.981945
	Centiloid	Longitudinal	rs1568661	3	49483525	DAG1	a	g	780	-0.199	-+	0.8426	0.981945
	Centiloid	Longitudinal	rs7374731	3	49495661	DAG1	c	g	780	-0.314	-+	0.7533	0.981945
	Centiloid	Longitudinal	rs73074811	3	49516098	DAG1	a	t	780	0.377	++	0.7058	0.981945
	Centiloid	Longitudinal	rs3870338	3	49519618	DAG1	a	g	780	-0.24	-+	0.8104	0.981945
	Centiloid	Longitudinal	rs55935606	3	49528072	DAG1	a	g	780	0.39	+-	0.6963	0.981945
	Centiloid	Longitudinal	rs75153130	3	49530436	DAG1	a	c	780	-0.314	+-	0.7538	0.981945
	Centiloid	Longitudinal	rs13079082	3	49537375	DAG1	c	g	780	-0.097	-+	0.9224	0.989456
	Centiloid	Longitudinal	rs4052546	3	49538116	DAG1	c	g	780	0.314	+-	0.7533	0.981945
	Centiloid	Longitudinal	rs73074830	3	49539584	DAG1	a	c	780	0.896	+-	0.3703	0.942763
	Centiloid	Longitudinal	rs114093899	3	49539955	DAG1	c	g	780	0.691	++	0.4893	0.960142
	Centiloid	Longitudinal	rs9789109	18	26842291	AQP4	a	g	780	0.123	-+	0.9023	0.988921
	Centiloid	Longitudinal	rs10164026	18	26842362	AQP4	a	c	780	1.9	++	0.05747	0.592525
	Centiloid	Longitudinal	rs4800270	18	26844933	AQP4	t	g	780	0.836	+-	0.4032	0.960142
	Centiloid	Longitudinal	rs79668602	18	26845488	AQP4	a	g	780	0.198	+-	0.8434	0.981945
	Centiloid	Longitudinal	rs12458416	18	26847267	AQP4	c	g	780	1.256	++	0.2093	0.882612
	Centiloid	Longitudinal	rs12953446	18	26848521	AQP4	a	g	780	-0.211	-+	0.8328	0.981945
	Centiloid	Longitudinal	rs67461489	18	26848876	AQP4	t	c	780	-0.955	--	0.3398	0.915792
	Centiloid	Longitudinal	rs11661081	18	26850068	AQP4	a	c	780	-0.793	--	0.4277	0.960142
	Centiloid	Longitudinal	rs3763043	18	26855854	AQP4	t	c	780	0.625	+-	0.5317	0.964796
	Centiloid	Longitudinal	rs68006382	18	26856555	AQP4	a	g	780	-1.261	-+	0.2071	0.882612
	Centiloid	Longitudinal	rs335930	18	26856961	AQP4	a	c	780	0.151	+-	0.8797	0.981945
	Centiloid	Longitudinal	rs71353405	18	26857429	AQP4	t	c	780	-0.013	-+	0.9894	0.996675
	Centiloid	Longitudinal	rs162009	18	26864250	AQP4	a	g	780	0.729	-+	0.4657	0.960142
	Centiloid	Longitudinal	rs4800773	18	26865017	AQP4	a	g	780	-0.46	--	0.6454	0.981945
	Centiloid	Longitudinal	rs3875089	18	26865469	AQP4	t	c	780	-0.771	--	0.4406	0.960142
	Centiloid	Longitudinal	rs72878787	18	26866517	AQP4	a	g	780	-0.272	+-	0.7857	0.981945
	Centiloid	Longitudinal	rs162006	18	26866570	AQP4	t	c	780	-0.437	--	0.6619	0.981945
	Centiloid	Longitudinal	rs151244	18	26866755	AQP4	t	c	780	1.14	++	0.2541	0.915792
	Centiloid	Longitudinal	rs72878794	18	26866839	AQP4	t	c	780	1.366	++	0.1721	0.873248
	Centiloid	Longitudinal	rs9961118	18	26866901	AQP4	t	c	780	0.505	-+	0.6133	0.981945
	Centiloid	Longitudinal	rs162004	18	26867972	AQP4	c	g	780	0.964	++	0.3351	0.915792
	Centiloid	Longitudinal	rs72878799	18	26868165	AQP4	a	g	780	-0.425	-+	0.6707	0.981945
	Centiloid	Longitudinal	rs11662318	18	26869056	AQP4	t	c	780	0.967	++	0.3338	0.915792
	Centiloid	Longitudinal	rs151246	18	26869139	AQP4	t	g	780	0.182	++	0.8555	0.981945
	Centiloid	Longitudinal	rs491148	18	26869803	AQP4	a	g	780	-0.992	--	0.321	0.915792
	Centiloid	Longitudinal	rs162002	18	26871015	AQP4	a	g	780	-0.405	+-	0.6858	0.981945
	Centiloid	Longitudinal	rs162001	18	26871481	AQP4	a	c	780	-0.667	-+	0.5046	0.960142
	Centiloid	Longitudinal	rs3865411	18	26871684	AQP4	a	g	780	-1.215	--	0.2244	0.901069
	Centiloid	Longitudinal	rs162000	18	26872471	AQP4	a	c	780	-1.37	--	0.1708	0.873248
	Centiloid	Longitudinal	rs12969503	18	26873564	AQP4	t	g	780	0.223	+-	0.8233	0.981945
	Centiloid	Longitudinal	rs8094228	18	26873767	AQP4	t	c	780	0.042	-+	0.9669	0.991779
	Centiloid	Longitudinal	rs480647	18	26874290	AQP4	t	c	780	-0.157	+-	0.8752	0.981945
	Centiloid	Longitudinal	rs10502478	18	26874616	AQP4	a	c	780	0.376	-+	0.7069	0.981945
	Centiloid	Longitudinal	rs7234562	18	34483685	DTNA	t	c	780	-0.511	-+	0.6094	0.981945
	Centiloid	Longitudinal	rs79922046	18	34485536	DTNA	a	g	780	-0.816	--	0.4144	0.960142
	Centiloid	Longitudinal	rs9955950	18	34485672	DTNA	t	c	780	-1.308	--	0.191	0.882612
	Centiloid	Longitudinal	rs12957028	18	34485948	DTNA	a	g	780	0.676	++	0.4988	0.960142
	Centiloid	Longitudinal	rs72639491	18	34491438	DTNA	a	g	780	0.037	-+	0.9705	0.991779
	Centiloid	Longitudinal	rs62097347	18	34492032	DTNA	c	g	780	-0.511	-+	0.6094	0.981945
	Centiloid	Longitudinal	rs9961251	18	34492344	DTNA	t	c	780	-0.149	-+	0.8816	0.981945
	Centiloid	Longitudinal	rs111846993	18	34494001	DTNA	t	c	780	1.878	++	0.06033	0.592525
	Centiloid	Longitudinal	rs4799769	18	34494577	DTNA	c	g	780	0.945	+-	0.3445	0.915792
	Centiloid	Longitudinal	rs8092794	18	34496273	DTNA	a	g	780	0.251	-+	0.8019	0.981945
	Centiloid	Longitudinal	rs7243528	18	34497055	DTNA	t	c	780	-1.11	+-	0.2669	0.915792
	Centiloid	Longitudinal	rs79972565	18	34497194	DTNA	t	g	780	-0.641	+-	0.5213	0.964796
	Centiloid	Longitudinal	rs35839923	18	34497764	DTNA	a	g	780	-0.893	+-	0.3716	0.942763
	Centiloid	Longitudinal	rs62097349	18	34499519	DTNA	a	g	780	-0.679	+-	0.497	0.960142
	Centiloid	Longitudinal	rs9965622	18	34502153	DTNA	t	c	780	-1.011	--	0.312	0.915792
	Centiloid	Longitudinal	rs62098462	18	34504364	DTNA	t	c	780	-0.839	--	0.4017	0.960142
	Centiloid	Longitudinal	rs75127284	18	34506592	DTNA	a	c	780	0.265	-+	0.7911	0.981945
	Centiloid	Longitudinal	rs2439861	18	34507940	DTNA	a	g	780	-0.976	+-	0.3291	0.915792
	Centiloid	Longitudinal	rs35982920	18	34516411	DTNA	a	g	780	1.246	++	0.2126	0.882612
	Centiloid	Longitudinal	rs2509597	18	34528430	DTNA	a	t	780	0.004	+-	0.997	0.997
	Centiloid	Longitudinal	rs71363449	18	34531997	DTNA	t	c	780	1.409	++	0.1588	0.873248
	Centiloid	Longitudinal	rs2439853	18	34533937	DTNA	a	g	780	1.5	++	0.1335	0.831341
	Centiloid	Longitudinal	rs2439000	18	34536414	DTNA	c	g	780	-0.737	+-	0.4612	0.960142
	Centiloid	Longitudinal	rs11875892	18	34544032	DTNA	a	g	780	0.083	-+	0.9337	0.989456
	Centiloid	Longitudinal	rs1967583	18	34544573	DTNA	t	c	780	0.172	-+	0.8632	0.981945
	Centiloid	Longitudinal	rs28856895	18	34555507	DTNA	a	g	780	1.004	+-	0.3154	0.915792
	Centiloid	Longitudinal	rs77973497	18	34560529	DTNA	a	c	780	-1.516	--	0.1294	0.831341
	Centiloid	Longitudinal	rs2579796	18	34569243	DTNA	a	g	780	1.299	++	0.194	0.882612
	Centiloid	Longitudinal	rs2579797	18	34571732	DTNA	t	g	780	0.686	-+	0.4929	0.960142
	Centiloid	Longitudinal	rs2685557	18	34576782	DTNA	t	c	780	1.313	++	0.1892	0.882612
	Centiloid	Longitudinal	rs9958492	18	34577783	DTNA	t	c	780	1.509	++	0.1312	0.831341
	Centiloid	Longitudinal	rs2579802	18	34579787	DTNA	a	c	780	0.606	-+	0.5448	0.964796
	Centiloid	Longitudinal	rs74920018	18	34607557	DTNA	a	t	780	-1.052	+-	0.2928	0.915792
	Centiloid	Longitudinal	rs1439127	18	34607759	DTNA	a	t	780	0.939	++	0.3476	0.915792
	Centiloid	Longitudinal	rs12327368	18	34611361	DTNA	a	g	780	1.509	++	0.1313	0.831341
	Centiloid	Longitudinal	rs62097188	18	34611412	DTNA	a	g	780	0.077	+-	0.9389	0.989456
	Centiloid	Longitudinal	rs9807153	18	34635520	DTNA	a	t	780	-0.8	--	0.4237	0.960142
	Centiloid	Longitudinal	rs2730126	18	34635939	DTNA	a	c	780	1.979	++	0.04778	0.592525
	Centiloid	Longitudinal	rs1659526	18	34644451	DTNA	a	g	780	1.2	++	0.2302	0.901069
	Centiloid	Longitudinal	rs17642885	18	34649976	DTNA	t	c	780	-0.182	+-	0.8558	0.981945
	Centiloid	Longitudinal	rs1240974	18	34650949	DTNA	t	c	780	0.374	-+	0.7081	0.981945
	Centiloid	Longitudinal	rs55869511	18	34651262	DTNA	a	c	780	-0.427	--	0.669	0.981945
	Centiloid	Longitudinal	rs12955208	18	34656737	DTNA	a	g	780	-0.212	-+	0.8317	0.981945
	Centiloid	Longitudinal	rs72953203	18	34660068	DTNA	a	g	780	-1.023	--	0.3062	0.915792
	Centiloid	Longitudinal	rs9946070	18	34665505	DTNA	a	g	780	2.173	++	0.02981	0.592525
	Centiloid	Longitudinal	rs72953211	18	34673381	DTNA	a	c	780	-2.283	--	0.02246	0.592525
	Centiloid	Longitudinal	rs55971592	18	34697328	DTNA	a	g	780	-0.028	-+	0.9773	0.991779
	Centiloid	Longitudinal	rs78837792	18	34703359	DTNA	t	c	780	0.744	-+	0.4571	0.960142
	Centiloid	Longitudinal	rs11663468	18	34707936	DTNA	t	c	780	2.368	++	0.01787	0.592525
	Centiloid	Longitudinal	rs12963825	18	34709484	DTNA	a	g	780	0.734	++	0.4628	0.960142
	Centiloid	Longitudinal	rs1480432	18	34727166	DTNA	t	g	780	1.529	++	0.1264	0.831341
	Centiloid	Longitudinal	rs45556134	18	34729425	DTNA	a	g	780	0.599	++	0.5493	0.964796
	Centiloid	Longitudinal	rs899828	18	34732688	DTNA	t	g	780	-1.409	--	0.1588	0.873248
	Centiloid	Longitudinal	rs17556884	18	34736455	DTNA	t	c	780	-0.211	--	0.8325	0.981945
	Centiloid	Longitudinal	rs1480428	18	34738732	DTNA	a	g	780	-2.013	--	0.04406	0.592525
	Centiloid	Longitudinal	rs12957349	18	34739291	DTNA	t	c	780	-0.131	-+	0.8961	0.988921
	Centiloid	Longitudinal	rs12608110	18	34752198	DTNA	a	g	780	-1.389	--	0.165	0.873248
	Centiloid	Longitudinal	rs7228547	18	34760039	DTNA	a	g	780	-2.168	--	0.03014	0.592525
	Centiloid	Longitudinal	rs8099437	18	34761448	DTNA	t	g	780	-1.925	--	0.05424	0.592525
	Centiloid	Longitudinal	rs72955132	18	34762382	DTNA	a	g	780	-0.231	--	0.8175	0.981945
	Centiloid	Longitudinal	rs1817452	18	34776629	DTNA	t	c	780	-0.066	+-	0.9477	0.991106
	Centiloid	Longitudinal	rs56404226	18	34778060	DTNA	a	g	780	1.065	++	0.2868	0.915792
	Centiloid	Longitudinal	rs72955175	18	34779045	DTNA	a	t	780	-1.877	--	0.06055	0.592525
	Centiloid	Longitudinal	rs12608251	18	34782906	DTNA	t	g	780	1.562	++	0.1182	0.831341
	Centiloid	Longitudinal	rs76880720	18	34791141	DTNA	a	c	780	0.109	+-	0.9134	0.989456
	Centiloid	Longitudinal	rs9989533	18	34793909	DTNA	t	c	780	-0.273	-+	0.7845	0.981945
	Centiloid	Longitudinal	rs79500711	18	34794379	DTNA	a	g	780	-0.469	+-	0.6393	0.981945
	Centiloid	Longitudinal	rs138856611	18	34801684	DTNA	t	g	780	-1.539	--	0.1237	0.831341
	Centiloid	Longitudinal	rs62097226	18	34804223	DTNA	a	t	780	0.619	-+	0.5361	0.964796
	Centiloid	Longitudinal	rs4458079	18	34806161	DTNA	t	c	780	-0.527	--	0.5984	0.981945
	Centiloid	Longitudinal	rs8086358	18	34813672	DTNA	t	g	780	2.347	++	0.01895	0.592525
	Centiloid	Longitudinal	rs72963047	18	34818804	DTNA	a	c	780	0.649	-+	0.5165	0.964796
	Centiloid	Longitudinal	rs17557660	18	34831178	DTNA	a	t	780	-0.321	--	0.7482	0.981945
	Centiloid	Longitudinal	rs1790533	18	34831631	DTNA	a	g	780	1.073	++	0.2831	0.915792
	Centiloid	Longitudinal	rs4799782	18	34841123	DTNA	a	g	780	2.002	++	0.04531	0.592525
	Centiloid	Longitudinal	rs1786604	18	34846264	DTNA	a	g	780	-2.101	--	0.0356	0.592525
	Centiloid	Longitudinal	rs7233779	18	34863262	DTNA	a	g	780	0.337	-+	0.7359	0.981945
	Centiloid	Longitudinal	rs644982	18	34869793	DTNA	a	g	780	2.593	++	0.009527	0.592525
	Centiloid	Longitudinal	rs11659517	18	34870978	DTNA	a	t	780	-0.794	--	0.427	0.960142
	Centiloid	Longitudinal	rs524969	18	34872102	DTNA	a	t	780	-1.161	--	0.2457	0.915792
	Centiloid	Longitudinal	rs637914	18	34876135	DTNA	a	t	780	-1.599	--	0.1099	0.831341
	Centiloid	Longitudinal	rs9304141	18	34879143	DTNA	t	c	780	-0.68	--	0.4966	0.960142
	Centiloid	Longitudinal	rs2288085	18	34879740	DTNA	a	g	780	-0.082	+-	0.9349	0.989456
	Centiloid	Longitudinal	rs17558116	18	34882719	DTNA	t	c	780	0.269	-+	0.7878	0.981945
	Centiloid	Longitudinal	rs10502637	18	34890006	DTNA	t	c	780	1.031	++	0.3027	0.915792
	Centiloid	Longitudinal	rs149163416	18	34898841	DTNA	a	g	780	0.467	++	0.6408	0.981945
	Centiloid	Longitudinal	20:33413780	20	33413780	SNTA1	a	t	780	0.318	-+	0.7504	0.981945
	Centiloid	Longitudinal	rs291683	20	33431611	SNTA1	t	c	780	0.26	+-	0.7945	0.981945
	Centiloid	Longitudinal	20:33433270	20	33433270	SNTA1	t	c	780	0.384	-+	0.7011	0.981945
	Centiloid	Longitudinal	rs6141396	20	33436147	SNTA1	a	c	346	-0.673	-?	0.5007	0.960142
	Centiloid	Longitudinal	rs293721	20	33441633	SNTA1	t	c	780	-0.051	+-	0.959	0.991779
	Grey_Matter_Volume	Cross-Sectional	rs111599092	3	49465346	DAG1	a	g	846	0.085	-+	0.9319	0.975837
	Grey_Matter_Volume	Cross-Sectional	rs73073015	3	49465733	DAG1	a	g	846	2.909	++	0.003626	0.211446
	Grey_Matter_Volume	Cross-Sectional	rs7611164	3	49471395	DAG1	t	g	846	2.728	++	0.00637	0.211446
	Grey_Matter_Volume	Cross-Sectional	rs1568661	3	49483525	DAG1	a	g	846	1.72	++	0.0854	0.746817
	Grey_Matter_Volume	Cross-Sectional	rs7374731	3	49495661	DAG1	c	g	846	-0.188	--	0.851	0.936952
	Grey_Matter_Volume	Cross-Sectional	rs73074811	3	49516098	DAG1	a	t	846	0.79	+-	0.4296	0.89331
	Grey_Matter_Volume	Cross-Sectional	rs3870338	3	49519618	DAG1	a	g	846	1.743	++	0.08129	0.746817
	Grey_Matter_Volume	Cross-Sectional	rs55935606	3	49528072	DAG1	a	g	846	0.563	++	0.5737	0.921837
	Grey_Matter_Volume	Cross-Sectional	rs75153130	3	49530436	DAG1	a	c	846	-2.728	--	0.00637	0.211446
	Grey_Matter_Volume	Cross-Sectional	rs13079082	3	49537375	DAG1	c	g	846	-1.88	--	0.06009	0.746817
	Grey_Matter_Volume	Cross-Sectional	rs4052546	3	49538116	DAG1	c	g	846	0.188	++	0.851	0.936952
	Grey_Matter_Volume	Cross-Sectional	rs73074830	3	49539584	DAG1	a	c	846	0.729	+-	0.466	0.89331
	Grey_Matter_Volume	Cross-Sectional	rs114093899	3	49539955	DAG1	c	g	846	-1.157	--	0.2472	0.806343
	Grey_Matter_Volume	Cross-Sectional	rs9789109	18	26842291	AQP4	a	g	846	1.452	++	0.1465	0.746817
	Grey_Matter_Volume	Cross-Sectional	rs10164026	18	26842362	AQP4	a	c	846	0.44	++	0.6598	0.934707
	Grey_Matter_Volume	Cross-Sectional	rs4800270	18	26844933	AQP4	t	g	846	-0.214	+-	0.8305	0.936952
	Grey_Matter_Volume	Cross-Sectional	rs79668602	18	26845488	AQP4	a	g	846	-1.252	--	0.2107	0.746817
	Grey_Matter_Volume	Cross-Sectional	rs12458416	18	26847267	AQP4	c	g	846	-1.217	--	0.2235	0.746817
	Grey_Matter_Volume	Cross-Sectional	rs12953446	18	26848521	AQP4	a	g	846	0.859	++	0.3903	0.876575
	Grey_Matter_Volume	Cross-Sectional	rs67461489	18	26848876	AQP4	t	c	846	1.408	++	0.1591	0.746817
	Grey_Matter_Volume	Cross-Sectional	rs11661081	18	26850068	AQP4	a	c	846	-0.676	-+	0.4988	0.89331
	Grey_Matter_Volume	Cross-Sectional	rs3763043	18	26855854	AQP4	t	c	846	-0.339	+-	0.7347	0.936952
	Grey_Matter_Volume	Cross-Sectional	rs68006382	18	26856555	AQP4	a	g	846	1.276	++	0.202	0.746817
	Grey_Matter_Volume	Cross-Sectional	rs335930	18	26856961	AQP4	a	c	846	-1.309	--	0.1905	0.746817
	Grey_Matter_Volume	Cross-Sectional	rs71353405	18	26857429	AQP4	t	c	846	-0.177	-+	0.8596	0.936952
	Grey_Matter_Volume	Cross-Sectional	rs162009	18	26864250	AQP4	a	g	846	0.518	-+	0.6045	0.931446
	Grey_Matter_Volume	Cross-Sectional	rs4800773	18	26865017	AQP4	a	g	846	0.056	-+	0.9557	0.9821
	Grey_Matter_Volume	Cross-Sectional	rs3875089	18	26865469	AQP4	t	c	846	1.921	++	0.05474	0.746817
	Grey_Matter_Volume	Cross-Sectional	rs72878787	18	26866517	AQP4	a	g	846	1.401	+-	0.1612	0.746817
	Grey_Matter_Volume	Cross-Sectional	rs162006	18	26866570	AQP4	t	c	846	1.502	++	0.1332	0.746817
	Grey_Matter_Volume	Cross-Sectional	rs151244	18	26866755	AQP4	t	c	846	-0.396	--	0.6921	0.936952
	Grey_Matter_Volume	Cross-Sectional	rs72878794	18	26866839	AQP4	t	c	846	-1.067	--	0.2859	0.816006
	Grey_Matter_Volume	Cross-Sectional	rs9961118	18	26866901	AQP4	t	c	846	-0.247	--	0.8045	0.936952
	Grey_Matter_Volume	Cross-Sectional	rs162004	18	26867972	AQP4	c	g	846	0.028	-+	0.9776	0.9821
	Grey_Matter_Volume	Cross-Sectional	rs72878799	18	26868165	AQP4	a	g	846	0.959	++	0.3377	0.84118
	Grey_Matter_Volume	Cross-Sectional	rs11662318	18	26869056	AQP4	t	c	846	-0.165	+-	0.8693	0.936952
	Grey_Matter_Volume	Cross-Sectional	rs151246	18	26869139	AQP4	t	g	846	0.216	-+	0.8292	0.936952
	Grey_Matter_Volume	Cross-Sectional	rs491148	18	26869803	AQP4	a	g	846	0.923	++	0.3558	0.855168
	Grey_Matter_Volume	Cross-Sectional	rs162002	18	26871015	AQP4	a	g	846	0.277	-+	0.7819	0.936952
	Grey_Matter_Volume	Cross-Sectional	rs162001	18	26871481	AQP4	a	c	846	1.329	++	0.1837	0.746817
	Grey_Matter_Volume	Cross-Sectional	rs3865411	18	26871684	AQP4	a	g	846	0.469	-+	0.6394	0.934707
	Grey_Matter_Volume	Cross-Sectional	rs162000	18	26872471	AQP4	a	c	846	0.172	+-	0.8634	0.936952
	Grey_Matter_Volume	Cross-Sectional	rs12969503	18	26873564	AQP4	t	g	846	2.664	++	0.007717	0.211446
	Grey_Matter_Volume	Cross-Sectional	rs8094228	18	26873767	AQP4	t	c	846	-2.703	--	0.006866	0.211446
	Grey_Matter_Volume	Cross-Sectional	rs480647	18	26874290	AQP4	t	c	846	0.562	++	0.5739	0.921837
	Grey_Matter_Volume	Cross-Sectional	rs10502478	18	26874616	AQP4	a	c	846	0.199	-+	0.8419	0.936952
	Grey_Matter_Volume	Cross-Sectional	rs7234562	18	34483685	DTNA	t	c	846	0.378	-+	0.7052	0.936952
	Grey_Matter_Volume	Cross-Sectional	rs79922046	18	34485536	DTNA	a	g	846	0.122	-+	0.9033	0.959319
	Grey_Matter_Volume	Cross-Sectional	rs9955950	18	34485672	DTNA	t	c	846	0.441	-+	0.6589	0.934707
	Grey_Matter_Volume	Cross-Sectional	rs12957028	18	34485948	DTNA	a	g	846	-0.963	+-	0.3358	0.84118
	Grey_Matter_Volume	Cross-Sectional	rs72639491	18	34491438	DTNA	a	g	846	0.084	-+	0.9331	0.975837
	Grey_Matter_Volume	Cross-Sectional	rs62097347	18	34492032	DTNA	c	g	846	-0.627	+-	0.5305	0.919981
	Grey_Matter_Volume	Cross-Sectional	rs9961251	18	34492344	DTNA	t	c	846	-0.329	--	0.7418	0.936952
	Grey_Matter_Volume	Cross-Sectional	rs111846993	18	34494001	DTNA	t	c	846	0.437	++	0.6618	0.934707
	Grey_Matter_Volume	Cross-Sectional	rs4799769	18	34494577	DTNA	c	g	846	1.512	++	0.1305	0.746817
	Grey_Matter_Volume	Cross-Sectional	rs8092794	18	34496273	DTNA	a	g	846	-1.332	--	0.1829	0.746817
	Grey_Matter_Volume	Cross-Sectional	rs7243528	18	34497055	DTNA	t	c	846	0.022	-+	0.9821	0.9821
	Grey_Matter_Volume	Cross-Sectional	rs79972565	18	34497194	DTNA	t	g	846	0.039	++	0.9692	0.9821
	Grey_Matter_Volume	Cross-Sectional	rs35839923	18	34497764	DTNA	a	g	846	-0.245	-+	0.8065	0.936952
	Grey_Matter_Volume	Cross-Sectional	rs62097349	18	34499519	DTNA	a	g	846	-1.233	-+	0.2177	0.746817
	Grey_Matter_Volume	Cross-Sectional	rs9965622	18	34502153	DTNA	t	c	846	-1.536	--	0.1245	0.746817
	Grey_Matter_Volume	Cross-Sectional	rs62098462	18	34504364	DTNA	t	c	846	-1.08	--	0.28	0.816006
	Grey_Matter_Volume	Cross-Sectional	rs75127284	18	34506592	DTNA	a	c	846	0.264	-+	0.7919	0.936952
	Grey_Matter_Volume	Cross-Sectional	rs2439861	18	34507940	DTNA	a	g	846	-0.237	+-	0.8123	0.936952
	Grey_Matter_Volume	Cross-Sectional	rs35982920	18	34516411	DTNA	a	g	846	0.176	+-	0.8603	0.936952
	Grey_Matter_Volume	Cross-Sectional	rs2509597	18	34528430	DTNA	a	t	846	0.84	+-	0.4012	0.886523
	Grey_Matter_Volume	Cross-Sectional	rs71363449	18	34531997	DTNA	t	c	846	-1.289	--	0.1974	0.746817
	Grey_Matter_Volume	Cross-Sectional	rs2439853	18	34533937	DTNA	a	g	846	-0.756	--	0.4497	0.89331
	Grey_Matter_Volume	Cross-Sectional	rs2439000	18	34536414	DTNA	c	g	846	-0.593	+-	0.5529	0.921837
	Grey_Matter_Volume	Cross-Sectional	rs11875892	18	34544032	DTNA	a	g	846	-0.453	+-	0.6504	0.934707
	Grey_Matter_Volume	Cross-Sectional	rs1967583	18	34544573	DTNA	t	c	846	-1.451	--	0.1467	0.746817
	Grey_Matter_Volume	Cross-Sectional	rs28856895	18	34555507	DTNA	a	g	846	-0.685	+-	0.4932	0.89331
	Grey_Matter_Volume	Cross-Sectional	rs77973497	18	34560529	DTNA	a	c	846	-1.731	--	0.08344	0.746817
	Grey_Matter_Volume	Cross-Sectional	rs2579796	18	34569243	DTNA	a	g	846	-0.738	--	0.4606	0.89331
	Grey_Matter_Volume	Cross-Sectional	rs2579797	18	34571732	DTNA	t	g	846	0.406	-+	0.6848	0.936952
	Grey_Matter_Volume	Cross-Sectional	rs2685557	18	34576782	DTNA	t	c	846	-0.695	--	0.4869	0.89331
	Grey_Matter_Volume	Cross-Sectional	rs9958492	18	34577783	DTNA	t	c	846	-1.343	--	0.1792	0.746817
	Grey_Matter_Volume	Cross-Sectional	rs2579802	18	34579787	DTNA	a	c	846	0.157	++	0.8754	0.936952
	Grey_Matter_Volume	Cross-Sectional	rs74920018	18	34607557	DTNA	a	t	846	-1.802	--	0.07159	0.746817
	Grey_Matter_Volume	Cross-Sectional	rs1439127	18	34607759	DTNA	a	t	846	-0.863	--	0.388	0.876575
	Grey_Matter_Volume	Cross-Sectional	rs12327368	18	34611361	DTNA	a	g	846	-1.575	--	0.1154	0.746817
	Grey_Matter_Volume	Cross-Sectional	rs62097188	18	34611412	DTNA	a	g	846	-0.484	--	0.6285	0.934707
	Grey_Matter_Volume	Cross-Sectional	rs9807153	18	34635520	DTNA	a	t	846	0.982	+-	0.326	0.84118
	Grey_Matter_Volume	Cross-Sectional	rs2730126	18	34635939	DTNA	a	c	846	-1.022	--	0.3066	0.823612
	Grey_Matter_Volume	Cross-Sectional	rs1659526	18	34644451	DTNA	a	g	846	0.194	-+	0.8461	0.936952
	Grey_Matter_Volume	Cross-Sectional	rs17642885	18	34649976	DTNA	t	c	846	-0.713	--	0.4759	0.89331
	Grey_Matter_Volume	Cross-Sectional	rs1240974	18	34650949	DTNA	t	c	846	0.414	++	0.679	0.936952
	Grey_Matter_Volume	Cross-Sectional	rs55869511	18	34651262	DTNA	a	c	846	1.276	++	0.202	0.746817
	Grey_Matter_Volume	Cross-Sectional	rs12955208	18	34656737	DTNA	a	g	846	-1.129	--	0.2587	0.816006
	Grey_Matter_Volume	Cross-Sectional	rs72953203	18	34660068	DTNA	a	g	846	2.169	++	0.03005	0.686142
	Grey_Matter_Volume	Cross-Sectional	rs9946070	18	34665505	DTNA	a	g	846	-0.576	--	0.5648	0.921837
	Grey_Matter_Volume	Cross-Sectional	rs72953211	18	34673381	DTNA	a	c	846	-0.545	--	0.5854	0.921837
	Grey_Matter_Volume	Cross-Sectional	rs55971592	18	34697328	DTNA	a	g	846	1.116	++	0.2644	0.816006
	Grey_Matter_Volume	Cross-Sectional	rs78837792	18	34703359	DTNA	t	c	846	-0.611	--	0.5414	0.921837
	Grey_Matter_Volume	Cross-Sectional	rs11663468	18	34707936	DTNA	t	c	846	0.672	++	0.5015	0.89331
	Grey_Matter_Volume	Cross-Sectional	rs12963825	18	34709484	DTNA	a	g	846	-1.043	--	0.2968	0.823612
	Grey_Matter_Volume	Cross-Sectional	rs1480432	18	34727166	DTNA	t	g	846	-1.844	--	0.06526	0.746817
	Grey_Matter_Volume	Cross-Sectional	rs45556134	18	34729425	DTNA	a	g	846	-0.806	--	0.4202	0.89331
	Grey_Matter_Volume	Cross-Sectional	rs899828	18	34732688	DTNA	t	g	846	-0.056	+-	0.9551	0.9821
	Grey_Matter_Volume	Cross-Sectional	rs17556884	18	34736455	DTNA	t	c	846	1.511	++	0.1307	0.746817
	Grey_Matter_Volume	Cross-Sectional	rs1480428	18	34738732	DTNA	a	g	846	0.668	++	0.504	0.89331
	Grey_Matter_Volume	Cross-Sectional	rs12957349	18	34739291	DTNA	t	c	846	-1.613	--	0.1067	0.746817
	Grey_Matter_Volume	Cross-Sectional	rs12608110	18	34752198	DTNA	a	g	846	0.274	+-	0.7844	0.936952
	Grey_Matter_Volume	Cross-Sectional	rs7228547	18	34760039	DTNA	a	g	846	-0.661	--	0.5086	0.89331
	Grey_Matter_Volume	Cross-Sectional	rs8099437	18	34761448	DTNA	t	g	846	0.601	-+	0.5475	0.921837
	Grey_Matter_Volume	Cross-Sectional	rs72955132	18	34762382	DTNA	a	g	846	1.45	++	0.1471	0.746817
	Grey_Matter_Volume	Cross-Sectional	rs1817452	18	34776629	DTNA	t	c	846	-1.472	--	0.1411	0.746817
	Grey_Matter_Volume	Cross-Sectional	rs56404226	18	34778060	DTNA	a	g	846	-0.773	--	0.4398	0.89331
	Grey_Matter_Volume	Cross-Sectional	rs72955175	18	34779045	DTNA	a	t	846	-1.228	--	0.2194	0.746817
	Grey_Matter_Volume	Cross-Sectional	rs12608251	18	34782906	DTNA	t	g	846	-0.2	-+	0.8416	0.936952
	Grey_Matter_Volume	Cross-Sectional	rs76880720	18	34791141	DTNA	a	c	846	1.406	++	0.1597	0.746817
	Grey_Matter_Volume	Cross-Sectional	rs9989533	18	34793909	DTNA	t	c	846	0.662	++	0.5081	0.89331
	Grey_Matter_Volume	Cross-Sectional	rs79500711	18	34794379	DTNA	a	g	846	-0.314	--	0.7535	0.936952
	Grey_Matter_Volume	Cross-Sectional	rs138856611	18	34801684	DTNA	t	g	846	-0.682	--	0.4953	0.89331
	Grey_Matter_Volume	Cross-Sectional	rs62097226	18	34804223	DTNA	a	t	846	-1.087	--	0.2769	0.816006
	Grey_Matter_Volume	Cross-Sectional	rs4458079	18	34806161	DTNA	t	c	846	-1.942	--	0.0522	0.746817
	Grey_Matter_Volume	Cross-Sectional	rs8086358	18	34813672	DTNA	t	g	846	1.082	++	0.2795	0.816006
	Grey_Matter_Volume	Cross-Sectional	rs72963047	18	34818804	DTNA	a	c	846	-1.504	--	0.1326	0.746817
	Grey_Matter_Volume	Cross-Sectional	rs17557660	18	34831178	DTNA	a	t	846	-0.038	+-	0.9701	0.9821
	Grey_Matter_Volume	Cross-Sectional	rs1790533	18	34831631	DTNA	a	g	846	-0.439	-+	0.6605	0.934707
	Grey_Matter_Volume	Cross-Sectional	rs4799782	18	34841123	DTNA	a	g	846	0.911	++	0.3621	0.855305
	Grey_Matter_Volume	Cross-Sectional	rs1786604	18	34846264	DTNA	a	g	846	-1.235	--	0.217	0.746817
	Grey_Matter_Volume	Cross-Sectional	rs7233779	18	34863262	DTNA	a	g	846	-0.34	--	0.7338	0.936952
	Grey_Matter_Volume	Cross-Sectional	rs644982	18	34869793	DTNA	a	g	846	0.924	-+	0.3556	0.855168
	Grey_Matter_Volume	Cross-Sectional	rs11659517	18	34870978	DTNA	a	t	846	-1.32	--	0.1868	0.746817
	Grey_Matter_Volume	Cross-Sectional	rs524969	18	34872102	DTNA	a	t	846	0.517	+-	0.6051	0.931446
	Grey_Matter_Volume	Cross-Sectional	rs637914	18	34876135	DTNA	a	t	846	0.307	+-	0.7585	0.936952
	Grey_Matter_Volume	Cross-Sectional	rs9304141	18	34879143	DTNA	t	c	846	1.031	++	0.3026	0.823612
	Grey_Matter_Volume	Cross-Sectional	rs2288085	18	34879740	DTNA	a	g	846	0.441	++	0.6591	0.934707
	Grey_Matter_Volume	Cross-Sectional	rs17558116	18	34882719	DTNA	t	c	846	-0.978	--	0.3279	0.84118
	Grey_Matter_Volume	Cross-Sectional	rs10502637	18	34890006	DTNA	t	c	846	0.402	++	0.6875	0.936952
	Grey_Matter_Volume	Cross-Sectional	rs149163416	18	34898841	DTNA	a	g	846	-0.555	--	0.5789	0.921837
	Grey_Matter_Volume	Cross-Sectional	20:33413780	20	33413780	SNTA1	a	t	846	0.78	+-	0.4353	0.89331
	Grey_Matter_Volume	Cross-Sectional	rs291683	20	33431611	SNTA1	t	c	846	-0.868	--	0.3856	0.876575
	Grey_Matter_Volume	Cross-Sectional	20:33433270	20	33433270	SNTA1	t	c	846	0.277	++	0.7818	0.936952
	Grey_Matter_Volume	Cross-Sectional	rs6141396	20	33436147	SNTA1	a	c	328	-0.357	-?	0.7209	0.936952
	Grey_Matter_Volume	Cross-Sectional	rs293721	20	33441633	SNTA1	t	c	846	0.247	-+	0.8046	0.936952
	Grey_Matter_Volume	Longitudinal	rs111599092	3	49465346	DAG1	a	g	309	0.111	++	0.9113	0.973337
	Grey_Matter_Volume	Longitudinal	rs73073015	3	49465733	DAG1	a	g	309	1.09	++	0.2758	0.674675
	Grey_Matter_Volume	Longitudinal	rs7611164	3	49471395	DAG1	t	g	309	-0.216	-+	0.8291	0.923469
	Grey_Matter_Volume	Longitudinal	rs1568661	3	49483525	DAG1	a	g	309	-0.021	-+	0.9834	0.990631
	Grey_Matter_Volume	Longitudinal	rs7374731	3	49495661	DAG1	c	g	309	-1.243	-+	0.214	0.63603
	Grey_Matter_Volume	Longitudinal	rs73074811	3	49516098	DAG1	a	t	309	0.065	-+	0.9485	0.977026
	Grey_Matter_Volume	Longitudinal	rs3870338	3	49519618	DAG1	a	g	309	-0.021	-+	0.9834	0.990631
	Grey_Matter_Volume	Longitudinal	rs55935606	3	49528072	DAG1	a	g	309	0.743	+-	0.4578	0.710245
	Grey_Matter_Volume	Longitudinal	rs75153130	3	49530436	DAG1	a	c	309	0.216	+-	0.8291	0.923469
	Grey_Matter_Volume	Longitudinal	rs13079082	3	49537375	DAG1	c	g	309	-1.192	--	0.2333	0.652288
	Grey_Matter_Volume	Longitudinal	rs4052546	3	49538116	DAG1	c	g	309	1.243	+-	0.214	0.63603
	Grey_Matter_Volume	Longitudinal	rs73074830	3	49539584	DAG1	a	c	309	-0.874	--	0.382	0.695894
	Grey_Matter_Volume	Longitudinal	rs114093899	3	49539955	DAG1	c	g	309	0.074	+-	0.941	0.977026
	Grey_Matter_Volume	Longitudinal	rs9789109	18	26842291	AQP4	a	g	309	-0.956	--	0.3392	0.674675
	Grey_Matter_Volume	Longitudinal	rs10164026	18	26842362	AQP4	a	c	309	0.523	-+	0.6013	0.798873
	Grey_Matter_Volume	Longitudinal	rs4800270	18	26844933	AQP4	t	g	309	-2.506	--	0.01222	0.453861
	Grey_Matter_Volume	Longitudinal	rs79668602	18	26845488	AQP4	a	g	309	-0.955	--	0.3398	0.674675
	Grey_Matter_Volume	Longitudinal	rs12458416	18	26847267	AQP4	c	g	309	0.575	-+	0.5655	0.789341
	Grey_Matter_Volume	Longitudinal	rs12953446	18	26848521	AQP4	a	g	309	-2.298	--	0.02155	0.453861
	Grey_Matter_Volume	Longitudinal	rs67461489	18	26848876	AQP4	t	c	309	1.53	++	0.1261	0.63603
	Grey_Matter_Volume	Longitudinal	rs11661081	18	26850068	AQP4	a	c	309	1.291	++	0.1968	0.63603
	Grey_Matter_Volume	Longitudinal	rs3763043	18	26855854	AQP4	t	c	309	-0.505	--	0.6139	0.798873
	Grey_Matter_Volume	Longitudinal	rs68006382	18	26856555	AQP4	a	g	309	0.262	+-	0.7937	0.921499
	Grey_Matter_Volume	Longitudinal	rs335930	18	26856961	AQP4	a	c	309	1.494	++	0.1351	0.63603
	Grey_Matter_Volume	Longitudinal	rs71353405	18	26857429	AQP4	t	c	309	-0.971	--	0.3316	0.674675
	Grey_Matter_Volume	Longitudinal	rs162009	18	26864250	AQP4	a	g	309	-1.554	--	0.1202	0.63603
	Grey_Matter_Volume	Longitudinal	rs4800773	18	26865017	AQP4	a	g	309	-1.337	--	0.1811	0.63603
	Grey_Matter_Volume	Longitudinal	rs3875089	18	26865469	AQP4	t	c	309	2.27	++	0.02319	0.453861
	Grey_Matter_Volume	Longitudinal	rs72878787	18	26866517	AQP4	a	g	309	-1.323	--	0.1857	0.63603
	Grey_Matter_Volume	Longitudinal	rs162006	18	26866570	AQP4	t	c	309	-0.782	--	0.4343	0.708099
	Grey_Matter_Volume	Longitudinal	rs151244	18	26866755	AQP4	t	c	309	0.838	++	0.4022	0.695894
	Grey_Matter_Volume	Longitudinal	rs72878794	18	26866839	AQP4	t	c	309	1.051	++	0.2933	0.674675
	Grey_Matter_Volume	Longitudinal	rs9961118	18	26866901	AQP4	t	c	309	0.879	++	0.3792	0.695894
	Grey_Matter_Volume	Longitudinal	rs162004	18	26867972	AQP4	c	g	309	1.401	++	0.1611	0.63603
	Grey_Matter_Volume	Longitudinal	rs72878799	18	26868165	AQP4	a	g	309	0.98	+-	0.3269	0.674675
	Grey_Matter_Volume	Longitudinal	rs11662318	18	26869056	AQP4	t	c	309	-0.568	--	0.5704	0.789341
	Grey_Matter_Volume	Longitudinal	rs151246	18	26869139	AQP4	t	g	309	1.661	++	0.09668	0.63603
	Grey_Matter_Volume	Longitudinal	rs491148	18	26869803	AQP4	a	g	309	1.04	++	0.2983	0.674675
	Grey_Matter_Volume	Longitudinal	rs162002	18	26871015	AQP4	a	g	309	0.474	-+	0.6356	0.798873
	Grey_Matter_Volume	Longitudinal	rs162001	18	26871481	AQP4	a	c	309	-0.075	+-	0.9406	0.977026
	Grey_Matter_Volume	Longitudinal	rs3865411	18	26871684	AQP4	a	g	309	0.045	+-	0.964	0.985582
	Grey_Matter_Volume	Longitudinal	rs162000	18	26872471	AQP4	a	c	309	-0.808	--	0.4192	0.695894
	Grey_Matter_Volume	Longitudinal	rs12969503	18	26873564	AQP4	t	g	309	-0.842	--	0.3997	0.695894
	Grey_Matter_Volume	Longitudinal	rs8094228	18	26873767	AQP4	t	c	309	0.586	++	0.5579	0.789341
	Grey_Matter_Volume	Longitudinal	rs480647	18	26874290	AQP4	t	c	309	0.006	+-	0.9955	0.9955
	Grey_Matter_Volume	Longitudinal	rs10502478	18	26874616	AQP4	a	c	309	0.477	++	0.6336	0.798873
	Grey_Matter_Volume	Longitudinal	rs7234562	18	34483685	DTNA	t	c	309	-0.116	-+	0.9074	0.973337
	Grey_Matter_Volume	Longitudinal	rs79922046	18	34485536	DTNA	a	g	309	-0.401	--	0.6881	0.843651
	Grey_Matter_Volume	Longitudinal	rs9955950	18	34485672	DTNA	t	c	309	0.172	+-	0.8634	0.953918
	Grey_Matter_Volume	Longitudinal	rs12957028	18	34485948	DTNA	a	g	309	0.498	++	0.6185	0.798873
	Grey_Matter_Volume	Longitudinal	rs72639491	18	34491438	DTNA	a	g	309	0.492	++	0.6229	0.798873
	Grey_Matter_Volume	Longitudinal	rs62097347	18	34492032	DTNA	c	g	309	-1.446	--	0.1481	0.63603
	Grey_Matter_Volume	Longitudinal	rs9961251	18	34492344	DTNA	t	c	309	-0.286	-+	0.7745	0.914711
	Grey_Matter_Volume	Longitudinal	rs111846993	18	34494001	DTNA	t	c	309	-0.899	+-	0.3685	0.695894
	Grey_Matter_Volume	Longitudinal	rs4799769	18	34494577	DTNA	c	g	309	-0.245	--	0.8067	0.923469
	Grey_Matter_Volume	Longitudinal	rs8092794	18	34496273	DTNA	a	g	309	0.741	++	0.4585	0.710245
	Grey_Matter_Volume	Longitudinal	rs7243528	18	34497055	DTNA	t	c	309	-1.797	--	0.07241	0.63603
	Grey_Matter_Volume	Longitudinal	rs79972565	18	34497194	DTNA	t	g	309	-1.674	--	0.09408	0.63603
	Grey_Matter_Volume	Longitudinal	rs35839923	18	34497764	DTNA	a	g	309	0.666	+-	0.5052	0.752309
	Grey_Matter_Volume	Longitudinal	rs62097349	18	34499519	DTNA	a	g	309	0.942	++	0.3461	0.677367
	Grey_Matter_Volume	Longitudinal	rs9965622	18	34502153	DTNA	t	c	309	0.371	++	0.7109	0.854327
	Grey_Matter_Volume	Longitudinal	rs62098462	18	34504364	DTNA	t	c	309	0.916	-+	0.3597	0.694069
	Grey_Matter_Volume	Longitudinal	rs75127284	18	34506592	DTNA	a	c	309	0.399	+-	0.6897	0.843651
	Grey_Matter_Volume	Longitudinal	rs2439861	18	34507940	DTNA	a	g	309	-1.242	--	0.2144	0.63603
	Grey_Matter_Volume	Longitudinal	rs35982920	18	34516411	DTNA	a	g	309	-0.804	-+	0.4216	0.695894
	Grey_Matter_Volume	Longitudinal	rs2509597	18	34528430	DTNA	a	t	309	-1.49	--	0.1361	0.63603
	Grey_Matter_Volume	Longitudinal	rs71363449	18	34531997	DTNA	t	c	309	0.489	++	0.6251	0.798873
	Grey_Matter_Volume	Longitudinal	rs2439853	18	34533937	DTNA	a	g	309	1.419	++	0.1559	0.63603
	Grey_Matter_Volume	Longitudinal	rs2439000	18	34536414	DTNA	c	g	309	-1.772	--	0.07645	0.63603
	Grey_Matter_Volume	Longitudinal	rs11875892	18	34544032	DTNA	a	g	309	0.108	-+	0.9142	0.973337
	Grey_Matter_Volume	Longitudinal	rs1967583	18	34544573	DTNA	t	c	309	-0.726	--	0.468	0.7124
	Grey_Matter_Volume	Longitudinal	rs28856895	18	34555507	DTNA	a	g	309	0.859	++	0.3901	0.695894
	Grey_Matter_Volume	Longitudinal	rs77973497	18	34560529	DTNA	a	c	309	1.067	++	0.2858	0.674675
	Grey_Matter_Volume	Longitudinal	rs2579796	18	34569243	DTNA	a	g	309	1.693	++	0.09049	0.63603
	Grey_Matter_Volume	Longitudinal	rs2579797	18	34571732	DTNA	t	g	309	1.784	++	0.07443	0.63603
	Grey_Matter_Volume	Longitudinal	rs2685557	18	34576782	DTNA	t	c	309	1.739	++	0.08209	0.63603
	Grey_Matter_Volume	Longitudinal	rs9958492	18	34577783	DTNA	t	c	309	0.605	++	0.5451	0.786092
	Grey_Matter_Volume	Longitudinal	rs2579802	18	34579787	DTNA	a	c	309	1.106	++	0.2685	0.674675
	Grey_Matter_Volume	Longitudinal	rs74920018	18	34607557	DTNA	a	t	309	1.126	++	0.2601	0.672334
	Grey_Matter_Volume	Longitudinal	rs1439127	18	34607759	DTNA	a	t	309	-1.231	--	0.2182	0.63603
	Grey_Matter_Volume	Longitudinal	rs12327368	18	34611361	DTNA	a	g	309	0.813	++	0.4165	0.695894
	Grey_Matter_Volume	Longitudinal	rs62097188	18	34611412	DTNA	a	g	309	1.417	-+	0.1565	0.63603
	Grey_Matter_Volume	Longitudinal	rs9807153	18	34635520	DTNA	a	t	309	-1.152	--	0.2492	0.66942
	Grey_Matter_Volume	Longitudinal	rs2730126	18	34635939	DTNA	a	c	309	1.283	++	0.1994	0.63603
	Grey_Matter_Volume	Longitudinal	rs1659526	18	34644451	DTNA	a	g	309	0.642	+-	0.5206	0.766905
	Grey_Matter_Volume	Longitudinal	rs17642885	18	34649976	DTNA	t	c	309	0.987	-+	0.3238	0.674675
	Grey_Matter_Volume	Longitudinal	rs1240974	18	34650949	DTNA	t	c	309	0.536	++	0.5918	0.798873
	Grey_Matter_Volume	Longitudinal	rs55869511	18	34651262	DTNA	a	c	309	0.274	+-	0.7837	0.917666
	Grey_Matter_Volume	Longitudinal	rs12955208	18	34656737	DTNA	a	g	309	1.196	++	0.2318	0.652288
	Grey_Matter_Volume	Longitudinal	rs72953203	18	34660068	DTNA	a	g	309	1.661	++	0.09674	0.63603
	Grey_Matter_Volume	Longitudinal	rs9946070	18	34665505	DTNA	a	g	309	1.154	++	0.2487	0.66942
	Grey_Matter_Volume	Longitudinal	rs72953211	18	34673381	DTNA	a	c	309	-0.966	--	0.334	0.674675
	Grey_Matter_Volume	Longitudinal	rs55971592	18	34697328	DTNA	a	g	309	-2.34	--	0.01928	0.453861
	Grey_Matter_Volume	Longitudinal	rs78837792	18	34703359	DTNA	t	c	309	-2.303	--	0.02127	0.453861
	Grey_Matter_Volume	Longitudinal	rs11663468	18	34707936	DTNA	t	c	309	0.84	++	0.401	0.695894
	Grey_Matter_Volume	Longitudinal	rs12963825	18	34709484	DTNA	a	g	309	0.627	++	0.5306	0.773321
	Grey_Matter_Volume	Longitudinal	rs1480432	18	34727166	DTNA	t	g	309	1.909	++	0.05628	0.63603
	Grey_Matter_Volume	Longitudinal	rs45556134	18	34729425	DTNA	a	g	309	3.483	++	0.0004966	0.0680342
	Grey_Matter_Volume	Longitudinal	rs899828	18	34732688	DTNA	t	g	309	-0.429	--	0.6677	0.83159
	Grey_Matter_Volume	Longitudinal	rs17556884	18	34736455	DTNA	t	c	309	-1.016	--	0.3097	0.674675
	Grey_Matter_Volume	Longitudinal	rs1480428	18	34738732	DTNA	a	g	309	-1.292	--	0.1965	0.63603
	Grey_Matter_Volume	Longitudinal	rs12957349	18	34739291	DTNA	t	c	309	1.011	++	0.312	0.674675
	Grey_Matter_Volume	Longitudinal	rs12608110	18	34752198	DTNA	a	g	309	-0.229	--	0.8186	0.923469
	Grey_Matter_Volume	Longitudinal	rs7228547	18	34760039	DTNA	a	g	309	-0.571	+-	0.5679	0.789341
	Grey_Matter_Volume	Longitudinal	rs8099437	18	34761448	DTNA	t	g	309	-1.292	--	0.1965	0.63603
	Grey_Matter_Volume	Longitudinal	rs72955132	18	34762382	DTNA	a	g	309	-1.632	--	0.1026	0.63603
	Grey_Matter_Volume	Longitudinal	rs1817452	18	34776629	DTNA	t	c	309	0.769	++	0.4418	0.708099
	Grey_Matter_Volume	Longitudinal	rs56404226	18	34778060	DTNA	a	g	309	0.109	+-	0.9134	0.973337
	Grey_Matter_Volume	Longitudinal	rs72955175	18	34779045	DTNA	a	t	309	-0.818	--	0.4131	0.695894
	Grey_Matter_Volume	Longitudinal	rs12608251	18	34782906	DTNA	t	g	309	1.274	++	0.2027	0.63603
	Grey_Matter_Volume	Longitudinal	rs76880720	18	34791141	DTNA	a	c	309	-0.987	--	0.3238	0.674675
	Grey_Matter_Volume	Longitudinal	rs9989533	18	34793909	DTNA	t	c	309	0.07	+-	0.944	0.977026
	Grey_Matter_Volume	Longitudinal	rs79500711	18	34794379	DTNA	a	g	309	2.462	++	0.01381	0.453861
	Grey_Matter_Volume	Longitudinal	rs138856611	18	34801684	DTNA	t	g	309	1.993	++	0.04625	0.633625
	Grey_Matter_Volume	Longitudinal	rs62097226	18	34804223	DTNA	a	t	309	0.716	++	0.4738	0.713303
	Grey_Matter_Volume	Longitudinal	rs4458079	18	34806161	DTNA	t	c	309	-1.917	--	0.05529	0.63603
	Grey_Matter_Volume	Longitudinal	rs8086358	18	34813672	DTNA	t	g	309	0.765	++	0.4445	0.708099
	Grey_Matter_Volume	Longitudinal	rs72963047	18	34818804	DTNA	a	c	309	-1.525	--	0.1272	0.63603
	Grey_Matter_Volume	Longitudinal	rs17557660	18	34831178	DTNA	a	t	309	0.105	+-	0.9165	0.973337
	Grey_Matter_Volume	Longitudinal	rs1790533	18	34831631	DTNA	a	g	309	1.545	++	0.1223	0.63603
	Grey_Matter_Volume	Longitudinal	rs4799782	18	34841123	DTNA	a	g	309	-2.142	--	0.03223	0.551939
	Grey_Matter_Volume	Longitudinal	rs1786604	18	34846264	DTNA	a	g	309	-1.291	--	0.1966	0.63603
	Grey_Matter_Volume	Longitudinal	rs7233779	18	34863262	DTNA	a	g	309	-1.413	--	0.1576	0.63603
	Grey_Matter_Volume	Longitudinal	rs644982	18	34869793	DTNA	a	g	309	1.38	++	0.1675	0.63603
	Grey_Matter_Volume	Longitudinal	rs11659517	18	34870978	DTNA	a	t	309	0.736	++	0.4614	0.710245
	Grey_Matter_Volume	Longitudinal	rs524969	18	34872102	DTNA	a	t	309	-1.62	--	0.1052	0.63603
	Grey_Matter_Volume	Longitudinal	rs637914	18	34876135	DTNA	a	t	309	-0.291	--	0.7714	0.914711
	Grey_Matter_Volume	Longitudinal	rs9304141	18	34879143	DTNA	t	c	309	-0.882	--	0.3776	0.695894
	Grey_Matter_Volume	Longitudinal	rs2288085	18	34879740	DTNA	a	g	309	0.534	-+	0.5934	0.798873
	Grey_Matter_Volume	Longitudinal	rs17558116	18	34882719	DTNA	t	c	309	-0.975	--	0.3294	0.674675
	Grey_Matter_Volume	Longitudinal	rs10502637	18	34890006	DTNA	t	c	309	-2.073	--	0.0382	0.581489
	Grey_Matter_Volume	Longitudinal	rs149163416	18	34898841	DTNA	a	g	309	0.39	-+	0.6967	0.844672
	Grey_Matter_Volume	Longitudinal	20:33413780	20	33413780	SNTA1	a	t	309	0.225	-+	0.8219	0.923469
	Grey_Matter_Volume	Longitudinal	rs291683	20	33431611	SNTA1	t	c	309	1.348	++	0.1777	0.63603
	Grey_Matter_Volume	Longitudinal	20:33433270	20	33433270	SNTA1	t	c	309	-1.135	--	0.2566	0.672334
	Grey_Matter_Volume	Longitudinal	rs6141396	20	33436147	SNTA1	a	c	169	-0.499	-?	0.6179	0.798873
	Grey_Matter_Volume	Longitudinal	rs293721	20	33441633	SNTA1	t	c	309	0.97	+-	0.3319	0.674675
	Hippocampal_Volume	Cross-Sectional	rs111599092	3	49465346	DAG1	a	g	846	1.161	++	0.2456	0.744279
	Hippocampal_Volume	Cross-Sectional	rs73073015	3	49465733	DAG1	a	g	846	0.72	++	0.4714	0.932778
	Hippocampal_Volume	Cross-Sectional	rs7611164	3	49471395	DAG1	t	g	846	0.896	-+	0.3704	0.836805
	Hippocampal_Volume	Cross-Sectional	rs1568661	3	49483525	DAG1	a	g	846	0.182	+-	0.8554	0.96677
	Hippocampal_Volume	Cross-Sectional	rs7374731	3	49495661	DAG1	c	g	846	-1.1	--	0.2712	0.744279
	Hippocampal_Volume	Cross-Sectional	rs73074811	3	49516098	DAG1	a	t	846	1.81	++	0.07036	0.658171
	Hippocampal_Volume	Cross-Sectional	rs3870338	3	49519618	DAG1	a	g	846	0.096	+-	0.9238	0.96677
	Hippocampal_Volume	Cross-Sectional	rs55935606	3	49528072	DAG1	a	g	846	1.847	++	0.06481	0.658171
	Hippocampal_Volume	Cross-Sectional	rs75153130	3	49530436	DAG1	a	c	846	-0.896	+-	0.3704	0.836805
	Hippocampal_Volume	Cross-Sectional	rs13079082	3	49537375	DAG1	c	g	846	-1.13	--	0.2586	0.744279
	Hippocampal_Volume	Cross-Sectional	rs4052546	3	49538116	DAG1	c	g	846	1.1	++	0.2712	0.744279
	Hippocampal_Volume	Cross-Sectional	rs73074830	3	49539584	DAG1	a	c	846	-0.635	--	0.5251	0.932778
	Hippocampal_Volume	Cross-Sectional	rs114093899	3	49539955	DAG1	c	g	846	1.089	++	0.2762	0.744279
	Hippocampal_Volume	Cross-Sectional	rs9789109	18	26842291	AQP4	a	g	846	-0.038	+-	0.9694	0.976528
	Hippocampal_Volume	Cross-Sectional	rs10164026	18	26842362	AQP4	a	c	846	1.127	++	0.2597	0.744279
	Hippocampal_Volume	Cross-Sectional	rs4800270	18	26844933	AQP4	t	g	846	0.007	+-	0.9945	0.9945
	Hippocampal_Volume	Cross-Sectional	rs79668602	18	26845488	AQP4	a	g	846	-0.413	-+	0.6799	0.950472
	Hippocampal_Volume	Cross-Sectional	rs12458416	18	26847267	AQP4	c	g	846	0.08	-+	0.9361	0.96677
	Hippocampal_Volume	Cross-Sectional	rs12953446	18	26848521	AQP4	a	g	846	-0.326	+-	0.7448	0.966571
	Hippocampal_Volume	Cross-Sectional	rs67461489	18	26848876	AQP4	t	c	846	1.576	++	0.1151	0.658171
	Hippocampal_Volume	Cross-Sectional	rs11661081	18	26850068	AQP4	a	c	846	-0.477	--	0.6332	0.932778
	Hippocampal_Volume	Cross-Sectional	rs3763043	18	26855854	AQP4	t	c	846	0.256	++	0.7979	0.966571
	Hippocampal_Volume	Cross-Sectional	rs68006382	18	26856555	AQP4	a	g	846	-0.083	+-	0.934	0.96677
	Hippocampal_Volume	Cross-Sectional	rs335930	18	26856961	AQP4	a	c	846	-0.514	--	0.6075	0.932778
	Hippocampal_Volume	Cross-Sectional	rs71353405	18	26857429	AQP4	t	c	846	-0.284	--	0.7766	0.966571
	Hippocampal_Volume	Cross-Sectional	rs162009	18	26864250	AQP4	a	g	846	-0.165	+-	0.8689	0.96677
	Hippocampal_Volume	Cross-Sectional	rs4800773	18	26865017	AQP4	a	g	846	-0.339	-+	0.7346	0.966571
	Hippocampal_Volume	Cross-Sectional	rs3875089	18	26865469	AQP4	t	c	846	1.595	++	0.1108	0.658171
	Hippocampal_Volume	Cross-Sectional	rs72878787	18	26866517	AQP4	a	g	846	0.443	+-	0.6581	0.950472
	Hippocampal_Volume	Cross-Sectional	rs162006	18	26866570	AQP4	t	c	846	0.08	+-	0.9361	0.96677
	Hippocampal_Volume	Cross-Sectional	rs151244	18	26866755	AQP4	t	c	846	-0.199	+-	0.8425	0.96677
	Hippocampal_Volume	Cross-Sectional	rs72878794	18	26866839	AQP4	t	c	846	0.3	-+	0.7641	0.966571
	Hippocampal_Volume	Cross-Sectional	rs9961118	18	26866901	AQP4	t	c	846	0.106	+-	0.9156	0.96677
	Hippocampal_Volume	Cross-Sectional	rs162004	18	26867972	AQP4	c	g	846	-1.493	--	0.1354	0.73295
	Hippocampal_Volume	Cross-Sectional	rs72878799	18	26868165	AQP4	a	g	846	-0.095	+-	0.9239	0.96677
	Hippocampal_Volume	Cross-Sectional	rs11662318	18	26869056	AQP4	t	c	846	-1.171	--	0.2416	0.744279
	Hippocampal_Volume	Cross-Sectional	rs151246	18	26869139	AQP4	t	g	846	-0.689	--	0.4909	0.932778
	Hippocampal_Volume	Cross-Sectional	rs491148	18	26869803	AQP4	a	g	846	1.196	++	0.2315	0.744279
	Hippocampal_Volume	Cross-Sectional	rs162002	18	26871015	AQP4	a	g	846	0.532	++	0.595	0.932778
	Hippocampal_Volume	Cross-Sectional	rs162001	18	26871481	AQP4	a	c	846	0.55	++	0.5826	0.932778
	Hippocampal_Volume	Cross-Sectional	rs3865411	18	26871684	AQP4	a	g	846	1.079	++	0.2807	0.744279
	Hippocampal_Volume	Cross-Sectional	rs162000	18	26872471	AQP4	a	c	846	1.335	++	0.1817	0.738994
	Hippocampal_Volume	Cross-Sectional	rs12969503	18	26873564	AQP4	t	g	846	0.552	-+	0.5807	0.932778
	Hippocampal_Volume	Cross-Sectional	rs8094228	18	26873767	AQP4	t	c	846	-0.422	+-	0.6734	0.950472
	Hippocampal_Volume	Cross-Sectional	rs480647	18	26874290	AQP4	t	c	846	-1.737	--	0.08238	0.658171
	Hippocampal_Volume	Cross-Sectional	rs10502478	18	26874616	AQP4	a	c	846	1.338	++	0.1809	0.738994
	Hippocampal_Volume	Cross-Sectional	rs7234562	18	34483685	DTNA	t	c	846	-0.726	--	0.468	0.932778
	Hippocampal_Volume	Cross-Sectional	rs79922046	18	34485536	DTNA	a	g	846	-1.33	--	0.1834	0.738994
	Hippocampal_Volume	Cross-Sectional	rs9955950	18	34485672	DTNA	t	c	846	-0.519	-+	0.6035	0.932778
	Hippocampal_Volume	Cross-Sectional	rs12957028	18	34485948	DTNA	a	g	846	1.838	++	0.06603	0.658171
	Hippocampal_Volume	Cross-Sectional	rs72639491	18	34491438	DTNA	a	g	846	0.503	++	0.6148	0.932778
	Hippocampal_Volume	Cross-Sectional	rs62097347	18	34492032	DTNA	c	g	846	-0.152	+-	0.8789	0.96677
	Hippocampal_Volume	Cross-Sectional	rs9961251	18	34492344	DTNA	t	c	846	-0.568	+-	0.5698	0.932778
	Hippocampal_Volume	Cross-Sectional	rs111846993	18	34494001	DTNA	t	c	846	1.033	-+	0.3014	0.779091
	Hippocampal_Volume	Cross-Sectional	rs4799769	18	34494577	DTNA	c	g	846	0.849	++	0.3956	0.860273
	Hippocampal_Volume	Cross-Sectional	rs8092794	18	34496273	DTNA	a	g	846	-0.248	--	0.8043	0.966571
	Hippocampal_Volume	Cross-Sectional	rs7243528	18	34497055	DTNA	t	c	846	-0.254	-+	0.7992	0.966571
	Hippocampal_Volume	Cross-Sectional	rs79972565	18	34497194	DTNA	t	g	846	0.115	-+	0.9081	0.96677
	Hippocampal_Volume	Cross-Sectional	rs35839923	18	34497764	DTNA	a	g	846	-1.76	--	0.07843	0.658171
	Hippocampal_Volume	Cross-Sectional	rs62097349	18	34499519	DTNA	a	g	846	-1.704	--	0.08846	0.658171
	Hippocampal_Volume	Cross-Sectional	rs9965622	18	34502153	DTNA	t	c	846	-0.76	--	0.447	0.927864
	Hippocampal_Volume	Cross-Sectional	rs62098462	18	34504364	DTNA	t	c	846	-0.693	--	0.4886	0.932778
	Hippocampal_Volume	Cross-Sectional	rs75127284	18	34506592	DTNA	a	c	846	0.143	++	0.8859	0.96677
	Hippocampal_Volume	Cross-Sectional	rs2439861	18	34507940	DTNA	a	g	846	0.706	++	0.4803	0.932778
	Hippocampal_Volume	Cross-Sectional	rs35982920	18	34516411	DTNA	a	g	846	1.591	++	0.1115	0.658171
	Hippocampal_Volume	Cross-Sectional	rs2509597	18	34528430	DTNA	a	t	846	2.121	++	0.03396	0.658171
	Hippocampal_Volume	Cross-Sectional	rs71363449	18	34531997	DTNA	t	c	846	-0.429	-+	0.6681	0.950472
	Hippocampal_Volume	Cross-Sectional	rs2439853	18	34533937	DTNA	a	g	846	-0.889	--	0.3742	0.836805
	Hippocampal_Volume	Cross-Sectional	rs2439000	18	34536414	DTNA	c	g	846	0.587	++	0.5572	0.932778
	Hippocampal_Volume	Cross-Sectional	rs11875892	18	34544032	DTNA	a	g	846	2.234	++	0.02547	0.658171
	Hippocampal_Volume	Cross-Sectional	rs1967583	18	34544573	DTNA	t	c	846	-1.575	--	0.1153	0.658171
	Hippocampal_Volume	Cross-Sectional	rs28856895	18	34555507	DTNA	a	g	846	0.367	+-	0.7133	0.966571
	Hippocampal_Volume	Cross-Sectional	rs77973497	18	34560529	DTNA	a	c	846	-0.811	--	0.4175	0.88776
	Hippocampal_Volume	Cross-Sectional	rs2579796	18	34569243	DTNA	a	g	846	-1.094	--	0.274	0.744279
	Hippocampal_Volume	Cross-Sectional	rs2579797	18	34571732	DTNA	t	g	846	-0.745	--	0.456	0.932418
	Hippocampal_Volume	Cross-Sectional	rs2685557	18	34576782	DTNA	t	c	846	-1.373	--	0.1696	0.738994
	Hippocampal_Volume	Cross-Sectional	rs9958492	18	34577783	DTNA	t	c	846	-1.237	--	0.216	0.744279
	Hippocampal_Volume	Cross-Sectional	rs2579802	18	34579787	DTNA	a	c	846	-0.956	--	0.3389	0.836805
	Hippocampal_Volume	Cross-Sectional	rs74920018	18	34607557	DTNA	a	t	846	0.071	+-	0.9434	0.96677
	Hippocampal_Volume	Cross-Sectional	rs1439127	18	34607759	DTNA	a	t	846	-0.515	+-	0.6063	0.932778
	Hippocampal_Volume	Cross-Sectional	rs12327368	18	34611361	DTNA	a	g	846	-1.366	--	0.172	0.738994
	Hippocampal_Volume	Cross-Sectional	rs62097188	18	34611412	DTNA	a	g	846	-1.282	--	0.2	0.744279
	Hippocampal_Volume	Cross-Sectional	rs9807153	18	34635520	DTNA	a	t	846	1.924	++	0.05437	0.658171
	Hippocampal_Volume	Cross-Sectional	rs2730126	18	34635939	DTNA	a	c	846	-1.81	--	0.07024	0.658171
	Hippocampal_Volume	Cross-Sectional	rs1659526	18	34644451	DTNA	a	g	846	-0.88	--	0.3787	0.836805
	Hippocampal_Volume	Cross-Sectional	rs17642885	18	34649976	DTNA	t	c	846	0.308	-+	0.758	0.966571
	Hippocampal_Volume	Cross-Sectional	rs1240974	18	34650949	DTNA	t	c	846	-1.594	--	0.1109	0.658171
	Hippocampal_Volume	Cross-Sectional	rs55869511	18	34651262	DTNA	a	c	846	1.582	++	0.1137	0.658171
	Hippocampal_Volume	Cross-Sectional	rs12955208	18	34656737	DTNA	a	g	846	0.517	+-	0.605	0.932778
	Hippocampal_Volume	Cross-Sectional	rs72953203	18	34660068	DTNA	a	g	846	1.849	++	0.06441	0.658171
	Hippocampal_Volume	Cross-Sectional	rs9946070	18	34665505	DTNA	a	g	846	-0.934	--	0.3502	0.836805
	Hippocampal_Volume	Cross-Sectional	rs72953211	18	34673381	DTNA	a	c	846	-0.198	-+	0.8432	0.96677
	Hippocampal_Volume	Cross-Sectional	rs55971592	18	34697328	DTNA	a	g	846	1.634	++	0.1023	0.658171
	Hippocampal_Volume	Cross-Sectional	rs78837792	18	34703359	DTNA	t	c	846	-1.892	--	0.05845	0.658171
	Hippocampal_Volume	Cross-Sectional	rs11663468	18	34707936	DTNA	t	c	846	-0.123	+-	0.9022	0.96677
	Hippocampal_Volume	Cross-Sectional	rs12963825	18	34709484	DTNA	a	g	846	-2.623	--	0.008726	0.658171
	Hippocampal_Volume	Cross-Sectional	rs1480432	18	34727166	DTNA	t	g	846	-0.607	--	0.5437	0.932778
	Hippocampal_Volume	Cross-Sectional	rs45556134	18	34729425	DTNA	a	g	846	0.642	-+	0.5208	0.932778
	Hippocampal_Volume	Cross-Sectional	rs899828	18	34732688	DTNA	t	g	846	-1.454	--	0.1461	0.73295
	Hippocampal_Volume	Cross-Sectional	rs17556884	18	34736455	DTNA	t	c	846	1.304	++	0.1921	0.744279
	Hippocampal_Volume	Cross-Sectional	rs1480428	18	34738732	DTNA	a	g	846	1.192	++	0.2331	0.744279
	Hippocampal_Volume	Cross-Sectional	rs12957349	18	34739291	DTNA	t	c	846	0.388	+-	0.698	0.965919
	Hippocampal_Volume	Cross-Sectional	rs12608110	18	34752198	DTNA	a	g	846	0.27	+-	0.7871	0.966571
	Hippocampal_Volume	Cross-Sectional	rs7228547	18	34760039	DTNA	a	g	846	0.297	++	0.7667	0.966571
	Hippocampal_Volume	Cross-Sectional	rs8099437	18	34761448	DTNA	t	g	846	1.248	++	0.2119	0.744279
	Hippocampal_Volume	Cross-Sectional	rs72955132	18	34762382	DTNA	a	g	846	1.243	++	0.2139	0.744279
	Hippocampal_Volume	Cross-Sectional	rs1817452	18	34776629	DTNA	t	c	846	0.899	++	0.3685	0.836805
	Hippocampal_Volume	Cross-Sectional	rs56404226	18	34778060	DTNA	a	g	846	-0.91	--	0.3628	0.836805
	Hippocampal_Volume	Cross-Sectional	rs72955175	18	34779045	DTNA	a	t	846	-0.293	+-	0.7697	0.966571
	Hippocampal_Volume	Cross-Sectional	rs12608251	18	34782906	DTNA	t	g	846	0.487	++	0.6261	0.932778
	Hippocampal_Volume	Cross-Sectional	rs76880720	18	34791141	DTNA	a	c	846	-0.285	-+	0.7753	0.966571
	Hippocampal_Volume	Cross-Sectional	rs9989533	18	34793909	DTNA	t	c	846	0.428	++	0.6687	0.950472
	Hippocampal_Volume	Cross-Sectional	rs79500711	18	34794379	DTNA	a	g	846	1.475	++	0.1403	0.73295
	Hippocampal_Volume	Cross-Sectional	rs138856611	18	34801684	DTNA	t	g	846	-0.576	--	0.5648	0.932778
	Hippocampal_Volume	Cross-Sectional	rs62097226	18	34804223	DTNA	a	t	846	-1.908	--	0.05637	0.658171
	Hippocampal_Volume	Cross-Sectional	rs4458079	18	34806161	DTNA	t	c	846	-2.008	--	0.04467	0.658171
	Hippocampal_Volume	Cross-Sectional	rs8086358	18	34813672	DTNA	t	g	846	-0.209	--	0.8346	0.96677
	Hippocampal_Volume	Cross-Sectional	rs72963047	18	34818804	DTNA	a	c	846	-2.09	--	0.03661	0.658171
	Hippocampal_Volume	Cross-Sectional	rs17557660	18	34831178	DTNA	a	t	846	-0.804	--	0.4212	0.88776
	Hippocampal_Volume	Cross-Sectional	rs1790533	18	34831631	DTNA	a	g	846	0.089	+-	0.929	0.96677
	Hippocampal_Volume	Cross-Sectional	rs4799782	18	34841123	DTNA	a	g	846	0.351	++	0.7259	0.966571
	Hippocampal_Volume	Cross-Sectional	rs1786604	18	34846264	DTNA	a	g	846	0.22	+-	0.8261	0.96677
	Hippocampal_Volume	Cross-Sectional	rs7233779	18	34863262	DTNA	a	g	846	-2.041	--	0.04122	0.658171
	Hippocampal_Volume	Cross-Sectional	rs644982	18	34869793	DTNA	a	g	846	0.178	-+	0.859	0.96677
	Hippocampal_Volume	Cross-Sectional	rs11659517	18	34870978	DTNA	a	t	846	0.646	++	0.5185	0.932778
	Hippocampal_Volume	Cross-Sectional	rs524969	18	34872102	DTNA	a	t	846	-0.628	--	0.5299	0.932778
	Hippocampal_Volume	Cross-Sectional	rs637914	18	34876135	DTNA	a	t	846	-0.66	--	0.5095	0.932778
	Hippocampal_Volume	Cross-Sectional	rs9304141	18	34879143	DTNA	t	c	846	-0.486	-+	0.6267	0.932778
	Hippocampal_Volume	Cross-Sectional	rs2288085	18	34879740	DTNA	a	g	846	-0.574	--	0.5658	0.932778
	Hippocampal_Volume	Cross-Sectional	rs17558116	18	34882719	DTNA	t	c	846	-0.047	+-	0.9622	0.976455
	Hippocampal_Volume	Cross-Sectional	rs10502637	18	34890006	DTNA	t	c	846	-1.075	--	0.2825	0.744279
	Hippocampal_Volume	Cross-Sectional	rs149163416	18	34898841	DTNA	a	g	846	0.373	+-	0.7094	0.966571
	Hippocampal_Volume	Cross-Sectional	20:33413780	20	33413780	SNTA1	a	t	846	1.44	++	0.1498	0.73295
	Hippocampal_Volume	Cross-Sectional	rs291683	20	33431611	SNTA1	t	c	846	-1.114	--	0.2652	0.744279
	Hippocampal_Volume	Cross-Sectional	20:33433270	20	33433270	SNTA1	t	c	846	0.934	++	0.3502	0.836805
	Hippocampal_Volume	Cross-Sectional	rs6141396	20	33436147	SNTA1	a	c	328	-1.341	-?	0.1799	0.738994
	Hippocampal_Volume	Cross-Sectional	rs293721	20	33441633	SNTA1	t	c	846	0.068	++	0.9456	0.96677
	Hippocampal_Volume	Longitudinal	rs111599092	3	49465346	DAG1	a	g	309	0.379	+-	0.7049	0.913292
	Hippocampal_Volume	Longitudinal	rs73073015	3	49465733	DAG1	a	g	309	1.687	++	0.0916	0.686712
	Hippocampal_Volume	Longitudinal	rs7611164	3	49471395	DAG1	t	g	309	0.389	-+	0.6971	0.913292
	Hippocampal_Volume	Longitudinal	rs1568661	3	49483525	DAG1	a	g	309	-0.408	-+	0.6835	0.913292
	Hippocampal_Volume	Longitudinal	rs7374731	3	49495661	DAG1	c	g	309	-1.42	-+	0.1557	0.688094
	Hippocampal_Volume	Longitudinal	rs73074811	3	49516098	DAG1	a	t	309	0.009	-+	0.9932	0.9985
	Hippocampal_Volume	Longitudinal	rs3870338	3	49519618	DAG1	a	g	309	-0.408	-+	0.6835	0.913292
	Hippocampal_Volume	Longitudinal	rs55935606	3	49528072	DAG1	a	g	309	1.035	++	0.3007	0.764746
	Hippocampal_Volume	Longitudinal	rs75153130	3	49530436	DAG1	a	c	309	-0.389	+-	0.6971	0.913292
	Hippocampal_Volume	Longitudinal	rs13079082	3	49537375	DAG1	c	g	309	-0.814	--	0.4155	0.801739
	Hippocampal_Volume	Longitudinal	rs4052546	3	49538116	DAG1	c	g	309	1.42	+-	0.1557	0.688094
	Hippocampal_Volume	Longitudinal	rs73074830	3	49539584	DAG1	a	c	309	-0.08	-+	0.9363	0.975481
	Hippocampal_Volume	Longitudinal	rs114093899	3	49539955	DAG1	c	g	309	-0.347	+-	0.7287	0.913292
	Hippocampal_Volume	Longitudinal	rs9789109	18	26842291	AQP4	a	g	309	-0.239	--	0.811	0.949632
	Hippocampal_Volume	Longitudinal	rs10164026	18	26842362	AQP4	a	c	309	0.392	-+	0.6947	0.913292
	Hippocampal_Volume	Longitudinal	rs4800270	18	26844933	AQP4	t	g	309	-0.758	--	0.4487	0.812635
	Hippocampal_Volume	Longitudinal	rs79668602	18	26845488	AQP4	a	g	309	-1.012	--	0.3115	0.764746
	Hippocampal_Volume	Longitudinal	rs12458416	18	26847267	AQP4	c	g	309	0.524	-+	0.6006	0.913292
	Hippocampal_Volume	Longitudinal	rs12953446	18	26848521	AQP4	a	g	309	-0.24	--	0.8102	0.949632
	Hippocampal_Volume	Longitudinal	rs67461489	18	26848876	AQP4	t	c	309	0.273	-+	0.7847	0.949632
	Hippocampal_Volume	Longitudinal	rs11661081	18	26850068	AQP4	a	c	309	0.844	++	0.3987	0.791622
	Hippocampal_Volume	Longitudinal	rs3763043	18	26855854	AQP4	t	c	309	-0.889	--	0.374	0.764746
	Hippocampal_Volume	Longitudinal	rs68006382	18	26856555	AQP4	a	g	309	0.586	++	0.558	0.888907
	Hippocampal_Volume	Longitudinal	rs335930	18	26856961	AQP4	a	c	309	-0.031	+-	0.9754	0.98985
	Hippocampal_Volume	Longitudinal	rs71353405	18	26857429	AQP4	t	c	309	-0.547	--	0.5843	0.909649
	Hippocampal_Volume	Longitudinal	rs162009	18	26864250	AQP4	a	g	309	-0.122	-+	0.9027	0.959
	Hippocampal_Volume	Longitudinal	rs4800773	18	26865017	AQP4	a	g	309	-0.382	+-	0.7024	0.913292
	Hippocampal_Volume	Longitudinal	rs3875089	18	26865469	AQP4	t	c	309	0.185	-+	0.8533	0.950424
	Hippocampal_Volume	Longitudinal	rs72878787	18	26866517	AQP4	a	g	309	0.263	-+	0.7927	0.949632
	Hippocampal_Volume	Longitudinal	rs162006	18	26866570	AQP4	t	c	309	-0.077	-+	0.9388	0.975481
	Hippocampal_Volume	Longitudinal	rs151244	18	26866755	AQP4	t	c	309	0.732	-+	0.4642	0.812635
	Hippocampal_Volume	Longitudinal	rs72878794	18	26866839	AQP4	t	c	309	1.028	++	0.3041	0.764746
	Hippocampal_Volume	Longitudinal	rs9961118	18	26866901	AQP4	t	c	309	-0.647	--	0.5177	0.875616
	Hippocampal_Volume	Longitudinal	rs162004	18	26867972	AQP4	c	g	309	0.725	++	0.4686	0.812635
	Hippocampal_Volume	Longitudinal	rs72878799	18	26868165	AQP4	a	g	309	1.601	++	0.1093	0.686712
	Hippocampal_Volume	Longitudinal	rs11662318	18	26869056	AQP4	t	c	309	0.899	++	0.3689	0.764746
	Hippocampal_Volume	Longitudinal	rs151246	18	26869139	AQP4	t	g	309	0.066	++	0.947	0.975481
	Hippocampal_Volume	Longitudinal	rs491148	18	26869803	AQP4	a	g	309	-0.921	--	0.3573	0.764746
	Hippocampal_Volume	Longitudinal	rs162002	18	26871015	AQP4	a	g	309	-1.526	--	0.1271	0.688094
	Hippocampal_Volume	Longitudinal	rs162001	18	26871481	AQP4	a	c	309	1.257	++	0.2089	0.715483
	Hippocampal_Volume	Longitudinal	rs3865411	18	26871684	AQP4	a	g	309	-0.408	+-	0.6835	0.913292
	Hippocampal_Volume	Longitudinal	rs162000	18	26872471	AQP4	a	c	309	-0.574	--	0.5662	0.891602
	Hippocampal_Volume	Longitudinal	rs12969503	18	26873564	AQP4	t	g	309	-1.175	-+	0.24	0.764651
	Hippocampal_Volume	Longitudinal	rs8094228	18	26873767	AQP4	t	c	309	1.13	+-	0.2584	0.764746
	Hippocampal_Volume	Longitudinal	rs480647	18	26874290	AQP4	t	c	309	-0.341	-+	0.7333	0.913292
	Hippocampal_Volume	Longitudinal	rs10502478	18	26874616	AQP4	a	c	309	1.562	++	0.1183	0.686712
	Hippocampal_Volume	Longitudinal	rs7234562	18	34483685	DTNA	t	c	309	-0.249	-+	0.8032	0.949632
	Hippocampal_Volume	Longitudinal	rs79922046	18	34485536	DTNA	a	g	309	0.042	-+	0.9665	0.988138
	Hippocampal_Volume	Longitudinal	rs9955950	18	34485672	DTNA	t	c	309	-0.187	+-	0.8518	0.950424
	Hippocampal_Volume	Longitudinal	rs12957028	18	34485948	DTNA	a	g	309	-0.122	+-	0.903	0.959
	Hippocampal_Volume	Longitudinal	rs72639491	18	34491438	DTNA	a	g	309	-0.136	-+	0.8917	0.959
	Hippocampal_Volume	Longitudinal	rs62097347	18	34492032	DTNA	c	g	309	-0.9	-+	0.368	0.764746
	Hippocampal_Volume	Longitudinal	rs9961251	18	34492344	DTNA	t	c	309	-0.188	-+	0.8507	0.950424
	Hippocampal_Volume	Longitudinal	rs111846993	18	34494001	DTNA	t	c	309	1.266	++	0.2055	0.715483
	Hippocampal_Volume	Longitudinal	rs4799769	18	34494577	DTNA	c	g	309	1.576	++	0.1151	0.686712
	Hippocampal_Volume	Longitudinal	rs8092794	18	34496273	DTNA	a	g	309	-0.225	+-	0.8216	0.950424
	Hippocampal_Volume	Longitudinal	rs7243528	18	34497055	DTNA	t	c	309	0.208	-+	0.8349	0.950424
	Hippocampal_Volume	Longitudinal	rs79972565	18	34497194	DTNA	t	g	309	-0.212	-+	0.832	0.950424
	Hippocampal_Volume	Longitudinal	rs35839923	18	34497764	DTNA	a	g	309	0.269	++	0.7879	0.949632
	Hippocampal_Volume	Longitudinal	rs62097349	18	34499519	DTNA	a	g	309	0.149	++	0.8818	0.958783
	Hippocampal_Volume	Longitudinal	rs9965622	18	34502153	DTNA	t	c	309	0.406	+-	0.685	0.913292
	Hippocampal_Volume	Longitudinal	rs62098462	18	34504364	DTNA	t	c	309	0.165	-+	0.8689	0.958783
	Hippocampal_Volume	Longitudinal	rs75127284	18	34506592	DTNA	a	c	309	-1.439	+-	0.1501	0.688094
	Hippocampal_Volume	Longitudinal	rs2439861	18	34507940	DTNA	a	g	309	1.268	++	0.2047	0.715483
	Hippocampal_Volume	Longitudinal	rs35982920	18	34516411	DTNA	a	g	309	-1.191	--	0.2338	0.762633
	Hippocampal_Volume	Longitudinal	rs2509597	18	34528430	DTNA	a	t	309	0.363	-+	0.7166	0.913292
	Hippocampal_Volume	Longitudinal	rs71363449	18	34531997	DTNA	t	c	309	-1.109	--	0.2673	0.764746
	Hippocampal_Volume	Longitudinal	rs2439853	18	34533937	DTNA	a	g	309	-2.055	--	0.03992	0.686712
	Hippocampal_Volume	Longitudinal	rs2439000	18	34536414	DTNA	c	g	309	1.433	++	0.1519	0.688094
	Hippocampal_Volume	Longitudinal	rs11875892	18	34544032	DTNA	a	g	309	-2.049	--	0.04042	0.686712
	Hippocampal_Volume	Longitudinal	rs1967583	18	34544573	DTNA	t	c	309	1.285	++	0.1988	0.715483
	Hippocampal_Volume	Longitudinal	rs28856895	18	34555507	DTNA	a	g	309	-0.47	-+	0.638	0.913292
	Hippocampal_Volume	Longitudinal	rs77973497	18	34560529	DTNA	a	c	309	-0.352	+-	0.725	0.913292
	Hippocampal_Volume	Longitudinal	rs2579796	18	34569243	DTNA	a	g	309	-1.575	--	0.1152	0.686712
	Hippocampal_Volume	Longitudinal	rs2579797	18	34571732	DTNA	t	g	309	-1.011	--	0.3119	0.764746
	Hippocampal_Volume	Longitudinal	rs2685557	18	34576782	DTNA	t	c	309	-1.554	--	0.1203	0.686712
	Hippocampal_Volume	Longitudinal	rs9958492	18	34577783	DTNA	t	c	309	-0.925	--	0.3549	0.764746
	Hippocampal_Volume	Longitudinal	rs2579802	18	34579787	DTNA	a	c	309	-1.399	--	0.1619	0.693134
	Hippocampal_Volume	Longitudinal	rs74920018	18	34607557	DTNA	a	t	309	0.002	+-	0.9985	0.9985
	Hippocampal_Volume	Longitudinal	rs1439127	18	34607759	DTNA	a	t	309	0.155	+-	0.8766	0.958783
	Hippocampal_Volume	Longitudinal	rs12327368	18	34611361	DTNA	a	g	309	-0.956	--	0.3389	0.764746
	Hippocampal_Volume	Longitudinal	rs62097188	18	34611412	DTNA	a	g	309	0.688	-+	0.4912	0.84118
	Hippocampal_Volume	Longitudinal	rs9807153	18	34635520	DTNA	a	t	309	0.349	++	0.7274	0.913292
	Hippocampal_Volume	Longitudinal	rs2730126	18	34635939	DTNA	a	c	309	-1.764	--	0.07767	0.686712
	Hippocampal_Volume	Longitudinal	rs1659526	18	34644451	DTNA	a	g	309	-1.091	--	0.2751	0.764746
	Hippocampal_Volume	Longitudinal	rs17642885	18	34649976	DTNA	t	c	309	0.767	++	0.4432	0.812635
	Hippocampal_Volume	Longitudinal	rs1240974	18	34650949	DTNA	t	c	309	-1.301	--	0.1932	0.715483
	Hippocampal_Volume	Longitudinal	rs55869511	18	34651262	DTNA	a	c	309	0.586	++	0.5579	0.888907
	Hippocampal_Volume	Longitudinal	rs12955208	18	34656737	DTNA	a	g	309	2.022	++	0.04321	0.686712
	Hippocampal_Volume	Longitudinal	rs72953203	18	34660068	DTNA	a	g	309	-0.772	--	0.4399	0.812635
	Hippocampal_Volume	Longitudinal	rs9946070	18	34665505	DTNA	a	g	309	-1.131	-+	0.2579	0.764746
	Hippocampal_Volume	Longitudinal	rs72953211	18	34673381	DTNA	a	c	309	0.591	+-	0.5546	0.888907
	Hippocampal_Volume	Longitudinal	rs55971592	18	34697328	DTNA	a	g	309	-1.654	--	0.09814	0.686712
	Hippocampal_Volume	Longitudinal	rs78837792	18	34703359	DTNA	t	c	309	0.453	++	0.6508	0.913292
	Hippocampal_Volume	Longitudinal	rs11663468	18	34707936	DTNA	t	c	309	-0.921	-+	0.357	0.764746
	Hippocampal_Volume	Longitudinal	rs12963825	18	34709484	DTNA	a	g	309	-0.283	+-	0.7774	0.949632
	Hippocampal_Volume	Longitudinal	rs1480432	18	34727166	DTNA	t	g	309	0.964	++	0.3353	0.764746
	Hippocampal_Volume	Longitudinal	rs45556134	18	34729425	DTNA	a	g	309	2.06	++	0.03943	0.686712
	Hippocampal_Volume	Longitudinal	rs899828	18	34732688	DTNA	t	g	309	0.727	++	0.467	0.812635
	Hippocampal_Volume	Longitudinal	rs17556884	18	34736455	DTNA	t	c	309	0.599	++	0.5493	0.888907
	Hippocampal_Volume	Longitudinal	rs1480428	18	34738732	DTNA	a	g	309	1.326	+-	0.1849	0.715483
	Hippocampal_Volume	Longitudinal	rs12957349	18	34739291	DTNA	t	c	309	2.615	++	0.008934	0.30599
	Hippocampal_Volume	Longitudinal	rs12608110	18	34752198	DTNA	a	g	309	0.509	-+	0.6108	0.913292
	Hippocampal_Volume	Longitudinal	rs7228547	18	34760039	DTNA	a	g	309	0.939	+-	0.3477	0.764746
	Hippocampal_Volume	Longitudinal	rs8099437	18	34761448	DTNA	t	g	309	1.326	+-	0.1849	0.715483
	Hippocampal_Volume	Longitudinal	rs72955132	18	34762382	DTNA	a	g	309	0.776	++	0.4375	0.812635
	Hippocampal_Volume	Longitudinal	rs1817452	18	34776629	DTNA	t	c	309	2.885	++	0.003912	0.178648
	Hippocampal_Volume	Longitudinal	rs56404226	18	34778060	DTNA	a	g	309	-0.99	--	0.3221	0.764746
	Hippocampal_Volume	Longitudinal	rs72955175	18	34779045	DTNA	a	t	309	1.344	+-	0.1788	0.715483
	Hippocampal_Volume	Longitudinal	rs12608251	18	34782906	DTNA	t	g	309	1.556	++	0.1196	0.686712
	Hippocampal_Volume	Longitudinal	rs76880720	18	34791141	DTNA	a	c	309	-3.049	--	0.002298	0.178648
	Hippocampal_Volume	Longitudinal	rs9989533	18	34793909	DTNA	t	c	309	1.044	++	0.2964	0.764746
	Hippocampal_Volume	Longitudinal	rs79500711	18	34794379	DTNA	a	g	309	1.476	++	0.1401	0.688094
	Hippocampal_Volume	Longitudinal	rs138856611	18	34801684	DTNA	t	g	309	1.694	++	0.09029	0.686712
	Hippocampal_Volume	Longitudinal	rs62097226	18	34804223	DTNA	a	t	309	0.346	+-	0.7293	0.913292
	Hippocampal_Volume	Longitudinal	rs4458079	18	34806161	DTNA	t	c	309	-0.971	--	0.3317	0.764746
	Hippocampal_Volume	Longitudinal	rs8086358	18	34813672	DTNA	t	g	309	-1.138	-+	0.2551	0.764746
	Hippocampal_Volume	Longitudinal	rs72963047	18	34818804	DTNA	a	c	309	0.848	++	0.3964	0.791622
	Hippocampal_Volume	Longitudinal	rs17557660	18	34831178	DTNA	a	t	309	1.9	++	0.05739	0.686712
	Hippocampal_Volume	Longitudinal	rs1790533	18	34831631	DTNA	a	g	309	1.754	++	0.07947	0.686712
	Hippocampal_Volume	Longitudinal	rs4799782	18	34841123	DTNA	a	g	309	-1.793	--	0.07302	0.686712
	Hippocampal_Volume	Longitudinal	rs1786604	18	34846264	DTNA	a	g	309	1.014	+-	0.3106	0.764746
	Hippocampal_Volume	Longitudinal	rs7233779	18	34863262	DTNA	a	g	309	0.978	++	0.3282	0.764746
	Hippocampal_Volume	Longitudinal	rs644982	18	34869793	DTNA	a	g	309	-0.731	-+	0.4645	0.812635
	Hippocampal_Volume	Longitudinal	rs11659517	18	34870978	DTNA	a	t	309	2.894	++	0.0038	0.178648
	Hippocampal_Volume	Longitudinal	rs524969	18	34872102	DTNA	a	t	309	-1.697	--	0.08971	0.686712
	Hippocampal_Volume	Longitudinal	rs637914	18	34876135	DTNA	a	t	309	-0.407	--	0.6839	0.913292
	Hippocampal_Volume	Longitudinal	rs9304141	18	34879143	DTNA	t	c	309	-1.677	--	0.09348	0.686712
	Hippocampal_Volume	Longitudinal	rs2288085	18	34879740	DTNA	a	g	309	-0.614	-+	0.5389	0.888907
	Hippocampal_Volume	Longitudinal	rs17558116	18	34882719	DTNA	t	c	309	1.96	++	0.05003	0.686712
	Hippocampal_Volume	Longitudinal	rs10502637	18	34890006	DTNA	t	c	309	0.381	+-	0.7034	0.913292
	Hippocampal_Volume	Longitudinal	rs149163416	18	34898841	DTNA	a	g	309	0.92	++	0.3576	0.764746
	Hippocampal_Volume	Longitudinal	20:33413780	20	33413780	SNTA1	a	t	309	0.381	-+	0.7032	0.913292
	Hippocampal_Volume	Longitudinal	rs291683	20	33431611	SNTA1	t	c	309	0.821	+-	0.4116	0.801739
	Hippocampal_Volume	Longitudinal	20:33433270	20	33433270	SNTA1	t	c	309	-1.229	-+	0.219	0.73178
	Hippocampal_Volume	Longitudinal	rs6141396	20	33436147	SNTA1	a	c	169	-1.443	-?	0.1491	0.688094
	Hippocampal_Volume	Longitudinal	rs293721	20	33441633	SNTA1	t	c	309	0.073	+-	0.942	0.975481
	PACC	Cross-Sectional	rs111599092	3	49465346	DAG1	a	g	964	-0.251	+-	0.8016	0.9876
	PACC	Cross-Sectional	rs73073015	3	49465733	DAG1	a	g	964	0.197	-+	0.844	0.9876
	PACC	Cross-Sectional	rs7611164	3	49471395	DAG1	t	g	964	0.77	-+	0.4413	0.922404
	PACC	Cross-Sectional	rs1568661	3	49483525	DAG1	a	g	964	-1.326	-+	0.1849	0.868808
	PACC	Cross-Sectional	rs7374731	3	49495661	DAG1	c	g	964	0.255	-+	0.799	0.9876
	PACC	Cross-Sectional	rs73074811	3	49516098	DAG1	a	t	964	-0.912	+-	0.3619	0.922404
	PACC	Cross-Sectional	rs3870338	3	49519618	DAG1	a	g	964	-1.271	-+	0.2037	0.868808
	PACC	Cross-Sectional	rs55935606	3	49528072	DAG1	a	g	964	-1.104	+-	0.2696	0.8768
	PACC	Cross-Sectional	rs75153130	3	49530436	DAG1	a	c	964	-0.77	+-	0.4413	0.922404
	PACC	Cross-Sectional	rs13079082	3	49537375	DAG1	c	g	964	1.594	++	0.1109	0.660578
	PACC	Cross-Sectional	rs4052546	3	49538116	DAG1	c	g	964	-0.255	+-	0.799	0.9876
	PACC	Cross-Sectional	rs73074830	3	49539584	DAG1	a	c	964	0.795	-+	0.4267	0.922404
	PACC	Cross-Sectional	rs114093899	3	49539955	DAG1	c	g	964	0.892	++	0.3723	0.922404
	PACC	Cross-Sectional	rs9789109	18	26842291	AQP4	a	g	964	0.022	-+	0.9823	0.9876
	PACC	Cross-Sectional	rs10164026	18	26842362	AQP4	a	c	964	3.19	++	0.001423	0.0974755
	PACC	Cross-Sectional	rs4800270	18	26844933	AQP4	t	g	964	-0.655	-+	0.5127	0.949188
	PACC	Cross-Sectional	rs79668602	18	26845488	AQP4	a	g	964	0.048	+-	0.9617	0.9876
	PACC	Cross-Sectional	rs12458416	18	26847267	AQP4	c	g	964	2.51	++	0.01208	0.20687
	PACC	Cross-Sectional	rs12953446	18	26848521	AQP4	a	g	964	-0.244	-+	0.8074	0.9876
	PACC	Cross-Sectional	rs67461489	18	26848876	AQP4	t	c	964	-0.718	+-	0.4725	0.922404
	PACC	Cross-Sectional	rs11661081	18	26850068	AQP4	a	c	964	0.429	+-	0.6681	0.9876
	PACC	Cross-Sectional	rs3763043	18	26855854	AQP4	t	c	964	-1.872	--	0.06122	0.524196
	PACC	Cross-Sectional	rs68006382	18	26856555	AQP4	a	g	964	0.493	-+	0.6218	0.9876
	PACC	Cross-Sectional	rs335930	18	26856961	AQP4	a	c	964	-0.891	+-	0.3728	0.922404
	PACC	Cross-Sectional	rs71353405	18	26857429	AQP4	t	c	964	0.262	+-	0.7936	0.9876
	PACC	Cross-Sectional	rs162009	18	26864250	AQP4	a	g	964	1.698	-+	0.08947	0.647119
	PACC	Cross-Sectional	rs4800773	18	26865017	AQP4	a	g	964	-1.618	-+	0.1057	0.660578
	PACC	Cross-Sectional	rs3875089	18	26865469	AQP4	t	c	964	-0.309	+-	0.7574	0.9876
	PACC	Cross-Sectional	rs72878787	18	26866517	AQP4	a	g	964	-0.691	-+	0.4895	0.922404
	PACC	Cross-Sectional	rs162006	18	26866570	AQP4	t	c	964	2.223	++	0.02623	0.326683
	PACC	Cross-Sectional	rs151244	18	26866755	AQP4	t	c	964	-3	--	0.002703	0.100661
	PACC	Cross-Sectional	rs72878794	18	26866839	AQP4	t	c	964	-1.221	--	0.2219	0.868808
	PACC	Cross-Sectional	rs9961118	18	26866901	AQP4	t	c	964	-0.16	+-	0.8725	0.9876
	PACC	Cross-Sectional	rs162004	18	26867972	AQP4	c	g	964	0.729	++	0.4659	0.922404
	PACC	Cross-Sectional	rs72878799	18	26868165	AQP4	a	g	964	1.597	++	0.1102	0.660578
	PACC	Cross-Sectional	rs11662318	18	26869056	AQP4	t	c	964	1.288	-+	0.1978	0.868808
	PACC	Cross-Sectional	rs151246	18	26869139	AQP4	t	g	964	-0.341	+-	0.7332	0.9876
	PACC	Cross-Sectional	rs491148	18	26869803	AQP4	a	g	964	-0.935	+-	0.35	0.922404
	PACC	Cross-Sectional	rs162002	18	26871015	AQP4	a	g	964	-2.697	--	0.006995	0.161751
	PACC	Cross-Sectional	rs162001	18	26871481	AQP4	a	c	964	1.105	++	0.2691	0.8768
	PACC	Cross-Sectional	rs3865411	18	26871684	AQP4	a	g	964	-0.978	--	0.328	0.922404
	PACC	Cross-Sectional	rs162000	18	26872471	AQP4	a	c	964	-0.727	--	0.4675	0.922404
	PACC	Cross-Sectional	rs12969503	18	26873564	AQP4	t	g	964	-2.693	--	0.007084	0.161751
	PACC	Cross-Sectional	rs8094228	18	26873767	AQP4	t	c	964	2.974	++	0.002939	0.100661
	PACC	Cross-Sectional	rs480647	18	26874290	AQP4	t	c	964	-2.3	--	0.02145	0.293865
	PACC	Cross-Sectional	rs10502478	18	26874616	AQP4	a	c	964	3.702	++	0.0002142	0.0293454
	PACC	Cross-Sectional	rs7234562	18	34483685	DTNA	t	c	964	-0.136	-+	0.892	0.9876
	PACC	Cross-Sectional	rs79922046	18	34485536	DTNA	a	g	964	0.127	-+	0.8988	0.9876
	PACC	Cross-Sectional	rs9955950	18	34485672	DTNA	t	c	964	0.824	-+	0.4097	0.922404
	PACC	Cross-Sectional	rs12957028	18	34485948	DTNA	a	g	964	-0.132	+-	0.8948	0.9876
	PACC	Cross-Sectional	rs72639491	18	34491438	DTNA	a	g	964	-0.046	--	0.9634	0.9876
	PACC	Cross-Sectional	rs62097347	18	34492032	DTNA	c	g	964	-1.22	--	0.2226	0.868808
	PACC	Cross-Sectional	rs9961251	18	34492344	DTNA	t	c	964	-1.329	--	0.1838	0.868808
	PACC	Cross-Sectional	rs111846993	18	34494001	DTNA	t	c	964	0.016	-+	0.9876	0.9876
	PACC	Cross-Sectional	rs4799769	18	34494577	DTNA	c	g	964	-0.046	+-	0.9636	0.9876
	PACC	Cross-Sectional	rs8092794	18	34496273	DTNA	a	g	964	0.394	-+	0.6934	0.9876
	PACC	Cross-Sectional	rs7243528	18	34497055	DTNA	t	c	964	-0.552	--	0.581	0.9876
	PACC	Cross-Sectional	rs79972565	18	34497194	DTNA	t	g	964	-0.021	+-	0.9831	0.9876
	PACC	Cross-Sectional	rs35839923	18	34497764	DTNA	a	g	964	-0.264	+-	0.7921	0.9876
	PACC	Cross-Sectional	rs62097349	18	34499519	DTNA	a	g	964	0.274	+-	0.7844	0.9876
	PACC	Cross-Sectional	rs9965622	18	34502153	DTNA	t	c	964	-0.579	--	0.5628	0.9876
	PACC	Cross-Sectional	rs62098462	18	34504364	DTNA	t	c	964	0.393	++	0.6947	0.9876
	PACC	Cross-Sectional	rs75127284	18	34506592	DTNA	a	c	964	-0.095	-+	0.9241	0.9876
	PACC	Cross-Sectional	rs2439861	18	34507940	DTNA	a	g	964	-0.104	-+	0.9168	0.9876
	PACC	Cross-Sectional	rs35982920	18	34516411	DTNA	a	g	964	0.724	++	0.4693	0.922404
	PACC	Cross-Sectional	rs2509597	18	34528430	DTNA	a	t	964	-0.394	-+	0.6939	0.9876
	PACC	Cross-Sectional	rs71363449	18	34531997	DTNA	t	c	964	0.422	++	0.6731	0.9876
	PACC	Cross-Sectional	rs2439853	18	34533937	DTNA	a	g	964	-0.528	+-	0.5972	0.9876
	PACC	Cross-Sectional	rs2439000	18	34536414	DTNA	c	g	964	0.693	-+	0.4882	0.922404
	PACC	Cross-Sectional	rs11875892	18	34544032	DTNA	a	g	964	1.314	++	0.1887	0.868808
	PACC	Cross-Sectional	rs1967583	18	34544573	DTNA	t	c	964	2.148	++	0.03168	0.36168
	PACC	Cross-Sectional	rs28856895	18	34555507	DTNA	a	g	964	0.941	++	0.3468	0.922404
	PACC	Cross-Sectional	rs77973497	18	34560529	DTNA	a	c	964	-0.453	--	0.6505	0.9876
	PACC	Cross-Sectional	rs2579796	18	34569243	DTNA	a	g	964	-0.025	+-	0.9799	0.9876
	PACC	Cross-Sectional	rs2579797	18	34571732	DTNA	t	g	964	-0.892	+-	0.3726	0.922404
	PACC	Cross-Sectional	rs2685557	18	34576782	DTNA	t	c	964	0.087	+-	0.9307	0.9876
	PACC	Cross-Sectional	rs9958492	18	34577783	DTNA	t	c	964	0.742	++	0.4584	0.922404
	PACC	Cross-Sectional	rs2579802	18	34579787	DTNA	a	c	964	-0.896	+-	0.3701	0.922404
	PACC	Cross-Sectional	rs74920018	18	34607557	DTNA	a	t	964	-0.065	--	0.948	0.9876
	PACC	Cross-Sectional	rs1439127	18	34607759	DTNA	a	t	964	1.091	++	0.2752	0.8768
	PACC	Cross-Sectional	rs12327368	18	34611361	DTNA	a	g	964	0.914	++	0.3606	0.922404
	PACC	Cross-Sectional	rs62097188	18	34611412	DTNA	a	g	964	1.672	++	0.09447	0.647119
	PACC	Cross-Sectional	rs9807153	18	34635520	DTNA	a	t	964	-0.791	--	0.4289	0.922404
	PACC	Cross-Sectional	rs2730126	18	34635939	DTNA	a	c	964	-0.462	+-	0.6438	0.9876
	PACC	Cross-Sectional	rs1659526	18	34644451	DTNA	a	g	964	-0.919	+-	0.358	0.922404
	PACC	Cross-Sectional	rs17642885	18	34649976	DTNA	t	c	964	-1.138	--	0.2551	0.8768
	PACC	Cross-Sectional	rs1240974	18	34650949	DTNA	t	c	964	-1.484	+-	0.1378	0.755144
	PACC	Cross-Sectional	rs55869511	18	34651262	DTNA	a	c	964	-0.243	+-	0.8082	0.9876
	PACC	Cross-Sectional	rs12955208	18	34656737	DTNA	a	g	964	0.032	+-	0.9748	0.9876
	PACC	Cross-Sectional	rs72953203	18	34660068	DTNA	a	g	964	-0.819	--	0.4129	0.922404
	PACC	Cross-Sectional	rs9946070	18	34665505	DTNA	a	g	964	-0.063	+-	0.9494	0.9876
	PACC	Cross-Sectional	rs72953211	18	34673381	DTNA	a	c	964	0.591	-+	0.5547	0.986934
	PACC	Cross-Sectional	rs55971592	18	34697328	DTNA	a	g	964	-1.673	--	0.09435	0.647119
	PACC	Cross-Sectional	rs78837792	18	34703359	DTNA	t	c	964	1.228	++	0.2194	0.868808
	PACC	Cross-Sectional	rs11663468	18	34707936	DTNA	t	c	964	-0.44	+-	0.6601	0.9876
	PACC	Cross-Sectional	rs12963825	18	34709484	DTNA	a	g	964	-0.37	--	0.7114	0.9876
	PACC	Cross-Sectional	rs1480432	18	34727166	DTNA	t	g	964	0.126	+-	0.8996	0.9876
	PACC	Cross-Sectional	rs45556134	18	34729425	DTNA	a	g	964	1.132	++	0.2578	0.8768
	PACC	Cross-Sectional	rs899828	18	34732688	DTNA	t	g	964	-1.79	--	0.0735	0.592324
	PACC	Cross-Sectional	rs17556884	18	34736455	DTNA	t	c	964	-0.466	--	0.6414	0.9876
	PACC	Cross-Sectional	rs1480428	18	34738732	DTNA	a	g	964	0.06	-+	0.9519	0.9876
	PACC	Cross-Sectional	rs12957349	18	34739291	DTNA	t	c	964	0.235	+-	0.8138	0.9876
	PACC	Cross-Sectional	rs12608110	18	34752198	DTNA	a	g	964	-0.036	-+	0.9711	0.9876
	PACC	Cross-Sectional	rs7228547	18	34760039	DTNA	a	g	964	0.287	-+	0.7742	0.9876
	PACC	Cross-Sectional	rs8099437	18	34761448	DTNA	t	g	964	-0.089	-+	0.9295	0.9876
	PACC	Cross-Sectional	rs72955132	18	34762382	DTNA	a	g	964	-0.115	--	0.9083	0.9876
	PACC	Cross-Sectional	rs1817452	18	34776629	DTNA	t	c	964	0.477	+-	0.6333	0.9876
	PACC	Cross-Sectional	rs56404226	18	34778060	DTNA	a	g	964	-0.047	+-	0.9622	0.9876
	PACC	Cross-Sectional	rs72955175	18	34779045	DTNA	a	t	964	0.068	-+	0.946	0.9876
	PACC	Cross-Sectional	rs12608251	18	34782906	DTNA	t	g	964	0.452	+-	0.6515	0.9876
	PACC	Cross-Sectional	rs76880720	18	34791141	DTNA	a	c	964	-0.631	--	0.5277	0.951249
	PACC	Cross-Sectional	rs9989533	18	34793909	DTNA	t	c	964	0.688	-+	0.4915	0.922404
	PACC	Cross-Sectional	rs79500711	18	34794379	DTNA	a	g	964	-0.954	--	0.3403	0.922404
	PACC	Cross-Sectional	rs138856611	18	34801684	DTNA	t	g	964	2.514	++	0.01193	0.20687
	PACC	Cross-Sectional	rs62097226	18	34804223	DTNA	a	t	964	-0.18	+-	0.857	0.9876
	PACC	Cross-Sectional	rs4458079	18	34806161	DTNA	t	c	964	1.151	-+	0.2498	0.8768
	PACC	Cross-Sectional	rs8086358	18	34813672	DTNA	t	g	964	1.224	++	0.2211	0.868808
	PACC	Cross-Sectional	rs72963047	18	34818804	DTNA	a	c	964	1.913	++	0.05569	0.519869
	PACC	Cross-Sectional	rs17557660	18	34831178	DTNA	a	t	964	0.046	-+	0.9633	0.9876
	PACC	Cross-Sectional	rs1790533	18	34831631	DTNA	a	g	964	0.728	+-	0.4663	0.922404
	PACC	Cross-Sectional	rs4799782	18	34841123	DTNA	a	g	964	-2.421	--	0.01547	0.235488
	PACC	Cross-Sectional	rs1786604	18	34846264	DTNA	a	g	964	-0.133	-+	0.8943	0.9876
	PACC	Cross-Sectional	rs7233779	18	34863262	DTNA	a	g	964	1.943	++	0.05202	0.519869
	PACC	Cross-Sectional	rs644982	18	34869793	DTNA	a	g	964	1.37	++	0.1708	0.868808
	PACC	Cross-Sectional	rs11659517	18	34870978	DTNA	a	t	964	0.727	+-	0.4673	0.922404
	PACC	Cross-Sectional	rs524969	18	34872102	DTNA	a	t	964	-1.559	--	0.1189	0.678721
	PACC	Cross-Sectional	rs637914	18	34876135	DTNA	a	t	964	-0.097	-+	0.9225	0.9876
	PACC	Cross-Sectional	rs9304141	18	34879143	DTNA	t	c	964	0.937	++	0.3489	0.922404
	PACC	Cross-Sectional	rs2288085	18	34879740	DTNA	a	g	964	1.904	++	0.05692	0.519869
	PACC	Cross-Sectional	rs17558116	18	34882719	DTNA	t	c	964	0.695	+-	0.4873	0.922404
	PACC	Cross-Sectional	rs10502637	18	34890006	DTNA	t	c	964	1.205	++	0.2283	0.868808
	PACC	Cross-Sectional	rs149163416	18	34898841	DTNA	a	g	964	-0.641	--	0.5218	0.951249
	PACC	Cross-Sectional	20:33413780	20	33413780	SNTA1	a	t	964	0.727	++	0.4675	0.922404
	PACC	Cross-Sectional	rs291683	20	33431611	SNTA1	t	c	964	-1.119	--	0.2629	0.8768
	PACC	Cross-Sectional	20:33433270	20	33433270	SNTA1	t	c	964	0.436	-+	0.6629	0.9876
	PACC	Cross-Sectional	rs6141396	20	33436147	SNTA1	a	c	402	-0.403	-?	0.6872	0.9876
	PACC	Cross-Sectional	rs293721	20	33441633	SNTA1	t	c	964	-0.383	+-	0.7017	0.9876
	PACC	Longitudinal	rs111599092	3	49465346	DAG1	a	g	690	1.278	++	0.2014	0.733293
	PACC	Longitudinal	rs73073015	3	49465733	DAG1	a	g	690	0.992	++	0.3214	0.785319
	PACC	Longitudinal	rs7611164	3	49471395	DAG1	t	g	690	1.29	++	0.1972	0.733293
	PACC	Longitudinal	rs1568661	3	49483525	DAG1	a	g	690	-0.184	-+	0.8537	0.953498
	PACC	Longitudinal	rs7374731	3	49495661	DAG1	c	g	690	-1.713	--	0.08663	0.733293
	PACC	Longitudinal	rs73074811	3	49516098	DAG1	a	t	690	1.322	++	0.1863	0.733293
	PACC	Longitudinal	rs3870338	3	49519618	DAG1	a	g	690	-0.211	-+	0.8328	0.953498
	PACC	Longitudinal	rs55935606	3	49528072	DAG1	a	g	690	1.611	++	0.1073	0.733293
	PACC	Longitudinal	rs75153130	3	49530436	DAG1	a	c	690	-1.29	--	0.1972	0.733293
	PACC	Longitudinal	rs13079082	3	49537375	DAG1	c	g	690	-1.288	--	0.1979	0.733293
	PACC	Longitudinal	rs4052546	3	49538116	DAG1	c	g	690	1.713	++	0.08663	0.733293
	PACC	Longitudinal	rs73074830	3	49539584	DAG1	a	c	690	-1.242	--	0.2141	0.733293
	PACC	Longitudinal	rs114093899	3	49539955	DAG1	c	g	690	0.224	+-	0.823	0.953498
	PACC	Longitudinal	rs9789109	18	26842291	AQP4	a	g	690	1.54	++	0.1235	0.733293
	PACC	Longitudinal	rs10164026	18	26842362	AQP4	a	c	690	0.884	++	0.3764	0.789618
	PACC	Longitudinal	rs4800270	18	26844933	AQP4	t	g	690	0.319	-+	0.75	0.942661
	PACC	Longitudinal	rs79668602	18	26845488	AQP4	a	g	690	0.535	-+	0.5929	0.904491
	PACC	Longitudinal	rs12458416	18	26847267	AQP4	c	g	690	0.495	++	0.6206	0.904491
	PACC	Longitudinal	rs12953446	18	26848521	AQP4	a	g	690	0.294	+-	0.7687	0.948756
	PACC	Longitudinal	rs67461489	18	26848876	AQP4	t	c	690	0.446	-+	0.6556	0.907244
	PACC	Longitudinal	rs11661081	18	26850068	AQP4	a	c	690	0.881	++	0.3783	0.789618
	PACC	Longitudinal	rs3763043	18	26855854	AQP4	t	c	690	-0.415	-+	0.6778	0.915134
	PACC	Longitudinal	rs68006382	18	26856555	AQP4	a	g	690	0.026	+-	0.9789	0.9796
	PACC	Longitudinal	rs335930	18	26856961	AQP4	a	c	690	-1.2	--	0.2302	0.736614
	PACC	Longitudinal	rs71353405	18	26857429	AQP4	t	c	690	0.633	+-	0.5271	0.839683
	PACC	Longitudinal	rs162009	18	26864250	AQP4	a	g	690	0.564	++	0.5728	0.891745
	PACC	Longitudinal	rs4800773	18	26865017	AQP4	a	g	690	-0.785	--	0.4326	0.828089
	PACC	Longitudinal	rs3875089	18	26865469	AQP4	t	c	690	0.149	-+	0.8813	0.953498
	PACC	Longitudinal	rs72878787	18	26866517	AQP4	a	g	690	0.396	-+	0.6923	0.915134
	PACC	Longitudinal	rs162006	18	26866570	AQP4	t	c	690	0.964	++	0.335	0.785319
	PACC	Longitudinal	rs151244	18	26866755	AQP4	t	c	690	1.475	-+	0.1403	0.733293
	PACC	Longitudinal	rs72878794	18	26866839	AQP4	t	c	690	-1.836	--	0.0663	0.733293
	PACC	Longitudinal	rs9961118	18	26866901	AQP4	t	c	690	-1.027	--	0.3045	0.785319
	PACC	Longitudinal	rs162004	18	26867972	AQP4	c	g	690	0.146	+-	0.8839	0.953498
	PACC	Longitudinal	rs72878799	18	26868165	AQP4	a	g	690	1.082	+-	0.2794	0.785319
	PACC	Longitudinal	rs11662318	18	26869056	AQP4	t	c	690	-0.526	+-	0.599	0.904491
	PACC	Longitudinal	rs151246	18	26869139	AQP4	t	g	690	0.656	+-	0.5116	0.833121
	PACC	Longitudinal	rs491148	18	26869803	AQP4	a	g	690	0.357	-+	0.7211	0.931988
	PACC	Longitudinal	rs162002	18	26871015	AQP4	a	g	690	-0.244	-+	0.8076	0.953498
	PACC	Longitudinal	rs162001	18	26871481	AQP4	a	c	690	1.498	++	0.1342	0.733293
	PACC	Longitudinal	rs3865411	18	26871684	AQP4	a	g	690	0.026	-+	0.9796	0.9796
	PACC	Longitudinal	rs162000	18	26872471	AQP4	a	c	690	-0.648	-+	0.5169	0.833121
	PACC	Longitudinal	rs12969503	18	26873564	AQP4	t	g	690	-0.09	-+	0.9285	0.976256
	PACC	Longitudinal	rs8094228	18	26873767	AQP4	t	c	690	-0.521	+-	0.6023	0.904491
	PACC	Longitudinal	rs480647	18	26874290	AQP4	t	c	690	-0.198	-+	0.8432	0.953498
	PACC	Longitudinal	rs10502478	18	26874616	AQP4	a	c	690	0.448	+-	0.6544	0.907244
	PACC	Longitudinal	rs7234562	18	34483685	DTNA	t	c	690	0.745	-+	0.456	0.828939
	PACC	Longitudinal	rs79922046	18	34485536	DTNA	a	g	690	0.729	-+	0.4659	0.828939
	PACC	Longitudinal	rs9955950	18	34485672	DTNA	t	c	690	-1.299	+-	0.1939	0.733293
	PACC	Longitudinal	rs12957028	18	34485948	DTNA	a	g	690	-0.048	+-	0.9616	0.977064
	PACC	Longitudinal	rs72639491	18	34491438	DTNA	a	g	690	0.422	-+	0.6729	0.915134
	PACC	Longitudinal	rs62097347	18	34492032	DTNA	c	g	690	-0.41	-+	0.6817	0.915134
	PACC	Longitudinal	rs9961251	18	34492344	DTNA	t	c	690	1.672	-+	0.09452	0.733293
	PACC	Longitudinal	rs111846993	18	34494001	DTNA	t	c	690	1.618	++	0.1056	0.733293
	PACC	Longitudinal	rs4799769	18	34494577	DTNA	c	g	690	1.033	++	0.3017	0.785319
	PACC	Longitudinal	rs8092794	18	34496273	DTNA	a	g	690	-2.592	--	0.009549	0.733293
	PACC	Longitudinal	rs7243528	18	34497055	DTNA	t	c	690	1.442	++	0.1493	0.733293
	PACC	Longitudinal	rs79972565	18	34497194	DTNA	t	g	690	0.733	+-	0.4636	0.828939
	PACC	Longitudinal	rs35839923	18	34497764	DTNA	a	g	690	-0.782	--	0.4344	0.828089
	PACC	Longitudinal	rs62097349	18	34499519	DTNA	a	g	690	0.673	+-	0.501	0.833121
	PACC	Longitudinal	rs9965622	18	34502153	DTNA	t	c	690	-1.529	--	0.1263	0.733293
	PACC	Longitudinal	rs62098462	18	34504364	DTNA	t	c	690	1.63	++	0.1031	0.733293
	PACC	Longitudinal	rs75127284	18	34506592	DTNA	a	c	690	-1.768	--	0.07701	0.733293
	PACC	Longitudinal	rs2439861	18	34507940	DTNA	a	g	690	1.251	++	0.2109	0.733293
	PACC	Longitudinal	rs35982920	18	34516411	DTNA	a	g	690	1.057	++	0.2907	0.785319
	PACC	Longitudinal	rs2509597	18	34528430	DTNA	a	t	690	0.07	-+	0.9446	0.977064
	PACC	Longitudinal	rs71363449	18	34531997	DTNA	t	c	690	0.285	+-	0.7758	0.94897
	PACC	Longitudinal	rs2439853	18	34533937	DTNA	a	g	690	-0.924	+-	0.3554	0.785319
	PACC	Longitudinal	rs2439000	18	34536414	DTNA	c	g	690	1.137	++	0.2554	0.777551
	PACC	Longitudinal	rs11875892	18	34544032	DTNA	a	g	690	-0.156	+-	0.8761	0.953498
	PACC	Longitudinal	rs1967583	18	34544573	DTNA	t	c	690	-0.392	+-	0.6947	0.915134
	PACC	Longitudinal	rs28856895	18	34555507	DTNA	a	g	690	0.298	+-	0.7655	0.948756
	PACC	Longitudinal	rs77973497	18	34560529	DTNA	a	c	690	1.033	+-	0.3016	0.785319
	PACC	Longitudinal	rs2579796	18	34569243	DTNA	a	g	690	-0.91	+-	0.363	0.789381
	PACC	Longitudinal	rs2579797	18	34571732	DTNA	t	g	690	-1.26	--	0.2078	0.733293
	PACC	Longitudinal	rs2685557	18	34576782	DTNA	t	c	690	-0.96	+-	0.3373	0.785319
	PACC	Longitudinal	rs9958492	18	34577783	DTNA	t	c	690	0.187	+-	0.8519	0.953498
	PACC	Longitudinal	rs2579802	18	34579787	DTNA	a	c	690	-0.93	--	0.3524	0.785319
	PACC	Longitudinal	rs74920018	18	34607557	DTNA	a	t	690	1.564	+-	0.1177	0.733293
	PACC	Longitudinal	rs1439127	18	34607759	DTNA	a	t	690	0.083	+-	0.9335	0.976256
	PACC	Longitudinal	rs12327368	18	34611361	DTNA	a	g	690	0.365	+-	0.7148	0.931988
	PACC	Longitudinal	rs62097188	18	34611412	DTNA	a	g	690	-0.685	--	0.4935	0.833121
	PACC	Longitudinal	rs9807153	18	34635520	DTNA	a	t	690	0.095	-+	0.9246	0.976256
	PACC	Longitudinal	rs2730126	18	34635939	DTNA	a	c	690	-0.961	+-	0.3364	0.785319
	PACC	Longitudinal	rs1659526	18	34644451	DTNA	a	g	690	-1.276	--	0.2021	0.733293
	PACC	Longitudinal	rs17642885	18	34649976	DTNA	t	c	690	-0.748	-+	0.4546	0.828939
	PACC	Longitudinal	rs1240974	18	34650949	DTNA	t	c	690	-0.703	+-	0.4819	0.833121
	PACC	Longitudinal	rs55869511	18	34651262	DTNA	a	c	690	0.598	-+	0.5497	0.86562
	PACC	Longitudinal	rs12955208	18	34656737	DTNA	a	g	690	1.364	+-	0.1726	0.733293
	PACC	Longitudinal	rs72953203	18	34660068	DTNA	a	g	690	1.739	-+	0.082	0.733293
	PACC	Longitudinal	rs9946070	18	34665505	DTNA	a	g	690	-0.651	+-	0.5152	0.833121
	PACC	Longitudinal	rs72953211	18	34673381	DTNA	a	c	690	0.167	-+	0.8676	0.953498
	PACC	Longitudinal	rs55971592	18	34697328	DTNA	a	g	690	1.081	++	0.2799	0.785319
	PACC	Longitudinal	rs78837792	18	34703359	DTNA	t	c	690	-0.712	+-	0.4764	0.833121
	PACC	Longitudinal	rs11663468	18	34707936	DTNA	t	c	690	-0.195	+-	0.8455	0.953498
	PACC	Longitudinal	rs12963825	18	34709484	DTNA	a	g	690	-1.363	+-	0.173	0.733293
	PACC	Longitudinal	rs1480432	18	34727166	DTNA	t	g	690	0.86	+-	0.39	0.797463
	PACC	Longitudinal	rs45556134	18	34729425	DTNA	a	g	690	0.049	-+	0.9607	0.977064
	PACC	Longitudinal	rs899828	18	34732688	DTNA	t	g	690	-0.837	--	0.4028	0.799762
	PACC	Longitudinal	rs17556884	18	34736455	DTNA	t	c	690	0.499	-+	0.6181	0.904491
	PACC	Longitudinal	rs1480428	18	34738732	DTNA	a	g	690	0.506	-+	0.6132	0.904491
	PACC	Longitudinal	rs12957349	18	34739291	DTNA	t	c	690	1.564	+-	0.1179	0.733293
	PACC	Longitudinal	rs12608110	18	34752198	DTNA	a	g	690	-1.146	--	0.2519	0.777551
	PACC	Longitudinal	rs7228547	18	34760039	DTNA	a	g	690	-0.047	-+	0.9628	0.977064
	PACC	Longitudinal	rs8099437	18	34761448	DTNA	t	g	690	0.24	-+	0.8106	0.953498
	PACC	Longitudinal	rs72955132	18	34762382	DTNA	a	g	690	0.457	-+	0.6475	0.907244
	PACC	Longitudinal	rs1817452	18	34776629	DTNA	t	c	690	1.707	++	0.0878	0.733293
	PACC	Longitudinal	rs56404226	18	34778060	DTNA	a	g	690	-0.338	--	0.7351	0.932488
	PACC	Longitudinal	rs72955175	18	34779045	DTNA	a	t	690	-0.695	-+	0.4869	0.833121
	PACC	Longitudinal	rs12608251	18	34782906	DTNA	t	g	690	1.662	+-	0.09661	0.733293
	PACC	Longitudinal	rs76880720	18	34791141	DTNA	a	c	690	-1.442	-+	0.1494	0.733293
	PACC	Longitudinal	rs9989533	18	34793909	DTNA	t	c	690	-1.524	--	0.1276	0.733293
	PACC	Longitudinal	rs79500711	18	34794379	DTNA	a	g	690	0.091	-+	0.9274	0.976256
	PACC	Longitudinal	rs138856611	18	34801684	DTNA	t	g	690	-0.732	--	0.4643	0.828939
	PACC	Longitudinal	rs62097226	18	34804223	DTNA	a	t	690	-0.942	--	0.346	0.785319
	PACC	Longitudinal	rs4458079	18	34806161	DTNA	t	c	690	-0.877	+-	0.3804	0.789618
	PACC	Longitudinal	rs8086358	18	34813672	DTNA	t	g	690	0.455	+-	0.6489	0.907244
	PACC	Longitudinal	rs72963047	18	34818804	DTNA	a	c	690	-1.215	+-	0.2242	0.736614
	PACC	Longitudinal	rs17557660	18	34831178	DTNA	a	t	690	0.207	+-	0.8359	0.953498
	PACC	Longitudinal	rs1790533	18	34831631	DTNA	a	g	690	2.07	+-	0.03844	0.733293
	PACC	Longitudinal	rs4799782	18	34841123	DTNA	a	g	690	0.27	-+	0.7873	0.953498
	PACC	Longitudinal	rs1786604	18	34846264	DTNA	a	g	690	-1.34	--	0.1802	0.733293
	PACC	Longitudinal	rs7233779	18	34863262	DTNA	a	g	690	-0.339	+-	0.7346	0.932488
	PACC	Longitudinal	rs644982	18	34869793	DTNA	a	g	690	0.157	+-	0.8752	0.953498
	PACC	Longitudinal	rs11659517	18	34870978	DTNA	a	t	690	0.78	+-	0.4352	0.828089
	PACC	Longitudinal	rs524969	18	34872102	DTNA	a	t	690	-0.838	-+	0.4021	0.799762
	PACC	Longitudinal	rs637914	18	34876135	DTNA	a	t	690	-1.07	-+	0.2848	0.785319
	PACC	Longitudinal	rs9304141	18	34879143	DTNA	t	c	690	-1.197	+-	0.2312	0.736614
	PACC	Longitudinal	rs2288085	18	34879740	DTNA	a	g	690	-0.963	--	0.3354	0.785319
	PACC	Longitudinal	rs17558116	18	34882719	DTNA	t	c	690	0.934	+-	0.3502	0.785319
	PACC	Longitudinal	rs10502637	18	34890006	DTNA	t	c	690	0.472	+-	0.6372	0.907244
	PACC	Longitudinal	rs149163416	18	34898841	DTNA	a	g	690	1.44	-+	0.1497	0.733293
	PACC	Longitudinal	20:33413780	20	33413780	SNTA1	a	t	690	1.057	++	0.2906	0.785319
	PACC	Longitudinal	rs291683	20	33431611	SNTA1	t	c	690	1.651	++	0.09871	0.733293
	PACC	Longitudinal	20:33433270	20	33433270	SNTA1	t	c	690	-1.537	--	0.1244	0.733293
	PACC	Longitudinal	rs6141396	20	33436147	SNTA1	a	c	265	-2.051	-?	0.04026	0.733293
	PACC	Longitudinal	rs293721	20	33441633	SNTA1	t	c	690	1.423	++	0.1546	0.733293
	Ventricular_Volume	Cross-Sectional	rs111599092	3	49465346	DAG1	a	g	846	0.556	++	0.5779	0.848823
	Ventricular_Volume	Cross-Sectional	rs73073015	3	49465733	DAG1	a	g	846	1.117	++	0.2638	0.6302
	Ventricular_Volume	Cross-Sectional	rs7611164	3	49471395	DAG1	t	g	846	-0.076	-+	0.939	0.960022
	Ventricular_Volume	Cross-Sectional	rs1568661	3	49483525	DAG1	a	g	846	2.551	++	0.01075	0.184094
	Ventricular_Volume	Cross-Sectional	rs7374731	3	49495661	DAG1	c	g	846	0.42	-+	0.6742	0.861451
	Ventricular_Volume	Cross-Sectional	rs73074811	3	49516098	DAG1	a	t	846	-1.03	--	0.303	0.651811
	Ventricular_Volume	Cross-Sectional	rs3870338	3	49519618	DAG1	a	g	846	2.638	++	0.008338	0.176945
	Ventricular_Volume	Cross-Sectional	rs55935606	3	49528072	DAG1	a	g	846	-0.118	+-	0.9064	0.955312
	Ventricular_Volume	Cross-Sectional	rs75153130	3	49530436	DAG1	a	c	846	0.076	+-	0.939	0.960022
	Ventricular_Volume	Cross-Sectional	rs13079082	3	49537375	DAG1	c	g	846	-2.484	--	0.01299	0.197737
	Ventricular_Volume	Cross-Sectional	rs4052546	3	49538116	DAG1	c	g	846	-0.42	+-	0.6742	0.861451
	Ventricular_Volume	Cross-Sectional	rs73074830	3	49539584	DAG1	a	c	846	-0.726	--	0.468	0.802477
	Ventricular_Volume	Cross-Sectional	rs114093899	3	49539955	DAG1	c	g	846	-0.252	-+	0.8012	0.924462
	Ventricular_Volume	Cross-Sectional	rs9789109	18	26842291	AQP4	a	g	846	0.667	-+	0.5046	0.822979
	Ventricular_Volume	Cross-Sectional	rs10164026	18	26842362	AQP4	a	c	846	-1.364	--	0.1725	0.559832
	Ventricular_Volume	Cross-Sectional	rs4800270	18	26844933	AQP4	t	g	846	1.788	-+	0.07381	0.392576
	Ventricular_Volume	Cross-Sectional	rs79668602	18	26845488	AQP4	a	g	846	-0.376	--	0.7066	0.888112
	Ventricular_Volume	Cross-Sectional	rs12458416	18	26847267	AQP4	c	g	846	-1.443	--	0.149	0.551703
	Ventricular_Volume	Cross-Sectional	rs12953446	18	26848521	AQP4	a	g	846	2.059	++	0.03951	0.338304
	Ventricular_Volume	Cross-Sectional	rs67461489	18	26848876	AQP4	t	c	846	-1.016	+-	0.3096	0.651811
	Ventricular_Volume	Cross-Sectional	rs11661081	18	26850068	AQP4	a	c	846	-0.558	+-	0.5766	0.848823
	Ventricular_Volume	Cross-Sectional	rs3763043	18	26855854	AQP4	t	c	846	0.457	+-	0.6475	0.861238
	Ventricular_Volume	Cross-Sectional	rs68006382	18	26856555	AQP4	a	g	846	0.474	++	0.6357	0.861238
	Ventricular_Volume	Cross-Sectional	rs335930	18	26856961	AQP4	a	c	846	-0.577	+-	0.564	0.848823
	Ventricular_Volume	Cross-Sectional	rs71353405	18	26857429	AQP4	t	c	846	0.528	-+	0.5974	0.85254
	Ventricular_Volume	Cross-Sectional	rs162009	18	26864250	AQP4	a	g	846	1.192	-+	0.2332	0.591637
	Ventricular_Volume	Cross-Sectional	rs4800773	18	26865017	AQP4	a	g	846	1.353	++	0.1761	0.559832
	Ventricular_Volume	Cross-Sectional	rs3875089	18	26865469	AQP4	t	c	846	-1.517	--	0.1294	0.521406
	Ventricular_Volume	Cross-Sectional	rs72878787	18	26866517	AQP4	a	g	846	0.471	-+	0.638	0.861238
	Ventricular_Volume	Cross-Sectional	rs162006	18	26866570	AQP4	t	c	846	1.658	++	0.09731	0.435306
	Ventricular_Volume	Cross-Sectional	rs151244	18	26866755	AQP4	t	c	846	-1.92	--	0.05486	0.392576
	Ventricular_Volume	Cross-Sectional	rs72878794	18	26866839	AQP4	t	c	846	0.501	++	0.6164	0.861238
	Ventricular_Volume	Cross-Sectional	rs9961118	18	26866901	AQP4	t	c	846	-0.81	--	0.4179	0.763364
	Ventricular_Volume	Cross-Sectional	rs162004	18	26867972	AQP4	c	g	846	0.75	++	0.453	0.795654
	Ventricular_Volume	Cross-Sectional	rs72878799	18	26868165	AQP4	a	g	846	1.328	++	0.1843	0.561091
	Ventricular_Volume	Cross-Sectional	rs11662318	18	26869056	AQP4	t	c	846	1.007	++	0.3141	0.651811
	Ventricular_Volume	Cross-Sectional	rs151246	18	26869139	AQP4	t	g	846	0.179	+-	0.858	0.947952
	Ventricular_Volume	Cross-Sectional	rs491148	18	26869803	AQP4	a	g	846	-1.451	--	0.1467	0.551703
	Ventricular_Volume	Cross-Sectional	rs162002	18	26871015	AQP4	a	g	846	-1.375	+-	0.1692	0.559832
	Ventricular_Volume	Cross-Sectional	rs162001	18	26871481	AQP4	a	c	846	0.436	-+	0.6627	0.861451
	Ventricular_Volume	Cross-Sectional	rs3865411	18	26871684	AQP4	a	g	846	-0.135	+-	0.8926	0.955312
	Ventricular_Volume	Cross-Sectional	rs162000	18	26872471	AQP4	a	c	846	-1.065	--	0.2868	0.644125
	Ventricular_Volume	Cross-Sectional	rs12969503	18	26873564	AQP4	t	g	846	-0.852	+-	0.3942	0.729803
	Ventricular_Volume	Cross-Sectional	rs8094228	18	26873767	AQP4	t	c	846	0.799	-+	0.4241	0.764496
	Ventricular_Volume	Cross-Sectional	rs480647	18	26874290	AQP4	t	c	846	0.47	+-	0.638	0.861238
	Ventricular_Volume	Cross-Sectional	rs10502478	18	26874616	AQP4	a	c	846	0.505	-+	0.6133	0.861238
	Ventricular_Volume	Cross-Sectional	rs7234562	18	34483685	DTNA	t	c	846	2.295	++	0.02171	0.22879
	Ventricular_Volume	Cross-Sectional	rs79922046	18	34485536	DTNA	a	g	846	1.417	++	0.1565	0.559832
	Ventricular_Volume	Cross-Sectional	rs9955950	18	34485672	DTNA	t	c	846	0.462	++	0.6439	0.861238
	Ventricular_Volume	Cross-Sectional	rs12957028	18	34485948	DTNA	a	g	846	-2.176	--	0.02956	0.289266
	Ventricular_Volume	Cross-Sectional	rs72639491	18	34491438	DTNA	a	g	846	1.075	++	0.2823	0.644125
	Ventricular_Volume	Cross-Sectional	rs62097347	18	34492032	DTNA	c	g	846	-1.152	--	0.2494	0.610139
	Ventricular_Volume	Cross-Sectional	rs9961251	18	34492344	DTNA	t	c	846	1.739	++	0.08211	0.392576
	Ventricular_Volume	Cross-Sectional	rs111846993	18	34494001	DTNA	t	c	846	1.851	++	0.0641	0.392576
	Ventricular_Volume	Cross-Sectional	rs4799769	18	34494577	DTNA	c	g	846	0.541	+-	0.5886	0.848823
	Ventricular_Volume	Cross-Sectional	rs8092794	18	34496273	DTNA	a	g	846	-3.266	--	0.001091	0.149467
	Ventricular_Volume	Cross-Sectional	rs7243528	18	34497055	DTNA	t	c	846	1.048	++	0.2945	0.65075
	Ventricular_Volume	Cross-Sectional	rs79972565	18	34497194	DTNA	t	g	846	0.414	++	0.6791	0.861451
	Ventricular_Volume	Cross-Sectional	rs35839923	18	34497764	DTNA	a	g	846	0.959	-+	0.3378	0.651811
	Ventricular_Volume	Cross-Sectional	rs62097349	18	34499519	DTNA	a	g	846	1.778	++	0.0754	0.392576
	Ventricular_Volume	Cross-Sectional	rs9965622	18	34502153	DTNA	t	c	846	-3.029	--	0.002453	0.15666
	Ventricular_Volume	Cross-Sectional	rs62098462	18	34504364	DTNA	t	c	846	1.45	++	0.1471	0.551703
	Ventricular_Volume	Cross-Sectional	rs75127284	18	34506592	DTNA	a	c	846	-1.195	--	0.2321	0.591637
	Ventricular_Volume	Cross-Sectional	rs2439861	18	34507940	DTNA	a	g	846	1.226	++	0.2203	0.591637
	Ventricular_Volume	Cross-Sectional	rs35982920	18	34516411	DTNA	a	g	846	-0.984	+-	0.3252	0.651811
	Ventricular_Volume	Cross-Sectional	rs2509597	18	34528430	DTNA	a	t	846	-0.715	--	0.4746	0.802719
	Ventricular_Volume	Cross-Sectional	rs71363449	18	34531997	DTNA	t	c	846	0.227	-+	0.8207	0.936966
	Ventricular_Volume	Cross-Sectional	rs2439853	18	34533937	DTNA	a	g	846	-0.57	-+	0.5688	0.848823
	Ventricular_Volume	Cross-Sectional	rs2439000	18	34536414	DTNA	c	g	846	1.202	++	0.2292	0.591637
	Ventricular_Volume	Cross-Sectional	rs11875892	18	34544032	DTNA	a	g	846	-1.238	--	0.2157	0.591637
	Ventricular_Volume	Cross-Sectional	rs1967583	18	34544573	DTNA	t	c	846	-0.585	-+	0.5583	0.848823
	Ventricular_Volume	Cross-Sectional	rs28856895	18	34555507	DTNA	a	g	846	0.01	-+	0.9924	0.9924
	Ventricular_Volume	Cross-Sectional	rs77973497	18	34560529	DTNA	a	c	846	1.103	++	0.2699	0.6302
	Ventricular_Volume	Cross-Sectional	rs2579796	18	34569243	DTNA	a	g	846	-0.625	-+	0.5318	0.848823
	Ventricular_Volume	Cross-Sectional	rs2579797	18	34571732	DTNA	t	g	846	-0.876	--	0.3809	0.71484
	Ventricular_Volume	Cross-Sectional	rs2685557	18	34576782	DTNA	t	c	846	-0.566	-+	0.5715	0.848823
	Ventricular_Volume	Cross-Sectional	rs9958492	18	34577783	DTNA	t	c	846	0.305	-+	0.7607	0.906225
	Ventricular_Volume	Cross-Sectional	rs2579802	18	34579787	DTNA	a	c	846	-0.96	--	0.3371	0.651811
	Ventricular_Volume	Cross-Sectional	rs74920018	18	34607557	DTNA	a	t	846	0.544	++	0.5862	0.848823
	Ventricular_Volume	Cross-Sectional	rs1439127	18	34607759	DTNA	a	t	846	2.334	++	0.01962	0.223995
	Ventricular_Volume	Cross-Sectional	rs12327368	18	34611361	DTNA	a	g	846	0.725	-+	0.4686	0.802477
	Ventricular_Volume	Cross-Sectional	rs62097188	18	34611412	DTNA	a	g	846	-1.819	--	0.06891	0.392576
	Ventricular_Volume	Cross-Sectional	rs9807153	18	34635520	DTNA	a	t	846	1.177	++	0.2392	0.595825
	Ventricular_Volume	Cross-Sectional	rs2730126	18	34635939	DTNA	a	c	846	0.066	-+	0.9477	0.96174
	Ventricular_Volume	Cross-Sectional	rs1659526	18	34644451	DTNA	a	g	846	-0.692	+-	0.489	0.807145
	Ventricular_Volume	Cross-Sectional	rs17642885	18	34649976	DTNA	t	c	846	-2.67	--	0.007593	0.176945
	Ventricular_Volume	Cross-Sectional	rs1240974	18	34650949	DTNA	t	c	846	-0.427	+-	0.6692	0.861451
	Ventricular_Volume	Cross-Sectional	rs55869511	18	34651262	DTNA	a	c	846	-1.952	--	0.05095	0.392576
	Ventricular_Volume	Cross-Sectional	rs12955208	18	34656737	DTNA	a	g	846	-1.372	--	0.1701	0.559832
	Ventricular_Volume	Cross-Sectional	rs72953203	18	34660068	DTNA	a	g	846	-1.738	--	0.08223	0.392576
	Ventricular_Volume	Cross-Sectional	rs9946070	18	34665505	DTNA	a	g	846	1.31	++	0.1902	0.566465
	Ventricular_Volume	Cross-Sectional	rs72953211	18	34673381	DTNA	a	c	846	0.118	-+	0.9065	0.955312
	Ventricular_Volume	Cross-Sectional	rs55971592	18	34697328	DTNA	a	g	846	0.582	++	0.5606	0.848823
	Ventricular_Volume	Cross-Sectional	rs78837792	18	34703359	DTNA	t	c	846	2.836	++	0.004574	0.15666
	Ventricular_Volume	Cross-Sectional	rs11663468	18	34707936	DTNA	t	c	846	-0.094	--	0.9248	0.960022
	Ventricular_Volume	Cross-Sectional	rs12963825	18	34709484	DTNA	a	g	846	2.611	++	0.009041	0.176945
	Ventricular_Volume	Cross-Sectional	rs1480432	18	34727166	DTNA	t	g	846	-0.149	-+	0.8816	0.955312
	Ventricular_Volume	Cross-Sectional	rs45556134	18	34729425	DTNA	a	g	846	-1.893	--	0.05838	0.392576
	Ventricular_Volume	Cross-Sectional	rs899828	18	34732688	DTNA	t	g	846	0.985	-+	0.3245	0.651811
	Ventricular_Volume	Cross-Sectional	rs17556884	18	34736455	DTNA	t	c	846	-2.384	--	0.01714	0.223808
	Ventricular_Volume	Cross-Sectional	rs1480428	18	34738732	DTNA	a	g	846	-1.621	--	0.1049	0.449103
	Ventricular_Volume	Cross-Sectional	rs12957349	18	34739291	DTNA	t	c	846	-1.815	--	0.06951	0.392576
	Ventricular_Volume	Cross-Sectional	rs12608110	18	34752198	DTNA	a	g	846	-0.195	-+	0.8455	0.947082
	Ventricular_Volume	Cross-Sectional	rs7228547	18	34760039	DTNA	a	g	846	-0.278	--	0.7807	0.922034
	Ventricular_Volume	Cross-Sectional	rs8099437	18	34761448	DTNA	t	g	846	-1.874	--	0.06093	0.392576
	Ventricular_Volume	Cross-Sectional	rs72955132	18	34762382	DTNA	a	g	846	-2.112	--	0.03466	0.316561
	Ventricular_Volume	Cross-Sectional	rs1817452	18	34776629	DTNA	t	c	846	-1.601	--	0.1093	0.453761
	Ventricular_Volume	Cross-Sectional	rs56404226	18	34778060	DTNA	a	g	846	0.311	+-	0.7556	0.906225
	Ventricular_Volume	Cross-Sectional	rs72955175	18	34779045	DTNA	a	t	846	-0.129	+-	0.8973	0.955312
	Ventricular_Volume	Cross-Sectional	rs12608251	18	34782906	DTNA	t	g	846	-1.347	--	0.1779	0.559832
	Ventricular_Volume	Cross-Sectional	rs76880720	18	34791141	DTNA	a	c	846	1.733	++	0.0831	0.392576
	Ventricular_Volume	Cross-Sectional	rs9989533	18	34793909	DTNA	t	c	846	-0.345	-+	0.7304	0.893436
	Ventricular_Volume	Cross-Sectional	rs79500711	18	34794379	DTNA	a	g	846	-2.922	--	0.003476	0.15666
	Ventricular_Volume	Cross-Sectional	rs138856611	18	34801684	DTNA	t	g	846	-0.963	--	0.3357	0.651811
	Ventricular_Volume	Cross-Sectional	rs62097226	18	34804223	DTNA	a	t	846	0.586	++	0.5579	0.848823
	Ventricular_Volume	Cross-Sectional	rs4458079	18	34806161	DTNA	t	c	846	0.051	+-	0.9591	0.966152
	Ventricular_Volume	Cross-Sectional	rs8086358	18	34813672	DTNA	t	g	846	0.15	-+	0.8807	0.955312
	Ventricular_Volume	Cross-Sectional	rs72963047	18	34818804	DTNA	a	c	846	0.9	-+	0.3683	0.700793
	Ventricular_Volume	Cross-Sectional	rs17557660	18	34831178	DTNA	a	t	846	0.207	-+	0.8362	0.946772
	Ventricular_Volume	Cross-Sectional	rs1790533	18	34831631	DTNA	a	g	846	-1.286	--	0.1986	0.578898
	Ventricular_Volume	Cross-Sectional	rs4799782	18	34841123	DTNA	a	g	846	1.015	++	0.3101	0.651811
	Ventricular_Volume	Cross-Sectional	rs1786604	18	34846264	DTNA	a	g	846	-0.349	+-	0.727	0.893436
	Ventricular_Volume	Cross-Sectional	rs7233779	18	34863262	DTNA	a	g	846	2.366	-+	0.01797	0.223808
	Ventricular_Volume	Cross-Sectional	rs644982	18	34869793	DTNA	a	g	846	-0.086	--	0.9317	0.960022
	Ventricular_Volume	Cross-Sectional	rs11659517	18	34870978	DTNA	a	t	846	-1.877	--	0.06051	0.392576
	Ventricular_Volume	Cross-Sectional	rs524969	18	34872102	DTNA	a	t	846	1.652	++	0.0985	0.435306
	Ventricular_Volume	Cross-Sectional	rs637914	18	34876135	DTNA	a	t	846	1.254	++	0.2099	0.591637
	Ventricular_Volume	Cross-Sectional	rs9304141	18	34879143	DTNA	t	c	846	1.2	++	0.2301	0.591637
	Ventricular_Volume	Cross-Sectional	rs2288085	18	34879740	DTNA	a	g	846	1.1	-+	0.2714	0.6302
	Ventricular_Volume	Cross-Sectional	rs17558116	18	34882719	DTNA	t	c	846	-0.783	-+	0.4338	0.771826
	Ventricular_Volume	Cross-Sectional	rs10502637	18	34890006	DTNA	t	c	846	0.266	+-	0.7899	0.924462
	Ventricular_Volume	Cross-Sectional	rs149163416	18	34898841	DTNA	a	g	846	-0.693	--	0.4882	0.807145
	Ventricular_Volume	Cross-Sectional	20:33413780	20	33413780	SNTA1	a	t	846	0.249	-+	0.803	0.924462
	Ventricular_Volume	Cross-Sectional	rs291683	20	33431611	SNTA1	t	c	846	-0.189	-+	0.8503	0.947082
	Ventricular_Volume	Cross-Sectional	20:33433270	20	33433270	SNTA1	t	c	846	0.317	+-	0.7514	0.906225
	Ventricular_Volume	Cross-Sectional	rs6141396	20	33436147	SNTA1	a	c	328	1.341	+?	0.1798	0.559832
	Ventricular_Volume	Cross-Sectional	rs293721	20	33441633	SNTA1	t	c	846	0.363	-+	0.717	0.892991
	Ventricular_Volume	Longitudinal	rs111599092	3	49465346	DAG1	a	g	309	-0.991	--	0.3217	0.603738
	Ventricular_Volume	Longitudinal	rs73073015	3	49465733	DAG1	a	g	309	-1.531	-+	0.1259	0.3973
	Ventricular_Volume	Longitudinal	rs7611164	3	49471395	DAG1	t	g	309	-0.064	+-	0.9491	0.956079
	Ventricular_Volume	Longitudinal	rs1568661	3	49483525	DAG1	a	g	309	0.211	+-	0.8327	0.901503
	Ventricular_Volume	Longitudinal	rs7374731	3	49495661	DAG1	c	g	309	1.063	+-	0.2879	0.59319
	Ventricular_Volume	Longitudinal	rs73074811	3	49516098	DAG1	a	t	309	-0.806	--	0.4204	0.704548
	Ventricular_Volume	Longitudinal	rs3870338	3	49519618	DAG1	a	g	309	0.211	+-	0.8327	0.901503
	Ventricular_Volume	Longitudinal	rs55935606	3	49528072	DAG1	a	g	309	-1.311	-+	0.1898	0.48153
	Ventricular_Volume	Longitudinal	rs75153130	3	49530436	DAG1	a	c	309	0.064	-+	0.9491	0.956079
	Ventricular_Volume	Longitudinal	rs13079082	3	49537375	DAG1	c	g	309	0.714	+-	0.4752	0.726853
	Ventricular_Volume	Longitudinal	rs4052546	3	49538116	DAG1	c	g	309	-1.063	-+	0.2879	0.59319
	Ventricular_Volume	Longitudinal	rs73074830	3	49539584	DAG1	a	c	309	0.906	++	0.3648	0.660664
	Ventricular_Volume	Longitudinal	rs114093899	3	49539955	DAG1	c	g	309	-0.454	-+	0.6501	0.80967
	Ventricular_Volume	Longitudinal	rs9789109	18	26842291	AQP4	a	g	309	2.296	++	0.02169	0.148577
	Ventricular_Volume	Longitudinal	rs10164026	18	26842362	AQP4	a	c	309	-0.071	+-	0.9435	0.956079
	Ventricular_Volume	Longitudinal	rs4800270	18	26844933	AQP4	t	g	309	2.784	++	0.005366	0.0934169
	Ventricular_Volume	Longitudinal	rs79668602	18	26845488	AQP4	a	g	309	1.908	++	0.05639	0.249207
	Ventricular_Volume	Longitudinal	rs12458416	18	26847267	AQP4	c	g	309	-0.673	--	0.5012	0.730902
	Ventricular_Volume	Longitudinal	rs12953446	18	26848521	AQP4	a	g	309	1.656	++	0.09774	0.362523
	Ventricular_Volume	Longitudinal	rs67461489	18	26848876	AQP4	t	c	309	-0.702	--	0.4828	0.726853
	Ventricular_Volume	Longitudinal	rs11661081	18	26850068	AQP4	a	c	309	-0.413	-+	0.6792	0.830807
	Ventricular_Volume	Longitudinal	rs3763043	18	26855854	AQP4	t	c	309	1.468	++	0.1421	0.423211
	Ventricular_Volume	Longitudinal	rs68006382	18	26856555	AQP4	a	g	309	-1.106	--	0.2685	0.59319
	Ventricular_Volume	Longitudinal	rs335930	18	26856961	AQP4	a	c	309	-1.08	--	0.2803	0.59319
	Ventricular_Volume	Longitudinal	rs71353405	18	26857429	AQP4	t	c	309	0.647	++	0.5175	0.730902
	Ventricular_Volume	Longitudinal	rs162009	18	26864250	AQP4	a	g	309	1.577	++	0.1149	0.393533
	Ventricular_Volume	Longitudinal	rs4800773	18	26865017	AQP4	a	g	309	-0.021	+-	0.9836	0.9836
	Ventricular_Volume	Longitudinal	rs3875089	18	26865469	AQP4	t	c	309	-0.655	-+	0.5126	0.730902
	Ventricular_Volume	Longitudinal	rs72878787	18	26866517	AQP4	a	g	309	0.483	+-	0.6293	0.802393
	Ventricular_Volume	Longitudinal	rs162006	18	26866570	AQP4	t	c	309	1.158	++	0.247	0.563983
	Ventricular_Volume	Longitudinal	rs151244	18	26866755	AQP4	t	c	309	-1.382	--	0.1669	0.448339
	Ventricular_Volume	Longitudinal	rs72878794	18	26866839	AQP4	t	c	309	0.084	-+	0.9327	0.956079
	Ventricular_Volume	Longitudinal	rs9961118	18	26866901	AQP4	t	c	309	-0.341	-+	0.733	0.865698
	Ventricular_Volume	Longitudinal	rs162004	18	26867972	AQP4	c	g	309	-1.563	--	0.1179	0.393959
	Ventricular_Volume	Longitudinal	rs72878799	18	26868165	AQP4	a	g	309	-2.31	--	0.02087	0.148577
	Ventricular_Volume	Longitudinal	rs11662318	18	26869056	AQP4	t	c	309	0.481	+-	0.6306	0.802393
	Ventricular_Volume	Longitudinal	rs151246	18	26869139	AQP4	t	g	309	-2.135	--	0.03273	0.186834
	Ventricular_Volume	Longitudinal	rs491148	18	26869803	AQP4	a	g	309	-0.551	-+	0.5815	0.788767
	Ventricular_Volume	Longitudinal	rs162002	18	26871015	AQP4	a	g	309	-0.25	-+	0.8022	0.901503
	Ventricular_Volume	Longitudinal	rs162001	18	26871481	AQP4	a	c	309	-0.517	--	0.6052	0.802393
	Ventricular_Volume	Longitudinal	rs3865411	18	26871684	AQP4	a	g	309	-0.606	-+	0.5446	0.761329
	Ventricular_Volume	Longitudinal	rs162000	18	26872471	AQP4	a	c	309	1.009	-+	0.313	0.603738
	Ventricular_Volume	Longitudinal	rs12969503	18	26873564	AQP4	t	g	309	-0.085	-+	0.9325	0.956079
	Ventricular_Volume	Longitudinal	rs8094228	18	26873767	AQP4	t	c	309	0.141	-+	0.8878	0.935605
	Ventricular_Volume	Longitudinal	rs480647	18	26874290	AQP4	t	c	309	-2.173	--	0.02981	0.185635
	Ventricular_Volume	Longitudinal	rs10502478	18	26874616	AQP4	a	c	309	-0.751	-+	0.4525	0.720843
	Ventricular_Volume	Longitudinal	rs7234562	18	34483685	DTNA	t	c	309	0.703	++	0.4818	0.726853
	Ventricular_Volume	Longitudinal	rs79922046	18	34485536	DTNA	a	g	309	0.883	++	0.3773	0.662694
	Ventricular_Volume	Longitudinal	rs9955950	18	34485672	DTNA	t	c	309	-0.292	+-	0.7704	0.894447
	Ventricular_Volume	Longitudinal	rs12957028	18	34485948	DTNA	a	g	309	-0.659	--	0.5097	0.730902
	Ventricular_Volume	Longitudinal	rs72639491	18	34491438	DTNA	a	g	309	-0.824	--	0.4097	0.704548
	Ventricular_Volume	Longitudinal	rs62097347	18	34492032	DTNA	c	g	309	1.187	++	0.2353	0.546375
	Ventricular_Volume	Longitudinal	rs9961251	18	34492344	DTNA	t	c	309	0.804	++	0.4217	0.704548
	Ventricular_Volume	Longitudinal	rs111846993	18	34494001	DTNA	t	c	309	-1.781	--	0.07484	0.301561
	Ventricular_Volume	Longitudinal	rs4799769	18	34494577	DTNA	c	g	309	-1.081	+-	0.2795	0.59319
	Ventricular_Volume	Longitudinal	rs8092794	18	34496273	DTNA	a	g	309	-0.354	--	0.7237	0.865698
	Ventricular_Volume	Longitudinal	rs7243528	18	34497055	DTNA	t	c	309	2.779	++	0.005455	0.0934169
	Ventricular_Volume	Longitudinal	rs79972565	18	34497194	DTNA	t	g	309	2.788	++	0.005307	0.0934169
	Ventricular_Volume	Longitudinal	rs35839923	18	34497764	DTNA	a	g	309	-0.47	-+	0.6384	0.802393
	Ventricular_Volume	Longitudinal	rs62097349	18	34499519	DTNA	a	g	309	-0.506	-+	0.6131	0.802393
	Ventricular_Volume	Longitudinal	rs9965622	18	34502153	DTNA	t	c	309	0.998	+-	0.3182	0.603738
	Ventricular_Volume	Longitudinal	rs62098462	18	34504364	DTNA	t	c	309	-1.009	--	0.313	0.603738
	Ventricular_Volume	Longitudinal	rs75127284	18	34506592	DTNA	a	c	309	-1.035	-+	0.3008	0.603738
	Ventricular_Volume	Longitudinal	rs2439861	18	34507940	DTNA	a	g	309	2.031	++	0.04228	0.222783
	Ventricular_Volume	Longitudinal	rs35982920	18	34516411	DTNA	a	g	309	0.536	+-	0.5919	0.795003
	Ventricular_Volume	Longitudinal	rs2509597	18	34528430	DTNA	a	t	309	2.559	++	0.01049	0.102652
	Ventricular_Volume	Longitudinal	rs71363449	18	34531997	DTNA	t	c	309	1.215	-+	0.2245	0.530284
	Ventricular_Volume	Longitudinal	rs2439853	18	34533937	DTNA	a	g	309	-1.4	-+	0.1616	0.448339
	Ventricular_Volume	Longitudinal	rs2439000	18	34536414	DTNA	c	g	309	2.985	++	0.002838	0.0934169
	Ventricular_Volume	Longitudinal	rs11875892	18	34544032	DTNA	a	g	309	1.369	++	0.1711	0.450783
	Ventricular_Volume	Longitudinal	rs1967583	18	34544573	DTNA	t	c	309	-0.662	+-	0.5081	0.730902
	Ventricular_Volume	Longitudinal	rs28856895	18	34555507	DTNA	a	g	309	0.807	++	0.4196	0.704548
	Ventricular_Volume	Longitudinal	rs77973497	18	34560529	DTNA	a	c	309	-0.341	--	0.7327	0.865698
	Ventricular_Volume	Longitudinal	rs2579796	18	34569243	DTNA	a	g	309	-1.729	--	0.08381	0.328056
	Ventricular_Volume	Longitudinal	rs2579797	18	34571732	DTNA	t	g	309	-3.203	--	0.001362	0.0934169
	Ventricular_Volume	Longitudinal	rs2685557	18	34576782	DTNA	t	c	309	-1.789	--	0.07355	0.301561
	Ventricular_Volume	Longitudinal	rs9958492	18	34577783	DTNA	t	c	309	1.127	-+	0.2596	0.583036
	Ventricular_Volume	Longitudinal	rs2579802	18	34579787	DTNA	a	c	309	-2.693	--	0.007077	0.0969549
	Ventricular_Volume	Longitudinal	rs74920018	18	34607557	DTNA	a	t	309	-0.362	--	0.7171	0.865698
	Ventricular_Volume	Longitudinal	rs1439127	18	34607759	DTNA	a	t	309	-1.014	-+	0.3105	0.603738
	Ventricular_Volume	Longitudinal	rs12327368	18	34611361	DTNA	a	g	309	1.218	-+	0.223	0.530284
	Ventricular_Volume	Longitudinal	rs62097188	18	34611412	DTNA	a	g	309	0.491	+-	0.6233	0.802393
	Ventricular_Volume	Longitudinal	rs9807153	18	34635520	DTNA	a	t	309	0.24	-+	0.8103	0.901503
	Ventricular_Volume	Longitudinal	rs2730126	18	34635939	DTNA	a	c	309	-1.549	--	0.1214	0.395995
	Ventricular_Volume	Longitudinal	rs1659526	18	34644451	DTNA	a	g	309	-2.327	--	0.01998	0.148577
	Ventricular_Volume	Longitudinal	rs17642885	18	34649976	DTNA	t	c	309	0.575	++	0.565	0.77405
	Ventricular_Volume	Longitudinal	rs1240974	18	34650949	DTNA	t	c	309	-2.445	--	0.01447	0.131434
	Ventricular_Volume	Longitudinal	rs55869511	18	34651262	DTNA	a	c	309	-1.058	--	0.2901	0.59319
	Ventricular_Volume	Longitudinal	rs12955208	18	34656737	DTNA	a	g	309	-1.96	--	0.05001	0.249207
	Ventricular_Volume	Longitudinal	rs72953203	18	34660068	DTNA	a	g	309	2.611	++	0.009022	0.102652
	Ventricular_Volume	Longitudinal	rs9946070	18	34665505	DTNA	a	g	309	-0.894	+-	0.3714	0.660803
	Ventricular_Volume	Longitudinal	rs72953211	18	34673381	DTNA	a	c	309	1.629	++	0.1032	0.362523
	Ventricular_Volume	Longitudinal	rs55971592	18	34697328	DTNA	a	g	309	0.729	++	0.4659	0.726853
	Ventricular_Volume	Longitudinal	rs78837792	18	34703359	DTNA	t	c	309	-1.432	--	0.1522	0.443647
	Ventricular_Volume	Longitudinal	rs11663468	18	34707936	DTNA	t	c	309	-2.363	--	0.01811	0.145945
	Ventricular_Volume	Longitudinal	rs12963825	18	34709484	DTNA	a	g	309	0.776	++	0.4378	0.714031
	Ventricular_Volume	Longitudinal	rs1480432	18	34727166	DTNA	t	g	309	-2.572	--	0.0101	0.102652
	Ventricular_Volume	Longitudinal	rs45556134	18	34729425	DTNA	a	g	309	0.172	+-	0.8636	0.917157
	Ventricular_Volume	Longitudinal	rs899828	18	34732688	DTNA	t	g	309	-0.418	-+	0.6757	0.830807
	Ventricular_Volume	Longitudinal	rs17556884	18	34736455	DTNA	t	c	309	-0.712	--	0.4767	0.726853
	Ventricular_Volume	Longitudinal	rs1480428	18	34738732	DTNA	a	g	309	1.253	++	0.2101	0.513995
	Ventricular_Volume	Longitudinal	rs12957349	18	34739291	DTNA	t	c	309	-1.909	--	0.05631	0.249207
	Ventricular_Volume	Longitudinal	rs12608110	18	34752198	DTNA	a	g	309	0.239	-+	0.811	0.901503
	Ventricular_Volume	Longitudinal	rs7228547	18	34760039	DTNA	a	g	309	2.246	++	0.02473	0.161334
	Ventricular_Volume	Longitudinal	rs8099437	18	34761448	DTNA	t	g	309	1.253	++	0.2101	0.513995
	Ventricular_Volume	Longitudinal	rs72955132	18	34762382	DTNA	a	g	309	-0.78	+-	0.4352	0.714031
	Ventricular_Volume	Longitudinal	rs1817452	18	34776629	DTNA	t	c	309	-1.472	--	0.141	0.423211
	Ventricular_Volume	Longitudinal	rs56404226	18	34778060	DTNA	a	g	309	0.075	+-	0.94	0.956079
	Ventricular_Volume	Longitudinal	rs72955175	18	34779045	DTNA	a	t	309	2.142	++	0.0322	0.186834
	Ventricular_Volume	Longitudinal	rs12608251	18	34782906	DTNA	t	g	309	-2.952	--	0.003156	0.0934169
	Ventricular_Volume	Longitudinal	rs76880720	18	34791141	DTNA	a	c	309	1.65	++	0.09886	0.362523
	Ventricular_Volume	Longitudinal	rs9989533	18	34793909	DTNA	t	c	309	0.227	-+	0.8207	0.901503
	Ventricular_Volume	Longitudinal	rs79500711	18	34794379	DTNA	a	g	309	0.247	++	0.8051	0.901503
	Ventricular_Volume	Longitudinal	rs138856611	18	34801684	DTNA	t	g	309	-0.472	+-	0.6367	0.802393
	Ventricular_Volume	Longitudinal	rs62097226	18	34804223	DTNA	a	t	309	-0.953	--	0.3406	0.63057
	Ventricular_Volume	Longitudinal	rs4458079	18	34806161	DTNA	t	c	309	0.255	+-	0.7987	0.901503
	Ventricular_Volume	Longitudinal	rs8086358	18	34813672	DTNA	t	g	309	-1.419	+-	0.1559	0.444965
	Ventricular_Volume	Longitudinal	rs72963047	18	34818804	DTNA	a	c	309	-2.786	--	0.005343	0.0934169
	Ventricular_Volume	Longitudinal	rs17557660	18	34831178	DTNA	a	t	309	-0.752	-+	0.4521	0.720843
	Ventricular_Volume	Longitudinal	rs1790533	18	34831631	DTNA	a	g	309	-3.034	--	0.002413	0.0934169
	Ventricular_Volume	Longitudinal	rs4799782	18	34841123	DTNA	a	g	309	0.595	++	0.5517	0.763464
	Ventricular_Volume	Longitudinal	rs1786604	18	34846264	DTNA	a	g	309	2.424	++	0.01535	0.131434
	Ventricular_Volume	Longitudinal	rs7233779	18	34863262	DTNA	a	g	309	-2.078	--	0.03775	0.20687
	Ventricular_Volume	Longitudinal	rs644982	18	34869793	DTNA	a	g	309	-1.924	--	0.05435	0.249207
	Ventricular_Volume	Longitudinal	rs11659517	18	34870978	DTNA	a	t	309	-1.634	--	0.1023	0.362523
	Ventricular_Volume	Longitudinal	rs524969	18	34872102	DTNA	a	t	309	2.694	++	0.00706	0.0969549
	Ventricular_Volume	Longitudinal	rs637914	18	34876135	DTNA	a	t	309	1.93	++	0.05362	0.249207
	Ventricular_Volume	Longitudinal	rs9304141	18	34879143	DTNA	t	c	309	-1.336	--	0.1815	0.46916
	Ventricular_Volume	Longitudinal	rs2288085	18	34879740	DTNA	a	g	309	-1.524	--	0.1276	0.3973
	Ventricular_Volume	Longitudinal	rs17558116	18	34882719	DTNA	t	c	309	-1.847	--	0.0647	0.276997
	Ventricular_Volume	Longitudinal	rs10502637	18	34890006	DTNA	t	c	309	0.19	-+	0.8496	0.909338
	Ventricular_Volume	Longitudinal	rs149163416	18	34898841	DTNA	a	g	309	0.685	++	0.4935	0.730902
	Ventricular_Volume	Longitudinal	20:33413780	20	33413780	SNTA1	a	t	309	0.294	+-	0.7686	0.894447
	Ventricular_Volume	Longitudinal	rs291683	20	33431611	SNTA1	t	c	309	-1.388	--	0.1651	0.448339
	Ventricular_Volume	Longitudinal	20:33433270	20	33433270	SNTA1	t	c	309	0.903	++	0.3665	0.660664
	Ventricular_Volume	Longitudinal	rs6141396	20	33436147	SNTA1	a	c	169	-0.207	-?	0.8357	0.901503
	Ventricular_Volume	Longitudinal	rs293721	20	33441633	SNTA1	t	c	309	-2.652	--	0.008007	0.0997235
	White_Matter_Volume	Cross-Sectional	rs111599092	3	49465346	DAG1	a	g	846	2.047	++	0.04068	0.635832
	White_Matter_Volume	Cross-Sectional	rs73073015	3	49465733	DAG1	a	g	846	1.061	-+	0.2887	0.9963
	White_Matter_Volume	Cross-Sectional	rs7611164	3	49471395	DAG1	t	g	846	0.517	-+	0.6052	0.9963
	White_Matter_Volume	Cross-Sectional	rs1568661	3	49483525	DAG1	a	g	846	1.456	++	0.1453	0.870843
	White_Matter_Volume	Cross-Sectional	rs7374731	3	49495661	DAG1	c	g	846	0.345	++	0.7304	0.9963
	White_Matter_Volume	Cross-Sectional	rs73074811	3	49516098	DAG1	a	t	846	-1.43	--	0.1526	0.871092
	White_Matter_Volume	Cross-Sectional	rs3870338	3	49519618	DAG1	a	g	846	1.453	++	0.1462	0.870843
	White_Matter_Volume	Cross-Sectional	rs55935606	3	49528072	DAG1	a	g	846	-1.294	--	0.1956	0.954291
	White_Matter_Volume	Cross-Sectional	rs75153130	3	49530436	DAG1	a	c	846	-0.517	+-	0.6052	0.9963
	White_Matter_Volume	Cross-Sectional	rs13079082	3	49537375	DAG1	c	g	846	-1.132	--	0.2575	0.9963
	White_Matter_Volume	Cross-Sectional	rs4052546	3	49538116	DAG1	c	g	846	-0.345	--	0.7304	0.9963
	White_Matter_Volume	Cross-Sectional	rs73074830	3	49539584	DAG1	a	c	846	-2.036	--	0.04177	0.635832
	White_Matter_Volume	Cross-Sectional	rs114093899	3	49539955	DAG1	c	g	846	-0.871	--	0.384	0.9963
	White_Matter_Volume	Cross-Sectional	rs9789109	18	26842291	AQP4	a	g	846	0.808	++	0.4193	0.9963
	White_Matter_Volume	Cross-Sectional	rs10164026	18	26842362	AQP4	a	c	846	0.357	-+	0.7208	0.9963
	White_Matter_Volume	Cross-Sectional	rs4800270	18	26844933	AQP4	t	g	846	0.493	-+	0.6217	0.9963
	White_Matter_Volume	Cross-Sectional	rs79668602	18	26845488	AQP4	a	g	846	1.27	++	0.2042	0.954291
	White_Matter_Volume	Cross-Sectional	rs12458416	18	26847267	AQP4	c	g	846	-1.112	+-	0.2661	0.9963
	White_Matter_Volume	Cross-Sectional	rs12953446	18	26848521	AQP4	a	g	846	0.759	++	0.4479	0.9963
	White_Matter_Volume	Cross-Sectional	rs67461489	18	26848876	AQP4	t	c	846	0.169	++	0.8658	0.9963
	White_Matter_Volume	Cross-Sectional	rs11661081	18	26850068	AQP4	a	c	846	0.208	+-	0.8353	0.9963
	White_Matter_Volume	Cross-Sectional	rs3763043	18	26855854	AQP4	t	c	846	0.531	-+	0.5951	0.9963
	White_Matter_Volume	Cross-Sectional	rs68006382	18	26856555	AQP4	a	g	846	0.469	+-	0.6394	0.9963
	White_Matter_Volume	Cross-Sectional	rs335930	18	26856961	AQP4	a	c	846	0.137	-+	0.8909	0.9963
	White_Matter_Volume	Cross-Sectional	rs71353405	18	26857429	AQP4	t	c	846	-0.056	-+	0.955	0.9963
	White_Matter_Volume	Cross-Sectional	rs162009	18	26864250	AQP4	a	g	846	0.013	+-	0.9895	0.9963
	White_Matter_Volume	Cross-Sectional	rs4800773	18	26865017	AQP4	a	g	846	0.821	-+	0.4114	0.9963
	White_Matter_Volume	Cross-Sectional	rs3875089	18	26865469	AQP4	t	c	846	-0.046	-+	0.9633	0.9963
	White_Matter_Volume	Cross-Sectional	rs72878787	18	26866517	AQP4	a	g	846	-1.293	--	0.1959	0.954291
	White_Matter_Volume	Cross-Sectional	rs162006	18	26866570	AQP4	t	c	846	-0.545	+-	0.5858	0.9963
	White_Matter_Volume	Cross-Sectional	rs151244	18	26866755	AQP4	t	c	846	0.133	-+	0.8941	0.9963
	White_Matter_Volume	Cross-Sectional	rs72878794	18	26866839	AQP4	t	c	846	-0.884	-+	0.3768	0.9963
	White_Matter_Volume	Cross-Sectional	rs9961118	18	26866901	AQP4	t	c	846	0.232	-+	0.8166	0.9963
	White_Matter_Volume	Cross-Sectional	rs162004	18	26867972	AQP4	c	g	846	-1.006	+-	0.3142	0.9963
	White_Matter_Volume	Cross-Sectional	rs72878799	18	26868165	AQP4	a	g	846	-0.824	+-	0.4099	0.9963
	White_Matter_Volume	Cross-Sectional	rs11662318	18	26869056	AQP4	t	c	846	-0.181	+-	0.8567	0.9963
	White_Matter_Volume	Cross-Sectional	rs151246	18	26869139	AQP4	t	g	846	-1.072	+-	0.2837	0.9963
	White_Matter_Volume	Cross-Sectional	rs491148	18	26869803	AQP4	a	g	846	0.233	-+	0.8156	0.9963
	White_Matter_Volume	Cross-Sectional	rs162002	18	26871015	AQP4	a	g	846	-0.223	-+	0.8236	0.9963
	White_Matter_Volume	Cross-Sectional	rs162001	18	26871481	AQP4	a	c	846	0.118	+-	0.9064	0.9963
	White_Matter_Volume	Cross-Sectional	rs3865411	18	26871684	AQP4	a	g	846	0.005	-+	0.9963	0.9963
	White_Matter_Volume	Cross-Sectional	rs162000	18	26872471	AQP4	a	c	846	1.219	-+	0.2229	0.954291
	White_Matter_Volume	Cross-Sectional	rs12969503	18	26873564	AQP4	t	g	846	-0.992	-+	0.3211	0.9963
	White_Matter_Volume	Cross-Sectional	rs8094228	18	26873767	AQP4	t	c	846	0.608	+-	0.5431	0.9963
	White_Matter_Volume	Cross-Sectional	rs480647	18	26874290	AQP4	t	c	846	-1.534	--	0.1251	0.816129
	White_Matter_Volume	Cross-Sectional	rs10502478	18	26874616	AQP4	a	c	846	-0.579	--	0.5626	0.9963
	White_Matter_Volume	Cross-Sectional	rs7234562	18	34483685	DTNA	t	c	846	-1.745	--	0.08104	0.793034
	White_Matter_Volume	Cross-Sectional	rs79922046	18	34485536	DTNA	a	g	846	-1.565	+-	0.1175	0.816129
	White_Matter_Volume	Cross-Sectional	rs9955950	18	34485672	DTNA	t	c	846	0.348	+-	0.7279	0.9963
	White_Matter_Volume	Cross-Sectional	rs12957028	18	34485948	DTNA	a	g	846	1.664	-+	0.09605	0.816129
	White_Matter_Volume	Cross-Sectional	rs72639491	18	34491438	DTNA	a	g	846	-0.699	--	0.4844	0.9963
	White_Matter_Volume	Cross-Sectional	rs62097347	18	34492032	DTNA	c	g	846	0.155	-+	0.877	0.9963
	White_Matter_Volume	Cross-Sectional	rs9961251	18	34492344	DTNA	t	c	846	-1.088	--	0.2767	0.9963
	White_Matter_Volume	Cross-Sectional	rs111846993	18	34494001	DTNA	t	c	846	-1.54	--	0.1235	0.816129
	White_Matter_Volume	Cross-Sectional	rs4799769	18	34494577	DTNA	c	g	846	-0.679	+-	0.4969	0.9963
	White_Matter_Volume	Cross-Sectional	rs8092794	18	34496273	DTNA	a	g	846	2.528	++	0.01146	0.392505
	White_Matter_Volume	Cross-Sectional	rs7243528	18	34497055	DTNA	t	c	846	-1.55	--	0.1211	0.816129
	White_Matter_Volume	Cross-Sectional	rs79972565	18	34497194	DTNA	t	g	846	-1.62	--	0.1052	0.816129
	White_Matter_Volume	Cross-Sectional	rs35839923	18	34497764	DTNA	a	g	846	-0.196	+-	0.8447	0.9963
	White_Matter_Volume	Cross-Sectional	rs62097349	18	34499519	DTNA	a	g	846	0.231	-+	0.8175	0.9963
	White_Matter_Volume	Cross-Sectional	rs9965622	18	34502153	DTNA	t	c	846	1.841	++	0.06558	0.748705
	White_Matter_Volume	Cross-Sectional	rs62098462	18	34504364	DTNA	t	c	846	0.106	-+	0.9154	0.9963
	White_Matter_Volume	Cross-Sectional	rs75127284	18	34506592	DTNA	a	c	846	1.949	++	0.0513	0.70281
	White_Matter_Volume	Cross-Sectional	rs2439861	18	34507940	DTNA	a	g	846	-1.249	--	0.2116	0.954291
	White_Matter_Volume	Cross-Sectional	rs35982920	18	34516411	DTNA	a	g	846	0.85	++	0.3956	0.9963
	White_Matter_Volume	Cross-Sectional	rs2509597	18	34528430	DTNA	a	t	846	-0.427	--	0.6693	0.9963
	White_Matter_Volume	Cross-Sectional	rs71363449	18	34531997	DTNA	t	c	846	0.37	+-	0.7116	0.9963
	White_Matter_Volume	Cross-Sectional	rs2439853	18	34533937	DTNA	a	g	846	0.542	++	0.5879	0.9963
	White_Matter_Volume	Cross-Sectional	rs2439000	18	34536414	DTNA	c	g	846	-0.47	+-	0.6386	0.9963
	White_Matter_Volume	Cross-Sectional	rs11875892	18	34544032	DTNA	a	g	846	1.759	++	0.07862	0.793034
	White_Matter_Volume	Cross-Sectional	rs1967583	18	34544573	DTNA	t	c	846	1.579	++	0.1142	0.816129
	White_Matter_Volume	Cross-Sectional	rs28856895	18	34555507	DTNA	a	g	846	0.943	++	0.3455	0.9963
	White_Matter_Volume	Cross-Sectional	rs77973497	18	34560529	DTNA	a	c	846	0.503	++	0.6147	0.9963
	White_Matter_Volume	Cross-Sectional	rs2579796	18	34569243	DTNA	a	g	846	0.808	++	0.4193	0.9963
	White_Matter_Volume	Cross-Sectional	rs2579797	18	34571732	DTNA	t	g	846	0.354	-+	0.7233	0.9963
	White_Matter_Volume	Cross-Sectional	rs2685557	18	34576782	DTNA	t	c	846	0.888	++	0.3748	0.9963
	White_Matter_Volume	Cross-Sectional	rs9958492	18	34577783	DTNA	t	c	846	0.508	+-	0.6112	0.9963
	White_Matter_Volume	Cross-Sectional	rs2579802	18	34579787	DTNA	a	c	846	0.243	-+	0.8079	0.9963
	White_Matter_Volume	Cross-Sectional	rs74920018	18	34607557	DTNA	a	t	846	1.232	++	0.218	0.954291
	White_Matter_Volume	Cross-Sectional	rs1439127	18	34607759	DTNA	a	t	846	-1.252	+-	0.2105	0.954291
	White_Matter_Volume	Cross-Sectional	rs12327368	18	34611361	DTNA	a	g	846	0.423	+-	0.6725	0.9963
	White_Matter_Volume	Cross-Sectional	rs62097188	18	34611412	DTNA	a	g	846	0.706	+-	0.4802	0.9963
	White_Matter_Volume	Cross-Sectional	rs9807153	18	34635520	DTNA	a	t	846	-2.892	--	0.003827	0.285143
	White_Matter_Volume	Cross-Sectional	rs2730126	18	34635939	DTNA	a	c	846	0.134	+-	0.8932	0.9963
	White_Matter_Volume	Cross-Sectional	rs1659526	18	34644451	DTNA	a	g	846	0.075	-+	0.9405	0.9963
	White_Matter_Volume	Cross-Sectional	rs17642885	18	34649976	DTNA	t	c	846	1.078	-+	0.2809	0.9963
	White_Matter_Volume	Cross-Sectional	rs1240974	18	34650949	DTNA	t	c	846	-0.979	--	0.3275	0.9963
	White_Matter_Volume	Cross-Sectional	rs55869511	18	34651262	DTNA	a	c	846	0.143	-+	0.886	0.9963
	White_Matter_Volume	Cross-Sectional	rs12955208	18	34656737	DTNA	a	g	846	0.018	+-	0.9853	0.9963
	White_Matter_Volume	Cross-Sectional	rs72953203	18	34660068	DTNA	a	g	846	0.264	-+	0.7921	0.9963
	White_Matter_Volume	Cross-Sectional	rs9946070	18	34665505	DTNA	a	g	846	-0.016	-+	0.9871	0.9963
	White_Matter_Volume	Cross-Sectional	rs72953211	18	34673381	DTNA	a	c	846	-0.27	+-	0.7871	0.9963
	White_Matter_Volume	Cross-Sectional	rs55971592	18	34697328	DTNA	a	g	846	-0.082	-+	0.9348	0.9963
	White_Matter_Volume	Cross-Sectional	rs78837792	18	34703359	DTNA	t	c	846	-2.861	--	0.004227	0.285143
	White_Matter_Volume	Cross-Sectional	rs11663468	18	34707936	DTNA	t	c	846	-0.278	-+	0.7808	0.9963
	White_Matter_Volume	Cross-Sectional	rs12963825	18	34709484	DTNA	a	g	846	-1.227	--	0.22	0.954291
	White_Matter_Volume	Cross-Sectional	rs1480432	18	34727166	DTNA	t	g	846	-0.504	+-	0.614	0.9963
	White_Matter_Volume	Cross-Sectional	rs45556134	18	34729425	DTNA	a	g	846	0.052	+-	0.9582	0.9963
	White_Matter_Volume	Cross-Sectional	rs899828	18	34732688	DTNA	t	g	846	-1.885	--	0.05949	0.740921
	White_Matter_Volume	Cross-Sectional	rs17556884	18	34736455	DTNA	t	c	846	0.523	++	0.601	0.9963
	White_Matter_Volume	Cross-Sectional	rs1480428	18	34738732	DTNA	a	g	846	0.576	++	0.5645	0.9963
	White_Matter_Volume	Cross-Sectional	rs12957349	18	34739291	DTNA	t	c	846	-0.076	+-	0.9395	0.9963
	White_Matter_Volume	Cross-Sectional	rs12608110	18	34752198	DTNA	a	g	846	-0.624	+-	0.5323	0.9963
	White_Matter_Volume	Cross-Sectional	rs7228547	18	34760039	DTNA	a	g	846	0.062	+-	0.9504	0.9963
	White_Matter_Volume	Cross-Sectional	rs8099437	18	34761448	DTNA	t	g	846	0.468	++	0.6397	0.9963
	White_Matter_Volume	Cross-Sectional	rs72955132	18	34762382	DTNA	a	g	846	0.326	-+	0.7448	0.9963
	White_Matter_Volume	Cross-Sectional	rs1817452	18	34776629	DTNA	t	c	846	0.13	+-	0.8964	0.9963
	White_Matter_Volume	Cross-Sectional	rs56404226	18	34778060	DTNA	a	g	846	0.7	++	0.4842	0.9963
	White_Matter_Volume	Cross-Sectional	rs72955175	18	34779045	DTNA	a	t	846	0.27	+-	0.7873	0.9963
	White_Matter_Volume	Cross-Sectional	rs12608251	18	34782906	DTNA	t	g	846	0.022	+-	0.9822	0.9963
	White_Matter_Volume	Cross-Sectional	rs76880720	18	34791141	DTNA	a	c	846	-0.012	-+	0.9908	0.9963
	White_Matter_Volume	Cross-Sectional	rs9989533	18	34793909	DTNA	t	c	846	0.237	+-	0.8123	0.9963
	White_Matter_Volume	Cross-Sectional	rs79500711	18	34794379	DTNA	a	g	846	2.386	++	0.01705	0.46717
	White_Matter_Volume	Cross-Sectional	rs138856611	18	34801684	DTNA	t	g	846	-0.064	+-	0.9489	0.9963
	White_Matter_Volume	Cross-Sectional	rs62097226	18	34804223	DTNA	a	t	846	-0.236	+-	0.8135	0.9963
	White_Matter_Volume	Cross-Sectional	rs4458079	18	34806161	DTNA	t	c	846	0.247	-+	0.8051	0.9963
	White_Matter_Volume	Cross-Sectional	rs8086358	18	34813672	DTNA	t	g	846	0.595	+-	0.552	0.9963
	White_Matter_Volume	Cross-Sectional	rs72963047	18	34818804	DTNA	a	c	846	-0.11	+-	0.9122	0.9963
	White_Matter_Volume	Cross-Sectional	rs17557660	18	34831178	DTNA	a	t	846	-1.197	--	0.2313	0.960245
	White_Matter_Volume	Cross-Sectional	rs1790533	18	34831631	DTNA	a	g	846	0.046	+-	0.9632	0.9963
	White_Matter_Volume	Cross-Sectional	rs4799782	18	34841123	DTNA	a	g	846	0.426	-+	0.67	0.9963
	White_Matter_Volume	Cross-Sectional	rs1786604	18	34846264	DTNA	a	g	846	-0.181	--	0.8563	0.9963
	White_Matter_Volume	Cross-Sectional	rs7233779	18	34863262	DTNA	a	g	846	-2.735	--	0.006244	0.285143
	White_Matter_Volume	Cross-Sectional	rs644982	18	34869793	DTNA	a	g	846	1.026	++	0.3048	0.9963
	White_Matter_Volume	Cross-Sectional	rs11659517	18	34870978	DTNA	a	t	846	-0.385	+-	0.7002	0.9963
	White_Matter_Volume	Cross-Sectional	rs524969	18	34872102	DTNA	a	t	846	-0.416	-+	0.6771	0.9963
	White_Matter_Volume	Cross-Sectional	rs637914	18	34876135	DTNA	a	t	846	-0.199	--	0.8424	0.9963
	White_Matter_Volume	Cross-Sectional	rs9304141	18	34879143	DTNA	t	c	846	-0.942	+-	0.3463	0.9963
	White_Matter_Volume	Cross-Sectional	rs2288085	18	34879740	DTNA	a	g	846	-2.232	--	0.02562	0.544086
	White_Matter_Volume	Cross-Sectional	rs17558116	18	34882719	DTNA	t	c	846	-0.304	+-	0.7615	0.9963
	White_Matter_Volume	Cross-Sectional	rs10502637	18	34890006	DTNA	t	c	846	-0.941	--	0.347	0.9963
	White_Matter_Volume	Cross-Sectional	rs149163416	18	34898841	DTNA	a	g	846	0.061	-+	0.9513	0.9963
	White_Matter_Volume	Cross-Sectional	20:33413780	20	33413780	SNTA1	a	t	846	-0.869	--	0.3847	0.9963
	White_Matter_Volume	Cross-Sectional	rs291683	20	33431611	SNTA1	t	c	846	-0.553	-+	0.5799	0.9963
	White_Matter_Volume	Cross-Sectional	20:33433270	20	33433270	SNTA1	t	c	846	0.515	+-	0.6066	0.9963
	White_Matter_Volume	Cross-Sectional	rs6141396	20	33436147	SNTA1	a	c	328	2.2	+?	0.0278	0.544086
	White_Matter_Volume	Cross-Sectional	rs293721	20	33441633	SNTA1	t	c	846	-0.616	--	0.5378	0.9963
	White_Matter_Volume	Longitudinal	rs111599092	3	49465346	DAG1	a	g	309	0.45	+-	0.6526	0.942685
	White_Matter_Volume	Longitudinal	rs73073015	3	49465733	DAG1	a	g	309	-0.052	+-	0.9589	0.973106
	White_Matter_Volume	Longitudinal	rs7611164	3	49471395	DAG1	t	g	309	0.638	-+	0.5234	0.942685
	White_Matter_Volume	Longitudinal	rs1568661	3	49483525	DAG1	a	g	309	-0.181	+-	0.8561	0.942685
	White_Matter_Volume	Longitudinal	rs7374731	3	49495661	DAG1	c	g	309	-0.434	--	0.6644	0.942685
	White_Matter_Volume	Longitudinal	rs73074811	3	49516098	DAG1	a	t	309	0.781	-+	0.4349	0.942685
	White_Matter_Volume	Longitudinal	rs3870338	3	49519618	DAG1	a	g	309	-0.181	+-	0.8561	0.942685
	White_Matter_Volume	Longitudinal	rs55935606	3	49528072	DAG1	a	g	309	0.245	-+	0.8068	0.942685
	White_Matter_Volume	Longitudinal	rs75153130	3	49530436	DAG1	a	c	309	-0.638	+-	0.5234	0.942685
	White_Matter_Volume	Longitudinal	rs13079082	3	49537375	DAG1	c	g	309	-0.379	-+	0.7045	0.942685
	White_Matter_Volume	Longitudinal	rs4052546	3	49538116	DAG1	c	g	309	0.434	++	0.6644	0.942685
	White_Matter_Volume	Longitudinal	rs73074830	3	49539584	DAG1	a	c	309	-0.245	-+	0.8061	0.942685
	White_Matter_Volume	Longitudinal	rs114093899	3	49539955	DAG1	c	g	309	-0.238	--	0.8117	0.942685
	White_Matter_Volume	Longitudinal	rs9789109	18	26842291	AQP4	a	g	309	0.408	++	0.6834	0.942685
	White_Matter_Volume	Longitudinal	rs10164026	18	26842362	AQP4	a	c	309	0.623	-+	0.5334	0.942685
	White_Matter_Volume	Longitudinal	rs4800270	18	26844933	AQP4	t	g	309	-0.929	--	0.3529	0.942685
	White_Matter_Volume	Longitudinal	rs79668602	18	26845488	AQP4	a	g	309	-0.649	-+	0.5165	0.942685
	White_Matter_Volume	Longitudinal	rs12458416	18	26847267	AQP4	c	g	309	0.52	-+	0.6028	0.942685
	White_Matter_Volume	Longitudinal	rs12953446	18	26848521	AQP4	a	g	309	-0.23	+-	0.8178	0.942685
	White_Matter_Volume	Longitudinal	rs67461489	18	26848876	AQP4	t	c	309	-0.614	--	0.5393	0.942685
	White_Matter_Volume	Longitudinal	rs11661081	18	26850068	AQP4	a	c	309	-0.553	-+	0.5803	0.942685
	White_Matter_Volume	Longitudinal	rs3763043	18	26855854	AQP4	t	c	309	-1.112	--	0.2663	0.942685
	White_Matter_Volume	Longitudinal	rs68006382	18	26856555	AQP4	a	g	309	0.685	+-	0.4934	0.942685
	White_Matter_Volume	Longitudinal	rs335930	18	26856961	AQP4	a	c	309	0.059	-+	0.9531	0.973106
	White_Matter_Volume	Longitudinal	rs71353405	18	26857429	AQP4	t	c	309	1.681	-+	0.09277	0.942685
	White_Matter_Volume	Longitudinal	rs162009	18	26864250	AQP4	a	g	309	0.67	++	0.5029	0.942685
	White_Matter_Volume	Longitudinal	rs4800773	18	26865017	AQP4	a	g	309	0.365	+-	0.7153	0.942685
	White_Matter_Volume	Longitudinal	rs3875089	18	26865469	AQP4	t	c	309	0.124	+-	0.9014	0.942685
	White_Matter_Volume	Longitudinal	rs72878787	18	26866517	AQP4	a	g	309	0.664	++	0.5065	0.942685
	White_Matter_Volume	Longitudinal	rs162006	18	26866570	AQP4	t	c	309	-0.988	--	0.3231	0.942685
	White_Matter_Volume	Longitudinal	rs151244	18	26866755	AQP4	t	c	309	1.438	++	0.1503	0.942685
	White_Matter_Volume	Longitudinal	rs72878794	18	26866839	AQP4	t	c	309	0.639	-+	0.5225	0.942685
	White_Matter_Volume	Longitudinal	rs9961118	18	26866901	AQP4	t	c	309	1.291	++	0.1967	0.942685
	White_Matter_Volume	Longitudinal	rs162004	18	26867972	AQP4	c	g	309	0.194	-+	0.8461	0.942685
	White_Matter_Volume	Longitudinal	rs72878799	18	26868165	AQP4	a	g	309	-0.038	+-	0.97	0.977132
	White_Matter_Volume	Longitudinal	rs11662318	18	26869056	AQP4	t	c	309	0.649	++	0.5164	0.942685
	White_Matter_Volume	Longitudinal	rs151246	18	26869139	AQP4	t	g	309	-0.176	-+	0.8602	0.942685
	White_Matter_Volume	Longitudinal	rs491148	18	26869803	AQP4	a	g	309	0.147	+-	0.883	0.942685
	White_Matter_Volume	Longitudinal	rs162002	18	26871015	AQP4	a	g	309	-0.164	-+	0.87	0.942685
	White_Matter_Volume	Longitudinal	rs162001	18	26871481	AQP4	a	c	309	-0.206	+-	0.8368	0.942685
	White_Matter_Volume	Longitudinal	rs3865411	18	26871684	AQP4	a	g	309	0.17	+-	0.8652	0.942685
	White_Matter_Volume	Longitudinal	rs162000	18	26872471	AQP4	a	c	309	0.604	+-	0.5461	0.942685
	White_Matter_Volume	Longitudinal	rs12969503	18	26873564	AQP4	t	g	309	-0.015	-+	0.9877	0.9877
	White_Matter_Volume	Longitudinal	rs8094228	18	26873767	AQP4	t	c	309	0.229	+-	0.8187	0.942685
	White_Matter_Volume	Longitudinal	rs480647	18	26874290	AQP4	t	c	309	-1.056	--	0.2909	0.942685
	White_Matter_Volume	Longitudinal	rs10502478	18	26874616	AQP4	a	c	309	0.656	+-	0.5121	0.942685
	White_Matter_Volume	Longitudinal	rs7234562	18	34483685	DTNA	t	c	309	-0.287	+-	0.7737	0.942685
	White_Matter_Volume	Longitudinal	rs79922046	18	34485536	DTNA	a	g	309	0.804	+-	0.4215	0.942685
	White_Matter_Volume	Longitudinal	rs9955950	18	34485672	DTNA	t	c	309	-0.459	--	0.6465	0.942685
	White_Matter_Volume	Longitudinal	rs12957028	18	34485948	DTNA	a	g	309	-1.154	--	0.2486	0.942685
	White_Matter_Volume	Longitudinal	rs72639491	18	34491438	DTNA	a	g	309	-0.682	--	0.4954	0.942685
	White_Matter_Volume	Longitudinal	rs62097347	18	34492032	DTNA	c	g	309	0.532	-+	0.5944	0.942685
	White_Matter_Volume	Longitudinal	rs9961251	18	34492344	DTNA	t	c	309	0.411	++	0.6808	0.942685
	White_Matter_Volume	Longitudinal	rs111846993	18	34494001	DTNA	t	c	309	-0.449	-+	0.6537	0.942685
	White_Matter_Volume	Longitudinal	rs4799769	18	34494577	DTNA	c	g	309	-0.134	-+	0.8935	0.942685
	White_Matter_Volume	Longitudinal	rs8092794	18	34496273	DTNA	a	g	309	-1.25	--	0.2112	0.942685
	White_Matter_Volume	Longitudinal	rs7243528	18	34497055	DTNA	t	c	309	1.704	++	0.08835	0.942685
	White_Matter_Volume	Longitudinal	rs79972565	18	34497194	DTNA	t	g	309	1.737	++	0.08234	0.942685
	White_Matter_Volume	Longitudinal	rs35839923	18	34497764	DTNA	a	g	309	1.159	++	0.2464	0.942685
	White_Matter_Volume	Longitudinal	rs62097349	18	34499519	DTNA	a	g	309	1.402	++	0.1608	0.942685
	White_Matter_Volume	Longitudinal	rs9965622	18	34502153	DTNA	t	c	309	0.09	+-	0.9282	0.956116
	White_Matter_Volume	Longitudinal	rs62098462	18	34504364	DTNA	t	c	309	1.007	++	0.314	0.942685
	White_Matter_Volume	Longitudinal	rs75127284	18	34506592	DTNA	a	c	309	-1.685	--	0.092	0.942685
	White_Matter_Volume	Longitudinal	rs2439861	18	34507940	DTNA	a	g	309	1.661	++	0.09665	0.942685
	White_Matter_Volume	Longitudinal	rs35982920	18	34516411	DTNA	a	g	309	-0.716	+-	0.4741	0.942685
	White_Matter_Volume	Longitudinal	rs2509597	18	34528430	DTNA	a	t	309	-0.734	--	0.4627	0.942685
	White_Matter_Volume	Longitudinal	rs71363449	18	34531997	DTNA	t	c	309	0.517	++	0.605	0.942685
	White_Matter_Volume	Longitudinal	rs2439853	18	34533937	DTNA	a	g	309	-0.282	-+	0.7777	0.942685
	White_Matter_Volume	Longitudinal	rs2439000	18	34536414	DTNA	c	g	309	1.168	+-	0.2428	0.942685
	White_Matter_Volume	Longitudinal	rs11875892	18	34544032	DTNA	a	g	309	-1.204	--	0.2287	0.942685
	White_Matter_Volume	Longitudinal	rs1967583	18	34544573	DTNA	t	c	309	-1.129	--	0.259	0.942685
	White_Matter_Volume	Longitudinal	rs28856895	18	34555507	DTNA	a	g	309	1.427	++	0.1537	0.942685
	White_Matter_Volume	Longitudinal	rs77973497	18	34560529	DTNA	a	c	309	0.137	-+	0.8911	0.942685
	White_Matter_Volume	Longitudinal	rs2579796	18	34569243	DTNA	a	g	309	-0.704	-+	0.4817	0.942685
	White_Matter_Volume	Longitudinal	rs2579797	18	34571732	DTNA	t	g	309	-1.425	--	0.1542	0.942685
	White_Matter_Volume	Longitudinal	rs2685557	18	34576782	DTNA	t	c	309	-0.657	-+	0.511	0.942685
	White_Matter_Volume	Longitudinal	rs9958492	18	34577783	DTNA	t	c	309	0.497	++	0.6188	0.942685
	White_Matter_Volume	Longitudinal	rs2579802	18	34579787	DTNA	a	c	309	-1.156	--	0.2477	0.942685
	White_Matter_Volume	Longitudinal	rs74920018	18	34607557	DTNA	a	t	309	0.153	++	0.8781	0.942685
	White_Matter_Volume	Longitudinal	rs1439127	18	34607759	DTNA	a	t	309	-1.29	+-	0.197	0.942685
	White_Matter_Volume	Longitudinal	rs12327368	18	34611361	DTNA	a	g	309	0.245	++	0.8061	0.942685
	White_Matter_Volume	Longitudinal	rs62097188	18	34611412	DTNA	a	g	309	-0.287	--	0.7738	0.942685
	White_Matter_Volume	Longitudinal	rs9807153	18	34635520	DTNA	a	t	309	-1.08	+-	0.2804	0.942685
	White_Matter_Volume	Longitudinal	rs2730126	18	34635939	DTNA	a	c	309	-0.932	--	0.3514	0.942685
	White_Matter_Volume	Longitudinal	rs1659526	18	34644451	DTNA	a	g	309	-1.338	--	0.1809	0.942685
	White_Matter_Volume	Longitudinal	rs17642885	18	34649976	DTNA	t	c	309	0.862	++	0.3887	0.942685
	White_Matter_Volume	Longitudinal	rs1240974	18	34650949	DTNA	t	c	309	-0.803	-+	0.422	0.942685
	White_Matter_Volume	Longitudinal	rs55869511	18	34651262	DTNA	a	c	309	-0.231	+-	0.8172	0.942685
	White_Matter_Volume	Longitudinal	rs12955208	18	34656737	DTNA	a	g	309	-0.936	+-	0.3491	0.942685
	White_Matter_Volume	Longitudinal	rs72953203	18	34660068	DTNA	a	g	309	-0.376	-+	0.7071	0.942685
	White_Matter_Volume	Longitudinal	rs9946070	18	34665505	DTNA	a	g	309	1.079	-+	0.2808	0.942685
	White_Matter_Volume	Longitudinal	rs72953211	18	34673381	DTNA	a	c	309	-0.712	+-	0.4763	0.942685
	White_Matter_Volume	Longitudinal	rs55971592	18	34697328	DTNA	a	g	309	1.528	++	0.1266	0.942685
	White_Matter_Volume	Longitudinal	rs78837792	18	34703359	DTNA	t	c	309	1.108	++	0.2679	0.942685
	White_Matter_Volume	Longitudinal	rs11663468	18	34707936	DTNA	t	c	309	-0.297	-+	0.7668	0.942685
	White_Matter_Volume	Longitudinal	rs12963825	18	34709484	DTNA	a	g	309	1.357	++	0.1748	0.942685
	White_Matter_Volume	Longitudinal	rs1480432	18	34727166	DTNA	t	g	309	-0.638	--	0.5235	0.942685
	White_Matter_Volume	Longitudinal	rs45556134	18	34729425	DTNA	a	g	309	-0.903	--	0.3667	0.942685
	White_Matter_Volume	Longitudinal	rs899828	18	34732688	DTNA	t	g	309	1.459	++	0.1445	0.942685
	White_Matter_Volume	Longitudinal	rs17556884	18	34736455	DTNA	t	c	309	-0.572	+-	0.5674	0.942685
	White_Matter_Volume	Longitudinal	rs1480428	18	34738732	DTNA	a	g	309	-0.132	+-	0.8947	0.942685
	White_Matter_Volume	Longitudinal	rs12957349	18	34739291	DTNA	t	c	309	-0.864	--	0.3877	0.942685
	White_Matter_Volume	Longitudinal	rs12608110	18	34752198	DTNA	a	g	309	1.176	+-	0.2398	0.942685
	White_Matter_Volume	Longitudinal	rs7228547	18	34760039	DTNA	a	g	309	0.256	+-	0.7977	0.942685
	White_Matter_Volume	Longitudinal	rs8099437	18	34761448	DTNA	t	g	309	-0.132	+-	0.8947	0.942685
	White_Matter_Volume	Longitudinal	rs72955132	18	34762382	DTNA	a	g	309	-0.149	+-	0.8814	0.942685
	White_Matter_Volume	Longitudinal	rs1817452	18	34776629	DTNA	t	c	309	-0.196	+-	0.8449	0.942685
	White_Matter_Volume	Longitudinal	rs56404226	18	34778060	DTNA	a	g	309	-1.268	--	0.2048	0.942685
	White_Matter_Volume	Longitudinal	rs72955175	18	34779045	DTNA	a	t	309	0.348	+-	0.7282	0.942685
	White_Matter_Volume	Longitudinal	rs12608251	18	34782906	DTNA	t	g	309	-0.572	--	0.5672	0.942685
	White_Matter_Volume	Longitudinal	rs76880720	18	34791141	DTNA	a	c	309	0.259	-+	0.7955	0.942685
	White_Matter_Volume	Longitudinal	rs9989533	18	34793909	DTNA	t	c	309	0.505	+-	0.6138	0.942685
	White_Matter_Volume	Longitudinal	rs79500711	18	34794379	DTNA	a	g	309	0.224	++	0.823	0.942685
	White_Matter_Volume	Longitudinal	rs138856611	18	34801684	DTNA	t	g	309	-0.636	--	0.525	0.942685
	White_Matter_Volume	Longitudinal	rs62097226	18	34804223	DTNA	a	t	309	-1.212	--	0.2256	0.942685
	White_Matter_Volume	Longitudinal	rs4458079	18	34806161	DTNA	t	c	309	0.396	-+	0.6924	0.942685
	White_Matter_Volume	Longitudinal	rs8086358	18	34813672	DTNA	t	g	309	-0.846	--	0.3977	0.942685
	White_Matter_Volume	Longitudinal	rs72963047	18	34818804	DTNA	a	c	309	0.905	++	0.3654	0.942685
	White_Matter_Volume	Longitudinal	rs17557660	18	34831178	DTNA	a	t	309	0.527	+-	0.5985	0.942685
	White_Matter_Volume	Longitudinal	rs1790533	18	34831631	DTNA	a	g	309	-0.45	--	0.6528	0.942685
	White_Matter_Volume	Longitudinal	rs4799782	18	34841123	DTNA	a	g	309	0.638	++	0.5236	0.942685
	White_Matter_Volume	Longitudinal	rs1786604	18	34846264	DTNA	a	g	309	0.319	+-	0.75	0.942685
	White_Matter_Volume	Longitudinal	rs7233779	18	34863262	DTNA	a	g	309	0.896	++	0.37	0.942685
	White_Matter_Volume	Longitudinal	rs644982	18	34869793	DTNA	a	g	309	-0.504	-+	0.6143	0.942685
	White_Matter_Volume	Longitudinal	rs11659517	18	34870978	DTNA	a	t	309	-0.346	+-	0.7291	0.942685
	White_Matter_Volume	Longitudinal	rs524969	18	34872102	DTNA	a	t	309	0.778	++	0.4367	0.942685
	White_Matter_Volume	Longitudinal	rs637914	18	34876135	DTNA	a	t	309	0.691	++	0.4894	0.942685
	White_Matter_Volume	Longitudinal	rs9304141	18	34879143	DTNA	t	c	309	0.507	++	0.6119	0.942685
	White_Matter_Volume	Longitudinal	rs2288085	18	34879740	DTNA	a	g	309	0.881	++	0.3782	0.942685
	White_Matter_Volume	Longitudinal	rs17558116	18	34882719	DTNA	t	c	309	0.325	+-	0.745	0.942685
	White_Matter_Volume	Longitudinal	rs10502637	18	34890006	DTNA	t	c	309	0.522	++	0.6019	0.942685
	White_Matter_Volume	Longitudinal	rs149163416	18	34898841	DTNA	a	g	309	0.49	++	0.624	0.942685
	White_Matter_Volume	Longitudinal	20:33413780	20	33413780	SNTA1	a	t	309	-1.431	--	0.1525	0.942685
	White_Matter_Volume	Longitudinal	rs291683	20	33431611	SNTA1	t	c	309	1.604	++	0.1086	0.942685
	White_Matter_Volume	Longitudinal	20:33433270	20	33433270	SNTA1	t	c	309	-1.853	--	0.06387	0.942685
	White_Matter_Volume	Longitudinal	rs6141396	20	33436147	SNTA1	a	c	169	0.101	+?	0.9197	0.954537
	White_Matter_Volume	Longitudinal	rs293721	20	33441633	SNTA1	t	c	309	0.752	-+	0.4522	0.942685

## Sheet: Table S3
Supplementary Table 3: Meta-Analysis of linear regression results in Aβ+ participants (dominant genetic model)
	Outcome	Model	SNP	CHROM	POS	Gene_Symbol	Allele1	Allele2	Weight	Zscore	Direction	P	FDR_P
	Centiloid	Cross-Sectional	rs111599092	3	49465346	DAG1	a	g	973	-1.018	--	0.3088	0.826404
	Centiloid	Cross-Sectional	rs73073015	3	49465733	DAG1	a	g	973	0.406	-+	0.6851	0.872401
	Centiloid	Cross-Sectional	rs7611164	3	49471395	DAG1	t	g	973	-0.366	-+	0.7142	0.879225
	Centiloid	Cross-Sectional	rs1568661	3	49483525	DAG1	a	g	973	1.89	++	0.05879	0.803692
	Centiloid	Cross-Sectional	rs7374731	3	49495661	DAG1	c	g	973	0.504	++	0.6139	0.849799
	Centiloid	Cross-Sectional	rs73074811	3	49516098	DAG1	a	t	973	-0.513	-+	0.6083	0.849799
	Centiloid	Cross-Sectional	rs3870338	3	49519618	DAG1	a	g	973	1.89	++	0.05879	0.803692
	Centiloid	Cross-Sectional	rs55935606	3	49528072	DAG1	a	g	973	-0.7	--	0.4837	0.849799
	Centiloid	Cross-Sectional	rs75153130	3	49530436	DAG1	a	c	973	0.366	+-	0.7142	0.879225
	Centiloid	Cross-Sectional	rs13079082	3	49537375	DAG1	c	g	973	-0.452	+-	0.6514	0.849922
	Centiloid	Cross-Sectional	rs4052546	3	49538116	DAG1	c	g	973	-0.504	--	0.6139	0.849799
	Centiloid	Cross-Sectional	rs73074830	3	49539584	DAG1	a	c	973	0.877	++	0.3803	0.827002
	Centiloid	Cross-Sectional	rs114093899	3	49539955	DAG1	c	g	973	-0.178	+-	0.8586	0.933557
	Centiloid	Cross-Sectional	rs9789109	18	26842291	AQP4	a	g	973	-1.378	+-	0.1681	0.826404
	Centiloid	Cross-Sectional	rs10164026	18	26842362	AQP4	a	c	973	-0.759	+-	0.4477	0.849799
	Centiloid	Cross-Sectional	rs4800270	18	26844933	AQP4	t	g	973	1.278	-+	0.2013	0.826404
	Centiloid	Cross-Sectional	rs79668602	18	26845488	AQP4	a	g	973	0.702	++	0.4828	0.849799
	Centiloid	Cross-Sectional	rs12458416	18	26847267	AQP4	c	g	973	-1.899	--	0.05761	0.803692
	Centiloid	Cross-Sectional	rs12953446	18	26848521	AQP4	a	g	973	0.12	-+	0.9042	0.941564
	Centiloid	Cross-Sectional	rs67461489	18	26848876	AQP4	t	c	973	-0.477	+-	0.6336	0.849799
	Centiloid	Cross-Sectional	rs11661081	18	26850068	AQP4	a	c	973	-1.096	--	0.2729	0.826404
	Centiloid	Cross-Sectional	rs3763043	18	26855854	AQP4	t	c	973	1.712	++	0.08695	0.826404
	Centiloid	Cross-Sectional	rs68006382	18	26856555	AQP4	a	g	973	-0.598	--	0.5498	0.849799
	Centiloid	Cross-Sectional	rs335930	18	26856961	AQP4	a	c	973	0.969	++	0.3324	0.826404
	Centiloid	Cross-Sectional	rs71353405	18	26857429	AQP4	t	c	973	1.191	-+	0.2338	0.826404
	Centiloid	Cross-Sectional	rs162009	18	26864250	AQP4	a	g	973	0.185	-+	0.8531	0.933557
	Centiloid	Cross-Sectional	rs4800773	18	26865017	AQP4	a	g	973	1.224	-+	0.2208	0.826404
	Centiloid	Cross-Sectional	rs3875089	18	26865469	AQP4	t	c	973	-0.487	+-	0.6261	0.849799
	Centiloid	Cross-Sectional	rs72878787	18	26866517	AQP4	a	g	973	0.398	-+	0.6905	0.872401
	Centiloid	Cross-Sectional	rs162006	18	26866570	AQP4	t	c	973	-0.469	--	0.6389	0.849799
	Centiloid	Cross-Sectional	rs151244	18	26866755	AQP4	t	c	973	1.32	++	0.1867	0.826404
	Centiloid	Cross-Sectional	rs72878794	18	26866839	AQP4	t	c	973	0.973	+-	0.3305	0.826404
	Centiloid	Cross-Sectional	rs9961118	18	26866901	AQP4	t	c	973	1.311	++	0.19	0.826404
	Centiloid	Cross-Sectional	rs162004	18	26867972	AQP4	c	g	973	2.546	++	0.01091	0.391135
	Centiloid	Cross-Sectional	rs72878799	18	26868165	AQP4	a	g	973	-0.473	-+	0.6362	0.849799
	Centiloid	Cross-Sectional	rs11662318	18	26869056	AQP4	t	c	973	1.875	++	0.06083	0.803692
	Centiloid	Cross-Sectional	rs151246	18	26869139	AQP4	t	g	973	1.267	++	0.2052	0.826404
	Centiloid	Cross-Sectional	rs491148	18	26869803	AQP4	a	g	973	-1.244	+-	0.2136	0.826404
	Centiloid	Cross-Sectional	rs162002	18	26871015	AQP4	a	g	973	-0.326	+-	0.7445	0.886926
	Centiloid	Cross-Sectional	rs162001	18	26871481	AQP4	a	c	973	-2.529	--	0.01142	0.391135
	Centiloid	Cross-Sectional	rs3865411	18	26871684	AQP4	a	g	973	0.043	+-	0.9654	0.9751
	Centiloid	Cross-Sectional	rs162000	18	26872471	AQP4	a	c	973	-1.565	--	0.1177	0.826404
	Centiloid	Cross-Sectional	rs12969503	18	26873564	AQP4	t	g	973	0.718	++	0.4727	0.849799
	Centiloid	Cross-Sectional	rs8094228	18	26873767	AQP4	t	c	973	-1.114	--	0.2653	0.826404
	Centiloid	Cross-Sectional	rs480647	18	26874290	AQP4	t	c	973	-0.668	+-	0.504	0.849799
	Centiloid	Cross-Sectional	rs10502478	18	26874616	AQP4	a	c	973	-3.273	--	0.001065	0.145905
	Centiloid	Cross-Sectional	rs7234562	18	34483685	DTNA	t	c	973	-0.591	+-	0.5543	0.849799
	Centiloid	Cross-Sectional	rs79922046	18	34485536	DTNA	a	g	973	-0.794	+-	0.4272	0.849799
	Centiloid	Cross-Sectional	rs9955950	18	34485672	DTNA	t	c	973	0.571	+-	0.5681	0.849799
	Centiloid	Cross-Sectional	rs12957028	18	34485948	DTNA	a	g	973	1.016	-+	0.3096	0.826404
	Centiloid	Cross-Sectional	rs72639491	18	34491438	DTNA	a	g	973	0.49	++	0.6243	0.849799
	Centiloid	Cross-Sectional	rs62097347	18	34492032	DTNA	c	g	973	0.351	++	0.7252	0.879225
	Centiloid	Cross-Sectional	rs9961251	18	34492344	DTNA	t	c	973	-0.272	+-	0.7858	0.904661
	Centiloid	Cross-Sectional	rs111846993	18	34494001	DTNA	t	c	973	-0.308	+-	0.7579	0.887456
	Centiloid	Cross-Sectional	rs4799769	18	34494577	DTNA	c	g	973	-0.734	--	0.4631	0.849799
	Centiloid	Cross-Sectional	rs8092794	18	34496273	DTNA	a	g	973	1.037	++	0.2997	0.826404
	Centiloid	Cross-Sectional	rs7243528	18	34497055	DTNA	t	c	973	-1.069	+-	0.2852	0.826404
	Centiloid	Cross-Sectional	rs79972565	18	34497194	DTNA	t	g	973	-0.974	+-	0.3301	0.826404
	Centiloid	Cross-Sectional	rs35839923	18	34497764	DTNA	a	g	973	0.031	+-	0.9751	0.9751
	Centiloid	Cross-Sectional	rs62097349	18	34499519	DTNA	a	g	973	-1.378	--	0.1681	0.826404
	Centiloid	Cross-Sectional	rs9965622	18	34502153	DTNA	t	c	973	1.178	-+	0.2386	0.826404
	Centiloid	Cross-Sectional	rs62098462	18	34504364	DTNA	t	c	973	-1.714	--	0.08645	0.826404
	Centiloid	Cross-Sectional	rs75127284	18	34506592	DTNA	a	c	973	0.929	++	0.3531	0.827002
	Centiloid	Cross-Sectional	rs2439861	18	34507940	DTNA	a	g	973	-0.459	+-	0.6465	0.849922
	Centiloid	Cross-Sectional	rs35982920	18	34516411	DTNA	a	g	973	-0.094	+-	0.9251	0.952923
	Centiloid	Cross-Sectional	rs2509597	18	34528430	DTNA	a	t	973	0.209	+-	0.8343	0.929261
	Centiloid	Cross-Sectional	rs71363449	18	34531997	DTNA	t	c	973	-0.143	+-	0.8866	0.93434
	Centiloid	Cross-Sectional	rs2439853	18	34533937	DTNA	a	g	973	0.529	++	0.5965	0.849799
	Centiloid	Cross-Sectional	rs2439000	18	34536414	DTNA	c	g	973	-0.658	+-	0.5104	0.849799
	Centiloid	Cross-Sectional	rs11875892	18	34544032	DTNA	a	g	973	0.916	++	0.3599	0.827002
	Centiloid	Cross-Sectional	rs1967583	18	34544573	DTNA	t	c	973	0.599	++	0.5494	0.849799
	Centiloid	Cross-Sectional	rs28856895	18	34555507	DTNA	a	g	973	0.697	+-	0.4857	0.849799
	Centiloid	Cross-Sectional	rs77973497	18	34560529	DTNA	a	c	973	-1.052	-+	0.2928	0.826404
	Centiloid	Cross-Sectional	rs2579796	18	34569243	DTNA	a	g	973	0.576	++	0.5645	0.849799
	Centiloid	Cross-Sectional	rs2579797	18	34571732	DTNA	t	g	973	0.5	-+	0.6173	0.849799
	Centiloid	Cross-Sectional	rs2685557	18	34576782	DTNA	t	c	973	0.61	++	0.5417	0.849799
	Centiloid	Cross-Sectional	rs9958492	18	34577783	DTNA	t	c	973	0.155	+-	0.877	0.93434
	Centiloid	Cross-Sectional	rs2579802	18	34579787	DTNA	a	c	973	-0.352	-+	0.7246	0.879225
	Centiloid	Cross-Sectional	rs74920018	18	34607557	DTNA	a	t	973	-1.584	-+	0.1133	0.826404
	Centiloid	Cross-Sectional	rs1439127	18	34607759	DTNA	a	t	973	0.701	+-	0.4832	0.849799
	Centiloid	Cross-Sectional	rs12327368	18	34611361	DTNA	a	g	973	0.309	+-	0.7572	0.887456
	Centiloid	Cross-Sectional	rs62097188	18	34611412	DTNA	a	g	973	-1.337	--	0.1811	0.826404
	Centiloid	Cross-Sectional	rs9807153	18	34635520	DTNA	a	t	973	1.439	++	0.1502	0.826404
	Centiloid	Cross-Sectional	rs2730126	18	34635939	DTNA	a	c	973	0.623	+-	0.5333	0.849799
	Centiloid	Cross-Sectional	rs1659526	18	34644451	DTNA	a	g	973	0.242	+-	0.8085	0.915409
	Centiloid	Cross-Sectional	rs17642885	18	34649976	DTNA	t	c	973	-0.117	-+	0.9072	0.941564
	Centiloid	Cross-Sectional	rs1240974	18	34650949	DTNA	t	c	973	0.232	-+	0.8167	0.917114
	Centiloid	Cross-Sectional	rs55869511	18	34651262	DTNA	a	c	973	-0.539	--	0.5898	0.849799
	Centiloid	Cross-Sectional	rs12955208	18	34656737	DTNA	a	g	973	-0.998	-+	0.3182	0.826404
	Centiloid	Cross-Sectional	rs72953203	18	34660068	DTNA	a	g	973	-0.993	--	0.3205	0.826404
	Centiloid	Cross-Sectional	rs9946070	18	34665505	DTNA	a	g	973	0.768	++	0.4425	0.849799
	Centiloid	Cross-Sectional	rs72953211	18	34673381	DTNA	a	c	973	-0.262	-+	0.7931	0.905456
	Centiloid	Cross-Sectional	rs55971592	18	34697328	DTNA	a	g	973	1.224	++	0.221	0.826404
	Centiloid	Cross-Sectional	rs78837792	18	34703359	DTNA	t	c	973	0.856	++	0.3922	0.838814
	Centiloid	Cross-Sectional	rs11663468	18	34707936	DTNA	t	c	973	-1.153	--	0.249	0.826404
	Centiloid	Cross-Sectional	rs12963825	18	34709484	DTNA	a	g	973	1.158	++	0.2469	0.826404
	Centiloid	Cross-Sectional	rs1480432	18	34727166	DTNA	t	g	973	-0.156	-+	0.876	0.93434
	Centiloid	Cross-Sectional	rs45556134	18	34729425	DTNA	a	g	973	-1.131	--	0.2581	0.826404
	Centiloid	Cross-Sectional	rs899828	18	34732688	DTNA	t	g	973	1.276	++	0.2019	0.826404
	Centiloid	Cross-Sectional	rs17556884	18	34736455	DTNA	t	c	973	-0.836	--	0.4033	0.838814
	Centiloid	Cross-Sectional	rs1480428	18	34738732	DTNA	a	g	973	0.145	-+	0.8843	0.93434
	Centiloid	Cross-Sectional	rs12957349	18	34739291	DTNA	t	c	973	-1.039	-+	0.2986	0.826404
	Centiloid	Cross-Sectional	rs12608110	18	34752198	DTNA	a	g	973	1.949	++	0.05131	0.803692
	Centiloid	Cross-Sectional	rs7228547	18	34760039	DTNA	a	g	973	1.334	++	0.1821	0.826404
	Centiloid	Cross-Sectional	rs8099437	18	34761448	DTNA	t	g	973	0.333	-+	0.7391	0.886926
	Centiloid	Cross-Sectional	rs72955132	18	34762382	DTNA	a	g	973	-0.989	--	0.3228	0.826404
	Centiloid	Cross-Sectional	rs1817452	18	34776629	DTNA	t	c	973	-0.895	-+	0.3708	0.827002
	Centiloid	Cross-Sectional	rs56404226	18	34778060	DTNA	a	g	973	-1.421	--	0.1554	0.826404
	Centiloid	Cross-Sectional	rs72955175	18	34779045	DTNA	a	t	973	0.882	-+	0.378	0.827002
	Centiloid	Cross-Sectional	rs12608251	18	34782906	DTNA	t	g	973	-1.248	-+	0.2121	0.826404
	Centiloid	Cross-Sectional	rs76880720	18	34791141	DTNA	a	c	973	0.897	+-	0.3698	0.827002
	Centiloid	Cross-Sectional	rs9989533	18	34793909	DTNA	t	c	973	1.61	++	0.1075	0.826404
	Centiloid	Cross-Sectional	rs79500711	18	34794379	DTNA	a	g	973	0.759	++	0.4479	0.849799
	Centiloid	Cross-Sectional	rs138856611	18	34801684	DTNA	t	g	973	-1.24	-+	0.215	0.826404
	Centiloid	Cross-Sectional	rs62097226	18	34804223	DTNA	a	t	973	-0.29	--	0.7717	0.895957
	Centiloid	Cross-Sectional	rs4458079	18	34806161	DTNA	t	c	973	-0.393	--	0.6941	0.872401
	Centiloid	Cross-Sectional	rs8086358	18	34813672	DTNA	t	g	973	0.066	+-	0.9475	0.968713
	Centiloid	Cross-Sectional	rs72963047	18	34818804	DTNA	a	c	973	0.417	-+	0.6765	0.872401
	Centiloid	Cross-Sectional	rs17557660	18	34831178	DTNA	a	t	973	0.959	-+	0.3378	0.826404
	Centiloid	Cross-Sectional	rs1790533	18	34831631	DTNA	a	g	973	-0.944	-+	0.3453	0.827002
	Centiloid	Cross-Sectional	rs4799782	18	34841123	DTNA	a	g	973	1.295	++	0.1955	0.826404
	Centiloid	Cross-Sectional	rs1786604	18	34846264	DTNA	a	g	973	0.52	++	0.6034	0.849799
	Centiloid	Cross-Sectional	rs7233779	18	34863262	DTNA	a	g	973	0.791	++	0.4287	0.849799
	Centiloid	Cross-Sectional	rs644982	18	34869793	DTNA	a	g	973	-0.518	--	0.6043	0.849799
	Centiloid	Cross-Sectional	rs11659517	18	34870978	DTNA	a	t	973	-0.597	-+	0.5508	0.849799
	Centiloid	Cross-Sectional	rs524969	18	34872102	DTNA	a	t	973	0.976	+-	0.329	0.826404
	Centiloid	Cross-Sectional	rs637914	18	34876135	DTNA	a	t	973	0.834	+-	0.4041	0.838814
	Centiloid	Cross-Sectional	rs9304141	18	34879143	DTNA	t	c	973	0.668	++	0.5042	0.849799
	Centiloid	Cross-Sectional	rs2288085	18	34879740	DTNA	a	g	973	-0.035	+-	0.9725	0.9751
	Centiloid	Cross-Sectional	rs17558116	18	34882719	DTNA	t	c	973	-0.182	-+	0.8555	0.933557
	Centiloid	Cross-Sectional	rs10502637	18	34890006	DTNA	t	c	973	1.07	++	0.2846	0.826404
	Centiloid	Cross-Sectional	rs149163416	18	34898841	DTNA	a	g	973	-0.511	+-	0.6097	0.849799
	Centiloid	Cross-Sectional	20:33413780	20	33413780	SNTA1	a	t	973	-0.752	--	0.4519	0.849799
	Centiloid	Cross-Sectional	rs291683	20	33431611	SNTA1	t	c	973	-2.626	--	0.008643	0.391135
	Centiloid	Cross-Sectional	20:33433270	20	33433270	SNTA1	t	c	973	1.848	++	0.06453	0.803692
	Centiloid	Cross-Sectional	rs6141396	20	33436147	SNTA1	a	c	404	2.443	+?	0.01457	0.399218
	Centiloid	Cross-Sectional	rs293721	20	33441633	SNTA1	t	c	973	-1.322	--	0.1862	0.826404
	Centiloid	Longitudinal	rs111599092	3	49465346	DAG1	a	g	780	-1.114	-+	0.2652	0.846403
	Centiloid	Longitudinal	rs73073015	3	49465733	DAG1	a	g	780	-0.331	+-	0.7406	0.882889
	Centiloid	Longitudinal	rs7611164	3	49471395	DAG1	t	g	780	0.726	-+	0.4676	0.847666
	Centiloid	Longitudinal	rs1568661	3	49483525	DAG1	a	g	780	-1.402	--	0.1611	0.777818
	Centiloid	Longitudinal	rs7374731	3	49495661	DAG1	c	g	780	-0.964	--	0.3353	0.846403
	Centiloid	Longitudinal	rs73074811	3	49516098	DAG1	a	t	780	0.91	++	0.3629	0.846403
	Centiloid	Longitudinal	rs3870338	3	49519618	DAG1	a	g	780	-1.402	--	0.1611	0.777818
	Centiloid	Longitudinal	rs55935606	3	49528072	DAG1	a	g	780	1.221	++	0.2219	0.777818
	Centiloid	Longitudinal	rs75153130	3	49530436	DAG1	a	c	780	-0.726	+-	0.4676	0.847666
	Centiloid	Longitudinal	rs13079082	3	49537375	DAG1	c	g	780	0.288	-+	0.7731	0.886961
	Centiloid	Longitudinal	rs4052546	3	49538116	DAG1	c	g	780	0.964	++	0.3353	0.846403
	Centiloid	Longitudinal	rs73074830	3	49539584	DAG1	a	c	780	1.208	+-	0.2271	0.777818
	Centiloid	Longitudinal	rs114093899	3	49539955	DAG1	c	g	780	0.911	++	0.3625	0.846403
	Centiloid	Longitudinal	rs9789109	18	26842291	AQP4	a	g	780	0.314	-+	0.7537	0.882889
	Centiloid	Longitudinal	rs10164026	18	26842362	AQP4	a	c	780	1.89	++	0.05876	0.598448
	Centiloid	Longitudinal	rs4800270	18	26844933	AQP4	t	g	780	1.03	+-	0.3029	0.846403
	Centiloid	Longitudinal	rs79668602	18	26845488	AQP4	a	g	780	0.241	+-	0.8093	0.90743
	Centiloid	Longitudinal	rs12458416	18	26847267	AQP4	c	g	780	1.035	++	0.3007	0.846403
	Centiloid	Longitudinal	rs12953446	18	26848521	AQP4	a	g	780	-0.135	+-	0.8923	0.941085
	Centiloid	Longitudinal	rs67461489	18	26848876	AQP4	t	c	780	-0.648	--	0.5172	0.852946
	Centiloid	Longitudinal	rs11661081	18	26850068	AQP4	a	c	780	-1.231	--	0.2182	0.777818
	Centiloid	Longitudinal	rs3763043	18	26855854	AQP4	t	c	780	0.637	++	0.524	0.852946
	Centiloid	Longitudinal	rs68006382	18	26856555	AQP4	a	g	780	-1.004	--	0.3155	0.846403
	Centiloid	Longitudinal	rs335930	18	26856961	AQP4	a	c	780	-0.14	+-	0.8888	0.941085
	Centiloid	Longitudinal	rs71353405	18	26857429	AQP4	t	c	780	-0.039	-+	0.969	0.969
	Centiloid	Longitudinal	rs162009	18	26864250	AQP4	a	g	780	0.33	-+	0.7413	0.882889
	Centiloid	Longitudinal	rs4800773	18	26865017	AQP4	a	g	780	-0.51	--	0.6103	0.882889
	Centiloid	Longitudinal	rs3875089	18	26865469	AQP4	t	c	780	-0.357	--	0.7213	0.882889
	Centiloid	Longitudinal	rs72878787	18	26866517	AQP4	a	g	780	-0.071	+-	0.9433	0.968099
	Centiloid	Longitudinal	rs162006	18	26866570	AQP4	t	c	780	-0.432	--	0.6659	0.882889
	Centiloid	Longitudinal	rs151244	18	26866755	AQP4	t	c	780	0.596	+-	0.5511	0.877915
	Centiloid	Longitudinal	rs72878794	18	26866839	AQP4	t	c	780	1.583	++	0.1135	0.740452
	Centiloid	Longitudinal	rs9961118	18	26866901	AQP4	t	c	780	0.506	-+	0.613	0.882889
	Centiloid	Longitudinal	rs162004	18	26867972	AQP4	c	g	780	1.611	++	0.1072	0.73432
	Centiloid	Longitudinal	rs72878799	18	26868165	AQP4	a	g	780	-0.505	-+	0.6138	0.882889
	Centiloid	Longitudinal	rs11662318	18	26869056	AQP4	t	c	780	0.768	++	0.4423	0.847666
	Centiloid	Longitudinal	rs151246	18	26869139	AQP4	t	g	780	0.135	+-	0.893	0.941085
	Centiloid	Longitudinal	rs491148	18	26869803	AQP4	a	g	780	-0.517	--	0.6054	0.882889
	Centiloid	Longitudinal	rs162002	18	26871015	AQP4	a	g	780	-0.376	+-	0.7066	0.882889
	Centiloid	Longitudinal	rs162001	18	26871481	AQP4	a	c	780	-0.721	-+	0.4709	0.847666
	Centiloid	Longitudinal	rs3865411	18	26871684	AQP4	a	g	780	-1.369	--	0.1711	0.777818
	Centiloid	Longitudinal	rs162000	18	26872471	AQP4	a	c	780	-1.15	--	0.2501	0.8357
	Centiloid	Longitudinal	rs12969503	18	26873564	AQP4	t	g	780	0.506	+-	0.613	0.882889
	Centiloid	Longitudinal	rs8094228	18	26873767	AQP4	t	c	780	-0.555	-+	0.5788	0.882889
	Centiloid	Longitudinal	rs480647	18	26874290	AQP4	t	c	780	-0.85	+-	0.3954	0.846403
	Centiloid	Longitudinal	rs10502478	18	26874616	AQP4	a	c	780	0.428	-+	0.6686	0.882889
	Centiloid	Longitudinal	rs7234562	18	34483685	DTNA	t	c	780	-0.314	-+	0.7539	0.882889
	Centiloid	Longitudinal	rs79922046	18	34485536	DTNA	a	g	780	-0.727	--	0.4671	0.847666
	Centiloid	Longitudinal	rs9955950	18	34485672	DTNA	t	c	780	-0.629	--	0.5292	0.852946
	Centiloid	Longitudinal	rs12957028	18	34485948	DTNA	a	g	780	0.52	++	0.6029	0.882889
	Centiloid	Longitudinal	rs72639491	18	34491438	DTNA	a	g	780	-0.114	-+	0.9093	0.950947
	Centiloid	Longitudinal	rs62097347	18	34492032	DTNA	c	g	780	-0.454	--	0.65	0.882889
	Centiloid	Longitudinal	rs9961251	18	34492344	DTNA	t	c	780	-0.736	-+	0.4617	0.847666
	Centiloid	Longitudinal	rs111846993	18	34494001	DTNA	t	c	780	1.792	++	0.0732	0.598448
	Centiloid	Longitudinal	rs4799769	18	34494577	DTNA	c	g	780	1.271	+-	0.2036	0.777818
	Centiloid	Longitudinal	rs8092794	18	34496273	DTNA	a	g	780	0.067	-+	0.9469	0.968099
	Centiloid	Longitudinal	rs7243528	18	34497055	DTNA	t	c	780	-1.281	+-	0.2002	0.777818
	Centiloid	Longitudinal	rs79972565	18	34497194	DTNA	t	g	780	-0.898	+-	0.369	0.846403
	Centiloid	Longitudinal	rs35839923	18	34497764	DTNA	a	g	780	-0.353	+-	0.7244	0.882889
	Centiloid	Longitudinal	rs62097349	18	34499519	DTNA	a	g	780	-0.485	+-	0.6274	0.882889
	Centiloid	Longitudinal	rs9965622	18	34502153	DTNA	t	c	780	-0.765	--	0.4444	0.847666
	Centiloid	Longitudinal	rs62098462	18	34504364	DTNA	t	c	780	-0.463	+-	0.6434	0.882889
	Centiloid	Longitudinal	rs75127284	18	34506592	DTNA	a	c	780	0.313	-+	0.754	0.882889
	Centiloid	Longitudinal	rs2439861	18	34507940	DTNA	a	g	780	-0.885	+-	0.3762	0.846403
	Centiloid	Longitudinal	rs35982920	18	34516411	DTNA	a	g	780	0.964	++	0.3349	0.846403
	Centiloid	Longitudinal	rs2509597	18	34528430	DTNA	a	t	780	-0.203	+-	0.8393	0.919873
	Centiloid	Longitudinal	rs71363449	18	34531997	DTNA	t	c	780	1.614	++	0.1064	0.73432
	Centiloid	Longitudinal	rs2439853	18	34533937	DTNA	a	g	780	1.91	++	0.05607	0.598448
	Centiloid	Longitudinal	rs2439000	18	34536414	DTNA	c	g	780	-0.711	+-	0.4768	0.847666
	Centiloid	Longitudinal	rs11875892	18	34544032	DTNA	a	g	780	-0.234	-+	0.8147	0.90743
	Centiloid	Longitudinal	rs1967583	18	34544573	DTNA	t	c	780	0.174	-+	0.8621	0.93462
	Centiloid	Longitudinal	rs28856895	18	34555507	DTNA	a	g	780	1.033	+-	0.3015	0.846403
	Centiloid	Longitudinal	rs77973497	18	34560529	DTNA	a	c	780	-1.345	--	0.1786	0.777818
	Centiloid	Longitudinal	rs2579796	18	34569243	DTNA	a	g	780	1.827	++	0.06766	0.598448
	Centiloid	Longitudinal	rs2579797	18	34571732	DTNA	t	g	780	0.659	-+	0.5097	0.852946
	Centiloid	Longitudinal	rs2685557	18	34576782	DTNA	t	c	780	1.84	++	0.06576	0.598448
	Centiloid	Longitudinal	rs9958492	18	34577783	DTNA	t	c	780	1.792	++	0.07317	0.598448
	Centiloid	Longitudinal	rs2579802	18	34579787	DTNA	a	c	780	0.422	-+	0.6733	0.882889
	Centiloid	Longitudinal	rs74920018	18	34607557	DTNA	a	t	780	-0.864	+-	0.3874	0.846403
	Centiloid	Longitudinal	rs1439127	18	34607759	DTNA	a	t	780	0.981	++	0.3265	0.846403
	Centiloid	Longitudinal	rs12327368	18	34611361	DTNA	a	g	780	1.785	++	0.07426	0.598448
	Centiloid	Longitudinal	rs62097188	18	34611412	DTNA	a	g	780	-0.046	+-	0.963	0.969
	Centiloid	Longitudinal	rs9807153	18	34635520	DTNA	a	t	780	-0.718	--	0.4731	0.847666
	Centiloid	Longitudinal	rs2730126	18	34635939	DTNA	a	c	780	2.15	++	0.03156	0.598448
	Centiloid	Longitudinal	rs1659526	18	34644451	DTNA	a	g	780	0.987	-+	0.3236	0.846403
	Centiloid	Longitudinal	rs17642885	18	34649976	DTNA	t	c	780	-0.376	+-	0.7067	0.882889
	Centiloid	Longitudinal	rs1240974	18	34650949	DTNA	t	c	780	0.339	-+	0.7343	0.882889
	Centiloid	Longitudinal	rs55869511	18	34651262	DTNA	a	c	780	-0.283	--	0.7769	0.886961
	Centiloid	Longitudinal	rs12955208	18	34656737	DTNA	a	g	780	-0.332	-+	0.7395	0.882889
	Centiloid	Longitudinal	rs72953203	18	34660068	DTNA	a	g	780	-0.771	+-	0.4407	0.847666
	Centiloid	Longitudinal	rs9946070	18	34665505	DTNA	a	g	780	1.336	++	0.1814	0.777818
	Centiloid	Longitudinal	rs72953211	18	34673381	DTNA	a	c	780	-1.914	--	0.05559	0.598448
	Centiloid	Longitudinal	rs55971592	18	34697328	DTNA	a	g	780	-0.088	-+	0.9299	0.965123
	Centiloid	Longitudinal	rs78837792	18	34703359	DTNA	t	c	780	0.818	-+	0.4131	0.847666
	Centiloid	Longitudinal	rs11663468	18	34707936	DTNA	t	c	780	2.212	++	0.02694	0.598448
	Centiloid	Longitudinal	rs12963825	18	34709484	DTNA	a	g	780	0.852	++	0.3942	0.846403
	Centiloid	Longitudinal	rs1480432	18	34727166	DTNA	t	g	780	1.247	++	0.2126	0.777818
	Centiloid	Longitudinal	rs45556134	18	34729425	DTNA	a	g	780	0.696	++	0.4866	0.847666
	Centiloid	Longitudinal	rs899828	18	34732688	DTNA	t	g	780	-1.396	--	0.1626	0.777818
	Centiloid	Longitudinal	rs17556884	18	34736455	DTNA	t	c	780	-0.472	--	0.6369	0.882889
	Centiloid	Longitudinal	rs1480428	18	34738732	DTNA	a	g	780	-1.22	--	0.2224	0.777818
	Centiloid	Longitudinal	rs12957349	18	34739291	DTNA	t	c	780	-0.445	-+	0.6566	0.882889
	Centiloid	Longitudinal	rs12608110	18	34752198	DTNA	a	g	780	-1.094	--	0.2741	0.846403
	Centiloid	Longitudinal	rs7228547	18	34760039	DTNA	a	g	780	-2.004	--	0.04507	0.598448
	Centiloid	Longitudinal	rs8099437	18	34761448	DTNA	t	g	780	-1.304	--	0.1922	0.777818
	Centiloid	Longitudinal	rs72955132	18	34762382	DTNA	a	g	780	-0.249	--	0.8034	0.90743
	Centiloid	Longitudinal	rs1817452	18	34776629	DTNA	t	c	780	-0.467	--	0.6406	0.882889
	Centiloid	Longitudinal	rs56404226	18	34778060	DTNA	a	g	780	0.94	++	0.3471	0.846403
	Centiloid	Longitudinal	rs72955175	18	34779045	DTNA	a	t	780	-1.706	--	0.08807	0.670311
	Centiloid	Longitudinal	rs12608251	18	34782906	DTNA	t	g	780	1.523	++	0.1277	0.777818
	Centiloid	Longitudinal	rs76880720	18	34791141	DTNA	a	c	780	0.369	++	0.7123	0.882889
	Centiloid	Longitudinal	rs9989533	18	34793909	DTNA	t	c	780	-0.48	--	0.6311	0.882889
	Centiloid	Longitudinal	rs79500711	18	34794379	DTNA	a	g	780	-0.54	+-	0.5893	0.882889
	Centiloid	Longitudinal	rs138856611	18	34801684	DTNA	t	g	780	-1.341	--	0.1798	0.777818
	Centiloid	Longitudinal	rs62097226	18	34804223	DTNA	a	t	780	0.73	-+	0.4656	0.847666
	Centiloid	Longitudinal	rs4458079	18	34806161	DTNA	t	c	780	-0.65	--	0.516	0.852946
	Centiloid	Longitudinal	rs8086358	18	34813672	DTNA	t	g	780	2.204	++	0.02755	0.598448
	Centiloid	Longitudinal	rs72963047	18	34818804	DTNA	a	c	780	0.045	-+	0.9638	0.969
	Centiloid	Longitudinal	rs17557660	18	34831178	DTNA	a	t	780	-0.387	--	0.6986	0.882889
	Centiloid	Longitudinal	rs1790533	18	34831631	DTNA	a	g	780	1.216	-+	0.2239	0.777818
	Centiloid	Longitudinal	rs4799782	18	34841123	DTNA	a	g	780	1.82	++	0.06883	0.598448
	Centiloid	Longitudinal	rs1786604	18	34846264	DTNA	a	g	780	-1.939	--	0.05245	0.598448
	Centiloid	Longitudinal	rs7233779	18	34863262	DTNA	a	g	780	0.298	-+	0.766	0.886961
	Centiloid	Longitudinal	rs644982	18	34869793	DTNA	a	g	780	2.569	++	0.0102	0.598448
	Centiloid	Longitudinal	rs11659517	18	34870978	DTNA	a	t	780	-0.97	--	0.3322	0.846403
	Centiloid	Longitudinal	rs524969	18	34872102	DTNA	a	t	780	-1.328	+-	0.184	0.777818
	Centiloid	Longitudinal	rs637914	18	34876135	DTNA	a	t	780	-1.824	--	0.06813	0.598448
	Centiloid	Longitudinal	rs9304141	18	34879143	DTNA	t	c	780	-0.881	--	0.3783	0.846403
	Centiloid	Longitudinal	rs2288085	18	34879740	DTNA	a	g	780	-0.692	--	0.4888	0.847666
	Centiloid	Longitudinal	rs17558116	18	34882719	DTNA	t	c	780	0.694	-+	0.4876	0.847666
	Centiloid	Longitudinal	rs10502637	18	34890006	DTNA	t	c	780	1.346	++	0.1782	0.777818
	Centiloid	Longitudinal	rs149163416	18	34898841	DTNA	a	g	780	0.923	++	0.3561	0.846403
	Centiloid	Longitudinal	20:33413780	20	33413780	SNTA1	a	t	780	0.676	-+	0.4993	0.852946
	Centiloid	Longitudinal	rs291683	20	33431611	SNTA1	t	c	780	0.916	+-	0.3598	0.846403
	Centiloid	Longitudinal	20:33433270	20	33433270	SNTA1	t	c	780	0.225	-+	0.8217	0.907846
	Centiloid	Longitudinal	rs6141396	20	33436147	SNTA1	a	c	346	-1.797	-?	0.07238	0.598448
	Centiloid	Longitudinal	rs293721	20	33441633	SNTA1	t	c	780	-0.168	+-	0.8664	0.93462
	Grey_Matter_Volume	Cross-Sectional	rs111599092	3	49465346	DAG1	a	g	846	0.378	-+	0.7055	0.907193
	Grey_Matter_Volume	Cross-Sectional	rs73073015	3	49465733	DAG1	a	g	846	2.623	++	0.008719	0.238901
	Grey_Matter_Volume	Cross-Sectional	rs7611164	3	49471395	DAG1	t	g	846	2.87	++	0.004107	0.145905
	Grey_Matter_Volume	Cross-Sectional	rs1568661	3	49483525	DAG1	a	g	846	1.821	++	0.06858	0.560258
	Grey_Matter_Volume	Cross-Sectional	rs7374731	3	49495661	DAG1	c	g	846	-0.325	-+	0.7454	0.907193
	Grey_Matter_Volume	Cross-Sectional	rs73074811	3	49516098	DAG1	a	t	846	0.647	+-	0.5178	0.907193
	Grey_Matter_Volume	Cross-Sectional	rs3870338	3	49519618	DAG1	a	g	846	1.821	++	0.06858	0.560258
	Grey_Matter_Volume	Cross-Sectional	rs55935606	3	49528072	DAG1	a	g	846	0.306	++	0.7596	0.907193
	Grey_Matter_Volume	Cross-Sectional	rs75153130	3	49530436	DAG1	a	c	846	-2.87	--	0.004107	0.145905
	Grey_Matter_Volume	Cross-Sectional	rs13079082	3	49537375	DAG1	c	g	846	-1.419	+-	0.1559	0.633244
	Grey_Matter_Volume	Cross-Sectional	rs4052546	3	49538116	DAG1	c	g	846	0.325	+-	0.7454	0.907193
	Grey_Matter_Volume	Cross-Sectional	rs73074830	3	49539584	DAG1	a	c	846	0.427	+-	0.6694	0.907193
	Grey_Matter_Volume	Cross-Sectional	rs114093899	3	49539955	DAG1	c	g	846	-1.455	--	0.1456	0.633244
	Grey_Matter_Volume	Cross-Sectional	rs9789109	18	26842291	AQP4	a	g	846	1.764	++	0.0777	0.560258
	Grey_Matter_Volume	Cross-Sectional	rs10164026	18	26842362	AQP4	a	c	846	0.789	++	0.43	0.866324
	Grey_Matter_Volume	Cross-Sectional	rs4800270	18	26844933	AQP4	t	g	846	-0.74	+-	0.4591	0.885869
	Grey_Matter_Volume	Cross-Sectional	rs79668602	18	26845488	AQP4	a	g	846	-1.078	--	0.281	0.78761
	Grey_Matter_Volume	Cross-Sectional	rs12458416	18	26847267	AQP4	c	g	846	-1.389	--	0.1648	0.633244
	Grey_Matter_Volume	Cross-Sectional	rs12953446	18	26848521	AQP4	a	g	846	0.485	++	0.6277	0.907193
	Grey_Matter_Volume	Cross-Sectional	rs67461489	18	26848876	AQP4	t	c	846	1.46	++	0.1443	0.633244
	Grey_Matter_Volume	Cross-Sectional	rs11661081	18	26850068	AQP4	a	c	846	-0.762	-+	0.4461	0.885735
	Grey_Matter_Volume	Cross-Sectional	rs3763043	18	26855854	AQP4	t	c	846	0.011	+-	0.9909	0.9909
	Grey_Matter_Volume	Cross-Sectional	rs68006382	18	26856555	AQP4	a	g	846	1.124	++	0.2612	0.777922
	Grey_Matter_Volume	Cross-Sectional	rs335930	18	26856961	AQP4	a	c	846	-1.271	--	0.2039	0.681324
	Grey_Matter_Volume	Cross-Sectional	rs71353405	18	26857429	AQP4	t	c	846	-0.359	-+	0.7193	0.907193
	Grey_Matter_Volume	Cross-Sectional	rs162009	18	26864250	AQP4	a	g	846	-0.096	-+	0.9236	0.961249
	Grey_Matter_Volume	Cross-Sectional	rs4800773	18	26865017	AQP4	a	g	846	0.082	-+	0.9346	0.961249
	Grey_Matter_Volume	Cross-Sectional	rs3875089	18	26865469	AQP4	t	c	846	2.075	++	0.03801	0.560258
	Grey_Matter_Volume	Cross-Sectional	rs72878787	18	26866517	AQP4	a	g	846	1.55	+-	0.1211	0.633244
	Grey_Matter_Volume	Cross-Sectional	rs162006	18	26866570	AQP4	t	c	846	1.814	++	0.06975	0.560258
	Grey_Matter_Volume	Cross-Sectional	rs151244	18	26866755	AQP4	t	c	846	-0.75	--	0.4531	0.885869
	Grey_Matter_Volume	Cross-Sectional	rs72878794	18	26866839	AQP4	t	c	846	-0.83	--	0.4064	0.830997
	Grey_Matter_Volume	Cross-Sectional	rs9961118	18	26866901	AQP4	t	c	846	-0.315	--	0.7531	0.907193
	Grey_Matter_Volume	Cross-Sectional	rs162004	18	26867972	AQP4	c	g	846	0.37	-+	0.7114	0.907193
	Grey_Matter_Volume	Cross-Sectional	rs72878799	18	26868165	AQP4	a	g	846	1.225	++	0.2204	0.718924
	Grey_Matter_Volume	Cross-Sectional	rs11662318	18	26869056	AQP4	t	c	846	-0.393	+-	0.6943	0.907193
	Grey_Matter_Volume	Cross-Sectional	rs151246	18	26869139	AQP4	t	g	846	0.23	-+	0.8179	0.917009
	Grey_Matter_Volume	Cross-Sectional	rs491148	18	26869803	AQP4	a	g	846	1.058	++	0.2901	0.794874
	Grey_Matter_Volume	Cross-Sectional	rs162002	18	26871015	AQP4	a	g	846	0.527	++	0.5979	0.907193
	Grey_Matter_Volume	Cross-Sectional	rs162001	18	26871481	AQP4	a	c	846	1.512	++	0.1305	0.633244
	Grey_Matter_Volume	Cross-Sectional	rs3865411	18	26871684	AQP4	a	g	846	0.276	-+	0.7829	0.907193
	Grey_Matter_Volume	Cross-Sectional	rs162000	18	26872471	AQP4	a	c	846	-0.284	+-	0.7766	0.907193
	Grey_Matter_Volume	Cross-Sectional	rs12969503	18	26873564	AQP4	t	g	846	3.023	++	0.002501	0.145905
	Grey_Matter_Volume	Cross-Sectional	rs8094228	18	26873767	AQP4	t	c	846	-2.858	--	0.00426	0.145905
	Grey_Matter_Volume	Cross-Sectional	rs480647	18	26874290	AQP4	t	c	846	0.427	++	0.6695	0.907193
	Grey_Matter_Volume	Cross-Sectional	rs10502478	18	26874616	AQP4	a	c	846	0.269	++	0.7878	0.907193
	Grey_Matter_Volume	Cross-Sectional	rs7234562	18	34483685	DTNA	t	c	846	0.451	-+	0.6519	0.907193
	Grey_Matter_Volume	Cross-Sectional	rs79922046	18	34485536	DTNA	a	g	846	0.091	-+	0.9274	0.961249
	Grey_Matter_Volume	Cross-Sectional	rs9955950	18	34485672	DTNA	t	c	846	-0.065	-+	0.9481	0.962146
	Grey_Matter_Volume	Cross-Sectional	rs12957028	18	34485948	DTNA	a	g	846	-0.909	+-	0.3635	0.830997
	Grey_Matter_Volume	Cross-Sectional	rs72639491	18	34491438	DTNA	a	g	846	0.288	-+	0.7732	0.907193
	Grey_Matter_Volume	Cross-Sectional	rs62097347	18	34492032	DTNA	c	g	846	-0.72	+-	0.4718	0.897731
	Grey_Matter_Volume	Cross-Sectional	rs9961251	18	34492344	DTNA	t	c	846	-0.62	--	0.5354	0.907193
	Grey_Matter_Volume	Cross-Sectional	rs111846993	18	34494001	DTNA	t	c	846	0.4	++	0.6891	0.907193
	Grey_Matter_Volume	Cross-Sectional	rs4799769	18	34494577	DTNA	c	g	846	1.537	++	0.1243	0.633244
	Grey_Matter_Volume	Cross-Sectional	rs8092794	18	34496273	DTNA	a	g	846	-1.011	+-	0.3121	0.811143
	Grey_Matter_Volume	Cross-Sectional	rs7243528	18	34497055	DTNA	t	c	846	-0.26	-+	0.7952	0.907853
	Grey_Matter_Volume	Cross-Sectional	rs79972565	18	34497194	DTNA	t	g	846	-0.182	--	0.8553	0.944969
	Grey_Matter_Volume	Cross-Sectional	rs35839923	18	34497764	DTNA	a	g	846	0.099	-+	0.9215	0.961249
	Grey_Matter_Volume	Cross-Sectional	rs62097349	18	34499519	DTNA	a	g	846	-1.128	-+	0.2593	0.777922
	Grey_Matter_Volume	Cross-Sectional	rs9965622	18	34502153	DTNA	t	c	846	-1.442	+-	0.1494	0.633244
	Grey_Matter_Volume	Cross-Sectional	rs62098462	18	34504364	DTNA	t	c	846	-1.173	--	0.2406	0.764398
	Grey_Matter_Volume	Cross-Sectional	rs75127284	18	34506592	DTNA	a	c	846	0.396	-+	0.6924	0.907193
	Grey_Matter_Volume	Cross-Sectional	rs2439861	18	34507940	DTNA	a	g	846	-0.337	+-	0.7364	0.907193
	Grey_Matter_Volume	Cross-Sectional	rs35982920	18	34516411	DTNA	a	g	846	0.085	+-	0.9324	0.961249
	Grey_Matter_Volume	Cross-Sectional	rs2509597	18	34528430	DTNA	a	t	846	1.161	++	0.2455	0.764398
	Grey_Matter_Volume	Cross-Sectional	rs71363449	18	34531997	DTNA	t	c	846	-1.077	--	0.2817	0.78761
	Grey_Matter_Volume	Cross-Sectional	rs2439853	18	34533937	DTNA	a	g	846	-0.269	--	0.788	0.907193
	Grey_Matter_Volume	Cross-Sectional	rs2439000	18	34536414	DTNA	c	g	846	-0.643	+-	0.5204	0.907193
	Grey_Matter_Volume	Cross-Sectional	rs11875892	18	34544032	DTNA	a	g	846	-0.589	+-	0.5561	0.907193
	Grey_Matter_Volume	Cross-Sectional	rs1967583	18	34544573	DTNA	t	c	846	-1.454	--	0.1459	0.633244
	Grey_Matter_Volume	Cross-Sectional	rs28856895	18	34555507	DTNA	a	g	846	-0.618	+-	0.5365	0.907193
	Grey_Matter_Volume	Cross-Sectional	rs77973497	18	34560529	DTNA	a	c	846	-1.776	--	0.07576	0.560258
	Grey_Matter_Volume	Cross-Sectional	rs2579796	18	34569243	DTNA	a	g	846	-0.403	--	0.6869	0.907193
	Grey_Matter_Volume	Cross-Sectional	rs2579797	18	34571732	DTNA	t	g	846	0.482	-+	0.6301	0.907193
	Grey_Matter_Volume	Cross-Sectional	rs2685557	18	34576782	DTNA	t	c	846	-0.394	--	0.6938	0.907193
	Grey_Matter_Volume	Cross-Sectional	rs9958492	18	34577783	DTNA	t	c	846	-1.312	--	0.1895	0.665679
	Grey_Matter_Volume	Cross-Sectional	rs2579802	18	34579787	DTNA	a	c	846	0.156	-+	0.8758	0.954325
	Grey_Matter_Volume	Cross-Sectional	rs74920018	18	34607557	DTNA	a	t	846	-1.849	--	0.06439	0.560258
	Grey_Matter_Volume	Cross-Sectional	rs1439127	18	34607759	DTNA	a	t	846	-0.83	--	0.4063	0.830997
	Grey_Matter_Volume	Cross-Sectional	rs12327368	18	34611361	DTNA	a	g	846	-1.566	--	0.1173	0.633244
	Grey_Matter_Volume	Cross-Sectional	rs62097188	18	34611412	DTNA	a	g	846	-0.545	--	0.5857	0.907193
	Grey_Matter_Volume	Cross-Sectional	rs9807153	18	34635520	DTNA	a	t	846	0.524	+-	0.6005	0.907193
	Grey_Matter_Volume	Cross-Sectional	rs2730126	18	34635939	DTNA	a	c	846	-0.928	--	0.3532	0.830997
	Grey_Matter_Volume	Cross-Sectional	rs1659526	18	34644451	DTNA	a	g	846	0.223	-+	0.8233	0.917009
	Grey_Matter_Volume	Cross-Sectional	rs17642885	18	34649976	DTNA	t	c	846	-0.615	--	0.5386	0.907193
	Grey_Matter_Volume	Cross-Sectional	rs1240974	18	34650949	DTNA	t	c	846	0.493	++	0.6221	0.907193
	Grey_Matter_Volume	Cross-Sectional	rs55869511	18	34651262	DTNA	a	c	846	1.429	++	0.1531	0.633244
	Grey_Matter_Volume	Cross-Sectional	rs12955208	18	34656737	DTNA	a	g	846	-1.475	--	0.1403	0.633244
	Grey_Matter_Volume	Cross-Sectional	rs72953203	18	34660068	DTNA	a	g	846	2.05	++	0.04033	0.560258
	Grey_Matter_Volume	Cross-Sectional	rs9946070	18	34665505	DTNA	a	g	846	-0.413	--	0.6798	0.907193
	Grey_Matter_Volume	Cross-Sectional	rs72953211	18	34673381	DTNA	a	c	846	-0.467	--	0.6402	0.907193
	Grey_Matter_Volume	Cross-Sectional	rs55971592	18	34697328	DTNA	a	g	846	1.089	++	0.2761	0.78761
	Grey_Matter_Volume	Cross-Sectional	rs78837792	18	34703359	DTNA	t	c	846	-0.441	--	0.6594	0.907193
	Grey_Matter_Volume	Cross-Sectional	rs11663468	18	34707936	DTNA	t	c	846	0.844	++	0.3986	0.830997
	Grey_Matter_Volume	Cross-Sectional	rs12963825	18	34709484	DTNA	a	g	846	-0.895	--	0.3708	0.830997
	Grey_Matter_Volume	Cross-Sectional	rs1480432	18	34727166	DTNA	t	g	846	-2.42	--	0.01553	0.354602
	Grey_Matter_Volume	Cross-Sectional	rs45556134	18	34729425	DTNA	a	g	846	-0.88	--	0.3788	0.830997
	Grey_Matter_Volume	Cross-Sectional	rs899828	18	34732688	DTNA	t	g	846	-0.142	+-	0.8872	0.957058
	Grey_Matter_Volume	Cross-Sectional	rs17556884	18	34736455	DTNA	t	c	846	1.323	++	0.1857	0.665679
	Grey_Matter_Volume	Cross-Sectional	rs1480428	18	34738732	DTNA	a	g	846	0.469	++	0.6391	0.907193
	Grey_Matter_Volume	Cross-Sectional	rs12957349	18	34739291	DTNA	t	c	846	-2.045	--	0.04088	0.560258
	Grey_Matter_Volume	Cross-Sectional	rs12608110	18	34752198	DTNA	a	g	846	0.105	+-	0.9164	0.961249
	Grey_Matter_Volume	Cross-Sectional	rs7228547	18	34760039	DTNA	a	g	846	-0.831	--	0.406	0.830997
	Grey_Matter_Volume	Cross-Sectional	rs8099437	18	34761448	DTNA	t	g	846	0.391	-+	0.6955	0.907193
	Grey_Matter_Volume	Cross-Sectional	rs72955132	18	34762382	DTNA	a	g	846	1.284	++	0.1992	0.681324
	Grey_Matter_Volume	Cross-Sectional	rs1817452	18	34776629	DTNA	t	c	846	-2.011	--	0.04429	0.560258
	Grey_Matter_Volume	Cross-Sectional	rs56404226	18	34778060	DTNA	a	g	846	-0.358	-+	0.7201	0.907193
	Grey_Matter_Volume	Cross-Sectional	rs72955175	18	34779045	DTNA	a	t	846	-1.417	--	0.1566	0.633244
	Grey_Matter_Volume	Cross-Sectional	rs12608251	18	34782906	DTNA	t	g	846	-0.483	-+	0.6294	0.907193
	Grey_Matter_Volume	Cross-Sectional	rs76880720	18	34791141	DTNA	a	c	846	1.95	++	0.05112	0.560258
	Grey_Matter_Volume	Cross-Sectional	rs9989533	18	34793909	DTNA	t	c	846	-0.049	-+	0.9606	0.967663
	Grey_Matter_Volume	Cross-Sectional	rs79500711	18	34794379	DTNA	a	g	846	-0.229	--	0.8189	0.917009
	Grey_Matter_Volume	Cross-Sectional	rs138856611	18	34801684	DTNA	t	g	846	-0.598	--	0.5496	0.907193
	Grey_Matter_Volume	Cross-Sectional	rs62097226	18	34804223	DTNA	a	t	846	-0.873	--	0.3827	0.830997
	Grey_Matter_Volume	Cross-Sectional	rs4458079	18	34806161	DTNA	t	c	846	-1.897	--	0.05784	0.560258
	Grey_Matter_Volume	Cross-Sectional	rs8086358	18	34813672	DTNA	t	g	846	1.324	++	0.1857	0.665679
	Grey_Matter_Volume	Cross-Sectional	rs72963047	18	34818804	DTNA	a	c	846	-1.384	--	0.1664	0.633244
	Grey_Matter_Volume	Cross-Sectional	rs17557660	18	34831178	DTNA	a	t	846	-0.304	+-	0.7614	0.907193
	Grey_Matter_Volume	Cross-Sectional	rs1790533	18	34831631	DTNA	a	g	846	-1.007	--	0.3138	0.811143
	Grey_Matter_Volume	Cross-Sectional	rs4799782	18	34841123	DTNA	a	g	846	0.838	++	0.4022	0.830997
	Grey_Matter_Volume	Cross-Sectional	rs1786604	18	34846264	DTNA	a	g	846	-1.394	--	0.1632	0.633244
	Grey_Matter_Volume	Cross-Sectional	rs7233779	18	34863262	DTNA	a	g	846	-0.075	-+	0.9402	0.961249
	Grey_Matter_Volume	Cross-Sectional	rs644982	18	34869793	DTNA	a	g	846	0.893	-+	0.3717	0.830997
	Grey_Matter_Volume	Cross-Sectional	rs11659517	18	34870978	DTNA	a	t	846	-1.92	--	0.05488	0.560258
	Grey_Matter_Volume	Cross-Sectional	rs524969	18	34872102	DTNA	a	t	846	0.965	+-	0.3346	0.830997
	Grey_Matter_Volume	Cross-Sectional	rs637914	18	34876135	DTNA	a	t	846	0.446	+-	0.6554	0.907193
	Grey_Matter_Volume	Cross-Sectional	rs9304141	18	34879143	DTNA	t	c	846	0.859	++	0.3902	0.830997
	Grey_Matter_Volume	Cross-Sectional	rs2288085	18	34879740	DTNA	a	g	846	0.301	-+	0.7633	0.907193
	Grey_Matter_Volume	Cross-Sectional	rs17558116	18	34882719	DTNA	t	c	846	-1.524	--	0.1276	0.633244
	Grey_Matter_Volume	Cross-Sectional	rs10502637	18	34890006	DTNA	t	c	846	0.466	++	0.6414	0.907193
	Grey_Matter_Volume	Cross-Sectional	rs149163416	18	34898841	DTNA	a	g	846	-0.526	--	0.5991	0.907193
	Grey_Matter_Volume	Cross-Sectional	20:33413780	20	33413780	SNTA1	a	t	846	0.889	+-	0.3741	0.830997
	Grey_Matter_Volume	Cross-Sectional	rs291683	20	33431611	SNTA1	t	c	846	-1.385	--	0.1661	0.633244
	Grey_Matter_Volume	Cross-Sectional	20:33433270	20	33433270	SNTA1	t	c	846	1.015	++	0.3099	0.811143
	Grey_Matter_Volume	Cross-Sectional	rs6141396	20	33436147	SNTA1	a	c	328	-0.154	-?	0.8777	0.954325
	Grey_Matter_Volume	Cross-Sectional	rs293721	20	33441633	SNTA1	t	c	846	0.484	-+	0.6283	0.907193
	Grey_Matter_Volume	Longitudinal	rs111599092	3	49465346	DAG1	a	g	309	-0.081	+-	0.9352	0.970182
	Grey_Matter_Volume	Longitudinal	rs73073015	3	49465733	DAG1	a	g	309	1.054	++	0.2921	0.722093
	Grey_Matter_Volume	Longitudinal	rs7611164	3	49471395	DAG1	t	g	309	-0.352	-+	0.7245	0.848346
	Grey_Matter_Volume	Longitudinal	rs1568661	3	49483525	DAG1	a	g	309	0.646	-+	0.5183	0.722093
	Grey_Matter_Volume	Longitudinal	rs7374731	3	49495661	DAG1	c	g	309	-0.934	-+	0.3505	0.722093
	Grey_Matter_Volume	Longitudinal	rs73074811	3	49516098	DAG1	a	t	309	0.065	-+	0.9485	0.970182
	Grey_Matter_Volume	Longitudinal	rs3870338	3	49519618	DAG1	a	g	309	0.646	-+	0.5183	0.722093
	Grey_Matter_Volume	Longitudinal	rs55935606	3	49528072	DAG1	a	g	309	0.724	+-	0.4693	0.722093
	Grey_Matter_Volume	Longitudinal	rs75153130	3	49530436	DAG1	a	c	309	0.352	+-	0.7245	0.848346
	Grey_Matter_Volume	Longitudinal	rs13079082	3	49537375	DAG1	c	g	309	-0.634	--	0.5259	0.722093
	Grey_Matter_Volume	Longitudinal	rs4052546	3	49538116	DAG1	c	g	309	0.934	+-	0.3505	0.722093
	Grey_Matter_Volume	Longitudinal	rs73074830	3	49539584	DAG1	a	c	309	-0.731	--	0.465	0.722093
	Grey_Matter_Volume	Longitudinal	rs114093899	3	49539955	DAG1	c	g	309	0.216	+-	0.8292	0.92358
	Grey_Matter_Volume	Longitudinal	rs9789109	18	26842291	AQP4	a	g	309	-1.377	--	0.1684	0.679446
	Grey_Matter_Volume	Longitudinal	rs10164026	18	26842362	AQP4	a	c	309	0.555	-+	0.5787	0.740952
	Grey_Matter_Volume	Longitudinal	rs4800270	18	26844933	AQP4	t	g	309	-1.863	--	0.06248	0.570691
	Grey_Matter_Volume	Longitudinal	rs79668602	18	26845488	AQP4	a	g	309	-0.884	--	0.3767	0.722093
	Grey_Matter_Volume	Longitudinal	rs12458416	18	26847267	AQP4	c	g	309	0.585	-+	0.5586	0.722093
	Grey_Matter_Volume	Longitudinal	rs12953446	18	26848521	AQP4	a	g	309	-2.214	--	0.02684	0.570691
	Grey_Matter_Volume	Longitudinal	rs67461489	18	26848876	AQP4	t	c	309	1.545	++	0.1224	0.679446
	Grey_Matter_Volume	Longitudinal	rs11661081	18	26850068	AQP4	a	c	309	1.515	++	0.1298	0.679446
	Grey_Matter_Volume	Longitudinal	rs3763043	18	26855854	AQP4	t	c	309	-0.148	+-	0.8827	0.968974
	Grey_Matter_Volume	Longitudinal	rs68006382	18	26856555	AQP4	a	g	309	-0.226	+-	0.8214	0.922392
	Grey_Matter_Volume	Longitudinal	rs335930	18	26856961	AQP4	a	c	309	1.97	++	0.04889	0.570691
	Grey_Matter_Volume	Longitudinal	rs71353405	18	26857429	AQP4	t	c	309	-0.897	--	0.3698	0.722093
	Grey_Matter_Volume	Longitudinal	rs162009	18	26864250	AQP4	a	g	309	-1.639	--	0.1012	0.66021
	Grey_Matter_Volume	Longitudinal	rs4800773	18	26865017	AQP4	a	g	309	-0.681	--	0.4957	0.722093
	Grey_Matter_Volume	Longitudinal	rs3875089	18	26865469	AQP4	t	c	309	2.355	++	0.01855	0.570691
	Grey_Matter_Volume	Longitudinal	rs72878787	18	26866517	AQP4	a	g	309	-1.425	--	0.1543	0.679446
	Grey_Matter_Volume	Longitudinal	rs162006	18	26866570	AQP4	t	c	309	-1.029	--	0.3034	0.722093
	Grey_Matter_Volume	Longitudinal	rs151244	18	26866755	AQP4	t	c	309	0.67	++	0.5031	0.722093
	Grey_Matter_Volume	Longitudinal	rs72878794	18	26866839	AQP4	t	c	309	0.84	++	0.4009	0.722093
	Grey_Matter_Volume	Longitudinal	rs9961118	18	26866901	AQP4	t	c	309	0.857	++	0.3916	0.722093
	Grey_Matter_Volume	Longitudinal	rs162004	18	26867972	AQP4	c	g	309	0.886	-+	0.3758	0.722093
	Grey_Matter_Volume	Longitudinal	rs72878799	18	26868165	AQP4	a	g	309	0.94	+-	0.3471	0.722093
	Grey_Matter_Volume	Longitudinal	rs11662318	18	26869056	AQP4	t	c	309	-0.486	--	0.6267	0.783615
	Grey_Matter_Volume	Longitudinal	rs151246	18	26869139	AQP4	t	g	309	1.141	++	0.2538	0.722093
	Grey_Matter_Volume	Longitudinal	rs491148	18	26869803	AQP4	a	g	309	0.952	++	0.3409	0.722093
	Grey_Matter_Volume	Longitudinal	rs162002	18	26871015	AQP4	a	g	309	0.844	++	0.3986	0.722093
	Grey_Matter_Volume	Longitudinal	rs162001	18	26871481	AQP4	a	c	309	-0.101	+-	0.9197	0.970182
	Grey_Matter_Volume	Longitudinal	rs3865411	18	26871684	AQP4	a	g	309	0.146	+-	0.8841	0.968974
	Grey_Matter_Volume	Longitudinal	rs162000	18	26872471	AQP4	a	c	309	-0.756	+-	0.4499	0.722093
	Grey_Matter_Volume	Longitudinal	rs12969503	18	26873564	AQP4	t	g	309	-0.627	--	0.5309	0.722093
	Grey_Matter_Volume	Longitudinal	rs8094228	18	26873767	AQP4	t	c	309	0.693	++	0.4885	0.722093
	Grey_Matter_Volume	Longitudinal	rs480647	18	26874290	AQP4	t	c	309	0.762	++	0.4463	0.722093
	Grey_Matter_Volume	Longitudinal	rs10502478	18	26874616	AQP4	a	c	309	0.477	++	0.6336	0.783615
	Grey_Matter_Volume	Longitudinal	rs7234562	18	34483685	DTNA	t	c	309	-0.815	--	0.4152	0.722093
	Grey_Matter_Volume	Longitudinal	rs79922046	18	34485536	DTNA	a	g	309	-0.136	+-	0.8919	0.969764
	Grey_Matter_Volume	Longitudinal	rs9955950	18	34485672	DTNA	t	c	309	0.853	++	0.3935	0.722093
	Grey_Matter_Volume	Longitudinal	rs12957028	18	34485948	DTNA	a	g	309	0.266	++	0.7901	0.900237
	Grey_Matter_Volume	Longitudinal	rs72639491	18	34491438	DTNA	a	g	309	-0.446	--	0.6557	0.802062
	Grey_Matter_Volume	Longitudinal	rs62097347	18	34492032	DTNA	c	g	309	-1.568	--	0.1169	0.679446
	Grey_Matter_Volume	Longitudinal	rs9961251	18	34492344	DTNA	t	c	309	0.097	-+	0.9224	0.970182
	Grey_Matter_Volume	Longitudinal	rs111846993	18	34494001	DTNA	t	c	309	-0.777	+-	0.4371	0.722093
	Grey_Matter_Volume	Longitudinal	rs4799769	18	34494577	DTNA	c	g	309	-0.367	--	0.7133	0.848346
	Grey_Matter_Volume	Longitudinal	rs8092794	18	34496273	DTNA	a	g	309	0.622	+-	0.534	0.722093
	Grey_Matter_Volume	Longitudinal	rs7243528	18	34497055	DTNA	t	c	309	-1.834	--	0.06665	0.570691
	Grey_Matter_Volume	Longitudinal	rs79972565	18	34497194	DTNA	t	g	309	-1.674	--	0.09408	0.653147
	Grey_Matter_Volume	Longitudinal	rs35839923	18	34497764	DTNA	a	g	309	0.979	+-	0.3276	0.722093
	Grey_Matter_Volume	Longitudinal	rs62097349	18	34499519	DTNA	a	g	309	1.016	++	0.3096	0.722093
	Grey_Matter_Volume	Longitudinal	rs9965622	18	34502153	DTNA	t	c	309	0.046	+-	0.9631	0.970182
	Grey_Matter_Volume	Longitudinal	rs62098462	18	34504364	DTNA	t	c	309	0.597	-+	0.5507	0.722093
	Grey_Matter_Volume	Longitudinal	rs75127284	18	34506592	DTNA	a	c	309	0.282	+-	0.7783	0.896026
	Grey_Matter_Volume	Longitudinal	rs2439861	18	34507940	DTNA	a	g	309	-1.244	--	0.2133	0.722093
	Grey_Matter_Volume	Longitudinal	rs35982920	18	34516411	DTNA	a	g	309	-0.804	-+	0.4216	0.722093
	Grey_Matter_Volume	Longitudinal	rs2509597	18	34528430	DTNA	a	t	309	-1.158	--	0.247	0.722093
	Grey_Matter_Volume	Longitudinal	rs71363449	18	34531997	DTNA	t	c	309	0.523	++	0.6013	0.76276
	Grey_Matter_Volume	Longitudinal	rs2439853	18	34533937	DTNA	a	g	309	1.668	++	0.09535	0.653147
	Grey_Matter_Volume	Longitudinal	rs2439000	18	34536414	DTNA	c	g	309	-1.9	--	0.05744	0.570691
	Grey_Matter_Volume	Longitudinal	rs11875892	18	34544032	DTNA	a	g	309	0.108	-+	0.9142	0.970182
	Grey_Matter_Volume	Longitudinal	rs1967583	18	34544573	DTNA	t	c	309	-0.729	--	0.4662	0.722093
	Grey_Matter_Volume	Longitudinal	rs28856895	18	34555507	DTNA	a	g	309	1.289	++	0.1974	0.711679
	Grey_Matter_Volume	Longitudinal	rs77973497	18	34560529	DTNA	a	c	309	0.725	++	0.4687	0.722093
	Grey_Matter_Volume	Longitudinal	rs2579796	18	34569243	DTNA	a	g	309	1.908	++	0.05635	0.570691
	Grey_Matter_Volume	Longitudinal	rs2579797	18	34571732	DTNA	t	g	309	1.911	++	0.05601	0.570691
	Grey_Matter_Volume	Longitudinal	rs2685557	18	34576782	DTNA	t	c	309	1.958	++	0.05028	0.570691
	Grey_Matter_Volume	Longitudinal	rs9958492	18	34577783	DTNA	t	c	309	0.618	++	0.5364	0.722093
	Grey_Matter_Volume	Longitudinal	rs2579802	18	34579787	DTNA	a	c	309	1.234	++	0.217	0.722093
	Grey_Matter_Volume	Longitudinal	rs74920018	18	34607557	DTNA	a	t	309	0.798	++	0.4251	0.722093
	Grey_Matter_Volume	Longitudinal	rs1439127	18	34607759	DTNA	a	t	309	-1.394	--	0.1632	0.679446
	Grey_Matter_Volume	Longitudinal	rs12327368	18	34611361	DTNA	a	g	309	0.828	++	0.4077	0.722093
	Grey_Matter_Volume	Longitudinal	rs62097188	18	34611412	DTNA	a	g	309	1.335	-+	0.182	0.679446
	Grey_Matter_Volume	Longitudinal	rs9807153	18	34635520	DTNA	a	t	309	-1.354	--	0.1757	0.679446
	Grey_Matter_Volume	Longitudinal	rs2730126	18	34635939	DTNA	a	c	309	1.408	++	0.1592	0.679446
	Grey_Matter_Volume	Longitudinal	rs1659526	18	34644451	DTNA	a	g	309	0.599	++	0.5489	0.722093
	Grey_Matter_Volume	Longitudinal	rs17642885	18	34649976	DTNA	t	c	309	0.987	-+	0.3238	0.722093
	Grey_Matter_Volume	Longitudinal	rs1240974	18	34650949	DTNA	t	c	309	0.585	-+	0.5587	0.722093
	Grey_Matter_Volume	Longitudinal	rs55869511	18	34651262	DTNA	a	c	309	0.317	+-	0.751	0.871924
	Grey_Matter_Volume	Longitudinal	rs12955208	18	34656737	DTNA	a	g	309	0.902	++	0.367	0.722093
	Grey_Matter_Volume	Longitudinal	rs72953203	18	34660068	DTNA	a	g	309	1.218	++	0.2231	0.722093
	Grey_Matter_Volume	Longitudinal	rs9946070	18	34665505	DTNA	a	g	309	1.125	++	0.2607	0.722093
	Grey_Matter_Volume	Longitudinal	rs72953211	18	34673381	DTNA	a	c	309	-0.673	+-	0.5008	0.722093
	Grey_Matter_Volume	Longitudinal	rs55971592	18	34697328	DTNA	a	g	309	-2.156	--	0.03107	0.570691
	Grey_Matter_Volume	Longitudinal	rs78837792	18	34703359	DTNA	t	c	309	-1.854	--	0.0638	0.570691
	Grey_Matter_Volume	Longitudinal	rs11663468	18	34707936	DTNA	t	c	309	0.912	++	0.3618	0.722093
	Grey_Matter_Volume	Longitudinal	rs12963825	18	34709484	DTNA	a	g	309	0.677	++	0.4984	0.722093
	Grey_Matter_Volume	Longitudinal	rs1480432	18	34727166	DTNA	t	g	309	0.891	++	0.373	0.722093
	Grey_Matter_Volume	Longitudinal	rs45556134	18	34729425	DTNA	a	g	309	3.796	++	0.0001473	0.0201801
	Grey_Matter_Volume	Longitudinal	rs899828	18	34732688	DTNA	t	g	309	-0.429	--	0.6677	0.808901
	Grey_Matter_Volume	Longitudinal	rs17556884	18	34736455	DTNA	t	c	309	-1.029	--	0.3037	0.722093
	Grey_Matter_Volume	Longitudinal	rs1480428	18	34738732	DTNA	a	g	309	-1.33	--	0.1834	0.679446
	Grey_Matter_Volume	Longitudinal	rs12957349	18	34739291	DTNA	t	c	309	0.679	++	0.4969	0.722093
	Grey_Matter_Volume	Longitudinal	rs12608110	18	34752198	DTNA	a	g	309	-0.612	--	0.5408	0.722093
	Grey_Matter_Volume	Longitudinal	rs7228547	18	34760039	DTNA	a	g	309	-0.628	+-	0.5301	0.722093
	Grey_Matter_Volume	Longitudinal	rs8099437	18	34761448	DTNA	t	g	309	-1.33	--	0.1834	0.679446
	Grey_Matter_Volume	Longitudinal	rs72955132	18	34762382	DTNA	a	g	309	-1.703	--	0.0885	0.653147
	Grey_Matter_Volume	Longitudinal	rs1817452	18	34776629	DTNA	t	c	309	0.475	++	0.6349	0.783615
	Grey_Matter_Volume	Longitudinal	rs56404226	18	34778060	DTNA	a	g	309	-0.052	--	0.9588	0.970182
	Grey_Matter_Volume	Longitudinal	rs72955175	18	34779045	DTNA	a	t	309	-0.897	--	0.3697	0.722093
	Grey_Matter_Volume	Longitudinal	rs12608251	18	34782906	DTNA	t	g	309	0.853	++	0.3938	0.722093
	Grey_Matter_Volume	Longitudinal	rs76880720	18	34791141	DTNA	a	c	309	-0.63	--	0.5289	0.722093
	Grey_Matter_Volume	Longitudinal	rs9989533	18	34793909	DTNA	t	c	309	0.057	+-	0.9547	0.970182
	Grey_Matter_Volume	Longitudinal	rs79500711	18	34794379	DTNA	a	g	309	2.618	++	0.008832	0.570691
	Grey_Matter_Volume	Longitudinal	rs138856611	18	34801684	DTNA	t	g	309	2.103	++	0.0355	0.570691
	Grey_Matter_Volume	Longitudinal	rs62097226	18	34804223	DTNA	a	t	309	0.651	++	0.5153	0.722093
	Grey_Matter_Volume	Longitudinal	rs4458079	18	34806161	DTNA	t	c	309	-1.991	--	0.04644	0.570691
	Grey_Matter_Volume	Longitudinal	rs8086358	18	34813672	DTNA	t	g	309	0.891	++	0.373	0.722093
	Grey_Matter_Volume	Longitudinal	rs72963047	18	34818804	DTNA	a	c	309	-1.085	+-	0.278	0.722093
	Grey_Matter_Volume	Longitudinal	rs17557660	18	34831178	DTNA	a	t	309	0.061	+-	0.9515	0.970182
	Grey_Matter_Volume	Longitudinal	rs1790533	18	34831631	DTNA	a	g	309	0.894	++	0.3711	0.722093
	Grey_Matter_Volume	Longitudinal	rs4799782	18	34841123	DTNA	a	g	309	-2.253	--	0.02426	0.570691
	Grey_Matter_Volume	Longitudinal	rs1786604	18	34846264	DTNA	a	g	309	-1.399	--	0.1617	0.679446
	Grey_Matter_Volume	Longitudinal	rs7233779	18	34863262	DTNA	a	g	309	-1.151	--	0.2496	0.722093
	Grey_Matter_Volume	Longitudinal	rs644982	18	34869793	DTNA	a	g	309	1.702	++	0.08884	0.653147
	Grey_Matter_Volume	Longitudinal	rs11659517	18	34870978	DTNA	a	t	309	0.592	++	0.5536	0.722093
	Grey_Matter_Volume	Longitudinal	rs524969	18	34872102	DTNA	a	t	309	-1.338	--	0.181	0.679446
	Grey_Matter_Volume	Longitudinal	rs637914	18	34876135	DTNA	a	t	309	-0.069	+-	0.9452	0.970182
	Grey_Matter_Volume	Longitudinal	rs9304141	18	34879143	DTNA	t	c	309	-0.98	--	0.3269	0.722093
	Grey_Matter_Volume	Longitudinal	rs2288085	18	34879740	DTNA	a	g	309	1.131	-+	0.2581	0.722093
	Grey_Matter_Volume	Longitudinal	rs17558116	18	34882719	DTNA	t	c	309	-1.221	--	0.2222	0.722093
	Grey_Matter_Volume	Longitudinal	rs10502637	18	34890006	DTNA	t	c	309	-1.343	--	0.1792	0.679446
	Grey_Matter_Volume	Longitudinal	rs149163416	18	34898841	DTNA	a	g	309	0.422	-+	0.6731	0.808901
	Grey_Matter_Volume	Longitudinal	20:33413780	20	33413780	SNTA1	a	t	309	0.26	-+	0.7951	0.900237
	Grey_Matter_Volume	Longitudinal	rs291683	20	33431611	SNTA1	t	c	309	1.534	++	0.1251	0.679446
	Grey_Matter_Volume	Longitudinal	20:33433270	20	33433270	SNTA1	t	c	309	-1.33	--	0.1835	0.679446
	Grey_Matter_Volume	Longitudinal	rs6141396	20	33436147	SNTA1	a	c	169	-0.01	-?	0.9917	0.9917
	Grey_Matter_Volume	Longitudinal	rs293721	20	33441633	SNTA1	t	c	309	0.895	+-	0.371	0.722093
	Hippocampal_Volume	Cross-Sectional	rs111599092	3	49465346	DAG1	a	g	846	1.23	++	0.2187	0.779307
	Hippocampal_Volume	Cross-Sectional	rs73073015	3	49465733	DAG1	a	g	846	0.672	++	0.5013	0.891923
	Hippocampal_Volume	Cross-Sectional	rs7611164	3	49471395	DAG1	t	g	846	0.899	-+	0.3684	0.820895
	Hippocampal_Volume	Cross-Sectional	rs1568661	3	49483525	DAG1	a	g	846	-0.687	--	0.4923	0.887436
	Hippocampal_Volume	Cross-Sectional	rs7374731	3	49495661	DAG1	c	g	846	-1.19	--	0.234	0.779307
	Hippocampal_Volume	Cross-Sectional	rs73074811	3	49516098	DAG1	a	t	846	1.616	++	0.106	0.779307
	Hippocampal_Volume	Cross-Sectional	rs3870338	3	49519618	DAG1	a	g	846	-0.687	--	0.4923	0.887436
	Hippocampal_Volume	Cross-Sectional	rs55935606	3	49528072	DAG1	a	g	846	1.987	++	0.04697	0.779307
	Hippocampal_Volume	Cross-Sectional	rs75153130	3	49530436	DAG1	a	c	846	-0.899	+-	0.3684	0.820895
	Hippocampal_Volume	Cross-Sectional	rs13079082	3	49537375	DAG1	c	g	846	-1.26	--	0.2076	0.779307
	Hippocampal_Volume	Cross-Sectional	rs4052546	3	49538116	DAG1	c	g	846	1.19	++	0.234	0.779307
	Hippocampal_Volume	Cross-Sectional	rs73074830	3	49539584	DAG1	a	c	846	-0.763	--	0.4453	0.844145
	Hippocampal_Volume	Cross-Sectional	rs114093899	3	49539955	DAG1	c	g	846	1.059	++	0.2898	0.810257
	Hippocampal_Volume	Cross-Sectional	rs9789109	18	26842291	AQP4	a	g	846	0.127	-+	0.8991	0.97355
	Hippocampal_Volume	Cross-Sectional	rs10164026	18	26842362	AQP4	a	c	846	1.22	++	0.2225	0.779307
	Hippocampal_Volume	Cross-Sectional	rs4800270	18	26844933	AQP4	t	g	846	0.939	+-	0.3479	0.820895
	Hippocampal_Volume	Cross-Sectional	rs79668602	18	26845488	AQP4	a	g	846	-0.588	-+	0.5563	0.897424
	Hippocampal_Volume	Cross-Sectional	rs12458416	18	26847267	AQP4	c	g	846	0.224	-+	0.823	0.959334
	Hippocampal_Volume	Cross-Sectional	rs12953446	18	26848521	AQP4	a	g	846	-0.445	--	0.6565	0.927222
	Hippocampal_Volume	Cross-Sectional	rs67461489	18	26848876	AQP4	t	c	846	1.609	++	0.1075	0.779307
	Hippocampal_Volume	Cross-Sectional	rs11661081	18	26850068	AQP4	a	c	846	-0.621	-+	0.5348	0.897424
	Hippocampal_Volume	Cross-Sectional	rs3763043	18	26855854	AQP4	t	c	846	-0.046	+-	0.9633	0.984866
	Hippocampal_Volume	Cross-Sectional	rs68006382	18	26856555	AQP4	a	g	846	-0.07	+-	0.9439	0.984866
	Hippocampal_Volume	Cross-Sectional	rs335930	18	26856961	AQP4	a	c	846	-0.517	--	0.605	0.897424
	Hippocampal_Volume	Cross-Sectional	rs71353405	18	26857429	AQP4	t	c	846	-0.264	--	0.792	0.951137
	Hippocampal_Volume	Cross-Sectional	rs162009	18	26864250	AQP4	a	g	846	-0.532	-+	0.5945	0.897424
	Hippocampal_Volume	Cross-Sectional	rs4800773	18	26865017	AQP4	a	g	846	-0.406	-+	0.6844	0.930331
	Hippocampal_Volume	Cross-Sectional	rs3875089	18	26865469	AQP4	t	c	846	1.383	++	0.1667	0.779307
	Hippocampal_Volume	Cross-Sectional	rs72878787	18	26866517	AQP4	a	g	846	0.799	+-	0.4241	0.844145
	Hippocampal_Volume	Cross-Sectional	rs162006	18	26866570	AQP4	t	c	846	0.255	+-	0.7984	0.951137
	Hippocampal_Volume	Cross-Sectional	rs151244	18	26866755	AQP4	t	c	846	-0.543	+-	0.5868	0.897424
	Hippocampal_Volume	Cross-Sectional	rs72878794	18	26866839	AQP4	t	c	846	0.209	-+	0.8342	0.959334
	Hippocampal_Volume	Cross-Sectional	rs9961118	18	26866901	AQP4	t	c	846	-0.427	+-	0.6695	0.928971
	Hippocampal_Volume	Cross-Sectional	rs162004	18	26867972	AQP4	c	g	846	-1.481	--	0.1387	0.779307
	Hippocampal_Volume	Cross-Sectional	rs72878799	18	26868165	AQP4	a	g	846	-0.05	+-	0.9599	0.984866
	Hippocampal_Volume	Cross-Sectional	rs11662318	18	26869056	AQP4	t	c	846	-1.164	--	0.2446	0.779307
	Hippocampal_Volume	Cross-Sectional	rs151246	18	26869139	AQP4	t	g	846	-0.556	+-	0.5785	0.897424
	Hippocampal_Volume	Cross-Sectional	rs491148	18	26869803	AQP4	a	g	846	1.021	+-	0.3072	0.820895
	Hippocampal_Volume	Cross-Sectional	rs162002	18	26871015	AQP4	a	g	846	0.111	+-	0.9117	0.97355
	Hippocampal_Volume	Cross-Sectional	rs162001	18	26871481	AQP4	a	c	846	0.768	++	0.4427	0.844145
	Hippocampal_Volume	Cross-Sectional	rs3865411	18	26871684	AQP4	a	g	846	0.796	++	0.4263	0.844145
	Hippocampal_Volume	Cross-Sectional	rs162000	18	26872471	AQP4	a	c	846	0.912	++	0.3615	0.820895
	Hippocampal_Volume	Cross-Sectional	rs12969503	18	26873564	AQP4	t	g	846	0.279	-+	0.7805	0.951137
	Hippocampal_Volume	Cross-Sectional	rs8094228	18	26873767	AQP4	t	c	846	-0.105	+-	0.9167	0.97355
	Hippocampal_Volume	Cross-Sectional	rs480647	18	26874290	AQP4	t	c	846	-1.326	--	0.1848	0.779307
	Hippocampal_Volume	Cross-Sectional	rs10502478	18	26874616	AQP4	a	c	846	1.41	++	0.1587	0.779307
	Hippocampal_Volume	Cross-Sectional	rs7234562	18	34483685	DTNA	t	c	846	-1.177	--	0.2392	0.779307
	Hippocampal_Volume	Cross-Sectional	rs79922046	18	34485536	DTNA	a	g	846	-1.545	--	0.1223	0.779307
	Hippocampal_Volume	Cross-Sectional	rs9955950	18	34485672	DTNA	t	c	846	-0.186	-+	0.8521	0.959334
	Hippocampal_Volume	Cross-Sectional	rs12957028	18	34485948	DTNA	a	g	846	2.16	++	0.03076	0.779307
	Hippocampal_Volume	Cross-Sectional	rs72639491	18	34491438	DTNA	a	g	846	0.134	+-	0.8933	0.97355
	Hippocampal_Volume	Cross-Sectional	rs62097347	18	34492032	DTNA	c	g	846	-0.348	+-	0.7276	0.930331
	Hippocampal_Volume	Cross-Sectional	rs9961251	18	34492344	DTNA	t	c	846	-0.633	+-	0.5267	0.897424
	Hippocampal_Volume	Cross-Sectional	rs111846993	18	34494001	DTNA	t	c	846	1.1	-+	0.2713	0.808002
	Hippocampal_Volume	Cross-Sectional	rs4799769	18	34494577	DTNA	c	g	846	0.532	-+	0.595	0.897424
	Hippocampal_Volume	Cross-Sectional	rs8092794	18	34496273	DTNA	a	g	846	-0.35	+-	0.7266	0.930331
	Hippocampal_Volume	Cross-Sectional	rs7243528	18	34497055	DTNA	t	c	846	-0.175	-+	0.8613	0.959334
	Hippocampal_Volume	Cross-Sectional	rs79972565	18	34497194	DTNA	t	g	846	0.341	-+	0.7334	0.930331
	Hippocampal_Volume	Cross-Sectional	rs35839923	18	34497764	DTNA	a	g	846	-1.341	--	0.1799	0.779307
	Hippocampal_Volume	Cross-Sectional	rs62097349	18	34499519	DTNA	a	g	846	-1.656	--	0.09775	0.779307
	Hippocampal_Volume	Cross-Sectional	rs9965622	18	34502153	DTNA	t	c	846	-1.086	--	0.2773	0.8083
	Hippocampal_Volume	Cross-Sectional	rs62098462	18	34504364	DTNA	t	c	846	-0.756	--	0.4498	0.844145
	Hippocampal_Volume	Cross-Sectional	rs75127284	18	34506592	DTNA	a	c	846	0.178	++	0.8587	0.959334
	Hippocampal_Volume	Cross-Sectional	rs2439861	18	34507940	DTNA	a	g	846	0.567	++	0.5706	0.897424
	Hippocampal_Volume	Cross-Sectional	rs35982920	18	34516411	DTNA	a	g	846	1.386	++	0.1659	0.779307
	Hippocampal_Volume	Cross-Sectional	rs2509597	18	34528430	DTNA	a	t	846	1.571	++	0.1163	0.779307
	Hippocampal_Volume	Cross-Sectional	rs71363449	18	34531997	DTNA	t	c	846	0.125	-+	0.9008	0.97355
	Hippocampal_Volume	Cross-Sectional	rs2439853	18	34533937	DTNA	a	g	846	-0.511	--	0.6092	0.897424
	Hippocampal_Volume	Cross-Sectional	rs2439000	18	34536414	DTNA	c	g	846	0.527	++	0.598	0.897424
	Hippocampal_Volume	Cross-Sectional	rs11875892	18	34544032	DTNA	a	g	846	2.203	++	0.02763	0.779307
	Hippocampal_Volume	Cross-Sectional	rs1967583	18	34544573	DTNA	t	c	846	-1.688	--	0.09141	0.779307
	Hippocampal_Volume	Cross-Sectional	rs28856895	18	34555507	DTNA	a	g	846	0.703	+-	0.4823	0.887436
	Hippocampal_Volume	Cross-Sectional	rs77973497	18	34560529	DTNA	a	c	846	-0.926	--	0.3543	0.820895
	Hippocampal_Volume	Cross-Sectional	rs2579796	18	34569243	DTNA	a	g	846	-0.651	--	0.5149	0.897424
	Hippocampal_Volume	Cross-Sectional	rs2579797	18	34571732	DTNA	t	g	846	-0.596	--	0.5514	0.897424
	Hippocampal_Volume	Cross-Sectional	rs2685557	18	34576782	DTNA	t	c	846	-0.833	--	0.405	0.844145
	Hippocampal_Volume	Cross-Sectional	rs9958492	18	34577783	DTNA	t	c	846	-0.806	--	0.4204	0.844145
	Hippocampal_Volume	Cross-Sectional	rs2579802	18	34579787	DTNA	a	c	846	-0.968	--	0.333	0.820895
	Hippocampal_Volume	Cross-Sectional	rs74920018	18	34607557	DTNA	a	t	846	-0.013	+-	0.9894	0.999294
	Hippocampal_Volume	Cross-Sectional	rs1439127	18	34607759	DTNA	a	t	846	-0.522	+-	0.6015	0.897424
	Hippocampal_Volume	Cross-Sectional	rs12327368	18	34611361	DTNA	a	g	846	-0.945	--	0.3445	0.820895
	Hippocampal_Volume	Cross-Sectional	rs62097188	18	34611412	DTNA	a	g	846	-1.447	--	0.1479	0.779307
	Hippocampal_Volume	Cross-Sectional	rs9807153	18	34635520	DTNA	a	t	846	2.02	++	0.04338	0.779307
	Hippocampal_Volume	Cross-Sectional	rs2730126	18	34635939	DTNA	a	c	846	-1.362	--	0.1731	0.779307
	Hippocampal_Volume	Cross-Sectional	rs1659526	18	34644451	DTNA	a	g	846	-0.894	--	0.3715	0.820895
	Hippocampal_Volume	Cross-Sectional	rs17642885	18	34649976	DTNA	t	c	846	0.292	-+	0.7705	0.951137
	Hippocampal_Volume	Cross-Sectional	rs1240974	18	34650949	DTNA	t	c	846	-1.469	--	0.1419	0.779307
	Hippocampal_Volume	Cross-Sectional	rs55869511	18	34651262	DTNA	a	c	846	1.507	++	0.1319	0.779307
	Hippocampal_Volume	Cross-Sectional	rs12955208	18	34656737	DTNA	a	g	846	0.451	++	0.6519	0.927222
	Hippocampal_Volume	Cross-Sectional	rs72953203	18	34660068	DTNA	a	g	846	1.387	++	0.1655	0.779307
	Hippocampal_Volume	Cross-Sectional	rs9946070	18	34665505	DTNA	a	g	846	-0.961	--	0.3366	0.820895
	Hippocampal_Volume	Cross-Sectional	rs72953211	18	34673381	DTNA	a	c	846	0.048	-+	0.9615	0.984866
	Hippocampal_Volume	Cross-Sectional	rs55971592	18	34697328	DTNA	a	g	846	1.762	++	0.07814	0.779307
	Hippocampal_Volume	Cross-Sectional	rs78837792	18	34703359	DTNA	t	c	846	-1.562	--	0.1183	0.779307
	Hippocampal_Volume	Cross-Sectional	rs11663468	18	34707936	DTNA	t	c	846	0.001	+-	0.9996	0.9996
	Hippocampal_Volume	Cross-Sectional	rs12963825	18	34709484	DTNA	a	g	846	-2.451	--	0.01425	0.779307
	Hippocampal_Volume	Cross-Sectional	rs1480432	18	34727166	DTNA	t	g	846	-0.388	--	0.6979	0.930331
	Hippocampal_Volume	Cross-Sectional	rs45556134	18	34729425	DTNA	a	g	846	0.4	-+	0.6891	0.930331
	Hippocampal_Volume	Cross-Sectional	rs899828	18	34732688	DTNA	t	g	846	-1.414	--	0.1573	0.779307
	Hippocampal_Volume	Cross-Sectional	rs17556884	18	34736455	DTNA	t	c	846	1.21	++	0.2261	0.779307
	Hippocampal_Volume	Cross-Sectional	rs1480428	18	34738732	DTNA	a	g	846	0.853	++	0.3939	0.843192
	Hippocampal_Volume	Cross-Sectional	rs12957349	18	34739291	DTNA	t	c	846	0.538	++	0.5904	0.897424
	Hippocampal_Volume	Cross-Sectional	rs12608110	18	34752198	DTNA	a	g	846	0.362	++	0.7174	0.930331
	Hippocampal_Volume	Cross-Sectional	rs7228547	18	34760039	DTNA	a	g	846	0.187	++	0.8519	0.959334
	Hippocampal_Volume	Cross-Sectional	rs8099437	18	34761448	DTNA	t	g	846	0.96	++	0.3371	0.820895
	Hippocampal_Volume	Cross-Sectional	rs72955132	18	34762382	DTNA	a	g	846	1.108	++	0.2677	0.808002
	Hippocampal_Volume	Cross-Sectional	rs1817452	18	34776629	DTNA	t	c	846	1.13	++	0.2585	0.804875
	Hippocampal_Volume	Cross-Sectional	rs56404226	18	34778060	DTNA	a	g	846	-0.94	--	0.347	0.820895
	Hippocampal_Volume	Cross-Sectional	rs72955175	18	34779045	DTNA	a	t	846	-0.424	+-	0.6713	0.928971
	Hippocampal_Volume	Cross-Sectional	rs12608251	18	34782906	DTNA	t	g	846	1.012	++	0.3118	0.820895
	Hippocampal_Volume	Cross-Sectional	rs76880720	18	34791141	DTNA	a	c	846	-0.344	--	0.7305	0.930331
	Hippocampal_Volume	Cross-Sectional	rs9989533	18	34793909	DTNA	t	c	846	0.273	++	0.7851	0.951137
	Hippocampal_Volume	Cross-Sectional	rs79500711	18	34794379	DTNA	a	g	846	1.302	++	0.193	0.779307
	Hippocampal_Volume	Cross-Sectional	rs138856611	18	34801684	DTNA	t	g	846	-0.777	--	0.4372	0.844145
	Hippocampal_Volume	Cross-Sectional	rs62097226	18	34804223	DTNA	a	t	846	-2.004	--	0.04507	0.779307
	Hippocampal_Volume	Cross-Sectional	rs4458079	18	34806161	DTNA	t	c	846	-1.968	--	0.04906	0.779307
	Hippocampal_Volume	Cross-Sectional	rs8086358	18	34813672	DTNA	t	g	846	-0.114	-+	0.9094	0.97355
	Hippocampal_Volume	Cross-Sectional	rs72963047	18	34818804	DTNA	a	c	846	-1.654	--	0.09823	0.779307
	Hippocampal_Volume	Cross-Sectional	rs17557660	18	34831178	DTNA	a	t	846	-0.856	--	0.3919	0.843192
	Hippocampal_Volume	Cross-Sectional	rs1790533	18	34831631	DTNA	a	g	846	0.364	++	0.7161	0.930331
	Hippocampal_Volume	Cross-Sectional	rs4799782	18	34841123	DTNA	a	g	846	0.537	++	0.5916	0.897424
	Hippocampal_Volume	Cross-Sectional	rs1786604	18	34846264	DTNA	a	g	846	0.058	+-	0.9535	0.984866
	Hippocampal_Volume	Cross-Sectional	rs7233779	18	34863262	DTNA	a	g	846	-1.845	--	0.06506	0.779307
	Hippocampal_Volume	Cross-Sectional	rs644982	18	34869793	DTNA	a	g	846	0.28	-+	0.7798	0.951137
	Hippocampal_Volume	Cross-Sectional	rs11659517	18	34870978	DTNA	a	t	846	0.802	++	0.4225	0.844145
	Hippocampal_Volume	Cross-Sectional	rs524969	18	34872102	DTNA	a	t	846	-1.254	--	0.2099	0.779307
	Hippocampal_Volume	Cross-Sectional	rs637914	18	34876135	DTNA	a	t	846	-1.197	--	0.2313	0.779307
	Hippocampal_Volume	Cross-Sectional	rs9304141	18	34879143	DTNA	t	c	846	-0.177	-+	0.8591	0.959334
	Hippocampal_Volume	Cross-Sectional	rs2288085	18	34879740	DTNA	a	g	846	-0.22	-+	0.8261	0.959334
	Hippocampal_Volume	Cross-Sectional	rs17558116	18	34882719	DTNA	t	c	846	-0.463	--	0.6432	0.927222
	Hippocampal_Volume	Cross-Sectional	rs10502637	18	34890006	DTNA	t	c	846	-1.378	--	0.1683	0.779307
	Hippocampal_Volume	Cross-Sectional	rs149163416	18	34898841	DTNA	a	g	846	-0.01	+-	0.992	0.999294
	Hippocampal_Volume	Cross-Sectional	20:33413780	20	33413780	SNTA1	a	t	846	1.722	++	0.08512	0.779307
	Hippocampal_Volume	Cross-Sectional	rs291683	20	33431611	SNTA1	t	c	846	-1.06	--	0.2891	0.810257
	Hippocampal_Volume	Cross-Sectional	20:33433270	20	33433270	SNTA1	t	c	846	0.477	-+	0.6337	0.923584
	Hippocampal_Volume	Cross-Sectional	rs6141396	20	33436147	SNTA1	a	c	328	-1.787	-?	0.07386	0.779307
	Hippocampal_Volume	Cross-Sectional	rs293721	20	33441633	SNTA1	t	c	846	0.323	++	0.7464	0.938136
	Hippocampal_Volume	Longitudinal	rs111599092	3	49465346	DAG1	a	g	309	0.771	++	0.4408	0.716701
	Hippocampal_Volume	Longitudinal	rs73073015	3	49465733	DAG1	a	g	309	1.728	++	0.08406	0.634516
	Hippocampal_Volume	Longitudinal	rs7611164	3	49471395	DAG1	t	g	309	0.241	-+	0.8096	0.921325
	Hippocampal_Volume	Longitudinal	rs1568661	3	49483525	DAG1	a	g	309	-1.164	-+	0.2444	0.649696
	Hippocampal_Volume	Longitudinal	rs7374731	3	49495661	DAG1	c	g	309	-1.024	-+	0.3059	0.696156
	Hippocampal_Volume	Longitudinal	rs73074811	3	49516098	DAG1	a	t	309	0.009	-+	0.9932	0.9932
	Hippocampal_Volume	Longitudinal	rs3870338	3	49519618	DAG1	a	g	309	-1.164	-+	0.2444	0.649696
	Hippocampal_Volume	Longitudinal	rs55935606	3	49528072	DAG1	a	g	309	1.099	++	0.2717	0.67678
	Hippocampal_Volume	Longitudinal	rs75153130	3	49530436	DAG1	a	c	309	-0.241	+-	0.8096	0.921325
	Hippocampal_Volume	Longitudinal	rs13079082	3	49537375	DAG1	c	g	309	-1.014	--	0.3104	0.696156
	Hippocampal_Volume	Longitudinal	rs4052546	3	49538116	DAG1	c	g	309	1.024	+-	0.3059	0.696156
	Hippocampal_Volume	Longitudinal	rs73074830	3	49539584	DAG1	a	c	309	-0.316	-+	0.7518	0.872853
	Hippocampal_Volume	Longitudinal	rs114093899	3	49539955	DAG1	c	g	309	-0.218	+-	0.8275	0.921325
	Hippocampal_Volume	Longitudinal	rs9789109	18	26842291	AQP4	a	g	309	-0.563	-+	0.5736	0.785832
	Hippocampal_Volume	Longitudinal	rs10164026	18	26842362	AQP4	a	c	309	0.21	-+	0.8339	0.921325
	Hippocampal_Volume	Longitudinal	rs4800270	18	26844933	AQP4	t	g	309	-0.348	--	0.7278	0.872853
	Hippocampal_Volume	Longitudinal	rs79668602	18	26845488	AQP4	a	g	309	-0.979	--	0.3276	0.696156
	Hippocampal_Volume	Longitudinal	rs12458416	18	26847267	AQP4	c	g	309	0.817	-+	0.4141	0.716701
	Hippocampal_Volume	Longitudinal	rs12953446	18	26848521	AQP4	a	g	309	-0.96	--	0.3371	0.696156
	Hippocampal_Volume	Longitudinal	rs67461489	18	26848876	AQP4	t	c	309	0.49	++	0.6244	0.809452
	Hippocampal_Volume	Longitudinal	rs11661081	18	26850068	AQP4	a	c	309	1.325	++	0.1852	0.635805
	Hippocampal_Volume	Longitudinal	rs3763043	18	26855854	AQP4	t	c	309	-1.033	--	0.3016	0.696156
	Hippocampal_Volume	Longitudinal	rs68006382	18	26856555	AQP4	a	g	309	0.52	++	0.6033	0.802448
	Hippocampal_Volume	Longitudinal	rs335930	18	26856961	AQP4	a	c	309	0.658	+-	0.5103	0.760648
	Hippocampal_Volume	Longitudinal	rs71353405	18	26857429	AQP4	t	c	309	-0.764	--	0.445	0.716701
	Hippocampal_Volume	Longitudinal	rs162009	18	26864250	AQP4	a	g	309	-0.597	--	0.5503	0.782561
	Hippocampal_Volume	Longitudinal	rs4800773	18	26865017	AQP4	a	g	309	-0.658	+-	0.5108	0.760648
	Hippocampal_Volume	Longitudinal	rs3875089	18	26865469	AQP4	t	c	309	0.32	++	0.7491	0.872853
	Hippocampal_Volume	Longitudinal	rs72878787	18	26866517	AQP4	a	g	309	-0.022	-+	0.9826	0.9932
	Hippocampal_Volume	Longitudinal	rs162006	18	26866570	AQP4	t	c	309	-0.128	-+	0.8984	0.947092
	Hippocampal_Volume	Longitudinal	rs151244	18	26866755	AQP4	t	c	309	0.479	-+	0.6322	0.809452
	Hippocampal_Volume	Longitudinal	rs72878794	18	26866839	AQP4	t	c	309	0.906	++	0.3648	0.697749
	Hippocampal_Volume	Longitudinal	rs9961118	18	26866901	AQP4	t	c	309	-0.338	--	0.7351	0.872853
	Hippocampal_Volume	Longitudinal	rs162004	18	26867972	AQP4	c	g	309	0.669	++	0.5033	0.760648
	Hippocampal_Volume	Longitudinal	rs72878799	18	26868165	AQP4	a	g	309	1.435	++	0.1513	0.635805
	Hippocampal_Volume	Longitudinal	rs11662318	18	26869056	AQP4	t	c	309	0.903	++	0.3667	0.697749
	Hippocampal_Volume	Longitudinal	rs151246	18	26869139	AQP4	t	g	309	-0.024	-+	0.9806	0.9932
	Hippocampal_Volume	Longitudinal	rs491148	18	26869803	AQP4	a	g	309	-0.924	--	0.3557	0.696156
	Hippocampal_Volume	Longitudinal	rs162002	18	26871015	AQP4	a	g	309	-1.218	--	0.2234	0.649696
	Hippocampal_Volume	Longitudinal	rs162001	18	26871481	AQP4	a	c	309	1.125	++	0.2607	0.661913
	Hippocampal_Volume	Longitudinal	rs3865411	18	26871684	AQP4	a	g	309	-0.805	--	0.4209	0.716701
	Hippocampal_Volume	Longitudinal	rs162000	18	26872471	AQP4	a	c	309	-0.8	--	0.424	0.716701
	Hippocampal_Volume	Longitudinal	rs12969503	18	26873564	AQP4	t	g	309	-1.124	--	0.2609	0.661913
	Hippocampal_Volume	Longitudinal	rs8094228	18	26873767	AQP4	t	c	309	1.468	++	0.1422	0.635805
	Hippocampal_Volume	Longitudinal	rs480647	18	26874290	AQP4	t	c	309	-0.454	--	0.6497	0.823131
	Hippocampal_Volume	Longitudinal	rs10502478	18	26874616	AQP4	a	c	309	1.562	++	0.1183	0.635805
	Hippocampal_Volume	Longitudinal	rs7234562	18	34483685	DTNA	t	c	309	-0.325	-+	0.7451	0.872853
	Hippocampal_Volume	Longitudinal	rs79922046	18	34485536	DTNA	a	g	309	0.147	-+	0.8831	0.945193
	Hippocampal_Volume	Longitudinal	rs9955950	18	34485672	DTNA	t	c	309	0.534	++	0.5933	0.802448
	Hippocampal_Volume	Longitudinal	rs12957028	18	34485948	DTNA	a	g	309	-0.194	+-	0.846	0.927216
	Hippocampal_Volume	Longitudinal	rs72639491	18	34491438	DTNA	a	g	309	-0.669	-+	0.5033	0.760648
	Hippocampal_Volume	Longitudinal	rs62097347	18	34492032	DTNA	c	g	309	-1.397	--	0.1626	0.635805
	Hippocampal_Volume	Longitudinal	rs9961251	18	34492344	DTNA	t	c	309	-0.447	-+	0.6549	0.823131
	Hippocampal_Volume	Longitudinal	rs111846993	18	34494001	DTNA	t	c	309	1.293	++	0.1962	0.635805
	Hippocampal_Volume	Longitudinal	rs4799769	18	34494577	DTNA	c	g	309	1.948	++	0.05139	0.546314
	Hippocampal_Volume	Longitudinal	rs8092794	18	34496273	DTNA	a	g	309	-0.768	+-	0.4427	0.716701
	Hippocampal_Volume	Longitudinal	rs7243528	18	34497055	DTNA	t	c	309	0.368	-+	0.7129	0.872853
	Hippocampal_Volume	Longitudinal	rs79972565	18	34497194	DTNA	t	g	309	-0.212	-+	0.832	0.921325
	Hippocampal_Volume	Longitudinal	rs35839923	18	34497764	DTNA	a	g	309	0.579	++	0.5627	0.782561
	Hippocampal_Volume	Longitudinal	rs62097349	18	34499519	DTNA	a	g	309	0.363	++	0.7163	0.872853
	Hippocampal_Volume	Longitudinal	rs9965622	18	34502153	DTNA	t	c	309	0.354	+-	0.7236	0.872853
	Hippocampal_Volume	Longitudinal	rs62098462	18	34504364	DTNA	t	c	309	0.077	-+	0.9385	0.981485
	Hippocampal_Volume	Longitudinal	rs75127284	18	34506592	DTNA	a	c	309	-1.809	--	0.07045	0.627803
	Hippocampal_Volume	Longitudinal	rs2439861	18	34507940	DTNA	a	g	309	1.636	++	0.1019	0.635805
	Hippocampal_Volume	Longitudinal	rs35982920	18	34516411	DTNA	a	g	309	-1.191	--	0.2338	0.649696
	Hippocampal_Volume	Longitudinal	rs2509597	18	34528430	DTNA	a	t	309	0.047	-+	0.9622	0.9932
	Hippocampal_Volume	Longitudinal	rs71363449	18	34531997	DTNA	t	c	309	-1.166	--	0.2437	0.649696
	Hippocampal_Volume	Longitudinal	rs2439853	18	34533937	DTNA	a	g	309	-2.106	--	0.03524	0.50964
	Hippocampal_Volume	Longitudinal	rs2439000	18	34536414	DTNA	c	g	309	1.511	++	0.1307	0.635805
	Hippocampal_Volume	Longitudinal	rs11875892	18	34544032	DTNA	a	g	309	-2.049	--	0.04042	0.50964
	Hippocampal_Volume	Longitudinal	rs1967583	18	34544573	DTNA	t	c	309	1.248	++	0.2121	0.645727
	Hippocampal_Volume	Longitudinal	rs28856895	18	34555507	DTNA	a	g	309	-0.01	-+	0.992	0.9932
	Hippocampal_Volume	Longitudinal	rs77973497	18	34560529	DTNA	a	c	309	-0.592	+-	0.5535	0.782561
	Hippocampal_Volume	Longitudinal	rs2579796	18	34569243	DTNA	a	g	309	-1.617	--	0.1059	0.635805
	Hippocampal_Volume	Longitudinal	rs2579797	18	34571732	DTNA	t	g	309	-1.06	--	0.2891	0.694854
	Hippocampal_Volume	Longitudinal	rs2685557	18	34576782	DTNA	t	c	309	-1.591	--	0.1115	0.635805
	Hippocampal_Volume	Longitudinal	rs9958492	18	34577783	DTNA	t	c	309	-0.933	--	0.3507	0.696156
	Hippocampal_Volume	Longitudinal	rs2579802	18	34579787	DTNA	a	c	309	-1.357	--	0.1747	0.635805
	Hippocampal_Volume	Longitudinal	rs74920018	18	34607557	DTNA	a	t	309	-0.211	+-	0.833	0.921325
	Hippocampal_Volume	Longitudinal	rs1439127	18	34607759	DTNA	a	t	309	-0.042	+-	0.9666	0.9932
	Hippocampal_Volume	Longitudinal	rs12327368	18	34611361	DTNA	a	g	309	-0.972	--	0.3311	0.696156
	Hippocampal_Volume	Longitudinal	rs62097188	18	34611412	DTNA	a	g	309	0.486	-+	0.6273	0.809452
	Hippocampal_Volume	Longitudinal	rs9807153	18	34635520	DTNA	a	t	309	0.631	++	0.5279	0.769386
	Hippocampal_Volume	Longitudinal	rs2730126	18	34635939	DTNA	a	c	309	-1.75	--	0.08005	0.634516
	Hippocampal_Volume	Longitudinal	rs1659526	18	34644451	DTNA	a	g	309	-1.3	--	0.1936	0.635805
	Hippocampal_Volume	Longitudinal	rs17642885	18	34649976	DTNA	t	c	309	0.767	++	0.4432	0.716701
	Hippocampal_Volume	Longitudinal	rs1240974	18	34650949	DTNA	t	c	309	-1.383	--	0.1667	0.635805
	Hippocampal_Volume	Longitudinal	rs55869511	18	34651262	DTNA	a	c	309	0.525	++	0.5995	0.802448
	Hippocampal_Volume	Longitudinal	rs12955208	18	34656737	DTNA	a	g	309	1.944	++	0.05184	0.546314
	Hippocampal_Volume	Longitudinal	rs72953203	18	34660068	DTNA	a	g	309	-0.791	--	0.429	0.716701
	Hippocampal_Volume	Longitudinal	rs9946070	18	34665505	DTNA	a	g	309	-1.069	-+	0.2852	0.694854
	Hippocampal_Volume	Longitudinal	rs72953211	18	34673381	DTNA	a	c	309	0.882	+-	0.3776	0.703267
	Hippocampal_Volume	Longitudinal	rs55971592	18	34697328	DTNA	a	g	309	-1.356	--	0.1752	0.635805
	Hippocampal_Volume	Longitudinal	rs78837792	18	34703359	DTNA	t	c	309	0.575	++	0.5655	0.782561
	Hippocampal_Volume	Longitudinal	rs11663468	18	34707936	DTNA	t	c	309	-0.926	-+	0.3544	0.696156
	Hippocampal_Volume	Longitudinal	rs12963825	18	34709484	DTNA	a	g	309	-0.156	+-	0.8761	0.945084
	Hippocampal_Volume	Longitudinal	rs1480432	18	34727166	DTNA	t	g	309	1.485	++	0.1375	0.635805
	Hippocampal_Volume	Longitudinal	rs45556134	18	34729425	DTNA	a	g	309	2.044	++	0.04092	0.50964
	Hippocampal_Volume	Longitudinal	rs899828	18	34732688	DTNA	t	g	309	0.727	++	0.467	0.735391
	Hippocampal_Volume	Longitudinal	rs17556884	18	34736455	DTNA	t	c	309	0.575	++	0.565	0.782561
	Hippocampal_Volume	Longitudinal	rs1480428	18	34738732	DTNA	a	g	309	1.27	+-	0.2042	0.635805
	Hippocampal_Volume	Longitudinal	rs12957349	18	34739291	DTNA	t	c	309	2.616	++	0.008895	0.304654
	Hippocampal_Volume	Longitudinal	rs12608110	18	34752198	DTNA	a	g	309	0.709	++	0.4783	0.744626
	Hippocampal_Volume	Longitudinal	rs7228547	18	34760039	DTNA	a	g	309	0.941	+-	0.3467	0.696156
	Hippocampal_Volume	Longitudinal	rs8099437	18	34761448	DTNA	t	g	309	1.27	+-	0.2042	0.635805
	Hippocampal_Volume	Longitudinal	rs72955132	18	34762382	DTNA	a	g	309	0.765	++	0.444	0.716701
	Hippocampal_Volume	Longitudinal	rs1817452	18	34776629	DTNA	t	c	309	2.953	++	0.003145	0.188101
	Hippocampal_Volume	Longitudinal	rs56404226	18	34778060	DTNA	a	g	309	-1.28	--	0.2007	0.635805
	Hippocampal_Volume	Longitudinal	rs72955175	18	34779045	DTNA	a	t	309	1.333	+-	0.1825	0.635805
	Hippocampal_Volume	Longitudinal	rs12608251	18	34782906	DTNA	t	g	309	2.457	++	0.014	0.327202
	Hippocampal_Volume	Longitudinal	rs76880720	18	34791141	DTNA	a	c	309	-3.001	--	0.002695	0.188101
	Hippocampal_Volume	Longitudinal	rs9989533	18	34793909	DTNA	t	c	309	1.401	++	0.1613	0.635805
	Hippocampal_Volume	Longitudinal	rs79500711	18	34794379	DTNA	a	g	309	1.682	++	0.09263	0.634516
	Hippocampal_Volume	Longitudinal	rs138856611	18	34801684	DTNA	t	g	309	1.791	++	0.07332	0.627803
	Hippocampal_Volume	Longitudinal	rs62097226	18	34804223	DTNA	a	t	309	0.17	+-	0.8646	0.940081
	Hippocampal_Volume	Longitudinal	rs4458079	18	34806161	DTNA	t	c	309	-0.869	--	0.385	0.703267
	Hippocampal_Volume	Longitudinal	rs8086358	18	34813672	DTNA	t	g	309	-1.159	-+	0.2466	0.649696
	Hippocampal_Volume	Longitudinal	rs72963047	18	34818804	DTNA	a	c	309	0.756	+-	0.4499	0.716701
	Hippocampal_Volume	Longitudinal	rs17557660	18	34831178	DTNA	a	t	309	1.705	++	0.08822	0.634516
	Hippocampal_Volume	Longitudinal	rs1790533	18	34831631	DTNA	a	g	309	2.449	++	0.01433	0.327202
	Hippocampal_Volume	Longitudinal	rs4799782	18	34841123	DTNA	a	g	309	-1.887	--	0.05912	0.578531
	Hippocampal_Volume	Longitudinal	rs1786604	18	34846264	DTNA	a	g	309	0.985	+-	0.3247	0.696156
	Hippocampal_Volume	Longitudinal	rs7233779	18	34863262	DTNA	a	g	309	0.969	++	0.3326	0.696156
	Hippocampal_Volume	Longitudinal	rs644982	18	34869793	DTNA	a	g	309	-0.647	-+	0.5176	0.762486
	Hippocampal_Volume	Longitudinal	rs11659517	18	34870978	DTNA	a	t	309	2.869	++	0.004119	0.188101
	Hippocampal_Volume	Longitudinal	rs524969	18	34872102	DTNA	a	t	309	-2.381	--	0.01728	0.338194
	Hippocampal_Volume	Longitudinal	rs637914	18	34876135	DTNA	a	t	309	-1.315	--	0.1884	0.635805
	Hippocampal_Volume	Longitudinal	rs9304141	18	34879143	DTNA	t	c	309	-1.589	--	0.112	0.635805
	Hippocampal_Volume	Longitudinal	rs2288085	18	34879740	DTNA	a	g	309	-0.318	-+	0.7508	0.872853
	Hippocampal_Volume	Longitudinal	rs17558116	18	34882719	DTNA	t	c	309	1.473	+-	0.1408	0.635805
	Hippocampal_Volume	Longitudinal	rs10502637	18	34890006	DTNA	t	c	309	0.496	+-	0.6196	0.809452
	Hippocampal_Volume	Longitudinal	rs149163416	18	34898841	DTNA	a	g	309	1.16	++	0.246	0.649696
	Hippocampal_Volume	Longitudinal	20:33413780	20	33413780	SNTA1	a	t	309	0.85	-+	0.3955	0.712941
	Hippocampal_Volume	Longitudinal	rs291683	20	33431611	SNTA1	t	c	309	0.876	+-	0.3809	0.703267
	Hippocampal_Volume	Longitudinal	20:33433270	20	33433270	SNTA1	t	c	309	-1.459	-+	0.1444	0.635805
	Hippocampal_Volume	Longitudinal	rs6141396	20	33436147	SNTA1	a	c	169	-2.264	-?	0.02359	0.403979
	Hippocampal_Volume	Longitudinal	rs293721	20	33441633	SNTA1	t	c	309	0.127	+-	0.8987	0.947092
	PACC	Cross-Sectional	rs111599092	3	49465346	DAG1	a	g	964	-0.163	+-	0.8703	0.9955
	PACC	Cross-Sectional	rs73073015	3	49465733	DAG1	a	g	964	0.151	-+	0.8799	0.9955
	PACC	Cross-Sectional	rs7611164	3	49471395	DAG1	t	g	964	0.635	-+	0.5252	0.9955
	PACC	Cross-Sectional	rs1568661	3	49483525	DAG1	a	g	964	-1.598	--	0.11	0.81926
	PACC	Cross-Sectional	rs7374731	3	49495661	DAG1	c	g	964	0.299	-+	0.7651	0.9955
	PACC	Cross-Sectional	rs73074811	3	49516098	DAG1	a	t	964	-1.254	+-	0.21	0.845434
	PACC	Cross-Sectional	rs3870338	3	49519618	DAG1	a	g	964	-1.598	--	0.11	0.81926
	PACC	Cross-Sectional	rs55935606	3	49528072	DAG1	a	g	964	-1.217	+-	0.2238	0.845434
	PACC	Cross-Sectional	rs75153130	3	49530436	DAG1	a	c	964	-0.635	+-	0.5252	0.9955
	PACC	Cross-Sectional	rs13079082	3	49537375	DAG1	c	g	964	1.098	++	0.2721	0.856402
	PACC	Cross-Sectional	rs4052546	3	49538116	DAG1	c	g	964	-0.299	+-	0.7651	0.9955
	PACC	Cross-Sectional	rs73074830	3	49539584	DAG1	a	c	964	0.825	-+	0.4092	0.984718
	PACC	Cross-Sectional	rs114093899	3	49539955	DAG1	c	g	964	0.961	++	0.3364	0.967277
	PACC	Cross-Sectional	rs9789109	18	26842291	AQP4	a	g	964	0.03	-+	0.9762	0.9955
	PACC	Cross-Sectional	rs10164026	18	26842362	AQP4	a	c	964	3.38	++	0.000725	0.0496625
	PACC	Cross-Sectional	rs4800270	18	26844933	AQP4	t	g	964	0.105	-+	0.9161	0.9955
	PACC	Cross-Sectional	rs79668602	18	26845488	AQP4	a	g	964	0.143	-+	0.8865	0.9955
	PACC	Cross-Sectional	rs12458416	18	26847267	AQP4	c	g	964	2.816	++	0.004856	0.221757
	PACC	Cross-Sectional	rs12953446	18	26848521	AQP4	a	g	964	-0.585	-+	0.5584	0.9955
	PACC	Cross-Sectional	rs67461489	18	26848876	AQP4	t	c	964	-0.927	+-	0.3541	0.971604
	PACC	Cross-Sectional	rs11661081	18	26850068	AQP4	a	c	964	-0.021	+-	0.9829	0.9955
	PACC	Cross-Sectional	rs3763043	18	26855854	AQP4	t	c	964	-1.383	--	0.1668	0.845434
	PACC	Cross-Sectional	rs68006382	18	26856555	AQP4	a	g	964	0.182	-+	0.8559	0.9955
	PACC	Cross-Sectional	rs335930	18	26856961	AQP4	a	c	964	-0.603	+-	0.5465	0.9955
	PACC	Cross-Sectional	rs71353405	18	26857429	AQP4	t	c	964	0.146	+-	0.8841	0.9955
	PACC	Cross-Sectional	rs162009	18	26864250	AQP4	a	g	964	1.367	-+	0.1716	0.845434
	PACC	Cross-Sectional	rs4800773	18	26865017	AQP4	a	g	964	-1.23	-+	0.2187	0.845434
	PACC	Cross-Sectional	rs3875089	18	26865469	AQP4	t	c	964	-0.32	+-	0.7488	0.9955
	PACC	Cross-Sectional	rs72878787	18	26866517	AQP4	a	g	964	-0.315	-+	0.7528	0.9955
	PACC	Cross-Sectional	rs162006	18	26866570	AQP4	t	c	964	2.229	++	0.02583	0.321701
	PACC	Cross-Sectional	rs151244	18	26866755	AQP4	t	c	964	-2.575	--	0.01003	0.274822
	PACC	Cross-Sectional	rs72878794	18	26866839	AQP4	t	c	964	-1.348	--	0.1776	0.845434
	PACC	Cross-Sectional	rs9961118	18	26866901	AQP4	t	c	964	-0.178	+-	0.8589	0.9955
	PACC	Cross-Sectional	rs162004	18	26867972	AQP4	c	g	964	0.612	++	0.5408	0.9955
	PACC	Cross-Sectional	rs72878799	18	26868165	AQP4	a	g	964	1.771	++	0.07651	0.698791
	PACC	Cross-Sectional	rs11662318	18	26869056	AQP4	t	c	964	1.273	-+	0.2029	0.845434
	PACC	Cross-Sectional	rs151246	18	26869139	AQP4	t	g	964	-0.121	+-	0.9038	0.9955
	PACC	Cross-Sectional	rs491148	18	26869803	AQP4	a	g	964	-0.824	+-	0.4097	0.984718
	PACC	Cross-Sectional	rs162002	18	26871015	AQP4	a	g	964	-2.254	--	0.02417	0.321701
	PACC	Cross-Sectional	rs162001	18	26871481	AQP4	a	c	964	1.125	++	0.2608	0.856402
	PACC	Cross-Sectional	rs3865411	18	26871684	AQP4	a	g	964	-1.409	--	0.1588	0.845434
	PACC	Cross-Sectional	rs162000	18	26872471	AQP4	a	c	964	-0.774	--	0.4392	0.9955
	PACC	Cross-Sectional	rs12969503	18	26873564	AQP4	t	g	964	-2.387	--	0.01698	0.285264
	PACC	Cross-Sectional	rs8094228	18	26873767	AQP4	t	c	964	2.712	++	0.006688	0.229064
	PACC	Cross-Sectional	rs480647	18	26874290	AQP4	t	c	964	-1.204	--	0.2287	0.845434
	PACC	Cross-Sectional	rs10502478	18	26874616	AQP4	a	c	964	3.913	++	9.132e-05	0.0125108
	PACC	Cross-Sectional	rs7234562	18	34483685	DTNA	t	c	964	-0.08	-+	0.9364	0.9955
	PACC	Cross-Sectional	rs79922046	18	34485536	DTNA	a	g	964	0.042	-+	0.9668	0.9955
	PACC	Cross-Sectional	rs9955950	18	34485672	DTNA	t	c	964	0.164	++	0.8695	0.9955
	PACC	Cross-Sectional	rs12957028	18	34485948	DTNA	a	g	964	0.147	+-	0.8834	0.9955
	PACC	Cross-Sectional	rs72639491	18	34491438	DTNA	a	g	964	-0.315	+-	0.7531	0.9955
	PACC	Cross-Sectional	rs62097347	18	34492032	DTNA	c	g	964	-0.571	--	0.5678	0.9955
	PACC	Cross-Sectional	rs9961251	18	34492344	DTNA	t	c	964	-1.95	--	0.05123	0.501322
	PACC	Cross-Sectional	rs111846993	18	34494001	DTNA	t	c	964	0.331	++	0.7406	0.9955
	PACC	Cross-Sectional	rs4799769	18	34494577	DTNA	c	g	964	0.397	-+	0.6912	0.9955
	PACC	Cross-Sectional	rs8092794	18	34496273	DTNA	a	g	964	0.427	-+	0.6691	0.9955
	PACC	Cross-Sectional	rs7243528	18	34497055	DTNA	t	c	964	-0.614	--	0.5394	0.9955
	PACC	Cross-Sectional	rs79972565	18	34497194	DTNA	t	g	964	0.14	+-	0.8886	0.9955
	PACC	Cross-Sectional	rs35839923	18	34497764	DTNA	a	g	964	-0.016	+-	0.9869	0.9955
	PACC	Cross-Sectional	rs62097349	18	34499519	DTNA	a	g	964	-0.012	+-	0.9908	0.9955
	PACC	Cross-Sectional	rs9965622	18	34502153	DTNA	t	c	964	-1.077	--	0.2813	0.856402
	PACC	Cross-Sectional	rs62098462	18	34504364	DTNA	t	c	964	-0.117	+-	0.907	0.9955
	PACC	Cross-Sectional	rs75127284	18	34506592	DTNA	a	c	964	-0.389	-+	0.697	0.9955
	PACC	Cross-Sectional	rs2439861	18	34507940	DTNA	a	g	964	-0.219	--	0.8266	0.9955
	PACC	Cross-Sectional	rs35982920	18	34516411	DTNA	a	g	964	0.489	+-	0.6245	0.9955
	PACC	Cross-Sectional	rs2509597	18	34528430	DTNA	a	t	964	0.027	-+	0.9786	0.9955
	PACC	Cross-Sectional	rs71363449	18	34531997	DTNA	t	c	964	0.628	++	0.5301	0.9955
	PACC	Cross-Sectional	rs2439853	18	34533937	DTNA	a	g	964	-0.738	+-	0.4608	0.9955
	PACC	Cross-Sectional	rs2439000	18	34536414	DTNA	c	g	964	0.841	-+	0.4002	0.984718
	PACC	Cross-Sectional	rs11875892	18	34544032	DTNA	a	g	964	1.14	++	0.2542	0.856402
	PACC	Cross-Sectional	rs1967583	18	34544573	DTNA	t	c	964	2.138	++	0.03248	0.370813
	PACC	Cross-Sectional	rs28856895	18	34555507	DTNA	a	g	964	1.189	++	0.2345	0.845434
	PACC	Cross-Sectional	rs77973497	18	34560529	DTNA	a	c	964	-0.509	+-	0.6105	0.9955
	PACC	Cross-Sectional	rs2579796	18	34569243	DTNA	a	g	964	-0.457	+-	0.648	0.9955
	PACC	Cross-Sectional	rs2579797	18	34571732	DTNA	t	g	964	-0.829	+-	0.4071	0.984718
	PACC	Cross-Sectional	rs2685557	18	34576782	DTNA	t	c	964	-0.336	+-	0.7365	0.9955
	PACC	Cross-Sectional	rs9958492	18	34577783	DTNA	t	c	964	0.857	++	0.3912	0.984718
	PACC	Cross-Sectional	rs2579802	18	34579787	DTNA	a	c	964	-0.752	+-	0.4522	0.9955
	PACC	Cross-Sectional	rs74920018	18	34607557	DTNA	a	t	964	-0.106	+-	0.9158	0.9955
	PACC	Cross-Sectional	rs1439127	18	34607759	DTNA	a	t	964	1.235	++	0.2168	0.845434
	PACC	Cross-Sectional	rs12327368	18	34611361	DTNA	a	g	964	1.034	++	0.3012	0.897052
	PACC	Cross-Sectional	rs62097188	18	34611412	DTNA	a	g	964	1.565	++	0.1175	0.81926
	PACC	Cross-Sectional	rs9807153	18	34635520	DTNA	a	t	964	-0.538	+-	0.5908	0.9955
	PACC	Cross-Sectional	rs2730126	18	34635939	DTNA	a	c	964	-0.443	+-	0.6579	0.9955
	PACC	Cross-Sectional	rs1659526	18	34644451	DTNA	a	g	964	-0.757	+-	0.4491	0.9955
	PACC	Cross-Sectional	rs17642885	18	34649976	DTNA	t	c	964	-1.206	--	0.2279	0.845434
	PACC	Cross-Sectional	rs1240974	18	34650949	DTNA	t	c	964	-1.44	+-	0.1499	0.845434
	PACC	Cross-Sectional	rs55869511	18	34651262	DTNA	a	c	964	-0.229	--	0.8188	0.9955
	PACC	Cross-Sectional	rs12955208	18	34656737	DTNA	a	g	964	-0.042	+-	0.9667	0.9955
	PACC	Cross-Sectional	rs72953203	18	34660068	DTNA	a	g	964	-0.538	--	0.5907	0.9955
	PACC	Cross-Sectional	rs9946070	18	34665505	DTNA	a	g	964	-0.177	+-	0.8591	0.9955
	PACC	Cross-Sectional	rs72953211	18	34673381	DTNA	a	c	964	0.491	-+	0.6237	0.9955
	PACC	Cross-Sectional	rs55971592	18	34697328	DTNA	a	g	964	-1.292	--	0.1964	0.845434
	PACC	Cross-Sectional	rs78837792	18	34703359	DTNA	t	c	964	1.304	++	0.1921	0.845434
	PACC	Cross-Sectional	rs11663468	18	34707936	DTNA	t	c	964	-0.463	+-	0.6432	0.9955
	PACC	Cross-Sectional	rs12963825	18	34709484	DTNA	a	g	964	-0.327	--	0.7438	0.9955
	PACC	Cross-Sectional	rs1480432	18	34727166	DTNA	t	g	964	-0.6	--	0.5483	0.9955
	PACC	Cross-Sectional	rs45556134	18	34729425	DTNA	a	g	964	0.926	++	0.3546	0.971604
	PACC	Cross-Sectional	rs899828	18	34732688	DTNA	t	g	964	-1.656	--	0.09779	0.81926
	PACC	Cross-Sectional	rs17556884	18	34736455	DTNA	t	c	964	-0.485	--	0.6276	0.9955
	PACC	Cross-Sectional	rs1480428	18	34738732	DTNA	a	g	964	0.246	-+	0.8053	0.9955
	PACC	Cross-Sectional	rs12957349	18	34739291	DTNA	t	c	964	-0.194	+-	0.846	0.9955
	PACC	Cross-Sectional	rs12608110	18	34752198	DTNA	a	g	964	0.184	-+	0.854	0.9955
	PACC	Cross-Sectional	rs7228547	18	34760039	DTNA	a	g	964	0.301	-+	0.7635	0.9955
	PACC	Cross-Sectional	rs8099437	18	34761448	DTNA	t	g	964	0.221	-+	0.825	0.9955
	PACC	Cross-Sectional	rs72955132	18	34762382	DTNA	a	g	964	-0.226	+-	0.8214	0.9955
	PACC	Cross-Sectional	rs1817452	18	34776629	DTNA	t	c	964	-0.028	+-	0.9775	0.9955
	PACC	Cross-Sectional	rs56404226	18	34778060	DTNA	a	g	964	0.105	+-	0.9167	0.9955
	PACC	Cross-Sectional	rs72955175	18	34779045	DTNA	a	t	964	0.073	-+	0.9415	0.9955
	PACC	Cross-Sectional	rs12608251	18	34782906	DTNA	t	g	964	-0.094	+-	0.9254	0.9955
	PACC	Cross-Sectional	rs76880720	18	34791141	DTNA	a	c	964	-0.143	-+	0.8862	0.9955
	PACC	Cross-Sectional	rs9989533	18	34793909	DTNA	t	c	964	0.346	-+	0.7291	0.9955
	PACC	Cross-Sectional	rs79500711	18	34794379	DTNA	a	g	964	-0.893	--	0.3719	0.984718
	PACC	Cross-Sectional	rs138856611	18	34801684	DTNA	t	g	964	2.447	++	0.01442	0.28222
	PACC	Cross-Sectional	rs62097226	18	34804223	DTNA	a	t	964	-0.441	+-	0.6594	0.9955
	PACC	Cross-Sectional	rs4458079	18	34806161	DTNA	t	c	964	0.956	-+	0.3389	0.967277
	PACC	Cross-Sectional	rs8086358	18	34813672	DTNA	t	g	964	1.127	++	0.2599	0.856402
	PACC	Cross-Sectional	rs72963047	18	34818804	DTNA	a	c	964	1.557	++	0.1196	0.81926
	PACC	Cross-Sectional	rs17557660	18	34831178	DTNA	a	t	964	0.129	-+	0.8974	0.9955
	PACC	Cross-Sectional	rs1790533	18	34831631	DTNA	a	g	964	0.006	+-	0.9955	0.9955
	PACC	Cross-Sectional	rs4799782	18	34841123	DTNA	a	g	964	-2.351	--	0.01874	0.285264
	PACC	Cross-Sectional	rs1786604	18	34846264	DTNA	a	g	964	-0.089	-+	0.9293	0.9955
	PACC	Cross-Sectional	rs7233779	18	34863262	DTNA	a	g	964	2.048	++	0.04056	0.42744
	PACC	Cross-Sectional	rs644982	18	34869793	DTNA	a	g	964	1.514	++	0.1301	0.845434
	PACC	Cross-Sectional	rs11659517	18	34870978	DTNA	a	t	964	0.016	+-	0.9873	0.9955
	PACC	Cross-Sectional	rs524969	18	34872102	DTNA	a	t	964	-1.091	--	0.2753	0.856402
	PACC	Cross-Sectional	rs637914	18	34876135	DTNA	a	t	964	-0.116	-+	0.9076	0.9955
	PACC	Cross-Sectional	rs9304141	18	34879143	DTNA	t	c	964	1.272	++	0.2032	0.845434
	PACC	Cross-Sectional	rs2288085	18	34879740	DTNA	a	g	964	2.451	++	0.01426	0.28222
	PACC	Cross-Sectional	rs17558116	18	34882719	DTNA	t	c	964	0.15	+-	0.8809	0.9955
	PACC	Cross-Sectional	rs10502637	18	34890006	DTNA	t	c	964	0.46	-+	0.6458	0.9955
	PACC	Cross-Sectional	rs149163416	18	34898841	DTNA	a	g	964	-0.875	--	0.3818	0.984718
	PACC	Cross-Sectional	20:33413780	20	33413780	SNTA1	a	t	964	0.745	+-	0.4562	0.9955
	PACC	Cross-Sectional	rs291683	20	33431611	SNTA1	t	c	964	-1.11	--	0.2672	0.856402
	PACC	Cross-Sectional	20:33433270	20	33433270	SNTA1	t	c	964	0.14	-+	0.8887	0.9955
	PACC	Cross-Sectional	rs6141396	20	33436147	SNTA1	a	c	402	-1.301	-?	0.1931	0.845434
	PACC	Cross-Sectional	rs293721	20	33441633	SNTA1	t	c	964	-0.164	--	0.8696	0.9955
	PACC	Longitudinal	rs111599092	3	49465346	DAG1	a	g	690	1.481	++	0.1387	0.730459
	PACC	Longitudinal	rs73073015	3	49465733	DAG1	a	g	690	0.841	++	0.4004	0.771767
	PACC	Longitudinal	rs7611164	3	49471395	DAG1	t	g	690	1.239	++	0.2153	0.730459
	PACC	Longitudinal	rs1568661	3	49483525	DAG1	a	g	690	-0.575	-+	0.565	0.813009
	PACC	Longitudinal	rs7374731	3	49495661	DAG1	c	g	690	-1.003	--	0.3159	0.76859
	PACC	Longitudinal	rs73074811	3	49516098	DAG1	a	t	690	1.34	++	0.1804	0.730459
	PACC	Longitudinal	rs3870338	3	49519618	DAG1	a	g	690	-0.575	-+	0.565	0.813009
	PACC	Longitudinal	rs55935606	3	49528072	DAG1	a	g	690	1.812	++	0.06997	0.730459
	PACC	Longitudinal	rs75153130	3	49530436	DAG1	a	c	690	-1.239	--	0.2153	0.730459
	PACC	Longitudinal	rs13079082	3	49537375	DAG1	c	g	690	-1.539	--	0.1237	0.730459
	PACC	Longitudinal	rs4052546	3	49538116	DAG1	c	g	690	1.003	++	0.3159	0.76859
	PACC	Longitudinal	rs73074830	3	49539584	DAG1	a	c	690	-1.419	--	0.1559	0.730459
	PACC	Longitudinal	rs114093899	3	49539955	DAG1	c	g	690	-0.015	+-	0.988	0.9942
	PACC	Longitudinal	rs9789109	18	26842291	AQP4	a	g	690	1.424	-+	0.1544	0.730459
	PACC	Longitudinal	rs10164026	18	26842362	AQP4	a	c	690	1.079	++	0.2806	0.76859
	PACC	Longitudinal	rs4800270	18	26844933	AQP4	t	g	690	1.112	++	0.2662	0.759779
	PACC	Longitudinal	rs79668602	18	26845488	AQP4	a	g	690	0.247	-+	0.8052	0.926995
	PACC	Longitudinal	rs12458416	18	26847267	AQP4	c	g	690	0.545	++	0.5854	0.826802
	PACC	Longitudinal	rs12953446	18	26848521	AQP4	a	g	690	-0.481	+-	0.6308	0.8494
	PACC	Longitudinal	rs67461489	18	26848876	AQP4	t	c	690	0.933	-+	0.3511	0.76859
	PACC	Longitudinal	rs11661081	18	26850068	AQP4	a	c	690	1.262	++	0.2068	0.730459
	PACC	Longitudinal	rs3763043	18	26855854	AQP4	t	c	690	-1	-+	0.3171	0.76859
	PACC	Longitudinal	rs68006382	18	26856555	AQP4	a	g	690	0.702	+-	0.4825	0.782512
	PACC	Longitudinal	rs335930	18	26856961	AQP4	a	c	690	-0.832	+-	0.4056	0.771767
	PACC	Longitudinal	rs71353405	18	26857429	AQP4	t	c	690	0.355	+-	0.7223	0.891487
	PACC	Longitudinal	rs162009	18	26864250	AQP4	a	g	690	-0.632	--	0.5273	0.799267
	PACC	Longitudinal	rs4800773	18	26865017	AQP4	a	g	690	-1.053	+-	0.2923	0.76859
	PACC	Longitudinal	rs3875089	18	26865469	AQP4	t	c	690	0.481	-+	0.6303	0.8494
	PACC	Longitudinal	rs72878787	18	26866517	AQP4	a	g	690	0.207	-+	0.836	0.954433
	PACC	Longitudinal	rs162006	18	26866570	AQP4	t	c	690	0.806	++	0.4205	0.776333
	PACC	Longitudinal	rs151244	18	26866755	AQP4	t	c	690	1.038	-+	0.2993	0.76859
	PACC	Longitudinal	rs72878794	18	26866839	AQP4	t	c	690	-1.908	--	0.05639	0.730459
	PACC	Longitudinal	rs9961118	18	26866901	AQP4	t	c	690	-1.144	--	0.2526	0.736302
	PACC	Longitudinal	rs162004	18	26867972	AQP4	c	g	690	0.066	+-	0.9476	0.987749
	PACC	Longitudinal	rs72878799	18	26868165	AQP4	a	g	690	1.175	++	0.2402	0.731276
	PACC	Longitudinal	rs11662318	18	26869056	AQP4	t	c	690	-0.651	+-	0.5152	0.793061
	PACC	Longitudinal	rs151246	18	26869139	AQP4	t	g	690	0.384	+-	0.7008	0.880822
	PACC	Longitudinal	rs491148	18	26869803	AQP4	a	g	690	0.104	-+	0.9168	0.983533
	PACC	Longitudinal	rs162002	18	26871015	AQP4	a	g	690	-0.453	-+	0.6503	0.852502
	PACC	Longitudinal	rs162001	18	26871481	AQP4	a	c	690	1.513	++	0.1302	0.730459
	PACC	Longitudinal	rs3865411	18	26871684	AQP4	a	g	690	-0.29	-+	0.7721	0.911577
	PACC	Longitudinal	rs162000	18	26872471	AQP4	a	c	690	-0.892	-+	0.3726	0.76859
	PACC	Longitudinal	rs12969503	18	26873564	AQP4	t	g	690	-0.89	-+	0.3734	0.76859
	PACC	Longitudinal	rs8094228	18	26873767	AQP4	t	c	690	0.025	+-	0.9802	0.9942
	PACC	Longitudinal	rs480647	18	26874290	AQP4	t	c	690	0.507	++	0.6124	0.847463
	PACC	Longitudinal	rs10502478	18	26874616	AQP4	a	c	690	0.448	+-	0.6544	0.852502
	PACC	Longitudinal	rs7234562	18	34483685	DTNA	t	c	690	1.337	-+	0.1813	0.730459
	PACC	Longitudinal	rs79922046	18	34485536	DTNA	a	g	690	0.751	-+	0.4525	0.782512
	PACC	Longitudinal	rs9955950	18	34485672	DTNA	t	c	690	-0.798	+-	0.425	0.776333
	PACC	Longitudinal	rs12957028	18	34485948	DTNA	a	g	690	-0.112	+-	0.9106	0.983533
	PACC	Longitudinal	rs72639491	18	34491438	DTNA	a	g	690	0.867	++	0.3859	0.76859
	PACC	Longitudinal	rs62097347	18	34492032	DTNA	c	g	690	-0.777	--	0.437	0.782512
	PACC	Longitudinal	rs9961251	18	34492344	DTNA	t	c	690	1.418	-+	0.1562	0.730459
	PACC	Longitudinal	rs111846993	18	34494001	DTNA	t	c	690	1.939	++	0.0525	0.730459
	PACC	Longitudinal	rs4799769	18	34494577	DTNA	c	g	690	0.715	+-	0.4749	0.782512
	PACC	Longitudinal	rs8092794	18	34496273	DTNA	a	g	690	-2.221	--	0.02636	0.730459
	PACC	Longitudinal	rs7243528	18	34497055	DTNA	t	c	690	1.206	++	0.2279	0.730459
	PACC	Longitudinal	rs79972565	18	34497194	DTNA	t	g	690	0.568	+-	0.5697	0.813009
	PACC	Longitudinal	rs35839923	18	34497764	DTNA	a	g	690	-0.941	--	0.3469	0.76859
	PACC	Longitudinal	rs62097349	18	34499519	DTNA	a	g	690	0.461	+-	0.6451	0.852502
	PACC	Longitudinal	rs9965622	18	34502153	DTNA	t	c	690	-1.373	--	0.1698	0.730459
	PACC	Longitudinal	rs62098462	18	34504364	DTNA	t	c	690	1.773	++	0.07628	0.730459
	PACC	Longitudinal	rs75127284	18	34506592	DTNA	a	c	690	-1.558	--	0.1193	0.730459
	PACC	Longitudinal	rs2439861	18	34507940	DTNA	a	g	690	1.16	++	0.2461	0.73295
	PACC	Longitudinal	rs35982920	18	34516411	DTNA	a	g	690	1.316	++	0.1883	0.730459
	PACC	Longitudinal	rs2509597	18	34528430	DTNA	a	t	690	0.109	-+	0.9133	0.983533
	PACC	Longitudinal	rs71363449	18	34531997	DTNA	t	c	690	0.371	+-	0.7104	0.884771
	PACC	Longitudinal	rs2439853	18	34533937	DTNA	a	g	690	-0.954	+-	0.3403	0.76859
	PACC	Longitudinal	rs2439000	18	34536414	DTNA	c	g	690	1.203	++	0.2288	0.730459
	PACC	Longitudinal	rs11875892	18	34544032	DTNA	a	g	690	0.066	+-	0.9476	0.987749
	PACC	Longitudinal	rs1967583	18	34544573	DTNA	t	c	690	-0.281	+-	0.7785	0.911577
	PACC	Longitudinal	rs28856895	18	34555507	DTNA	a	g	690	0.697	+-	0.4855	0.782512
	PACC	Longitudinal	rs77973497	18	34560529	DTNA	a	c	690	1.194	+-	0.2323	0.730459
	PACC	Longitudinal	rs2579796	18	34569243	DTNA	a	g	690	-0.92	+-	0.3575	0.76859
	PACC	Longitudinal	rs2579797	18	34571732	DTNA	t	g	690	-1.331	--	0.1833	0.730459
	PACC	Longitudinal	rs2685557	18	34576782	DTNA	t	c	690	-0.976	+-	0.3293	0.76859
	PACC	Longitudinal	rs9958492	18	34577783	DTNA	t	c	690	0.269	+-	0.7881	0.914997
	PACC	Longitudinal	rs2579802	18	34579787	DTNA	a	c	690	-1.053	--	0.2925	0.76859
	PACC	Longitudinal	rs74920018	18	34607557	DTNA	a	t	690	1.757	+-	0.07888	0.730459
	PACC	Longitudinal	rs1439127	18	34607759	DTNA	a	t	690	0.037	+-	0.9701	0.9942
	PACC	Longitudinal	rs12327368	18	34611361	DTNA	a	g	690	0.44	+-	0.6596	0.852502
	PACC	Longitudinal	rs62097188	18	34611412	DTNA	a	g	690	-0.309	--	0.7574	0.910209
	PACC	Longitudinal	rs9807153	18	34635520	DTNA	a	t	690	-0.1	-+	0.9201	0.983533
	PACC	Longitudinal	rs2730126	18	34635939	DTNA	a	c	690	-0.901	+-	0.3675	0.76859
	PACC	Longitudinal	rs1659526	18	34644451	DTNA	a	g	690	-1.276	--	0.2021	0.730459
	PACC	Longitudinal	rs17642885	18	34649976	DTNA	t	c	690	-0.739	-+	0.46	0.782512
	PACC	Longitudinal	rs1240974	18	34650949	DTNA	t	c	690	-0.756	+-	0.4497	0.782512
	PACC	Longitudinal	rs55869511	18	34651262	DTNA	a	c	690	0.598	-+	0.5497	0.812277
	PACC	Longitudinal	rs12955208	18	34656737	DTNA	a	g	690	1.516	+-	0.1295	0.730459
	PACC	Longitudinal	rs72953203	18	34660068	DTNA	a	g	690	1.345	-+	0.1785	0.730459
	PACC	Longitudinal	rs9946070	18	34665505	DTNA	a	g	690	-0.686	+-	0.4925	0.784564
	PACC	Longitudinal	rs72953211	18	34673381	DTNA	a	c	690	0.413	-+	0.6799	0.862466
	PACC	Longitudinal	rs55971592	18	34697328	DTNA	a	g	690	1.189	++	0.2346	0.730459
	PACC	Longitudinal	rs78837792	18	34703359	DTNA	t	c	690	-0.818	+-	0.4134	0.775833
	PACC	Longitudinal	rs11663468	18	34707936	DTNA	t	c	690	-0.195	+-	0.8456	0.957415
	PACC	Longitudinal	rs12963825	18	34709484	DTNA	a	g	690	-1.506	--	0.132	0.730459
	PACC	Longitudinal	rs1480432	18	34727166	DTNA	t	g	690	0.876	+-	0.3808	0.76859
	PACC	Longitudinal	rs45556134	18	34729425	DTNA	a	g	690	0.114	-+	0.9095	0.983533
	PACC	Longitudinal	rs899828	18	34732688	DTNA	t	g	690	-0.837	--	0.4024	0.771767
	PACC	Longitudinal	rs17556884	18	34736455	DTNA	t	c	690	0.334	-+	0.7385	0.899835
	PACC	Longitudinal	rs1480428	18	34738732	DTNA	a	g	690	0.299	-+	0.7646	0.910871
	PACC	Longitudinal	rs12957349	18	34739291	DTNA	t	c	690	1.637	+-	0.1017	0.730459
	PACC	Longitudinal	rs12608110	18	34752198	DTNA	a	g	690	-0.53	--	0.596	0.833184
	PACC	Longitudinal	rs7228547	18	34760039	DTNA	a	g	690	-0.061	-+	0.9517	0.987749
	PACC	Longitudinal	rs8099437	18	34761448	DTNA	t	g	690	0.007	-+	0.9942	0.9942
	PACC	Longitudinal	rs72955132	18	34762382	DTNA	a	g	690	0.428	-+	0.6688	0.856314
	PACC	Longitudinal	rs1817452	18	34776629	DTNA	t	c	690	1.835	++	0.06648	0.730459
	PACC	Longitudinal	rs56404226	18	34778060	DTNA	a	g	690	-0.478	--	0.6324	0.8494
	PACC	Longitudinal	rs72955175	18	34779045	DTNA	a	t	690	-0.734	-+	0.463	0.782512
	PACC	Longitudinal	rs12608251	18	34782906	DTNA	t	g	690	2.048	+-	0.04052	0.730459
	PACC	Longitudinal	rs76880720	18	34791141	DTNA	a	c	690	-1.652	-+	0.09861	0.730459
	PACC	Longitudinal	rs9989533	18	34793909	DTNA	t	c	690	-1.399	--	0.1618	0.730459
	PACC	Longitudinal	rs79500711	18	34794379	DTNA	a	g	690	0.093	-+	0.9261	0.983533
	PACC	Longitudinal	rs138856611	18	34801684	DTNA	t	g	690	-0.627	--	0.5309	0.799267
	PACC	Longitudinal	rs62097226	18	34804223	DTNA	a	t	690	-1.299	--	0.1939	0.730459
	PACC	Longitudinal	rs4458079	18	34806161	DTNA	t	c	690	-0.897	+-	0.3698	0.76859
	PACC	Longitudinal	rs8086358	18	34813672	DTNA	t	g	690	0.668	+-	0.5041	0.784792
	PACC	Longitudinal	rs72963047	18	34818804	DTNA	a	c	690	-0.764	+-	0.4446	0.782512
	PACC	Longitudinal	rs17557660	18	34831178	DTNA	a	t	690	0.03	+-	0.9759	0.9942
	PACC	Longitudinal	rs1790533	18	34831631	DTNA	a	g	690	2.427	+-	0.01523	0.730459
	PACC	Longitudinal	rs4799782	18	34841123	DTNA	a	g	690	0.161	-+	0.8719	0.979101
	PACC	Longitudinal	rs1786604	18	34846264	DTNA	a	g	690	-1.461	--	0.1439	0.730459
	PACC	Longitudinal	rs7233779	18	34863262	DTNA	a	g	690	-0.114	+-	0.9092	0.983533
	PACC	Longitudinal	rs644982	18	34869793	DTNA	a	g	690	0.329	+-	0.7422	0.899835
	PACC	Longitudinal	rs11659517	18	34870978	DTNA	a	t	690	0.923	+-	0.356	0.76859
	PACC	Longitudinal	rs524969	18	34872102	DTNA	a	t	690	-1.529	-+	0.1263	0.730459
	PACC	Longitudinal	rs637914	18	34876135	DTNA	a	t	690	-1.718	-+	0.08587	0.730459
	PACC	Longitudinal	rs9304141	18	34879143	DTNA	t	c	690	-1.484	--	0.1377	0.730459
	PACC	Longitudinal	rs2288085	18	34879740	DTNA	a	g	690	-0.596	--	0.5514	0.812277
	PACC	Longitudinal	rs17558116	18	34882719	DTNA	t	c	690	0.698	+-	0.485	0.782512
	PACC	Longitudinal	rs10502637	18	34890006	DTNA	t	c	690	0.671	++	0.502	0.784792
	PACC	Longitudinal	rs149163416	18	34898841	DTNA	a	g	690	1.364	-+	0.1724	0.730459
	PACC	Longitudinal	20:33413780	20	33413780	SNTA1	a	t	690	1.259	++	0.2079	0.730459
	PACC	Longitudinal	rs291683	20	33431611	SNTA1	t	c	690	1.055	-+	0.2913	0.76859
	PACC	Longitudinal	20:33433270	20	33433270	SNTA1	t	c	690	-0.865	--	0.3871	0.76859
	PACC	Longitudinal	rs6141396	20	33436147	SNTA1	a	c	265	-1.398	-?	0.162	0.730459
	PACC	Longitudinal	rs293721	20	33441633	SNTA1	t	c	690	1.207	++	0.2272	0.730459
	Ventricular_Volume	Cross-Sectional	rs111599092	3	49465346	DAG1	a	g	846	0.853	++	0.3939	0.72062
	Ventricular_Volume	Cross-Sectional	rs73073015	3	49465733	DAG1	a	g	846	1.38	++	0.1675	0.48949
	Ventricular_Volume	Cross-Sectional	rs7611164	3	49471395	DAG1	t	g	846	0.449	++	0.6535	0.88971
	Ventricular_Volume	Cross-Sectional	rs1568661	3	49483525	DAG1	a	g	846	3.096	++	0.001963	0.0896437
	Ventricular_Volume	Cross-Sectional	rs7374731	3	49495661	DAG1	c	g	846	0.188	-+	0.8505	0.940881
	Ventricular_Volume	Cross-Sectional	rs73074811	3	49516098	DAG1	a	t	846	-1.323	--	0.1859	0.509366
	Ventricular_Volume	Cross-Sectional	rs3870338	3	49519618	DAG1	a	g	846	3.096	++	0.001963	0.0896437
	Ventricular_Volume	Cross-Sectional	rs55935606	3	49528072	DAG1	a	g	846	-0.321	+-	0.7484	0.915454
	Ventricular_Volume	Cross-Sectional	rs75153130	3	49530436	DAG1	a	c	846	-0.449	--	0.6535	0.88971
	Ventricular_Volume	Cross-Sectional	rs13079082	3	49537375	DAG1	c	g	846	-1.161	--	0.2457	0.570524
	Ventricular_Volume	Cross-Sectional	rs4052546	3	49538116	DAG1	c	g	846	-0.188	+-	0.8505	0.940881
	Ventricular_Volume	Cross-Sectional	rs73074830	3	49539584	DAG1	a	c	846	-1.018	--	0.3087	0.660811
	Ventricular_Volume	Cross-Sectional	rs114093899	3	49539955	DAG1	c	g	846	-0.028	-+	0.9774	0.99188
	Ventricular_Volume	Cross-Sectional	rs9789109	18	26842291	AQP4	a	g	846	0.786	-+	0.4321	0.723427
	Ventricular_Volume	Cross-Sectional	rs10164026	18	26842362	AQP4	a	c	846	-1.579	--	0.1144	0.460965
	Ventricular_Volume	Cross-Sectional	rs4800270	18	26844933	AQP4	t	g	846	1.666	-+	0.09571	0.458327
	Ventricular_Volume	Cross-Sectional	rs79668602	18	26845488	AQP4	a	g	846	-0.39	--	0.6966	0.908897
	Ventricular_Volume	Cross-Sectional	rs12458416	18	26847267	AQP4	c	g	846	-1.456	--	0.1455	0.48949
	Ventricular_Volume	Cross-Sectional	rs12953446	18	26848521	AQP4	a	g	846	2.004	++	0.04505	0.404361
	Ventricular_Volume	Cross-Sectional	rs67461489	18	26848876	AQP4	t	c	846	-1.411	+-	0.1583	0.48949
	Ventricular_Volume	Cross-Sectional	rs11661081	18	26850068	AQP4	a	c	846	-0.268	+-	0.7884	0.932427
	Ventricular_Volume	Cross-Sectional	rs3763043	18	26855854	AQP4	t	c	846	0.888	++	0.3747	0.711462
	Ventricular_Volume	Cross-Sectional	rs68006382	18	26856555	AQP4	a	g	846	0.159	+-	0.8735	0.951933
	Ventricular_Volume	Cross-Sectional	rs335930	18	26856961	AQP4	a	c	846	-0.886	+-	0.3755	0.711462
	Ventricular_Volume	Cross-Sectional	rs71353405	18	26857429	AQP4	t	c	846	0.733	-+	0.4635	0.762796
	Ventricular_Volume	Cross-Sectional	rs162009	18	26864250	AQP4	a	g	846	1.808	-+	0.07066	0.404361
	Ventricular_Volume	Cross-Sectional	rs4800773	18	26865017	AQP4	a	g	846	1.549	++	0.1215	0.462097
	Ventricular_Volume	Cross-Sectional	rs3875089	18	26865469	AQP4	t	c	846	-1.797	--	0.07227	0.404361
	Ventricular_Volume	Cross-Sectional	rs72878787	18	26866517	AQP4	a	g	846	0.044	-+	0.9649	0.99188
	Ventricular_Volume	Cross-Sectional	rs162006	18	26866570	AQP4	t	c	846	1.77	++	0.07674	0.404361
	Ventricular_Volume	Cross-Sectional	rs151244	18	26866755	AQP4	t	c	846	-2.075	--	0.03801	0.404361
	Ventricular_Volume	Cross-Sectional	rs72878794	18	26866839	AQP4	t	c	846	0.638	++	0.5236	0.82452
	Ventricular_Volume	Cross-Sectional	rs9961118	18	26866901	AQP4	t	c	846	-0.801	--	0.4233	0.723427
	Ventricular_Volume	Cross-Sectional	rs162004	18	26867972	AQP4	c	g	846	1.469	++	0.1419	0.48949
	Ventricular_Volume	Cross-Sectional	rs72878799	18	26868165	AQP4	a	g	846	1.075	++	0.2823	0.61389
	Ventricular_Volume	Cross-Sectional	rs11662318	18	26869056	AQP4	t	c	846	1.535	++	0.1248	0.462097
	Ventricular_Volume	Cross-Sectional	rs151246	18	26869139	AQP4	t	g	846	0.191	+-	0.8483	0.940881
	Ventricular_Volume	Cross-Sectional	rs491148	18	26869803	AQP4	a	g	846	-1.884	--	0.05954	0.404361
	Ventricular_Volume	Cross-Sectional	rs162002	18	26871015	AQP4	a	g	846	-1.847	--	0.06479	0.404361
	Ventricular_Volume	Cross-Sectional	rs162001	18	26871481	AQP4	a	c	846	0.523	-+	0.6011	0.88971
	Ventricular_Volume	Cross-Sectional	rs3865411	18	26871684	AQP4	a	g	846	0.047	+-	0.9621	0.99188
	Ventricular_Volume	Cross-Sectional	rs162000	18	26872471	AQP4	a	c	846	-1.402	--	0.161	0.48949
	Ventricular_Volume	Cross-Sectional	rs12969503	18	26873564	AQP4	t	g	846	-1.559	+-	0.1191	0.462097
	Ventricular_Volume	Cross-Sectional	rs8094228	18	26873767	AQP4	t	c	846	1.075	-+	0.2823	0.61389
	Ventricular_Volume	Cross-Sectional	rs480647	18	26874290	AQP4	t	c	846	0.328	+-	0.7428	0.915454
	Ventricular_Volume	Cross-Sectional	rs10502478	18	26874616	AQP4	a	c	846	0.591	++	0.5545	0.855096
	Ventricular_Volume	Cross-Sectional	rs7234562	18	34483685	DTNA	t	c	846	1.77	++	0.07673	0.404361
	Ventricular_Volume	Cross-Sectional	rs79922046	18	34485536	DTNA	a	g	846	1.732	++	0.08328	0.422569
	Ventricular_Volume	Cross-Sectional	rs9955950	18	34485672	DTNA	t	c	846	0.59	++	0.5555	0.855096
	Ventricular_Volume	Cross-Sectional	rs12957028	18	34485948	DTNA	a	g	846	-2.314	--	0.02066	0.353803
	Ventricular_Volume	Cross-Sectional	rs72639491	18	34491438	DTNA	a	g	846	1.596	++	0.1104	0.458327
	Ventricular_Volume	Cross-Sectional	rs62097347	18	34492032	DTNA	c	g	846	-0.939	-+	0.3477	0.690361
	Ventricular_Volume	Cross-Sectional	rs9961251	18	34492344	DTNA	t	c	846	1.934	++	0.05314	0.404361
	Ventricular_Volume	Cross-Sectional	rs111846993	18	34494001	DTNA	t	c	846	1.929	++	0.05368	0.404361
	Ventricular_Volume	Cross-Sectional	rs4799769	18	34494577	DTNA	c	g	846	0.64	+-	0.5223	0.82452
	Ventricular_Volume	Cross-Sectional	rs8092794	18	34496273	DTNA	a	g	846	-3.836	--	0.0001253	0.0171661
	Ventricular_Volume	Cross-Sectional	rs7243528	18	34497055	DTNA	t	c	846	1.42	++	0.1557	0.48949
	Ventricular_Volume	Cross-Sectional	rs79972565	18	34497194	DTNA	t	g	846	0.546	++	0.5847	0.880263
	Ventricular_Volume	Cross-Sectional	rs35839923	18	34497764	DTNA	a	g	846	0.512	-+	0.6083	0.88971
	Ventricular_Volume	Cross-Sectional	rs62097349	18	34499519	DTNA	a	g	846	1.622	++	0.1047	0.458327
	Ventricular_Volume	Cross-Sectional	rs9965622	18	34502153	DTNA	t	c	846	-2.588	--	0.009667	0.264876
	Ventricular_Volume	Cross-Sectional	rs62098462	18	34504364	DTNA	t	c	846	1.62	++	0.1053	0.458327
	Ventricular_Volume	Cross-Sectional	rs75127284	18	34506592	DTNA	a	c	846	-1.292	--	0.1964	0.527584
	Ventricular_Volume	Cross-Sectional	rs2439861	18	34507940	DTNA	a	g	846	1.606	++	0.1083	0.458327
	Ventricular_Volume	Cross-Sectional	rs35982920	18	34516411	DTNA	a	g	846	-0.922	+-	0.3568	0.698309
	Ventricular_Volume	Cross-Sectional	rs2509597	18	34528430	DTNA	a	t	846	-0.962	--	0.3358	0.68909
	Ventricular_Volume	Cross-Sectional	rs71363449	18	34531997	DTNA	t	c	846	-0.213	-+	0.8314	0.940881
	Ventricular_Volume	Cross-Sectional	rs2439853	18	34533937	DTNA	a	g	846	-0.419	--	0.6754	0.88971
	Ventricular_Volume	Cross-Sectional	rs2439000	18	34536414	DTNA	c	g	846	1.356	++	0.1751	0.489565
	Ventricular_Volume	Cross-Sectional	rs11875892	18	34544032	DTNA	a	g	846	-1.138	--	0.2552	0.582707
	Ventricular_Volume	Cross-Sectional	rs1967583	18	34544573	DTNA	t	c	846	-0.31	-+	0.7564	0.917051
	Ventricular_Volume	Cross-Sectional	rs28856895	18	34555507	DTNA	a	g	846	-0.329	-+	0.7419	0.915454
	Ventricular_Volume	Cross-Sectional	rs77973497	18	34560529	DTNA	a	c	846	1.393	++	0.1636	0.48949
	Ventricular_Volume	Cross-Sectional	rs2579796	18	34569243	DTNA	a	g	846	-0.42	-+	0.6742	0.88971
	Ventricular_Volume	Cross-Sectional	rs2579797	18	34571732	DTNA	t	g	846	-1.237	--	0.2162	0.558857
	Ventricular_Volume	Cross-Sectional	rs2685557	18	34576782	DTNA	t	c	846	-0.461	-+	0.6448	0.88971
	Ventricular_Volume	Cross-Sectional	rs9958492	18	34577783	DTNA	t	c	846	-0.04	-+	0.9679	0.99188
	Ventricular_Volume	Cross-Sectional	rs2579802	18	34579787	DTNA	a	c	846	-1.183	--	0.2367	0.570524
	Ventricular_Volume	Cross-Sectional	rs74920018	18	34607557	DTNA	a	t	846	0.812	++	0.4165	0.723427
	Ventricular_Volume	Cross-Sectional	rs1439127	18	34607759	DTNA	a	t	846	1.974	++	0.04838	0.404361
	Ventricular_Volume	Cross-Sectional	rs12327368	18	34611361	DTNA	a	g	846	0.427	-+	0.6695	0.88971
	Ventricular_Volume	Cross-Sectional	rs62097188	18	34611412	DTNA	a	g	846	-1.84	--	0.06579	0.404361
	Ventricular_Volume	Cross-Sectional	rs9807153	18	34635520	DTNA	a	t	846	1.218	++	0.2232	0.566267
	Ventricular_Volume	Cross-Sectional	rs2730126	18	34635939	DTNA	a	c	846	-0.192	--	0.8476	0.940881
	Ventricular_Volume	Cross-Sectional	rs1659526	18	34644451	DTNA	a	g	846	-0.88	+-	0.3791	0.711462
	Ventricular_Volume	Cross-Sectional	rs17642885	18	34649976	DTNA	t	c	846	-2.334	--	0.01959	0.353803
	Ventricular_Volume	Cross-Sectional	rs1240974	18	34650949	DTNA	t	c	846	-0.798	+-	0.425	0.723427
	Ventricular_Volume	Cross-Sectional	rs55869511	18	34651262	DTNA	a	c	846	-1.962	--	0.04979	0.404361
	Ventricular_Volume	Cross-Sectional	rs12955208	18	34656737	DTNA	a	g	846	-0.95	--	0.3421	0.689231
	Ventricular_Volume	Cross-Sectional	rs72953203	18	34660068	DTNA	a	g	846	-1.107	+-	0.2682	0.602351
	Ventricular_Volume	Cross-Sectional	rs9946070	18	34665505	DTNA	a	g	846	0.972	++	0.3312	0.68909
	Ventricular_Volume	Cross-Sectional	rs72953211	18	34673381	DTNA	a	c	846	-0.007	-+	0.9947	0.9989
	Ventricular_Volume	Cross-Sectional	rs55971592	18	34697328	DTNA	a	g	846	0.421	-+	0.6737	0.88971
	Ventricular_Volume	Cross-Sectional	rs78837792	18	34703359	DTNA	t	c	846	2.196	++	0.02811	0.404361
	Ventricular_Volume	Cross-Sectional	rs11663468	18	34707936	DTNA	t	c	846	-0.237	+-	0.8123	0.940881
	Ventricular_Volume	Cross-Sectional	rs12963825	18	34709484	DTNA	a	g	846	2.625	++	0.008656	0.264876
	Ventricular_Volume	Cross-Sectional	rs1480432	18	34727166	DTNA	t	g	846	0.357	-+	0.7209	0.915454
	Ventricular_Volume	Cross-Sectional	rs45556134	18	34729425	DTNA	a	g	846	-1.856	--	0.06344	0.404361
	Ventricular_Volume	Cross-Sectional	rs899828	18	34732688	DTNA	t	g	846	1.19	-+	0.234	0.570524
	Ventricular_Volume	Cross-Sectional	rs17556884	18	34736455	DTNA	t	c	846	-2.122	--	0.03387	0.404361
	Ventricular_Volume	Cross-Sectional	rs1480428	18	34738732	DTNA	a	g	846	-1.176	--	0.2396	0.570524
	Ventricular_Volume	Cross-Sectional	rs12957349	18	34739291	DTNA	t	c	846	-1.492	--	0.1357	0.489234
	Ventricular_Volume	Cross-Sectional	rs12608110	18	34752198	DTNA	a	g	846	-0.565	--	0.5717	0.870254
	Ventricular_Volume	Cross-Sectional	rs7228547	18	34760039	DTNA	a	g	846	-0.157	--	0.8755	0.951933
	Ventricular_Volume	Cross-Sectional	rs8099437	18	34761448	DTNA	t	g	846	-1.376	--	0.1687	0.48949
	Ventricular_Volume	Cross-Sectional	rs72955132	18	34762382	DTNA	a	g	846	-2.036	--	0.04174	0.404361
	Ventricular_Volume	Cross-Sectional	rs1817452	18	34776629	DTNA	t	c	846	-1.164	--	0.2443	0.570524
	Ventricular_Volume	Cross-Sectional	rs56404226	18	34778060	DTNA	a	g	846	0.076	+-	0.9394	0.99188
	Ventricular_Volume	Cross-Sectional	rs72955175	18	34779045	DTNA	a	t	846	-0.001	+-	0.9989	0.9989
	Ventricular_Volume	Cross-Sectional	rs12608251	18	34782906	DTNA	t	g	846	-0.187	--	0.8516	0.940881
	Ventricular_Volume	Cross-Sectional	rs76880720	18	34791141	DTNA	a	c	846	1.367	++	0.1715	0.48949
	Ventricular_Volume	Cross-Sectional	rs9989533	18	34793909	DTNA	t	c	846	-0.353	-+	0.7242	0.915454
	Ventricular_Volume	Cross-Sectional	rs79500711	18	34794379	DTNA	a	g	846	-2.499	--	0.01245	0.284275
	Ventricular_Volume	Cross-Sectional	rs138856611	18	34801684	DTNA	t	g	846	-0.79	--	0.4293	0.723427
	Ventricular_Volume	Cross-Sectional	rs62097226	18	34804223	DTNA	a	t	846	0.726	++	0.4677	0.762796
	Ventricular_Volume	Cross-Sectional	rs4458079	18	34806161	DTNA	t	c	846	0.79	+-	0.4293	0.723427
	Ventricular_Volume	Cross-Sectional	rs8086358	18	34813672	DTNA	t	g	846	-0.12	-+	0.9046	0.968205
	Ventricular_Volume	Cross-Sectional	rs72963047	18	34818804	DTNA	a	c	846	0.032	-+	0.9748	0.99188
	Ventricular_Volume	Cross-Sectional	rs17557660	18	34831178	DTNA	a	t	846	0.358	-+	0.7202	0.915454
	Ventricular_Volume	Cross-Sectional	rs1790533	18	34831631	DTNA	a	g	846	-0.145	-+	0.8845	0.954146
	Ventricular_Volume	Cross-Sectional	rs4799782	18	34841123	DTNA	a	g	846	0.851	++	0.3945	0.72062
	Ventricular_Volume	Cross-Sectional	rs1786604	18	34846264	DTNA	a	g	846	-0.267	+-	0.7895	0.932427
	Ventricular_Volume	Cross-Sectional	rs7233779	18	34863262	DTNA	a	g	846	1.782	-+	0.07471	0.404361
	Ventricular_Volume	Cross-Sectional	rs644982	18	34869793	DTNA	a	g	846	-0.321	--	0.7484	0.915454
	Ventricular_Volume	Cross-Sectional	rs11659517	18	34870978	DTNA	a	t	846	-1.442	--	0.1493	0.48949
	Ventricular_Volume	Cross-Sectional	rs524969	18	34872102	DTNA	a	t	846	0.96	++	0.337	0.68909
	Ventricular_Volume	Cross-Sectional	rs637914	18	34876135	DTNA	a	t	846	0.66	++	0.5095	0.821194
	Ventricular_Volume	Cross-Sectional	rs9304141	18	34879143	DTNA	t	c	846	1.25	++	0.2112	0.556431
	Ventricular_Volume	Cross-Sectional	rs2288085	18	34879740	DTNA	a	g	846	0.462	-+	0.6438	0.88971
	Ventricular_Volume	Cross-Sectional	rs17558116	18	34882719	DTNA	t	c	846	-0.784	-+	0.433	0.723427
	Ventricular_Volume	Cross-Sectional	rs10502637	18	34890006	DTNA	t	c	846	0.459	++	0.6462	0.88971
	Ventricular_Volume	Cross-Sectional	rs149163416	18	34898841	DTNA	a	g	846	-0.486	--	0.627	0.88971
	Ventricular_Volume	Cross-Sectional	20:33413780	20	33413780	SNTA1	a	t	846	-0.277	-+	0.7821	0.932427
	Ventricular_Volume	Cross-Sectional	rs291683	20	33431611	SNTA1	t	c	846	-0.201	--	0.8406	0.940881
	Ventricular_Volume	Cross-Sectional	20:33433270	20	33433270	SNTA1	t	c	846	0.453	++	0.6508	0.88971
	Ventricular_Volume	Cross-Sectional	rs6141396	20	33436147	SNTA1	a	c	328	1.658	+?	0.09741	0.458327
	Ventricular_Volume	Cross-Sectional	rs293721	20	33441633	SNTA1	t	c	846	-0.068	-+	0.9455	0.99188
	Ventricular_Volume	Longitudinal	rs111599092	3	49465346	DAG1	a	g	309	-1.223	--	0.2212	0.581862
	Ventricular_Volume	Longitudinal	rs73073015	3	49465733	DAG1	a	g	309	-1.609	-+	0.1075	0.350655
	Ventricular_Volume	Longitudinal	rs7611164	3	49471395	DAG1	t	g	309	-0.222	+-	0.824	0.917789
	Ventricular_Volume	Longitudinal	rs1568661	3	49483525	DAG1	a	g	309	-0.677	--	0.4985	0.73091
	Ventricular_Volume	Longitudinal	rs7374731	3	49495661	DAG1	c	g	309	0.917	+-	0.3593	0.692591
	Ventricular_Volume	Longitudinal	rs73074811	3	49516098	DAG1	a	t	309	-0.806	--	0.4204	0.728272
	Ventricular_Volume	Longitudinal	rs3870338	3	49519618	DAG1	a	g	309	-0.677	--	0.4985	0.73091
	Ventricular_Volume	Longitudinal	rs55935606	3	49528072	DAG1	a	g	309	-0.98	--	0.3272	0.659212
	Ventricular_Volume	Longitudinal	rs75153130	3	49530436	DAG1	a	c	309	0.222	-+	0.824	0.917789
	Ventricular_Volume	Longitudinal	rs13079082	3	49537375	DAG1	c	g	309	-0.055	+-	0.9565	0.980311
	Ventricular_Volume	Longitudinal	rs4052546	3	49538116	DAG1	c	g	309	-0.917	-+	0.3593	0.692591
	Ventricular_Volume	Longitudinal	rs73074830	3	49539584	DAG1	a	c	309	1.114	++	0.2654	0.587203
	Ventricular_Volume	Longitudinal	rs114093899	3	49539955	DAG1	c	g	309	-0.471	-+	0.6376	0.808807
	Ventricular_Volume	Longitudinal	rs9789109	18	26842291	AQP4	a	g	309	1.912	++	0.05583	0.246733
	Ventricular_Volume	Longitudinal	rs10164026	18	26842362	AQP4	a	c	309	0.273	-+	0.785	0.896208
	Ventricular_Volume	Longitudinal	rs4800270	18	26844933	AQP4	t	g	309	2.582	++	0.009829	0.112214
	Ventricular_Volume	Longitudinal	rs79668602	18	26845488	AQP4	a	g	309	2.051	++	0.04025	0.230747
	Ventricular_Volume	Longitudinal	rs12458416	18	26847267	AQP4	c	g	309	-0.787	--	0.4312	0.728272
	Ventricular_Volume	Longitudinal	rs12953446	18	26848521	AQP4	a	g	309	1.694	++	0.0902	0.325195
	Ventricular_Volume	Longitudinal	rs67461489	18	26848876	AQP4	t	c	309	-0.829	--	0.4073	0.728272
	Ventricular_Volume	Longitudinal	rs11661081	18	26850068	AQP4	a	c	309	-0.109	-+	0.9132	0.962372
	Ventricular_Volume	Longitudinal	rs3763043	18	26855854	AQP4	t	c	309	1.849	++	0.0645	0.26989
	Ventricular_Volume	Longitudinal	rs68006382	18	26856555	AQP4	a	g	309	-1.475	--	0.1402	0.436532
	Ventricular_Volume	Longitudinal	rs335930	18	26856961	AQP4	a	c	309	-1.12	--	0.2627	0.587203
	Ventricular_Volume	Longitudinal	rs71353405	18	26857429	AQP4	t	c	309	0.682	++	0.495	0.73091
	Ventricular_Volume	Longitudinal	rs162009	18	26864250	AQP4	a	g	309	1.998	++	0.04576	0.230747
	Ventricular_Volume	Longitudinal	rs4800773	18	26865017	AQP4	a	g	309	-0.175	+-	0.8612	0.936562
	Ventricular_Volume	Longitudinal	rs3875089	18	26865469	AQP4	t	c	309	-0.709	-+	0.4781	0.73091
	Ventricular_Volume	Longitudinal	rs72878787	18	26866517	AQP4	a	g	309	0.322	+-	0.7477	0.875512
	Ventricular_Volume	Longitudinal	rs162006	18	26866570	AQP4	t	c	309	1.366	++	0.1718	0.489286
	Ventricular_Volume	Longitudinal	rs151244	18	26866755	AQP4	t	c	309	-1.319	--	0.1871	0.502602
	Ventricular_Volume	Longitudinal	rs72878794	18	26866839	AQP4	t	c	309	0.125	-+	0.9005	0.956345
	Ventricular_Volume	Longitudinal	rs9961118	18	26866901	AQP4	t	c	309	-0.166	-+	0.8682	0.936562
	Ventricular_Volume	Longitudinal	rs162004	18	26867972	AQP4	c	g	309	-1.071	+-	0.2842	0.58993
	Ventricular_Volume	Longitudinal	rs72878799	18	26868165	AQP4	a	g	309	-2.81	--	0.004947	0.0907077
	Ventricular_Volume	Longitudinal	rs11662318	18	26869056	AQP4	t	c	309	0.615	+-	0.5387	0.764516
	Ventricular_Volume	Longitudinal	rs151246	18	26869139	AQP4	t	g	309	-1.747	--	0.08066	0.308212
	Ventricular_Volume	Longitudinal	rs491148	18	26869803	AQP4	a	g	309	-1.009	-+	0.313	0.640015
	Ventricular_Volume	Longitudinal	rs162002	18	26871015	AQP4	a	g	309	-0.691	-+	0.4897	0.73091
	Ventricular_Volume	Longitudinal	rs162001	18	26871481	AQP4	a	c	309	-0.512	--	0.6086	0.792661
	Ventricular_Volume	Longitudinal	rs3865411	18	26871684	AQP4	a	g	309	-0.678	-+	0.498	0.73091
	Ventricular_Volume	Longitudinal	rs162000	18	26872471	AQP4	a	c	309	0.4	-+	0.6891	0.820583
	Ventricular_Volume	Longitudinal	rs12969503	18	26873564	AQP4	t	g	309	0.045	-+	0.9641	0.980311
	Ventricular_Volume	Longitudinal	rs8094228	18	26873767	AQP4	t	c	309	-0.043	+-	0.966	0.980311
	Ventricular_Volume	Longitudinal	rs480647	18	26874290	AQP4	t	c	309	-2.206	--	0.0274	0.209153
	Ventricular_Volume	Longitudinal	rs10502478	18	26874616	AQP4	a	c	309	-0.751	-+	0.4525	0.73091
	Ventricular_Volume	Longitudinal	rs7234562	18	34483685	DTNA	t	c	309	0.752	++	0.4518	0.73091
	Ventricular_Volume	Longitudinal	rs79922046	18	34485536	DTNA	a	g	309	0.729	-+	0.4657	0.73091
	Ventricular_Volume	Longitudinal	rs9955950	18	34485672	DTNA	t	c	309	-0.291	+-	0.7711	0.892227
	Ventricular_Volume	Longitudinal	rs12957028	18	34485948	DTNA	a	g	309	-0.505	--	0.6133	0.792661
	Ventricular_Volume	Longitudinal	rs72639491	18	34491438	DTNA	a	g	309	-0.402	+-	0.6877	0.820583
	Ventricular_Volume	Longitudinal	rs62097347	18	34492032	DTNA	c	g	309	1.325	++	0.1851	0.502602
	Ventricular_Volume	Longitudinal	rs9961251	18	34492344	DTNA	t	c	309	0.623	-+	0.533	0.764516
	Ventricular_Volume	Longitudinal	rs111846993	18	34494001	DTNA	t	c	309	-1.95	--	0.05112	0.233448
	Ventricular_Volume	Longitudinal	rs4799769	18	34494577	DTNA	c	g	309	-1.116	--	0.2643	0.587203
	Ventricular_Volume	Longitudinal	rs8092794	18	34496273	DTNA	a	g	309	-0.191	--	0.8487	0.936562
	Ventricular_Volume	Longitudinal	rs7243528	18	34497055	DTNA	t	c	309	2.715	++	0.006621	0.0907077
	Ventricular_Volume	Longitudinal	rs79972565	18	34497194	DTNA	t	g	309	2.788	++	0.005307	0.0907077
	Ventricular_Volume	Longitudinal	rs35839923	18	34497764	DTNA	a	g	309	-0.795	-+	0.4267	0.728272
	Ventricular_Volume	Longitudinal	rs62097349	18	34499519	DTNA	a	g	309	-0.485	-+	0.6278	0.803819
	Ventricular_Volume	Longitudinal	rs9965622	18	34502153	DTNA	t	c	309	0.916	+-	0.3596	0.692591
	Ventricular_Volume	Longitudinal	rs62098462	18	34504364	DTNA	t	c	309	-0.611	+-	0.5413	0.764516
	Ventricular_Volume	Longitudinal	rs75127284	18	34506592	DTNA	a	c	309	-1.213	-+	0.2251	0.581862
	Ventricular_Volume	Longitudinal	rs2439861	18	34507940	DTNA	a	g	309	2.038	++	0.04156	0.230747
	Ventricular_Volume	Longitudinal	rs35982920	18	34516411	DTNA	a	g	309	0.536	+-	0.5919	0.787284
	Ventricular_Volume	Longitudinal	rs2509597	18	34528430	DTNA	a	t	309	2.751	++	0.005939	0.0907077
	Ventricular_Volume	Longitudinal	rs71363449	18	34531997	DTNA	t	c	309	1.114	-+	0.2651	0.587203
	Ventricular_Volume	Longitudinal	rs2439853	18	34533937	DTNA	a	g	309	-1.766	--	0.07741	0.308212
	Ventricular_Volume	Longitudinal	rs2439000	18	34536414	DTNA	c	g	309	3.018	++	0.002542	0.0907077
	Ventricular_Volume	Longitudinal	rs11875892	18	34544032	DTNA	a	g	309	1.369	++	0.1711	0.489286
	Ventricular_Volume	Longitudinal	rs1967583	18	34544573	DTNA	t	c	309	-0.889	--	0.3741	0.692591
	Ventricular_Volume	Longitudinal	rs28856895	18	34555507	DTNA	a	g	309	0.392	++	0.6948	0.820583
	Ventricular_Volume	Longitudinal	rs77973497	18	34560529	DTNA	a	c	309	-0.399	--	0.6896	0.820583
	Ventricular_Volume	Longitudinal	rs2579796	18	34569243	DTNA	a	g	309	-2.025	--	0.0429	0.230747
	Ventricular_Volume	Longitudinal	rs2579797	18	34571732	DTNA	t	g	309	-3.239	--	0.001197	0.0907077
	Ventricular_Volume	Longitudinal	rs2685557	18	34576782	DTNA	t	c	309	-2.089	--	0.03672	0.230747
	Ventricular_Volume	Longitudinal	rs9958492	18	34577783	DTNA	t	c	309	1.089	-+	0.2762	0.587203
	Ventricular_Volume	Longitudinal	rs2579802	18	34579787	DTNA	a	c	309	-2.728	--	0.006376	0.0907077
	Ventricular_Volume	Longitudinal	rs74920018	18	34607557	DTNA	a	t	309	-0.421	--	0.6739	0.820583
	Ventricular_Volume	Longitudinal	rs1439127	18	34607759	DTNA	a	t	309	-0.748	-+	0.4547	0.73091
	Ventricular_Volume	Longitudinal	rs12327368	18	34611361	DTNA	a	g	309	1.188	-+	0.235	0.582739
	Ventricular_Volume	Longitudinal	rs62097188	18	34611412	DTNA	a	g	309	0.552	+-	0.5808	0.780094
	Ventricular_Volume	Longitudinal	rs9807153	18	34635520	DTNA	a	t	309	0.574	-+	0.5656	0.780094
	Ventricular_Volume	Longitudinal	rs2730126	18	34635939	DTNA	a	c	309	-1.514	--	0.13	0.414186
	Ventricular_Volume	Longitudinal	rs1659526	18	34644451	DTNA	a	g	309	-2.337	--	0.01943	0.190136
	Ventricular_Volume	Longitudinal	rs17642885	18	34649976	DTNA	t	c	309	0.575	++	0.565	0.780094
	Ventricular_Volume	Longitudinal	rs1240974	18	34650949	DTNA	t	c	309	-2.441	--	0.01463	0.154178
	Ventricular_Volume	Longitudinal	rs55869511	18	34651262	DTNA	a	c	309	-1.098	--	0.2722	0.587203
	Ventricular_Volume	Longitudinal	rs12955208	18	34656737	DTNA	a	g	309	-1.745	--	0.08099	0.308212
	Ventricular_Volume	Longitudinal	rs72953203	18	34660068	DTNA	a	g	309	2.043	++	0.04105	0.230747
	Ventricular_Volume	Longitudinal	rs9946070	18	34665505	DTNA	a	g	309	-1.096	+-	0.2733	0.587203
	Ventricular_Volume	Longitudinal	rs72953211	18	34673381	DTNA	a	c	309	1.356	-+	0.175	0.489286
	Ventricular_Volume	Longitudinal	rs55971592	18	34697328	DTNA	a	g	309	0.286	-+	0.775	0.892227
	Ventricular_Volume	Longitudinal	rs78837792	18	34703359	DTNA	t	c	309	-0.795	-+	0.4263	0.728272
	Ventricular_Volume	Longitudinal	rs11663468	18	34707936	DTNA	t	c	309	-2.205	--	0.02748	0.209153
	Ventricular_Volume	Longitudinal	rs12963825	18	34709484	DTNA	a	g	309	0.889	++	0.3739	0.692591
	Ventricular_Volume	Longitudinal	rs1480432	18	34727166	DTNA	t	g	309	-2.003	--	0.04522	0.230747
	Ventricular_Volume	Longitudinal	rs45556134	18	34729425	DTNA	a	g	309	0.052	+-	0.9587	0.980311
	Ventricular_Volume	Longitudinal	rs899828	18	34732688	DTNA	t	g	309	-0.418	-+	0.6757	0.820583
	Ventricular_Volume	Longitudinal	rs17556884	18	34736455	DTNA	t	c	309	-0.725	--	0.4685	0.73091
	Ventricular_Volume	Longitudinal	rs1480428	18	34738732	DTNA	a	g	309	1.179	++	0.2382	0.582739
	Ventricular_Volume	Longitudinal	rs12957349	18	34739291	DTNA	t	c	309	-1.631	--	0.1029	0.349851
	Ventricular_Volume	Longitudinal	rs12608110	18	34752198	DTNA	a	g	309	-0.088	-+	0.9301	0.9727
	Ventricular_Volume	Longitudinal	rs7228547	18	34760039	DTNA	a	g	309	2.079	++	0.03765	0.230747
	Ventricular_Volume	Longitudinal	rs8099437	18	34761448	DTNA	t	g	309	1.179	++	0.2382	0.582739
	Ventricular_Volume	Longitudinal	rs72955132	18	34762382	DTNA	a	g	309	-0.779	+-	0.4359	0.728272
	Ventricular_Volume	Longitudinal	rs1817452	18	34776629	DTNA	t	c	309	-1.118	--	0.2637	0.587203
	Ventricular_Volume	Longitudinal	rs56404226	18	34778060	DTNA	a	g	309	0.427	+-	0.6697	0.820583
	Ventricular_Volume	Longitudinal	rs72955175	18	34779045	DTNA	a	t	309	1.97	++	0.04886	0.230821
	Ventricular_Volume	Longitudinal	rs12608251	18	34782906	DTNA	t	g	309	-2.591	--	0.009564	0.112214
	Ventricular_Volume	Longitudinal	rs76880720	18	34791141	DTNA	a	c	309	1.44	++	0.15	0.456667
	Ventricular_Volume	Longitudinal	rs9989533	18	34793909	DTNA	t	c	309	-0.143	-+	0.8862	0.948511
	Ventricular_Volume	Longitudinal	rs79500711	18	34794379	DTNA	a	g	309	0.169	++	0.8657	0.936562
	Ventricular_Volume	Longitudinal	rs138856611	18	34801684	DTNA	t	g	309	-0.672	+-	0.5015	0.73091
	Ventricular_Volume	Longitudinal	rs62097226	18	34804223	DTNA	a	t	309	-0.901	--	0.3678	0.692591
	Ventricular_Volume	Longitudinal	rs4458079	18	34806161	DTNA	t	c	309	0.253	+-	0.7999	0.905672
	Ventricular_Volume	Longitudinal	rs8086358	18	34813672	DTNA	t	g	309	-1.622	--	0.1047	0.349851
	Ventricular_Volume	Longitudinal	rs72963047	18	34818804	DTNA	a	c	309	-2.182	--	0.02911	0.209898
	Ventricular_Volume	Longitudinal	rs17557660	18	34831178	DTNA	a	t	309	-0.816	-+	0.4144	0.728272
	Ventricular_Volume	Longitudinal	rs1790533	18	34831631	DTNA	a	g	309	-2.769	--	0.00563	0.0907077
	Ventricular_Volume	Longitudinal	rs4799782	18	34841123	DTNA	a	g	309	0.783	++	0.4339	0.728272
	Ventricular_Volume	Longitudinal	rs1786604	18	34846264	DTNA	a	g	309	2.27	++	0.02322	0.209153
	Ventricular_Volume	Longitudinal	rs7233779	18	34863262	DTNA	a	g	309	-1.635	--	0.102	0.349851
	Ventricular_Volume	Longitudinal	rs644982	18	34869793	DTNA	a	g	309	-1.845	--	0.06501	0.26989
	Ventricular_Volume	Longitudinal	rs11659517	18	34870978	DTNA	a	t	309	-1.71	--	0.08728	0.323172
	Ventricular_Volume	Longitudinal	rs524969	18	34872102	DTNA	a	t	309	2.781	++	0.005427	0.0907077
	Ventricular_Volume	Longitudinal	rs637914	18	34876135	DTNA	a	t	309	2.234	++	0.02548	0.209153
	Ventricular_Volume	Longitudinal	rs9304141	18	34879143	DTNA	t	c	309	-1.083	--	0.2786	0.587203
	Ventricular_Volume	Longitudinal	rs2288085	18	34879740	DTNA	a	g	309	-1.415	--	0.1572	0.468183
	Ventricular_Volume	Longitudinal	rs17558116	18	34882719	DTNA	t	c	309	-1.985	--	0.04716	0.230747
	Ventricular_Volume	Longitudinal	rs10502637	18	34890006	DTNA	t	c	309	-0.024	-+	0.9806	0.9878
	Ventricular_Volume	Longitudinal	rs149163416	18	34898841	DTNA	a	g	309	0.555	++	0.5786	0.780094
	Ventricular_Volume	Longitudinal	20:33413780	20	33413780	SNTA1	a	t	309	0.524	+-	0.6001	0.790516
	Ventricular_Volume	Longitudinal	rs291683	20	33431611	SNTA1	t	c	309	-0.44	+-	0.6602	0.820583
	Ventricular_Volume	Longitudinal	20:33433270	20	33433270	SNTA1	t	c	309	-0.015	+-	0.9878	0.9878
	Ventricular_Volume	Longitudinal	rs6141396	20	33436147	SNTA1	a	c	169	-0.561	-?	0.5749	0.780094
	Ventricular_Volume	Longitudinal	rs293721	20	33441633	SNTA1	t	c	309	-2.785	--	0.005351	0.0907077
	White_Matter_Volume	Cross-Sectional	rs111599092	3	49465346	DAG1	a	g	846	2.164	++	0.03047	0.630787
	White_Matter_Volume	Cross-Sectional	rs73073015	3	49465733	DAG1	a	g	846	0.846	-+	0.3973	0.962914
	White_Matter_Volume	Cross-Sectional	rs7611164	3	49471395	DAG1	t	g	846	0.767	-+	0.4428	0.962914
	White_Matter_Volume	Cross-Sectional	rs1568661	3	49483525	DAG1	a	g	846	1.553	++	0.1205	0.825425
	White_Matter_Volume	Cross-Sectional	rs7374731	3	49495661	DAG1	c	g	846	0.494	++	0.6216	0.96692
	White_Matter_Volume	Cross-Sectional	rs73074811	3	49516098	DAG1	a	t	846	-1.374	--	0.1693	0.883904
	White_Matter_Volume	Cross-Sectional	rs3870338	3	49519618	DAG1	a	g	846	1.553	++	0.1205	0.825425
	White_Matter_Volume	Cross-Sectional	rs55935606	3	49528072	DAG1	a	g	846	-1.052	--	0.2927	0.940226
	White_Matter_Volume	Cross-Sectional	rs75153130	3	49530436	DAG1	a	c	846	-0.767	+-	0.4428	0.962914
	White_Matter_Volume	Cross-Sectional	rs13079082	3	49537375	DAG1	c	g	846	-1.656	--	0.09781	0.8083
	White_Matter_Volume	Cross-Sectional	rs4052546	3	49538116	DAG1	c	g	846	-0.494	--	0.6216	0.96692
	White_Matter_Volume	Cross-Sectional	rs73074830	3	49539584	DAG1	a	c	846	-2.141	--	0.03223	0.630787
	White_Matter_Volume	Cross-Sectional	rs114093899	3	49539955	DAG1	c	g	846	-0.951	--	0.3414	0.940226
	White_Matter_Volume	Cross-Sectional	rs9789109	18	26842291	AQP4	a	g	846	1.156	++	0.2476	0.940226
	White_Matter_Volume	Cross-Sectional	rs10164026	18	26842362	AQP4	a	c	846	0.327	-+	0.7439	0.96692
	White_Matter_Volume	Cross-Sectional	rs4800270	18	26844933	AQP4	t	g	846	0.322	-+	0.7475	0.96692
	White_Matter_Volume	Cross-Sectional	rs79668602	18	26845488	AQP4	a	g	846	1.19	++	0.234	0.940226
	White_Matter_Volume	Cross-Sectional	rs12458416	18	26847267	AQP4	c	g	846	-1.124	+-	0.261	0.940226
	White_Matter_Volume	Cross-Sectional	rs12953446	18	26848521	AQP4	a	g	846	0.619	++	0.5359	0.96692
	White_Matter_Volume	Cross-Sectional	rs67461489	18	26848876	AQP4	t	c	846	0.36	++	0.7188	0.96692
	White_Matter_Volume	Cross-Sectional	rs11661081	18	26850068	AQP4	a	c	846	0.541	++	0.5884	0.96692
	White_Matter_Volume	Cross-Sectional	rs3763043	18	26855854	AQP4	t	c	846	1.286	-+	0.1983	0.940226
	White_Matter_Volume	Cross-Sectional	rs68006382	18	26856555	AQP4	a	g	846	0.217	+-	0.8282	0.96692
	White_Matter_Volume	Cross-Sectional	rs335930	18	26856961	AQP4	a	c	846	-0.272	-+	0.7856	0.96692
	White_Matter_Volume	Cross-Sectional	rs71353405	18	26857429	AQP4	t	c	846	-0.139	-+	0.8897	0.96692
	White_Matter_Volume	Cross-Sectional	rs162009	18	26864250	AQP4	a	g	846	0.083	+-	0.934	0.987853
	White_Matter_Volume	Cross-Sectional	rs4800773	18	26865017	AQP4	a	g	846	0.776	-+	0.4378	0.962914
	White_Matter_Volume	Cross-Sectional	rs3875089	18	26865469	AQP4	t	c	846	0.065	-+	0.9479	0.987853
	White_Matter_Volume	Cross-Sectional	rs72878787	18	26866517	AQP4	a	g	846	-1.643	--	0.1003	0.8083
	White_Matter_Volume	Cross-Sectional	rs162006	18	26866570	AQP4	t	c	846	-0.288	+-	0.7734	0.96692
	White_Matter_Volume	Cross-Sectional	rs151244	18	26866755	AQP4	t	c	846	0.442	-+	0.6583	0.96692
	White_Matter_Volume	Cross-Sectional	rs72878794	18	26866839	AQP4	t	c	846	-1.07	-+	0.2846	0.940226
	White_Matter_Volume	Cross-Sectional	rs9961118	18	26866901	AQP4	t	c	846	0.278	-+	0.7811	0.96692
	White_Matter_Volume	Cross-Sectional	rs162004	18	26867972	AQP4	c	g	846	-0.797	+-	0.4252	0.962914
	White_Matter_Volume	Cross-Sectional	rs72878799	18	26868165	AQP4	a	g	846	-0.895	+-	0.3706	0.940226
	White_Matter_Volume	Cross-Sectional	rs11662318	18	26869056	AQP4	t	c	846	-0.43	+-	0.6669	0.96692
	White_Matter_Volume	Cross-Sectional	rs151246	18	26869139	AQP4	t	g	846	-0.978	+-	0.328	0.940226
	White_Matter_Volume	Cross-Sectional	rs491148	18	26869803	AQP4	a	g	846	0.52	-+	0.6032	0.96692
	White_Matter_Volume	Cross-Sectional	rs162002	18	26871015	AQP4	a	g	846	-0.335	-+	0.7375	0.96692
	White_Matter_Volume	Cross-Sectional	rs162001	18	26871481	AQP4	a	c	846	0.005	+-	0.9961	0.9961
	White_Matter_Volume	Cross-Sectional	rs3865411	18	26871684	AQP4	a	g	846	0.329	-+	0.7424	0.96692
	White_Matter_Volume	Cross-Sectional	rs162000	18	26872471	AQP4	a	c	846	0.909	-+	0.3632	0.940226
	White_Matter_Volume	Cross-Sectional	rs12969503	18	26873564	AQP4	t	g	846	-1.059	-+	0.2896	0.940226
	White_Matter_Volume	Cross-Sectional	rs8094228	18	26873767	AQP4	t	c	846	0.848	+-	0.3962	0.962914
	White_Matter_Volume	Cross-Sectional	rs480647	18	26874290	AQP4	t	c	846	-1.954	--	0.05074	0.695138
	White_Matter_Volume	Cross-Sectional	rs10502478	18	26874616	AQP4	a	c	846	-0.616	--	0.5379	0.96692
	White_Matter_Volume	Cross-Sectional	rs7234562	18	34483685	DTNA	t	c	846	-2.69	--	0.007147	0.436482
	White_Matter_Volume	Cross-Sectional	rs79922046	18	34485536	DTNA	a	g	846	-1.781	+-	0.07487	0.789015
	White_Matter_Volume	Cross-Sectional	rs9955950	18	34485672	DTNA	t	c	846	0.829	+-	0.407	0.962914
	White_Matter_Volume	Cross-Sectional	rs12957028	18	34485948	DTNA	a	g	846	1.99	++	0.04655	0.695138
	White_Matter_Volume	Cross-Sectional	rs72639491	18	34491438	DTNA	a	g	846	-1.427	--	0.1536	0.881938
	White_Matter_Volume	Cross-Sectional	rs62097347	18	34492032	DTNA	c	g	846	-0.13	-+	0.8968	0.96692
	White_Matter_Volume	Cross-Sectional	rs9961251	18	34492344	DTNA	t	c	846	-0.75	--	0.4534	0.96692
	White_Matter_Volume	Cross-Sectional	rs111846993	18	34494001	DTNA	t	c	846	-1.582	--	0.1137	0.825425
	White_Matter_Volume	Cross-Sectional	rs4799769	18	34494577	DTNA	c	g	846	-0.906	--	0.365	0.940226
	White_Matter_Volume	Cross-Sectional	rs8092794	18	34496273	DTNA	a	g	846	1.888	++	0.05897	0.734445
	White_Matter_Volume	Cross-Sectional	rs7243528	18	34497055	DTNA	t	c	846	-1.398	--	0.162	0.883904
	White_Matter_Volume	Cross-Sectional	rs79972565	18	34497194	DTNA	t	g	846	-1.481	--	0.1385	0.881938
	White_Matter_Volume	Cross-Sectional	rs35839923	18	34497764	DTNA	a	g	846	-0.167	+-	0.8675	0.96692
	White_Matter_Volume	Cross-Sectional	rs62097349	18	34499519	DTNA	a	g	846	0.263	++	0.7922	0.96692
	White_Matter_Volume	Cross-Sectional	rs9965622	18	34502153	DTNA	t	c	846	1.359	++	0.1742	0.883904
	White_Matter_Volume	Cross-Sectional	rs62098462	18	34504364	DTNA	t	c	846	0.278	-+	0.7808	0.96692
	White_Matter_Volume	Cross-Sectional	rs75127284	18	34506592	DTNA	a	c	846	1.685	++	0.09194	0.8083
	White_Matter_Volume	Cross-Sectional	rs2439861	18	34507940	DTNA	a	g	846	-1.215	--	0.2245	0.940226
	White_Matter_Volume	Cross-Sectional	rs35982920	18	34516411	DTNA	a	g	846	1.056	++	0.2908	0.940226
	White_Matter_Volume	Cross-Sectional	rs2509597	18	34528430	DTNA	a	t	846	-0.25	--	0.8027	0.96692
	White_Matter_Volume	Cross-Sectional	rs71363449	18	34531997	DTNA	t	c	846	0.315	+-	0.753	0.96692
	White_Matter_Volume	Cross-Sectional	rs2439853	18	34533937	DTNA	a	g	846	0.324	++	0.7458	0.96692
	White_Matter_Volume	Cross-Sectional	rs2439000	18	34536414	DTNA	c	g	846	-0.43	+-	0.6672	0.96692
	White_Matter_Volume	Cross-Sectional	rs11875892	18	34544032	DTNA	a	g	846	1.806	++	0.07095	0.789015
	White_Matter_Volume	Cross-Sectional	rs1967583	18	34544573	DTNA	t	c	846	1.026	+-	0.3051	0.940226
	White_Matter_Volume	Cross-Sectional	rs28856895	18	34555507	DTNA	a	g	846	0.938	++	0.3484	0.940226
	White_Matter_Volume	Cross-Sectional	rs77973497	18	34560529	DTNA	a	c	846	0.663	++	0.507	0.96692
	White_Matter_Volume	Cross-Sectional	rs2579796	18	34569243	DTNA	a	g	846	0.559	++	0.5764	0.96692
	White_Matter_Volume	Cross-Sectional	rs2579797	18	34571732	DTNA	t	g	846	0.463	-+	0.6436	0.96692
	White_Matter_Volume	Cross-Sectional	rs2685557	18	34576782	DTNA	t	c	846	0.611	++	0.5415	0.96692
	White_Matter_Volume	Cross-Sectional	rs9958492	18	34577783	DTNA	t	c	846	0.401	+-	0.6882	0.96692
	White_Matter_Volume	Cross-Sectional	rs2579802	18	34579787	DTNA	a	c	846	0.226	-+	0.8211	0.96692
	White_Matter_Volume	Cross-Sectional	rs74920018	18	34607557	DTNA	a	t	846	1.424	++	0.1545	0.881938
	White_Matter_Volume	Cross-Sectional	rs1439127	18	34607759	DTNA	a	t	846	-1.192	+-	0.2334	0.940226
	White_Matter_Volume	Cross-Sectional	rs12327368	18	34611361	DTNA	a	g	846	0.311	+-	0.7556	0.96692
	White_Matter_Volume	Cross-Sectional	rs62097188	18	34611412	DTNA	a	g	846	0.924	+-	0.3553	0.940226
	White_Matter_Volume	Cross-Sectional	rs9807153	18	34635520	DTNA	a	t	846	-2.853	--	0.00433	0.436482
	White_Matter_Volume	Cross-Sectional	rs2730126	18	34635939	DTNA	a	c	846	-0.137	--	0.8913	0.96692
	White_Matter_Volume	Cross-Sectional	rs1659526	18	34644451	DTNA	a	g	846	-0.125	-+	0.9007	0.96692
	White_Matter_Volume	Cross-Sectional	rs17642885	18	34649976	DTNA	t	c	846	1.134	++	0.257	0.940226
	White_Matter_Volume	Cross-Sectional	rs1240974	18	34650949	DTNA	t	c	846	-0.913	--	0.361	0.940226
	White_Matter_Volume	Cross-Sectional	rs55869511	18	34651262	DTNA	a	c	846	0.024	-+	0.9808	0.988012
	White_Matter_Volume	Cross-Sectional	rs12955208	18	34656737	DTNA	a	g	846	-0.06	+-	0.9518	0.987853
	White_Matter_Volume	Cross-Sectional	rs72953203	18	34660068	DTNA	a	g	846	0.04	-+	0.9681	0.988012
	White_Matter_Volume	Cross-Sectional	rs9946070	18	34665505	DTNA	a	g	846	-0.155	-+	0.8772	0.96692
	White_Matter_Volume	Cross-Sectional	rs72953211	18	34673381	DTNA	a	c	846	0.032	+-	0.9745	0.988012
	White_Matter_Volume	Cross-Sectional	rs55971592	18	34697328	DTNA	a	g	846	-0.164	-+	0.8699	0.96692
	White_Matter_Volume	Cross-Sectional	rs78837792	18	34703359	DTNA	t	c	846	-2.591	--	0.009558	0.436482
	White_Matter_Volume	Cross-Sectional	rs11663468	18	34707936	DTNA	t	c	846	-0.376	-+	0.7069	0.96692
	White_Matter_Volume	Cross-Sectional	rs12963825	18	34709484	DTNA	a	g	846	-1.426	--	0.1538	0.881938
	White_Matter_Volume	Cross-Sectional	rs1480432	18	34727166	DTNA	t	g	846	-0.915	+-	0.3602	0.940226
	White_Matter_Volume	Cross-Sectional	rs45556134	18	34729425	DTNA	a	g	846	0.327	+-	0.744	0.96692
	White_Matter_Volume	Cross-Sectional	rs899828	18	34732688	DTNA	t	g	846	-2.025	--	0.04292	0.695138
	White_Matter_Volume	Cross-Sectional	rs17556884	18	34736455	DTNA	t	c	846	0.659	++	0.5101	0.96692
	White_Matter_Volume	Cross-Sectional	rs1480428	18	34738732	DTNA	a	g	846	0.54	++	0.5891	0.96692
	White_Matter_Volume	Cross-Sectional	rs12957349	18	34739291	DTNA	t	c	846	0.253	+-	0.8001	0.96692
	White_Matter_Volume	Cross-Sectional	rs12608110	18	34752198	DTNA	a	g	846	-0.785	+-	0.4323	0.962914
	White_Matter_Volume	Cross-Sectional	rs7228547	18	34760039	DTNA	a	g	846	0.147	+-	0.8832	0.96692
	White_Matter_Volume	Cross-Sectional	rs8099437	18	34761448	DTNA	t	g	846	0.423	++	0.6724	0.96692
	White_Matter_Volume	Cross-Sectional	rs72955132	18	34762382	DTNA	a	g	846	0.628	-+	0.5298	0.96692
	White_Matter_Volume	Cross-Sectional	rs1817452	18	34776629	DTNA	t	c	846	0.704	+-	0.4815	0.96692
	White_Matter_Volume	Cross-Sectional	rs56404226	18	34778060	DTNA	a	g	846	1.05	-+	0.2938	0.940226
	White_Matter_Volume	Cross-Sectional	rs72955175	18	34779045	DTNA	a	t	846	0.355	+-	0.7229	0.96692
	White_Matter_Volume	Cross-Sectional	rs12608251	18	34782906	DTNA	t	g	846	-0.241	+-	0.8099	0.96692
	White_Matter_Volume	Cross-Sectional	rs76880720	18	34791141	DTNA	a	c	846	-0.409	-+	0.6823	0.96692
	White_Matter_Volume	Cross-Sectional	rs9989533	18	34793909	DTNA	t	c	846	0.442	+-	0.6584	0.96692
	White_Matter_Volume	Cross-Sectional	rs79500711	18	34794379	DTNA	a	g	846	2.4	++	0.01642	0.538136
	White_Matter_Volume	Cross-Sectional	rs138856611	18	34801684	DTNA	t	g	846	0.264	+-	0.7918	0.96692
	White_Matter_Volume	Cross-Sectional	rs62097226	18	34804223	DTNA	a	t	846	-0.38	+-	0.7042	0.96692
	White_Matter_Volume	Cross-Sectional	rs4458079	18	34806161	DTNA	t	c	846	-0.2	--	0.8413	0.96692
	White_Matter_Volume	Cross-Sectional	rs8086358	18	34813672	DTNA	t	g	846	0.194	+-	0.8465	0.96692
	White_Matter_Volume	Cross-Sectional	rs72963047	18	34818804	DTNA	a	c	846	0.358	+-	0.7203	0.96692
	White_Matter_Volume	Cross-Sectional	rs17557660	18	34831178	DTNA	a	t	846	-1.132	--	0.2577	0.940226
	White_Matter_Volume	Cross-Sectional	rs1790533	18	34831631	DTNA	a	g	846	-0.568	+-	0.57	0.96692
	White_Matter_Volume	Cross-Sectional	rs4799782	18	34841123	DTNA	a	g	846	0.121	-+	0.9034	0.96692
	White_Matter_Volume	Cross-Sectional	rs1786604	18	34846264	DTNA	a	g	846	0.076	++	0.9398	0.987853
	White_Matter_Volume	Cross-Sectional	rs7233779	18	34863262	DTNA	a	g	846	-2.333	--	0.01964	0.538136
	White_Matter_Volume	Cross-Sectional	rs644982	18	34869793	DTNA	a	g	846	0.935	++	0.3495	0.940226
	White_Matter_Volume	Cross-Sectional	rs11659517	18	34870978	DTNA	a	t	846	-0.045	+-	0.9639	0.988012
	White_Matter_Volume	Cross-Sectional	rs524969	18	34872102	DTNA	a	t	846	0.218	-+	0.8272	0.96692
	White_Matter_Volume	Cross-Sectional	rs637914	18	34876135	DTNA	a	t	846	1.087	++	0.2768	0.940226
	White_Matter_Volume	Cross-Sectional	rs9304141	18	34879143	DTNA	t	c	846	-0.561	+-	0.5748	0.96692
	White_Matter_Volume	Cross-Sectional	rs2288085	18	34879740	DTNA	a	g	846	-1.647	--	0.0995	0.8083
	White_Matter_Volume	Cross-Sectional	rs17558116	18	34882719	DTNA	t	c	846	-0.284	+-	0.7766	0.96692
	White_Matter_Volume	Cross-Sectional	rs10502637	18	34890006	DTNA	t	c	846	-0.989	--	0.3229	0.940226
	White_Matter_Volume	Cross-Sectional	rs149163416	18	34898841	DTNA	a	g	846	-0.212	-+	0.8318	0.96692
	White_Matter_Volume	Cross-Sectional	20:33413780	20	33413780	SNTA1	a	t	846	-0.799	-+	0.4245	0.962914
	White_Matter_Volume	Cross-Sectional	rs291683	20	33431611	SNTA1	t	c	846	-0.725	-+	0.4687	0.96692
	White_Matter_Volume	Cross-Sectional	20:33433270	20	33433270	SNTA1	t	c	846	0.259	+-	0.7956	0.96692
	White_Matter_Volume	Cross-Sectional	rs6141396	20	33436147	SNTA1	a	c	328	1.141	+?	0.2539	0.940226
	White_Matter_Volume	Cross-Sectional	rs293721	20	33441633	SNTA1	t	c	846	-0.254	-+	0.7999	0.96692
	White_Matter_Volume	Longitudinal	rs111599092	3	49465346	DAG1	a	g	309	0.379	+-	0.705	0.952378
	White_Matter_Volume	Longitudinal	rs73073015	3	49465733	DAG1	a	g	309	-0.056	+-	0.9551	0.9756
	White_Matter_Volume	Longitudinal	rs7611164	3	49471395	DAG1	t	g	309	0.857	++	0.3914	0.952378
	White_Matter_Volume	Longitudinal	rs1568661	3	49483525	DAG1	a	g	309	-0.282	+-	0.7779	0.952378
	White_Matter_Volume	Longitudinal	rs7374731	3	49495661	DAG1	c	g	309	-0.359	+-	0.7195	0.952378
	White_Matter_Volume	Longitudinal	rs73074811	3	49516098	DAG1	a	t	309	0.781	-+	0.4349	0.952378
	White_Matter_Volume	Longitudinal	rs3870338	3	49519618	DAG1	a	g	309	-0.282	+-	0.7779	0.952378
	White_Matter_Volume	Longitudinal	rs55935606	3	49528072	DAG1	a	g	309	0.243	-+	0.8078	0.952378
	White_Matter_Volume	Longitudinal	rs75153130	3	49530436	DAG1	a	c	309	-0.857	--	0.3914	0.952378
	White_Matter_Volume	Longitudinal	rs13079082	3	49537375	DAG1	c	g	309	-0.385	-+	0.7002	0.952378
	White_Matter_Volume	Longitudinal	rs4052546	3	49538116	DAG1	c	g	309	0.359	-+	0.7195	0.952378
	White_Matter_Volume	Longitudinal	rs73074830	3	49539584	DAG1	a	c	309	-0.044	-+	0.9646	0.9756
	White_Matter_Volume	Longitudinal	rs114093899	3	49539955	DAG1	c	g	309	-0.628	--	0.5302	0.952378
	White_Matter_Volume	Longitudinal	rs9789109	18	26842291	AQP4	a	g	309	0.838	++	0.4021	0.952378
	White_Matter_Volume	Longitudinal	rs10164026	18	26842362	AQP4	a	c	309	0.409	-+	0.6824	0.952378
	White_Matter_Volume	Longitudinal	rs4800270	18	26844933	AQP4	t	g	309	-1.055	--	0.2914	0.952378
	White_Matter_Volume	Longitudinal	rs79668602	18	26845488	AQP4	a	g	309	-0.276	-+	0.7824	0.952378
	White_Matter_Volume	Longitudinal	rs12458416	18	26847267	AQP4	c	g	309	0.398	-+	0.6907	0.952378
	White_Matter_Volume	Longitudinal	rs12953446	18	26848521	AQP4	a	g	309	0.487	+-	0.626	0.952378
	White_Matter_Volume	Longitudinal	rs67461489	18	26848876	AQP4	t	c	309	-0.268	+-	0.7888	0.952378
	White_Matter_Volume	Longitudinal	rs11661081	18	26850068	AQP4	a	c	309	-0.878	-+	0.3799	0.952378
	White_Matter_Volume	Longitudinal	rs3763043	18	26855854	AQP4	t	c	309	-1.116	--	0.2645	0.952378
	White_Matter_Volume	Longitudinal	rs68006382	18	26856555	AQP4	a	g	309	0.574	+-	0.5658	0.952378
	White_Matter_Volume	Longitudinal	rs335930	18	26856961	AQP4	a	c	309	0.031	-+	0.9756	0.9756
	White_Matter_Volume	Longitudinal	rs71353405	18	26857429	AQP4	t	c	309	1.629	-+	0.1033	0.952378
	White_Matter_Volume	Longitudinal	rs162009	18	26864250	AQP4	a	g	309	0.966	++	0.3343	0.952378
	White_Matter_Volume	Longitudinal	rs4800773	18	26865017	AQP4	a	g	309	0.345	++	0.7299	0.952378
	White_Matter_Volume	Longitudinal	rs3875089	18	26865469	AQP4	t	c	309	0.429	+-	0.6679	0.952378
	White_Matter_Volume	Longitudinal	rs72878787	18	26866517	AQP4	a	g	309	0.861	+-	0.3892	0.952378
	White_Matter_Volume	Longitudinal	rs162006	18	26866570	AQP4	t	c	309	-0.977	--	0.3286	0.952378
	White_Matter_Volume	Longitudinal	rs151244	18	26866755	AQP4	t	c	309	1.417	++	0.1564	0.952378
	White_Matter_Volume	Longitudinal	rs72878794	18	26866839	AQP4	t	c	309	0.778	-+	0.4366	0.952378
	White_Matter_Volume	Longitudinal	rs9961118	18	26866901	AQP4	t	c	309	1.186	++	0.2357	0.952378
	White_Matter_Volume	Longitudinal	rs162004	18	26867972	AQP4	c	g	309	-0.268	-+	0.7888	0.952378
	White_Matter_Volume	Longitudinal	rs72878799	18	26868165	AQP4	a	g	309	-0.16	+-	0.8731	0.972477
	White_Matter_Volume	Longitudinal	rs11662318	18	26869056	AQP4	t	c	309	0.446	++	0.6557	0.952378
	White_Matter_Volume	Longitudinal	rs151246	18	26869139	AQP4	t	g	309	-0.212	-+	0.8322	0.952378
	White_Matter_Volume	Longitudinal	rs491148	18	26869803	AQP4	a	g	309	0.292	+-	0.7702	0.952378
	White_Matter_Volume	Longitudinal	rs162002	18	26871015	AQP4	a	g	309	0.191	+-	0.8482	0.960359
	White_Matter_Volume	Longitudinal	rs162001	18	26871481	AQP4	a	c	309	-0.47	+-	0.6385	0.952378
	White_Matter_Volume	Longitudinal	rs3865411	18	26871684	AQP4	a	g	309	-0.071	+-	0.9434	0.9756
	White_Matter_Volume	Longitudinal	rs162000	18	26872471	AQP4	a	c	309	1.587	+-	0.1124	0.952378
	White_Matter_Volume	Longitudinal	rs12969503	18	26873564	AQP4	t	g	309	0.353	+-	0.7239	0.952378
	White_Matter_Volume	Longitudinal	rs8094228	18	26873767	AQP4	t	c	309	0.363	++	0.7163	0.952378
	White_Matter_Volume	Longitudinal	rs480647	18	26874290	AQP4	t	c	309	-0.777	--	0.4374	0.952378
	White_Matter_Volume	Longitudinal	rs10502478	18	26874616	AQP4	a	c	309	0.656	+-	0.5121	0.952378
	White_Matter_Volume	Longitudinal	rs7234562	18	34483685	DTNA	t	c	309	0.903	++	0.3663	0.952378
	White_Matter_Volume	Longitudinal	rs79922046	18	34485536	DTNA	a	g	309	0.818	+-	0.4135	0.952378
	White_Matter_Volume	Longitudinal	rs9955950	18	34485672	DTNA	t	c	309	-1.039	--	0.2987	0.952378
	White_Matter_Volume	Longitudinal	rs12957028	18	34485948	DTNA	a	g	309	-1.25	--	0.2112	0.952378
	White_Matter_Volume	Longitudinal	rs72639491	18	34491438	DTNA	a	g	309	-0.106	-+	0.9154	0.9756
	White_Matter_Volume	Longitudinal	rs62097347	18	34492032	DTNA	c	g	309	0.9	++	0.3684	0.952378
	White_Matter_Volume	Longitudinal	rs9961251	18	34492344	DTNA	t	c	309	0.784	++	0.4328	0.952378
	White_Matter_Volume	Longitudinal	rs111846993	18	34494001	DTNA	t	c	309	-0.563	-+	0.5737	0.952378
	White_Matter_Volume	Longitudinal	rs4799769	18	34494577	DTNA	c	g	309	0.059	-+	0.9533	0.9756
	White_Matter_Volume	Longitudinal	rs8092794	18	34496273	DTNA	a	g	309	-0.707	--	0.4796	0.952378
	White_Matter_Volume	Longitudinal	rs7243528	18	34497055	DTNA	t	c	309	1.577	++	0.1148	0.952378
	White_Matter_Volume	Longitudinal	rs79972565	18	34497194	DTNA	t	g	309	1.737	++	0.08234	0.952378
	White_Matter_Volume	Longitudinal	rs35839923	18	34497764	DTNA	a	g	309	1.049	-+	0.294	0.952378
	White_Matter_Volume	Longitudinal	rs62097349	18	34499519	DTNA	a	g	309	1.328	++	0.1841	0.952378
	White_Matter_Volume	Longitudinal	rs9965622	18	34502153	DTNA	t	c	309	0.044	-+	0.9652	0.9756
	White_Matter_Volume	Longitudinal	rs62098462	18	34504364	DTNA	t	c	309	0.72	++	0.4715	0.952378
	White_Matter_Volume	Longitudinal	rs75127284	18	34506592	DTNA	a	c	309	-1.598	--	0.11	0.952378
	White_Matter_Volume	Longitudinal	rs2439861	18	34507940	DTNA	a	g	309	1.526	++	0.1271	0.952378
	White_Matter_Volume	Longitudinal	rs35982920	18	34516411	DTNA	a	g	309	-0.716	+-	0.4741	0.952378
	White_Matter_Volume	Longitudinal	rs2509597	18	34528430	DTNA	a	t	309	-0.979	+-	0.3278	0.952378
	White_Matter_Volume	Longitudinal	rs71363449	18	34531997	DTNA	t	c	309	0.539	++	0.5898	0.952378
	White_Matter_Volume	Longitudinal	rs2439853	18	34533937	DTNA	a	g	309	-0.227	-+	0.8204	0.952378
	White_Matter_Volume	Longitudinal	rs2439000	18	34536414	DTNA	c	g	309	0.997	+-	0.3186	0.952378
	White_Matter_Volume	Longitudinal	rs11875892	18	34544032	DTNA	a	g	309	-1.204	--	0.2287	0.952378
	White_Matter_Volume	Longitudinal	rs1967583	18	34544573	DTNA	t	c	309	-0.711	--	0.4774	0.952378
	White_Matter_Volume	Longitudinal	rs28856895	18	34555507	DTNA	a	g	309	1.125	++	0.2605	0.952378
	White_Matter_Volume	Longitudinal	rs77973497	18	34560529	DTNA	a	c	309	0.432	-+	0.6659	0.952378
	White_Matter_Volume	Longitudinal	rs2579796	18	34569243	DTNA	a	g	309	-0.71	-+	0.4776	0.952378
	White_Matter_Volume	Longitudinal	rs2579797	18	34571732	DTNA	t	g	309	-1.264	-+	0.2063	0.952378
	White_Matter_Volume	Longitudinal	rs2685557	18	34576782	DTNA	t	c	309	-0.657	-+	0.511	0.952378
	White_Matter_Volume	Longitudinal	rs9958492	18	34577783	DTNA	t	c	309	0.341	++	0.7332	0.952378
	White_Matter_Volume	Longitudinal	rs2579802	18	34579787	DTNA	a	c	309	-1.125	-+	0.2605	0.952378
	White_Matter_Volume	Longitudinal	rs74920018	18	34607557	DTNA	a	t	309	0.43	++	0.6672	0.952378
	White_Matter_Volume	Longitudinal	rs1439127	18	34607759	DTNA	a	t	309	-0.962	+-	0.3363	0.952378
	White_Matter_Volume	Longitudinal	rs12327368	18	34611361	DTNA	a	g	309	0.082	++	0.9348	0.9756
	White_Matter_Volume	Longitudinal	rs62097188	18	34611412	DTNA	a	g	309	0.219	+-	0.827	0.952378
	White_Matter_Volume	Longitudinal	rs9807153	18	34635520	DTNA	a	t	309	-0.371	+-	0.7107	0.952378
	White_Matter_Volume	Longitudinal	rs2730126	18	34635939	DTNA	a	c	309	-0.814	-+	0.4156	0.952378
	White_Matter_Volume	Longitudinal	rs1659526	18	34644451	DTNA	a	g	309	-1.321	--	0.1864	0.952378
	White_Matter_Volume	Longitudinal	rs17642885	18	34649976	DTNA	t	c	309	0.862	++	0.3887	0.952378
	White_Matter_Volume	Longitudinal	rs1240974	18	34650949	DTNA	t	c	309	-0.602	-+	0.5474	0.952378
	White_Matter_Volume	Longitudinal	rs55869511	18	34651262	DTNA	a	c	309	-0.052	+-	0.9582	0.9756
	White_Matter_Volume	Longitudinal	rs12955208	18	34656737	DTNA	a	g	309	-0.748	--	0.4544	0.952378
	White_Matter_Volume	Longitudinal	rs72953203	18	34660068	DTNA	a	g	309	-0.4	-+	0.6889	0.952378
	White_Matter_Volume	Longitudinal	rs9946070	18	34665505	DTNA	a	g	309	0.766	-+	0.4439	0.952378
	White_Matter_Volume	Longitudinal	rs72953211	18	34673381	DTNA	a	c	309	-0.693	+-	0.4885	0.952378
	White_Matter_Volume	Longitudinal	rs55971592	18	34697328	DTNA	a	g	309	1.477	++	0.1396	0.952378
	White_Matter_Volume	Longitudinal	rs78837792	18	34703359	DTNA	t	c	309	1.251	++	0.2108	0.952378
	White_Matter_Volume	Longitudinal	rs11663468	18	34707936	DTNA	t	c	309	-0.251	-+	0.8016	0.952378
	White_Matter_Volume	Longitudinal	rs12963825	18	34709484	DTNA	a	g	309	1.177	++	0.2393	0.952378
	White_Matter_Volume	Longitudinal	rs1480432	18	34727166	DTNA	t	g	309	-0.518	-+	0.6042	0.952378
	White_Matter_Volume	Longitudinal	rs45556134	18	34729425	DTNA	a	g	309	-1.081	--	0.2796	0.952378
	White_Matter_Volume	Longitudinal	rs899828	18	34732688	DTNA	t	g	309	1.459	++	0.1445	0.952378
	White_Matter_Volume	Longitudinal	rs17556884	18	34736455	DTNA	t	c	309	-0.362	+-	0.7175	0.952378
	White_Matter_Volume	Longitudinal	rs1480428	18	34738732	DTNA	a	g	309	-0.046	+-	0.9633	0.9756
	White_Matter_Volume	Longitudinal	rs12957349	18	34739291	DTNA	t	c	309	-0.789	--	0.4302	0.952378
	White_Matter_Volume	Longitudinal	rs12608110	18	34752198	DTNA	a	g	309	1.462	++	0.1437	0.952378
	White_Matter_Volume	Longitudinal	rs7228547	18	34760039	DTNA	a	g	309	0.209	+-	0.8342	0.952378
	White_Matter_Volume	Longitudinal	rs8099437	18	34761448	DTNA	t	g	309	-0.046	+-	0.9633	0.9756
	White_Matter_Volume	Longitudinal	rs72955132	18	34762382	DTNA	a	g	309	0.093	+-	0.9256	0.9756
	White_Matter_Volume	Longitudinal	rs1817452	18	34776629	DTNA	t	c	309	-0.341	+-	0.7328	0.952378
	White_Matter_Volume	Longitudinal	rs56404226	18	34778060	DTNA	a	g	309	-1.337	--	0.1812	0.952378
	White_Matter_Volume	Longitudinal	rs72955175	18	34779045	DTNA	a	t	309	0.308	+-	0.7577	0.952378
	White_Matter_Volume	Longitudinal	rs12608251	18	34782906	DTNA	t	g	309	-0.864	--	0.3877	0.952378
	White_Matter_Volume	Longitudinal	rs76880720	18	34791141	DTNA	a	c	309	0.388	-+	0.6978	0.952378
	White_Matter_Volume	Longitudinal	rs9989533	18	34793909	DTNA	t	c	309	0.485	+-	0.6279	0.952378
	White_Matter_Volume	Longitudinal	rs79500711	18	34794379	DTNA	a	g	309	0.225	++	0.8221	0.952378
	White_Matter_Volume	Longitudinal	rs138856611	18	34801684	DTNA	t	g	309	-0.553	--	0.5804	0.952378
	White_Matter_Volume	Longitudinal	rs62097226	18	34804223	DTNA	a	t	309	-1.231	--	0.2184	0.952378
	White_Matter_Volume	Longitudinal	rs4458079	18	34806161	DTNA	t	c	309	0.412	-+	0.6806	0.952378
	White_Matter_Volume	Longitudinal	rs8086358	18	34813672	DTNA	t	g	309	-0.488	--	0.6255	0.952378
	White_Matter_Volume	Longitudinal	rs72963047	18	34818804	DTNA	a	c	309	0.866	++	0.3864	0.952378
	White_Matter_Volume	Longitudinal	rs17557660	18	34831178	DTNA	a	t	309	0.362	+-	0.7173	0.952378
	White_Matter_Volume	Longitudinal	rs1790533	18	34831631	DTNA	a	g	309	-0.73	--	0.4651	0.952378
	White_Matter_Volume	Longitudinal	rs4799782	18	34841123	DTNA	a	g	309	0.563	++	0.5736	0.952378
	White_Matter_Volume	Longitudinal	rs1786604	18	34846264	DTNA	a	g	309	0.282	+-	0.7782	0.952378
	White_Matter_Volume	Longitudinal	rs7233779	18	34863262	DTNA	a	g	309	1.263	++	0.2065	0.952378
	White_Matter_Volume	Longitudinal	rs644982	18	34869793	DTNA	a	g	309	-0.256	-+	0.7979	0.952378
	White_Matter_Volume	Longitudinal	rs11659517	18	34870978	DTNA	a	t	309	-0.16	+-	0.8727	0.972477
	White_Matter_Volume	Longitudinal	rs524969	18	34872102	DTNA	a	t	309	0.508	+-	0.6112	0.952378
	White_Matter_Volume	Longitudinal	rs637914	18	34876135	DTNA	a	t	309	0.116	+-	0.9077	0.9756
	White_Matter_Volume	Longitudinal	rs9304141	18	34879143	DTNA	t	c	309	0.362	+-	0.7174	0.952378
	White_Matter_Volume	Longitudinal	rs2288085	18	34879740	DTNA	a	g	309	0.611	++	0.541	0.952378
	White_Matter_Volume	Longitudinal	rs17558116	18	34882719	DTNA	t	c	309	-0.039	+-	0.9692	0.9756
	White_Matter_Volume	Longitudinal	rs10502637	18	34890006	DTNA	t	c	309	0.55	++	0.5824	0.952378
	White_Matter_Volume	Longitudinal	rs149163416	18	34898841	DTNA	a	g	309	0.583	-+	0.5598	0.952378
	White_Matter_Volume	Longitudinal	20:33413780	20	33413780	SNTA1	a	t	309	-1.345	--	0.1785	0.952378
	White_Matter_Volume	Longitudinal	rs291683	20	33431611	SNTA1	t	c	309	1.178	++	0.2387	0.952378
	White_Matter_Volume	Longitudinal	20:33433270	20	33433270	SNTA1	t	c	309	-1.156	--	0.2479	0.952378
	White_Matter_Volume	Longitudinal	rs6141396	20	33436147	SNTA1	a	c	169	-0.655	-?	0.5127	0.952378
	White_Matter_Volume	Longitudinal	rs293721	20	33441633	SNTA1	t	c	309	0.852	-+	0.3943	0.952378

## Sheet: Table S4
Supplementary Table 4: Meta-Analysis of linear regression results in Aβ+ participants (recessive genetic model)
	Outcome	Model	SNP	CHROM	POS	Gene_Symbol	Allele1	Allele2	Weight	Zscore	Direction	P	FDR_P
	Centiloid	Cross-Sectional	rs111599092	3	49465346	DAG1	a	g	973	-0.368	--	0.7129	0.9978
	Centiloid	Cross-Sectional	rs73073015	3	49465733	DAG1	a	g	973	1.685	++	0.09199	0.976353
	Centiloid	Cross-Sectional	rs7611164	3	49471395	DAG1	t	g	973	-0.344	-+	0.731	0.9978
	Centiloid	Cross-Sectional	rs1568661	3	49483525	DAG1	a	g	973	-0.07	-+	0.9443	0.9978
	Centiloid	Cross-Sectional	rs7374731	3	49495661	DAG1	c	g	973	0.993	+-	0.3207	0.976353
	Centiloid	Cross-Sectional	rs73074811	3	49516098	DAG1	a	t	973	-1.048	--	0.2945	0.976353
	Centiloid	Cross-Sectional	rs3870338	3	49519618	DAG1	a	g	973	-0.003	-+	0.9978	0.9978
	Centiloid	Cross-Sectional	rs55935606	3	49528072	DAG1	a	g	973	-0.411	--	0.6814	0.9978
	Centiloid	Cross-Sectional	rs75153130	3	49530436	DAG1	a	c	973	0.344	+-	0.731	0.9978
	Centiloid	Cross-Sectional	rs13079082	3	49537375	DAG1	c	g	973	-0.527	+-	0.5979	0.9978
	Centiloid	Cross-Sectional	rs4052546	3	49538116	DAG1	c	g	973	-0.993	-+	0.3207	0.976353
	Centiloid	Cross-Sectional	rs73074830	3	49539584	DAG1	a	c	973	1.028	++	0.3038	0.976353
	Centiloid	Cross-Sectional	rs114093899	3	49539955	DAG1	c	g	569	-1.192	?-	0.2333	0.976353
	Centiloid	Cross-Sectional	rs9789109	18	26842291	AQP4	a	g	973	-0.787	--	0.4314	0.9978
	Centiloid	Cross-Sectional	rs10164026	18	26842362	AQP4	a	c	973	-1.278	+-	0.2013	0.976353
	Centiloid	Cross-Sectional	rs4800270	18	26844933	AQP4	t	g	973	0.27	-+	0.7875	0.9978
	Centiloid	Cross-Sectional	rs79668602	18	26845488	AQP4	a	g	973	0.751	++	0.4526	0.9978
	Centiloid	Cross-Sectional	rs12458416	18	26847267	AQP4	c	g	973	-1.616	--	0.1062	0.976353
	Centiloid	Cross-Sectional	rs12953446	18	26848521	AQP4	a	g	973	1.056	-+	0.291	0.976353
	Centiloid	Cross-Sectional	rs67461489	18	26848876	AQP4	t	c	973	1.022	+-	0.3069	0.976353
	Centiloid	Cross-Sectional	rs11661081	18	26850068	AQP4	a	c	973	0.049	+-	0.9608	0.9978
	Centiloid	Cross-Sectional	rs3763043	18	26855854	AQP4	t	c	973	1.402	++	0.1609	0.976353
	Centiloid	Cross-Sectional	rs68006382	18	26856555	AQP4	a	g	973	0.228	-+	0.8199	0.9978
	Centiloid	Cross-Sectional	rs335930	18	26856961	AQP4	a	c	973	0.628	+-	0.5297	0.9978
	Centiloid	Cross-Sectional	rs71353405	18	26857429	AQP4	t	c	973	-1.324	--	0.1855	0.976353
	Centiloid	Cross-Sectional	rs162009	18	26864250	AQP4	a	g	973	-1.217	--	0.2234	0.976353
	Centiloid	Cross-Sectional	rs4800773	18	26865017	AQP4	a	g	973	-0.319	+-	0.7501	0.9978
	Centiloid	Cross-Sectional	rs3875089	18	26865469	AQP4	t	c	973	0.995	+-	0.3197	0.976353
	Centiloid	Cross-Sectional	rs72878787	18	26866517	AQP4	a	g	973	0.254	-+	0.7996	0.9978
	Centiloid	Cross-Sectional	rs162006	18	26866570	AQP4	t	c	973	0.55	-+	0.5825	0.9978
	Centiloid	Cross-Sectional	rs151244	18	26866755	AQP4	t	c	973	0.293	+-	0.7696	0.9978
	Centiloid	Cross-Sectional	rs72878794	18	26866839	AQP4	t	c	973	-1.753	--	0.07954	0.976353
	Centiloid	Cross-Sectional	rs9961118	18	26866901	AQP4	t	c	973	0.454	++	0.6498	0.9978
	Centiloid	Cross-Sectional	rs162004	18	26867972	AQP4	c	g	973	-0.522	-+	0.6015	0.9978
	Centiloid	Cross-Sectional	rs72878799	18	26868165	AQP4	a	g	973	0.369	-+	0.7122	0.9978
	Centiloid	Cross-Sectional	rs11662318	18	26869056	AQP4	t	c	973	-0.802	--	0.4224	0.9978
	Centiloid	Cross-Sectional	rs151246	18	26869139	AQP4	t	g	973	-0.958	--	0.338	0.9978
	Centiloid	Cross-Sectional	rs491148	18	26869803	AQP4	a	g	973	0.055	+-	0.9559	0.9978
	Centiloid	Cross-Sectional	rs162002	18	26871015	AQP4	a	g	973	0.904	++	0.3658	0.9978
	Centiloid	Cross-Sectional	rs162001	18	26871481	AQP4	a	c	973	0.179	+-	0.8579	0.9978
	Centiloid	Cross-Sectional	rs3865411	18	26871684	AQP4	a	g	973	-1.623	+-	0.1046	0.976353
	Centiloid	Cross-Sectional	rs162000	18	26872471	AQP4	a	c	973	-0.557	+-	0.5776	0.9978
	Centiloid	Cross-Sectional	rs12969503	18	26873564	AQP4	t	g	973	0.708	++	0.4792	0.9978
	Centiloid	Cross-Sectional	rs8094228	18	26873767	AQP4	t	c	973	-0.791	--	0.4292	0.9978
	Centiloid	Cross-Sectional	rs480647	18	26874290	AQP4	t	c	973	0.045	-+	0.9644	0.9978
	Centiloid	Cross-Sectional	rs10502478	18	26874616	AQP4	a	c	404	1.448	+?	0.1477	0.976353
	Centiloid	Cross-Sectional	rs7234562	18	34483685	DTNA	t	c	973	0.071	+-	0.9432	0.9978
	Centiloid	Cross-Sectional	rs79922046	18	34485536	DTNA	a	g	973	-0.078	+-	0.9374	0.9978
	Centiloid	Cross-Sectional	rs9955950	18	34485672	DTNA	t	c	973	0.178	+-	0.8589	0.9978
	Centiloid	Cross-Sectional	rs12957028	18	34485948	DTNA	a	g	973	0.148	-+	0.8822	0.9978
	Centiloid	Cross-Sectional	rs72639491	18	34491438	DTNA	a	g	973	-0.087	-+	0.9309	0.9978
	Centiloid	Cross-Sectional	rs62097347	18	34492032	DTNA	c	g	973	1.5	++	0.1335	0.976353
	Centiloid	Cross-Sectional	rs9961251	18	34492344	DTNA	t	c	973	-1.854	--	0.06373	0.976353
	Centiloid	Cross-Sectional	rs111846993	18	34494001	DTNA	t	c	973	-0.865	-+	0.3868	0.9978
	Centiloid	Cross-Sectional	rs4799769	18	34494577	DTNA	c	g	973	-1.047	--	0.2953	0.976353
	Centiloid	Cross-Sectional	rs8092794	18	34496273	DTNA	a	g	973	1.386	-+	0.1657	0.976353
	Centiloid	Cross-Sectional	rs7243528	18	34497055	DTNA	t	c	973	-1.313	--	0.1892	0.976353
	Centiloid	Cross-Sectional	rs79972565	18	34497194	DTNA	t	g	973	-0.875	--	0.3818	0.9978
	Centiloid	Cross-Sectional	rs35839923	18	34497764	DTNA	a	g	973	0.395	-+	0.6931	0.9978
	Centiloid	Cross-Sectional	rs62097349	18	34499519	DTNA	a	g	973	-1.635	--	0.102	0.976353
	Centiloid	Cross-Sectional	rs9965622	18	34502153	DTNA	t	c	973	-0.009	-+	0.9931	0.9978
	Centiloid	Cross-Sectional	rs62098462	18	34504364	DTNA	t	c	973	-1.289	--	0.1975	0.976353
	Centiloid	Cross-Sectional	rs75127284	18	34506592	DTNA	a	c	404	0.023	+?	0.9818	0.9978
	Centiloid	Cross-Sectional	rs2439861	18	34507940	DTNA	a	g	973	-1.321	--	0.1865	0.976353
	Centiloid	Cross-Sectional	rs35982920	18	34516411	DTNA	a	g	973	-0.399	+-	0.6902	0.9978
	Centiloid	Cross-Sectional	rs2509597	18	34528430	DTNA	a	t	973	1.969	++	0.04897	0.976353
	Centiloid	Cross-Sectional	rs71363449	18	34531997	DTNA	t	c	973	-0.115	-+	0.9081	0.9978
	Centiloid	Cross-Sectional	rs2439853	18	34533937	DTNA	a	g	973	0.006	-+	0.9955	0.9978
	Centiloid	Cross-Sectional	rs2439000	18	34536414	DTNA	c	g	973	-0.476	+-	0.6343	0.9978
	Centiloid	Cross-Sectional	rs11875892	18	34544032	DTNA	a	g	973	-0.009	+-	0.9926	0.9978
	Centiloid	Cross-Sectional	rs1967583	18	34544573	DTNA	t	c	973	1.087	++	0.2768	0.976353
	Centiloid	Cross-Sectional	rs28856895	18	34555507	DTNA	a	g	973	0.209	-+	0.8341	0.9978
	Centiloid	Cross-Sectional	rs77973497	18	34560529	DTNA	a	c	973	-1.074	-+	0.2829	0.976353
	Centiloid	Cross-Sectional	rs2579796	18	34569243	DTNA	a	g	973	-0.125	-+	0.9004	0.9978
	Centiloid	Cross-Sectional	rs2579797	18	34571732	DTNA	t	g	973	1.007	++	0.3142	0.976353
	Centiloid	Cross-Sectional	rs2685557	18	34576782	DTNA	t	c	973	-0.203	-+	0.8395	0.9978
	Centiloid	Cross-Sectional	rs9958492	18	34577783	DTNA	t	c	973	-0.214	-+	0.8307	0.9978
	Centiloid	Cross-Sectional	rs2579802	18	34579787	DTNA	a	c	973	0.438	-+	0.6615	0.9978
	Centiloid	Cross-Sectional	rs74920018	18	34607557	DTNA	a	t	973	-1.074	-+	0.2829	0.976353
	Centiloid	Cross-Sectional	rs1439127	18	34607759	DTNA	a	t	973	0.148	-+	0.8825	0.9978
	Centiloid	Cross-Sectional	rs12327368	18	34611361	DTNA	a	g	973	-0.214	-+	0.8307	0.9978
	Centiloid	Cross-Sectional	rs62097188	18	34611412	DTNA	a	g	973	-1.171	--	0.2414	0.976353
	Centiloid	Cross-Sectional	rs9807153	18	34635520	DTNA	a	t	973	0.883	++	0.3775	0.9978
	Centiloid	Cross-Sectional	rs2730126	18	34635939	DTNA	a	c	973	0.318	-+	0.7507	0.9978
	Centiloid	Cross-Sectional	rs1659526	18	34644451	DTNA	a	g	973	0.721	++	0.4711	0.9978
	Centiloid	Cross-Sectional	rs17642885	18	34649976	DTNA	t	c	973	-1.149	--	0.2505	0.976353
	Centiloid	Cross-Sectional	rs1240974	18	34650949	DTNA	t	c	973	1.007	++	0.3142	0.976353
	Centiloid	Cross-Sectional	rs55869511	18	34651262	DTNA	a	c	973	-0.321	--	0.748	0.9978
	Centiloid	Cross-Sectional	rs12955208	18	34656737	DTNA	a	g	973	-0.03	+-	0.9758	0.9978
	Centiloid	Cross-Sectional	rs72953203	18	34660068	DTNA	a	g	973	0.047	+-	0.9625	0.9978
	Centiloid	Cross-Sectional	rs9946070	18	34665505	DTNA	a	g	973	0.392	-+	0.6953	0.9978
	Centiloid	Cross-Sectional	rs72953211	18	34673381	DTNA	a	c	973	-0.407	+-	0.684	0.9978
	Centiloid	Cross-Sectional	rs55971592	18	34697328	DTNA	a	g	973	1.834	++	0.06664	0.976353
	Centiloid	Cross-Sectional	rs78837792	18	34703359	DTNA	t	c	973	-0.463	-+	0.6432	0.9978
	Centiloid	Cross-Sectional	rs11663468	18	34707936	DTNA	t	c	973	0.045	-+	0.964	0.9978
	Centiloid	Cross-Sectional	rs12963825	18	34709484	DTNA	a	g	973	0.487	-+	0.6259	0.9978
	Centiloid	Cross-Sectional	rs1480432	18	34727166	DTNA	t	g	973	-2.296	--	0.02167	0.976353
	Centiloid	Cross-Sectional	rs45556134	18	34729425	DTNA	a	g	973	-0.84	-+	0.401	0.9978
	Centiloid	Cross-Sectional	rs899828	18	34732688	DTNA	t	g	973	1.108	++	0.2679	0.976353
	Centiloid	Cross-Sectional	rs17556884	18	34736455	DTNA	t	c	973	-0.497	+-	0.619	0.9978
	Centiloid	Cross-Sectional	rs1480428	18	34738732	DTNA	a	g	973	0.047	+-	0.9626	0.9978
	Centiloid	Cross-Sectional	rs12957349	18	34739291	DTNA	t	c	973	-1.717	--	0.08602	0.976353
	Centiloid	Cross-Sectional	rs12608110	18	34752198	DTNA	a	g	973	1.131	++	0.2581	0.976353
	Centiloid	Cross-Sectional	rs7228547	18	34760039	DTNA	a	g	973	-0.045	+-	0.964	0.9978
	Centiloid	Cross-Sectional	rs8099437	18	34761448	DTNA	t	g	973	0.075	+-	0.94	0.9978
	Centiloid	Cross-Sectional	rs72955132	18	34762382	DTNA	a	g	973	-0.364	+-	0.7157	0.9978
	Centiloid	Cross-Sectional	rs1817452	18	34776629	DTNA	t	c	973	-1.514	--	0.1301	0.976353
	Centiloid	Cross-Sectional	rs56404226	18	34778060	DTNA	a	g	973	-0.273	-+	0.785	0.9978
	Centiloid	Cross-Sectional	rs72955175	18	34779045	DTNA	a	t	973	-0.045	+-	0.964	0.9978
	Centiloid	Cross-Sectional	rs12608251	18	34782906	DTNA	t	g	973	-2.046	--	0.04071	0.976353
	Centiloid	Cross-Sectional	rs76880720	18	34791141	DTNA	a	c	973	1.566	++	0.1174	0.976353
	Centiloid	Cross-Sectional	rs9989533	18	34793909	DTNA	t	c	973	-0.188	-+	0.8508	0.9978
	Centiloid	Cross-Sectional	rs79500711	18	34794379	DTNA	a	g	973	-0.794	+-	0.4274	0.9978
	Centiloid	Cross-Sectional	rs138856611	18	34801684	DTNA	t	g	973	0.567	-+	0.5706	0.9978
	Centiloid	Cross-Sectional	rs62097226	18	34804223	DTNA	a	t	404	-0.019	-?	0.9848	0.9978
	Centiloid	Cross-Sectional	rs4458079	18	34806161	DTNA	t	c	973	0.697	+-	0.4861	0.9978
	Centiloid	Cross-Sectional	rs8086358	18	34813672	DTNA	t	g	973	1.181	++	0.2376	0.976353
	Centiloid	Cross-Sectional	rs72963047	18	34818804	DTNA	a	c	973	0.905	-+	0.3652	0.9978
	Centiloid	Cross-Sectional	rs17557660	18	34831178	DTNA	a	t	973	0.151	+-	0.88	0.9978
	Centiloid	Cross-Sectional	rs1790533	18	34831631	DTNA	a	g	973	-1.648	--	0.0994	0.976353
	Centiloid	Cross-Sectional	rs4799782	18	34841123	DTNA	a	g	973	-0.567	+-	0.5706	0.9978
	Centiloid	Cross-Sectional	rs1786604	18	34846264	DTNA	a	g	973	0.074	+-	0.941	0.9978
	Centiloid	Cross-Sectional	rs7233779	18	34863262	DTNA	a	g	973	-0.202	-+	0.84	0.9978
	Centiloid	Cross-Sectional	rs644982	18	34869793	DTNA	a	g	973	0.379	-+	0.7044	0.9978
	Centiloid	Cross-Sectional	rs11659517	18	34870978	DTNA	a	t	973	-1.444	--	0.1489	0.976353
	Centiloid	Cross-Sectional	rs524969	18	34872102	DTNA	a	t	973	0.943	++	0.3458	0.9978
	Centiloid	Cross-Sectional	rs637914	18	34876135	DTNA	a	t	973	-0.274	--	0.7844	0.9978
	Centiloid	Cross-Sectional	rs9304141	18	34879143	DTNA	t	c	973	0.416	+-	0.6775	0.9978
	Centiloid	Cross-Sectional	rs2288085	18	34879740	DTNA	a	g	973	0.249	++	0.8034	0.9978
	Centiloid	Cross-Sectional	rs17558116	18	34882719	DTNA	t	c	973	0.483	-+	0.6289	0.9978
	Centiloid	Cross-Sectional	rs10502637	18	34890006	DTNA	t	c	973	1.123	++	0.2616	0.976353
	Centiloid	Cross-Sectional	rs149163416	18	34898841	DTNA	a	g	973	-0.354	+-	0.7231	0.9978
	Centiloid	Cross-Sectional	20:33413780	20	33413780	SNTA1	a	t	973	0.027	+-	0.9785	0.9978
	Centiloid	Cross-Sectional	rs291683	20	33431611	SNTA1	t	c	973	0.215	-+	0.8298	0.9978
	Centiloid	Cross-Sectional	20:33433270	20	33433270	SNTA1	t	c	973	-0.123	+-	0.9018	0.9978
	Centiloid	Cross-Sectional	rs6141396	20	33436147	SNTA1	a	c	404	0.443	+?	0.6576	0.9978
	Centiloid	Cross-Sectional	rs293721	20	33441633	SNTA1	t	c	973	-0.077	-+	0.9384	0.9978
	Centiloid	Longitudinal	rs111599092	3	49465346	DAG1	a	g	780	1.157	-+	0.2472	0.778517
	Centiloid	Longitudinal	rs73073015	3	49465733	DAG1	a	g	780	-0.648	-+	0.5172	0.88984
	Centiloid	Longitudinal	rs7611164	3	49471395	DAG1	t	g	780	-1.297	--	0.1946	0.772014
	Centiloid	Longitudinal	rs1568661	3	49483525	DAG1	a	g	780	1.403	++	0.1607	0.76035
	Centiloid	Longitudinal	rs7374731	3	49495661	DAG1	c	g	780	1.13	++	0.2586	0.778517
	Centiloid	Longitudinal	rs73074811	3	49516098	DAG1	a	t	780	-1.674	--	0.09411	0.76035
	Centiloid	Longitudinal	rs3870338	3	49519618	DAG1	a	g	780	1.323	++	0.186	0.772014
	Centiloid	Longitudinal	rs55935606	3	49528072	DAG1	a	g	780	-2.033	--	0.04203	0.76035
	Centiloid	Longitudinal	rs75153130	3	49530436	DAG1	a	c	780	1.297	++	0.1946	0.772014
	Centiloid	Longitudinal	rs13079082	3	49537375	DAG1	c	g	780	-0.682	+-	0.4956	0.88984
	Centiloid	Longitudinal	rs4052546	3	49538116	DAG1	c	g	780	-1.13	--	0.2586	0.778517
	Centiloid	Longitudinal	rs73074830	3	49539584	DAG1	a	c	780	-0.383	+-	0.7016	0.92582
	Centiloid	Longitudinal	rs114093899	3	49539955	DAG1	c	g	434	-1.161	?-	0.2455	0.778517
	Centiloid	Longitudinal	rs9789109	18	26842291	AQP4	a	g	780	-0.295	+-	0.7682	0.92582
	Centiloid	Longitudinal	rs10164026	18	26842362	AQP4	a	c	780	0.614	-+	0.5391	0.88984
	Centiloid	Longitudinal	rs4800270	18	26844933	AQP4	t	g	780	0.125	+-	0.9003	0.934402
	Centiloid	Longitudinal	rs79668602	18	26845488	AQP4	a	g	780	0.047	+-	0.9622	0.974513
	Centiloid	Longitudinal	rs12458416	18	26847267	AQP4	c	g	780	1.289	++	0.1974	0.772014
	Centiloid	Longitudinal	rs12953446	18	26848521	AQP4	a	g	780	-0.238	-+	0.8118	0.92582
	Centiloid	Longitudinal	rs67461489	18	26848876	AQP4	t	c	780	-1.498	--	0.1341	0.76035
	Centiloid	Longitudinal	rs11661081	18	26850068	AQP4	a	c	780	1.676	++	0.09382	0.76035
	Centiloid	Longitudinal	rs3763043	18	26855854	AQP4	t	c	780	0.181	+-	0.8563	0.92582
	Centiloid	Longitudinal	rs68006382	18	26856555	AQP4	a	g	780	-1.123	-+	0.2614	0.778517
	Centiloid	Longitudinal	rs335930	18	26856961	AQP4	a	c	780	0.725	++	0.4682	0.880366
	Centiloid	Longitudinal	rs71353405	18	26857429	AQP4	t	c	780	-0.041	+-	0.9674	0.974513
	Centiloid	Longitudinal	rs162009	18	26864250	AQP4	a	g	780	1.036	++	0.3002	0.790912
	Centiloid	Longitudinal	rs4800773	18	26865017	AQP4	a	g	780	-0.192	-+	0.8478	0.92582
	Centiloid	Longitudinal	rs3875089	18	26865469	AQP4	t	c	780	-1.647	--	0.09952	0.76035
	Centiloid	Longitudinal	rs72878787	18	26866517	AQP4	a	g	780	-0.785	--	0.4323	0.846073
	Centiloid	Longitudinal	rs162006	18	26866570	AQP4	t	c	780	-0.541	+-	0.5888	0.907587
	Centiloid	Longitudinal	rs151244	18	26866755	AQP4	t	c	780	1.567	-+	0.1171	0.76035
	Centiloid	Longitudinal	rs72878794	18	26866839	AQP4	t	c	780	-0.378	--	0.7053	0.92582
	Centiloid	Longitudinal	rs9961118	18	26866901	AQP4	t	c	780	0.238	-+	0.8119	0.92582
	Centiloid	Longitudinal	rs162004	18	26867972	AQP4	c	g	780	-0.358	--	0.7207	0.92582
	Centiloid	Longitudinal	rs72878799	18	26868165	AQP4	a	g	780	-0.131	+-	0.8962	0.934402
	Centiloid	Longitudinal	rs11662318	18	26869056	AQP4	t	c	780	0.895	++	0.371	0.83386
	Centiloid	Longitudinal	rs151246	18	26869139	AQP4	t	g	780	0.17	-+	0.865	0.92582
	Centiloid	Longitudinal	rs491148	18	26869803	AQP4	a	g	780	-1.497	--	0.1344	0.76035
	Centiloid	Longitudinal	rs162002	18	26871015	AQP4	a	g	780	-0.24	--	0.8102	0.92582
	Centiloid	Longitudinal	rs162001	18	26871481	AQP4	a	c	780	-0.115	+-	0.9086	0.935926
	Centiloid	Longitudinal	rs3865411	18	26871684	AQP4	a	g	780	-0.218	+-	0.8275	0.92582
	Centiloid	Longitudinal	rs162000	18	26872471	AQP4	a	c	780	-1.038	--	0.2992	0.790912
	Centiloid	Longitudinal	rs12969503	18	26873564	AQP4	t	g	780	-0.359	--	0.7199	0.92582
	Centiloid	Longitudinal	rs8094228	18	26873767	AQP4	t	c	780	1.137	++	0.2556	0.778517
	Centiloid	Longitudinal	rs480647	18	26874290	AQP4	t	c	780	0.653	++	0.5139	0.88984
	Centiloid	Longitudinal	rs10502478	18	26874616	AQP4	a	c	346	-0.623	-?	0.5333	0.88984
	Centiloid	Longitudinal	rs7234562	18	34483685	DTNA	t	c	780	-0.539	-+	0.5896	0.907587
	Centiloid	Longitudinal	rs79922046	18	34485536	DTNA	a	g	780	-0.694	--	0.4876	0.88984
	Centiloid	Longitudinal	rs9955950	18	34485672	DTNA	t	c	780	-1.923	--	0.05447	0.76035
	Centiloid	Longitudinal	rs12957028	18	34485948	DTNA	a	g	780	0.828	++	0.4078	0.83386
	Centiloid	Longitudinal	rs72639491	18	34491438	DTNA	a	g	780	0.292	-+	0.7703	0.92582
	Centiloid	Longitudinal	rs62097347	18	34492032	DTNA	c	g	780	-0.308	-+	0.7578	0.92582
	Centiloid	Longitudinal	rs9961251	18	34492344	DTNA	t	c	780	0.94	++	0.3472	0.83386
	Centiloid	Longitudinal	rs111846993	18	34494001	DTNA	t	c	780	0.468	+-	0.6395	0.92582
	Centiloid	Longitudinal	rs4799769	18	34494577	DTNA	c	g	780	-0.253	+-	0.8004	0.92582
	Centiloid	Longitudinal	rs8092794	18	34496273	DTNA	a	g	780	0.456	-+	0.6484	0.92582
	Centiloid	Longitudinal	rs7243528	18	34497055	DTNA	t	c	780	0.513	+-	0.608	0.925511
	Centiloid	Longitudinal	rs79972565	18	34497194	DTNA	t	g	780	1.235	+-	0.2169	0.778517
	Centiloid	Longitudinal	rs35839923	18	34497764	DTNA	a	g	780	-2.068	--	0.03865	0.76035
	Centiloid	Longitudinal	rs62097349	18	34499519	DTNA	a	g	780	-0.724	+-	0.4691	0.880366
	Centiloid	Longitudinal	rs9965622	18	34502153	DTNA	t	c	780	-1.13	--	0.2587	0.778517
	Centiloid	Longitudinal	rs62098462	18	34504364	DTNA	t	c	780	-1.384	--	0.1665	0.76035
	Centiloid	Longitudinal	rs75127284	18	34506592	DTNA	a	c	346	-0.91	-?	0.3628	0.83386
	Centiloid	Longitudinal	rs2439861	18	34507940	DTNA	a	g	780	-0.618	--	0.5368	0.88984
	Centiloid	Longitudinal	rs35982920	18	34516411	DTNA	a	g	780	1.533	++	0.1252	0.76035
	Centiloid	Longitudinal	rs2509597	18	34528430	DTNA	a	t	780	0.376	-+	0.7067	0.92582
	Centiloid	Longitudinal	rs71363449	18	34531997	DTNA	t	c	780	-0.328	--	0.7432	0.92582
	Centiloid	Longitudinal	rs2439853	18	34533937	DTNA	a	g	780	-0.787	--	0.4312	0.846073
	Centiloid	Longitudinal	rs2439000	18	34536414	DTNA	c	g	780	-0.306	+-	0.7595	0.92582
	Centiloid	Longitudinal	rs11875892	18	34544032	DTNA	a	g	780	1.659	++	0.0972	0.76035
	Centiloid	Longitudinal	rs1967583	18	34544573	DTNA	t	c	780	0.235	+-	0.8143	0.92582
	Centiloid	Longitudinal	rs28856895	18	34555507	DTNA	a	g	780	0.372	+-	0.7099	0.92582
	Centiloid	Longitudinal	rs77973497	18	34560529	DTNA	a	c	780	-1.385	--	0.1659	0.76035
	Centiloid	Longitudinal	rs2579796	18	34569243	DTNA	a	g	780	-1.444	--	0.1486	0.76035
	Centiloid	Longitudinal	rs2579797	18	34571732	DTNA	t	g	780	0.306	-+	0.7595	0.92582
	Centiloid	Longitudinal	rs2685557	18	34576782	DTNA	t	c	780	-1.444	--	0.1486	0.76035
	Centiloid	Longitudinal	rs9958492	18	34577783	DTNA	t	c	780	-0.84	--	0.4008	0.83386
	Centiloid	Longitudinal	rs2579802	18	34579787	DTNA	a	c	780	1.087	++	0.2772	0.790912
	Centiloid	Longitudinal	rs74920018	18	34607557	DTNA	a	t	780	-1.385	--	0.1659	0.76035
	Centiloid	Longitudinal	rs1439127	18	34607759	DTNA	a	t	780	-0.152	+-	0.8793	0.928017
	Centiloid	Longitudinal	rs12327368	18	34611361	DTNA	a	g	780	-0.84	--	0.4008	0.83386
	Centiloid	Longitudinal	rs62097188	18	34611412	DTNA	a	g	780	1.071	-+	0.2844	0.790912
	Centiloid	Longitudinal	rs9807153	18	34635520	DTNA	a	t	780	-0.59	--	0.5555	0.901944
	Centiloid	Longitudinal	rs2730126	18	34635939	DTNA	a	c	780	0.15	++	0.8806	0.928017
	Centiloid	Longitudinal	rs1659526	18	34644451	DTNA	a	g	780	1.258	++	0.2085	0.772014
	Centiloid	Longitudinal	rs17642885	18	34649976	DTNA	t	c	780	1.066	++	0.2862	0.790912
	Centiloid	Longitudinal	rs1240974	18	34650949	DTNA	t	c	780	0.306	-+	0.7595	0.92582
	Centiloid	Longitudinal	rs55869511	18	34651262	DTNA	a	c	346	-1.019	-?	0.308	0.796151
	Centiloid	Longitudinal	rs12955208	18	34656737	DTNA	a	g	780	0.263	+-	0.7924	0.92582
	Centiloid	Longitudinal	rs72953203	18	34660068	DTNA	a	g	780	-1.172	--	0.2414	0.778517
	Centiloid	Longitudinal	rs9946070	18	34665505	DTNA	a	g	780	2.974	++	0.002936	0.243038
	Centiloid	Longitudinal	rs72953211	18	34673381	DTNA	a	c	780	-2.101	--	0.03565	0.76035
	Centiloid	Longitudinal	rs55971592	18	34697328	DTNA	a	g	780	-0.273	+-	0.7849	0.92582
	Centiloid	Longitudinal	rs78837792	18	34703359	DTNA	t	c	780	-0.205	+-	0.8376	0.92582
	Centiloid	Longitudinal	rs11663468	18	34707936	DTNA	t	c	780	1.402	++	0.1611	0.76035
	Centiloid	Longitudinal	rs12963825	18	34709484	DTNA	a	g	780	-0.072	--	0.9424	0.963499
	Centiloid	Longitudinal	rs1480432	18	34727166	DTNA	t	g	780	1.283	++	0.1996	0.772014
	Centiloid	Longitudinal	rs45556134	18	34729425	DTNA	a	g	780	-0.262	+-	0.7929	0.92582
	Centiloid	Longitudinal	rs899828	18	34732688	DTNA	t	g	780	-0.339	-+	0.7349	0.92582
	Centiloid	Longitudinal	rs17556884	18	34736455	DTNA	t	c	780	0.794	++	0.4273	0.846073
	Centiloid	Longitudinal	rs1480428	18	34738732	DTNA	a	g	780	-2.916	--	0.003548	0.243038
	Centiloid	Longitudinal	rs12957349	18	34739291	DTNA	t	c	780	0.828	++	0.4074	0.83386
	Centiloid	Longitudinal	rs12608110	18	34752198	DTNA	a	g	780	-1.265	--	0.2058	0.772014
	Centiloid	Longitudinal	rs7228547	18	34760039	DTNA	a	g	780	-1.402	--	0.1611	0.76035
	Centiloid	Longitudinal	rs8099437	18	34761448	DTNA	t	g	780	-2.435	--	0.01489	0.679977
	Centiloid	Longitudinal	rs72955132	18	34762382	DTNA	a	g	780	0	-+	0.9999	0.9999
	Centiloid	Longitudinal	rs1817452	18	34776629	DTNA	t	c	780	0.992	++	0.3214	0.800578
	Centiloid	Longitudinal	rs56404226	18	34778060	DTNA	a	g	780	0.88	-+	0.3787	0.83386
	Centiloid	Longitudinal	rs72955175	18	34779045	DTNA	a	t	780	-1.402	--	0.1611	0.76035
	Centiloid	Longitudinal	rs12608251	18	34782906	DTNA	t	g	780	0.992	+-	0.3214	0.800578
	Centiloid	Longitudinal	rs76880720	18	34791141	DTNA	a	c	780	-0.634	--	0.5258	0.88984
	Centiloid	Longitudinal	rs9989533	18	34793909	DTNA	t	c	780	0.365	++	0.7152	0.92582
	Centiloid	Longitudinal	rs79500711	18	34794379	DTNA	a	g	434	0.583	?+	0.5596	0.901944
	Centiloid	Longitudinal	rs138856611	18	34801684	DTNA	t	g	780	-1.741	--	0.08168	0.76035
	Centiloid	Longitudinal	rs62097226	18	34804223	DTNA	a	t	346	-0.563	-?	0.5731	0.907587
	Centiloid	Longitudinal	rs4458079	18	34806161	DTNA	t	c	780	0.196	-+	0.8448	0.92582
	Centiloid	Longitudinal	rs8086358	18	34813672	DTNA	t	g	780	1.44	++	0.1499	0.76035
	Centiloid	Longitudinal	rs72963047	18	34818804	DTNA	a	c	780	1.963	++	0.04964	0.76035
	Centiloid	Longitudinal	rs17557660	18	34831178	DTNA	a	t	780	0.178	-+	0.8589	0.92582
	Centiloid	Longitudinal	rs1790533	18	34831631	DTNA	a	g	780	0.331	+-	0.7407	0.92582
	Centiloid	Longitudinal	rs4799782	18	34841123	DTNA	a	g	780	1.741	++	0.08168	0.76035
	Centiloid	Longitudinal	rs1786604	18	34846264	DTNA	a	g	780	-1.402	--	0.1611	0.76035
	Centiloid	Longitudinal	rs7233779	18	34863262	DTNA	a	g	780	-0.29	+-	0.7715	0.92582
	Centiloid	Longitudinal	rs644982	18	34869793	DTNA	a	g	780	0.678	++	0.4976	0.88984
	Centiloid	Longitudinal	rs11659517	18	34870978	DTNA	a	t	780	0.191	+-	0.8487	0.92582
	Centiloid	Longitudinal	rs524969	18	34872102	DTNA	a	t	780	-0.354	-+	0.7234	0.92582
	Centiloid	Longitudinal	rs637914	18	34876135	DTNA	a	t	780	-0.543	--	0.5868	0.907587
	Centiloid	Longitudinal	rs9304141	18	34879143	DTNA	t	c	780	0.398	++	0.6905	0.92582
	Centiloid	Longitudinal	rs2288085	18	34879740	DTNA	a	g	780	1.389	++	0.1649	0.76035
	Centiloid	Longitudinal	rs17558116	18	34882719	DTNA	t	c	780	-1.039	--	0.299	0.790912
	Centiloid	Longitudinal	rs10502637	18	34890006	DTNA	t	c	780	-0.84	--	0.401	0.83386
	Centiloid	Longitudinal	rs149163416	18	34898841	DTNA	a	g	780	-0.868	--	0.3856	0.83386
	Centiloid	Longitudinal	20:33413780	20	33413780	SNTA1	a	t	780	-0.843	-+	0.3993	0.83386
	Centiloid	Longitudinal	rs291683	20	33431611	SNTA1	t	c	780	-0.753	+-	0.4513	0.870818
	Centiloid	Longitudinal	20:33433270	20	33433270	SNTA1	t	c	780	0.363	-+	0.7166	0.92582
	Centiloid	Longitudinal	rs6141396	20	33436147	SNTA1	a	c	346	0.636	+?	0.5251	0.88984
	Centiloid	Longitudinal	rs293721	20	33441633	SNTA1	t	c	780	0.939	-+	0.3479	0.83386
	Grey_Matter_Volume	Cross-Sectional	rs111599092	3	49465346	DAG1	a	g	846	-1.005	--	0.3151	0.946822
	Grey_Matter_Volume	Cross-Sectional	rs73073015	3	49465733	DAG1	a	g	846	2.132	++	0.03299	0.946822
	Grey_Matter_Volume	Cross-Sectional	rs7611164	3	49471395	DAG1	t	g	846	0.678	++	0.4978	0.946822
	Grey_Matter_Volume	Cross-Sectional	rs1568661	3	49483525	DAG1	a	g	846	0.895	-+	0.3705	0.946822
	Grey_Matter_Volume	Cross-Sectional	rs7374731	3	49495661	DAG1	c	g	846	0.182	+-	0.8552	0.998358
	Grey_Matter_Volume	Cross-Sectional	rs73074811	3	49516098	DAG1	a	t	846	0.761	++	0.4464	0.946822
	Grey_Matter_Volume	Cross-Sectional	rs3870338	3	49519618	DAG1	a	g	846	0.939	-+	0.3478	0.946822
	Grey_Matter_Volume	Cross-Sectional	rs55935606	3	49528072	DAG1	a	g	846	0.89	++	0.3736	0.946822
	Grey_Matter_Volume	Cross-Sectional	rs75153130	3	49530436	DAG1	a	c	846	-0.678	--	0.4978	0.946822
	Grey_Matter_Volume	Cross-Sectional	rs13079082	3	49537375	DAG1	c	g	846	-1.762	--	0.07805	0.946822
	Grey_Matter_Volume	Cross-Sectional	rs4052546	3	49538116	DAG1	c	g	846	-0.182	-+	0.8552	0.998358
	Grey_Matter_Volume	Cross-Sectional	rs73074830	3	49539584	DAG1	a	c	846	1.106	++	0.2688	0.946822
	Grey_Matter_Volume	Cross-Sectional	rs114093899	3	49539955	DAG1	c	g	518	1.355	?+	0.1754	0.946822
	Grey_Matter_Volume	Cross-Sectional	rs9789109	18	26842291	AQP4	a	g	846	0.079	+-	0.9372	0.9997
	Grey_Matter_Volume	Cross-Sectional	rs10164026	18	26842362	AQP4	a	c	846	-1.359	--	0.1741	0.946822
	Grey_Matter_Volume	Cross-Sectional	rs4800270	18	26844933	AQP4	t	g	846	0.703	++	0.4821	0.946822
	Grey_Matter_Volume	Cross-Sectional	rs79668602	18	26845488	AQP4	a	g	846	-1.086	+-	0.2774	0.946822
	Grey_Matter_Volume	Cross-Sectional	rs12458416	18	26847267	AQP4	c	g	846	0.183	-+	0.8551	0.998358
	Grey_Matter_Volume	Cross-Sectional	rs12953446	18	26848521	AQP4	a	g	846	0.933	++	0.3507	0.946822
	Grey_Matter_Volume	Cross-Sectional	rs67461489	18	26848876	AQP4	t	c	846	0.266	++	0.7905	0.998358
	Grey_Matter_Volume	Cross-Sectional	rs11661081	18	26850068	AQP4	a	c	846	-0.116	--	0.9076	0.9997
	Grey_Matter_Volume	Cross-Sectional	rs3763043	18	26855854	AQP4	t	c	846	-0.837	+-	0.4024	0.946822
	Grey_Matter_Volume	Cross-Sectional	rs68006382	18	26856555	AQP4	a	g	846	0.931	++	0.3518	0.946822
	Grey_Matter_Volume	Cross-Sectional	rs335930	18	26856961	AQP4	a	c	846	-0.665	+-	0.506	0.946822
	Grey_Matter_Volume	Cross-Sectional	rs71353405	18	26857429	AQP4	t	c	846	0.999	++	0.3176	0.946822
	Grey_Matter_Volume	Cross-Sectional	rs162009	18	26864250	AQP4	a	g	846	1.293	++	0.1958	0.946822
	Grey_Matter_Volume	Cross-Sectional	rs4800773	18	26865017	AQP4	a	g	846	0.026	+-	0.9795	0.9997
	Grey_Matter_Volume	Cross-Sectional	rs3875089	18	26865469	AQP4	t	c	846	0.278	+-	0.781	0.998358
	Grey_Matter_Volume	Cross-Sectional	rs72878787	18	26866517	AQP4	a	g	846	0.042	++	0.9662	0.9997
	Grey_Matter_Volume	Cross-Sectional	rs162006	18	26866570	AQP4	t	c	846	-0.759	--	0.4476	0.946822
	Grey_Matter_Volume	Cross-Sectional	rs151244	18	26866755	AQP4	t	c	846	0.412	-+	0.6806	0.991938
	Grey_Matter_Volume	Cross-Sectional	rs72878794	18	26866839	AQP4	t	c	846	-1.366	--	0.1719	0.946822
	Grey_Matter_Volume	Cross-Sectional	rs9961118	18	26866901	AQP4	t	c	846	-0.065	+-	0.948	0.9997
	Grey_Matter_Volume	Cross-Sectional	rs162004	18	26867972	AQP4	c	g	846	-0.458	+-	0.647	0.963467
	Grey_Matter_Volume	Cross-Sectional	rs72878799	18	26868165	AQP4	a	g	846	-0.262	--	0.7933	0.998358
	Grey_Matter_Volume	Cross-Sectional	rs11662318	18	26869056	AQP4	t	c	846	0.598	++	0.5501	0.946822
	Grey_Matter_Volume	Cross-Sectional	rs151246	18	26869139	AQP4	t	g	846	0.06	-+	0.9518	0.9997
	Grey_Matter_Volume	Cross-Sectional	rs491148	18	26869803	AQP4	a	g	846	-0.008	+-	0.9936	0.9997
	Grey_Matter_Volume	Cross-Sectional	rs162002	18	26871015	AQP4	a	g	846	-0.221	-+	0.825	0.998358
	Grey_Matter_Volume	Cross-Sectional	rs162001	18	26871481	AQP4	a	c	846	-0.816	--	0.4148	0.946822
	Grey_Matter_Volume	Cross-Sectional	rs3865411	18	26871684	AQP4	a	g	846	0.612	++	0.5404	0.946822
	Grey_Matter_Volume	Cross-Sectional	rs162000	18	26872471	AQP4	a	c	846	0.725	-+	0.4682	0.946822
	Grey_Matter_Volume	Cross-Sectional	rs12969503	18	26873564	AQP4	t	g	846	0.794	++	0.4272	0.946822
	Grey_Matter_Volume	Cross-Sectional	rs8094228	18	26873767	AQP4	t	c	846	-1.034	--	0.301	0.946822
	Grey_Matter_Volume	Cross-Sectional	rs480647	18	26874290	AQP4	t	c	846	0.466	+-	0.6411	0.963467
	Grey_Matter_Volume	Cross-Sectional	rs10502478	18	26874616	AQP4	a	c	328	-0.727	-?	0.467	0.946822
	Grey_Matter_Volume	Cross-Sectional	rs7234562	18	34483685	DTNA	t	c	846	0.138	-+	0.8906	0.9997
	Grey_Matter_Volume	Cross-Sectional	rs79922046	18	34485536	DTNA	a	g	846	0.702	-+	0.483	0.946822
	Grey_Matter_Volume	Cross-Sectional	rs9955950	18	34485672	DTNA	t	c	846	1.172	++	0.2413	0.946822
	Grey_Matter_Volume	Cross-Sectional	rs12957028	18	34485948	DTNA	a	g	846	-0.504	+-	0.614	0.963467
	Grey_Matter_Volume	Cross-Sectional	rs72639491	18	34491438	DTNA	a	g	846	-0.312	-+	0.7554	0.998358
	Grey_Matter_Volume	Cross-Sectional	rs62097347	18	34492032	DTNA	c	g	846	-0.095	+-	0.9246	0.9997
	Grey_Matter_Volume	Cross-Sectional	rs9961251	18	34492344	DTNA	t	c	846	0.329	++	0.7421	0.998358
	Grey_Matter_Volume	Cross-Sectional	rs111846993	18	34494001	DTNA	t	c	846	-0.027	+-	0.9783	0.9997
	Grey_Matter_Volume	Cross-Sectional	rs4799769	18	34494577	DTNA	c	g	846	0.627	++	0.5304	0.946822
	Grey_Matter_Volume	Cross-Sectional	rs8092794	18	34496273	DTNA	a	g	846	-1.245	--	0.2132	0.946822
	Grey_Matter_Volume	Cross-Sectional	rs7243528	18	34497055	DTNA	t	c	846	1.154	++	0.2486	0.946822
	Grey_Matter_Volume	Cross-Sectional	rs79972565	18	34497194	DTNA	t	g	846	1.143	++	0.2532	0.946822
	Grey_Matter_Volume	Cross-Sectional	rs35839923	18	34497764	DTNA	a	g	846	-1.242	--	0.2144	0.946822
	Grey_Matter_Volume	Cross-Sectional	rs62097349	18	34499519	DTNA	a	g	846	-0.769	-+	0.4419	0.946822
	Grey_Matter_Volume	Cross-Sectional	rs9965622	18	34502153	DTNA	t	c	846	-0.864	--	0.3877	0.946822
	Grey_Matter_Volume	Cross-Sectional	rs62098462	18	34504364	DTNA	t	c	846	-0.183	-+	0.8547	0.998358
	Grey_Matter_Volume	Cross-Sectional	rs75127284	18	34506592	DTNA	a	c	328	-0.928	-?	0.3536	0.946822
	Grey_Matter_Volume	Cross-Sectional	rs2439861	18	34507940	DTNA	a	g	846	0.498	++	0.6187	0.963467
	Grey_Matter_Volume	Cross-Sectional	rs35982920	18	34516411	DTNA	a	g	518	0.468	?+	0.6395	0.963467
	Grey_Matter_Volume	Cross-Sectional	rs2509597	18	34528430	DTNA	a	t	846	-0.043	+-	0.9661	0.9997
	Grey_Matter_Volume	Cross-Sectional	rs71363449	18	34531997	DTNA	t	c	846	-1.162	--	0.2453	0.946822
	Grey_Matter_Volume	Cross-Sectional	rs2439853	18	34533937	DTNA	a	g	846	-1.737	--	0.08236	0.946822
	Grey_Matter_Volume	Cross-Sectional	rs2439000	18	34536414	DTNA	c	g	846	0.207	-+	0.8356	0.998358
	Grey_Matter_Volume	Cross-Sectional	rs11875892	18	34544032	DTNA	a	g	518	0.683	?+	0.4945	0.946822
	Grey_Matter_Volume	Cross-Sectional	rs1967583	18	34544573	DTNA	t	c	846	-0.48	--	0.6314	0.963467
	Grey_Matter_Volume	Cross-Sectional	rs28856895	18	34555507	DTNA	a	g	846	-0.758	+-	0.4486	0.946822
	Grey_Matter_Volume	Cross-Sectional	rs77973497	18	34560529	DTNA	a	c	846	0.079	+-	0.9367	0.9997
	Grey_Matter_Volume	Cross-Sectional	rs2579796	18	34569243	DTNA	a	g	846	-1.321	--	0.1864	0.946822
	Grey_Matter_Volume	Cross-Sectional	rs2579797	18	34571732	DTNA	t	g	846	-0.362	--	0.7172	0.998358
	Grey_Matter_Volume	Cross-Sectional	rs2685557	18	34576782	DTNA	t	c	846	-1.182	--	0.2373	0.946822
	Grey_Matter_Volume	Cross-Sectional	rs9958492	18	34577783	DTNA	t	c	846	-0.619	+-	0.5358	0.946822
	Grey_Matter_Volume	Cross-Sectional	rs2579802	18	34579787	DTNA	a	c	846	0	+-	0.9997	0.9997
	Grey_Matter_Volume	Cross-Sectional	rs74920018	18	34607557	DTNA	a	t	846	0.079	+-	0.9367	0.9997
	Grey_Matter_Volume	Cross-Sectional	rs1439127	18	34607759	DTNA	a	t	846	-0.583	+-	0.5598	0.946822
	Grey_Matter_Volume	Cross-Sectional	rs12327368	18	34611361	DTNA	a	g	846	-0.619	+-	0.5358	0.946822
	Grey_Matter_Volume	Cross-Sectional	rs62097188	18	34611412	DTNA	a	g	846	0.197	++	0.8435	0.998358
	Grey_Matter_Volume	Cross-Sectional	rs9807153	18	34635520	DTNA	a	t	846	1.176	++	0.2395	0.946822
	Grey_Matter_Volume	Cross-Sectional	rs2730126	18	34635939	DTNA	a	c	846	-0.674	--	0.5005	0.946822
	Grey_Matter_Volume	Cross-Sectional	rs1659526	18	34644451	DTNA	a	g	846	-0.133	--	0.8945	0.9997
	Grey_Matter_Volume	Cross-Sectional	rs17642885	18	34649976	DTNA	t	c	846	-0.843	--	0.3992	0.946822
	Grey_Matter_Volume	Cross-Sectional	rs1240974	18	34650949	DTNA	t	c	846	-0.362	--	0.7172	0.998358
	Grey_Matter_Volume	Cross-Sectional	rs55869511	18	34651262	DTNA	a	c	846	-0.326	-+	0.7442	0.998358
	Grey_Matter_Volume	Cross-Sectional	rs12955208	18	34656737	DTNA	a	g	846	0.489	+-	0.6252	0.963467
	Grey_Matter_Volume	Cross-Sectional	rs72953203	18	34660068	DTNA	a	g	846	1.204	++	0.2286	0.946822
	Grey_Matter_Volume	Cross-Sectional	rs9946070	18	34665505	DTNA	a	g	846	-0.636	+-	0.525	0.946822
	Grey_Matter_Volume	Cross-Sectional	rs72953211	18	34673381	DTNA	a	c	846	-0.362	--	0.7175	0.998358
	Grey_Matter_Volume	Cross-Sectional	rs55971592	18	34697328	DTNA	a	g	846	0.299	+-	0.7649	0.998358
	Grey_Matter_Volume	Cross-Sectional	rs78837792	18	34703359	DTNA	t	c	846	-0.949	+-	0.3428	0.946822
	Grey_Matter_Volume	Cross-Sectional	rs11663468	18	34707936	DTNA	t	c	846	-0.677	+-	0.4981	0.946822
	Grey_Matter_Volume	Cross-Sectional	rs12963825	18	34709484	DTNA	a	g	846	-1.052	+-	0.293	0.946822
	Grey_Matter_Volume	Cross-Sectional	rs1480432	18	34727166	DTNA	t	g	846	-0.176	-+	0.8599	0.998358
	Grey_Matter_Volume	Cross-Sectional	rs45556134	18	34729425	DTNA	a	g	846	0.185	-+	0.8533	0.998358
	Grey_Matter_Volume	Cross-Sectional	rs899828	18	34732688	DTNA	t	g	846	0.591	++	0.5548	0.946822
	Grey_Matter_Volume	Cross-Sectional	rs17556884	18	34736455	DTNA	t	c	846	1.287	-+	0.1981	0.946822
	Grey_Matter_Volume	Cross-Sectional	rs1480428	18	34738732	DTNA	a	g	846	0.776	-+	0.4375	0.946822
	Grey_Matter_Volume	Cross-Sectional	rs12957349	18	34739291	DTNA	t	c	846	0.327	-+	0.7436	0.998358
	Grey_Matter_Volume	Cross-Sectional	rs12608110	18	34752198	DTNA	a	g	846	0.494	++	0.6213	0.963467
	Grey_Matter_Volume	Cross-Sectional	rs7228547	18	34760039	DTNA	a	g	846	0.677	-+	0.4981	0.946822
	Grey_Matter_Volume	Cross-Sectional	rs8099437	18	34761448	DTNA	t	g	846	0.776	-+	0.438	0.946822
	Grey_Matter_Volume	Cross-Sectional	rs72955132	18	34762382	DTNA	a	g	846	1.225	-+	0.2206	0.946822
	Grey_Matter_Volume	Cross-Sectional	rs1817452	18	34776629	DTNA	t	c	846	0.681	++	0.4958	0.946822
	Grey_Matter_Volume	Cross-Sectional	rs56404226	18	34778060	DTNA	a	g	846	-1.447	--	0.1479	0.946822
	Grey_Matter_Volume	Cross-Sectional	rs72955175	18	34779045	DTNA	a	t	846	0.677	-+	0.4981	0.946822
	Grey_Matter_Volume	Cross-Sectional	rs12608251	18	34782906	DTNA	t	g	846	0.4	-+	0.689	0.993611
	Grey_Matter_Volume	Cross-Sectional	rs76880720	18	34791141	DTNA	a	c	846	-0.676	+-	0.4993	0.946822
	Grey_Matter_Volume	Cross-Sectional	rs9989533	18	34793909	DTNA	t	c	846	2.014	++	0.04397	0.946822
	Grey_Matter_Volume	Cross-Sectional	rs79500711	18	34794379	DTNA	a	g	518	-0.667	?-	0.5048	0.946822
	Grey_Matter_Volume	Cross-Sectional	rs138856611	18	34801684	DTNA	t	g	846	-0.561	+-	0.5748	0.948766
	Grey_Matter_Volume	Cross-Sectional	rs62097226	18	34804223	DTNA	a	t	328	-1.502	-?	0.1332	0.946822
	Grey_Matter_Volume	Cross-Sectional	rs4458079	18	34806161	DTNA	t	c	846	-0.711	--	0.477	0.946822
	Grey_Matter_Volume	Cross-Sectional	rs8086358	18	34813672	DTNA	t	g	846	-0.59	--	0.5553	0.946822
	Grey_Matter_Volume	Cross-Sectional	rs72963047	18	34818804	DTNA	a	c	846	-0.927	--	0.3537	0.946822
	Grey_Matter_Volume	Cross-Sectional	rs17557660	18	34831178	DTNA	a	t	846	1.407	++	0.1594	0.946822
	Grey_Matter_Volume	Cross-Sectional	rs1790533	18	34831631	DTNA	a	g	846	0.83	-+	0.4064	0.946822
	Grey_Matter_Volume	Cross-Sectional	rs4799782	18	34841123	DTNA	a	g	846	0.561	-+	0.5748	0.948766
	Grey_Matter_Volume	Cross-Sectional	rs1786604	18	34846264	DTNA	a	g	846	0.5	-+	0.617	0.963467
	Grey_Matter_Volume	Cross-Sectional	rs7233779	18	34863262	DTNA	a	g	846	-1.389	--	0.1648	0.946822
	Grey_Matter_Volume	Cross-Sectional	rs644982	18	34869793	DTNA	a	g	846	-0.005	+-	0.9964	0.9997
	Grey_Matter_Volume	Cross-Sectional	rs11659517	18	34870978	DTNA	a	t	846	0.944	-+	0.3451	0.946822
	Grey_Matter_Volume	Cross-Sectional	rs524969	18	34872102	DTNA	a	t	846	-0.631	+-	0.528	0.946822
	Grey_Matter_Volume	Cross-Sectional	rs637914	18	34876135	DTNA	a	t	846	-0.056	+-	0.9552	0.9997
	Grey_Matter_Volume	Cross-Sectional	rs9304141	18	34879143	DTNA	t	c	846	1.076	+-	0.2817	0.946822
	Grey_Matter_Volume	Cross-Sectional	rs2288085	18	34879740	DTNA	a	g	846	0.323	+-	0.7466	0.998358
	Grey_Matter_Volume	Cross-Sectional	rs17558116	18	34882719	DTNA	t	c	846	0.853	-+	0.3938	0.946822
	Grey_Matter_Volume	Cross-Sectional	rs10502637	18	34890006	DTNA	t	c	846	-0.064	--	0.9487	0.9997
	Grey_Matter_Volume	Cross-Sectional	rs149163416	18	34898841	DTNA	a	g	846	-0.279	-+	0.7804	0.998358
	Grey_Matter_Volume	Cross-Sectional	20:33413780	20	33413780	SNTA1	a	t	846	0.141	-+	0.8877	0.9997
	Grey_Matter_Volume	Cross-Sectional	rs291683	20	33431611	SNTA1	t	c	846	0.223	++	0.8237	0.998358
	Grey_Matter_Volume	Cross-Sectional	20:33433270	20	33433270	SNTA1	t	c	846	-1.158	--	0.2468	0.946822
	Grey_Matter_Volume	Cross-Sectional	rs6141396	20	33436147	SNTA1	a	c	328	-0.424	-?	0.6714	0.989052
	Grey_Matter_Volume	Cross-Sectional	rs293721	20	33441633	SNTA1	t	c	846	-0.978	--	0.328	0.946822
	Grey_Matter_Volume	Longitudinal	rs111599092	3	49465346	DAG1	a	g	309	0.453	-+	0.6506	0.9976
	Grey_Matter_Volume	Longitudinal	rs73073015	3	49465733	DAG1	a	g	140	0.369	?+	0.7122	0.9976
	Grey_Matter_Volume	Longitudinal	rs7611164	3	49471395	DAG1	t	g	309	0.284	+-	0.7766	0.9976
	Grey_Matter_Volume	Longitudinal	rs1568661	3	49483525	DAG1	a	g	309	-0.779	-+	0.4357	0.9976
	Grey_Matter_Volume	Longitudinal	rs7374731	3	49495661	DAG1	c	g	309	-1.299	-+	0.1938	0.9256
	Grey_Matter_Volume	Longitudinal	rs3870338	3	49519618	DAG1	a	g	309	-0.779	-+	0.4357	0.9976
	Grey_Matter_Volume	Longitudinal	rs55935606	3	49528072	DAG1	a	g	309	0.5	+-	0.6168	0.9976
	Grey_Matter_Volume	Longitudinal	rs75153130	3	49530436	DAG1	a	c	309	-0.284	-+	0.7766	0.9976
	Grey_Matter_Volume	Longitudinal	rs13079082	3	49537375	DAG1	c	g	309	-1.579	--	0.1143	0.9256
	Grey_Matter_Volume	Longitudinal	rs4052546	3	49538116	DAG1	c	g	309	1.299	+-	0.1938	0.9256
	Grey_Matter_Volume	Longitudinal	rs73074830	3	49539584	DAG1	a	c	309	-0.598	+-	0.5496	0.9976
	Grey_Matter_Volume	Longitudinal	rs114093899	3	49539955	DAG1	c	g	140	-0.873	?-	0.3829	0.9976
	Grey_Matter_Volume	Longitudinal	rs9789109	18	26842291	AQP4	a	g	309	0.611	+-	0.5415	0.9976
	Grey_Matter_Volume	Longitudinal	rs10164026	18	26842362	AQP4	a	c	309	0.229	-+	0.8192	0.9976
	Grey_Matter_Volume	Longitudinal	rs4800270	18	26844933	AQP4	t	g	309	-2.354	--	0.01856	0.48256
	Grey_Matter_Volume	Longitudinal	rs79668602	18	26845488	AQP4	a	g	309	-0.504	--	0.6144	0.9976
	Grey_Matter_Volume	Longitudinal	rs12458416	18	26847267	AQP4	c	g	309	0.023	-+	0.9814	0.9976
	Grey_Matter_Volume	Longitudinal	rs12953446	18	26848521	AQP4	a	g	309	-1.495	--	0.1348	0.9256
	Grey_Matter_Volume	Longitudinal	rs67461489	18	26848876	AQP4	t	c	169	0.452	+?	0.6512	0.9976
	Grey_Matter_Volume	Longitudinal	rs11661081	18	26850068	AQP4	a	c	309	-0.483	+-	0.6292	0.9976
	Grey_Matter_Volume	Longitudinal	rs3763043	18	26855854	AQP4	t	c	309	-0.743	--	0.4576	0.9976
	Grey_Matter_Volume	Longitudinal	rs68006382	18	26856555	AQP4	a	g	309	1.253	++	0.2102	0.9256
	Grey_Matter_Volume	Longitudinal	rs335930	18	26856961	AQP4	a	c	309	-0.277	-+	0.782	0.9976
	Grey_Matter_Volume	Longitudinal	rs71353405	18	26857429	AQP4	t	c	169	-0.783	-?	0.4336	0.9976
	Grey_Matter_Volume	Longitudinal	rs162009	18	26864250	AQP4	a	g	309	-0.67	--	0.5029	0.9976
	Grey_Matter_Volume	Longitudinal	rs4800773	18	26865017	AQP4	a	g	309	-1.753	--	0.07953	0.777864
	Grey_Matter_Volume	Longitudinal	rs3875089	18	26865469	AQP4	t	c	309	0.164	+-	0.87	0.9976
	Grey_Matter_Volume	Longitudinal	rs72878787	18	26866517	AQP4	a	g	309	-0.162	-+	0.8714	0.9976
	Grey_Matter_Volume	Longitudinal	rs162006	18	26866570	AQP4	t	c	309	0.358	-+	0.72	0.9976
	Grey_Matter_Volume	Longitudinal	rs151244	18	26866755	AQP4	t	c	309	0.851	-+	0.3949	0.9976
	Grey_Matter_Volume	Longitudinal	rs72878794	18	26866839	AQP4	t	c	309	1.257	++	0.2088	0.9256
	Grey_Matter_Volume	Longitudinal	rs9961118	18	26866901	AQP4	t	c	309	0.379	++	0.7046	0.9976
	Grey_Matter_Volume	Longitudinal	rs162004	18	26867972	AQP4	c	g	309	1.577	++	0.1147	0.9256
	Grey_Matter_Volume	Longitudinal	rs72878799	18	26868165	AQP4	a	g	309	0.583	++	0.5598	0.9976
	Grey_Matter_Volume	Longitudinal	rs11662318	18	26869056	AQP4	t	c	309	-0.697	+-	0.4857	0.9976
	Grey_Matter_Volume	Longitudinal	rs151246	18	26869139	AQP4	t	g	309	1.935	++	0.05294	0.777864
	Grey_Matter_Volume	Longitudinal	rs491148	18	26869803	AQP4	a	g	309	0.823	-+	0.4102	0.9976
	Grey_Matter_Volume	Longitudinal	rs162002	18	26871015	AQP4	a	g	309	-0.331	-+	0.7404	0.9976
	Grey_Matter_Volume	Longitudinal	rs162001	18	26871481	AQP4	a	c	309	0.038	-+	0.9695	0.9976
	Grey_Matter_Volume	Longitudinal	rs3865411	18	26871684	AQP4	a	g	309	-0.164	+-	0.87	0.9976
	Grey_Matter_Volume	Longitudinal	rs162000	18	26872471	AQP4	a	c	309	-0.486	-+	0.6269	0.9976
	Grey_Matter_Volume	Longitudinal	rs12969503	18	26873564	AQP4	t	g	309	-0.775	--	0.4383	0.9976
	Grey_Matter_Volume	Longitudinal	rs8094228	18	26873767	AQP4	t	c	309	0.082	+-	0.9347	0.9976
	Grey_Matter_Volume	Longitudinal	rs480647	18	26874290	AQP4	t	c	309	-0.804	--	0.4216	0.9976
	Grey_Matter_Volume	Longitudinal	rs7234562	18	34483685	DTNA	t	c	309	0.69	++	0.4903	0.9976
	Grey_Matter_Volume	Longitudinal	rs79922046	18	34485536	DTNA	a	g	169	-1.863	-?	0.0625	0.777864
	Grey_Matter_Volume	Longitudinal	rs9955950	18	34485672	DTNA	t	c	309	-1.11	--	0.2669	0.9976
	Grey_Matter_Volume	Longitudinal	rs12957028	18	34485948	DTNA	a	g	169	1.37	+?	0.1706	0.9256
	Grey_Matter_Volume	Longitudinal	rs72639491	18	34491438	DTNA	a	g	309	1.831	++	0.06711	0.777864
	Grey_Matter_Volume	Longitudinal	rs62097347	18	34492032	DTNA	c	g	309	-0.527	--	0.5983	0.9976
	Grey_Matter_Volume	Longitudinal	rs9961251	18	34492344	DTNA	t	c	309	-0.899	-+	0.3688	0.9976
	Grey_Matter_Volume	Longitudinal	rs111846993	18	34494001	DTNA	t	c	169	-0.461	-?	0.6451	0.9976
	Grey_Matter_Volume	Longitudinal	rs4799769	18	34494577	DTNA	c	g	309	0.128	+-	0.8985	0.9976
	Grey_Matter_Volume	Longitudinal	rs8092794	18	34496273	DTNA	a	g	309	0.573	++	0.5668	0.9976
	Grey_Matter_Volume	Longitudinal	rs7243528	18	34497055	DTNA	t	c	309	-0.277	-+	0.7816	0.9976
	Grey_Matter_Volume	Longitudinal	rs35839923	18	34497764	DTNA	a	g	309	-0.856	--	0.392	0.9976
	Grey_Matter_Volume	Longitudinal	rs62097349	18	34499519	DTNA	a	g	309	0.292	+-	0.77	0.9976
	Grey_Matter_Volume	Longitudinal	rs9965622	18	34502153	DTNA	t	c	309	1.167	++	0.2434	0.9976
	Grey_Matter_Volume	Longitudinal	rs62098462	18	34504364	DTNA	t	c	309	1.149	++	0.2506	0.9976
	Grey_Matter_Volume	Longitudinal	rs75127284	18	34506592	DTNA	a	c	169	1.079	+?	0.2807	0.9976
	Grey_Matter_Volume	Longitudinal	rs2439861	18	34507940	DTNA	a	g	309	-0.309	-+	0.7571	0.9976
	Grey_Matter_Volume	Longitudinal	rs2509597	18	34528430	DTNA	a	t	309	-1.318	--	0.1876	0.9256
	Grey_Matter_Volume	Longitudinal	rs71363449	18	34531997	DTNA	t	c	169	0.148	+?	0.8822	0.9976
	Grey_Matter_Volume	Longitudinal	rs2439853	18	34533937	DTNA	a	g	309	-0.062	+-	0.9505	0.9976
	Grey_Matter_Volume	Longitudinal	rs2439000	18	34536414	DTNA	c	g	309	0.126	-+	0.8997	0.9976
	Grey_Matter_Volume	Longitudinal	rs1967583	18	34544573	DTNA	t	c	309	-0.445	-+	0.6562	0.9976
	Grey_Matter_Volume	Longitudinal	rs28856895	18	34555507	DTNA	a	g	309	-0.83	--	0.4066	0.9976
	Grey_Matter_Volume	Longitudinal	rs77973497	18	34560529	DTNA	a	c	140	2.54	?+	0.01109	0.360425
	Grey_Matter_Volume	Longitudinal	rs2579796	18	34569243	DTNA	a	g	309	0.02	+-	0.984	0.9976
	Grey_Matter_Volume	Longitudinal	rs2579797	18	34571732	DTNA	t	g	309	-0.126	+-	0.8997	0.9976
	Grey_Matter_Volume	Longitudinal	rs2685557	18	34576782	DTNA	t	c	309	0.02	+-	0.984	0.9976
	Grey_Matter_Volume	Longitudinal	rs9958492	18	34577783	DTNA	t	c	169	0.232	+?	0.8169	0.9976
	Grey_Matter_Volume	Longitudinal	rs2579802	18	34579787	DTNA	a	c	309	-0.202	+-	0.84	0.9976
	Grey_Matter_Volume	Longitudinal	rs74920018	18	34607557	DTNA	a	t	140	2.54	?+	0.01109	0.360425
	Grey_Matter_Volume	Longitudinal	rs1439127	18	34607759	DTNA	a	t	169	0.586	+?	0.5578	0.9976
	Grey_Matter_Volume	Longitudinal	rs12327368	18	34611361	DTNA	a	g	169	0.232	+?	0.8169	0.9976
	Grey_Matter_Volume	Longitudinal	rs62097188	18	34611412	DTNA	a	g	309	0.733	-+	0.4637	0.9976
	Grey_Matter_Volume	Longitudinal	rs9807153	18	34635520	DTNA	a	t	309	-0.421	+-	0.6735	0.9976
	Grey_Matter_Volume	Longitudinal	rs2730126	18	34635939	DTNA	a	c	309	0.136	+-	0.8916	0.9976
	Grey_Matter_Volume	Longitudinal	rs1659526	18	34644451	DTNA	a	g	309	0.189	+-	0.8501	0.9976
	Grey_Matter_Volume	Longitudinal	rs1240974	18	34650949	DTNA	t	c	309	-0.126	+-	0.8997	0.9976
	Grey_Matter_Volume	Longitudinal	rs55869511	18	34651262	DTNA	a	c	169	-0.121	-?	0.9033	0.9976
	Grey_Matter_Volume	Longitudinal	rs12955208	18	34656737	DTNA	a	g	309	1.244	++	0.2136	0.9256
	Grey_Matter_Volume	Longitudinal	rs72953203	18	34660068	DTNA	a	g	309	1.859	++	0.06309	0.777864
	Grey_Matter_Volume	Longitudinal	rs9946070	18	34665505	DTNA	a	g	309	0.546	+-	0.585	0.9976
	Grey_Matter_Volume	Longitudinal	rs72953211	18	34673381	DTNA	a	c	309	-1.102	-+	0.2706	0.9976
	Grey_Matter_Volume	Longitudinal	rs55971592	18	34697328	DTNA	a	g	309	-1.543	--	0.1229	0.9256
	Grey_Matter_Volume	Longitudinal	rs78837792	18	34703359	DTNA	t	c	309	-2.196	--	0.02811	0.522043
	Grey_Matter_Volume	Longitudinal	rs11663468	18	34707936	DTNA	t	c	309	0.11	+-	0.9125	0.9976
	Grey_Matter_Volume	Longitudinal	rs12963825	18	34709484	DTNA	a	g	169	-0.093	-?	0.9262	0.9976
	Grey_Matter_Volume	Longitudinal	rs1480432	18	34727166	DTNA	t	g	309	2.823	++	0.004755	0.360425
	Grey_Matter_Volume	Longitudinal	rs45556134	18	34729425	DTNA	a	g	140	-0.003	?-	0.9976	0.9976
	Grey_Matter_Volume	Longitudinal	rs17556884	18	34736455	DTNA	t	c	169	-0.232	-?	0.8169	0.9976
	Grey_Matter_Volume	Longitudinal	rs1480428	18	34738732	DTNA	a	g	309	-0.337	--	0.7362	0.9976
	Grey_Matter_Volume	Longitudinal	rs12957349	18	34739291	DTNA	t	c	309	1.245	++	0.2132	0.9256
	Grey_Matter_Volume	Longitudinal	rs12608110	18	34752198	DTNA	a	g	309	0.718	-+	0.4726	0.9976
	Grey_Matter_Volume	Longitudinal	rs7228547	18	34760039	DTNA	a	g	309	-0.11	-+	0.9125	0.9976
	Grey_Matter_Volume	Longitudinal	rs8099437	18	34761448	DTNA	t	g	309	-0.337	--	0.7362	0.9976
	Grey_Matter_Volume	Longitudinal	rs72955132	18	34762382	DTNA	a	g	169	-0.232	-?	0.8169	0.9976
	Grey_Matter_Volume	Longitudinal	rs1817452	18	34776629	DTNA	t	c	309	1.114	++	0.2654	0.9976
	Grey_Matter_Volume	Longitudinal	rs56404226	18	34778060	DTNA	a	g	309	0.391	+-	0.696	0.9976
	Grey_Matter_Volume	Longitudinal	rs72955175	18	34779045	DTNA	a	t	309	-0.11	-+	0.9125	0.9976
	Grey_Matter_Volume	Longitudinal	rs12608251	18	34782906	DTNA	t	g	309	1.729	++	0.08377	0.777864
	Grey_Matter_Volume	Longitudinal	rs76880720	18	34791141	DTNA	a	c	309	-1.344	--	0.1789	0.9256
	Grey_Matter_Volume	Longitudinal	rs9989533	18	34793909	DTNA	t	c	309	0.028	-+	0.978	0.9976
	Grey_Matter_Volume	Longitudinal	rs79500711	18	34794379	DTNA	a	g	140	-0.48	?-	0.6313	0.9976
	Grey_Matter_Volume	Longitudinal	rs138856611	18	34801684	DTNA	t	g	140	-0.197	?-	0.844	0.9976
	Grey_Matter_Volume	Longitudinal	rs62097226	18	34804223	DTNA	a	t	169	0.519	+?	0.6037	0.9976
	Grey_Matter_Volume	Longitudinal	rs4458079	18	34806161	DTNA	t	c	309	-0.108	+-	0.9144	0.9976
	Grey_Matter_Volume	Longitudinal	rs8086358	18	34813672	DTNA	t	g	309	-0.035	+-	0.972	0.9976
	Grey_Matter_Volume	Longitudinal	rs72963047	18	34818804	DTNA	a	c	309	-1.738	--	0.08213	0.777864
	Grey_Matter_Volume	Longitudinal	rs17557660	18	34831178	DTNA	a	t	140	0.263	?+	0.7926	0.9976
	Grey_Matter_Volume	Longitudinal	rs1790533	18	34831631	DTNA	a	g	309	2.243	++	0.02491	0.522043
	Grey_Matter_Volume	Longitudinal	rs4799782	18	34841123	DTNA	a	g	140	0.197	?+	0.844	0.9976
	Grey_Matter_Volume	Longitudinal	rs1786604	18	34846264	DTNA	a	g	309	-0.11	-+	0.9125	0.9976
	Grey_Matter_Volume	Longitudinal	rs7233779	18	34863262	DTNA	a	g	309	-1.272	--	0.2035	0.9256
	Grey_Matter_Volume	Longitudinal	rs644982	18	34869793	DTNA	a	g	309	-0.866	--	0.3864	0.9976
	Grey_Matter_Volume	Longitudinal	rs11659517	18	34870978	DTNA	a	t	309	0.756	++	0.4495	0.9976
	Grey_Matter_Volume	Longitudinal	rs524969	18	34872102	DTNA	a	t	309	-1.459	--	0.1447	0.9256
	Grey_Matter_Volume	Longitudinal	rs637914	18	34876135	DTNA	a	t	309	-0.549	-+	0.5828	0.9976
	Grey_Matter_Volume	Longitudinal	rs9304141	18	34879143	DTNA	t	c	309	0.156	+-	0.8762	0.9976
	Grey_Matter_Volume	Longitudinal	rs2288085	18	34879740	DTNA	a	g	309	-1.293	--	0.1958	0.9256
	Grey_Matter_Volume	Longitudinal	rs17558116	18	34882719	DTNA	t	c	309	0.151	+-	0.8797	0.9976
	Grey_Matter_Volume	Longitudinal	rs10502637	18	34890006	DTNA	t	c	309	-2.652	--	0.007994	0.360425
	Grey_Matter_Volume	Longitudinal	rs149163416	18	34898841	DTNA	a	g	309	0.093	++	0.9262	0.9976
	Grey_Matter_Volume	Longitudinal	20:33413780	20	33413780	SNTA1	a	t	309	0.011	-+	0.991	0.9976
	Grey_Matter_Volume	Longitudinal	rs291683	20	33431611	SNTA1	t	c	309	0.52	++	0.6029	0.9976
	Grey_Matter_Volume	Longitudinal	20:33433270	20	33433270	SNTA1	t	c	309	-0.038	-+	0.9695	0.9976
	Grey_Matter_Volume	Longitudinal	rs6141396	20	33436147	SNTA1	a	c	169	-0.738	-?	0.4604	0.9976
	Grey_Matter_Volume	Longitudinal	rs293721	20	33441633	SNTA1	t	c	169	1.051	+?	0.2934	0.9976
	Hippocampal_Volume	Cross-Sectional	rs111599092	3	49465346	DAG1	a	g	846	0.043	-+	0.966	0.9741
	Hippocampal_Volume	Cross-Sectional	rs73073015	3	49465733	DAG1	a	g	846	0.934	+-	0.3502	0.932375
	Hippocampal_Volume	Cross-Sectional	rs7611164	3	49471395	DAG1	t	g	846	0.158	-+	0.8747	0.9741
	Hippocampal_Volume	Cross-Sectional	rs1568661	3	49483525	DAG1	a	g	846	1.199	++	0.2304	0.932375
	Hippocampal_Volume	Cross-Sectional	rs7374731	3	49495661	DAG1	c	g	846	-0.386	-+	0.6998	0.932375
	Hippocampal_Volume	Cross-Sectional	rs73074811	3	49516098	DAG1	a	t	846	1.335	+-	0.1818	0.932375
	Hippocampal_Volume	Cross-Sectional	rs3870338	3	49519618	DAG1	a	g	846	1.04	++	0.2985	0.932375
	Hippocampal_Volume	Cross-Sectional	rs55935606	3	49528072	DAG1	a	g	846	0.534	+-	0.5932	0.932375
	Hippocampal_Volume	Cross-Sectional	rs75153130	3	49530436	DAG1	a	c	846	-0.158	+-	0.8747	0.9741
	Hippocampal_Volume	Cross-Sectional	rs13079082	3	49537375	DAG1	c	g	846	-0.372	--	0.7102	0.932375
	Hippocampal_Volume	Cross-Sectional	rs4052546	3	49538116	DAG1	c	g	846	0.386	+-	0.6998	0.932375
	Hippocampal_Volume	Cross-Sectional	rs73074830	3	49539584	DAG1	a	c	846	0.113	+-	0.9103	0.9741
	Hippocampal_Volume	Cross-Sectional	rs114093899	3	49539955	DAG1	c	g	518	0.336	?+	0.7372	0.935152
	Hippocampal_Volume	Cross-Sectional	rs9789109	18	26842291	AQP4	a	g	846	-0.302	+-	0.7624	0.949535
	Hippocampal_Volume	Cross-Sectional	rs10164026	18	26842362	AQP4	a	c	846	-0.086	--	0.9311	0.9741
	Hippocampal_Volume	Cross-Sectional	rs4800270	18	26844933	AQP4	t	g	846	-1.521	--	0.1283	0.925111
	Hippocampal_Volume	Cross-Sectional	rs79668602	18	26845488	AQP4	a	g	846	0.433	-+	0.6652	0.932375
	Hippocampal_Volume	Cross-Sectional	rs12458416	18	26847267	AQP4	c	g	846	-0.495	-+	0.6205	0.932375
	Hippocampal_Volume	Cross-Sectional	rs12953446	18	26848521	AQP4	a	g	846	-0.032	+-	0.9741	0.9741
	Hippocampal_Volume	Cross-Sectional	rs67461489	18	26848876	AQP4	t	c	846	0.315	-+	0.753	0.946431
	Hippocampal_Volume	Cross-Sectional	rs11661081	18	26850068	AQP4	a	c	846	0.175	+-	0.8609	0.9741
	Hippocampal_Volume	Cross-Sectional	rs3763043	18	26855854	AQP4	t	c	846	0.628	++	0.5299	0.932375
	Hippocampal_Volume	Cross-Sectional	rs68006382	18	26856555	AQP4	a	g	846	-0.114	+-	0.9089	0.9741
	Hippocampal_Volume	Cross-Sectional	rs335930	18	26856961	AQP4	a	c	846	-0.204	--	0.8385	0.9741
	Hippocampal_Volume	Cross-Sectional	rs71353405	18	26857429	AQP4	t	c	846	-0.074	+-	0.9413	0.9741
	Hippocampal_Volume	Cross-Sectional	rs162009	18	26864250	AQP4	a	g	846	0.536	+-	0.5917	0.932375
	Hippocampal_Volume	Cross-Sectional	rs4800773	18	26865017	AQP4	a	g	846	-0.053	-+	0.9575	0.9741
	Hippocampal_Volume	Cross-Sectional	rs3875089	18	26865469	AQP4	t	c	846	1.082	++	0.2795	0.932375
	Hippocampal_Volume	Cross-Sectional	rs72878787	18	26866517	AQP4	a	g	846	-1.101	--	0.271	0.932375
	Hippocampal_Volume	Cross-Sectional	rs162006	18	26866570	AQP4	t	c	846	-0.738	+-	0.4603	0.932375
	Hippocampal_Volume	Cross-Sectional	rs151244	18	26866755	AQP4	t	c	846	0.495	++	0.6206	0.932375
	Hippocampal_Volume	Cross-Sectional	rs72878794	18	26866839	AQP4	t	c	846	0.859	-+	0.3903	0.932375
	Hippocampal_Volume	Cross-Sectional	rs9961118	18	26866901	AQP4	t	c	846	2.853	++	0.004333	0.582624
	Hippocampal_Volume	Cross-Sectional	rs162004	18	26867972	AQP4	c	g	846	-0.82	+-	0.4125	0.932375
	Hippocampal_Volume	Cross-Sectional	rs72878799	18	26868165	AQP4	a	g	846	-0.096	+-	0.9236	0.9741
	Hippocampal_Volume	Cross-Sectional	rs11662318	18	26869056	AQP4	t	c	846	-0.616	+-	0.5378	0.932375
	Hippocampal_Volume	Cross-Sectional	rs151246	18	26869139	AQP4	t	g	846	-0.734	--	0.4627	0.932375
	Hippocampal_Volume	Cross-Sectional	rs491148	18	26869803	AQP4	a	g	846	1.1	-+	0.2715	0.932375
	Hippocampal_Volume	Cross-Sectional	rs162002	18	26871015	AQP4	a	g	846	1.093	-+	0.2744	0.932375
	Hippocampal_Volume	Cross-Sectional	rs162001	18	26871481	AQP4	a	c	846	-1.141	--	0.2539	0.932375
	Hippocampal_Volume	Cross-Sectional	rs3865411	18	26871684	AQP4	a	g	846	1.082	++	0.2794	0.932375
	Hippocampal_Volume	Cross-Sectional	rs162000	18	26872471	AQP4	a	c	846	1.333	++	0.1824	0.932375
	Hippocampal_Volume	Cross-Sectional	rs12969503	18	26873564	AQP4	t	g	846	0.759	-+	0.4477	0.932375
	Hippocampal_Volume	Cross-Sectional	rs8094228	18	26873767	AQP4	t	c	846	-0.867	+-	0.386	0.932375
	Hippocampal_Volume	Cross-Sectional	rs480647	18	26874290	AQP4	t	c	846	-1.565	+-	0.1176	0.925111
	Hippocampal_Volume	Cross-Sectional	rs10502478	18	26874616	AQP4	a	c	328	-0.694	-?	0.4879	0.932375
	Hippocampal_Volume	Cross-Sectional	rs7234562	18	34483685	DTNA	t	c	846	0.051	+-	0.9591	0.9741
	Hippocampal_Volume	Cross-Sectional	rs79922046	18	34485536	DTNA	a	g	846	0.918	++	0.3584	0.932375
	Hippocampal_Volume	Cross-Sectional	rs9955950	18	34485672	DTNA	t	c	846	-0.912	-+	0.362	0.932375
	Hippocampal_Volume	Cross-Sectional	rs12957028	18	34485948	DTNA	a	g	846	-0.244	-+	0.8071	0.9741
	Hippocampal_Volume	Cross-Sectional	rs72639491	18	34491438	DTNA	a	g	846	0.885	++	0.3764	0.932375
	Hippocampal_Volume	Cross-Sectional	rs62097347	18	34492032	DTNA	c	g	846	0.357	+-	0.7214	0.932375
	Hippocampal_Volume	Cross-Sectional	rs9961251	18	34492344	DTNA	t	c	846	-0.067	-+	0.9469	0.9741
	Hippocampal_Volume	Cross-Sectional	rs111846993	18	34494001	DTNA	t	c	846	-0.358	+-	0.7203	0.932375
	Hippocampal_Volume	Cross-Sectional	rs4799769	18	34494577	DTNA	c	g	846	1.033	++	0.3017	0.932375
	Hippocampal_Volume	Cross-Sectional	rs8092794	18	34496273	DTNA	a	g	846	0.065	-+	0.9485	0.9741
	Hippocampal_Volume	Cross-Sectional	rs7243528	18	34497055	DTNA	t	c	846	-0.457	--	0.6473	0.932375
	Hippocampal_Volume	Cross-Sectional	rs79972565	18	34497194	DTNA	t	g	846	-1.534	--	0.1252	0.925111
	Hippocampal_Volume	Cross-Sectional	rs35839923	18	34497764	DTNA	a	g	846	-1.988	--	0.04678	0.582624
	Hippocampal_Volume	Cross-Sectional	rs62097349	18	34499519	DTNA	a	g	846	-0.879	-+	0.3793	0.932375
	Hippocampal_Volume	Cross-Sectional	rs9965622	18	34502153	DTNA	t	c	846	0.721	-+	0.471	0.932375
	Hippocampal_Volume	Cross-Sectional	rs62098462	18	34504364	DTNA	t	c	846	-0.12	-+	0.9041	0.9741
	Hippocampal_Volume	Cross-Sectional	rs75127284	18	34506592	DTNA	a	c	328	-0.105	-?	0.9163	0.9741
	Hippocampal_Volume	Cross-Sectional	rs2439861	18	34507940	DTNA	a	g	846	0.975	++	0.3296	0.932375
	Hippocampal_Volume	Cross-Sectional	rs35982920	18	34516411	DTNA	a	g	518	1.36	?+	0.1737	0.932375
	Hippocampal_Volume	Cross-Sectional	rs2509597	18	34528430	DTNA	a	t	846	2	++	0.04552	0.582624
	Hippocampal_Volume	Cross-Sectional	rs71363449	18	34531997	DTNA	t	c	846	-2.226	--	0.02599	0.582624
	Hippocampal_Volume	Cross-Sectional	rs2439853	18	34533937	DTNA	a	g	846	-1.549	--	0.1214	0.925111
	Hippocampal_Volume	Cross-Sectional	rs2439000	18	34536414	DTNA	c	g	846	0.582	-+	0.5605	0.932375
	Hippocampal_Volume	Cross-Sectional	rs11875892	18	34544032	DTNA	a	g	518	0.463	?+	0.6431	0.932375
	Hippocampal_Volume	Cross-Sectional	rs1967583	18	34544573	DTNA	t	c	846	-0.21	--	0.8336	0.9741
	Hippocampal_Volume	Cross-Sectional	rs28856895	18	34555507	DTNA	a	g	846	-0.843	--	0.3993	0.932375
	Hippocampal_Volume	Cross-Sectional	rs77973497	18	34560529	DTNA	a	c	846	0.51	++	0.6099	0.932375
	Hippocampal_Volume	Cross-Sectional	rs2579796	18	34569243	DTNA	a	g	846	-1.809	--	0.07051	0.743067
	Hippocampal_Volume	Cross-Sectional	rs2579797	18	34571732	DTNA	t	g	846	-1.087	--	0.2772	0.932375
	Hippocampal_Volume	Cross-Sectional	rs2685557	18	34576782	DTNA	t	c	846	-2.191	--	0.02848	0.582624
	Hippocampal_Volume	Cross-Sectional	rs9958492	18	34577783	DTNA	t	c	846	-2.149	--	0.03162	0.582624
	Hippocampal_Volume	Cross-Sectional	rs2579802	18	34579787	DTNA	a	c	846	-0.397	+-	0.6912	0.932375
	Hippocampal_Volume	Cross-Sectional	rs74920018	18	34607557	DTNA	a	t	846	0.51	++	0.6099	0.932375
	Hippocampal_Volume	Cross-Sectional	rs1439127	18	34607759	DTNA	a	t	846	-0.394	+-	0.6937	0.932375
	Hippocampal_Volume	Cross-Sectional	rs12327368	18	34611361	DTNA	a	g	846	-2.149	--	0.03162	0.582624
	Hippocampal_Volume	Cross-Sectional	rs62097188	18	34611412	DTNA	a	g	846	0.831	++	0.4061	0.932375
	Hippocampal_Volume	Cross-Sectional	rs9807153	18	34635520	DTNA	a	t	846	1.01	++	0.3125	0.932375
	Hippocampal_Volume	Cross-Sectional	rs2730126	18	34635939	DTNA	a	c	846	-1.998	--	0.04571	0.582624
	Hippocampal_Volume	Cross-Sectional	rs1659526	18	34644451	DTNA	a	g	846	-0.445	+-	0.6564	0.932375
	Hippocampal_Volume	Cross-Sectional	rs17642885	18	34649976	DTNA	t	c	846	0.153	++	0.8785	0.9741
	Hippocampal_Volume	Cross-Sectional	rs1240974	18	34650949	DTNA	t	c	846	-1.087	--	0.2772	0.932375
	Hippocampal_Volume	Cross-Sectional	rs55869511	18	34651262	DTNA	a	c	846	0.78	++	0.4355	0.932375
	Hippocampal_Volume	Cross-Sectional	rs12955208	18	34656737	DTNA	a	g	846	0.43	+-	0.6673	0.932375
	Hippocampal_Volume	Cross-Sectional	rs72953203	18	34660068	DTNA	a	g	846	2.114	++	0.03454	0.582624
	Hippocampal_Volume	Cross-Sectional	rs9946070	18	34665505	DTNA	a	g	846	-0.379	+-	0.7043	0.932375
	Hippocampal_Volume	Cross-Sectional	rs72953211	18	34673381	DTNA	a	c	846	-0.706	-+	0.4801	0.932375
	Hippocampal_Volume	Cross-Sectional	rs55971592	18	34697328	DTNA	a	g	846	-0.584	+-	0.5591	0.932375
	Hippocampal_Volume	Cross-Sectional	rs78837792	18	34703359	DTNA	t	c	846	-2.12	+-	0.03398	0.582624
	Hippocampal_Volume	Cross-Sectional	rs11663468	18	34707936	DTNA	t	c	846	-0.643	--	0.5203	0.932375
	Hippocampal_Volume	Cross-Sectional	rs12963825	18	34709484	DTNA	a	g	846	-1.544	--	0.1225	0.925111
	Hippocampal_Volume	Cross-Sectional	rs1480432	18	34727166	DTNA	t	g	846	-0.659	+-	0.51	0.932375
	Hippocampal_Volume	Cross-Sectional	rs45556134	18	34729425	DTNA	a	g	846	1.379	++	0.168	0.932375
	Hippocampal_Volume	Cross-Sectional	rs899828	18	34732688	DTNA	t	g	846	-0.565	--	0.5718	0.932375
	Hippocampal_Volume	Cross-Sectional	rs17556884	18	34736455	DTNA	t	c	846	0.731	+-	0.4649	0.932375
	Hippocampal_Volume	Cross-Sectional	rs1480428	18	34738732	DTNA	a	g	846	1.379	++	0.1678	0.932375
	Hippocampal_Volume	Cross-Sectional	rs12957349	18	34739291	DTNA	t	c	846	-0.109	+-	0.9136	0.9741
	Hippocampal_Volume	Cross-Sectional	rs12608110	18	34752198	DTNA	a	g	846	-0.082	+-	0.9346	0.9741
	Hippocampal_Volume	Cross-Sectional	rs7228547	18	34760039	DTNA	a	g	846	0.643	++	0.5203	0.932375
	Hippocampal_Volume	Cross-Sectional	rs8099437	18	34761448	DTNA	t	g	846	1.278	++	0.2013	0.932375
	Hippocampal_Volume	Cross-Sectional	rs72955132	18	34762382	DTNA	a	g	846	0.88	++	0.3788	0.932375
	Hippocampal_Volume	Cross-Sectional	rs1817452	18	34776629	DTNA	t	c	846	-0.069	+-	0.9447	0.9741
	Hippocampal_Volume	Cross-Sectional	rs56404226	18	34778060	DTNA	a	g	846	-0.505	+-	0.6138	0.932375
	Hippocampal_Volume	Cross-Sectional	rs72955175	18	34779045	DTNA	a	t	846	0.643	++	0.5203	0.932375
	Hippocampal_Volume	Cross-Sectional	rs12608251	18	34782906	DTNA	t	g	846	-0.688	--	0.4917	0.932375
	Hippocampal_Volume	Cross-Sectional	rs76880720	18	34791141	DTNA	a	c	846	-0.105	-+	0.9163	0.9741
	Hippocampal_Volume	Cross-Sectional	rs9989533	18	34793909	DTNA	t	c	846	0.577	++	0.5636	0.932375
	Hippocampal_Volume	Cross-Sectional	rs79500711	18	34794379	DTNA	a	g	518	1.587	?+	0.1125	0.925111
	Hippocampal_Volume	Cross-Sectional	rs138856611	18	34801684	DTNA	t	g	846	1.071	++	0.284	0.932375
	Hippocampal_Volume	Cross-Sectional	rs62097226	18	34804223	DTNA	a	t	328	-0.346	-?	0.7294	0.933905
	Hippocampal_Volume	Cross-Sectional	rs4458079	18	34806161	DTNA	t	c	846	-0.726	--	0.4676	0.932375
	Hippocampal_Volume	Cross-Sectional	rs8086358	18	34813672	DTNA	t	g	846	-0.64	+-	0.5224	0.932375
	Hippocampal_Volume	Cross-Sectional	rs72963047	18	34818804	DTNA	a	c	846	-2.047	--	0.04067	0.582624
	Hippocampal_Volume	Cross-Sectional	rs17557660	18	34831178	DTNA	a	t	846	-0.033	-+	0.9735	0.9741
	Hippocampal_Volume	Cross-Sectional	rs1790533	18	34831631	DTNA	a	g	846	-0.421	+-	0.6736	0.932375
	Hippocampal_Volume	Cross-Sectional	rs4799782	18	34841123	DTNA	a	g	846	-1.071	--	0.284	0.932375
	Hippocampal_Volume	Cross-Sectional	rs1786604	18	34846264	DTNA	a	g	846	0.938	++	0.3483	0.932375
	Hippocampal_Volume	Cross-Sectional	rs7233779	18	34863262	DTNA	a	g	846	-1.92	+-	0.05492	0.627003
	Hippocampal_Volume	Cross-Sectional	rs644982	18	34869793	DTNA	a	g	846	-0.505	--	0.6134	0.932375
	Hippocampal_Volume	Cross-Sectional	rs11659517	18	34870978	DTNA	a	t	846	0.055	+-	0.9559	0.9741
	Hippocampal_Volume	Cross-Sectional	rs524969	18	34872102	DTNA	a	t	846	0.768	-+	0.4425	0.932375
	Hippocampal_Volume	Cross-Sectional	rs637914	18	34876135	DTNA	a	t	846	0.426	-+	0.6703	0.932375
	Hippocampal_Volume	Cross-Sectional	rs9304141	18	34879143	DTNA	t	c	846	-1.082	--	0.2792	0.932375
	Hippocampal_Volume	Cross-Sectional	rs2288085	18	34879740	DTNA	a	g	846	-1.282	--	0.1997	0.932375
	Hippocampal_Volume	Cross-Sectional	rs17558116	18	34882719	DTNA	t	c	846	0.908	+-	0.364	0.932375
	Hippocampal_Volume	Cross-Sectional	rs10502637	18	34890006	DTNA	t	c	846	0.696	++	0.4866	0.932375
	Hippocampal_Volume	Cross-Sectional	rs149163416	18	34898841	DTNA	a	g	846	1.085	+-	0.2781	0.932375
	Hippocampal_Volume	Cross-Sectional	20:33413780	20	33413780	SNTA1	a	t	846	0.094	-+	0.9251	0.9741
	Hippocampal_Volume	Cross-Sectional	rs291683	20	33431611	SNTA1	t	c	846	-0.742	+-	0.4579	0.932375
	Hippocampal_Volume	Cross-Sectional	20:33433270	20	33433270	SNTA1	t	c	846	1.3	++	0.1937	0.932375
	Hippocampal_Volume	Cross-Sectional	rs6141396	20	33436147	SNTA1	a	c	328	-0.445	-?	0.6563	0.932375
	Hippocampal_Volume	Cross-Sectional	rs293721	20	33441633	SNTA1	t	c	846	-1.115	--	0.2651	0.932375
	Hippocampal_Volume	Longitudinal	rs111599092	3	49465346	DAG1	a	g	309	-0.708	+-	0.4787	0.987395
	Hippocampal_Volume	Longitudinal	rs73073015	3	49465733	DAG1	a	g	140	0.195	?+	0.8457	0.987395
	Hippocampal_Volume	Longitudinal	rs7611164	3	49471395	DAG1	t	g	309	0.606	++	0.5448	0.987395
	Hippocampal_Volume	Longitudinal	rs1568661	3	49483525	DAG1	a	g	309	0.705	-+	0.4811	0.987395
	Hippocampal_Volume	Longitudinal	rs7374731	3	49495661	DAG1	c	g	309	-1.673	-+	0.09438	0.987395
	Hippocampal_Volume	Longitudinal	rs3870338	3	49519618	DAG1	a	g	309	0.705	-+	0.4811	0.987395
	Hippocampal_Volume	Longitudinal	rs55935606	3	49528072	DAG1	a	g	309	0.278	+-	0.781	0.987395
	Hippocampal_Volume	Longitudinal	rs75153130	3	49530436	DAG1	a	c	309	-0.606	--	0.5448	0.987395
	Hippocampal_Volume	Longitudinal	rs13079082	3	49537375	DAG1	c	g	309	-0.083	+-	0.9336	0.987395
	Hippocampal_Volume	Longitudinal	rs4052546	3	49538116	DAG1	c	g	309	1.673	+-	0.09438	0.987395
	Hippocampal_Volume	Longitudinal	rs73074830	3	49539584	DAG1	a	c	309	0.308	-+	0.7578	0.987395
	Hippocampal_Volume	Longitudinal	rs114093899	3	49539955	DAG1	c	g	140	-1.068	?-	0.2855	0.987395
	Hippocampal_Volume	Longitudinal	rs9789109	18	26842291	AQP4	a	g	309	0.773	+-	0.4398	0.987395
	Hippocampal_Volume	Longitudinal	rs10164026	18	26842362	AQP4	a	c	309	0.603	-+	0.5468	0.987395
	Hippocampal_Volume	Longitudinal	rs4800270	18	26844933	AQP4	t	g	309	-1.018	--	0.3088	0.987395
	Hippocampal_Volume	Longitudinal	rs79668602	18	26845488	AQP4	a	g	309	-0.357	+-	0.7209	0.987395
	Hippocampal_Volume	Longitudinal	rs12458416	18	26847267	AQP4	c	g	309	-0.919	--	0.3582	0.987395
	Hippocampal_Volume	Longitudinal	rs12953446	18	26848521	AQP4	a	g	309	0.646	+-	0.5181	0.987395
	Hippocampal_Volume	Longitudinal	rs67461489	18	26848876	AQP4	t	c	169	-1.131	-?	0.2579	0.987395
	Hippocampal_Volume	Longitudinal	rs11661081	18	26850068	AQP4	a	c	309	-1.184	--	0.2365	0.987395
	Hippocampal_Volume	Longitudinal	rs3763043	18	26855854	AQP4	t	c	309	0.132	-+	0.8949	0.987395
	Hippocampal_Volume	Longitudinal	rs68006382	18	26856555	AQP4	a	g	309	0.354	+-	0.7237	0.987395
	Hippocampal_Volume	Longitudinal	rs335930	18	26856961	AQP4	a	c	309	-1.518	--	0.129	0.987395
	Hippocampal_Volume	Longitudinal	rs71353405	18	26857429	AQP4	t	c	169	1.081	+?	0.2799	0.987395
	Hippocampal_Volume	Longitudinal	rs162009	18	26864250	AQP4	a	g	309	0.707	++	0.4799	0.987395
	Hippocampal_Volume	Longitudinal	rs4800773	18	26865017	AQP4	a	g	309	0.246	+-	0.8058	0.987395
	Hippocampal_Volume	Longitudinal	rs3875089	18	26865469	AQP4	t	c	309	-0.478	-+	0.6328	0.987395
	Hippocampal_Volume	Longitudinal	rs72878787	18	26866517	AQP4	a	g	309	0.908	++	0.3641	0.987395
	Hippocampal_Volume	Longitudinal	rs162006	18	26866570	AQP4	t	c	309	0.23	+-	0.818	0.987395
	Hippocampal_Volume	Longitudinal	rs151244	18	26866755	AQP4	t	c	309	0.826	++	0.409	0.987395
	Hippocampal_Volume	Longitudinal	rs72878794	18	26866839	AQP4	t	c	309	0.859	-+	0.3906	0.987395
	Hippocampal_Volume	Longitudinal	rs9961118	18	26866901	AQP4	t	c	309	-1.581	--	0.1139	0.987395
	Hippocampal_Volume	Longitudinal	rs162004	18	26867972	AQP4	c	g	309	0.512	+-	0.6086	0.987395
	Hippocampal_Volume	Longitudinal	rs72878799	18	26868165	AQP4	a	g	309	1.049	+-	0.2941	0.987395
	Hippocampal_Volume	Longitudinal	rs11662318	18	26869056	AQP4	t	c	309	0.23	+-	0.8183	0.987395
	Hippocampal_Volume	Longitudinal	rs151246	18	26869139	AQP4	t	g	309	0.271	++	0.7866	0.987395
	Hippocampal_Volume	Longitudinal	rs491148	18	26869803	AQP4	a	g	309	-0.34	-+	0.7341	0.987395
	Hippocampal_Volume	Longitudinal	rs162002	18	26871015	AQP4	a	g	309	-1.338	--	0.1808	0.987395
	Hippocampal_Volume	Longitudinal	rs162001	18	26871481	AQP4	a	c	309	0.948	++	0.3432	0.987395
	Hippocampal_Volume	Longitudinal	rs3865411	18	26871684	AQP4	a	g	309	0.535	+-	0.5929	0.987395
	Hippocampal_Volume	Longitudinal	rs162000	18	26872471	AQP4	a	c	309	-0.042	+-	0.9662	0.987395
	Hippocampal_Volume	Longitudinal	rs12969503	18	26873564	AQP4	t	g	309	-0.661	-+	0.5087	0.987395
	Hippocampal_Volume	Longitudinal	rs8094228	18	26873767	AQP4	t	c	309	-0.028	+-	0.9778	0.987395
	Hippocampal_Volume	Longitudinal	rs480647	18	26874290	AQP4	t	c	309	-0.01	-+	0.9923	0.9923
	Hippocampal_Volume	Longitudinal	rs7234562	18	34483685	DTNA	t	c	309	-0.126	-+	0.9	0.987395
	Hippocampal_Volume	Longitudinal	rs79922046	18	34485536	DTNA	a	g	169	-0.813	-?	0.4165	0.987395
	Hippocampal_Volume	Longitudinal	rs9955950	18	34485672	DTNA	t	c	309	-1.373	--	0.1698	0.987395
	Hippocampal_Volume	Longitudinal	rs12957028	18	34485948	DTNA	a	g	169	0.554	+?	0.5794	0.987395
	Hippocampal_Volume	Longitudinal	rs72639491	18	34491438	DTNA	a	g	309	0.735	++	0.4625	0.987395
	Hippocampal_Volume	Longitudinal	rs62097347	18	34492032	DTNA	c	g	309	0.455	++	0.6493	0.987395
	Hippocampal_Volume	Longitudinal	rs9961251	18	34492344	DTNA	t	c	309	0.375	-+	0.7079	0.987395
	Hippocampal_Volume	Longitudinal	rs111846993	18	34494001	DTNA	t	c	169	0.205	+?	0.8372	0.987395
	Hippocampal_Volume	Longitudinal	rs4799769	18	34494577	DTNA	c	g	309	-0.074	+-	0.9411	0.987395
	Hippocampal_Volume	Longitudinal	rs8092794	18	34496273	DTNA	a	g	309	0.81	+-	0.418	0.987395
	Hippocampal_Volume	Longitudinal	rs7243528	18	34497055	DTNA	t	c	309	-0.782	-+	0.434	0.987395
	Hippocampal_Volume	Longitudinal	rs35839923	18	34497764	DTNA	a	g	309	-1.137	--	0.2556	0.987395
	Hippocampal_Volume	Longitudinal	rs62097349	18	34499519	DTNA	a	g	309	-0.296	--	0.7672	0.987395
	Hippocampal_Volume	Longitudinal	rs9965622	18	34502153	DTNA	t	c	309	0.347	++	0.7286	0.987395
	Hippocampal_Volume	Longitudinal	rs62098462	18	34504364	DTNA	t	c	309	0.314	-+	0.7532	0.987395
	Hippocampal_Volume	Longitudinal	rs75127284	18	34506592	DTNA	a	c	169	1.608	+?	0.1078	0.987395
	Hippocampal_Volume	Longitudinal	rs2439861	18	34507940	DTNA	a	g	309	-0.697	-+	0.4856	0.987395
	Hippocampal_Volume	Longitudinal	rs2509597	18	34528430	DTNA	a	t	309	0.646	++	0.518	0.987395
	Hippocampal_Volume	Longitudinal	rs71363449	18	34531997	DTNA	t	c	169	-0.208	-?	0.8349	0.987395
	Hippocampal_Volume	Longitudinal	rs2439853	18	34533937	DTNA	a	g	309	-0.738	--	0.4608	0.987395
	Hippocampal_Volume	Longitudinal	rs2439000	18	34536414	DTNA	c	g	309	0.083	-+	0.9337	0.987395
	Hippocampal_Volume	Longitudinal	rs1967583	18	34544573	DTNA	t	c	309	0.706	++	0.48	0.987395
	Hippocampal_Volume	Longitudinal	rs28856895	18	34555507	DTNA	a	g	309	-1.519	--	0.1288	0.987395
	Hippocampal_Volume	Longitudinal	rs77973497	18	34560529	DTNA	a	c	140	1.301	?+	0.1933	0.987395
	Hippocampal_Volume	Longitudinal	rs2579796	18	34569243	DTNA	a	g	309	-0.426	+-	0.6701	0.987395
	Hippocampal_Volume	Longitudinal	rs2579797	18	34571732	DTNA	t	g	309	-0.083	+-	0.9337	0.987395
	Hippocampal_Volume	Longitudinal	rs2685557	18	34576782	DTNA	t	c	309	-0.426	+-	0.6701	0.987395
	Hippocampal_Volume	Longitudinal	rs9958492	18	34577783	DTNA	t	c	169	-0.214	-?	0.8302	0.987395
	Hippocampal_Volume	Longitudinal	rs2579802	18	34579787	DTNA	a	c	309	-0.621	--	0.5344	0.987395
	Hippocampal_Volume	Longitudinal	rs74920018	18	34607557	DTNA	a	t	140	1.301	?+	0.1933	0.987395
	Hippocampal_Volume	Longitudinal	rs1439127	18	34607759	DTNA	a	t	169	0.97	+?	0.3318	0.987395
	Hippocampal_Volume	Longitudinal	rs12327368	18	34611361	DTNA	a	g	169	-0.214	-?	0.8302	0.987395
	Hippocampal_Volume	Longitudinal	rs62097188	18	34611412	DTNA	a	g	309	1.06	-+	0.2892	0.987395
	Hippocampal_Volume	Longitudinal	rs9807153	18	34635520	DTNA	a	t	309	-0.165	+-	0.8691	0.987395
	Hippocampal_Volume	Longitudinal	rs2730126	18	34635939	DTNA	a	c	309	-0.713	--	0.4756	0.987395
	Hippocampal_Volume	Longitudinal	rs1659526	18	34644451	DTNA	a	g	309	0.137	+-	0.8912	0.987395
	Hippocampal_Volume	Longitudinal	rs1240974	18	34650949	DTNA	t	c	309	-0.083	+-	0.9337	0.987395
	Hippocampal_Volume	Longitudinal	rs55869511	18	34651262	DTNA	a	c	169	0.514	+?	0.6074	0.987395
	Hippocampal_Volume	Longitudinal	rs12955208	18	34656737	DTNA	a	g	309	0.682	-+	0.495	0.987395
	Hippocampal_Volume	Longitudinal	rs72953203	18	34660068	DTNA	a	g	309	-0.27	+-	0.7874	0.987395
	Hippocampal_Volume	Longitudinal	rs9946070	18	34665505	DTNA	a	g	309	-0.732	--	0.4643	0.987395
	Hippocampal_Volume	Longitudinal	rs72953211	18	34673381	DTNA	a	c	309	-0.354	-+	0.723	0.987395
	Hippocampal_Volume	Longitudinal	rs55971592	18	34697328	DTNA	a	g	309	-1.682	--	0.09257	0.987395
	Hippocampal_Volume	Longitudinal	rs78837792	18	34703359	DTNA	t	c	309	-0.144	-+	0.8854	0.987395
	Hippocampal_Volume	Longitudinal	rs11663468	18	34707936	DTNA	t	c	309	-0.025	+-	0.9798	0.987395
	Hippocampal_Volume	Longitudinal	rs12963825	18	34709484	DTNA	a	g	169	-0.527	-?	0.5985	0.987395
	Hippocampal_Volume	Longitudinal	rs1480432	18	34727166	DTNA	t	g	309	-0.279	+-	0.7804	0.987395
	Hippocampal_Volume	Longitudinal	rs45556134	18	34729425	DTNA	a	g	140	1.037	?+	0.2998	0.987395
	Hippocampal_Volume	Longitudinal	rs17556884	18	34736455	DTNA	t	c	169	0.214	+?	0.8302	0.987395
	Hippocampal_Volume	Longitudinal	rs1480428	18	34738732	DTNA	a	g	309	0.688	++	0.4914	0.987395
	Hippocampal_Volume	Longitudinal	rs12957349	18	34739291	DTNA	t	c	309	0.551	-+	0.5816	0.987395
	Hippocampal_Volume	Longitudinal	rs12608110	18	34752198	DTNA	a	g	309	-0.2	-+	0.8412	0.987395
	Hippocampal_Volume	Longitudinal	rs7228547	18	34760039	DTNA	a	g	309	0.025	-+	0.9798	0.987395
	Hippocampal_Volume	Longitudinal	rs8099437	18	34761448	DTNA	t	g	309	0.688	++	0.4914	0.987395
	Hippocampal_Volume	Longitudinal	rs72955132	18	34762382	DTNA	a	g	169	0.214	+?	0.8302	0.987395
	Hippocampal_Volume	Longitudinal	rs1817452	18	34776629	DTNA	t	c	309	0.587	-+	0.5569	0.987395
	Hippocampal_Volume	Longitudinal	rs56404226	18	34778060	DTNA	a	g	309	0.12	+-	0.9048	0.987395
	Hippocampal_Volume	Longitudinal	rs72955175	18	34779045	DTNA	a	t	309	0.025	-+	0.9798	0.987395
	Hippocampal_Volume	Longitudinal	rs12608251	18	34782906	DTNA	t	g	309	-0.942	--	0.3462	0.987395
	Hippocampal_Volume	Longitudinal	rs76880720	18	34791141	DTNA	a	c	309	-1.117	--	0.2641	0.987395
	Hippocampal_Volume	Longitudinal	rs9989533	18	34793909	DTNA	t	c	309	-0.441	-+	0.6589	0.987395
	Hippocampal_Volume	Longitudinal	rs79500711	18	34794379	DTNA	a	g	140	-1.122	?-	0.262	0.987395
	Hippocampal_Volume	Longitudinal	rs138856611	18	34801684	DTNA	t	g	140	-0.297	?-	0.7666	0.987395
	Hippocampal_Volume	Longitudinal	rs62097226	18	34804223	DTNA	a	t	169	1.246	+?	0.2127	0.987395
	Hippocampal_Volume	Longitudinal	rs4458079	18	34806161	DTNA	t	c	309	-0.731	--	0.465	0.987395
	Hippocampal_Volume	Longitudinal	rs8086358	18	34813672	DTNA	t	g	309	-0.666	--	0.5057	0.987395
	Hippocampal_Volume	Longitudinal	rs72963047	18	34818804	DTNA	a	c	309	0.656	++	0.512	0.987395
	Hippocampal_Volume	Longitudinal	rs17557660	18	34831178	DTNA	a	t	140	1.375	?+	0.169	0.987395
	Hippocampal_Volume	Longitudinal	rs1790533	18	34831631	DTNA	a	g	309	-0.41	--	0.6815	0.987395
	Hippocampal_Volume	Longitudinal	rs4799782	18	34841123	DTNA	a	g	140	0.297	?+	0.7666	0.987395
	Hippocampal_Volume	Longitudinal	rs1786604	18	34846264	DTNA	a	g	309	0.025	-+	0.9798	0.987395
	Hippocampal_Volume	Longitudinal	rs7233779	18	34863262	DTNA	a	g	309	0.515	-+	0.6064	0.987395
	Hippocampal_Volume	Longitudinal	rs644982	18	34869793	DTNA	a	g	309	-0.87	--	0.3841	0.987395
	Hippocampal_Volume	Longitudinal	rs11659517	18	34870978	DTNA	a	t	309	0.977	++	0.3284	0.987395
	Hippocampal_Volume	Longitudinal	rs524969	18	34872102	DTNA	a	t	309	0.505	+-	0.6133	0.987395
	Hippocampal_Volume	Longitudinal	rs637914	18	34876135	DTNA	a	t	309	1.201	++	0.2298	0.987395
	Hippocampal_Volume	Longitudinal	rs9304141	18	34879143	DTNA	t	c	309	-0.796	--	0.4262	0.987395
	Hippocampal_Volume	Longitudinal	rs2288085	18	34879740	DTNA	a	g	309	-1.056	--	0.2912	0.987395
	Hippocampal_Volume	Longitudinal	rs17558116	18	34882719	DTNA	t	c	309	2.005	++	0.04499	0.987395
	Hippocampal_Volume	Longitudinal	rs10502637	18	34890006	DTNA	t	c	309	-0.572	--	0.5674	0.987395
	Hippocampal_Volume	Longitudinal	rs149163416	18	34898841	DTNA	a	g	309	-0.15	-+	0.8807	0.987395
	Hippocampal_Volume	Longitudinal	20:33413780	20	33413780	SNTA1	a	t	309	-1.149	--	0.2505	0.987395
	Hippocampal_Volume	Longitudinal	rs291683	20	33431611	SNTA1	t	c	309	0.429	++	0.6681	0.987395
	Hippocampal_Volume	Longitudinal	20:33433270	20	33433270	SNTA1	t	c	309	-0.41	-+	0.682	0.987395
	Hippocampal_Volume	Longitudinal	rs6141396	20	33436147	SNTA1	a	c	169	-0.271	-?	0.7861	0.987395
	Hippocampal_Volume	Longitudinal	rs293721	20	33441633	SNTA1	t	c	169	-0.076	-?	0.9395	0.987395
	PACC	Cross-Sectional	rs111599092	3	49465346	DAG1	a	g	964	-0.351	+-	0.7258	0.961655
	PACC	Cross-Sectional	rs73073015	3	49465733	DAG1	a	g	964	0.266	-+	0.7903	0.961655
	PACC	Cross-Sectional	rs7611164	3	49471395	DAG1	t	g	964	0.67	-+	0.5029	0.957414
	PACC	Cross-Sectional	rs1568661	3	49483525	DAG1	a	g	964	-0.398	-+	0.6907	0.961655
	PACC	Cross-Sectional	rs7374731	3	49495661	DAG1	c	g	964	0.02	-+	0.9838	0.991034
	PACC	Cross-Sectional	rs73074811	3	49516098	DAG1	a	t	964	0.813	++	0.416	0.957414
	PACC	Cross-Sectional	rs3870338	3	49519618	DAG1	a	g	964	-0.299	-+	0.765	0.961655
	PACC	Cross-Sectional	rs55935606	3	49528072	DAG1	a	g	964	-0.231	+-	0.8173	0.961655
	PACC	Cross-Sectional	rs75153130	3	49530436	DAG1	a	c	964	-0.67	+-	0.5029	0.957414
	PACC	Cross-Sectional	rs13079082	3	49537375	DAG1	c	g	964	1.67	++	0.09495	0.743653
	PACC	Cross-Sectional	rs4052546	3	49538116	DAG1	c	g	964	-0.02	+-	0.9838	0.991034
	PACC	Cross-Sectional	rs73074830	3	49539584	DAG1	a	c	964	0.226	-+	0.8212	0.961655
	PACC	Cross-Sectional	rs114093899	3	49539955	DAG1	c	g	562	-0.156	?-	0.8761	0.961655
	PACC	Cross-Sectional	rs9789109	18	26842291	AQP4	a	g	964	0.042	+-	0.9669	0.991034
	PACC	Cross-Sectional	rs10164026	18	26842362	AQP4	a	c	964	0.131	+-	0.8961	0.961655
	PACC	Cross-Sectional	rs4800270	18	26844933	AQP4	t	g	964	-1.546	-+	0.1222	0.743653
	PACC	Cross-Sectional	rs79668602	18	26845488	AQP4	a	g	964	-0.311	+-	0.7559	0.961655
	PACC	Cross-Sectional	rs12458416	18	26847267	AQP4	c	g	964	-0.318	+-	0.7504	0.961655
	PACC	Cross-Sectional	rs12953446	18	26848521	AQP4	a	g	964	0.231	-+	0.8171	0.961655
	PACC	Cross-Sectional	rs67461489	18	26848876	AQP4	t	c	964	0.222	-+	0.8241	0.961655
	PACC	Cross-Sectional	rs11661081	18	26850068	AQP4	a	c	964	1.898	++	0.05763	0.743653
	PACC	Cross-Sectional	rs3763043	18	26855854	AQP4	t	c	964	-1.799	--	0.07198	0.743653
	PACC	Cross-Sectional	rs68006382	18	26856555	AQP4	a	g	964	0.875	++	0.3814	0.957414
	PACC	Cross-Sectional	rs335930	18	26856961	AQP4	a	c	964	-1.116	--	0.2643	0.804647
	PACC	Cross-Sectional	rs71353405	18	26857429	AQP4	t	c	964	0.553	++	0.5801	0.957414
	PACC	Cross-Sectional	rs162009	18	26864250	AQP4	a	g	964	1.451	++	0.1469	0.743653
	PACC	Cross-Sectional	rs4800773	18	26865017	AQP4	a	g	964	-1.36	--	0.1737	0.743653
	PACC	Cross-Sectional	rs3875089	18	26865469	AQP4	t	c	964	-0.463	-+	0.6435	0.957414
	PACC	Cross-Sectional	rs72878787	18	26866517	AQP4	a	g	964	-1.639	-+	0.1013	0.743653
	PACC	Cross-Sectional	rs162006	18	26866570	AQP4	t	c	964	0.689	++	0.4911	0.957414
	PACC	Cross-Sectional	rs151244	18	26866755	AQP4	t	c	964	-2.304	--	0.02123	0.743653
	PACC	Cross-Sectional	rs72878794	18	26866839	AQP4	t	c	964	-0.16	+-	0.8726	0.961655
	PACC	Cross-Sectional	rs9961118	18	26866901	AQP4	t	c	964	-0.067	+-	0.9463	0.989642
	PACC	Cross-Sectional	rs162004	18	26867972	AQP4	c	g	964	0.573	++	0.5669	0.957414
	PACC	Cross-Sectional	rs72878799	18	26868165	AQP4	a	g	964	0.293	-+	0.7696	0.961655
	PACC	Cross-Sectional	rs11662318	18	26869056	AQP4	t	c	964	0.51	++	0.6103	0.957414
	PACC	Cross-Sectional	rs151246	18	26869139	AQP4	t	g	964	-0.802	--	0.4228	0.957414
	PACC	Cross-Sectional	rs491148	18	26869803	AQP4	a	g	964	-0.586	--	0.5578	0.957414
	PACC	Cross-Sectional	rs162002	18	26871015	AQP4	a	g	964	-2.143	--	0.03208	0.743653
	PACC	Cross-Sectional	rs162001	18	26871481	AQP4	a	c	964	0.458	-+	0.6467	0.957414
	PACC	Cross-Sectional	rs3865411	18	26871684	AQP4	a	g	964	0.329	-+	0.7418	0.961655
	PACC	Cross-Sectional	rs162000	18	26872471	AQP4	a	c	964	-0.384	+-	0.7007	0.961655
	PACC	Cross-Sectional	rs12969503	18	26873564	AQP4	t	g	964	-1.89	--	0.05871	0.743653
	PACC	Cross-Sectional	rs8094228	18	26873767	AQP4	t	c	964	1.957	++	0.05034	0.743653
	PACC	Cross-Sectional	rs480647	18	26874290	AQP4	t	c	964	-2.55	--	0.01077	0.737745
	PACC	Cross-Sectional	rs10502478	18	26874616	AQP4	a	c	402	-1.683	-?	0.09242	0.743653
	PACC	Cross-Sectional	rs7234562	18	34483685	DTNA	t	c	964	-0.15	-+	0.8806	0.961655
	PACC	Cross-Sectional	rs79922046	18	34485536	DTNA	a	g	964	0.631	-+	0.5283	0.957414
	PACC	Cross-Sectional	rs9955950	18	34485672	DTNA	t	c	964	1.742	-+	0.08156	0.743653
	PACC	Cross-Sectional	rs12957028	18	34485948	DTNA	a	g	964	-0.936	--	0.3491	0.947885
	PACC	Cross-Sectional	rs72639491	18	34491438	DTNA	a	g	964	0.565	-+	0.5719	0.957414
	PACC	Cross-Sectional	rs62097347	18	34492032	DTNA	c	g	964	-2.043	--	0.04102	0.743653
	PACC	Cross-Sectional	rs9961251	18	34492344	DTNA	t	c	964	0.478	++	0.6325	0.957414
	PACC	Cross-Sectional	rs111846993	18	34494001	DTNA	t	c	964	-1.169	--	0.2424	0.804647
	PACC	Cross-Sectional	rs4799769	18	34494577	DTNA	c	g	964	-1.029	+-	0.3033	0.865669
	PACC	Cross-Sectional	rs8092794	18	34496273	DTNA	a	g	964	0.119	-+	0.9055	0.961655
	PACC	Cross-Sectional	rs7243528	18	34497055	DTNA	t	c	964	0.144	++	0.8854	0.961655
	PACC	Cross-Sectional	rs79972565	18	34497194	DTNA	t	g	964	-1.165	--	0.2441	0.804647
	PACC	Cross-Sectional	rs35839923	18	34497764	DTNA	a	g	964	-0.903	--	0.3667	0.947885
	PACC	Cross-Sectional	rs62097349	18	34499519	DTNA	a	g	964	0.713	++	0.4761	0.957414
	PACC	Cross-Sectional	rs9965622	18	34502153	DTNA	t	c	964	1.231	++	0.2183	0.804647
	PACC	Cross-Sectional	rs62098462	18	34504364	DTNA	t	c	964	1.548	-+	0.1216	0.743653
	PACC	Cross-Sectional	rs75127284	18	34506592	DTNA	a	c	402	1.365	+?	0.1721	0.743653
	PACC	Cross-Sectional	rs2439861	18	34507940	DTNA	a	g	964	0.74	-+	0.4591	0.957414
	PACC	Cross-Sectional	rs35982920	18	34516411	DTNA	a	g	964	1.279	++	0.2007	0.765297
	PACC	Cross-Sectional	rs2509597	18	34528430	DTNA	a	t	964	-0.851	--	0.3948	0.957414
	PACC	Cross-Sectional	rs71363449	18	34531997	DTNA	t	c	964	-0.913	+-	0.361	0.947885
	PACC	Cross-Sectional	rs2439853	18	34533937	DTNA	a	g	964	0.434	+-	0.6639	0.957414
	PACC	Cross-Sectional	rs2439000	18	34536414	DTNA	c	g	964	-0.444	-+	0.6568	0.957414
	PACC	Cross-Sectional	rs11875892	18	34544032	DTNA	a	g	964	1.281	++	0.2003	0.765297
	PACC	Cross-Sectional	rs1967583	18	34544573	DTNA	t	c	964	0.625	-+	0.5322	0.957414
	PACC	Cross-Sectional	rs28856895	18	34555507	DTNA	a	g	964	-0.381	--	0.7029	0.961655
	PACC	Cross-Sectional	rs77973497	18	34560529	DTNA	a	c	964	0.233	-+	0.8154	0.961655
	PACC	Cross-Sectional	rs2579796	18	34569243	DTNA	a	g	964	1.372	+-	0.17	0.743653
	PACC	Cross-Sectional	rs2579797	18	34571732	DTNA	t	g	964	-0.544	+-	0.5864	0.957414
	PACC	Cross-Sectional	rs2685557	18	34576782	DTNA	t	c	964	1.399	+-	0.1618	0.743653
	PACC	Cross-Sectional	rs9958492	18	34577783	DTNA	t	c	964	-0.517	+-	0.605	0.957414
	PACC	Cross-Sectional	rs2579802	18	34579787	DTNA	a	c	964	-1.063	+-	0.2878	0.838906
	PACC	Cross-Sectional	rs74920018	18	34607557	DTNA	a	t	964	0.233	-+	0.8154	0.961655
	PACC	Cross-Sectional	rs1439127	18	34607759	DTNA	a	t	964	-0.192	+-	0.8479	0.961655
	PACC	Cross-Sectional	rs12327368	18	34611361	DTNA	a	g	964	-0.517	+-	0.605	0.957414
	PACC	Cross-Sectional	rs62097188	18	34611412	DTNA	a	g	964	1.015	++	0.3103	0.867573
	PACC	Cross-Sectional	rs9807153	18	34635520	DTNA	a	t	964	-0.773	--	0.4396	0.957414
	PACC	Cross-Sectional	rs2730126	18	34635939	DTNA	a	c	964	-0.241	+-	0.8097	0.961655
	PACC	Cross-Sectional	rs1659526	18	34644451	DTNA	a	g	964	-1.138	+-	0.255	0.804647
	PACC	Cross-Sectional	rs17642885	18	34649976	DTNA	t	c	964	-0.035	--	0.9725	0.991034
	PACC	Cross-Sectional	rs1240974	18	34650949	DTNA	t	c	964	-0.544	+-	0.5864	0.957414
	PACC	Cross-Sectional	rs55869511	18	34651262	DTNA	a	c	964	-0.437	+-	0.6618	0.957414
	PACC	Cross-Sectional	rs12955208	18	34656737	DTNA	a	g	964	0.166	-+	0.8682	0.961655
	PACC	Cross-Sectional	rs72953203	18	34660068	DTNA	a	g	964	-1.078	--	0.2812	0.837487
	PACC	Cross-Sectional	rs9946070	18	34665505	DTNA	a	g	964	0.227	+-	0.8203	0.961655
	PACC	Cross-Sectional	rs72953211	18	34673381	DTNA	a	c	964	0.67	-+	0.5027	0.957414
	PACC	Cross-Sectional	rs55971592	18	34697328	DTNA	a	g	964	-1.614	--	0.1064	0.743653
	PACC	Cross-Sectional	rs78837792	18	34703359	DTNA	t	c	964	0.109	-+	0.9132	0.962372
	PACC	Cross-Sectional	rs11663468	18	34707936	DTNA	t	c	964	-0.123	+-	0.9025	0.961655
	PACC	Cross-Sectional	rs12963825	18	34709484	DTNA	a	g	964	-0.388	+-	0.6978	0.961655
	PACC	Cross-Sectional	rs1480432	18	34727166	DTNA	t	g	964	1.278	+-	0.2011	0.765297
	PACC	Cross-Sectional	rs45556134	18	34729425	DTNA	a	g	964	1.382	++	0.1668	0.743653
	PACC	Cross-Sectional	rs899828	18	34732688	DTNA	t	g	964	-1.404	--	0.1605	0.743653
	PACC	Cross-Sectional	rs17556884	18	34736455	DTNA	t	c	964	0.003	-+	0.9977	0.9977
	PACC	Cross-Sectional	rs1480428	18	34738732	DTNA	a	g	964	-0.528	-+	0.5972	0.957414
	PACC	Cross-Sectional	rs12957349	18	34739291	DTNA	t	c	964	1.155	++	0.2479	0.804647
	PACC	Cross-Sectional	rs12608110	18	34752198	DTNA	a	g	964	-0.48	-+	0.631	0.957414
	PACC	Cross-Sectional	rs7228547	18	34760039	DTNA	a	g	964	0.123	-+	0.9025	0.961655
	PACC	Cross-Sectional	rs8099437	18	34761448	DTNA	t	g	964	-0.905	-+	0.3653	0.947885
	PACC	Cross-Sectional	rs72955132	18	34762382	DTNA	a	g	964	0.442	-+	0.6587	0.957414
	PACC	Cross-Sectional	rs1817452	18	34776629	DTNA	t	c	964	1.311	++	0.1899	0.765297
	PACC	Cross-Sectional	rs56404226	18	34778060	DTNA	a	g	964	-0.664	+-	0.5066	0.957414
	PACC	Cross-Sectional	rs72955175	18	34779045	DTNA	a	t	964	0.123	-+	0.9025	0.961655
	PACC	Cross-Sectional	rs12608251	18	34782906	DTNA	t	g	964	1.364	+-	0.1725	0.743653
	PACC	Cross-Sectional	rs76880720	18	34791141	DTNA	a	c	964	-1.443	--	0.149	0.743653
	PACC	Cross-Sectional	rs9989533	18	34793909	DTNA	t	c	964	1.118	++	0.2635	0.804647
	PACC	Cross-Sectional	rs79500711	18	34794379	DTNA	a	g	964	-0.509	+-	0.6109	0.957414
	PACC	Cross-Sectional	rs138856611	18	34801684	DTNA	t	g	964	1.198	+-	0.2309	0.804647
	PACC	Cross-Sectional	rs62097226	18	34804223	DTNA	a	t	402	1.419	+?	0.1559	0.743653
	PACC	Cross-Sectional	rs4458079	18	34806161	DTNA	t	c	964	1.579	++	0.1143	0.743653
	PACC	Cross-Sectional	rs8086358	18	34813672	DTNA	t	g	964	0.624	+-	0.5328	0.957414
	PACC	Cross-Sectional	rs72963047	18	34818804	DTNA	a	c	964	1.72	++	0.08541	0.743653
	PACC	Cross-Sectional	rs17557660	18	34831178	DTNA	a	t	964	-0.375	--	0.7079	0.961655
	PACC	Cross-Sectional	rs1790533	18	34831631	DTNA	a	g	964	1.75	++	0.08008	0.743653
	PACC	Cross-Sectional	rs4799782	18	34841123	DTNA	a	g	964	-1.198	-+	0.2309	0.804647
	PACC	Cross-Sectional	rs1786604	18	34846264	DTNA	a	g	964	-0.138	-+	0.8903	0.961655
	PACC	Cross-Sectional	rs7233779	18	34863262	DTNA	a	g	964	0.454	-+	0.6501	0.957414
	PACC	Cross-Sectional	rs644982	18	34869793	DTNA	a	g	964	-0.547	--	0.5844	0.957414
	PACC	Cross-Sectional	rs11659517	18	34870978	DTNA	a	t	964	2.094	++	0.03629	0.743653
	PACC	Cross-Sectional	rs524969	18	34872102	DTNA	a	t	964	-1.652	--	0.09845	0.743653
	PACC	Cross-Sectional	rs637914	18	34876135	DTNA	a	t	964	0.051	+-	0.9596	0.991034
	PACC	Cross-Sectional	rs9304141	18	34879143	DTNA	t	c	964	-0.757	--	0.4493	0.957414
	PACC	Cross-Sectional	rs2288085	18	34879740	DTNA	a	g	964	-0.536	--	0.592	0.957414
	PACC	Cross-Sectional	rs17558116	18	34882719	DTNA	t	c	964	1.625	++	0.1043	0.743653
	PACC	Cross-Sectional	rs10502637	18	34890006	DTNA	t	c	964	2.911	++	0.003607	0.494159
	PACC	Cross-Sectional	rs149163416	18	34898841	DTNA	a	g	964	0.293	+-	0.7692	0.961655
	PACC	Cross-Sectional	20:33413780	20	33413780	SNTA1	a	t	964	0.347	-+	0.7285	0.961655
	PACC	Cross-Sectional	rs291683	20	33431611	SNTA1	t	c	964	-0.61	-+	0.5418	0.957414
	PACC	Cross-Sectional	20:33433270	20	33433270	SNTA1	t	c	964	0.767	-+	0.443	0.957414
	PACC	Cross-Sectional	rs6141396	20	33436147	SNTA1	a	c	402	0.624	+?	0.5327	0.957414
	PACC	Cross-Sectional	rs293721	20	33441633	SNTA1	t	c	964	-0.84	+-	0.4009	0.957414
	PACC	Longitudinal	rs111599092	3	49465346	DAG1	a	g	690	0.034	+-	0.973	0.9909
	PACC	Longitudinal	rs73073015	3	49465733	DAG1	a	g	425	0.961	?+	0.3366	0.9909
	PACC	Longitudinal	rs7611164	3	49471395	DAG1	t	g	690	0.547	-+	0.5843	0.9909
	PACC	Longitudinal	rs1568661	3	49483525	DAG1	a	g	690	0.355	++	0.7227	0.9909
	PACC	Longitudinal	rs7374731	3	49495661	DAG1	c	g	690	-2.197	--	0.028	0.9909
	PACC	Longitudinal	rs73074811	3	49516098	DAG1	a	t	690	0.204	-+	0.8385	0.9909
	PACC	Longitudinal	rs3870338	3	49519618	DAG1	a	g	690	0.304	++	0.761	0.9909
	PACC	Longitudinal	rs55935606	3	49528072	DAG1	a	g	690	0.163	-+	0.8707	0.9909
	PACC	Longitudinal	rs75153130	3	49530436	DAG1	a	c	690	-0.547	+-	0.5843	0.9909
	PACC	Longitudinal	rs13079082	3	49537375	DAG1	c	g	690	-0.252	-+	0.8014	0.9909
	PACC	Longitudinal	rs4052546	3	49538116	DAG1	c	g	690	2.197	++	0.028	0.9909
	PACC	Longitudinal	rs73074830	3	49539584	DAG1	a	c	690	-0.062	--	0.9505	0.9909
	PACC	Longitudinal	rs114093899	3	49539955	DAG1	c	g	425	1.095	?+	0.2734	0.9909
	PACC	Longitudinal	rs9789109	18	26842291	AQP4	a	g	690	1.158	++	0.2468	0.9909
	PACC	Longitudinal	rs10164026	18	26842362	AQP4	a	c	690	-0.453	-+	0.6505	0.9909
	PACC	Longitudinal	rs4800270	18	26844933	AQP4	t	g	690	-1.047	--	0.2952	0.9909
	PACC	Longitudinal	rs79668602	18	26845488	AQP4	a	g	690	1.393	++	0.1637	0.9909
	PACC	Longitudinal	rs12458416	18	26847267	AQP4	c	g	690	-0.034	-+	0.9728	0.9909
	PACC	Longitudinal	rs12953446	18	26848521	AQP4	a	g	690	1.008	++	0.3137	0.9909
	PACC	Longitudinal	rs67461489	18	26848876	AQP4	t	c	690	-1.363	--	0.1727	0.9909
	PACC	Longitudinal	rs11661081	18	26850068	AQP4	a	c	690	-1.171	--	0.2414	0.9909
	PACC	Longitudinal	rs3763043	18	26855854	AQP4	t	c	690	0.672	++	0.5015	0.9909
	PACC	Longitudinal	rs68006382	18	26856555	AQP4	a	g	690	-1.441	--	0.1496	0.9909
	PACC	Longitudinal	rs335930	18	26856961	AQP4	a	c	690	-1.424	--	0.1544	0.9909
	PACC	Longitudinal	rs71353405	18	26857429	AQP4	t	c	690	1.227	++	0.22	0.9909
	PACC	Longitudinal	rs162009	18	26864250	AQP4	a	g	690	2.245	++	0.02477	0.9909
	PACC	Longitudinal	rs4800773	18	26865017	AQP4	a	g	690	-0.089	-+	0.9293	0.9909
	PACC	Longitudinal	rs3875089	18	26865469	AQP4	t	c	690	-0.71	--	0.4779	0.9909
	PACC	Longitudinal	rs72878787	18	26866517	AQP4	a	g	690	0.773	++	0.4397	0.9909
	PACC	Longitudinal	rs162006	18	26866570	AQP4	t	c	690	0.867	++	0.3861	0.9909
	PACC	Longitudinal	rs151244	18	26866755	AQP4	t	c	690	1.494	-+	0.1351	0.9909
	PACC	Longitudinal	rs72878794	18	26866839	AQP4	t	c	690	-0.011	-+	0.9909	0.9909
	PACC	Longitudinal	rs9961118	18	26866901	AQP4	t	c	690	0.288	-+	0.7734	0.9909
	PACC	Longitudinal	rs162004	18	26867972	AQP4	c	g	690	0.134	+-	0.8931	0.9909
	PACC	Longitudinal	rs72878799	18	26868165	AQP4	a	g	690	0.226	+-	0.8208	0.9909
	PACC	Longitudinal	rs11662318	18	26869056	AQP4	t	c	690	0.307	-+	0.7592	0.9909
	PACC	Longitudinal	rs151246	18	26869139	AQP4	t	g	690	0.961	++	0.3365	0.9909
	PACC	Longitudinal	rs491148	18	26869803	AQP4	a	g	690	0.636	++	0.5248	0.9909
	PACC	Longitudinal	rs162002	18	26871015	AQP4	a	g	690	0.18	-+	0.8574	0.9909
	PACC	Longitudinal	rs162001	18	26871481	AQP4	a	c	690	0.177	+-	0.8595	0.9909
	PACC	Longitudinal	rs3865411	18	26871684	AQP4	a	g	690	0.586	++	0.5581	0.9909
	PACC	Longitudinal	rs162000	18	26872471	AQP4	a	c	690	-0.014	-+	0.9891	0.9909
	PACC	Longitudinal	rs12969503	18	26873564	AQP4	t	g	690	1.293	++	0.196	0.9909
	PACC	Longitudinal	rs8094228	18	26873767	AQP4	t	c	690	-1.289	+-	0.1975	0.9909
	PACC	Longitudinal	rs480647	18	26874290	AQP4	t	c	690	-0.734	-+	0.4628	0.9909
	PACC	Longitudinal	rs7234562	18	34483685	DTNA	t	c	690	-0.246	-+	0.806	0.9909
	PACC	Longitudinal	rs79922046	18	34485536	DTNA	a	g	690	-0.02	-+	0.9837	0.9909
	PACC	Longitudinal	rs9955950	18	34485672	DTNA	t	c	690	-1.596	+-	0.1106	0.9909
	PACC	Longitudinal	rs12957028	18	34485948	DTNA	a	g	690	0.361	-+	0.7182	0.9909
	PACC	Longitudinal	rs72639491	18	34491438	DTNA	a	g	690	-0.508	-+	0.6118	0.9909
	PACC	Longitudinal	rs62097347	18	34492032	DTNA	c	g	690	0.617	-+	0.5375	0.9909
	PACC	Longitudinal	rs9961251	18	34492344	DTNA	t	c	690	1.257	-+	0.2086	0.9909
	PACC	Longitudinal	rs111846993	18	34494001	DTNA	t	c	690	-0.712	--	0.4763	0.9909
	PACC	Longitudinal	rs4799769	18	34494577	DTNA	c	g	690	1.147	++	0.2514	0.9909
	PACC	Longitudinal	rs8092794	18	34496273	DTNA	a	g	690	-1.995	--	0.04602	0.9909
	PACC	Longitudinal	rs7243528	18	34497055	DTNA	t	c	690	1.055	+-	0.2916	0.9909
	PACC	Longitudinal	rs79972565	18	34497194	DTNA	t	g	265	1.4	+?	0.1614	0.9909
	PACC	Longitudinal	rs35839923	18	34497764	DTNA	a	g	690	0.313	++	0.7542	0.9909
	PACC	Longitudinal	rs62097349	18	34499519	DTNA	a	g	690	0.729	+-	0.466	0.9909
	PACC	Longitudinal	rs9965622	18	34502153	DTNA	t	c	690	-1.098	--	0.2721	0.9909
	PACC	Longitudinal	rs62098462	18	34504364	DTNA	t	c	690	0.287	+-	0.7744	0.9909
	PACC	Longitudinal	rs75127284	18	34506592	DTNA	a	c	265	-1.917	-?	0.05522	0.9909
	PACC	Longitudinal	rs2439861	18	34507940	DTNA	a	g	690	0.6	+-	0.5482	0.9909
	PACC	Longitudinal	rs35982920	18	34516411	DTNA	a	g	690	-1.141	--	0.2538	0.9909
	PACC	Longitudinal	rs2509597	18	34528430	DTNA	a	t	690	-0.063	-+	0.9497	0.9909
	PACC	Longitudinal	rs71363449	18	34531997	DTNA	t	c	265	-0.235	-?	0.8144	0.9909
	PACC	Longitudinal	rs2439853	18	34533937	DTNA	a	g	690	-0.204	+-	0.8387	0.9909
	PACC	Longitudinal	rs2439000	18	34536414	DTNA	c	g	690	-0.085	+-	0.9322	0.9909
	PACC	Longitudinal	rs11875892	18	34544032	DTNA	a	g	690	-1.141	--	0.2538	0.9909
	PACC	Longitudinal	rs1967583	18	34544573	DTNA	t	c	690	-0.543	+-	0.5873	0.9909
	PACC	Longitudinal	rs28856895	18	34555507	DTNA	a	g	690	-1.107	--	0.2685	0.9909
	PACC	Longitudinal	rs77973497	18	34560529	DTNA	a	c	690	-0.457	+-	0.6479	0.9909
	PACC	Longitudinal	rs2579796	18	34569243	DTNA	a	g	690	-0.288	--	0.773	0.9909
	PACC	Longitudinal	rs2579797	18	34571732	DTNA	t	g	690	0.085	-+	0.9322	0.9909
	PACC	Longitudinal	rs2685557	18	34576782	DTNA	t	c	690	-0.288	--	0.773	0.9909
	PACC	Longitudinal	rs9958492	18	34577783	DTNA	t	c	265	-0.404	-?	0.6863	0.9909
	PACC	Longitudinal	rs2579802	18	34579787	DTNA	a	c	690	0.369	-+	0.7123	0.9909
	PACC	Longitudinal	rs74920018	18	34607557	DTNA	a	t	690	-0.457	+-	0.6479	0.9909
	PACC	Longitudinal	rs1439127	18	34607759	DTNA	a	t	690	0.474	+-	0.6352	0.9909
	PACC	Longitudinal	rs12327368	18	34611361	DTNA	a	g	265	-0.404	-?	0.6863	0.9909
	PACC	Longitudinal	rs62097188	18	34611412	DTNA	a	g	690	-1.758	--	0.07874	0.9909
	PACC	Longitudinal	rs9807153	18	34635520	DTNA	a	t	690	0.314	-+	0.7539	0.9909
	PACC	Longitudinal	rs2730126	18	34635939	DTNA	a	c	690	-0.585	--	0.5588	0.9909
	PACC	Longitudinal	rs1659526	18	34644451	DTNA	a	g	690	-0.118	-+	0.9059	0.9909
	PACC	Longitudinal	rs17642885	18	34649976	DTNA	t	c	690	-0.352	+-	0.7249	0.9909
	PACC	Longitudinal	rs1240974	18	34650949	DTNA	t	c	690	0.085	-+	0.9322	0.9909
	PACC	Longitudinal	rs12955208	18	34656737	DTNA	a	g	690	0.106	+-	0.9158	0.9909
	PACC	Longitudinal	rs72953203	18	34660068	DTNA	a	g	690	1.75	-+	0.0802	0.9909
	PACC	Longitudinal	rs9946070	18	34665505	DTNA	a	g	690	-0.179	+-	0.8583	0.9909
	PACC	Longitudinal	rs72953211	18	34673381	DTNA	a	c	690	-0.605	-+	0.5451	0.9909
	PACC	Longitudinal	rs55971592	18	34697328	DTNA	a	g	690	-0.135	+-	0.8924	0.9909
	PACC	Longitudinal	rs78837792	18	34703359	DTNA	t	c	690	0.057	+-	0.9548	0.9909
	PACC	Longitudinal	rs11663468	18	34707936	DTNA	t	c	690	-0.125	-+	0.9007	0.9909
	PACC	Longitudinal	rs12963825	18	34709484	DTNA	a	g	690	-0.025	+-	0.98	0.9909
	PACC	Longitudinal	rs1480432	18	34727166	DTNA	t	g	690	0.228	+-	0.8195	0.9909
	PACC	Longitudinal	rs45556134	18	34729425	DTNA	a	g	690	-0.288	--	0.773	0.9909
	PACC	Longitudinal	rs899828	18	34732688	DTNA	t	g	425	-0.175	?-	0.861	0.9909
	PACC	Longitudinal	rs17556884	18	34736455	DTNA	t	c	690	0.58	+-	0.5621	0.9909
	PACC	Longitudinal	rs1480428	18	34738732	DTNA	a	g	690	0.937	++	0.3486	0.9909
[truncated: 570 more rows]

## Sheet: Table S5
Supplementary Table 5: G-GRS Aβ+ participants
[truncated: 37 more rows]
