# Supplementary material for: Genetic variation in the glymphatic pathway predicts cognition and neurodegeneration in preclinical Alzheimer’s disease
Source: Research Square preprint supplement (doi:10.21203/rs.3.rs-9444687/v1), 2026-05-06
Supplement: Supplementary file 2 [file baea7d17b83dbedc7f287aca.xlsx]

## Sheet: Table S6
	Supplementary Table 6A: Participants with Aβ data available
		ADNI	AIBL	p
	n	107	246
	Age mean(sd)	71.9 (6.1)	71 (5.1)	0.183
	Sex			0.39
	Male	53(49.5%)	108(43.9%)
	Female	54(50.5%)	138(56.1%)
	APOE-e4			1
	ε4-	92(86%)	211(85.8%)
	ε4+	15(14%)	35(14.2%)
	Centiloid mean(sd)	-2.8 (10.4)	-2.2 (10.1)	0.61
	Supplementary Table 6B: Participants with hippocampal volume data available
		ADNI	AIBL	p
	n	93	245
	Age mean(sd)	71.5 (6.2)	71.9 (5.1)	0.59
	Sex			0.35
	Male	47(50.5%)	108(44.1%)
	Female	46(49.5%)	137(55.9%)
	APOE-e4			1
	ε4-	80(86%)	210(85.7%)
	ε4+	13(14%)	35(14.3%)
	Supplementary Table 6C: Participants with PACC data available
		ADNI	AIBL	p
	n	106	246
	Age mean(sd)	71.2 (5.6)	69.7 (5.1)	0.02
	Sex			0.35
	Male	53(50%)	108(43.9%)
	Female	53(50%)	138(56.1%)
	APOE-e4			0.93
	ε4-	92(86.8%)	211(85.8%)
	ε4+	14(13.2%)	35(14.2%)
	Education			1e-06
	0-8	1(0.9%)	8(3.3%)
	9-62	8(7.5%)	77(31.3%)
	63-65	17(16%)	48(19.5%)
	65+	80(75.5%)	113(45.9%)
	Supplementary Table 6D: Participants with longitudinal Aβ data available
		ADNI	AIBL	p
	n	106	246
	Age mean(sd)	71.9 (6.2)	69.7 (5.1)	<0.001
	Sex			0.44
	Male	52(49.1%)	108(43.9%)
	Female	54(50.9%)	138(56.1%)
	APOE-e4			1
	ε4-	91(85.8%)	211(85.8%)
	ε4+	15(14.2%)	35(14.2%)
	Supplementary Table 6E: Participants with longitudinal hippocampal volume data available
		ADNI	AIBL	p
	n	47	64
	Age mean(sd)	71.5 (5.7)	69.9 (5.3)	0.120425
	Sex			0.03
	Male	31(66%)	28(43.8%)
	Female	16(34%)	36(56.2%)
	APOE-e4			1
	ε4-	41(87.2%)	57(89.1%)
	ε4+	6(12.8%)	7(10.9%)
	Supplementary Table 6F: Participants with longitudinal PACC data available
		ADNI	AIBL	p
	n	71	194
	Age mean(sd)	72 (5.9)	69.7 (5.2)	0.00423044
	Sex			0.22
	Male	40(56.3%)	91(46.9%)
	Female	31(43.7%)	103(53.1%)
	APOE-e4			0.8
	ε4-	63(88.7%)	168(86.6%)
	ε4+	8(11.3%)	26(13.4%)
	Education			6e-06
	0-8	1(1.4%)	7(3.6%)
	9-62	4(5.6%)	65(33.5%)
	63-65	11(15.5%)	35(18%)
	65+	55(77.5%)	87(44.8%)

## Sheet: Table S7 
Supplementary Table 7: Meta-Analysis of linear regression results in Aβ- participants (additive genetic model)
	Outcome	Model	SNP	CHROM	POS	Gene_Symbol	Allele1	Allele2	Weight	Zscore	Direction	P	FDR_P
	Centiloid	Cross-Sectional	rs111599092	3	49465346	DAG1	a	g	353	0.109	+-	0.9129	0.997
	Centiloid	Cross-Sectional	rs73073015	3	49465733	DAG1	a	g	353	0.259	++	0.7955	0.997
	Centiloid	Cross-Sectional	rs7611164	3	49471395	DAG1	t	g	353	0.13	+-	0.8969	0.997
	Centiloid	Cross-Sectional	rs1568661	3	49483525	DAG1	a	g	353	0.488	++	0.6255	0.997
	Centiloid	Cross-Sectional	rs7374731	3	49495661	DAG1	c	g	353	1.67	-+	0.09494	0.997
	Centiloid	Cross-Sectional	rs73074811	3	49516098	DAG1	a	t	353	-1.138	--	0.2553	0.997
	Centiloid	Cross-Sectional	rs3870338	3	49519618	DAG1	a	g	353	0.488	++	0.6255	0.997
	Centiloid	Cross-Sectional	rs55935606	3	49528072	DAG1	a	g	353	-2.062	--	0.03918	0.997
	Centiloid	Cross-Sectional	rs75153130	3	49530436	DAG1	a	c	353	-0.13	-+	0.8969	0.997
	Centiloid	Cross-Sectional	rs13079082	3	49537375	DAG1	c	g	353	1.342	-+	0.1796	0.997
	Centiloid	Cross-Sectional	rs4052546	3	49538116	DAG1	c	g	353	-1.67	+-	0.09494	0.997
	Centiloid	Cross-Sectional	rs73074830	3	49539584	DAG1	a	c	353	0.569	++	0.5696	0.997
	Centiloid	Cross-Sectional	rs114093899	3	49539955	DAG1	c	g	353	-0.62	--	0.5356	0.997
	Centiloid	Cross-Sectional	rs9789109	18	26842291	AQP4	a	g	353	-0.004	-+	0.997	0.997
	Centiloid	Cross-Sectional	rs10164026	18	26842362	AQP4	a	c	353	0.207	++	0.8358	0.997
	Centiloid	Cross-Sectional	rs4800270	18	26844933	AQP4	t	g	353	-0.607	--	0.5438	0.997
	Centiloid	Cross-Sectional	rs79668602	18	26845488	AQP4	a	g	353	0.457	-+	0.6476	0.997
	Centiloid	Cross-Sectional	rs12458416	18	26847267	AQP4	c	g	353	-0.169	-+	0.8659	0.997
	Centiloid	Cross-Sectional	rs12953446	18	26848521	AQP4	a	g	353	-0.986	--	0.3239	0.997
	Centiloid	Cross-Sectional	rs67461489	18	26848876	AQP4	t	c	353	-0.161	--	0.8719	0.997
	Centiloid	Cross-Sectional	rs11661081	18	26850068	AQP4	a	c	353	0.021	-+	0.9832	0.997
	Centiloid	Cross-Sectional	rs3763043	18	26855854	AQP4	t	c	353	0.162	++	0.8713	0.997
	Centiloid	Cross-Sectional	rs68006382	18	26856555	AQP4	a	g	353	-0.363	+-	0.7168	0.997
	Centiloid	Cross-Sectional	rs335930	18	26856961	AQP4	a	c	353	1.193	++	0.233	0.997
	Centiloid	Cross-Sectional	rs71353405	18	26857429	AQP4	t	c	353	0.115	+-	0.9084	0.997
	Centiloid	Cross-Sectional	rs162009	18	26864250	AQP4	a	g	353	-0.52	+-	0.6031	0.997
	Centiloid	Cross-Sectional	rs4800773	18	26865017	AQP4	a	g	353	-0.231	--	0.8173	0.997
	Centiloid	Cross-Sectional	rs3875089	18	26865469	AQP4	t	c	353	0.558	++	0.5771	0.997
	Centiloid	Cross-Sectional	rs72878787	18	26866517	AQP4	a	g	353	0.644	++	0.5198	0.997
	Centiloid	Cross-Sectional	rs162006	18	26866570	AQP4	t	c	353	-0.422	+-	0.6733	0.997
	Centiloid	Cross-Sectional	rs151244	18	26866755	AQP4	t	c	353	-0.22	-+	0.8256	0.997
	Centiloid	Cross-Sectional	rs72878794	18	26866839	AQP4	t	c	353	-0.344	-+	0.7311	0.997
	Centiloid	Cross-Sectional	rs9961118	18	26866901	AQP4	t	c	353	1.568	++	0.117	0.997
	Centiloid	Cross-Sectional	rs162004	18	26867972	AQP4	c	g	353	1.382	++	0.1671	0.997
	Centiloid	Cross-Sectional	rs72878799	18	26868165	AQP4	a	g	353	-0.042	+-	0.9663	0.997
	Centiloid	Cross-Sectional	rs11662318	18	26869056	AQP4	t	c	353	1.546	++	0.1221	0.997
	Centiloid	Cross-Sectional	rs151246	18	26869139	AQP4	t	g	353	0.246	+-	0.8058	0.997
	Centiloid	Cross-Sectional	rs491148	18	26869803	AQP4	a	g	353	-0.891	--	0.3727	0.997
	Centiloid	Cross-Sectional	rs162002	18	26871015	AQP4	a	g	353	-0.999	--	0.318	0.997
	Centiloid	Cross-Sectional	rs162001	18	26871481	AQP4	a	c	353	0.281	+-	0.7785	0.997
	Centiloid	Cross-Sectional	rs3865411	18	26871684	AQP4	a	g	353	-0.982	--	0.3262	0.997
	Centiloid	Cross-Sectional	rs162000	18	26872471	AQP4	a	c	353	-1.222	--	0.2217	0.997
	Centiloid	Cross-Sectional	rs12969503	18	26873564	AQP4	t	g	353	-1.169	--	0.2424	0.997
	Centiloid	Cross-Sectional	rs8094228	18	26873767	AQP4	t	c	353	0.346	+-	0.7291	0.997
	Centiloid	Cross-Sectional	rs480647	18	26874290	AQP4	t	c	353	-0.252	+-	0.8014	0.997
	Centiloid	Cross-Sectional	rs10502478	18	26874616	AQP4	a	c	353	-0.538	+-	0.5905	0.997
	Centiloid	Cross-Sectional	rs7234562	18	34483685	DTNA	t	c	353	0.709	-+	0.4785	0.997
	Centiloid	Cross-Sectional	rs79922046	18	34485536	DTNA	a	g	353	0.858	++	0.3911	0.997
	Centiloid	Cross-Sectional	rs9955950	18	34485672	DTNA	t	c	353	0.729	-+	0.4658	0.997
	Centiloid	Cross-Sectional	rs12957028	18	34485948	DTNA	a	g	353	-0.172	--	0.8631	0.997
	Centiloid	Cross-Sectional	rs72639491	18	34491438	DTNA	a	g	353	-0.084	-+	0.9328	0.997
	Centiloid	Cross-Sectional	rs62097347	18	34492032	DTNA	c	g	353	-0.151	+-	0.8799	0.997
	Centiloid	Cross-Sectional	rs9961251	18	34492344	DTNA	t	c	353	-0.469	+-	0.6388	0.997
	Centiloid	Cross-Sectional	rs111846993	18	34494001	DTNA	t	c	353	-0.662	--	0.5077	0.997
	Centiloid	Cross-Sectional	rs4799769	18	34494577	DTNA	c	g	353	1.227	++	0.2197	0.997
	Centiloid	Cross-Sectional	rs8092794	18	34496273	DTNA	a	g	353	0.142	-+	0.8874	0.997
	Centiloid	Cross-Sectional	rs7243528	18	34497055	DTNA	t	c	353	0.195	+-	0.8452	0.997
	Centiloid	Cross-Sectional	rs79972565	18	34497194	DTNA	t	g	353	0.293	-+	0.7697	0.997
	Centiloid	Cross-Sectional	rs35839923	18	34497764	DTNA	a	g	353	0.876	++	0.3808	0.997
	Centiloid	Cross-Sectional	rs62097349	18	34499519	DTNA	a	g	353	-0.611	--	0.5409	0.997
	Centiloid	Cross-Sectional	rs9965622	18	34502153	DTNA	t	c	353	0.504	-+	0.6141	0.997
	Centiloid	Cross-Sectional	rs62098462	18	34504364	DTNA	t	c	353	-1.141	--	0.2538	0.997
	Centiloid	Cross-Sectional	rs75127284	18	34506592	DTNA	a	c	353	-0.886	--	0.3754	0.997
	Centiloid	Cross-Sectional	rs2439861	18	34507940	DTNA	a	g	353	0.103	+-	0.9177	0.997
	Centiloid	Cross-Sectional	rs35982920	18	34516411	DTNA	a	g	353	-0.539	-+	0.5902	0.997
	Centiloid	Cross-Sectional	rs2509597	18	34528430	DTNA	a	t	353	0.321	+-	0.7484	0.997
	Centiloid	Cross-Sectional	rs71363449	18	34531997	DTNA	t	c	353	0.551	++	0.5817	0.997
	Centiloid	Cross-Sectional	rs2439853	18	34533937	DTNA	a	g	353	0.824	++	0.4097	0.997
	Centiloid	Cross-Sectional	rs2439000	18	34536414	DTNA	c	g	353	-0.442	+-	0.6582	0.997
	Centiloid	Cross-Sectional	rs11875892	18	34544032	DTNA	a	g	353	0.023	-+	0.9817	0.997
	Centiloid	Cross-Sectional	rs1967583	18	34544573	DTNA	t	c	353	1.36	++	0.1739	0.997
	Centiloid	Cross-Sectional	rs28856895	18	34555507	DTNA	a	g	353	0.635	+-	0.5252	0.997
	Centiloid	Cross-Sectional	rs77973497	18	34560529	DTNA	a	c	353	-1.879	--	0.06027	0.997
	Centiloid	Cross-Sectional	rs2579796	18	34569243	DTNA	a	g	353	1.048	++	0.2945	0.997
	Centiloid	Cross-Sectional	rs2579797	18	34571732	DTNA	t	g	353	0.542	-+	0.5877	0.997
	Centiloid	Cross-Sectional	rs2685557	18	34576782	DTNA	t	c	353	1.03	++	0.3028	0.997
	Centiloid	Cross-Sectional	rs9958492	18	34577783	DTNA	t	c	353	0.522	+-	0.6019	0.997
	Centiloid	Cross-Sectional	rs2579802	18	34579787	DTNA	a	c	353	0.153	-+	0.8784	0.997
	Centiloid	Cross-Sectional	rs74920018	18	34607557	DTNA	a	t	353	-1.702	--	0.08869	0.997
	Centiloid	Cross-Sectional	rs1439127	18	34607759	DTNA	a	t	353	0.307	-+	0.7592	0.997
	Centiloid	Cross-Sectional	rs12327368	18	34611361	DTNA	a	g	353	0.545	+-	0.5861	0.997
	Centiloid	Cross-Sectional	rs62097188	18	34611412	DTNA	a	g	353	0.596	-+	0.5511	0.997
	Centiloid	Cross-Sectional	rs9807153	18	34635520	DTNA	a	t	353	0.221	-+	0.8253	0.997
	Centiloid	Cross-Sectional	rs2730126	18	34635939	DTNA	a	c	353	0.512	++	0.6089	0.997
	Centiloid	Cross-Sectional	rs1659526	18	34644451	DTNA	a	g	353	-0.008	-+	0.9936	0.997
	Centiloid	Cross-Sectional	rs17642885	18	34649976	DTNA	t	c	353	0.555	++	0.5786	0.997
	Centiloid	Cross-Sectional	rs1240974	18	34650949	DTNA	t	c	353	0.09	-+	0.9281	0.997
	Centiloid	Cross-Sectional	rs55869511	18	34651262	DTNA	a	c	353	0.267	++	0.7892	0.997
	Centiloid	Cross-Sectional	rs12955208	18	34656737	DTNA	a	g	353	-0.604	+-	0.546	0.997
	Centiloid	Cross-Sectional	rs72953203	18	34660068	DTNA	a	g	353	0.059	+-	0.9526	0.997
	Centiloid	Cross-Sectional	rs9946070	18	34665505	DTNA	a	g	353	0.535	++	0.5925	0.997
	Centiloid	Cross-Sectional	rs72953211	18	34673381	DTNA	a	c	353	-0.016	+-	0.9871	0.997
	Centiloid	Cross-Sectional	rs55971592	18	34697328	DTNA	a	g	353	-0.137	+-	0.891	0.997
	Centiloid	Cross-Sectional	rs78837792	18	34703359	DTNA	t	c	353	-0.332	-+	0.7399	0.997
	Centiloid	Cross-Sectional	rs11663468	18	34707936	DTNA	t	c	353	-0.694	--	0.4879	0.997
	Centiloid	Cross-Sectional	rs12963825	18	34709484	DTNA	a	g	353	0.42	++	0.6748	0.997
	Centiloid	Cross-Sectional	rs1480432	18	34727166	DTNA	t	g	353	-0.102	+-	0.9185	0.997
	Centiloid	Cross-Sectional	rs45556134	18	34729425	DTNA	a	g	353	0.889	-+	0.3742	0.997
	Centiloid	Cross-Sectional	rs899828	18	34732688	DTNA	t	g	353	0.917	++	0.3591	0.997
	Centiloid	Cross-Sectional	rs17556884	18	34736455	DTNA	t	c	353	-0.375	--	0.7078	0.997
	Centiloid	Cross-Sectional	rs1480428	18	34738732	DTNA	a	g	353	0.065	+-	0.9483	0.997
	Centiloid	Cross-Sectional	rs12957349	18	34739291	DTNA	t	c	353	-0.121	+-	0.904	0.997
	Centiloid	Cross-Sectional	rs12608110	18	34752198	DTNA	a	g	353	1.576	-+	0.115	0.997
	Centiloid	Cross-Sectional	rs7228547	18	34760039	DTNA	a	g	353	0.83	++	0.4066	0.997
	Centiloid	Cross-Sectional	rs8099437	18	34761448	DTNA	t	g	353	0.15	+-	0.8811	0.997
	Centiloid	Cross-Sectional	rs72955132	18	34762382	DTNA	a	g	353	-0.493	--	0.622	0.997
	Centiloid	Cross-Sectional	rs1817452	18	34776629	DTNA	t	c	353	-0.427	+-	0.6693	0.997
	Centiloid	Cross-Sectional	rs56404226	18	34778060	DTNA	a	g	353	-1.442	+-	0.1494	0.997
	Centiloid	Cross-Sectional	rs72955175	18	34779045	DTNA	a	t	353	-0.311	+-	0.7561	0.997
	Centiloid	Cross-Sectional	rs12608251	18	34782906	DTNA	t	g	353	0.026	+-	0.9794	0.997
	Centiloid	Cross-Sectional	rs76880720	18	34791141	DTNA	a	c	353	0.384	-+	0.7013	0.997
	Centiloid	Cross-Sectional	rs9989533	18	34793909	DTNA	t	c	353	-0.266	-+	0.7904	0.997
	Centiloid	Cross-Sectional	rs79500711	18	34794379	DTNA	a	g	353	1.049	++	0.2944	0.997
	Centiloid	Cross-Sectional	rs138856611	18	34801684	DTNA	t	g	353	1.46	++	0.1444	0.997
	Centiloid	Cross-Sectional	rs62097226	18	34804223	DTNA	a	t	353	0.594	++	0.5522	0.997
	Centiloid	Cross-Sectional	rs4458079	18	34806161	DTNA	t	c	353	0.425	++	0.6709	0.997
	Centiloid	Cross-Sectional	rs8086358	18	34813672	DTNA	t	g	353	-0.213	-+	0.831	0.997
	Centiloid	Cross-Sectional	rs72963047	18	34818804	DTNA	a	c	353	-0.141	-+	0.8878	0.997
	Centiloid	Cross-Sectional	rs17557660	18	34831178	DTNA	a	t	353	1.188	-+	0.2349	0.997
	Centiloid	Cross-Sectional	rs1790533	18	34831631	DTNA	a	g	353	-0.048	+-	0.9618	0.997
	Centiloid	Cross-Sectional	rs4799782	18	34841123	DTNA	a	g	353	-1.581	--	0.114	0.997
	Centiloid	Cross-Sectional	rs1786604	18	34846264	DTNA	a	g	353	-0.301	+-	0.7633	0.997
	Centiloid	Cross-Sectional	rs7233779	18	34863262	DTNA	a	g	353	-1.759	--	0.0785	0.997
	Centiloid	Cross-Sectional	rs644982	18	34869793	DTNA	a	g	353	-0.457	--	0.6473	0.997
	Centiloid	Cross-Sectional	rs11659517	18	34870978	DTNA	a	t	353	-0.799	+-	0.424	0.997
	Centiloid	Cross-Sectional	rs524969	18	34872102	DTNA	a	t	353	0.894	-+	0.3711	0.997
	Centiloid	Cross-Sectional	rs637914	18	34876135	DTNA	a	t	353	1.474	++	0.1405	0.997
	Centiloid	Cross-Sectional	rs9304141	18	34879143	DTNA	t	c	353	0.29	-+	0.7717	0.997
	Centiloid	Cross-Sectional	rs2288085	18	34879740	DTNA	a	g	353	-0.127	+-	0.8987	0.997
	Centiloid	Cross-Sectional	rs17558116	18	34882719	DTNA	t	c	353	-1.038	--	0.2994	0.997
	Centiloid	Cross-Sectional	rs10502637	18	34890006	DTNA	t	c	353	-1.176	--	0.2396	0.997
	Centiloid	Cross-Sectional	rs149163416	18	34898841	DTNA	a	g	353	-0.614	--	0.5392	0.997
	Centiloid	Cross-Sectional	20:33413780	20	33413780	SNTA1	a	t	353	0.338	++	0.7354	0.997
	Centiloid	Cross-Sectional	rs291683	20	33431611	SNTA1	t	c	353	-0.195	-+	0.8457	0.997
	Centiloid	Cross-Sectional	20:33433270	20	33433270	SNTA1	t	c	353	0.316	++	0.7518	0.997
	Centiloid	Cross-Sectional	rs6141396	20	33436147	SNTA1	a	c	107	0.259	+?	0.796	0.997
	Centiloid	Cross-Sectional	rs293721	20	33441633	SNTA1	t	c	353	1.287	++	0.198	0.997
	Centiloid	Longitudinal	rs111599092	3	49465346	DAG1	a	g	352	1.087	++	0.2769	0.744284
	Centiloid	Longitudinal	rs73073015	3	49465733	DAG1	a	g	352	-0.077	+-	0.9389	0.9959
	Centiloid	Longitudinal	rs7611164	3	49471395	DAG1	t	g	352	0.588	+-	0.5568	0.927893
	Centiloid	Longitudinal	rs1568661	3	49483525	DAG1	a	g	352	-1.083	+-	0.279	0.744284
	Centiloid	Longitudinal	rs7374731	3	49495661	DAG1	c	g	352	-1.589	--	0.112	0.703267
	Centiloid	Longitudinal	rs73074811	3	49516098	DAG1	a	t	352	-0.432	--	0.6654	0.957322
	Centiloid	Longitudinal	rs3870338	3	49519618	DAG1	a	g	352	-1.083	+-	0.279	0.744284
	Centiloid	Longitudinal	rs55935606	3	49528072	DAG1	a	g	352	0.899	++	0.3689	0.812867
	Centiloid	Longitudinal	rs75153130	3	49530436	DAG1	a	c	352	-0.588	-+	0.5568	0.927893
	Centiloid	Longitudinal	rs13079082	3	49537375	DAG1	c	g	352	-0.015	-+	0.9879	0.9959
	Centiloid	Longitudinal	rs4052546	3	49538116	DAG1	c	g	352	1.589	++	0.112	0.703267
	Centiloid	Longitudinal	rs73074830	3	49539584	DAG1	a	c	352	-0.638	--	0.5237	0.927893
	Centiloid	Longitudinal	rs114093899	3	49539955	DAG1	c	g	352	1.472	++	0.141	0.742962
	Centiloid	Longitudinal	rs9789109	18	26842291	AQP4	a	g	352	0.572	++	0.5671	0.927893
	Centiloid	Longitudinal	rs10164026	18	26842362	AQP4	a	c	352	-0.613	--	0.54	0.927893
	Centiloid	Longitudinal	rs4800270	18	26844933	AQP4	t	g	352	-0.354	--	0.7235	0.961898
	Centiloid	Longitudinal	rs79668602	18	26845488	AQP4	a	g	352	1.216	++	0.2241	0.744284
	Centiloid	Longitudinal	rs12458416	18	26847267	AQP4	c	g	352	0.395	++	0.693	0.959
	Centiloid	Longitudinal	rs12953446	18	26848521	AQP4	a	g	352	-2.033	--	0.04208	0.703267
	Centiloid	Longitudinal	rs67461489	18	26848876	AQP4	t	c	352	2.777	++	0.005484	0.51786
	Centiloid	Longitudinal	rs11661081	18	26850068	AQP4	a	c	352	-1.839	--	0.06595	0.703267
	Centiloid	Longitudinal	rs3763043	18	26855854	AQP4	t	c	352	1.449	++	0.1472	0.744284
	Centiloid	Longitudinal	rs68006382	18	26856555	AQP4	a	g	352	-1.72	--	0.0855	0.703267
	Centiloid	Longitudinal	rs335930	18	26856961	AQP4	a	c	352	0.032	-+	0.9749	0.9959
	Centiloid	Longitudinal	rs71353405	18	26857429	AQP4	t	c	352	-2.643	--	0.008207	0.51786
	Centiloid	Longitudinal	rs162009	18	26864250	AQP4	a	g	352	-1.68	--	0.093	0.703267
	Centiloid	Longitudinal	rs4800773	18	26865017	AQP4	a	g	352	-1.566	--	0.1174	0.703267
	Centiloid	Longitudinal	rs3875089	18	26865469	AQP4	t	c	352	2.532	++	0.01134	0.51786
	Centiloid	Longitudinal	rs72878787	18	26866517	AQP4	a	g	352	0.999	++	0.3176	0.763354
	Centiloid	Longitudinal	rs162006	18	26866570	AQP4	t	c	352	0.022	-+	0.9821	0.9959
	Centiloid	Longitudinal	rs151244	18	26866755	AQP4	t	c	352	-0.434	+-	0.664	0.957322
	Centiloid	Longitudinal	rs72878794	18	26866839	AQP4	t	c	352	0.145	+-	0.885	0.991412
	Centiloid	Longitudinal	rs9961118	18	26866901	AQP4	t	c	352	-0.406	-+	0.6848	0.957322
	Centiloid	Longitudinal	rs162004	18	26867972	AQP4	c	g	352	-0.932	--	0.3513	0.811893
	Centiloid	Longitudinal	rs72878799	18	26868165	AQP4	a	g	352	-0.919	-+	0.3583	0.811893
	Centiloid	Longitudinal	rs11662318	18	26869056	AQP4	t	c	352	-1.683	--	0.09233	0.703267
	Centiloid	Longitudinal	rs151246	18	26869139	AQP4	t	g	352	0.476	++	0.6342	0.957322
	Centiloid	Longitudinal	rs491148	18	26869803	AQP4	a	g	352	1.642	++	0.1006	0.703267
	Centiloid	Longitudinal	rs162002	18	26871015	AQP4	a	g	352	1.568	++	0.117	0.703267
	Centiloid	Longitudinal	rs162001	18	26871481	AQP4	a	c	352	-0.889	--	0.3738	0.812867
	Centiloid	Longitudinal	rs3865411	18	26871684	AQP4	a	g	352	0.195	-+	0.8455	0.991412
	Centiloid	Longitudinal	rs162000	18	26872471	AQP4	a	c	352	0.738	++	0.4607	0.909093
	Centiloid	Longitudinal	rs12969503	18	26873564	AQP4	t	g	352	0.56	+-	0.5757	0.927893
	Centiloid	Longitudinal	rs8094228	18	26873767	AQP4	t	c	352	-1.077	-+	0.2814	0.744284
	Centiloid	Longitudinal	rs480647	18	26874290	AQP4	t	c	352	-0.812	+-	0.4168	0.856854
	Centiloid	Longitudinal	rs10502478	18	26874616	AQP4	a	c	352	-1.499	--	0.134	0.73432
	Centiloid	Longitudinal	rs7234562	18	34483685	DTNA	t	c	352	-0.718	--	0.473	0.91269
	Centiloid	Longitudinal	rs79922046	18	34485536	DTNA	a	g	352	-0.797	--	0.4253	0.856854
	Centiloid	Longitudinal	rs9955950	18	34485672	DTNA	t	c	352	0.088	++	0.9303	0.9959
	Centiloid	Longitudinal	rs12957028	18	34485948	DTNA	a	g	352	0.644	++	0.5193	0.927893
	Centiloid	Longitudinal	rs72639491	18	34491438	DTNA	a	g	352	-0.355	--	0.7223	0.961898
	Centiloid	Longitudinal	rs62097347	18	34492032	DTNA	c	g	352	-0.798	--	0.425	0.856854
	Centiloid	Longitudinal	rs9961251	18	34492344	DTNA	t	c	352	-1.314	--	0.1887	0.744284
	Centiloid	Longitudinal	rs111846993	18	34494001	DTNA	t	c	352	-0.702	--	0.4824	0.9179
	Centiloid	Longitudinal	rs4799769	18	34494577	DTNA	c	g	352	-0.014	+-	0.9891	0.9959
	Centiloid	Longitudinal	rs8092794	18	34496273	DTNA	a	g	352	-0.052	-+	0.9589	0.9959
	Centiloid	Longitudinal	rs7243528	18	34497055	DTNA	t	c	352	1.04	++	0.2982	0.744284
	Centiloid	Longitudinal	rs79972565	18	34497194	DTNA	t	g	352	1.289	++	0.1972	0.744284
	Centiloid	Longitudinal	rs35839923	18	34497764	DTNA	a	g	352	-1.607	--	0.108	0.703267
	Centiloid	Longitudinal	rs62097349	18	34499519	DTNA	a	g	352	-1.415	--	0.1571	0.744284
	Centiloid	Longitudinal	rs9965622	18	34502153	DTNA	t	c	352	1.541	-+	0.1232	0.703267
	Centiloid	Longitudinal	rs62098462	18	34504364	DTNA	t	c	352	0.149	-+	0.8818	0.991412
	Centiloid	Longitudinal	rs75127284	18	34506592	DTNA	a	c	352	-1.366	--	0.1721	0.744284
	Centiloid	Longitudinal	rs2439861	18	34507940	DTNA	a	g	352	0.913	++	0.3615	0.811893
	Centiloid	Longitudinal	rs35982920	18	34516411	DTNA	a	g	352	2.283	++	0.02245	0.61513
	Centiloid	Longitudinal	rs2509597	18	34528430	DTNA	a	t	352	1.778	++	0.07541	0.703267
	Centiloid	Longitudinal	rs71363449	18	34531997	DTNA	t	c	352	-0.246	-+	0.8057	0.991412
	Centiloid	Longitudinal	rs2439853	18	34533937	DTNA	a	g	352	-1.019	--	0.3084	0.754479
	Centiloid	Longitudinal	rs2439000	18	34536414	DTNA	c	g	352	1.098	++	0.272	0.744284
	Centiloid	Longitudinal	rs11875892	18	34544032	DTNA	a	g	352	1.817	++	0.06925	0.703267
	Centiloid	Longitudinal	rs1967583	18	34544573	DTNA	t	c	352	-1.56	--	0.1187	0.703267
	Centiloid	Longitudinal	rs28856895	18	34555507	DTNA	a	g	352	-0.22	-+	0.8262	0.991412
	Centiloid	Longitudinal	rs77973497	18	34560529	DTNA	a	c	352	1.818	++	0.06912	0.703267
	Centiloid	Longitudinal	rs2579796	18	34569243	DTNA	a	g	352	-1.055	--	0.2915	0.744284
	Centiloid	Longitudinal	rs2579797	18	34571732	DTNA	t	g	352	-1.061	--	0.2886	0.744284
	Centiloid	Longitudinal	rs2685557	18	34576782	DTNA	t	c	352	-1.15	--	0.2499	0.744284
	Centiloid	Longitudinal	rs9958492	18	34577783	DTNA	t	c	352	-0.359	-+	0.7198	0.961898
	Centiloid	Longitudinal	rs2579802	18	34579787	DTNA	a	c	352	-0.477	-+	0.6336	0.957322
	Centiloid	Longitudinal	rs74920018	18	34607557	DTNA	a	t	352	1.91	++	0.05612	0.703267
	Centiloid	Longitudinal	rs1439127	18	34607759	DTNA	a	t	352	-0.23	+-	0.8182	0.991412
	Centiloid	Longitudinal	rs12327368	18	34611361	DTNA	a	g	352	-0.216	-+	0.8294	0.991412
	Centiloid	Longitudinal	rs62097188	18	34611412	DTNA	a	g	352	1.128	++	0.2592	0.744284
	Centiloid	Longitudinal	rs9807153	18	34635520	DTNA	a	t	352	-0.094	+-	0.9252	0.9959
	Centiloid	Longitudinal	rs2730126	18	34635939	DTNA	a	c	352	-0.568	-+	0.5698	0.927893
	Centiloid	Longitudinal	rs1659526	18	34644451	DTNA	a	g	352	0.138	++	0.8901	0.991412
	Centiloid	Longitudinal	rs17642885	18	34649976	DTNA	t	c	352	-0.068	-+	0.9461	0.9959
	Centiloid	Longitudinal	rs1240974	18	34650949	DTNA	t	c	352	-1.039	+-	0.2988	0.744284
	Centiloid	Longitudinal	rs55869511	18	34651262	DTNA	a	c	352	0.005	-+	0.9959	0.9959
	Centiloid	Longitudinal	rs12955208	18	34656737	DTNA	a	g	352	1.329	++	0.1838	0.744284
	Centiloid	Longitudinal	rs72953203	18	34660068	DTNA	a	g	352	0.614	-+	0.5389	0.927893
	Centiloid	Longitudinal	rs9946070	18	34665505	DTNA	a	g	352	-0.204	+-	0.8383	0.991412
	Centiloid	Longitudinal	rs72953211	18	34673381	DTNA	a	c	352	0.619	-+	0.5357	0.927893
	Centiloid	Longitudinal	rs55971592	18	34697328	DTNA	a	g	352	0.018	-+	0.9858	0.9959
	Centiloid	Longitudinal	rs78837792	18	34703359	DTNA	t	c	352	-0.472	+-	0.6373	0.957322
	Centiloid	Longitudinal	rs11663468	18	34707936	DTNA	t	c	352	-1.306	+-	0.1917	0.744284
	Centiloid	Longitudinal	rs12963825	18	34709484	DTNA	a	g	352	-1.237	--	0.2161	0.744284
	Centiloid	Longitudinal	rs1480432	18	34727166	DTNA	t	g	352	-0.102	+-	0.919	0.9959
	Centiloid	Longitudinal	rs45556134	18	34729425	DTNA	a	g	352	1.655	++	0.09791	0.703267
	Centiloid	Longitudinal	rs899828	18	34732688	DTNA	t	g	352	-2.318	--	0.02045	0.61513
	Centiloid	Longitudinal	rs17556884	18	34736455	DTNA	t	c	352	0.445	++	0.6561	0.957322
	Centiloid	Longitudinal	rs1480428	18	34738732	DTNA	a	g	352	1.214	-+	0.2248	0.744284
	Centiloid	Longitudinal	rs12957349	18	34739291	DTNA	t	c	352	1.245	++	0.2133	0.744284
	Centiloid	Longitudinal	rs12608110	18	34752198	DTNA	a	g	352	-0.152	+-	0.8789	0.991412
	Centiloid	Longitudinal	rs7228547	18	34760039	DTNA	a	g	352	0.817	-+	0.4139	0.856854
	Centiloid	Longitudinal	rs8099437	18	34761448	DTNA	t	g	352	1.087	-+	0.2772	0.744284
	Centiloid	Longitudinal	rs72955132	18	34762382	DTNA	a	g	352	0.508	++	0.6115	0.957322
	Centiloid	Longitudinal	rs1817452	18	34776629	DTNA	t	c	352	1.387	++	0.1653	0.744284
	Centiloid	Longitudinal	rs56404226	18	34778060	DTNA	a	g	352	0.296	++	0.7674	0.991412
	Centiloid	Longitudinal	rs72955175	18	34779045	DTNA	a	t	352	1.219	-+	0.223	0.744284
	Centiloid	Longitudinal	rs12608251	18	34782906	DTNA	t	g	352	0.408	+-	0.6831	0.957322
	Centiloid	Longitudinal	rs76880720	18	34791141	DTNA	a	c	352	-1.162	--	0.2453	0.744284
	Centiloid	Longitudinal	rs9989533	18	34793909	DTNA	t	c	352	-0.198	+-	0.8428	0.991412
	Centiloid	Longitudinal	rs79500711	18	34794379	DTNA	a	g	352	0.358	-+	0.7204	0.961898
	Centiloid	Longitudinal	rs138856611	18	34801684	DTNA	t	g	352	0.12	++	0.9047	0.9959
	Centiloid	Longitudinal	rs62097226	18	34804223	DTNA	a	t	352	-0.732	+-	0.4645	0.909093
	Centiloid	Longitudinal	rs4458079	18	34806161	DTNA	t	c	352	-0.236	-+	0.8134	0.991412
	Centiloid	Longitudinal	rs8086358	18	34813672	DTNA	t	g	352	-1.111	+-	0.2664	0.744284
	Centiloid	Longitudinal	rs72963047	18	34818804	DTNA	a	c	352	-0.952	--	0.341	0.805466
	Centiloid	Longitudinal	rs17557660	18	34831178	DTNA	a	t	352	-1.7	+-	0.08916	0.703267
	Centiloid	Longitudinal	rs1790533	18	34831631	DTNA	a	g	352	0.254	+-	0.7996	0.991412
	Centiloid	Longitudinal	rs4799782	18	34841123	DTNA	a	g	352	-0.61	--	0.5415	0.927893
	Centiloid	Longitudinal	rs1786604	18	34846264	DTNA	a	g	352	1.236	-+	0.2165	0.744284
	Centiloid	Longitudinal	rs7233779	18	34863262	DTNA	a	g	352	-1.108	+-	0.2679	0.744284
	Centiloid	Longitudinal	rs644982	18	34869793	DTNA	a	g	352	-0.007	+-	0.9943	0.9959
	Centiloid	Longitudinal	rs11659517	18	34870978	DTNA	a	t	352	0.523	++	0.6007	0.956929
	Centiloid	Longitudinal	rs524969	18	34872102	DTNA	a	t	352	-0.432	-+	0.6656	0.957322
	Centiloid	Longitudinal	rs637914	18	34876135	DTNA	a	t	352	-0.153	-+	0.8788	0.991412
	Centiloid	Longitudinal	rs9304141	18	34879143	DTNA	t	c	352	0.492	++	0.6228	0.957322
	Centiloid	Longitudinal	rs2288085	18	34879740	DTNA	a	g	352	0.176	-+	0.8604	0.991412
	Centiloid	Longitudinal	rs17558116	18	34882719	DTNA	t	c	352	0.583	++	0.5601	0.927893
	Centiloid	Longitudinal	rs10502637	18	34890006	DTNA	t	c	352	-0.844	+-	0.3988	0.853681
	Centiloid	Longitudinal	rs149163416	18	34898841	DTNA	a	g	352	0.151	+-	0.8804	0.991412
	Centiloid	Longitudinal	20:33413780	20	33413780	SNTA1	a	t	352	0.345	-+	0.7302	0.961898
	Centiloid	Longitudinal	rs291683	20	33431611	SNTA1	t	c	352	-0.591	--	0.5545	0.927893
	Centiloid	Longitudinal	20:33433270	20	33433270	SNTA1	t	c	352	-0.251	--	0.8015	0.991412
	Centiloid	Longitudinal	rs6141396	20	33436147	SNTA1	a	c	106	0.409	+?	0.6822	0.957322
	Centiloid	Longitudinal	rs293721	20	33441633	SNTA1	t	c	352	-0.233	+-	0.816	0.991412
	Grey_Matter_Volume	Cross-Sectional	rs111599092	3	49465346	DAG1	a	g	338	0.356	-+	0.7216	0.941902
	Grey_Matter_Volume	Cross-Sectional	rs73073015	3	49465733	DAG1	a	g	338	1.91	++	0.0561	0.598873
	Grey_Matter_Volume	Cross-Sectional	rs7611164	3	49471395	DAG1	t	g	338	0.116	-+	0.908	0.949588
	Grey_Matter_Volume	Cross-Sectional	rs1568661	3	49483525	DAG1	a	g	338	1.589	++	0.112	0.696077
	Grey_Matter_Volume	Cross-Sectional	rs7374731	3	49495661	DAG1	c	g	338	-0.23	+-	0.8182	0.941902
	Grey_Matter_Volume	Cross-Sectional	rs73074811	3	49516098	DAG1	a	t	338	-0.208	--	0.835	0.941902
	Grey_Matter_Volume	Cross-Sectional	rs3870338	3	49519618	DAG1	a	g	338	1.589	++	0.112	0.696077
	Grey_Matter_Volume	Cross-Sectional	rs55935606	3	49528072	DAG1	a	g	338	0.627	-+	0.5304	0.906706
	Grey_Matter_Volume	Cross-Sectional	rs75153130	3	49530436	DAG1	a	c	338	-0.116	+-	0.908	0.949588
	Grey_Matter_Volume	Cross-Sectional	rs13079082	3	49537375	DAG1	c	g	338	-1.995	--	0.046	0.572909
	Grey_Matter_Volume	Cross-Sectional	rs4052546	3	49538116	DAG1	c	g	338	0.23	-+	0.8182	0.941902
	Grey_Matter_Volume	Cross-Sectional	rs73074830	3	49539584	DAG1	a	c	338	0.477	++	0.6333	0.941902
	Grey_Matter_Volume	Cross-Sectional	rs114093899	3	49539955	DAG1	c	g	338	0.671	-+	0.502	0.881718
	Grey_Matter_Volume	Cross-Sectional	rs9789109	18	26842291	AQP4	a	g	338	-0.404	+-	0.6862	0.941902
	Grey_Matter_Volume	Cross-Sectional	rs10164026	18	26842362	AQP4	a	c	338	-0.929	--	0.3529	0.762277
	Grey_Matter_Volume	Cross-Sectional	rs4800270	18	26844933	AQP4	t	g	338	0.464	-+	0.643	0.941902
	Grey_Matter_Volume	Cross-Sectional	rs79668602	18	26845488	AQP4	a	g	338	0.798	++	0.425	0.836086
	Grey_Matter_Volume	Cross-Sectional	rs12458416	18	26847267	AQP4	c	g	338	1.271	++	0.2037	0.696077
	Grey_Matter_Volume	Cross-Sectional	rs12953446	18	26848521	AQP4	a	g	338	0.424	-+	0.6719	0.941902
	Grey_Matter_Volume	Cross-Sectional	rs67461489	18	26848876	AQP4	t	c	338	-2.566	+-	0.01028	0.35209
	Grey_Matter_Volume	Cross-Sectional	rs11661081	18	26850068	AQP4	a	c	338	-0.911	--	0.3621	0.763195
	Grey_Matter_Volume	Cross-Sectional	rs3763043	18	26855854	AQP4	t	c	338	-1.534	--	0.125	0.696077
	Grey_Matter_Volume	Cross-Sectional	rs68006382	18	26856555	AQP4	a	g	338	0.181	-+	0.856	0.941902
	Grey_Matter_Volume	Cross-Sectional	rs335930	18	26856961	AQP4	a	c	338	0.389	++	0.697	0.941902
	Grey_Matter_Volume	Cross-Sectional	rs71353405	18	26857429	AQP4	t	c	338	1.57	++	0.1164	0.696077
	Grey_Matter_Volume	Cross-Sectional	rs162009	18	26864250	AQP4	a	g	338	1.127	-+	0.2598	0.6987
	Grey_Matter_Volume	Cross-Sectional	rs4800773	18	26865017	AQP4	a	g	338	1.186	++	0.2355	0.696077
	Grey_Matter_Volume	Cross-Sectional	rs3875089	18	26865469	AQP4	t	c	338	-2.021	--	0.04324	0.572909
	Grey_Matter_Volume	Cross-Sectional	rs72878787	18	26866517	AQP4	a	g	338	1.114	++	0.2651	0.6987
	Grey_Matter_Volume	Cross-Sectional	rs162006	18	26866570	AQP4	t	c	338	-0.362	+-	0.7176	0.941902
	Grey_Matter_Volume	Cross-Sectional	rs151244	18	26866755	AQP4	t	c	338	-0.18	+-	0.857	0.941902
	Grey_Matter_Volume	Cross-Sectional	rs72878794	18	26866839	AQP4	t	c	338	-0.619	+-	0.5362	0.906706
	Grey_Matter_Volume	Cross-Sectional	rs9961118	18	26866901	AQP4	t	c	338	-0.836	--	0.4031	0.812128
	Grey_Matter_Volume	Cross-Sectional	rs162004	18	26867972	AQP4	c	g	338	-1.201	--	0.2296	0.696077
	Grey_Matter_Volume	Cross-Sectional	rs72878799	18	26868165	AQP4	a	g	338	-1.139	--	0.2548	0.6987
	Grey_Matter_Volume	Cross-Sectional	rs11662318	18	26869056	AQP4	t	c	338	1.197	-+	0.2311	0.696077
	Grey_Matter_Volume	Cross-Sectional	rs151246	18	26869139	AQP4	t	g	338	-2.487	+-	0.01289	0.353186
	Grey_Matter_Volume	Cross-Sectional	rs491148	18	26869803	AQP4	a	g	338	-0.853	+-	0.3934	0.804415
	Grey_Matter_Volume	Cross-Sectional	rs162002	18	26871015	AQP4	a	g	338	-0.923	+-	0.3561	0.762277
	Grey_Matter_Volume	Cross-Sectional	rs162001	18	26871481	AQP4	a	c	338	-0.525	-+	0.5996	0.941902
	Grey_Matter_Volume	Cross-Sectional	rs3865411	18	26871684	AQP4	a	g	338	0.149	++	0.8819	0.941902
	Grey_Matter_Volume	Cross-Sectional	rs162000	18	26872471	AQP4	a	c	338	1.228	-+	0.2195	0.696077
	Grey_Matter_Volume	Cross-Sectional	rs12969503	18	26873564	AQP4	t	g	338	-0.486	--	0.6267	0.941902
	Grey_Matter_Volume	Cross-Sectional	rs8094228	18	26873767	AQP4	t	c	338	-0.338	--	0.735	0.941902
	Grey_Matter_Volume	Cross-Sectional	rs480647	18	26874290	AQP4	t	c	338	-1.626	--	0.1038	0.696077
	Grey_Matter_Volume	Cross-Sectional	rs10502478	18	26874616	AQP4	a	c	338	-0.313	--	0.7543	0.941902
	Grey_Matter_Volume	Cross-Sectional	rs7234562	18	34483685	DTNA	t	c	338	1.035	++	0.3005	0.722254
	Grey_Matter_Volume	Cross-Sectional	rs79922046	18	34485536	DTNA	a	g	338	0.179	+-	0.8582	0.941902
	Grey_Matter_Volume	Cross-Sectional	rs9955950	18	34485672	DTNA	t	c	338	0.474	++	0.6354	0.941902
	Grey_Matter_Volume	Cross-Sectional	rs12957028	18	34485948	DTNA	a	g	338	-0.73	--	0.4653	0.849948
	Grey_Matter_Volume	Cross-Sectional	rs72639491	18	34491438	DTNA	a	g	338	1.073	++	0.2831	0.715091
	Grey_Matter_Volume	Cross-Sectional	rs62097347	18	34492032	DTNA	c	g	338	-1.341	--	0.1799	0.696077
	Grey_Matter_Volume	Cross-Sectional	rs9961251	18	34492344	DTNA	t	c	338	0.347	++	0.7285	0.941902
	Grey_Matter_Volume	Cross-Sectional	rs111846993	18	34494001	DTNA	t	c	338	-0.087	--	0.9305	0.952968
	Grey_Matter_Volume	Cross-Sectional	rs4799769	18	34494577	DTNA	c	g	338	0.298	-+	0.7659	0.941902
	Grey_Matter_Volume	Cross-Sectional	rs8092794	18	34496273	DTNA	a	g	338	0.201	-+	0.8407	0.941902
	Grey_Matter_Volume	Cross-Sectional	rs7243528	18	34497055	DTNA	t	c	338	-1.551	--	0.1208	0.696077
	Grey_Matter_Volume	Cross-Sectional	rs79972565	18	34497194	DTNA	t	g	338	-1.411	--	0.1582	0.696077
	Grey_Matter_Volume	Cross-Sectional	rs35839923	18	34497764	DTNA	a	g	338	-0.784	+-	0.4333	0.836086
	Grey_Matter_Volume	Cross-Sectional	rs62097349	18	34499519	DTNA	a	g	338	-0.1	+-	0.92	0.952968
	Grey_Matter_Volume	Cross-Sectional	rs9965622	18	34502153	DTNA	t	c	338	-1.3	--	0.1935	0.696077
	Grey_Matter_Volume	Cross-Sectional	rs62098462	18	34504364	DTNA	t	c	338	0.756	++	0.4499	0.844333
	Grey_Matter_Volume	Cross-Sectional	rs75127284	18	34506592	DTNA	a	c	338	1.264	-+	0.2064	0.696077
	Grey_Matter_Volume	Cross-Sectional	rs2439861	18	34507940	DTNA	a	g	338	-0.757	+-	0.4488	0.844333
	Grey_Matter_Volume	Cross-Sectional	rs35982920	18	34516411	DTNA	a	g	338	0.213	-+	0.8311	0.941902
	Grey_Matter_Volume	Cross-Sectional	rs2509597	18	34528430	DTNA	a	t	338	-0.563	+-	0.5737	0.935677
	Grey_Matter_Volume	Cross-Sectional	rs71363449	18	34531997	DTNA	t	c	338	-1.847	--	0.06479	0.598873
	Grey_Matter_Volume	Cross-Sectional	rs2439853	18	34533937	DTNA	a	g	338	-0.206	-+	0.8369	0.941902
	Grey_Matter_Volume	Cross-Sectional	rs2439000	18	34536414	DTNA	c	g	338	-1.363	+-	0.173	0.696077
	Grey_Matter_Volume	Cross-Sectional	rs11875892	18	34544032	DTNA	a	g	338	-0.208	-+	0.8354	0.941902
	Grey_Matter_Volume	Cross-Sectional	rs1967583	18	34544573	DTNA	t	c	338	1.537	++	0.1242	0.696077
	Grey_Matter_Volume	Cross-Sectional	rs28856895	18	34555507	DTNA	a	g	338	-1.605	--	0.1084	0.696077
	Grey_Matter_Volume	Cross-Sectional	rs77973497	18	34560529	DTNA	a	c	338	-0.142	-+	0.8868	0.941902
	Grey_Matter_Volume	Cross-Sectional	rs2579796	18	34569243	DTNA	a	g	338	-0.473	-+	0.6363	0.941902
	Grey_Matter_Volume	Cross-Sectional	rs2579797	18	34571732	DTNA	t	g	338	1.207	-+	0.2273	0.696077
	Grey_Matter_Volume	Cross-Sectional	rs2685557	18	34576782	DTNA	t	c	338	-0.454	-+	0.6495	0.941902
	Grey_Matter_Volume	Cross-Sectional	rs9958492	18	34577783	DTNA	t	c	338	-2.238	--	0.02521	0.493396
	Grey_Matter_Volume	Cross-Sectional	rs2579802	18	34579787	DTNA	a	c	338	0.638	++	0.5235	0.906706
	Grey_Matter_Volume	Cross-Sectional	rs74920018	18	34607557	DTNA	a	t	338	-0.267	-+	0.7892	0.941902
	Grey_Matter_Volume	Cross-Sectional	rs1439127	18	34607759	DTNA	a	t	338	0.383	++	0.7015	0.941902
	Grey_Matter_Volume	Cross-Sectional	rs12327368	18	34611361	DTNA	a	g	338	-2.281	--	0.02256	0.493396
	Grey_Matter_Volume	Cross-Sectional	rs62097188	18	34611412	DTNA	a	g	338	0.676	++	0.4993	0.881718
	Grey_Matter_Volume	Cross-Sectional	rs9807153	18	34635520	DTNA	a	t	338	0.085	++	0.9321	0.952968
	Grey_Matter_Volume	Cross-Sectional	rs2730126	18	34635939	DTNA	a	c	338	-0.882	--	0.3779	0.784429
	Grey_Matter_Volume	Cross-Sectional	rs1659526	18	34644451	DTNA	a	g	338	0.609	-+	0.5427	0.906706
	Grey_Matter_Volume	Cross-Sectional	rs17642885	18	34649976	DTNA	t	c	338	-0.062	-+	0.9505	0.957489
	Grey_Matter_Volume	Cross-Sectional	rs1240974	18	34650949	DTNA	t	c	338	1.418	-+	0.1561	0.696077
	Grey_Matter_Volume	Cross-Sectional	rs55869511	18	34651262	DTNA	a	c	338	1.886	++	0.05928	0.598873
	Grey_Matter_Volume	Cross-Sectional	rs12955208	18	34656737	DTNA	a	g	338	0.244	-+	0.807	0.941902
	Grey_Matter_Volume	Cross-Sectional	rs72953203	18	34660068	DTNA	a	g	338	-0.514	+-	0.607	0.941902
	Grey_Matter_Volume	Cross-Sectional	rs9946070	18	34665505	DTNA	a	g	338	-1.156	--	0.2478	0.6987
	Grey_Matter_Volume	Cross-Sectional	rs72953211	18	34673381	DTNA	a	c	338	-1.383	--	0.1665	0.696077
	Grey_Matter_Volume	Cross-Sectional	rs55971592	18	34697328	DTNA	a	g	338	-0.142	+-	0.8869	0.941902
	Grey_Matter_Volume	Cross-Sectional	rs78837792	18	34703359	DTNA	t	c	338	0.072	-+	0.9423	0.95626
	Grey_Matter_Volume	Cross-Sectional	rs11663468	18	34707936	DTNA	t	c	338	1.42	++	0.1556	0.696077
	Grey_Matter_Volume	Cross-Sectional	rs12963825	18	34709484	DTNA	a	g	338	-2.764	--	0.005717	0.261076
	Grey_Matter_Volume	Cross-Sectional	rs1480432	18	34727166	DTNA	t	g	338	-0.976	--	0.3291	0.749907
	Grey_Matter_Volume	Cross-Sectional	rs45556134	18	34729425	DTNA	a	g	338	-0.182	+-	0.8555	0.941902
	Grey_Matter_Volume	Cross-Sectional	rs899828	18	34732688	DTNA	t	g	338	2.064	++	0.03901	0.572909
	Grey_Matter_Volume	Cross-Sectional	rs17556884	18	34736455	DTNA	t	c	338	3.298	++	0.0009753	0.066808
	Grey_Matter_Volume	Cross-Sectional	rs1480428	18	34738732	DTNA	a	g	338	1.467	++	0.1423	0.696077
	Grey_Matter_Volume	Cross-Sectional	rs12957349	18	34739291	DTNA	t	c	338	0.351	-+	0.7253	0.941902
	Grey_Matter_Volume	Cross-Sectional	rs12608110	18	34752198	DTNA	a	g	338	1.053	++	0.2923	0.715091
	Grey_Matter_Volume	Cross-Sectional	rs7228547	18	34760039	DTNA	a	g	338	-1.374	--	0.1696	0.696077
	Grey_Matter_Volume	Cross-Sectional	rs8099437	18	34761448	DTNA	t	g	338	1.476	++	0.1398	0.696077
	Grey_Matter_Volume	Cross-Sectional	rs72955132	18	34762382	DTNA	a	g	338	3.381	++	0.0007221	0.066808
	Grey_Matter_Volume	Cross-Sectional	rs1817452	18	34776629	DTNA	t	c	338	0.42	-+	0.6748	0.941902
	Grey_Matter_Volume	Cross-Sectional	rs56404226	18	34778060	DTNA	a	g	338	-1.314	--	0.1889	0.696077
	Grey_Matter_Volume	Cross-Sectional	rs72955175	18	34779045	DTNA	a	t	338	-1.36	--	0.1739	0.696077
	Grey_Matter_Volume	Cross-Sectional	rs12608251	18	34782906	DTNA	t	g	338	0.966	-+	0.3339	0.749907
	Grey_Matter_Volume	Cross-Sectional	rs76880720	18	34791141	DTNA	a	c	338	-0.158	+-	0.8746	0.941902
	Grey_Matter_Volume	Cross-Sectional	rs9989533	18	34793909	DTNA	t	c	338	-0.147	+-	0.8833	0.941902
	Grey_Matter_Volume	Cross-Sectional	rs79500711	18	34794379	DTNA	a	g	338	0.51	-+	0.6101	0.941902
	Grey_Matter_Volume	Cross-Sectional	rs138856611	18	34801684	DTNA	t	g	338	0.784	++	0.4333	0.836086
	Grey_Matter_Volume	Cross-Sectional	rs62097226	18	34804223	DTNA	a	t	338	0.267	-+	0.7897	0.941902
	Grey_Matter_Volume	Cross-Sectional	rs4458079	18	34806161	DTNA	t	c	338	0.428	+-	0.6685	0.941902
	Grey_Matter_Volume	Cross-Sectional	rs8086358	18	34813672	DTNA	t	g	338	1.543	++	0.1229	0.696077
	Grey_Matter_Volume	Cross-Sectional	rs72963047	18	34818804	DTNA	a	c	338	0.44	++	0.6598	0.941902
	Grey_Matter_Volume	Cross-Sectional	rs17557660	18	34831178	DTNA	a	t	338	1.489	++	0.1365	0.696077
	Grey_Matter_Volume	Cross-Sectional	rs1790533	18	34831631	DTNA	a	g	338	1.06	-+	0.2891	0.715091
	Grey_Matter_Volume	Cross-Sectional	rs4799782	18	34841123	DTNA	a	g	338	-1.009	--	0.3131	0.739564
	Grey_Matter_Volume	Cross-Sectional	rs1786604	18	34846264	DTNA	a	g	338	-1.178	--	0.2388	0.696077
	Grey_Matter_Volume	Cross-Sectional	rs7233779	18	34863262	DTNA	a	g	338	-0.023	-+	0.9814	0.9814
	Grey_Matter_Volume	Cross-Sectional	rs644982	18	34869793	DTNA	a	g	338	0.94	++	0.3473	0.762277
	Grey_Matter_Volume	Cross-Sectional	rs11659517	18	34870978	DTNA	a	t	338	0.578	-+	0.5633	0.929784
	Grey_Matter_Volume	Cross-Sectional	rs524969	18	34872102	DTNA	a	t	338	-1.065	+-	0.2867	0.715091
	Grey_Matter_Volume	Cross-Sectional	rs637914	18	34876135	DTNA	a	t	338	-0.734	+-	0.4628	0.849948
	Grey_Matter_Volume	Cross-Sectional	rs9304141	18	34879143	DTNA	t	c	338	-0.991	--	0.3216	0.746766
	Grey_Matter_Volume	Cross-Sectional	rs2288085	18	34879740	DTNA	a	g	338	-2.133	--	0.0329	0.563412
	Grey_Matter_Volume	Cross-Sectional	rs17558116	18	34882719	DTNA	t	c	338	-0.708	--	0.479	0.863461
	Grey_Matter_Volume	Cross-Sectional	rs10502637	18	34890006	DTNA	t	c	338	-1.841	--	0.06557	0.598873
	Grey_Matter_Volume	Cross-Sectional	rs149163416	18	34898841	DTNA	a	g	338	1.237	++	0.2161	0.696077
	Grey_Matter_Volume	Cross-Sectional	20:33413780	20	33413780	SNTA1	a	t	338	-0.264	--	0.7921	0.941902
	Grey_Matter_Volume	Cross-Sectional	rs291683	20	33431611	SNTA1	t	c	338	-1.256	--	0.209	0.696077
	Grey_Matter_Volume	Cross-Sectional	20:33433270	20	33433270	SNTA1	t	c	338	0.195	+-	0.8452	0.941902
	Grey_Matter_Volume	Cross-Sectional	rs6141396	20	33436147	SNTA1	a	c	93	1.114	+?	0.2652	0.6987
	Grey_Matter_Volume	Cross-Sectional	rs293721	20	33441633	SNTA1	t	c	338	0.22	-+	0.8255	0.941902
	Grey_Matter_Volume	Longitudinal	rs111599092	3	49465346	DAG1	a	g	111	0.43	-+	0.6672	0.904947
	Grey_Matter_Volume	Longitudinal	rs73073015	3	49465733	DAG1	a	g	111	1.848	++	0.06465	0.636622
	Grey_Matter_Volume	Longitudinal	rs7611164	3	49471395	DAG1	t	g	111	-0.006	+-	0.9952	0.9952
	Grey_Matter_Volume	Longitudinal	rs1568661	3	49483525	DAG1	a	g	111	0.995	-+	0.3198	0.776541
	Grey_Matter_Volume	Longitudinal	rs7374731	3	49495661	DAG1	c	g	111	0.937	++	0.3489	0.776541
	Grey_Matter_Volume	Longitudinal	rs73074811	3	49516098	DAG1	a	t	111	0.431	++	0.6666	0.904947
	Grey_Matter_Volume	Longitudinal	rs3870338	3	49519618	DAG1	a	g	111	0.995	-+	0.3198	0.776541
	Grey_Matter_Volume	Longitudinal	rs55935606	3	49528072	DAG1	a	g	111	-0.771	--	0.4407	0.788949
	Grey_Matter_Volume	Longitudinal	rs75153130	3	49530436	DAG1	a	c	111	0.006	-+	0.9952	0.9952
	Grey_Matter_Volume	Longitudinal	rs13079082	3	49537375	DAG1	c	g	111	-0.009	+-	0.9931	0.9952
	Grey_Matter_Volume	Longitudinal	rs4052546	3	49538116	DAG1	c	g	111	-0.937	--	0.3489	0.776541
	Grey_Matter_Volume	Longitudinal	rs73074830	3	49539584	DAG1	a	c	111	0.388	+-	0.6982	0.904947
	Grey_Matter_Volume	Longitudinal	rs114093899	3	49539955	DAG1	c	g	111	-0.865	+-	0.3869	0.780514
	Grey_Matter_Volume	Longitudinal	rs9789109	18	26842291	AQP4	a	g	111	-0.651	--	0.5153	0.81982
	Grey_Matter_Volume	Longitudinal	rs10164026	18	26842362	AQP4	a	c	111	-0.42	+-	0.6742	0.904947
	Grey_Matter_Volume	Longitudinal	rs4800270	18	26844933	AQP4	t	g	111	-0.933	+-	0.3508	0.776541
	Grey_Matter_Volume	Longitudinal	rs79668602	18	26845488	AQP4	a	g	111	-0.388	+-	0.698	0.904947
	Grey_Matter_Volume	Longitudinal	rs12458416	18	26847267	AQP4	c	g	111	-0.468	-+	0.6398	0.894414
	Grey_Matter_Volume	Longitudinal	rs12953446	18	26848521	AQP4	a	g	111	-0.35	+-	0.7266	0.904947
	Grey_Matter_Volume	Longitudinal	rs67461489	18	26848876	AQP4	t	c	111	0.03	-+	0.9764	0.9952
	Grey_Matter_Volume	Longitudinal	rs11661081	18	26850068	AQP4	a	c	111	1.37	++	0.1705	0.667386
	Grey_Matter_Volume	Longitudinal	rs3763043	18	26855854	AQP4	t	c	111	-0.981	+-	0.3264	0.776541
	Grey_Matter_Volume	Longitudinal	rs68006382	18	26856555	AQP4	a	g	111	1.203	-+	0.2289	0.776541
	Grey_Matter_Volume	Longitudinal	rs335930	18	26856961	AQP4	a	c	111	0.389	++	0.6971	0.904947
	Grey_Matter_Volume	Longitudinal	rs71353405	18	26857429	AQP4	t	c	111	1.612	++	0.107	0.636622
	Grey_Matter_Volume	Longitudinal	rs162009	18	26864250	AQP4	a	g	111	-0.065	+-	0.9481	0.989098
	Grey_Matter_Volume	Longitudinal	rs4800773	18	26865017	AQP4	a	g	111	-0.288	--	0.7733	0.932081
	Grey_Matter_Volume	Longitudinal	rs3875089	18	26865469	AQP4	t	c	111	0.231	-+	0.817	0.941594
	Grey_Matter_Volume	Longitudinal	rs72878787	18	26866517	AQP4	a	g	111	-1.635	--	0.1021	0.636622
	Grey_Matter_Volume	Longitudinal	rs162006	18	26866570	AQP4	t	c	111	0.939	++	0.3478	0.776541
	Grey_Matter_Volume	Longitudinal	rs151244	18	26866755	AQP4	t	c	111	-0.17	+-	0.8651	0.955796
	Grey_Matter_Volume	Longitudinal	rs72878794	18	26866839	AQP4	t	c	111	-0.747	-+	0.4552	0.788949
	Grey_Matter_Volume	Longitudinal	rs9961118	18	26866901	AQP4	t	c	111	0.538	++	0.5906	0.870024
	Grey_Matter_Volume	Longitudinal	rs162004	18	26867972	AQP4	c	g	111	-0.361	--	0.7183	0.904947
	Grey_Matter_Volume	Longitudinal	rs72878799	18	26868165	AQP4	a	g	111	0.358	-+	0.7202	0.904947
	Grey_Matter_Volume	Longitudinal	rs11662318	18	26869056	AQP4	t	c	111	-0.89	--	0.3736	0.776541
	Grey_Matter_Volume	Longitudinal	rs151246	18	26869139	AQP4	t	g	111	0.512	-+	0.6086	0.874945
	Grey_Matter_Volume	Longitudinal	rs491148	18	26869803	AQP4	a	g	111	1.032	++	0.3021	0.776541
	Grey_Matter_Volume	Longitudinal	rs162002	18	26871015	AQP4	a	g	111	-0.059	-+	0.953	0.989098
	Grey_Matter_Volume	Longitudinal	rs162001	18	26871481	AQP4	a	c	111	1.047	++	0.2949	0.776541
	Grey_Matter_Volume	Longitudinal	rs3865411	18	26871684	AQP4	a	g	111	0.206	+-	0.8366	0.941594
	Grey_Matter_Volume	Longitudinal	rs162000	18	26872471	AQP4	a	c	111	0.541	++	0.5882	0.870024
	Grey_Matter_Volume	Longitudinal	rs12969503	18	26873564	AQP4	t	g	111	1.028	++	0.3038	0.776541
	Grey_Matter_Volume	Longitudinal	rs8094228	18	26873767	AQP4	t	c	111	-1.789	--	0.07358	0.636622
	Grey_Matter_Volume	Longitudinal	rs480647	18	26874290	AQP4	t	c	111	2.103	++	0.03548	0.540084
	Grey_Matter_Volume	Longitudinal	rs10502478	18	26874616	AQP4	a	c	111	0.506	++	0.6131	0.874945
	Grey_Matter_Volume	Longitudinal	rs7234562	18	34483685	DTNA	t	c	111	2.198	++	0.02792	0.52197
	Grey_Matter_Volume	Longitudinal	rs79922046	18	34485536	DTNA	a	g	111	1.119	++	0.2631	0.776541
	Grey_Matter_Volume	Longitudinal	rs9955950	18	34485672	DTNA	t	c	111	0.935	++	0.3496	0.776541
	Grey_Matter_Volume	Longitudinal	rs12957028	18	34485948	DTNA	a	g	111	-0.821	--	0.4118	0.783564
	Grey_Matter_Volume	Longitudinal	rs72639491	18	34491438	DTNA	a	g	111	1.108	++	0.2678	0.776541
	Grey_Matter_Volume	Longitudinal	rs62097347	18	34492032	DTNA	c	g	111	-0.59	+-	0.555	0.854326
	Grey_Matter_Volume	Longitudinal	rs9961251	18	34492344	DTNA	t	c	111	0.835	++	0.4039	0.780514
	Grey_Matter_Volume	Longitudinal	rs111846993	18	34494001	DTNA	t	c	111	0.285	+-	0.7756	0.932081
	Grey_Matter_Volume	Longitudinal	rs4799769	18	34494577	DTNA	c	g	111	-1.007	--	0.314	0.776541
	Grey_Matter_Volume	Longitudinal	rs8092794	18	34496273	DTNA	a	g	111	0.977	++	0.3285	0.776541
	Grey_Matter_Volume	Longitudinal	rs7243528	18	34497055	DTNA	t	c	111	-0.376	+-	0.707	0.904947
	Grey_Matter_Volume	Longitudinal	rs79972565	18	34497194	DTNA	t	g	111	0.633	-+	0.5266	0.81982
	Grey_Matter_Volume	Longitudinal	rs35839923	18	34497764	DTNA	a	g	111	-1.633	-+	0.1024	0.636622
	Grey_Matter_Volume	Longitudinal	rs62097349	18	34499519	DTNA	a	g	111	-1.734	--	0.08294	0.636622
	Grey_Matter_Volume	Longitudinal	rs9965622	18	34502153	DTNA	t	c	111	0.563	++	0.5732	0.870024
	Grey_Matter_Volume	Longitudinal	rs62098462	18	34504364	DTNA	t	c	111	-0.539	+-	0.5901	0.870024
	Grey_Matter_Volume	Longitudinal	rs75127284	18	34506592	DTNA	a	c	111	-1.08	--	0.2803	0.776541
	Grey_Matter_Volume	Longitudinal	rs2439861	18	34507940	DTNA	a	g	111	0.751	+-	0.4524	0.788949
	Grey_Matter_Volume	Longitudinal	rs35982920	18	34516411	DTNA	a	g	111	0.641	+-	0.5217	0.81982
	Grey_Matter_Volume	Longitudinal	rs2509597	18	34528430	DTNA	a	t	111	1.525	+-	0.1273	0.636622
	Grey_Matter_Volume	Longitudinal	rs71363449	18	34531997	DTNA	t	c	111	-1.786	--	0.07404	0.636622
	Grey_Matter_Volume	Longitudinal	rs2439853	18	34533937	DTNA	a	g	111	-1.507	--	0.1318	0.636622
	Grey_Matter_Volume	Longitudinal	rs2439000	18	34536414	DTNA	c	g	111	0.206	+-	0.8367	0.941594
	Grey_Matter_Volume	Longitudinal	rs11875892	18	34544032	DTNA	a	g	111	0.11	+-	0.9124	0.976553
	Grey_Matter_Volume	Longitudinal	rs1967583	18	34544573	DTNA	t	c	111	-0.178	+-	0.8585	0.955796
	Grey_Matter_Volume	Longitudinal	rs28856895	18	34555507	DTNA	a	g	111	-1.014	--	0.3107	0.776541
	Grey_Matter_Volume	Longitudinal	rs77973497	18	34560529	DTNA	a	c	111	0.256	-+	0.7977	0.941436
	Grey_Matter_Volume	Longitudinal	rs2579796	18	34569243	DTNA	a	g	111	-1.452	--	0.1466	0.636622
	Grey_Matter_Volume	Longitudinal	rs2579797	18	34571732	DTNA	t	g	111	-0.264	-+	0.7916	0.941436
	Grey_Matter_Volume	Longitudinal	rs2685557	18	34576782	DTNA	t	c	111	-1.452	--	0.1466	0.636622
	Grey_Matter_Volume	Longitudinal	rs9958492	18	34577783	DTNA	t	c	111	-1.827	--	0.06772	0.636622
	Grey_Matter_Volume	Longitudinal	rs2579802	18	34579787	DTNA	a	c	111	0.36	++	0.7191	0.904947
	Grey_Matter_Volume	Longitudinal	rs74920018	18	34607557	DTNA	a	t	111	0.432	++	0.6661	0.904947
	Grey_Matter_Volume	Longitudinal	rs1439127	18	34607759	DTNA	a	t	111	-1.304	--	0.1922	0.731428
	Grey_Matter_Volume	Longitudinal	rs12327368	18	34611361	DTNA	a	g	111	-1.827	--	0.06772	0.636622
	Grey_Matter_Volume	Longitudinal	rs62097188	18	34611412	DTNA	a	g	111	0.674	-+	0.5001	0.812652
	Grey_Matter_Volume	Longitudinal	rs9807153	18	34635520	DTNA	a	t	111	0.738	++	0.4607	0.788949
	Grey_Matter_Volume	Longitudinal	rs2730126	18	34635939	DTNA	a	c	111	-1.1	--	0.2714	0.776541
	Grey_Matter_Volume	Longitudinal	rs1659526	18	34644451	DTNA	a	g	111	-0.126	-+	0.8998	0.97065
	Grey_Matter_Volume	Longitudinal	rs17642885	18	34649976	DTNA	t	c	111	0.944	++	0.3452	0.776541
	Grey_Matter_Volume	Longitudinal	rs1240974	18	34650949	DTNA	t	c	111	-0.158	-+	0.8744	0.958342
	Grey_Matter_Volume	Longitudinal	rs55869511	18	34651262	DTNA	a	c	111	2.329	++	0.01988	0.52197
	Grey_Matter_Volume	Longitudinal	rs12955208	18	34656737	DTNA	a	g	111	1.527	++	0.1268	0.636622
	Grey_Matter_Volume	Longitudinal	rs72953203	18	34660068	DTNA	a	g	111	0.204	+-	0.8385	0.941594
	Grey_Matter_Volume	Longitudinal	rs9946070	18	34665505	DTNA	a	g	111	-2.178	--	0.02939	0.52197
	Grey_Matter_Volume	Longitudinal	rs72953211	18	34673381	DTNA	a	c	111	0.75	+-	0.4535	0.788949
	Grey_Matter_Volume	Longitudinal	rs55971592	18	34697328	DTNA	a	g	111	0.248	+-	0.804	0.941436
	Grey_Matter_Volume	Longitudinal	rs78837792	18	34703359	DTNA	t	c	111	-0.91	-+	0.363	0.776541
	Grey_Matter_Volume	Longitudinal	rs11663468	18	34707936	DTNA	t	c	111	-0.908	-+	0.364	0.776541
	Grey_Matter_Volume	Longitudinal	rs12963825	18	34709484	DTNA	a	g	111	-1.642	-+	0.1007	0.636622
	Grey_Matter_Volume	Longitudinal	rs1480432	18	34727166	DTNA	t	g	111	-1.017	-+	0.309	0.776541
	Grey_Matter_Volume	Longitudinal	rs45556134	18	34729425	DTNA	a	g	111	0.099	-+	0.9212	0.978329
	Grey_Matter_Volume	Longitudinal	rs899828	18	34732688	DTNA	t	g	111	0.702	-+	0.4828	0.796911
	Grey_Matter_Volume	Longitudinal	rs17556884	18	34736455	DTNA	t	c	111	2.164	++	0.03048	0.52197
	Grey_Matter_Volume	Longitudinal	rs1480428	18	34738732	DTNA	a	g	111	2.294	++	0.02179	0.52197
	Grey_Matter_Volume	Longitudinal	rs12957349	18	34739291	DTNA	t	c	111	1.527	++	0.1268	0.636622
	Grey_Matter_Volume	Longitudinal	rs12608110	18	34752198	DTNA	a	g	111	1.055	++	0.2913	0.776541
	Grey_Matter_Volume	Longitudinal	rs7228547	18	34760039	DTNA	a	g	111	0.908	+-	0.364	0.776541
	Grey_Matter_Volume	Longitudinal	rs8099437	18	34761448	DTNA	t	g	111	2.294	++	0.02179	0.52197
	Grey_Matter_Volume	Longitudinal	rs72955132	18	34762382	DTNA	a	g	111	2.164	++	0.03048	0.52197
	Grey_Matter_Volume	Longitudinal	rs1817452	18	34776629	DTNA	t	c	111	1.569	++	0.1165	0.636622
	Grey_Matter_Volume	Longitudinal	rs56404226	18	34778060	DTNA	a	g	111	-1.4	--	0.1616	0.651153
	Grey_Matter_Volume	Longitudinal	rs72955175	18	34779045	DTNA	a	t	111	1.253	+-	0.2101	0.776541
	Grey_Matter_Volume	Longitudinal	rs12608251	18	34782906	DTNA	t	g	111	-0.229	-+	0.8185	0.941594
	Grey_Matter_Volume	Longitudinal	rs76880720	18	34791141	DTNA	a	c	111	-0.861	+-	0.3895	0.780514
	Grey_Matter_Volume	Longitudinal	rs9989533	18	34793909	DTNA	t	c	111	1.477	++	0.1396	0.636622
	Grey_Matter_Volume	Longitudinal	rs79500711	18	34794379	DTNA	a	g	111	-0.312	+-	0.755	0.923527
	Grey_Matter_Volume	Longitudinal	rs138856611	18	34801684	DTNA	t	g	111	0.668	-+	0.5042	0.812652
	Grey_Matter_Volume	Longitudinal	rs62097226	18	34804223	DTNA	a	t	111	-0.9	--	0.3682	0.776541
	Grey_Matter_Volume	Longitudinal	rs4458079	18	34806161	DTNA	t	c	111	0.132	+-	0.8953	0.97065
	Grey_Matter_Volume	Longitudinal	rs8086358	18	34813672	DTNA	t	g	111	-0.854	-+	0.3934	0.780514
	Grey_Matter_Volume	Longitudinal	rs72963047	18	34818804	DTNA	a	c	111	0.518	-+	0.6043	0.874945
	Grey_Matter_Volume	Longitudinal	rs17557660	18	34831178	DTNA	a	t	111	1.666	++	0.09573	0.636622
	Grey_Matter_Volume	Longitudinal	rs1790533	18	34831631	DTNA	a	g	111	-0.479	-+	0.6322	0.892901
	Grey_Matter_Volume	Longitudinal	rs4799782	18	34841123	DTNA	a	g	111	-0.702	+-	0.4828	0.796911
	Grey_Matter_Volume	Longitudinal	rs1786604	18	34846264	DTNA	a	g	111	1.411	++	0.1581	0.651153
	Grey_Matter_Volume	Longitudinal	rs7233779	18	34863262	DTNA	a	g	111	-0.081	-+	0.9358	0.986189
	Grey_Matter_Volume	Longitudinal	rs644982	18	34869793	DTNA	a	g	111	-1.507	-+	0.1317	0.636622
	Grey_Matter_Volume	Longitudinal	rs11659517	18	34870978	DTNA	a	t	111	0.889	-+	0.3741	0.776541
	Grey_Matter_Volume	Longitudinal	rs524969	18	34872102	DTNA	a	t	111	0.757	+-	0.4492	0.788949
	Grey_Matter_Volume	Longitudinal	rs637914	18	34876135	DTNA	a	t	111	0.758	+-	0.4485	0.788949
	Grey_Matter_Volume	Longitudinal	rs9304141	18	34879143	DTNA	t	c	111	-0.036	-+	0.9709	0.9952
	Grey_Matter_Volume	Longitudinal	rs2288085	18	34879740	DTNA	a	g	111	-1.497	--	0.1343	0.636622
	Grey_Matter_Volume	Longitudinal	rs17558116	18	34882719	DTNA	t	c	111	0.802	-+	0.4223	0.788949
	Grey_Matter_Volume	Longitudinal	rs10502637	18	34890006	DTNA	t	c	111	-0.313	-+	0.7541	0.923527
	Grey_Matter_Volume	Longitudinal	rs149163416	18	34898841	DTNA	a	g	111	1.444	++	0.1487	0.636622
	Grey_Matter_Volume	Longitudinal	20:33413780	20	33413780	SNTA1	a	t	111	-2.319	--	0.02037	0.52197
	Grey_Matter_Volume	Longitudinal	rs291683	20	33431611	SNTA1	t	c	111	1.079	-+	0.2807	0.776541
	Grey_Matter_Volume	Longitudinal	20:33433270	20	33433270	SNTA1	t	c	111	-0.712	+-	0.4767	0.796911
	Grey_Matter_Volume	Longitudinal	rs6141396	20	33436147	SNTA1	a	c	47	1.788	+?	0.0738	0.636622
	Grey_Matter_Volume	Longitudinal	rs293721	20	33441633	SNTA1	t	c	111	0.834	-+	0.4045	0.780514
	Hippocampal_Volume	Cross-Sectional	rs111599092	3	49465346	DAG1	a	g	676	0.01	+-+-	0.9917	0.998992
	Hippocampal_Volume	Cross-Sectional	rs73073015	3	49465733	DAG1	a	g	676	1.704	-+-+	0.08833	0.592194
	Hippocampal_Volume	Cross-Sectional	rs7611164	3	49471395	DAG1	t	g	676	-0.357	-+-+	0.7214	0.940272
	Hippocampal_Volume	Cross-Sectional	rs1568661	3	49483525	DAG1	a	g	676	1.498	++++	0.134	0.592194
	Hippocampal_Volume	Cross-Sectional	rs7374731	3	49495661	DAG1	c	g	676	2.155	++++	0.03114	0.47402
	Hippocampal_Volume	Cross-Sectional	rs73074811	3	49516098	DAG1	a	t	676	-1.09	----	0.2757	0.791556
	Hippocampal_Volume	Cross-Sectional	rs3870338	3	49519618	DAG1	a	g	676	1.498	++++	0.134	0.592194
	Hippocampal_Volume	Cross-Sectional	rs55935606	3	49528072	DAG1	a	g	676	-2.32	----	0.02033	0.464202
	Hippocampal_Volume	Cross-Sectional	rs75153130	3	49530436	DAG1	a	c	676	0.357	+-+-	0.7214	0.940272
	Hippocampal_Volume	Cross-Sectional	rs13079082	3	49537375	DAG1	c	g	676	-0.013	+-+-	0.9895	0.998992
	Hippocampal_Volume	Cross-Sectional	rs4052546	3	49538116	DAG1	c	g	676	-2.155	----	0.03114	0.47402
	Hippocampal_Volume	Cross-Sectional	rs73074830	3	49539584	DAG1	a	c	676	0.123	-+-+	0.9019	0.983356
	Hippocampal_Volume	Cross-Sectional	rs114093899	3	49539955	DAG1	c	g	676	-1.358	----	0.1745	0.664069
	Hippocampal_Volume	Cross-Sectional	rs9789109	18	26842291	AQP4	a	g	676	0.134	-+-+	0.8935	0.983356
	Hippocampal_Volume	Cross-Sectional	rs10164026	18	26842362	AQP4	a	c	676	-1.918	----	0.05517	0.592194
	Hippocampal_Volume	Cross-Sectional	rs4800270	18	26844933	AQP4	t	g	676	0.881	++++	0.3786	0.803301
	Hippocampal_Volume	Cross-Sectional	rs79668602	18	26845488	AQP4	a	g	676	-0.12	+-+-	0.9044	0.983356
	Hippocampal_Volume	Cross-Sectional	rs12458416	18	26847267	AQP4	c	g	676	0.24	-+-+	0.8106	0.958882
	Hippocampal_Volume	Cross-Sectional	rs12953446	18	26848521	AQP4	a	g	676	1.53	-+-+	0.126	0.592194
	Hippocampal_Volume	Cross-Sectional	rs67461489	18	26848876	AQP4	t	c	676	-2.429	----	0.01514	0.464202
	Hippocampal_Volume	Cross-Sectional	rs11661081	18	26850068	AQP4	a	c	676	-0.783	-+-+	0.4335	0.803301
	Hippocampal_Volume	Cross-Sectional	rs3763043	18	26855854	AQP4	t	c	676	-0.817	+-+-	0.4138	0.803301
	Hippocampal_Volume	Cross-Sectional	rs68006382	18	26856555	AQP4	a	g	676	0.503	-+-+	0.615	0.931898
	Hippocampal_Volume	Cross-Sectional	rs335930	18	26856961	AQP4	a	c	676	-0.344	+-+-	0.7307	0.940272
	Hippocampal_Volume	Cross-Sectional	rs71353405	18	26857429	AQP4	t	c	676	0.019	+-+-	0.9849	0.998992
	Hippocampal_Volume	Cross-Sectional	rs162009	18	26864250	AQP4	a	g	676	0.987	-+-+	0.3238	0.791556
	Hippocampal_Volume	Cross-Sectional	rs4800773	18	26865017	AQP4	a	g	676	0.102	-+-+	0.9186	0.986507
	Hippocampal_Volume	Cross-Sectional	rs3875089	18	26865469	AQP4	t	c	676	-1.595	----	0.1107	0.592194
	Hippocampal_Volume	Cross-Sectional	rs72878787	18	26866517	AQP4	a	g	676	0.734	++++	0.4632	0.823015
	Hippocampal_Volume	Cross-Sectional	rs162006	18	26866570	AQP4	t	c	676	-0.8	----	0.4237	0.803301
	Hippocampal_Volume	Cross-Sectional	rs151244	18	26866755	AQP4	t	c	676	-0.927	+-+-	0.354	0.791556
	Hippocampal_Volume	Cross-Sectional	rs72878794	18	26866839	AQP4	t	c	676	-1.911	----	0.05599	0.592194
	Hippocampal_Volume	Cross-Sectional	rs9961118	18	26866901	AQP4	t	c	676	1.233	++++	0.2174	0.744595
	Hippocampal_Volume	Cross-Sectional	rs162004	18	26867972	AQP4	c	g	676	1.043	++++	0.297	0.791556
	Hippocampal_Volume	Cross-Sectional	rs72878799	18	26868165	AQP4	a	g	676	0.514	++++	0.6073	0.931898
	Hippocampal_Volume	Cross-Sectional	rs11662318	18	26869056	AQP4	t	c	676	2.576	++++	0.009984	0.464202
	Hippocampal_Volume	Cross-Sectional	rs151246	18	26869139	AQP4	t	g	676	-0.912	----	0.3618	0.791556
	Hippocampal_Volume	Cross-Sectional	rs491148	18	26869803	AQP4	a	g	676	-1.63	----	0.1031	0.592194
	Hippocampal_Volume	Cross-Sectional	rs162002	18	26871015	AQP4	a	g	676	-0.421	+-+-	0.6737	0.940272
	Hippocampal_Volume	Cross-Sectional	rs162001	18	26871481	AQP4	a	c	676	-1.579	----	0.1144	0.592194
	Hippocampal_Volume	Cross-Sectional	rs3865411	18	26871684	AQP4	a	g	676	0.76	++++	0.4474	0.817251
	Hippocampal_Volume	Cross-Sectional	rs162000	18	26872471	AQP4	a	c	676	-0.192	-+-+	0.8476	0.962032
	Hippocampal_Volume	Cross-Sectional	rs12969503	18	26873564	AQP4	t	g	676	-0.984	----	0.3249	0.791556
	Hippocampal_Volume	Cross-Sectional	rs8094228	18	26873767	AQP4	t	c	676	1.01	++++	0.3123	0.791556
	Hippocampal_Volume	Cross-Sectional	rs480647	18	26874290	AQP4	t	c	676	-0.783	+-+-	0.4339	0.803301
	Hippocampal_Volume	Cross-Sectional	rs10502478	18	26874616	AQP4	a	c	676	-1.656	-+-+	0.09767	0.592194
	Hippocampal_Volume	Cross-Sectional	rs7234562	18	34483685	DTNA	t	c	676	1.583	++++	0.1133	0.592194
	Hippocampal_Volume	Cross-Sectional	rs79922046	18	34485536	DTNA	a	g	676	0.919	++++	0.3581	0.791556
	Hippocampal_Volume	Cross-Sectional	rs9955950	18	34485672	DTNA	t	c	676	1.096	++++	0.2729	0.791556
	Hippocampal_Volume	Cross-Sectional	rs12957028	18	34485948	DTNA	a	g	676	-1.201	----	0.2296	0.748933
	Hippocampal_Volume	Cross-Sectional	rs72639491	18	34491438	DTNA	a	g	676	0.38	-+-+	0.7041	0.940272
	Hippocampal_Volume	Cross-Sectional	rs62097347	18	34492032	DTNA	c	g	676	-2.334	----	0.01957	0.464202
	Hippocampal_Volume	Cross-Sectional	rs9961251	18	34492344	DTNA	t	c	676	0.07	-+-+	0.9445	0.995358
	Hippocampal_Volume	Cross-Sectional	rs111846993	18	34494001	DTNA	t	c	676	-1.151	-+-+	0.2498	0.777786
	Hippocampal_Volume	Cross-Sectional	rs4799769	18	34494577	DTNA	c	g	676	-0.383	-+-+	0.7018	0.940272
	Hippocampal_Volume	Cross-Sectional	rs8092794	18	34496273	DTNA	a	g	676	-0.931	+-+-	0.352	0.791556
	Hippocampal_Volume	Cross-Sectional	rs7243528	18	34497055	DTNA	t	c	676	-1.744	----	0.08113	0.592194
	Hippocampal_Volume	Cross-Sectional	rs79972565	18	34497194	DTNA	t	g	676	-1.829	----	0.06744	0.592194
	Hippocampal_Volume	Cross-Sectional	rs35839923	18	34497764	DTNA	a	g	676	0.221	+-+-	0.8247	0.962032
	Hippocampal_Volume	Cross-Sectional	rs62097349	18	34499519	DTNA	a	g	676	1.502	++++	0.133	0.592194
	Hippocampal_Volume	Cross-Sectional	rs9965622	18	34502153	DTNA	t	c	676	-2.82	+-+-	0.004805	0.464202
	Hippocampal_Volume	Cross-Sectional	rs62098462	18	34504364	DTNA	t	c	676	1.801	++++	0.07177	0.592194
	Hippocampal_Volume	Cross-Sectional	rs75127284	18	34506592	DTNA	a	c	676	-0.086	-+-+	0.9318	0.989586
	Hippocampal_Volume	Cross-Sectional	rs2439861	18	34507940	DTNA	a	g	676	-0.202	+-+-	0.8399	0.962032
	Hippocampal_Volume	Cross-Sectional	rs35982920	18	34516411	DTNA	a	g	676	-0.582	----	0.5605	0.89289
	Hippocampal_Volume	Cross-Sectional	rs2509597	18	34528430	DTNA	a	t	676	-1.693	----	0.09045	0.592194
	Hippocampal_Volume	Cross-Sectional	rs71363449	18	34531997	DTNA	t	c	676	0.797	+-+-	0.4257	0.803301
	Hippocampal_Volume	Cross-Sectional	rs2439853	18	34533937	DTNA	a	g	676	0.336	+-+-	0.7371	0.940272
	Hippocampal_Volume	Cross-Sectional	rs2439000	18	34536414	DTNA	c	g	676	0.325	-+-+	0.745	0.940272
	Hippocampal_Volume	Cross-Sectional	rs11875892	18	34544032	DTNA	a	g	676	-0.655	+-+-	0.5124	0.836189
	Hippocampal_Volume	Cross-Sectional	rs1967583	18	34544573	DTNA	t	c	676	0.338	-+-+	0.7353	0.940272
	Hippocampal_Volume	Cross-Sectional	rs28856895	18	34555507	DTNA	a	g	676	1.395	++++	0.1631	0.657197
	Hippocampal_Volume	Cross-Sectional	rs77973497	18	34560529	DTNA	a	c	676	1.701	++++	0.0889	0.592194
	Hippocampal_Volume	Cross-Sectional	rs2579796	18	34569243	DTNA	a	g	676	0.418	+-+-	0.6756	0.940272
	Hippocampal_Volume	Cross-Sectional	rs2579797	18	34571732	DTNA	t	g	676	-0.285	+-+-	0.776	0.957766
	Hippocampal_Volume	Cross-Sectional	rs2685557	18	34576782	DTNA	t	c	676	0.239	+-+-	0.8111	0.958882
	Hippocampal_Volume	Cross-Sectional	rs9958492	18	34577783	DTNA	t	c	676	0.947	++++	0.3439	0.791556
	Hippocampal_Volume	Cross-Sectional	rs2579802	18	34579787	DTNA	a	c	676	-0.908	+-+-	0.364	0.791556
	Hippocampal_Volume	Cross-Sectional	rs74920018	18	34607557	DTNA	a	t	676	1.37	++++	0.1707	0.664069
	Hippocampal_Volume	Cross-Sectional	rs1439127	18	34607759	DTNA	a	t	676	1.082	-+-+	0.2791	0.791556
	Hippocampal_Volume	Cross-Sectional	rs12327368	18	34611361	DTNA	a	g	676	1.216	++++	0.224	0.748488
	Hippocampal_Volume	Cross-Sectional	rs62097188	18	34611412	DTNA	a	g	676	1.515	+-+-	0.1299	0.592194
	Hippocampal_Volume	Cross-Sectional	rs9807153	18	34635520	DTNA	a	t	676	1.691	++++	0.09074	0.592194
	Hippocampal_Volume	Cross-Sectional	rs2730126	18	34635939	DTNA	a	c	676	-0.023	+-+-	0.9813	0.998992
	Hippocampal_Volume	Cross-Sectional	rs1659526	18	34644451	DTNA	a	g	676	-0.696	----	0.4866	0.823015
	Hippocampal_Volume	Cross-Sectional	rs17642885	18	34649976	DTNA	t	c	676	-1.269	+-+-	0.2043	0.736555
	Hippocampal_Volume	Cross-Sectional	rs1240974	18	34650949	DTNA	t	c	676	-0.321	----	0.7481	0.940272
	Hippocampal_Volume	Cross-Sectional	rs55869511	18	34651262	DTNA	a	c	676	-1.531	----	0.1258	0.592194
	Hippocampal_Volume	Cross-Sectional	rs12955208	18	34656737	DTNA	a	g	676	0.491	-+-+	0.6231	0.931898
	Hippocampal_Volume	Cross-Sectional	rs72953203	18	34660068	DTNA	a	g	676	0.304	+-+-	0.761	0.947791
	Hippocampal_Volume	Cross-Sectional	rs9946070	18	34665505	DTNA	a	g	676	0.708	++++	0.4791	0.823015
	Hippocampal_Volume	Cross-Sectional	rs72953211	18	34673381	DTNA	a	c	676	0.183	-+-+	0.8552	0.962032
	Hippocampal_Volume	Cross-Sectional	rs55971592	18	34697328	DTNA	a	g	676	-0.19	-+-+	0.8491	0.962032
	Hippocampal_Volume	Cross-Sectional	rs78837792	18	34703359	DTNA	t	c	676	0.264	-+-+	0.7917	0.958882
	Hippocampal_Volume	Cross-Sectional	rs11663468	18	34707936	DTNA	t	c	676	0.098	+-+-	0.9217	0.986507
	Hippocampal_Volume	Cross-Sectional	rs12963825	18	34709484	DTNA	a	g	676	1.24	++++	0.2151	0.744595
	Hippocampal_Volume	Cross-Sectional	rs1480432	18	34727166	DTNA	t	g	676	0.404	-+-+	0.6859	0.940272
	Hippocampal_Volume	Cross-Sectional	rs45556134	18	34729425	DTNA	a	g	676	1.533	+-+-	0.1253	0.592194
	Hippocampal_Volume	Cross-Sectional	rs899828	18	34732688	DTNA	t	g	676	0.661	-+-+	0.5086	0.836189
	Hippocampal_Volume	Cross-Sectional	rs17556884	18	34736455	DTNA	t	c	676	-0.699	----	0.4847	0.823015
	Hippocampal_Volume	Cross-Sectional	rs1480428	18	34738732	DTNA	a	g	676	-0.568	----	0.5699	0.897429
	Hippocampal_Volume	Cross-Sectional	rs12957349	18	34739291	DTNA	t	c	676	0	-+-+	0.9999	0.9999
	Hippocampal_Volume	Cross-Sectional	rs12608110	18	34752198	DTNA	a	g	676	0.168	+-+-	0.8665	0.965126
	Hippocampal_Volume	Cross-Sectional	rs7228547	18	34760039	DTNA	a	g	676	-0.412	----	0.6804	0.940272
	Hippocampal_Volume	Cross-Sectional	rs8099437	18	34761448	DTNA	t	g	676	-0.929	----	0.353	0.791556
	Hippocampal_Volume	Cross-Sectional	rs72955132	18	34762382	DTNA	a	g	676	-0.706	----	0.4803	0.823015
	Hippocampal_Volume	Cross-Sectional	rs1817452	18	34776629	DTNA	t	c	676	0.416	-+-+	0.6777	0.940272
	Hippocampal_Volume	Cross-Sectional	rs56404226	18	34778060	DTNA	a	g	676	-0.871	-+-+	0.384	0.803301
	Hippocampal_Volume	Cross-Sectional	rs72955175	18	34779045	DTNA	a	t	676	-0.488	-+-+	0.6258	0.931898
	Hippocampal_Volume	Cross-Sectional	rs12608251	18	34782906	DTNA	t	g	676	0.271	-+-+	0.7863	0.958882
	Hippocampal_Volume	Cross-Sectional	rs76880720	18	34791141	DTNA	a	c	676	-0.6	+-+-	0.5487	0.884375
	Hippocampal_Volume	Cross-Sectional	rs9989533	18	34793909	DTNA	t	c	676	-0.181	+-+-	0.8567	0.962032
	Hippocampal_Volume	Cross-Sectional	rs79500711	18	34794379	DTNA	a	g	676	-1.085	+-+-	0.2778	0.791556
	Hippocampal_Volume	Cross-Sectional	rs138856611	18	34801684	DTNA	t	g	676	0.238	+-+-	0.8119	0.958882
	Hippocampal_Volume	Cross-Sectional	rs62097226	18	34804223	DTNA	a	t	676	-0.322	-+-+	0.7477	0.940272
	Hippocampal_Volume	Cross-Sectional	rs4458079	18	34806161	DTNA	t	c	676	-0.843	----	0.3991	0.803301
	Hippocampal_Volume	Cross-Sectional	rs8086358	18	34813672	DTNA	t	g	676	0.375	+-+-	0.7079	0.940272
	Hippocampal_Volume	Cross-Sectional	rs72963047	18	34818804	DTNA	a	c	676	-0.721	----	0.471	0.823015
	Hippocampal_Volume	Cross-Sectional	rs17557660	18	34831178	DTNA	a	t	676	1.592	++++	0.1114	0.592194
	Hippocampal_Volume	Cross-Sectional	rs1790533	18	34831631	DTNA	a	g	676	1.178	-+-+	0.2389	0.761147
	Hippocampal_Volume	Cross-Sectional	rs4799782	18	34841123	DTNA	a	g	676	-0.37	-+-+	0.7112	0.940272
	Hippocampal_Volume	Cross-Sectional	rs1786604	18	34846264	DTNA	a	g	676	-0.52	-+-+	0.603	0.931898
	Hippocampal_Volume	Cross-Sectional	rs7233779	18	34863262	DTNA	a	g	676	-0.049	-+-+	0.9611	0.997505
	Hippocampal_Volume	Cross-Sectional	rs644982	18	34869793	DTNA	a	g	676	0.795	++++	0.4266	0.803301
	Hippocampal_Volume	Cross-Sectional	rs11659517	18	34870978	DTNA	a	t	676	0.655	-+-+	0.5127	0.836189
	Hippocampal_Volume	Cross-Sectional	rs524969	18	34872102	DTNA	a	t	676	-0.96	+-+-	0.3373	0.791556
	Hippocampal_Volume	Cross-Sectional	rs637914	18	34876135	DTNA	a	t	676	-1.442	+-+-	0.1494	0.620236
	Hippocampal_Volume	Cross-Sectional	rs9304141	18	34879143	DTNA	t	c	676	0.816	++++	0.4145	0.803301
	Hippocampal_Volume	Cross-Sectional	rs2288085	18	34879740	DTNA	a	g	676	-0.978	----	0.3281	0.791556
	Hippocampal_Volume	Cross-Sectional	rs17558116	18	34882719	DTNA	t	c	676	0.992	-+-+	0.3212	0.791556
	Hippocampal_Volume	Cross-Sectional	rs10502637	18	34890006	DTNA	t	c	676	0.052	-+-+	0.9583	0.997505
	Hippocampal_Volume	Cross-Sectional	rs149163416	18	34898841	DTNA	a	g	676	0.95	++++	0.3422	0.791556
	Hippocampal_Volume	Cross-Sectional	20:33413780	20	33413780	SNTA1	a	t	676	0.813	-+-+	0.4161	0.803301
	Hippocampal_Volume	Cross-Sectional	rs291683	20	33431611	SNTA1	t	c	676	-1.279	----	0.2011	0.736555
	Hippocampal_Volume	Cross-Sectional	20:33433270	20	33433270	SNTA1	t	c	676	2.25	++++	0.02448	0.47402
	Hippocampal_Volume	Cross-Sectional	rs6141396	20	33436147	SNTA1	a	c	186	1.463	+?+?	0.1435	0.614359
	Hippocampal_Volume	Cross-Sectional	rs293721	20	33441633	SNTA1	t	c	676	-2.415	----	0.01575	0.464202
	Hippocampal_Volume	Longitudinal	rs111599092	3	49465346	DAG1	a	g	111	0.17	-+	0.8652	0.975376
	Hippocampal_Volume	Longitudinal	rs73073015	3	49465733	DAG1	a	g	111	0.972	++	0.3312	0.97407
	Hippocampal_Volume	Longitudinal	rs7611164	3	49471395	DAG1	t	g	111	-0.676	+-	0.4989	0.97407
	Hippocampal_Volume	Longitudinal	rs1568661	3	49483525	DAG1	a	g	111	0.882	-+	0.3778	0.97407
	Hippocampal_Volume	Longitudinal	rs7374731	3	49495661	DAG1	c	g	111	0.736	-+	0.4617	0.97407
	Hippocampal_Volume	Longitudinal	rs73074811	3	49516098	DAG1	a	t	111	0.165	+-	0.8691	0.975376
	Hippocampal_Volume	Longitudinal	rs3870338	3	49519618	DAG1	a	g	111	0.882	-+	0.3778	0.97407
	Hippocampal_Volume	Longitudinal	rs55935606	3	49528072	DAG1	a	g	111	-1.53	--	0.1261	0.97407
	Hippocampal_Volume	Longitudinal	rs75153130	3	49530436	DAG1	a	c	111	0.676	-+	0.4989	0.97407
	Hippocampal_Volume	Longitudinal	rs13079082	3	49537375	DAG1	c	g	111	-0.222	--	0.8245	0.97407
	Hippocampal_Volume	Longitudinal	rs4052546	3	49538116	DAG1	c	g	111	-0.736	+-	0.4617	0.97407
	Hippocampal_Volume	Longitudinal	rs73074830	3	49539584	DAG1	a	c	111	-0.286	--	0.7749	0.97407
	Hippocampal_Volume	Longitudinal	rs114093899	3	49539955	DAG1	c	g	111	-0.286	+-	0.7746	0.97407
	Hippocampal_Volume	Longitudinal	rs9789109	18	26842291	AQP4	a	g	111	-0.973	--	0.3304	0.97407
	Hippocampal_Volume	Longitudinal	rs10164026	18	26842362	AQP4	a	c	111	-0.335	--	0.7378	0.97407
	Hippocampal_Volume	Longitudinal	rs4800270	18	26844933	AQP4	t	g	111	-0.856	+-	0.3919	0.97407
	Hippocampal_Volume	Longitudinal	rs79668602	18	26845488	AQP4	a	g	111	-3.328	--	0.0008743	0.119779
	Hippocampal_Volume	Longitudinal	rs12458416	18	26847267	AQP4	c	g	111	-0.633	-+	0.5267	0.97407
	Hippocampal_Volume	Longitudinal	rs12953446	18	26848521	AQP4	a	g	111	0.906	++	0.365	0.97407
	Hippocampal_Volume	Longitudinal	rs67461489	18	26848876	AQP4	t	c	111	-0.351	--	0.7259	0.97407
	Hippocampal_Volume	Longitudinal	rs11661081	18	26850068	AQP4	a	c	111	1.321	++	0.1864	0.97407
	Hippocampal_Volume	Longitudinal	rs3763043	18	26855854	AQP4	t	c	111	-2.357	--	0.01843	0.841637
	Hippocampal_Volume	Longitudinal	rs68006382	18	26856555	AQP4	a	g	111	2.869	++	0.004114	0.281809
	Hippocampal_Volume	Longitudinal	rs335930	18	26856961	AQP4	a	c	111	-0.484	--	0.6285	0.97407
	Hippocampal_Volume	Longitudinal	rs71353405	18	26857429	AQP4	t	c	111	0.835	++	0.4037	0.97407
	Hippocampal_Volume	Longitudinal	rs162009	18	26864250	AQP4	a	g	111	0.584	-+	0.5591	0.97407
	Hippocampal_Volume	Longitudinal	rs4800773	18	26865017	AQP4	a	g	111	-0.44	--	0.6598	0.97407
	Hippocampal_Volume	Longitudinal	rs3875089	18	26865469	AQP4	t	c	111	0.763	++	0.4455	0.97407
	Hippocampal_Volume	Longitudinal	rs72878787	18	26866517	AQP4	a	g	111	-1.418	--	0.1561	0.97407
	Hippocampal_Volume	Longitudinal	rs162006	18	26866570	AQP4	t	c	111	0.288	++	0.7737	0.97407
	Hippocampal_Volume	Longitudinal	rs151244	18	26866755	AQP4	t	c	111	-0.856	+-	0.3922	0.97407
	Hippocampal_Volume	Longitudinal	rs72878794	18	26866839	AQP4	t	c	111	-0.353	-+	0.7238	0.97407
	Hippocampal_Volume	Longitudinal	rs9961118	18	26866901	AQP4	t	c	111	1.305	++	0.1917	0.97407
	Hippocampal_Volume	Longitudinal	rs162004	18	26867972	AQP4	c	g	111	0.907	++	0.3643	0.97407
	Hippocampal_Volume	Longitudinal	rs72878799	18	26868165	AQP4	a	g	111	1.131	++	0.2582	0.97407
	Hippocampal_Volume	Longitudinal	rs11662318	18	26869056	AQP4	t	c	111	-0.734	--	0.4632	0.97407
	Hippocampal_Volume	Longitudinal	rs151246	18	26869139	AQP4	t	g	111	1.687	++	0.09158	0.97407
	Hippocampal_Volume	Longitudinal	rs491148	18	26869803	AQP4	a	g	111	1.638	++	0.1015	0.97407
	Hippocampal_Volume	Longitudinal	rs162002	18	26871015	AQP4	a	g	111	0.309	++	0.757	0.97407
	Hippocampal_Volume	Longitudinal	rs162001	18	26871481	AQP4	a	c	111	1.222	++	0.2217	0.97407
	Hippocampal_Volume	Longitudinal	rs3865411	18	26871684	AQP4	a	g	111	-0.219	--	0.8264	0.97407
	Hippocampal_Volume	Longitudinal	rs162000	18	26872471	AQP4	a	c	111	0.508	++	0.6114	0.97407
	Hippocampal_Volume	Longitudinal	rs12969503	18	26873564	AQP4	t	g	111	-0.946	--	0.3443	0.97407
	Hippocampal_Volume	Longitudinal	rs8094228	18	26873767	AQP4	t	c	111	1.265	++	0.2059	0.97407
	Hippocampal_Volume	Longitudinal	rs480647	18	26874290	AQP4	t	c	111	2.116	++	0.03438	0.97407
	Hippocampal_Volume	Longitudinal	rs10502478	18	26874616	AQP4	a	c	111	0.804	++	0.4215	0.97407
	Hippocampal_Volume	Longitudinal	rs7234562	18	34483685	DTNA	t	c	111	-0.267	-+	0.7892	0.97407
	Hippocampal_Volume	Longitudinal	rs79922046	18	34485536	DTNA	a	g	111	0.249	+-	0.8033	0.97407
	Hippocampal_Volume	Longitudinal	rs9955950	18	34485672	DTNA	t	c	111	-0.686	-+	0.4927	0.97407
	Hippocampal_Volume	Longitudinal	rs12957028	18	34485948	DTNA	a	g	111	-0.262	--	0.7932	0.97407
	Hippocampal_Volume	Longitudinal	rs72639491	18	34491438	DTNA	a	g	111	-0.778	-+	0.4369	0.97407
	Hippocampal_Volume	Longitudinal	rs62097347	18	34492032	DTNA	c	g	111	0.383	+-	0.7016	0.97407
	Hippocampal_Volume	Longitudinal	rs9961251	18	34492344	DTNA	t	c	111	0.016	+-	0.9873	0.9903
	Hippocampal_Volume	Longitudinal	rs111846993	18	34494001	DTNA	t	c	111	-0.185	-+	0.8532	0.97407
	Hippocampal_Volume	Longitudinal	rs4799769	18	34494577	DTNA	c	g	111	0.224	+-	0.8225	0.97407
	Hippocampal_Volume	Longitudinal	rs8092794	18	34496273	DTNA	a	g	111	0.327	++	0.7436	0.97407
	Hippocampal_Volume	Longitudinal	rs7243528	18	34497055	DTNA	t	c	111	0.563	+-	0.5737	0.97407
	Hippocampal_Volume	Longitudinal	rs79972565	18	34497194	DTNA	t	g	111	0.979	++	0.3275	0.97407
	Hippocampal_Volume	Longitudinal	rs35839923	18	34497764	DTNA	a	g	111	1.697	++	0.08962	0.97407
	Hippocampal_Volume	Longitudinal	rs62097349	18	34499519	DTNA	a	g	111	0.727	++	0.4672	0.97407
	Hippocampal_Volume	Longitudinal	rs9965622	18	34502153	DTNA	t	c	111	0.863	+-	0.3879	0.97407
	Hippocampal_Volume	Longitudinal	rs62098462	18	34504364	DTNA	t	c	111	-0.404	--	0.6859	0.97407
	Hippocampal_Volume	Longitudinal	rs75127284	18	34506592	DTNA	a	c	111	-0.84	--	0.4007	0.97407
	Hippocampal_Volume	Longitudinal	rs2439861	18	34507940	DTNA	a	g	111	0.728	+-	0.4669	0.97407
	Hippocampal_Volume	Longitudinal	rs35982920	18	34516411	DTNA	a	g	111	-1.626	--	0.104	0.97407
	Hippocampal_Volume	Longitudinal	rs2509597	18	34528430	DTNA	a	t	111	-0.597	+-	0.5505	0.97407
	Hippocampal_Volume	Longitudinal	rs71363449	18	34531997	DTNA	t	c	111	0.921	++	0.3569	0.97407
	Hippocampal_Volume	Longitudinal	rs2439853	18	34533937	DTNA	a	g	111	0.739	++	0.46	0.97407
	Hippocampal_Volume	Longitudinal	rs2439000	18	34536414	DTNA	c	g	111	0.111	+-	0.9113	0.975376
	Hippocampal_Volume	Longitudinal	rs11875892	18	34544032	DTNA	a	g	111	-1.092	--	0.2747	0.97407
	Hippocampal_Volume	Longitudinal	rs1967583	18	34544573	DTNA	t	c	111	-0.012	+-	0.9903	0.9903
	Hippocampal_Volume	Longitudinal	rs28856895	18	34555507	DTNA	a	g	111	0.696	++	0.4863	0.97407
	Hippocampal_Volume	Longitudinal	rs77973497	18	34560529	DTNA	a	c	111	0.653	-+	0.5139	0.97407
	Hippocampal_Volume	Longitudinal	rs2579796	18	34569243	DTNA	a	g	111	0.353	+-	0.7244	0.97407
	Hippocampal_Volume	Longitudinal	rs2579797	18	34571732	DTNA	t	g	111	-0.362	-+	0.7175	0.97407
	Hippocampal_Volume	Longitudinal	rs2685557	18	34576782	DTNA	t	c	111	0.353	+-	0.7244	0.97407
	Hippocampal_Volume	Longitudinal	rs9958492	18	34577783	DTNA	t	c	111	0.5	+-	0.6171	0.97407
	Hippocampal_Volume	Longitudinal	rs2579802	18	34579787	DTNA	a	c	111	-0.307	+-	0.7586	0.97407
	Hippocampal_Volume	Longitudinal	rs74920018	18	34607557	DTNA	a	t	111	0.408	-+	0.6835	0.97407
	Hippocampal_Volume	Longitudinal	rs1439127	18	34607759	DTNA	a	t	111	-1.988	--	0.04676	0.97407
	Hippocampal_Volume	Longitudinal	rs12327368	18	34611361	DTNA	a	g	111	0.5	+-	0.6171	0.97407
	Hippocampal_Volume	Longitudinal	rs62097188	18	34611412	DTNA	a	g	111	-0.023	-+	0.9818	0.9903
	Hippocampal_Volume	Longitudinal	rs9807153	18	34635520	DTNA	a	t	111	-1.088	--	0.2765	0.97407
	Hippocampal_Volume	Longitudinal	rs2730126	18	34635939	DTNA	a	c	111	0.155	+-	0.8767	0.975376
	Hippocampal_Volume	Longitudinal	rs1659526	18	34644451	DTNA	a	g	111	-1.053	--	0.2925	0.97407
	Hippocampal_Volume	Longitudinal	rs17642885	18	34649976	DTNA	t	c	111	1.02	-+	0.3075	0.97407
	Hippocampal_Volume	Longitudinal	rs1240974	18	34650949	DTNA	t	c	111	-0.6	-+	0.5483	0.97407
	Hippocampal_Volume	Longitudinal	rs55869511	18	34651262	DTNA	a	c	111	0.314	-+	0.7538	0.97407
	Hippocampal_Volume	Longitudinal	rs12955208	18	34656737	DTNA	a	g	111	0.346	-+	0.7291	0.97407
	Hippocampal_Volume	Longitudinal	rs72953203	18	34660068	DTNA	a	g	111	0.186	+-	0.8522	0.97407
	Hippocampal_Volume	Longitudinal	rs9946070	18	34665505	DTNA	a	g	111	-0.622	-+	0.5337	0.97407
	Hippocampal_Volume	Longitudinal	rs72953211	18	34673381	DTNA	a	c	111	1.023	+-	0.3065	0.97407
	Hippocampal_Volume	Longitudinal	rs55971592	18	34697328	DTNA	a	g	111	-0.826	--	0.4091	0.97407
	Hippocampal_Volume	Longitudinal	rs78837792	18	34703359	DTNA	t	c	111	-1.159	--	0.2466	0.97407
	Hippocampal_Volume	Longitudinal	rs11663468	18	34707936	DTNA	t	c	111	-0.963	-+	0.3354	0.97407
	Hippocampal_Volume	Longitudinal	rs12963825	18	34709484	DTNA	a	g	111	0.792	++	0.4286	0.97407
	Hippocampal_Volume	Longitudinal	rs1480432	18	34727166	DTNA	t	g	111	-0.113	-+	0.9103	0.975376
	Hippocampal_Volume	Longitudinal	rs45556134	18	34729425	DTNA	a	g	111	0.201	-+	0.8407	0.97407
	Hippocampal_Volume	Longitudinal	rs899828	18	34732688	DTNA	t	g	111	1.175	++	0.2401	0.97407
	Hippocampal_Volume	Longitudinal	rs17556884	18	34736455	DTNA	t	c	111	-0.013	-+	0.9899	0.9903
	Hippocampal_Volume	Longitudinal	rs1480428	18	34738732	DTNA	a	g	111	0.54	+-	0.5893	0.97407
	Hippocampal_Volume	Longitudinal	rs12957349	18	34739291	DTNA	t	c	111	0.346	-+	0.7291	0.97407
	Hippocampal_Volume	Longitudinal	rs12608110	18	34752198	DTNA	a	g	111	-0.339	-+	0.7342	0.97407
	Hippocampal_Volume	Longitudinal	rs7228547	18	34760039	DTNA	a	g	111	0.963	+-	0.3354	0.97407
	Hippocampal_Volume	Longitudinal	rs8099437	18	34761448	DTNA	t	g	111	0.54	+-	0.5893	0.97407
	Hippocampal_Volume	Longitudinal	rs72955132	18	34762382	DTNA	a	g	111	-0.013	-+	0.9899	0.9903
	Hippocampal_Volume	Longitudinal	rs1817452	18	34776629	DTNA	t	c	111	0.13	-+	0.8967	0.975376
	Hippocampal_Volume	Longitudinal	rs56404226	18	34778060	DTNA	a	g	111	0.081	+-	0.9356	0.9903
	Hippocampal_Volume	Longitudinal	rs72955175	18	34779045	DTNA	a	t	111	0.801	+-	0.4231	0.97407
	Hippocampal_Volume	Longitudinal	rs12608251	18	34782906	DTNA	t	g	111	-0.635	-+	0.5257	0.97407
	Hippocampal_Volume	Longitudinal	rs76880720	18	34791141	DTNA	a	c	111	0.016	+-	0.9872	0.9903
	Hippocampal_Volume	Longitudinal	rs9989533	18	34793909	DTNA	t	c	111	0.489	-+	0.625	0.97407
	Hippocampal_Volume	Longitudinal	rs79500711	18	34794379	DTNA	a	g	111	1.062	++	0.2883	0.97407
	Hippocampal_Volume	Longitudinal	rs138856611	18	34801684	DTNA	t	g	111	0.923	++	0.3561	0.97407
	Hippocampal_Volume	Longitudinal	rs62097226	18	34804223	DTNA	a	t	111	0.644	+-	0.5193	0.97407
	Hippocampal_Volume	Longitudinal	rs4458079	18	34806161	DTNA	t	c	111	0.285	+-	0.7755	0.97407
	Hippocampal_Volume	Longitudinal	rs8086358	18	34813672	DTNA	t	g	111	-0.564	-+	0.5726	0.97407
	Hippocampal_Volume	Longitudinal	rs72963047	18	34818804	DTNA	a	c	111	0.143	-+	0.8863	0.975376
	Hippocampal_Volume	Longitudinal	rs17557660	18	34831178	DTNA	a	t	111	1.056	++	0.291	0.97407
	Hippocampal_Volume	Longitudinal	rs1790533	18	34831631	DTNA	a	g	111	-0.633	-+	0.5264	0.97407
	Hippocampal_Volume	Longitudinal	rs4799782	18	34841123	DTNA	a	g	111	-1.106	--	0.2689	0.97407
	Hippocampal_Volume	Longitudinal	rs1786604	18	34846264	DTNA	a	g	111	0.744	+-	0.4567	0.97407
	Hippocampal_Volume	Longitudinal	rs7233779	18	34863262	DTNA	a	g	111	-1.267	--	0.2053	0.97407
	Hippocampal_Volume	Longitudinal	rs644982	18	34869793	DTNA	a	g	111	-0.859	-+	0.3905	0.97407
	Hippocampal_Volume	Longitudinal	rs11659517	18	34870978	DTNA	a	t	111	-0.047	-+	0.9628	0.9903
	Hippocampal_Volume	Longitudinal	rs524969	18	34872102	DTNA	a	t	111	0.775	+-	0.4386	0.97407
	Hippocampal_Volume	Longitudinal	rs637914	18	34876135	DTNA	a	t	111	1.116	+-	0.2643	0.97407
	Hippocampal_Volume	Longitudinal	rs9304141	18	34879143	DTNA	t	c	111	1.449	-+	0.1473	0.97407
	Hippocampal_Volume	Longitudinal	rs2288085	18	34879740	DTNA	a	g	111	0.192	-+	0.8478	0.97407
	Hippocampal_Volume	Longitudinal	rs17558116	18	34882719	DTNA	t	c	111	0.207	+-	0.8357	0.97407
	Hippocampal_Volume	Longitudinal	rs10502637	18	34890006	DTNA	t	c	111	0.3	+-	0.7643	0.97407
	Hippocampal_Volume	Longitudinal	rs149163416	18	34898841	DTNA	a	g	111	-0.112	+-	0.9105	0.975376
	Hippocampal_Volume	Longitudinal	20:33413780	20	33413780	SNTA1	a	t	111	0.066	+-	0.9471	0.9903
	Hippocampal_Volume	Longitudinal	rs291683	20	33431611	SNTA1	t	c	111	1.134	++	0.257	0.97407
	Hippocampal_Volume	Longitudinal	20:33433270	20	33433270	SNTA1	t	c	111	-0.644	--	0.5196	0.97407
	Hippocampal_Volume	Longitudinal	rs6141396	20	33436147	SNTA1	a	c	47	-1.124	-?	0.2611	0.97407
	Hippocampal_Volume	Longitudinal	rs293721	20	33441633	SNTA1	t	c	111	0.35	++	0.7261	0.97407
	PACC	Cross-Sectional	rs111599092	3	49465346	DAG1	a	g	352	0.451	+-	0.6516	0.979398
	PACC	Cross-Sectional	rs73073015	3	49465733	DAG1	a	g	352	-0.542	+-	0.5881	0.979398
	PACC	Cross-Sectional	rs7611164	3	49471395	DAG1	t	g	352	-0.044	-+	0.9651	0.979398
	PACC	Cross-Sectional	rs1568661	3	49483525	DAG1	a	g	352	0.929	++	0.3527	0.907793
	PACC	Cross-Sectional	rs7374731	3	49495661	DAG1	c	g	352	0.834	-+	0.4042	0.907793
	PACC	Cross-Sectional	rs73074811	3	49516098	DAG1	a	t	352	0.156	+-	0.8758	0.979398
	PACC	Cross-Sectional	rs3870338	3	49519618	DAG1	a	g	352	0.929	++	0.3527	0.907793
	PACC	Cross-Sectional	rs55935606	3	49528072	DAG1	a	g	352	-0.224	+-	0.8224	0.979398
	PACC	Cross-Sectional	rs75153130	3	49530436	DAG1	a	c	352	0.044	+-	0.9651	0.979398
	PACC	Cross-Sectional	rs13079082	3	49537375	DAG1	c	g	352	-0.429	-+	0.6681	0.979398
	PACC	Cross-Sectional	rs4052546	3	49538116	DAG1	c	g	352	-0.834	+-	0.4042	0.907793
	PACC	Cross-Sectional	rs73074830	3	49539584	DAG1	a	c	352	-0.55	-+	0.5822	0.979398
	PACC	Cross-Sectional	rs114093899	3	49539955	DAG1	c	g	352	-0.445	-+	0.6564	0.979398
	PACC	Cross-Sectional	rs9789109	18	26842291	AQP4	a	g	352	-1.93	--	0.05359	0.726416
	PACC	Cross-Sectional	rs10164026	18	26842362	AQP4	a	c	352	0.289	++	0.7727	0.979398
	PACC	Cross-Sectional	rs4800270	18	26844933	AQP4	t	g	352	-2.172	--	0.02983	0.726416
	PACC	Cross-Sectional	rs79668602	18	26845488	AQP4	a	g	352	0.369	-+	0.7118	0.979398
	PACC	Cross-Sectional	rs12458416	18	26847267	AQP4	c	g	352	1.41	++	0.1585	0.907793
	PACC	Cross-Sectional	rs12953446	18	26848521	AQP4	a	g	352	-1.819	--	0.06893	0.726416
	PACC	Cross-Sectional	rs67461489	18	26848876	AQP4	t	c	352	-0.89	-+	0.3733	0.907793
	PACC	Cross-Sectional	rs11661081	18	26850068	AQP4	a	c	352	1.08	++	0.2801	0.907793
	PACC	Cross-Sectional	rs3763043	18	26855854	AQP4	t	c	352	-0.878	--	0.3797	0.907793
	PACC	Cross-Sectional	rs68006382	18	26856555	AQP4	a	g	352	-0.227	+-	0.8204	0.979398
	PACC	Cross-Sectional	rs335930	18	26856961	AQP4	a	c	352	1.97	++	0.04883	0.726416
	PACC	Cross-Sectional	rs71353405	18	26857429	AQP4	t	c	352	0.298	+-	0.7654	0.979398
	PACC	Cross-Sectional	rs162009	18	26864250	AQP4	a	g	352	-1.164	+-	0.2443	0.907793
	PACC	Cross-Sectional	rs4800773	18	26865017	AQP4	a	g	352	-0.01	+-	0.992	0.992
	PACC	Cross-Sectional	rs3875089	18	26865469	AQP4	t	c	352	-0.367	-+	0.7134	0.979398
	PACC	Cross-Sectional	rs72878787	18	26866517	AQP4	a	g	352	-0.874	--	0.382	0.907793
	PACC	Cross-Sectional	rs162006	18	26866570	AQP4	t	c	352	-2.333	--	0.01964	0.726416
	PACC	Cross-Sectional	rs151244	18	26866755	AQP4	t	c	352	-0.286	-+	0.775	0.979398
	PACC	Cross-Sectional	rs72878794	18	26866839	AQP4	t	c	352	0.2	+-	0.8413	0.979398
	PACC	Cross-Sectional	rs9961118	18	26866901	AQP4	t	c	352	0.442	++	0.6584	0.979398
	PACC	Cross-Sectional	rs162004	18	26867972	AQP4	c	g	352	1.407	++	0.1595	0.907793
	PACC	Cross-Sectional	rs72878799	18	26868165	AQP4	a	g	352	0.158	+-	0.8743	0.979398
	PACC	Cross-Sectional	rs11662318	18	26869056	AQP4	t	c	352	0.365	+-	0.7151	0.979398
	PACC	Cross-Sectional	rs151246	18	26869139	AQP4	t	g	352	1.404	++	0.1603	0.907793
	PACC	Cross-Sectional	rs491148	18	26869803	AQP4	a	g	352	0.256	-+	0.7982	0.979398
	PACC	Cross-Sectional	rs162002	18	26871015	AQP4	a	g	352	-0.345	-+	0.7298	0.979398
	PACC	Cross-Sectional	rs162001	18	26871481	AQP4	a	c	352	0.178	++	0.8586	0.979398
	PACC	Cross-Sectional	rs3865411	18	26871684	AQP4	a	g	352	-0.608	--	0.5429	0.979398
	PACC	Cross-Sectional	rs162000	18	26872471	AQP4	a	c	352	-0.885	--	0.3761	0.907793
	PACC	Cross-Sectional	rs12969503	18	26873564	AQP4	t	g	352	-0.989	+-	0.3224	0.907793
	PACC	Cross-Sectional	rs8094228	18	26873767	AQP4	t	c	352	1.181	++	0.2374	0.907793
	PACC	Cross-Sectional	rs480647	18	26874290	AQP4	t	c	352	-2.481	--	0.0131	0.726416
	PACC	Cross-Sectional	rs10502478	18	26874616	AQP4	a	c	352	0.231	++	0.8175	0.979398
	PACC	Cross-Sectional	rs7234562	18	34483685	DTNA	t	c	352	0.051	+-	0.9593	0.979398
	PACC	Cross-Sectional	rs79922046	18	34485536	DTNA	a	g	352	0.185	-+	0.8536	0.979398
	PACC	Cross-Sectional	rs9955950	18	34485672	DTNA	t	c	352	0.495	+-	0.6207	0.979398
	PACC	Cross-Sectional	rs12957028	18	34485948	DTNA	a	g	352	-0.405	--	0.6856	0.979398
	PACC	Cross-Sectional	rs72639491	18	34491438	DTNA	a	g	352	-0.586	+-	0.5581	0.979398
	PACC	Cross-Sectional	rs62097347	18	34492032	DTNA	c	g	352	-0.986	--	0.3241	0.907793
	PACC	Cross-Sectional	rs9961251	18	34492344	DTNA	t	c	352	0.323	-+	0.7464	0.979398
	PACC	Cross-Sectional	rs111846993	18	34494001	DTNA	t	c	352	-0.072	-+	0.9422	0.979398
	PACC	Cross-Sectional	rs4799769	18	34494577	DTNA	c	g	352	0.843	-+	0.3993	0.907793
	PACC	Cross-Sectional	rs8092794	18	34496273	DTNA	a	g	352	-0.011	+-	0.9916	0.992
	PACC	Cross-Sectional	rs7243528	18	34497055	DTNA	t	c	352	-0.993	-+	0.3207	0.907793
	PACC	Cross-Sectional	rs79972565	18	34497194	DTNA	t	g	352	-1.196	-+	0.2319	0.907793
	PACC	Cross-Sectional	rs35839923	18	34497764	DTNA	a	g	352	1.058	-+	0.2899	0.907793
	PACC	Cross-Sectional	rs62097349	18	34499519	DTNA	a	g	352	1.33	-+	0.1835	0.907793
	PACC	Cross-Sectional	rs9965622	18	34502153	DTNA	t	c	352	-0.802	+-	0.4227	0.934031
	PACC	Cross-Sectional	rs62098462	18	34504364	DTNA	t	c	352	0.481	++	0.6302	0.979398
	PACC	Cross-Sectional	rs75127284	18	34506592	DTNA	a	c	352	1.306	+-	0.1917	0.907793
	PACC	Cross-Sectional	rs2439861	18	34507940	DTNA	a	g	352	-0.909	--	0.3632	0.907793
	PACC	Cross-Sectional	rs35982920	18	34516411	DTNA	a	g	352	-0.665	+-	0.5059	0.960314
	PACC	Cross-Sectional	rs2509597	18	34528430	DTNA	a	t	352	-1.161	+-	0.2458	0.907793
	PACC	Cross-Sectional	rs71363449	18	34531997	DTNA	t	c	352	1.01	-+	0.3126	0.907793
	PACC	Cross-Sectional	rs2439853	18	34533937	DTNA	a	g	352	0.492	-+	0.6225	0.979398
	PACC	Cross-Sectional	rs2439000	18	34536414	DTNA	c	g	352	0.306	-+	0.7598	0.979398
	PACC	Cross-Sectional	rs11875892	18	34544032	DTNA	a	g	352	0.347	+-	0.7284	0.979398
	PACC	Cross-Sectional	rs1967583	18	34544573	DTNA	t	c	352	0.3	+-	0.7644	0.979398
	PACC	Cross-Sectional	rs28856895	18	34555507	DTNA	a	g	352	1.056	++	0.2909	0.907793
	PACC	Cross-Sectional	rs77973497	18	34560529	DTNA	a	c	352	0.714	++	0.475	0.960314
	PACC	Cross-Sectional	rs2579796	18	34569243	DTNA	a	g	352	0.572	-+	0.5672	0.979398
	PACC	Cross-Sectional	rs2579797	18	34571732	DTNA	t	g	352	-0.186	+-	0.8524	0.979398
	PACC	Cross-Sectional	rs2685557	18	34576782	DTNA	t	c	352	0.493	-+	0.6218	0.979398
	PACC	Cross-Sectional	rs9958492	18	34577783	DTNA	t	c	352	1.024	-+	0.3056	0.907793
	PACC	Cross-Sectional	rs2579802	18	34579787	DTNA	a	c	352	-0.852	--	0.3944	0.907793
	PACC	Cross-Sectional	rs74920018	18	34607557	DTNA	a	t	352	1.02	++	0.3078	0.907793
	PACC	Cross-Sectional	rs1439127	18	34607759	DTNA	a	t	352	-0.539	-+	0.5901	0.979398
	PACC	Cross-Sectional	rs12327368	18	34611361	DTNA	a	g	352	1.151	-+	0.2496	0.907793
	PACC	Cross-Sectional	rs62097188	18	34611412	DTNA	a	g	352	2.023	++	0.04311	0.726416
	PACC	Cross-Sectional	rs9807153	18	34635520	DTNA	a	t	352	0.119	-+	0.9052	0.979398
	PACC	Cross-Sectional	rs2730126	18	34635939	DTNA	a	c	352	-0.051	-+	0.9591	0.979398
	PACC	Cross-Sectional	rs1659526	18	34644451	DTNA	a	g	352	-0.639	+-	0.5228	0.967886
	PACC	Cross-Sectional	rs17642885	18	34649976	DTNA	t	c	352	-0.175	+-	0.8608	0.979398
	PACC	Cross-Sectional	rs1240974	18	34650949	DTNA	t	c	352	-1.064	+-	0.2875	0.907793
	PACC	Cross-Sectional	rs55869511	18	34651262	DTNA	a	c	352	-1.704	--	0.08829	0.806382
	PACC	Cross-Sectional	rs12955208	18	34656737	DTNA	a	g	352	0.497	++	0.6193	0.979398
	PACC	Cross-Sectional	rs72953203	18	34660068	DTNA	a	g	352	0.429	++	0.6681	0.979398
	PACC	Cross-Sectional	rs9946070	18	34665505	DTNA	a	g	352	0.973	++	0.3306	0.907793
	PACC	Cross-Sectional	rs72953211	18	34673381	DTNA	a	c	352	0.142	-+	0.8868	0.979398
	PACC	Cross-Sectional	rs55971592	18	34697328	DTNA	a	g	352	-0.709	--	0.4785	0.960314
	PACC	Cross-Sectional	rs78837792	18	34703359	DTNA	t	c	352	-0.663	--	0.507	0.960314
	PACC	Cross-Sectional	rs11663468	18	34707936	DTNA	t	c	352	-0.723	+-	0.4699	0.960314
	PACC	Cross-Sectional	rs12963825	18	34709484	DTNA	a	g	352	1.99	++	0.04663	0.726416
	PACC	Cross-Sectional	rs1480432	18	34727166	DTNA	t	g	352	0.502	++	0.6159	0.979398
	PACC	Cross-Sectional	rs45556134	18	34729425	DTNA	a	g	352	2.045	++	0.0409	0.726416
	PACC	Cross-Sectional	rs899828	18	34732688	DTNA	t	g	352	1.127	++	0.2599	0.907793
	PACC	Cross-Sectional	rs17556884	18	34736455	DTNA	t	c	352	-1.876	--	0.06068	0.726416
	PACC	Cross-Sectional	rs1480428	18	34738732	DTNA	a	g	352	-0.67	--	0.5029	0.960314
	PACC	Cross-Sectional	rs12957349	18	34739291	DTNA	t	c	352	-0.078	+-	0.9374	0.979398
	PACC	Cross-Sectional	rs12608110	18	34752198	DTNA	a	g	352	1.715	++	0.08631	0.806382
	PACC	Cross-Sectional	rs7228547	18	34760039	DTNA	a	g	352	0.717	-+	0.4736	0.960314
	PACC	Cross-Sectional	rs8099437	18	34761448	DTNA	t	g	352	-0.656	--	0.5117	0.960314
	PACC	Cross-Sectional	rs72955132	18	34762382	DTNA	a	g	352	-1.824	--	0.06821	0.726416
	PACC	Cross-Sectional	rs1817452	18	34776629	DTNA	t	c	352	-0.129	+-	0.8971	0.979398
	PACC	Cross-Sectional	rs56404226	18	34778060	DTNA	a	g	352	-1.48	--	0.1389	0.907793
	PACC	Cross-Sectional	rs72955175	18	34779045	DTNA	a	t	352	-0.112	-+	0.9109	0.979398
	PACC	Cross-Sectional	rs12608251	18	34782906	DTNA	t	g	352	0.099	+-	0.9211	0.979398
	PACC	Cross-Sectional	rs76880720	18	34791141	DTNA	a	c	352	0.069	-+	0.945	0.979398
	PACC	Cross-Sectional	rs9989533	18	34793909	DTNA	t	c	352	1.614	++	0.1065	0.907793
	PACC	Cross-Sectional	rs79500711	18	34794379	DTNA	a	g	352	0.72	++	0.4714	0.960314
	PACC	Cross-Sectional	rs138856611	18	34801684	DTNA	t	g	352	1.01	++	0.3124	0.907793
	PACC	Cross-Sectional	rs62097226	18	34804223	DTNA	a	t	352	-0.757	--	0.4493	0.960314
	PACC	Cross-Sectional	rs4458079	18	34806161	DTNA	t	c	352	-1.876	--	0.06061	0.726416
	PACC	Cross-Sectional	rs8086358	18	34813672	DTNA	t	g	352	-0.413	+-	0.6793	0.979398
	PACC	Cross-Sectional	rs72963047	18	34818804	DTNA	a	c	352	-1.257	--	0.2086	0.907793
	PACC	Cross-Sectional	rs17557660	18	34831178	DTNA	a	t	352	1.488	++	0.1367	0.907793
	PACC	Cross-Sectional	rs1790533	18	34831631	DTNA	a	g	352	-0.146	+-	0.8837	0.979398
	PACC	Cross-Sectional	rs4799782	18	34841123	DTNA	a	g	352	-1.374	--	0.1693	0.907793
	PACC	Cross-Sectional	rs1786604	18	34846264	DTNA	a	g	352	-0.179	-+	0.8581	0.979398
	PACC	Cross-Sectional	rs7233779	18	34863262	DTNA	a	g	352	-1.168	--	0.2429	0.907793
	PACC	Cross-Sectional	rs644982	18	34869793	DTNA	a	g	352	-0.113	+-	0.9102	0.979398
	PACC	Cross-Sectional	rs11659517	18	34870978	DTNA	a	t	352	-0.275	+-	0.7833	0.979398
	PACC	Cross-Sectional	rs524969	18	34872102	DTNA	a	t	352	0.207	-+	0.8357	0.979398
	PACC	Cross-Sectional	rs637914	18	34876135	DTNA	a	t	352	0.885	-+	0.3761	0.907793
	PACC	Cross-Sectional	rs9304141	18	34879143	DTNA	t	c	352	-0.212	-+	0.8318	0.979398
	PACC	Cross-Sectional	rs2288085	18	34879740	DTNA	a	g	352	0.686	++	0.4928	0.960314
	PACC	Cross-Sectional	rs17558116	18	34882719	DTNA	t	c	352	-2.949	--	0.003191	0.437167
	PACC	Cross-Sectional	rs10502637	18	34890006	DTNA	t	c	352	0.959	++	0.3374	0.907793
	PACC	Cross-Sectional	rs149163416	18	34898841	DTNA	a	g	352	-0.865	+-	0.3869	0.907793
	PACC	Cross-Sectional	20:33413780	20	33413780	SNTA1	a	t	352	-0.088	+-	0.9296	0.979398
	PACC	Cross-Sectional	rs291683	20	33431611	SNTA1	t	c	352	-0.905	-+	0.3654	0.907793
	PACC	Cross-Sectional	20:33433270	20	33433270	SNTA1	t	c	352	1.046	+-	0.2953	0.907793
	PACC	Cross-Sectional	rs6141396	20	33436147	SNTA1	a	c	106	1.468	+?	0.1422	0.907793
	PACC	Cross-Sectional	rs293721	20	33441633	SNTA1	t	c	352	-0.399	-+	0.6895	0.979398
	PACC	Longitudinal	rs111599092	3	49465346	DAG1	a	g	265	-1.418	--	0.1562	0.784364
	PACC	Longitudinal	rs73073015	3	49465733	DAG1	a	g	265	0.814	-+	0.4155	0.784364
	PACC	Longitudinal	rs7611164	3	49471395	DAG1	t	g	265	0.224	++	0.8227	0.89474
	PACC	Longitudinal	rs1568661	3	49483525	DAG1	a	g	265	0.259	+-	0.796	0.89474
	PACC	Longitudinal	rs7374731	3	49495661	DAG1	c	g	265	1.728	++	0.08408	0.784364
	PACC	Longitudinal	rs73074811	3	49516098	DAG1	a	t	265	-1.151	--	0.2498	0.784364
	PACC	Longitudinal	rs3870338	3	49519618	DAG1	a	g	265	0.259	+-	0.796	0.89474
	PACC	Longitudinal	rs55935606	3	49528072	DAG1	a	g	265	-0.924	--	0.3557	0.784364
	PACC	Longitudinal	rs75153130	3	49530436	DAG1	a	c	265	-0.224	--	0.8227	0.89474
	PACC	Longitudinal	rs13079082	3	49537375	DAG1	c	g	265	1.464	++	0.1431	0.784364
	PACC	Longitudinal	rs4052546	3	49538116	DAG1	c	g	265	-1.728	--	0.08408	0.784364
	PACC	Longitudinal	rs73074830	3	49539584	DAG1	a	c	265	2.126	++	0.03349	0.784364
	PACC	Longitudinal	rs114093899	3	49539955	DAG1	c	g	265	0.943	++	0.3456	0.784364
	PACC	Longitudinal	rs9789109	18	26842291	AQP4	a	g	265	1.629	-+	0.1033	0.784364
	PACC	Longitudinal	rs10164026	18	26842362	AQP4	a	c	265	0.416	-+	0.6777	0.859675
	PACC	Longitudinal	rs4800270	18	26844933	AQP4	t	g	265	1.62	-+	0.1051	0.784364
	PACC	Longitudinal	rs79668602	18	26845488	AQP4	a	g	265	0.112	-+	0.9107	0.945196
	PACC	Longitudinal	rs12458416	18	26847267	AQP4	c	g	265	0.641	-+	0.5217	0.799928
	PACC	Longitudinal	rs12953446	18	26848521	AQP4	a	g	265	1.485	-+	0.1377	0.784364
	PACC	Longitudinal	rs67461489	18	26848876	AQP4	t	c	265	-1.182	+-	0.2371	0.784364
	PACC	Longitudinal	rs11661081	18	26850068	AQP4	a	c	265	-1.224	--	0.221	0.784364
	PACC	Longitudinal	rs3763043	18	26855854	AQP4	t	c	265	-0.603	+-	0.5463	0.811069
	PACC	Longitudinal	rs68006382	18	26856555	AQP4	a	g	265	0.478	-+	0.6327	0.840047
	PACC	Longitudinal	rs335930	18	26856961	AQP4	a	c	265	-1.163	+-	0.2448	0.784364
	PACC	Longitudinal	rs71353405	18	26857429	AQP4	t	c	265	0.75	-+	0.453	0.784364
	PACC	Longitudinal	rs162009	18	26864250	AQP4	a	g	265	2.032	-+	0.04215	0.784364
	PACC	Longitudinal	rs4800773	18	26865017	AQP4	a	g	265	0.71	++	0.4777	0.784364
	PACC	Longitudinal	rs3875089	18	26865469	AQP4	t	c	265	-1.78	+-	0.07502	0.784364
	PACC	Longitudinal	rs72878787	18	26866517	AQP4	a	g	265	1.765	++	0.07753	0.784364
	PACC	Longitudinal	rs162006	18	26866570	AQP4	t	c	265	1.692	-+	0.09063	0.784364
	PACC	Longitudinal	rs151244	18	26866755	AQP4	t	c	265	-1.468	+-	0.1422	0.784364
	PACC	Longitudinal	rs72878794	18	26866839	AQP4	t	c	265	1.298	++	0.1943	0.784364
	PACC	Longitudinal	rs9961118	18	26866901	AQP4	t	c	265	-1.423	--	0.1547	0.784364
	PACC	Longitudinal	rs162004	18	26867972	AQP4	c	g	265	-0.247	-+	0.805	0.89474
	PACC	Longitudinal	rs72878799	18	26868165	AQP4	a	g	265	-0.765	--	0.444	0.784364
	PACC	Longitudinal	rs11662318	18	26869056	AQP4	t	c	265	0.42	-+	0.6748	0.859675
	PACC	Longitudinal	rs151246	18	26869139	AQP4	t	g	265	-0.895	+-	0.3705	0.784364
	PACC	Longitudinal	rs491148	18	26869803	AQP4	a	g	265	-1.08	+-	0.2803	0.784364
	PACC	Longitudinal	rs162002	18	26871015	AQP4	a	g	265	-1.795	+-	0.07261	0.784364
	PACC	Longitudinal	rs162001	18	26871481	AQP4	a	c	265	1.39	-+	0.1646	0.784364
	PACC	Longitudinal	rs3865411	18	26871684	AQP4	a	g	265	-2.279	--	0.02268	0.784364
	PACC	Longitudinal	rs162000	18	26872471	AQP4	a	c	265	-1.039	+-	0.2988	0.784364
	PACC	Longitudinal	rs12969503	18	26873564	AQP4	t	g	265	-0.559	--	0.5763	0.821021
	PACC	Longitudinal	rs8094228	18	26873767	AQP4	t	c	265	0.42	++	0.6748	0.859675
	PACC	Longitudinal	rs480647	18	26874290	AQP4	t	c	265	-0.878	--	0.3799	0.784364
	PACC	Longitudinal	rs10502478	18	26874616	AQP4	a	c	265	1.35	-+	0.1771	0.784364
	PACC	Longitudinal	rs7234562	18	34483685	DTNA	t	c	265	-0.717	--	0.4736	0.784364
	PACC	Longitudinal	rs79922046	18	34485536	DTNA	a	g	265	0.256	+-	0.7983	0.89474
	PACC	Longitudinal	rs9955950	18	34485672	DTNA	t	c	265	1.57	-+	0.1163	0.784364
	PACC	Longitudinal	rs12957028	18	34485948	DTNA	a	g	265	-0.269	-+	0.7876	0.89474
	PACC	Longitudinal	rs72639491	18	34491438	DTNA	a	g	265	-0.588	-+	0.5565	0.811069
	PACC	Longitudinal	rs62097347	18	34492032	DTNA	c	g	265	-0.544	+-	0.5865	0.821021
	PACC	Longitudinal	rs9961251	18	34492344	DTNA	t	c	265	-2.02	--	0.04339	0.784364
	PACC	Longitudinal	rs111846993	18	34494001	DTNA	t	c	265	-0.358	--	0.7202	0.878723
	PACC	Longitudinal	rs4799769	18	34494577	DTNA	c	g	265	1.442	++	0.1492	0.784364
	PACC	Longitudinal	rs8092794	18	34496273	DTNA	a	g	265	-0.224	-+	0.8229	0.89474
	PACC	Longitudinal	rs7243528	18	34497055	DTNA	t	c	265	-0.255	--	0.7988	0.89474
	PACC	Longitudinal	rs79972565	18	34497194	DTNA	t	g	265	-0.313	--	0.7544	0.890972
	PACC	Longitudinal	rs35839923	18	34497764	DTNA	a	g	265	0.516	++	0.606	0.83022
	PACC	Longitudinal	rs62097349	18	34499519	DTNA	a	g	265	1.515	++	0.1298	0.784364
	PACC	Longitudinal	rs9965622	18	34502153	DTNA	t	c	265	-0.769	--	0.4418	0.784364
	PACC	Longitudinal	rs62098462	18	34504364	DTNA	t	c	265	1.24	++	0.2149	0.784364
	PACC	Longitudinal	rs75127284	18	34506592	DTNA	a	c	265	0.635	-+	0.5255	0.799928
	PACC	Longitudinal	rs2439861	18	34507940	DTNA	a	g	265	0.075	+-	0.9406	0.954535
	PACC	Longitudinal	rs35982920	18	34516411	DTNA	a	g	265	-1.375	--	0.1693	0.784364
	PACC	Longitudinal	rs2509597	18	34528430	DTNA	a	t	265	-1.02	+-	0.3076	0.784364
	PACC	Longitudinal	rs71363449	18	34531997	DTNA	t	c	265	-1.023	--	0.3064	0.784364
	PACC	Longitudinal	rs2439853	18	34533937	DTNA	a	g	265	-1.34	--	0.1804	0.784364
	PACC	Longitudinal	rs2439000	18	34536414	DTNA	c	g	265	0.608	+-	0.5432	0.811069
	PACC	Longitudinal	rs11875892	18	34544032	DTNA	a	g	265	-1.54	--	0.1235	0.784364
	PACC	Longitudinal	rs1967583	18	34544573	DTNA	t	c	265	1.143	++	0.253	0.784364
	PACC	Longitudinal	rs28856895	18	34555507	DTNA	a	g	265	-0.368	--	0.7128	0.878723
	PACC	Longitudinal	rs77973497	18	34560529	DTNA	a	c	265	1.143	-+	0.253	0.784364
	PACC	Longitudinal	rs2579796	18	34569243	DTNA	a	g	265	-1.508	--	0.1315	0.784364
	PACC	Longitudinal	rs2579797	18	34571732	DTNA	t	g	265	-0.744	--	0.4571	0.784364
	PACC	Longitudinal	rs2685557	18	34576782	DTNA	t	c	265	-1.401	--	0.1611	0.784364
	PACC	Longitudinal	rs9958492	18	34577783	DTNA	t	c	265	-1.169	--	0.2426	0.784364
	PACC	Longitudinal	rs2579802	18	34579787	DTNA	a	c	265	-0.694	--	0.4878	0.784364
	PACC	Longitudinal	rs74920018	18	34607557	DTNA	a	t	265	0.898	-+	0.3691	0.784364
	PACC	Longitudinal	rs1439127	18	34607759	DTNA	a	t	265	0.788	++	0.4309	0.784364
	PACC	Longitudinal	rs12327368	18	34611361	DTNA	a	g	265	-1.32	--	0.187	0.784364
	PACC	Longitudinal	rs62097188	18	34611412	DTNA	a	g	265	0.78	++	0.4353	0.784364
	PACC	Longitudinal	rs9807153	18	34635520	DTNA	a	t	265	-0.543	+-	0.5873	0.821021
	PACC	Longitudinal	rs2730126	18	34635939	DTNA	a	c	265	-1.343	--	0.1792	0.784364
	PACC	Longitudinal	rs1659526	18	34644451	DTNA	a	g	265	-0.701	--	0.4835	0.784364
	PACC	Longitudinal	rs17642885	18	34649976	DTNA	t	c	265	-0.96	--	0.337	0.784364
	PACC	Longitudinal	rs1240974	18	34650949	DTNA	t	c	265	-0.684	--	0.4938	0.784364
	PACC	Longitudinal	rs55869511	18	34651262	DTNA	a	c	265	0.656	++	0.5117	0.796624
	PACC	Longitudinal	rs12955208	18	34656737	DTNA	a	g	265	0.395	++	0.6927	0.870641
	PACC	Longitudinal	rs72953203	18	34660068	DTNA	a	g	265	-0.419	+-	0.6754	0.859675
	PACC	Longitudinal	rs9946070	18	34665505	DTNA	a	g	265	0.075	-+	0.9404	0.954535
	PACC	Longitudinal	rs72953211	18	34673381	DTNA	a	c	265	-0.192	-+	0.8476	0.907197
	PACC	Longitudinal	rs55971592	18	34697328	DTNA	a	g	265	0.715	++	0.4744	0.784364
	PACC	Longitudinal	rs78837792	18	34703359	DTNA	t	c	265	0.478	++	0.6329	0.840047
	PACC	Longitudinal	rs11663468	18	34707936	DTNA	t	c	265	-0.183	-+	0.8544	0.907386
	PACC	Longitudinal	rs12963825	18	34709484	DTNA	a	g	265	-0.728	-+	0.4666	0.784364
	PACC	Longitudinal	rs1480432	18	34727166	DTNA	t	g	265	-0.006	-+	0.9952	0.9952
	PACC	Longitudinal	rs45556134	18	34729425	DTNA	a	g	265	-0.275	+-	0.7836	0.89474
	PACC	Longitudinal	rs899828	18	34732688	DTNA	t	g	265	-0.345	+-	0.7302	0.878723
	PACC	Longitudinal	rs17556884	18	34736455	DTNA	t	c	265	0.786	+-	0.4316	0.784364
	PACC	Longitudinal	rs1480428	18	34738732	DTNA	a	g	265	0.799	+-	0.4246	0.784364
	PACC	Longitudinal	rs12957349	18	34739291	DTNA	t	c	265	0.853	++	0.3938	0.784364
	PACC	Longitudinal	rs12608110	18	34752198	DTNA	a	g	265	-0.334	+-	0.7387	0.880017
	PACC	Longitudinal	rs7228547	18	34760039	DTNA	a	g	265	0.054	+-	0.9573	0.964339
	PACC	Longitudinal	rs8099437	18	34761448	DTNA	t	g	265	0.677	+-	0.4981	0.784364
	PACC	Longitudinal	rs72955132	18	34762382	DTNA	a	g	265	0.786	+-	0.4316	0.784364
	PACC	Longitudinal	rs1817452	18	34776629	DTNA	t	c	265	1.192	++	0.2332	0.784364
	PACC	Longitudinal	rs56404226	18	34778060	DTNA	a	g	265	1.156	-+	0.2476	0.784364
	PACC	Longitudinal	rs72955175	18	34779045	DTNA	a	t	265	-0.114	+-	0.9094	0.945196
	PACC	Longitudinal	rs12608251	18	34782906	DTNA	t	g	265	0.803	-+	0.4222	0.784364
	PACC	Longitudinal	rs76880720	18	34791141	DTNA	a	c	265	-1.043	--	0.2968	0.784364
	PACC	Longitudinal	rs9989533	18	34793909	DTNA	t	c	265	-0.686	+-	0.4924	0.784364
	PACC	Longitudinal	rs79500711	18	34794379	DTNA	a	g	265	-0.471	-+	0.6377	0.840047
	PACC	Longitudinal	rs138856611	18	34801684	DTNA	t	g	265	0.084	+-	0.9334	0.954535
	PACC	Longitudinal	rs62097226	18	34804223	DTNA	a	t	265	0.771	-+	0.4409	0.784364
	PACC	Longitudinal	rs4458079	18	34806161	DTNA	t	c	265	0.73	++	0.4653	0.784364
	PACC	Longitudinal	rs8086358	18	34813672	DTNA	t	g	265	0.344	-+	0.7312	0.878723
	PACC	Longitudinal	rs72963047	18	34818804	DTNA	a	c	265	0.589	++	0.5561	0.811069
	PACC	Longitudinal	rs17557660	18	34831178	DTNA	a	t	265	-0.485	+-	0.6275	0.840047
	PACC	Longitudinal	rs1790533	18	34831631	DTNA	a	g	265	1.222	-+	0.2218	0.784364
	PACC	Longitudinal	rs4799782	18	34841123	DTNA	a	g	265	-0.529	-+	0.5969	0.826013
	PACC	Longitudinal	rs1786604	18	34846264	DTNA	a	g	265	-0.202	+-	0.84	0.906142
	PACC	Longitudinal	rs7233779	18	34863262	DTNA	a	g	265	-0.113	+-	0.9098	0.945196
	PACC	Longitudinal	rs644982	18	34869793	DTNA	a	g	265	0.378	-+	0.7053	0.878419
	PACC	Longitudinal	rs11659517	18	34870978	DTNA	a	t	265	1.042	++	0.2976	0.784364
	PACC	Longitudinal	rs524969	18	34872102	DTNA	a	t	265	-1.016	+-	0.3098	0.784364
	PACC	Longitudinal	rs637914	18	34876135	DTNA	a	t	265	-1.101	+-	0.271	0.784364
	PACC	Longitudinal	rs9304141	18	34879143	DTNA	t	c	265	2.559	-+	0.0105	0.784364
	PACC	Longitudinal	rs2288085	18	34879740	DTNA	a	g	265	0.971	-+	0.3314	0.784364
	PACC	Longitudinal	rs17558116	18	34882719	DTNA	t	c	265	1.235	++	0.2168	0.784364
	PACC	Longitudinal	rs10502637	18	34890006	DTNA	t	c	265	-0.824	-+	0.4099	0.784364
	PACC	Longitudinal	rs149163416	18	34898841	DTNA	a	g	265	-2.194	+-	0.02825	0.784364
	PACC	Longitudinal	20:33413780	20	33413780	SNTA1	a	t	265	-0.833	--	0.4046	0.784364
	PACC	Longitudinal	rs291683	20	33431611	SNTA1	t	c	265	-0.55	-+	0.5825	0.821021
	PACC	Longitudinal	20:33433270	20	33433270	SNTA1	t	c	265	-0.882	+-	0.3775	0.784364
	PACC	Longitudinal	rs6141396	20	33436147	SNTA1	a	c	71	1.045	+?	0.2961	0.784364
	PACC	Longitudinal	rs293721	20	33441633	SNTA1	t	c	265	0.78	++	0.4356	0.784364
	Ventricular_Volume	Cross-Sectional	rs111599092	3	49465346	DAG1	a	g	338	0.245	++	0.8064	0.967101
	Ventricular_Volume	Cross-Sectional	rs73073015	3	49465733	DAG1	a	g	338	-0.29	+-	0.7716	0.952335
	Ventricular_Volume	Cross-Sectional	rs7611164	3	49471395	DAG1	t	g	338	-1.196	--	0.2316	0.79323
	Ventricular_Volume	Cross-Sectional	rs1568661	3	49483525	DAG1	a	g	338	-0.404	--	0.6863	0.902391
	Ventricular_Volume	Cross-Sectional	rs7374731	3	49495661	DAG1	c	g	338	-1.876	--	0.06059	0.733293
	Ventricular_Volume	Cross-Sectional	rs73074811	3	49516098	DAG1	a	t	338	1.719	++	0.08564	0.733293
	Ventricular_Volume	Cross-Sectional	rs3870338	3	49519618	DAG1	a	g	338	-0.404	--	0.6863	0.902391
	Ventricular_Volume	Cross-Sectional	rs55935606	3	49528072	DAG1	a	g	338	1.806	++	0.07092	0.733293
	Ventricular_Volume	Cross-Sectional	rs75153130	3	49530436	DAG1	a	c	338	1.196	++	0.2316	0.79323
	Ventricular_Volume	Cross-Sectional	rs13079082	3	49537375	DAG1	c	g	338	-1.247	--	0.2124	0.79323
	Ventricular_Volume	Cross-Sectional	rs4052546	3	49538116	DAG1	c	g	338	1.876	++	0.06059	0.733293
	Ventricular_Volume	Cross-Sectional	rs73074830	3	49539584	DAG1	a	c	338	-1.055	--	0.2914	0.849937
	Ventricular_Volume	Cross-Sectional	rs114093899	3	49539955	DAG1	c	g	338	0.399	++	0.69	0.902391
	Ventricular_Volume	Cross-Sectional	rs9789109	18	26842291	AQP4	a	g	338	0.094	++	0.9253	0.9927
	Ventricular_Volume	Cross-Sectional	rs10164026	18	26842362	AQP4	a	c	338	-2.388	--	0.01695	0.653764
	Ventricular_Volume	Cross-Sectional	rs4800270	18	26844933	AQP4	t	g	338	1.31	++	0.1902	0.79323
	Ventricular_Volume	Cross-Sectional	rs79668602	18	26845488	AQP4	a	g	338	-0.394	--	0.6937	0.902391
	Ventricular_Volume	Cross-Sectional	rs12458416	18	26847267	AQP4	c	g	338	-2.487	--	0.0129	0.653764
	Ventricular_Volume	Cross-Sectional	rs12953446	18	26848521	AQP4	a	g	338	0.411	++	0.681	0.902391
	Ventricular_Volume	Cross-Sectional	rs67461489	18	26848876	AQP4	t	c	338	1.499	++	0.1337	0.79323
	Ventricular_Volume	Cross-Sectional	rs11661081	18	26850068	AQP4	a	c	338	0.691	+-	0.4894	0.902391
	Ventricular_Volume	Cross-Sectional	rs3763043	18	26855854	AQP4	t	c	338	2.472	++	0.01344	0.653764
	Ventricular_Volume	Cross-Sectional	rs68006382	18	26856555	AQP4	a	g	338	-0.833	--	0.4048	0.858252
	Ventricular_Volume	Cross-Sectional	rs335930	18	26856961	AQP4	a	c	338	-0.194	-+	0.8464	0.979436
	Ventricular_Volume	Cross-Sectional	rs71353405	18	26857429	AQP4	t	c	338	-0.413	-+	0.6799	0.902391
	Ventricular_Volume	Cross-Sectional	rs162009	18	26864250	AQP4	a	g	338	-1.022	--	0.3068	0.849937
	Ventricular_Volume	Cross-Sectional	rs4800773	18	26865017	AQP4	a	g	338	-0.851	--	0.3947	0.858252
	Ventricular_Volume	Cross-Sectional	rs3875089	18	26865469	AQP4	t	c	338	0.599	+-	0.549	0.902391
	Ventricular_Volume	Cross-Sectional	rs72878787	18	26866517	AQP4	a	g	338	-1.405	--	0.16	0.79323
	Ventricular_Volume	Cross-Sectional	rs162006	18	26866570	AQP4	t	c	338	0.133	+-	0.8945	0.9927
	Ventricular_Volume	Cross-Sectional	rs151244	18	26866755	AQP4	t	c	338	0.762	-+	0.4463	0.902391
	Ventricular_Volume	Cross-Sectional	rs72878794	18	26866839	AQP4	t	c	338	-0.303	-+	0.7616	0.948538
	Ventricular_Volume	Cross-Sectional	rs9961118	18	26866901	AQP4	t	c	338	-1.024	+-	0.3057	0.849937
	Ventricular_Volume	Cross-Sectional	rs162004	18	26867972	AQP4	c	g	338	-0.069	-+	0.9448	0.9927
	Ventricular_Volume	Cross-Sectional	rs72878799	18	26868165	AQP4	a	g	338	0.669	++	0.5038	0.902391
	Ventricular_Volume	Cross-Sectional	rs11662318	18	26869056	AQP4	t	c	338	0.218	++	0.8274	0.968836
	Ventricular_Volume	Cross-Sectional	rs151246	18	26869139	AQP4	t	g	338	-0.43	-+	0.6671	0.902391
	Ventricular_Volume	Cross-Sectional	rs491148	18	26869803	AQP4	a	g	338	-0.835	+-	0.4035	0.858252
	Ventricular_Volume	Cross-Sectional	rs162002	18	26871015	AQP4	a	g	338	-0.692	--	0.4889	0.902391
	Ventricular_Volume	Cross-Sectional	rs162001	18	26871481	AQP4	a	c	338	-0.03	+-	0.9761	0.9927
	Ventricular_Volume	Cross-Sectional	rs3865411	18	26871684	AQP4	a	g	338	0.441	+-	0.6595	0.902391
	Ventricular_Volume	Cross-Sectional	rs162000	18	26872471	AQP4	a	c	338	-0.165	+-	0.8691	0.984022
	Ventricular_Volume	Cross-Sectional	rs12969503	18	26873564	AQP4	t	g	338	-0.397	--	0.691	0.902391
	Ventricular_Volume	Cross-Sectional	rs8094228	18	26873767	AQP4	t	c	338	0.567	++	0.5706	0.902391
	Ventricular_Volume	Cross-Sectional	rs480647	18	26874290	AQP4	t	c	338	-0.898	--	0.3692	0.858252
	Ventricular_Volume	Cross-Sectional	rs10502478	18	26874616	AQP4	a	c	338	0.455	+-	0.6495	0.902391
	Ventricular_Volume	Cross-Sectional	rs7234562	18	34483685	DTNA	t	c	338	0.019	-+	0.9845	0.9927
	Ventricular_Volume	Cross-Sectional	rs79922046	18	34485536	DTNA	a	g	338	-0.332	+-	0.7396	0.929589
	Ventricular_Volume	Cross-Sectional	rs9955950	18	34485672	DTNA	t	c	338	1.008	++	0.3134	0.849937
	Ventricular_Volume	Cross-Sectional	rs12957028	18	34485948	DTNA	a	g	338	0.117	+-	0.9072	0.9927
	Ventricular_Volume	Cross-Sectional	rs72639491	18	34491438	DTNA	a	g	338	-0.238	+-	0.8118	0.967101
	Ventricular_Volume	Cross-Sectional	rs62097347	18	34492032	DTNA	c	g	338	-0.375	--	0.708	0.906505
	Ventricular_Volume	Cross-Sectional	rs9961251	18	34492344	DTNA	t	c	338	-1.289	--	0.1973	0.79323
	Ventricular_Volume	Cross-Sectional	rs111846993	18	34494001	DTNA	t	c	338	-0.965	--	0.3343	0.858252
	Ventricular_Volume	Cross-Sectional	rs4799769	18	34494577	DTNA	c	g	338	-1.018	--	0.3085	0.849937
	Ventricular_Volume	Cross-Sectional	rs8092794	18	34496273	DTNA	a	g	338	0.525	++	0.5997	0.902391
	Ventricular_Volume	Cross-Sectional	rs7243528	18	34497055	DTNA	t	c	338	0.719	-+	0.472	0.902391
	Ventricular_Volume	Cross-Sectional	rs79972565	18	34497194	DTNA	t	g	338	0.114	++	0.9093	0.9927
	Ventricular_Volume	Cross-Sectional	rs35839923	18	34497764	DTNA	a	g	338	0.055	-+	0.9562	0.9927
	Ventricular_Volume	Cross-Sectional	rs62097349	18	34499519	DTNA	a	g	338	-0.615	+-	0.5387	0.902391
	Ventricular_Volume	Cross-Sectional	rs9965622	18	34502153	DTNA	t	c	338	1.805	++	0.07106	0.733293
	Ventricular_Volume	Cross-Sectional	rs62098462	18	34504364	DTNA	t	c	338	-0.602	+-	0.5473	0.902391
	Ventricular_Volume	Cross-Sectional	rs75127284	18	34506592	DTNA	a	c	338	-0.223	+-	0.8232	0.968836
	Ventricular_Volume	Cross-Sectional	rs2439861	18	34507940	DTNA	a	g	338	0.642	-+	0.5212	0.902391
	Ventricular_Volume	Cross-Sectional	rs35982920	18	34516411	DTNA	a	g	338	-0.045	+-	0.964	0.9927
	Ventricular_Volume	Cross-Sectional	rs2509597	18	34528430	DTNA	a	t	338	1.086	-+	0.2774	0.849937
	Ventricular_Volume	Cross-Sectional	rs71363449	18	34531997	DTNA	t	c	338	0.68	++	0.4963	0.902391
	Ventricular_Volume	Cross-Sectional	rs2439853	18	34533937	DTNA	a	g	338	-0.24	+-	0.8105	0.967101
	Ventricular_Volume	Cross-Sectional	rs2439000	18	34536414	DTNA	c	g	338	1.098	++	0.2722	0.849937
	Ventricular_Volume	Cross-Sectional	rs11875892	18	34544032	DTNA	a	g	338	0.186	+-	0.8523	0.979436
	Ventricular_Volume	Cross-Sectional	rs1967583	18	34544573	DTNA	t	c	338	-1.663	--	0.09639	0.77679
	Ventricular_Volume	Cross-Sectional	rs28856895	18	34555507	DTNA	a	g	338	-0.408	--	0.6834	0.902391
	Ventricular_Volume	Cross-Sectional	rs77973497	18	34560529	DTNA	a	c	338	-0.54	+-	0.5894	0.902391
	Ventricular_Volume	Cross-Sectional	rs2579796	18	34569243	DTNA	a	g	338	-0.388	--	0.6982	0.902391
	Ventricular_Volume	Cross-Sectional	rs2579797	18	34571732	DTNA	t	g	338	-0.93	--	0.3522	0.858252
	Ventricular_Volume	Cross-Sectional	rs2685557	18	34576782	DTNA	t	c	338	-0.411	--	0.6809	0.902391
	Ventricular_Volume	Cross-Sectional	rs9958492	18	34577783	DTNA	t	c	338	0.482	++	0.63	0.902391
	Ventricular_Volume	Cross-Sectional	rs2579802	18	34579787	DTNA	a	c	338	-0.752	--	0.4519	0.902391
	Ventricular_Volume	Cross-Sectional	rs74920018	18	34607557	DTNA	a	t	338	-0.466	+-	0.6409	0.902391
	Ventricular_Volume	Cross-Sectional	rs1439127	18	34607759	DTNA	a	t	338	-0.486	--	0.6268	0.902391
	Ventricular_Volume	Cross-Sectional	rs12327368	18	34611361	DTNA	a	g	338	0.519	++	0.6037	0.902391
	Ventricular_Volume	Cross-Sectional	rs62097188	18	34611412	DTNA	a	g	338	-1.511	--	0.1307	0.79323
	Ventricular_Volume	Cross-Sectional	rs9807153	18	34635520	DTNA	a	t	338	1.292	++	0.1964	0.79323
	Ventricular_Volume	Cross-Sectional	rs2730126	18	34635939	DTNA	a	c	338	-0.091	--	0.9274	0.9927
	Ventricular_Volume	Cross-Sectional	rs1659526	18	34644451	DTNA	a	g	338	-0.54	--	0.5889	0.902391
	Ventricular_Volume	Cross-Sectional	rs17642885	18	34649976	DTNA	t	c	338	0.829	++	0.4072	0.858252
	Ventricular_Volume	Cross-Sectional	rs1240974	18	34650949	DTNA	t	c	338	-0.673	--	0.5008	0.902391
	Ventricular_Volume	Cross-Sectional	rs55869511	18	34651262	DTNA	a	c	338	0.042	-+	0.9665	0.9927
	Ventricular_Volume	Cross-Sectional	rs12955208	18	34656737	DTNA	a	g	338	-1.196	--	0.2315	0.79323
	Ventricular_Volume	Cross-Sectional	rs72953203	18	34660068	DTNA	a	g	338	0.521	++	0.6024	0.902391
	Ventricular_Volume	Cross-Sectional	rs9946070	18	34665505	DTNA	a	g	338	-0.917	+-	0.359	0.858252
	Ventricular_Volume	Cross-Sectional	rs72953211	18	34673381	DTNA	a	c	338	1.398	++	0.1622	0.79323
	Ventricular_Volume	Cross-Sectional	rs55971592	18	34697328	DTNA	a	g	338	1.278	++	0.2013	0.79323
	Ventricular_Volume	Cross-Sectional	rs78837792	18	34703359	DTNA	t	c	338	-0.832	--	0.4056	0.858252
	Ventricular_Volume	Cross-Sectional	rs11663468	18	34707936	DTNA	t	c	338	-2.088	--	0.03684	0.718565
	Ventricular_Volume	Cross-Sectional	rs12963825	18	34709484	DTNA	a	g	338	1.258	++	0.2084	0.79323
	Ventricular_Volume	Cross-Sectional	rs1480432	18	34727166	DTNA	t	g	338	-1.597	--	0.1103	0.79323
	Ventricular_Volume	Cross-Sectional	rs45556134	18	34729425	DTNA	a	g	338	-1.054	+-	0.2921	0.849937
	Ventricular_Volume	Cross-Sectional	rs899828	18	34732688	DTNA	t	g	338	0.032	+-	0.9746	0.9927
	Ventricular_Volume	Cross-Sectional	rs17556884	18	34736455	DTNA	t	c	338	-0.964	--	0.3352	0.858252
	Ventricular_Volume	Cross-Sectional	rs1480428	18	34738732	DTNA	a	g	338	0.878	-+	0.3798	0.858252
	Ventricular_Volume	Cross-Sectional	rs12957349	18	34739291	DTNA	t	c	338	-1.213	--	0.2253	0.79323
	Ventricular_Volume	Cross-Sectional	rs12608110	18	34752198	DTNA	a	g	338	0.352	+-	0.7251	0.919803
	Ventricular_Volume	Cross-Sectional	rs7228547	18	34760039	DTNA	a	g	338	1.763	++	0.07783	0.733293
	Ventricular_Volume	Cross-Sectional	rs8099437	18	34761448	DTNA	t	g	338	0.784	-+	0.4328	0.898388
	Ventricular_Volume	Cross-Sectional	rs72955132	18	34762382	DTNA	a	g	338	-0.912	--	0.3617	0.858252
	Ventricular_Volume	Cross-Sectional	rs1817452	18	34776629	DTNA	t	c	338	-1.346	+-	0.1781	0.79323
	Ventricular_Volume	Cross-Sectional	rs56404226	18	34778060	DTNA	a	g	338	-0.527	-+	0.5984	0.902391
	Ventricular_Volume	Cross-Sectional	rs72955175	18	34779045	DTNA	a	t	338	1.883	++	0.05976	0.733293
	Ventricular_Volume	Cross-Sectional	rs12608251	18	34782906	DTNA	t	g	338	-2.262	--	0.02372	0.653764
	Ventricular_Volume	Cross-Sectional	rs76880720	18	34791141	DTNA	a	c	338	1.29	-+	0.1972	0.79323
	Ventricular_Volume	Cross-Sectional	rs9989533	18	34793909	DTNA	t	c	338	1.076	++	0.2818	0.849937
	Ventricular_Volume	Cross-Sectional	rs79500711	18	34794379	DTNA	a	g	338	1.002	++	0.3164	0.849937
	Ventricular_Volume	Cross-Sectional	rs138856611	18	34801684	DTNA	t	g	338	-1.749	--	0.08032	0.733293
	Ventricular_Volume	Cross-Sectional	rs62097226	18	34804223	DTNA	a	t	338	-0.179	-+	0.8579	0.979436
	Ventricular_Volume	Cross-Sectional	rs4458079	18	34806161	DTNA	t	c	338	-0.07	+-	0.9443	0.9927
	Ventricular_Volume	Cross-Sectional	rs8086358	18	34813672	DTNA	t	g	338	-1.309	+-	0.1906	0.79323
	Ventricular_Volume	Cross-Sectional	rs72963047	18	34818804	DTNA	a	c	338	-0.244	--	0.8073	0.967101
	Ventricular_Volume	Cross-Sectional	rs17557660	18	34831178	DTNA	a	t	338	-0.014	+-	0.9885	0.9927
	Ventricular_Volume	Cross-Sectional	rs1790533	18	34831631	DTNA	a	g	338	-2.259	--	0.02386	0.653764
	Ventricular_Volume	Cross-Sectional	rs4799782	18	34841123	DTNA	a	g	338	2.079	++	0.03761	0.718565
	Ventricular_Volume	Cross-Sectional	rs1786604	18	34846264	DTNA	a	g	338	1.626	++	0.1039	0.790794
	Ventricular_Volume	Cross-Sectional	rs7233779	18	34863262	DTNA	a	g	338	-0.533	+-	0.5938	0.902391
	Ventricular_Volume	Cross-Sectional	rs644982	18	34869793	DTNA	a	g	338	-1.318	--	0.1875	0.79323
	Ventricular_Volume	Cross-Sectional	rs11659517	18	34870978	DTNA	a	t	338	-1.462	--	0.1438	0.79323
	Ventricular_Volume	Cross-Sectional	rs524969	18	34872102	DTNA	a	t	338	2.034	++	0.04196	0.718565
	Ventricular_Volume	Cross-Sectional	rs637914	18	34876135	DTNA	a	t	338	1.241	++	0.2146	0.79323
	Ventricular_Volume	Cross-Sectional	rs9304141	18	34879143	DTNA	t	c	338	-0.148	-+	0.8827	0.991229
	Ventricular_Volume	Cross-Sectional	rs2288085	18	34879740	DTNA	a	g	338	-0.526	-+	0.599	0.902391
	Ventricular_Volume	Cross-Sectional	rs17558116	18	34882719	DTNA	t	c	338	-0.873	--	0.3828	0.858252
	Ventricular_Volume	Cross-Sectional	rs10502637	18	34890006	DTNA	t	c	338	-0.91	--	0.3627	0.858252
	Ventricular_Volume	Cross-Sectional	rs149163416	18	34898841	DTNA	a	g	338	-1.078	+-	0.2812	0.849937
	Ventricular_Volume	Cross-Sectional	20:33413780	20	33413780	SNTA1	a	t	338	-1.476	--	0.1399	0.79323
	Ventricular_Volume	Cross-Sectional	rs291683	20	33431611	SNTA1	t	c	338	0.578	++	0.5635	0.902391
	Ventricular_Volume	Cross-Sectional	20:33433270	20	33433270	SNTA1	t	c	338	-0.676	--	0.4989	0.902391
	Ventricular_Volume	Cross-Sectional	rs6141396	20	33436147	SNTA1	a	c	93	-0.009	-?	0.9927	0.9927
	Ventricular_Volume	Cross-Sectional	rs293721	20	33441633	SNTA1	t	c	338	-0.745	--	0.456	0.902391
	Ventricular_Volume	Longitudinal	rs111599092	3	49465346	DAG1	a	g	111	0.382	++	0.7028	0.96585
	Ventricular_Volume	Longitudinal	rs73073015	3	49465733	DAG1	a	g	111	0.034	-+	0.9727	0.987516
	Ventricular_Volume	Longitudinal	rs7611164	3	49471395	DAG1	t	g	111	0.23	++	0.818	0.96585
	Ventricular_Volume	Longitudinal	rs1568661	3	49483525	DAG1	a	g	111	-1.288	--	0.1976	0.928235
	Ventricular_Volume	Longitudinal	rs7374731	3	49495661	DAG1	c	g	111	-0.93	--	0.3525	0.928235
	Ventricular_Volume	Longitudinal	rs73074811	3	49516098	DAG1	a	t	111	-0.082	+-	0.935	0.987516
	Ventricular_Volume	Longitudinal	rs3870338	3	49519618	DAG1	a	g	111	-1.288	--	0.1976	0.928235
	Ventricular_Volume	Longitudinal	rs55935606	3	49528072	DAG1	a	g	111	0.975	++	0.3297	0.928235
	Ventricular_Volume	Longitudinal	rs75153130	3	49530436	DAG1	a	c	111	-0.23	--	0.818	0.96585
	Ventricular_Volume	Longitudinal	rs13079082	3	49537375	DAG1	c	g	111	1.02	++	0.3077	0.928235
	Ventricular_Volume	Longitudinal	rs4052546	3	49538116	DAG1	c	g	111	0.93	++	0.3525	0.928235
	Ventricular_Volume	Longitudinal	rs73074830	3	49539584	DAG1	a	c	111	0.204	++	0.8382	0.96585
	Ventricular_Volume	Longitudinal	rs114093899	3	49539955	DAG1	c	g	111	-0.397	-+	0.6913	0.96585
	Ventricular_Volume	Longitudinal	rs9789109	18	26842291	AQP4	a	g	111	1.219	++	0.2227	0.928235
	Ventricular_Volume	Longitudinal	rs10164026	18	26842362	AQP4	a	c	111	0.178	+-	0.8586	0.972134
	Ventricular_Volume	Longitudinal	rs4800270	18	26844933	AQP4	t	g	111	-0.208	--	0.835	0.96585
	Ventricular_Volume	Longitudinal	rs79668602	18	26845488	AQP4	a	g	111	-2.184	--	0.02895	0.579373
	Ventricular_Volume	Longitudinal	rs12458416	18	26847267	AQP4	c	g	111	0.314	+-	0.7535	0.96585
	Ventricular_Volume	Longitudinal	rs12953446	18	26848521	AQP4	a	g	111	0.328	-+	0.7429	0.96585
	Ventricular_Volume	Longitudinal	rs67461489	18	26848876	AQP4	t	c	111	1.332	++	0.1829	0.928235
	Ventricular_Volume	Longitudinal	rs11661081	18	26850068	AQP4	a	c	111	0.503	-+	0.6147	0.96585
	Ventricular_Volume	Longitudinal	rs3763043	18	26855854	AQP4	t	c	111	0.059	+-	0.9528	0.987516
	Ventricular_Volume	Longitudinal	rs68006382	18	26856555	AQP4	a	g	111	0.544	-+	0.5863	0.96585
	Ventricular_Volume	Longitudinal	rs335930	18	26856961	AQP4	a	c	111	-0.99	--	0.322	0.928235
	Ventricular_Volume	Longitudinal	rs71353405	18	26857429	AQP4	t	c	111	-0.998	+-	0.3185	0.928235
	Ventricular_Volume	Longitudinal	rs162009	18	26864250	AQP4	a	g	111	0.034	+-	0.9731	0.987516
	Ventricular_Volume	Longitudinal	rs4800773	18	26865017	AQP4	a	g	111	-1.698	--	0.08947	0.909338
	Ventricular_Volume	Longitudinal	rs3875089	18	26865469	AQP4	t	c	111	2.384	++	0.01711	0.579373
	Ventricular_Volume	Longitudinal	rs72878787	18	26866517	AQP4	a	g	111	-0.351	+-	0.7257	0.96585
	Ventricular_Volume	Longitudinal	rs162006	18	26866570	AQP4	t	c	111	-1.044	--	0.2965	0.928235
	Ventricular_Volume	Longitudinal	rs151244	18	26866755	AQP4	t	c	111	1.631	++	0.1028	0.909338
	Ventricular_Volume	Longitudinal	rs72878794	18	26866839	AQP4	t	c	111	0.878	++	0.3797	0.928235
	Ventricular_Volume	Longitudinal	rs9961118	18	26866901	AQP4	t	c	111	2.114	++	0.03455	0.579373
	Ventricular_Volume	Longitudinal	rs162004	18	26867972	AQP4	c	g	111	-0.42	+-	0.6744	0.96585
	Ventricular_Volume	Longitudinal	rs72878799	18	26868165	AQP4	a	g	111	-1.057	--	0.2903	0.928235
	Ventricular_Volume	Longitudinal	rs11662318	18	26869056	AQP4	t	c	111	-1.079	+-	0.2804	0.928235
	Ventricular_Volume	Longitudinal	rs151246	18	26869139	AQP4	t	g	111	0.313	++	0.7545	0.96585
	Ventricular_Volume	Longitudinal	rs491148	18	26869803	AQP4	a	g	111	2.051	-+	0.04026	0.579373
	Ventricular_Volume	Longitudinal	rs162002	18	26871015	AQP4	a	g	111	2.048	++	0.0406	0.579373
	Ventricular_Volume	Longitudinal	rs162001	18	26871481	AQP4	a	c	111	0.064	+-	0.9488	0.987516
	Ventricular_Volume	Longitudinal	rs3865411	18	26871684	AQP4	a	g	111	0.944	-+	0.3452	0.928235
	Ventricular_Volume	Longitudinal	rs162000	18	26872471	AQP4	a	c	111	1.697	++	0.08966	0.909338
	Ventricular_Volume	Longitudinal	rs12969503	18	26873564	AQP4	t	g	111	1.656	++	0.09774	0.909338
	Ventricular_Volume	Longitudinal	rs8094228	18	26873767	AQP4	t	c	111	0.047	-+	0.9627	0.987516
	Ventricular_Volume	Longitudinal	rs480647	18	26874290	AQP4	t	c	111	0.753	+-	0.4514	0.96585
	Ventricular_Volume	Longitudinal	rs10502478	18	26874616	AQP4	a	c	111	-0.587	-+	0.5574	0.96585
	Ventricular_Volume	Longitudinal	rs7234562	18	34483685	DTNA	t	c	111	0.629	-+	0.5296	0.96585
	Ventricular_Volume	Longitudinal	rs79922046	18	34485536	DTNA	a	g	111	0.39	-+	0.6964	0.96585
	Ventricular_Volume	Longitudinal	rs9955950	18	34485672	DTNA	t	c	111	0.475	++	0.6345	0.96585
	Ventricular_Volume	Longitudinal	rs12957028	18	34485948	DTNA	a	g	111	-0.667	+-	0.5049	0.96585
	Ventricular_Volume	Longitudinal	rs72639491	18	34491438	DTNA	a	g	111	0.076	-+	0.9393	0.987516
	Ventricular_Volume	Longitudinal	rs62097347	18	34492032	DTNA	c	g	111	-0.347	--	0.7288	0.96585
	Ventricular_Volume	Longitudinal	rs9961251	18	34492344	DTNA	t	c	111	0.017	-+	0.9868	0.994056
	Ventricular_Volume	Longitudinal	rs111846993	18	34494001	DTNA	t	c	111	0.042	-+	0.9664	0.987516
	Ventricular_Volume	Longitudinal	rs4799769	18	34494577	DTNA	c	g	111	1.327	++	0.1845	0.928235
	Ventricular_Volume	Longitudinal	rs8092794	18	34496273	DTNA	a	g	111	-0.932	--	0.3515	0.928235
	Ventricular_Volume	Longitudinal	rs7243528	18	34497055	DTNA	t	c	111	0.545	-+	0.586	0.96585
	Ventricular_Volume	Longitudinal	rs79972565	18	34497194	DTNA	t	g	111	0.934	-+	0.3505	0.928235
	Ventricular_Volume	Longitudinal	rs35839923	18	34497764	DTNA	a	g	111	0.118	+-	0.9057	0.987516
	Ventricular_Volume	Longitudinal	rs62097349	18	34499519	DTNA	a	g	111	-0.099	--	0.921	0.987516
	Ventricular_Volume	Longitudinal	rs9965622	18	34502153	DTNA	t	c	111	-0.286	-+	0.7753	0.96585
	Ventricular_Volume	Longitudinal	rs62098462	18	34504364	DTNA	t	c	111	-0.289	--	0.7726	0.96585
	Ventricular_Volume	Longitudinal	rs75127284	18	34506592	DTNA	a	c	111	-0.788	+-	0.4307	0.96585
	Ventricular_Volume	Longitudinal	rs2439861	18	34507940	DTNA	a	g	111	0.619	-+	0.536	0.96585
	Ventricular_Volume	Longitudinal	rs35982920	18	34516411	DTNA	a	g	111	1.047	++	0.2952	0.928235
	Ventricular_Volume	Longitudinal	rs2509597	18	34528430	DTNA	a	t	111	1.029	-+	0.3037	0.928235
	Ventricular_Volume	Longitudinal	rs71363449	18	34531997	DTNA	t	c	111	0.605	++	0.5449	0.96585
	Ventricular_Volume	Longitudinal	rs2439853	18	34533937	DTNA	a	g	111	-0.433	+-	0.6647	0.96585
	Ventricular_Volume	Longitudinal	rs2439000	18	34536414	DTNA	c	g	111	1.08	-+	0.2799	0.928235
	Ventricular_Volume	Longitudinal	rs11875892	18	34544032	DTNA	a	g	111	1.033	++	0.3014	0.928235
	Ventricular_Volume	Longitudinal	rs1967583	18	34544573	DTNA	t	c	111	0.706	-+	0.4799	0.96585
	Ventricular_Volume	Longitudinal	rs28856895	18	34555507	DTNA	a	g	111	-0.223	--	0.8239	0.96585
	Ventricular_Volume	Longitudinal	rs77973497	18	34560529	DTNA	a	c	111	0.722	-+	0.4702	0.96585
	Ventricular_Volume	Longitudinal	rs2579796	18	34569243	DTNA	a	g	111	-0.75	+-	0.453	0.96585
	Ventricular_Volume	Longitudinal	rs2579797	18	34571732	DTNA	t	g	111	-1.152	+-	0.2492	0.928235
	Ventricular_Volume	Longitudinal	rs2685557	18	34576782	DTNA	t	c	111	-0.75	+-	0.453	0.96585
	Ventricular_Volume	Longitudinal	rs9958492	18	34577783	DTNA	t	c	111	0.232	+-	0.8164	0.96585
	Ventricular_Volume	Longitudinal	rs2579802	18	34579787	DTNA	a	c	111	-1.363	--	0.1729	0.928235
	Ventricular_Volume	Longitudinal	rs74920018	18	34607557	DTNA	a	t	111	0.663	-+	0.5075	0.96585
	Ventricular_Volume	Longitudinal	rs1439127	18	34607759	DTNA	a	t	111	0.56	+-	0.5753	0.96585
	Ventricular_Volume	Longitudinal	rs12327368	18	34611361	DTNA	a	g	111	0.232	+-	0.8164	0.96585
	Ventricular_Volume	Longitudinal	rs62097188	18	34611412	DTNA	a	g	111	-1.009	--	0.3129	0.928235
	Ventricular_Volume	Longitudinal	rs9807153	18	34635520	DTNA	a	t	111	0.244	+-	0.8071	0.96585
	Ventricular_Volume	Longitudinal	rs2730126	18	34635939	DTNA	a	c	111	-0.899	+-	0.3686	0.928235
	Ventricular_Volume	Longitudinal	rs1659526	18	34644451	DTNA	a	g	111	-0.871	+-	0.3837	0.928235
	Ventricular_Volume	Longitudinal	rs17642885	18	34649976	DTNA	t	c	111	-0.006	-+	0.9955	0.9955
	Ventricular_Volume	Longitudinal	rs1240974	18	34650949	DTNA	t	c	111	-0.758	+-	0.4486	0.96585
	Ventricular_Volume	Longitudinal	rs55869511	18	34651262	DTNA	a	c	111	-0.477	--	0.6333	0.96585
	Ventricular_Volume	Longitudinal	rs12955208	18	34656737	DTNA	a	g	111	0.199	-+	0.8424	0.96585
	Ventricular_Volume	Longitudinal	rs72953203	18	34660068	DTNA	a	g	111	0.385	++	0.7004	0.96585
	Ventricular_Volume	Longitudinal	rs9946070	18	34665505	DTNA	a	g	111	-0.136	+-	0.8919	0.987516
	Ventricular_Volume	Longitudinal	rs72953211	18	34673381	DTNA	a	c	111	0.883	-+	0.3773	0.928235
	Ventricular_Volume	Longitudinal	rs55971592	18	34697328	DTNA	a	g	111	0.697	-+	0.4859	0.96585
	Ventricular_Volume	Longitudinal	rs78837792	18	34703359	DTNA	t	c	111	-0.24	--	0.81	0.96585
	Ventricular_Volume	Longitudinal	rs11663468	18	34707936	DTNA	t	c	111	-0.373	+-	0.7089	0.96585
	Ventricular_Volume	Longitudinal	rs12963825	18	34709484	DTNA	a	g	111	0.406	+-	0.6845	0.96585
	Ventricular_Volume	Longitudinal	rs1480432	18	34727166	DTNA	t	g	111	0.194	+-	0.846	0.96585
	Ventricular_Volume	Longitudinal	rs45556134	18	34729425	DTNA	a	g	111	-0.589	+-	0.5555	0.96585
	Ventricular_Volume	Longitudinal	rs899828	18	34732688	DTNA	t	g	111	-2.031	--	0.04229	0.579373
	Ventricular_Volume	Longitudinal	rs17556884	18	34736455	DTNA	t	c	111	-0.568	--	0.5702	0.96585
	Ventricular_Volume	Longitudinal	rs1480428	18	34738732	DTNA	a	g	111	-0.099	-+	0.921	0.987516
	Ventricular_Volume	Longitudinal	rs12957349	18	34739291	DTNA	t	c	111	0.199	-+	0.8424	0.96585
	Ventricular_Volume	Longitudinal	rs12608110	18	34752198	DTNA	a	g	111	-1.452	--	0.1465	0.928235
	Ventricular_Volume	Longitudinal	rs7228547	18	34760039	DTNA	a	g	111	0.373	-+	0.7089	0.96585
	Ventricular_Volume	Longitudinal	rs8099437	18	34761448	DTNA	t	g	111	-0.099	-+	0.921	0.987516
	Ventricular_Volume	Longitudinal	rs72955132	18	34762382	DTNA	a	g	111	-0.568	--	0.5702	0.96585
	Ventricular_Volume	Longitudinal	rs1817452	18	34776629	DTNA	t	c	111	0.167	-+	0.8675	0.97416
	Ventricular_Volume	Longitudinal	rs56404226	18	34778060	DTNA	a	g	111	2.192	++	0.0284	0.579373
	Ventricular_Volume	Longitudinal	rs72955175	18	34779045	DTNA	a	t	111	-0.468	-+	0.6397	0.96585
	Ventricular_Volume	Longitudinal	rs12608251	18	34782906	DTNA	t	g	111	0.736	++	0.4616	0.96585
	Ventricular_Volume	Longitudinal	rs76880720	18	34791141	DTNA	a	c	111	-0.304	+-	0.7611	0.96585
	Ventricular_Volume	Longitudinal	rs9989533	18	34793909	DTNA	t	c	111	-1.022	--	0.3067	0.928235
	Ventricular_Volume	Longitudinal	rs79500711	18	34794379	DTNA	a	g	111	-0.443	-+	0.6575	0.96585
	Ventricular_Volume	Longitudinal	rs138856611	18	34801684	DTNA	t	g	111	-1.275	--	0.2022	0.928235
	Ventricular_Volume	Longitudinal	rs62097226	18	34804223	DTNA	a	t	111	0.616	++	0.5379	0.96585
	Ventricular_Volume	Longitudinal	rs4458079	18	34806161	DTNA	t	c	111	0.977	++	0.3283	0.928235
	Ventricular_Volume	Longitudinal	rs8086358	18	34813672	DTNA	t	g	111	0.445	+-	0.6565	0.96585
	Ventricular_Volume	Longitudinal	rs72963047	18	34818804	DTNA	a	c	111	-0.514	--	0.6074	0.96585
	Ventricular_Volume	Longitudinal	rs17557660	18	34831178	DTNA	a	t	111	-2.207	--	0.02734	0.579373
	Ventricular_Volume	Longitudinal	rs1790533	18	34831631	DTNA	a	g	111	0.578	++	0.5632	0.96585
	Ventricular_Volume	Longitudinal	rs4799782	18	34841123	DTNA	a	g	111	1.279	++	0.2008	0.928235
	Ventricular_Volume	Longitudinal	rs1786604	18	34846264	DTNA	a	g	111	-0.496	-+	0.6202	0.96585
	Ventricular_Volume	Longitudinal	rs7233779	18	34863262	DTNA	a	g	111	-0.944	+-	0.3452	0.928235
	Ventricular_Volume	Longitudinal	rs644982	18	34869793	DTNA	a	g	111	1.373	+-	0.1697	0.928235
	Ventricular_Volume	Longitudinal	rs11659517	18	34870978	DTNA	a	t	111	-0.299	-+	0.7648	0.96585
	Ventricular_Volume	Longitudinal	rs524969	18	34872102	DTNA	a	t	111	-1.048	--	0.2946	0.928235
	Ventricular_Volume	Longitudinal	rs637914	18	34876135	DTNA	a	t	111	-1.464	--	0.1432	0.928235
	Ventricular_Volume	Longitudinal	rs9304141	18	34879143	DTNA	t	c	111	2.307	++	0.02103	0.579373
	Ventricular_Volume	Longitudinal	rs2288085	18	34879740	DTNA	a	g	111	0.974	++	0.3302	0.928235
	Ventricular_Volume	Longitudinal	rs17558116	18	34882719	DTNA	t	c	111	0.53	++	0.5963	0.96585
	Ventricular_Volume	Longitudinal	rs10502637	18	34890006	DTNA	t	c	111	1.268	++	0.2047	0.928235
	Ventricular_Volume	Longitudinal	rs149163416	18	34898841	DTNA	a	g	111	-2.136	--	0.03268	0.579373
	Ventricular_Volume	Longitudinal	20:33413780	20	33413780	SNTA1	a	t	111	1.95	++	0.05123	0.638046
	Ventricular_Volume	Longitudinal	rs291683	20	33431611	SNTA1	t	c	111	1.616	++	0.1062	0.909338
	Ventricular_Volume	Longitudinal	20:33433270	20	33433270	SNTA1	t	c	111	-0.867	--	0.3862	0.928235
	Ventricular_Volume	Longitudinal	rs6141396	20	33436147	SNTA1	a	c	47	-1.554	-?	0.1203	0.928235
	Ventricular_Volume	Longitudinal	rs293721	20	33441633	SNTA1	t	c	111	-0.289	-+	0.7729	0.96585
	White_Matter_Volume	Cross-Sectional	rs111599092	3	49465346	DAG1	a	g	338	0.982	-+	0.3261	0.96722
	White_Matter_Volume	Cross-Sectional	rs73073015	3	49465733	DAG1	a	g	338	0.132	-+	0.8952	0.970713
	White_Matter_Volume	Cross-Sectional	rs7611164	3	49471395	DAG1	t	g	338	1.29	++	0.1969	0.96722
	White_Matter_Volume	Cross-Sectional	rs1568661	3	49483525	DAG1	a	g	338	-0.113	+-	0.9099	0.970713
	White_Matter_Volume	Cross-Sectional	rs7374731	3	49495661	DAG1	c	g	338	-0.124	+-	0.9011	0.970713
	White_Matter_Volume	Cross-Sectional	rs73074811	3	49516098	DAG1	a	t	338	-0.005	+-	0.996	0.996
	White_Matter_Volume	Cross-Sectional	rs3870338	3	49519618	DAG1	a	g	338	-0.113	+-	0.9099	0.970713
	White_Matter_Volume	Cross-Sectional	rs55935606	3	49528072	DAG1	a	g	338	0.559	-+	0.5758	0.96722
	White_Matter_Volume	Cross-Sectional	rs75153130	3	49530436	DAG1	a	c	338	-1.29	--	0.1969	0.96722
	White_Matter_Volume	Cross-Sectional	rs13079082	3	49537375	DAG1	c	g	338	0.185	+-	0.8531	0.970713
	White_Matter_Volume	Cross-Sectional	rs4052546	3	49538116	DAG1	c	g	338	0.124	-+	0.9011	0.970713
	White_Matter_Volume	Cross-Sectional	rs73074830	3	49539584	DAG1	a	c	338	-0.375	+-	0.7073	0.970713
	White_Matter_Volume	Cross-Sectional	rs114093899	3	49539955	DAG1	c	g	338	-1.157	--	0.2472	0.96722
	White_Matter_Volume	Cross-Sectional	rs9789109	18	26842291	AQP4	a	g	338	0.681	++	0.4957	0.96722
	White_Matter_Volume	Cross-Sectional	rs10164026	18	26842362	AQP4	a	c	338	-1.497	--	0.1344	0.96722
	White_Matter_Volume	Cross-Sectional	rs4800270	18	26844933	AQP4	t	g	338	-0.302	+-	0.7625	0.970713
	White_Matter_Volume	Cross-Sectional	rs79668602	18	26845488	AQP4	a	g	338	-0.616	--	0.5382	0.96722
	White_Matter_Volume	Cross-Sectional	rs12458416	18	26847267	AQP4	c	g	338	-0.954	--	0.3403	0.96722
	White_Matter_Volume	Cross-Sectional	rs12953446	18	26848521	AQP4	a	g	338	-0.245	+-	0.8064	0.970713
	White_Matter_Volume	Cross-Sectional	rs67461489	18	26848876	AQP4	t	c	338	0.28	-+	0.7794	0.970713
	White_Matter_Volume	Cross-Sectional	rs11661081	18	26850068	AQP4	a	c	338	1.729	++	0.08372	0.96722
	White_Matter_Volume	Cross-Sectional	rs3763043	18	26855854	AQP4	t	c	338	0.034	-+	0.9728	0.987212
	White_Matter_Volume	Cross-Sectional	rs68006382	18	26856555	AQP4	a	g	338	0.371	+-	0.7104	0.970713
	White_Matter_Volume	Cross-Sectional	rs335930	18	26856961	AQP4	a	c	338	0.62	-+	0.5352	0.96722
	White_Matter_Volume	Cross-Sectional	rs71353405	18	26857429	AQP4	t	c	338	0.295	+-	0.7678	0.970713
	White_Matter_Volume	Cross-Sectional	rs162009	18	26864250	AQP4	a	g	338	-0.259	+-	0.796	0.970713
	White_Matter_Volume	Cross-Sectional	rs4800773	18	26865017	AQP4	a	g	338	0.193	++	0.8467	0.970713
	White_Matter_Volume	Cross-Sectional	rs3875089	18	26865469	AQP4	t	c	338	1.413	-+	0.1575	0.96722
	White_Matter_Volume	Cross-Sectional	rs72878787	18	26866517	AQP4	a	g	338	-1.116	--	0.2645	0.96722
	White_Matter_Volume	Cross-Sectional	rs162006	18	26866570	AQP4	t	c	338	0.195	+-	0.8455	0.970713
	White_Matter_Volume	Cross-Sectional	rs151244	18	26866755	AQP4	t	c	338	0.783	++	0.4337	0.96722
	White_Matter_Volume	Cross-Sectional	rs72878794	18	26866839	AQP4	t	c	338	1.009	-+	0.3132	0.96722
	White_Matter_Volume	Cross-Sectional	rs9961118	18	26866901	AQP4	t	c	338	4.359	++	1.309e-05	0.00179333
	White_Matter_Volume	Cross-Sectional	rs162004	18	26867972	AQP4	c	g	338	-1.111	--	0.2665	0.96722
	White_Matter_Volume	Cross-Sectional	rs72878799	18	26868165	AQP4	a	g	338	-1.345	+-	0.1787	0.96722
	White_Matter_Volume	Cross-Sectional	rs11662318	18	26869056	AQP4	t	c	338	-0.657	--	0.5113	0.96722
	White_Matter_Volume	Cross-Sectional	rs151246	18	26869139	AQP4	t	g	338	-0.672	--	0.5019	0.96722
	White_Matter_Volume	Cross-Sectional	rs491148	18	26869803	AQP4	a	g	338	1.567	++	0.117	0.96722
	White_Matter_Volume	Cross-Sectional	rs162002	18	26871015	AQP4	a	g	338	2.711	++	0.006705	0.334006
	White_Matter_Volume	Cross-Sectional	rs162001	18	26871481	AQP4	a	c	338	-1.543	+-	0.1229	0.96722
	White_Matter_Volume	Cross-Sectional	rs3865411	18	26871684	AQP4	a	g	338	2.682	++	0.007314	0.334006
	White_Matter_Volume	Cross-Sectional	rs162000	18	26872471	AQP4	a	c	338	2.241	++	0.02505	0.857962
	White_Matter_Volume	Cross-Sectional	rs12969503	18	26873564	AQP4	t	g	338	1.338	++	0.181	0.96722
	White_Matter_Volume	Cross-Sectional	rs8094228	18	26873767	AQP4	t	c	338	-1.539	--	0.1239	0.96722
	White_Matter_Volume	Cross-Sectional	rs480647	18	26874290	AQP4	t	c	338	0.911	++	0.3625	0.96722
	White_Matter_Volume	Cross-Sectional	rs10502478	18	26874616	AQP4	a	c	338	-2.146	--	0.0319	0.862187
	White_Matter_Volume	Cross-Sectional	rs7234562	18	34483685	DTNA	t	c	338	-0.245	+-	0.8066	0.970713
	White_Matter_Volume	Cross-Sectional	rs79922046	18	34485536	DTNA	a	g	338	0.743	-+	0.4574	0.96722
	White_Matter_Volume	Cross-Sectional	rs9955950	18	34485672	DTNA	t	c	338	-1.257	--	0.2087	0.96722
	White_Matter_Volume	Cross-Sectional	rs12957028	18	34485948	DTNA	a	g	338	0.855	-+	0.3926	0.96722
	White_Matter_Volume	Cross-Sectional	rs72639491	18	34491438	DTNA	a	g	338	0.32	-+	0.7491	0.970713
	White_Matter_Volume	Cross-Sectional	rs62097347	18	34492032	DTNA	c	g	338	1.572	++	0.116	0.96722
	White_Matter_Volume	Cross-Sectional	rs9961251	18	34492344	DTNA	t	c	338	0.743	++	0.4575	0.96722
	White_Matter_Volume	Cross-Sectional	rs111846993	18	34494001	DTNA	t	c	338	1.062	++	0.2881	0.96722
	White_Matter_Volume	Cross-Sectional	rs4799769	18	34494577	DTNA	c	g	338	0.492	+-	0.6229	0.96722
	White_Matter_Volume	Cross-Sectional	rs8092794	18	34496273	DTNA	a	g	338	-0.426	--	0.6702	0.96722
	White_Matter_Volume	Cross-Sectional	rs7243528	18	34497055	DTNA	t	c	338	0.097	-+	0.923	0.970713
	White_Matter_Volume	Cross-Sectional	rs79972565	18	34497194	DTNA	t	g	338	-0.541	-+	0.5882	0.96722
	White_Matter_Volume	Cross-Sectional	rs35839923	18	34497764	DTNA	a	g	338	-0.961	--	0.3364	0.96722
	White_Matter_Volume	Cross-Sectional	rs62097349	18	34499519	DTNA	a	g	338	-0.638	--	0.5237	0.96722
	White_Matter_Volume	Cross-Sectional	rs9965622	18	34502153	DTNA	t	c	338	-0.584	--	0.5595	0.96722
	White_Matter_Volume	Cross-Sectional	rs62098462	18	34504364	DTNA	t	c	338	0.355	++	0.7222	0.970713
	White_Matter_Volume	Cross-Sectional	rs75127284	18	34506592	DTNA	a	c	338	-0.45	+-	0.6529	0.96722
	White_Matter_Volume	Cross-Sectional	rs2439861	18	34507940	DTNA	a	g	338	-0.113	-+	0.9102	0.970713
	White_Matter_Volume	Cross-Sectional	rs35982920	18	34516411	DTNA	a	g	338	-0.603	--	0.5462	0.96722
	White_Matter_Volume	Cross-Sectional	rs2509597	18	34528430	DTNA	a	t	338	-0.036	-+	0.9714	0.987212
	White_Matter_Volume	Cross-Sectional	rs71363449	18	34531997	DTNA	t	c	338	-1.421	+-	0.1553	0.96722
	White_Matter_Volume	Cross-Sectional	rs2439853	18	34533937	DTNA	a	g	338	-0.577	+-	0.5636	0.96722
	White_Matter_Volume	Cross-Sectional	rs2439000	18	34536414	DTNA	c	g	338	-0.446	-+	0.6554	0.96722
	White_Matter_Volume	Cross-Sectional	rs11875892	18	34544032	DTNA	a	g	338	-0.446	+-	0.6556	0.96722
	White_Matter_Volume	Cross-Sectional	rs1967583	18	34544573	DTNA	t	c	338	0.425	-+	0.6707	0.96722
	White_Matter_Volume	Cross-Sectional	rs28856895	18	34555507	DTNA	a	g	338	-0.582	+-	0.5608	0.96722
	White_Matter_Volume	Cross-Sectional	rs77973497	18	34560529	DTNA	a	c	338	0.602	++	0.5473	0.96722
	White_Matter_Volume	Cross-Sectional	rs2579796	18	34569243	DTNA	a	g	338	-0.206	+-	0.8364	0.970713
	White_Matter_Volume	Cross-Sectional	rs2579797	18	34571732	DTNA	t	g	338	0.718	+-	0.4726	0.96722
	White_Matter_Volume	Cross-Sectional	rs2685557	18	34576782	DTNA	t	c	338	-0.289	+-	0.7723	0.970713
	White_Matter_Volume	Cross-Sectional	rs9958492	18	34577783	DTNA	t	c	338	-1.164	+-	0.2446	0.96722
	White_Matter_Volume	Cross-Sectional	rs2579802	18	34579787	DTNA	a	c	338	0.318	+-	0.7507	0.970713
	White_Matter_Volume	Cross-Sectional	rs74920018	18	34607557	DTNA	a	t	338	0.484	++	0.6282	0.96722
	White_Matter_Volume	Cross-Sectional	rs1439127	18	34607759	DTNA	a	t	338	-0.829	--	0.4069	0.96722
	White_Matter_Volume	Cross-Sectional	rs12327368	18	34611361	DTNA	a	g	338	-1.05	+-	0.2938	0.96722
	White_Matter_Volume	Cross-Sectional	rs62097188	18	34611412	DTNA	a	g	338	0.617	-+	0.5373	0.96722
	White_Matter_Volume	Cross-Sectional	rs9807153	18	34635520	DTNA	a	t	338	0.247	-+	0.8048	0.970713
	White_Matter_Volume	Cross-Sectional	rs2730126	18	34635939	DTNA	a	c	338	-0.51	+-	0.6103	0.96722
	White_Matter_Volume	Cross-Sectional	rs1659526	18	34644451	DTNA	a	g	338	-0.09	+-	0.9282	0.970713
	White_Matter_Volume	Cross-Sectional	rs17642885	18	34649976	DTNA	t	c	338	0.757	++	0.449	0.96722
	White_Matter_Volume	Cross-Sectional	rs1240974	18	34650949	DTNA	t	c	338	0.169	++	0.8658	0.970713
	White_Matter_Volume	Cross-Sectional	rs55869511	18	34651262	DTNA	a	c	338	0.883	-+	0.377	0.96722
	White_Matter_Volume	Cross-Sectional	rs12955208	18	34656737	DTNA	a	g	338	0.542	-+	0.5876	0.96722
	White_Matter_Volume	Cross-Sectional	rs72953203	18	34660068	DTNA	a	g	338	0.841	++	0.4001	0.96722
	White_Matter_Volume	Cross-Sectional	rs9946070	18	34665505	DTNA	a	g	338	-0.676	+-	0.4987	0.96722
	White_Matter_Volume	Cross-Sectional	rs72953211	18	34673381	DTNA	a	c	338	0.162	+-	0.8713	0.970713
	White_Matter_Volume	Cross-Sectional	rs55971592	18	34697328	DTNA	a	g	338	0.063	+-	0.95	0.978571
	White_Matter_Volume	Cross-Sectional	rs78837792	18	34703359	DTNA	t	c	338	0.315	-+	0.7527	0.970713
	White_Matter_Volume	Cross-Sectional	rs11663468	18	34707936	DTNA	t	c	338	-0.36	--	0.7186	0.970713
	White_Matter_Volume	Cross-Sectional	rs12963825	18	34709484	DTNA	a	g	338	-0.759	+-	0.4478	0.96722
	White_Matter_Volume	Cross-Sectional	rs1480432	18	34727166	DTNA	t	g	338	-0.261	+-	0.7945	0.970713
	White_Matter_Volume	Cross-Sectional	rs45556134	18	34729425	DTNA	a	g	338	0.571	++	0.5678	0.96722
	White_Matter_Volume	Cross-Sectional	rs899828	18	34732688	DTNA	t	g	338	0.458	-+	0.647	0.96722
	White_Matter_Volume	Cross-Sectional	rs17556884	18	34736455	DTNA	t	c	338	0.872	-+	0.3831	0.96722
	White_Matter_Volume	Cross-Sectional	rs1480428	18	34738732	DTNA	a	g	338	0.734	-+	0.4629	0.96722
	White_Matter_Volume	Cross-Sectional	rs12957349	18	34739291	DTNA	t	c	338	0.486	-+	0.6269	0.96722
	White_Matter_Volume	Cross-Sectional	rs12608110	18	34752198	DTNA	a	g	338	2.077	-+	0.03776	0.862187
	White_Matter_Volume	Cross-Sectional	rs7228547	18	34760039	DTNA	a	g	338	0.22	+-	0.8259	0.970713
	White_Matter_Volume	Cross-Sectional	rs8099437	18	34761448	DTNA	t	g	338	0.474	-+	0.6357	0.96722
	White_Matter_Volume	Cross-Sectional	rs72955132	18	34762382	DTNA	a	g	338	0.764	-+	0.4447	0.96722
	White_Matter_Volume	Cross-Sectional	rs1817452	18	34776629	DTNA	t	c	338	0.431	-+	0.6662	0.96722
	White_Matter_Volume	Cross-Sectional	rs56404226	18	34778060	DTNA	a	g	338	-1.429	+-	0.1529	0.96722
	White_Matter_Volume	Cross-Sectional	rs72955175	18	34779045	DTNA	a	t	338	0.393	++	0.6943	0.970713
	White_Matter_Volume	Cross-Sectional	rs12608251	18	34782906	DTNA	t	g	338	0.157	-+	0.8753	0.970713
	White_Matter_Volume	Cross-Sectional	rs76880720	18	34791141	DTNA	a	c	338	-0.66	+-	0.5095	0.96722
	White_Matter_Volume	Cross-Sectional	rs9989533	18	34793909	DTNA	t	c	338	0.868	-+	0.3856	0.96722
	White_Matter_Volume	Cross-Sectional	rs79500711	18	34794379	DTNA	a	g	338	-0.498	--	0.6188	0.96722
	White_Matter_Volume	Cross-Sectional	rs138856611	18	34801684	DTNA	t	g	338	0.683	++	0.4943	0.96722
	White_Matter_Volume	Cross-Sectional	rs62097226	18	34804223	DTNA	a	t	338	-0.794	--	0.4269	0.96722
	White_Matter_Volume	Cross-Sectional	rs4458079	18	34806161	DTNA	t	c	338	-0.75	--	0.4532	0.96722
	White_Matter_Volume	Cross-Sectional	rs8086358	18	34813672	DTNA	t	g	338	-1.164	--	0.2446	0.96722
	White_Matter_Volume	Cross-Sectional	rs72963047	18	34818804	DTNA	a	c	338	-0.104	--	0.9173	0.970713
	White_Matter_Volume	Cross-Sectional	rs17557660	18	34831178	DTNA	a	t	338	1.029	-+	0.3033	0.96722
	White_Matter_Volume	Cross-Sectional	rs1790533	18	34831631	DTNA	a	g	338	-0.076	-+	0.9396	0.975191
	White_Matter_Volume	Cross-Sectional	rs4799782	18	34841123	DTNA	a	g	338	-0.904	--	0.366	0.96722
	White_Matter_Volume	Cross-Sectional	rs1786604	18	34846264	DTNA	a	g	338	0.924	++	0.3556	0.96722
	White_Matter_Volume	Cross-Sectional	rs7233779	18	34863262	DTNA	a	g	338	0.69	++	0.4903	0.96722
	White_Matter_Volume	Cross-Sectional	rs644982	18	34869793	DTNA	a	g	338	-1.759	--	0.07863	0.96722
	White_Matter_Volume	Cross-Sectional	rs11659517	18	34870978	DTNA	a	t	338	0.92	-+	0.3578	0.96722
	White_Matter_Volume	Cross-Sectional	rs524969	18	34872102	DTNA	a	t	338	0.607	++	0.544	0.96722
	White_Matter_Volume	Cross-Sectional	rs637914	18	34876135	DTNA	a	t	338	0.657	++	0.5112	0.96722
	White_Matter_Volume	Cross-Sectional	rs9304141	18	34879143	DTNA	t	c	338	-1.161	--	0.2458	0.96722
	White_Matter_Volume	Cross-Sectional	rs2288085	18	34879740	DTNA	a	g	338	-0.821	+-	0.4114	0.96722
	White_Matter_Volume	Cross-Sectional	rs17558116	18	34882719	DTNA	t	c	338	0.243	-+	0.8082	0.970713
	White_Matter_Volume	Cross-Sectional	rs10502637	18	34890006	DTNA	t	c	338	0.227	-+	0.8207	0.970713
	White_Matter_Volume	Cross-Sectional	rs149163416	18	34898841	DTNA	a	g	338	1.439	++	0.1501	0.96722
	White_Matter_Volume	Cross-Sectional	20:33413780	20	33413780	SNTA1	a	t	338	-0.025	+-	0.9804	0.987609
	White_Matter_Volume	Cross-Sectional	rs291683	20	33431611	SNTA1	t	c	338	0.86	++	0.3895	0.96722
	White_Matter_Volume	Cross-Sectional	20:33433270	20	33433270	SNTA1	t	c	338	0.538	++	0.5909	0.96722
	White_Matter_Volume	Cross-Sectional	rs6141396	20	33436147	SNTA1	a	c	93	0.588	+?	0.5568	0.96722
	White_Matter_Volume	Cross-Sectional	rs293721	20	33441633	SNTA1	t	c	338	-1.937	+-	0.05279	0.96722
	White_Matter_Volume	Longitudinal	rs111599092	3	49465346	DAG1	a	g	111	-0.405	+-	0.6856	0.81795
	White_Matter_Volume	Longitudinal	rs73073015	3	49465733	DAG1	a	g	111	-0.507	--	0.6124	0.811593
	White_Matter_Volume	Longitudinal	rs7611164	3	49471395	DAG1	t	g	111	-0.087	-+	0.9305	0.968964
	White_Matter_Volume	Longitudinal	rs1568661	3	49483525	DAG1	a	g	111	1.325	++	0.1853	0.497767
	White_Matter_Volume	Longitudinal	rs7374731	3	49495661	DAG1	c	g	111	0.823	++	0.4104	0.670811
	White_Matter_Volume	Longitudinal	rs73074811	3	49516098	DAG1	a	t	111	-1.141	-+	0.2538	0.551914
	White_Matter_Volume	Longitudinal	rs3870338	3	49519618	DAG1	a	g	111	1.325	++	0.1853	0.497767
	White_Matter_Volume	Longitudinal	rs55935606	3	49528072	DAG1	a	g	111	-1.128	--	0.2594	0.555278
	White_Matter_Volume	Longitudinal	rs75153130	3	49530436	DAG1	a	c	111	0.087	+-	0.9305	0.968964
	White_Matter_Volume	Longitudinal	rs13079082	3	49537375	DAG1	c	g	111	-0.942	--	0.346	0.624228
	White_Matter_Volume	Longitudinal	rs4052546	3	49538116	DAG1	c	g	111	-0.823	--	0.4104	0.670811
	White_Matter_Volume	Longitudinal	rs73074830	3	49539584	DAG1	a	c	111	0.521	-+	0.6025	0.810315
	White_Matter_Volume	Longitudinal	rs114093899	3	49539955	DAG1	c	g	111	-0.289	--	0.7728	0.874988
	White_Matter_Volume	Longitudinal	rs9789109	18	26842291	AQP4	a	g	111	0.067	+-	0.9468	0.970081
	White_Matter_Volume	Longitudinal	rs10164026	18	26842362	AQP4	a	c	111	-0.611	--	0.5414	0.772623
	White_Matter_Volume	Longitudinal	rs4800270	18	26844933	AQP4	t	g	111	1.197	-+	0.2312	0.536731
	White_Matter_Volume	Longitudinal	rs79668602	18	26845488	AQP4	a	g	111	1.903	++	0.05699	0.325375
	White_Matter_Volume	Longitudinal	rs12458416	18	26847267	AQP4	c	g	111	0.432	++	0.6655	0.81795
	White_Matter_Volume	Longitudinal	rs12953446	18	26848521	AQP4	a	g	111	0.592	++	0.5538	0.77419
	White_Matter_Volume	Longitudinal	rs67461489	18	26848876	AQP4	t	c	111	-0.792	--	0.4284	0.680748
	White_Matter_Volume	Longitudinal	rs11661081	18	26850068	AQP4	a	c	111	-0.924	+-	0.3554	0.624228
	White_Matter_Volume	Longitudinal	rs3763043	18	26855854	AQP4	t	c	111	-0.036	-+	0.9711	0.9711
	White_Matter_Volume	Longitudinal	rs68006382	18	26856555	AQP4	a	g	111	-0.581	+-	0.5613	0.776748
	White_Matter_Volume	Longitudinal	rs335930	18	26856961	AQP4	a	c	111	-0.632	--	0.5273	0.772623
	White_Matter_Volume	Longitudinal	rs71353405	18	26857429	AQP4	t	c	111	-0.051	-+	0.9597	0.970081
	White_Matter_Volume	Longitudinal	rs162009	18	26864250	AQP4	a	g	111	0.931	++	0.3516	0.624228
	White_Matter_Volume	Longitudinal	rs4800773	18	26865017	AQP4	a	g	111	-0.37	+-	0.7115	0.826064
	White_Matter_Volume	Longitudinal	rs3875089	18	26865469	AQP4	t	c	111	-0.789	+-	0.4302	0.680748
	White_Matter_Volume	Longitudinal	rs72878787	18	26866517	AQP4	a	g	111	0.94	-+	0.3474	0.624228
	White_Matter_Volume	Longitudinal	rs162006	18	26866570	AQP4	t	c	111	1.397	++	0.1625	0.483967
	White_Matter_Volume	Longitudinal	rs151244	18	26866755	AQP4	t	c	111	-1.708	--	0.08763	0.363797
	White_Matter_Volume	Longitudinal	rs72878794	18	26866839	AQP4	t	c	111	-1.066	+-	0.2866	0.577415
	White_Matter_Volume	Longitudinal	rs9961118	18	26866901	AQP4	t	c	111	-0.42	+-	0.6747	0.81795
	White_Matter_Volume	Longitudinal	rs162004	18	26867972	AQP4	c	g	111	0.371	-+	0.7106	0.826064
	White_Matter_Volume	Longitudinal	rs72878799	18	26868165	AQP4	a	g	111	-0.225	-+	0.8223	0.901241
	White_Matter_Volume	Longitudinal	rs11662318	18	26869056	AQP4	t	c	111	0.938	++	0.3482	0.624228
	White_Matter_Volume	Longitudinal	rs151246	18	26869139	AQP4	t	g	111	-0.254	-+	0.7995	0.8905
	White_Matter_Volume	Longitudinal	rs491148	18	26869803	AQP4	a	g	111	-0.959	+-	0.3375	0.624228
	White_Matter_Volume	Longitudinal	rs162002	18	26871015	AQP4	a	g	111	-1.437	--	0.1508	0.483967
	White_Matter_Volume	Longitudinal	rs162001	18	26871481	AQP4	a	c	111	1.054	++	0.292	0.579768
	White_Matter_Volume	Longitudinal	rs3865411	18	26871684	AQP4	a	g	111	-1.085	--	0.278	0.568448
	White_Matter_Volume	Longitudinal	rs162000	18	26872471	AQP4	a	c	111	-0.785	+-	0.4323	0.680748
	White_Matter_Volume	Longitudinal	rs12969503	18	26873564	AQP4	t	g	111	-0.738	--	0.4608	0.693732
	White_Matter_Volume	Longitudinal	rs8094228	18	26873767	AQP4	t	c	111	0.463	++	0.6436	0.81795
	White_Matter_Volume	Longitudinal	rs480647	18	26874290	AQP4	t	c	111	-2.287	--	0.02221	0.304277
	White_Matter_Volume	Longitudinal	rs10502478	18	26874616	AQP4	a	c	111	0.868	++	0.3854	0.668352
	White_Matter_Volume	Longitudinal	rs7234562	18	34483685	DTNA	t	c	111	-1.903	--	0.057	0.325375
	White_Matter_Volume	Longitudinal	rs79922046	18	34485536	DTNA	a	g	111	-1.329	--	0.1837	0.497767
	White_Matter_Volume	Longitudinal	rs9955950	18	34485672	DTNA	t	c	111	-0.083	-+	0.9336	0.968964
	White_Matter_Volume	Longitudinal	rs12957028	18	34485948	DTNA	a	g	111	1.173	-+	0.2406	0.536731
	White_Matter_Volume	Longitudinal	rs72639491	18	34491438	DTNA	a	g	111	-0.767	--	0.4433	0.682383
	White_Matter_Volume	Longitudinal	rs62097347	18	34492032	DTNA	c	g	111	-0.491	+-	0.6231	0.812997
	White_Matter_Volume	Longitudinal	rs9961251	18	34492344	DTNA	t	c	111	-1.108	+-	0.268	0.558794
	White_Matter_Volume	Longitudinal	rs111846993	18	34494001	DTNA	t	c	111	-0.824	--	0.4099	0.670811
	White_Matter_Volume	Longitudinal	rs4799769	18	34494577	DTNA	c	g	111	0.091	+-	0.9272	0.968964
	White_Matter_Volume	Longitudinal	rs8092794	18	34496273	DTNA	a	g	111	-0.45	--	0.6524	0.81795
	White_Matter_Volume	Longitudinal	rs7243528	18	34497055	DTNA	t	c	111	-0.692	--	0.4888	0.727887
	White_Matter_Volume	Longitudinal	rs79972565	18	34497194	DTNA	t	g	111	-1.465	--	0.1428	0.477161
	White_Matter_Volume	Longitudinal	rs35839923	18	34497764	DTNA	a	g	111	0.754	+-	0.451	0.686522
	White_Matter_Volume	Longitudinal	rs62097349	18	34499519	DTNA	a	g	111	1.561	++	0.1186	0.418377
	White_Matter_Volume	Longitudinal	rs9965622	18	34502153	DTNA	t	c	111	-1.286	--	0.1983	0.502986
	White_Matter_Volume	Longitudinal	rs62098462	18	34504364	DTNA	t	c	111	1.187	-+	0.2354	0.536731
	White_Matter_Volume	Longitudinal	rs75127284	18	34506592	DTNA	a	c	111	1.035	++	0.3008	0.588709
	White_Matter_Volume	Longitudinal	rs2439861	18	34507940	DTNA	a	g	111	-1.479	--	0.1392	0.47676
	White_Matter_Volume	Longitudinal	rs35982920	18	34516411	DTNA	a	g	111	-1.397	--	0.1624	0.483967
	White_Matter_Volume	Longitudinal	rs2509597	18	34528430	DTNA	a	t	111	-2.329	--	0.01984	0.304277
	White_Matter_Volume	Longitudinal	rs71363449	18	34531997	DTNA	t	c	111	1.368	+-	0.1712	0.491202
	White_Matter_Volume	Longitudinal	rs2439853	18	34533937	DTNA	a	g	111	2.082	++	0.0373	0.325375
	White_Matter_Volume	Longitudinal	rs2439000	18	34536414	DTNA	c	g	111	-1.168	--	0.2429	0.536731
	White_Matter_Volume	Longitudinal	rs11875892	18	34544032	DTNA	a	g	111	1.399	++	0.1619	0.483967
	White_Matter_Volume	Longitudinal	rs1967583	18	34544573	DTNA	t	c	111	-0.472	--	0.6372	0.81795
	White_Matter_Volume	Longitudinal	rs28856895	18	34555507	DTNA	a	g	111	1.882	++	0.05986	0.326647
	White_Matter_Volume	Longitudinal	rs77973497	18	34560529	DTNA	a	c	111	0.553	-+	0.5801	0.794737
	White_Matter_Volume	Longitudinal	rs2579796	18	34569243	DTNA	a	g	111	2.948	++	0.003194	0.0875156
	White_Matter_Volume	Longitudinal	rs2579797	18	34571732	DTNA	t	g	111	1.743	++	0.08132	0.359382
	White_Matter_Volume	Longitudinal	rs2685557	18	34576782	DTNA	t	c	111	2.948	++	0.003194	0.0875156
	White_Matter_Volume	Longitudinal	rs9958492	18	34577783	DTNA	t	c	111	1.91	+-	0.05608	0.325375
	White_Matter_Volume	Longitudinal	rs2579802	18	34579787	DTNA	a	c	111	1.023	-+	0.3062	0.590837
	White_Matter_Volume	Longitudinal	rs74920018	18	34607557	DTNA	a	t	111	0.245	-+	0.8062	0.890721
	White_Matter_Volume	Longitudinal	rs1439127	18	34607759	DTNA	a	t	111	1.192	-+	0.2332	0.536731
	White_Matter_Volume	Longitudinal	rs12327368	18	34611361	DTNA	a	g	111	1.91	+-	0.05608	0.325375
	White_Matter_Volume	Longitudinal	rs62097188	18	34611412	DTNA	a	g	111	1.726	++	0.08442	0.361423
	White_Matter_Volume	Longitudinal	rs9807153	18	34635520	DTNA	a	t	111	-0.436	-+	0.6629	0.81795
	White_Matter_Volume	Longitudinal	rs2730126	18	34635939	DTNA	a	c	111	2.291	++	0.02199	0.304277
	White_Matter_Volume	Longitudinal	rs1659526	18	34644451	DTNA	a	g	111	0.999	-+	0.3176	0.604322
	White_Matter_Volume	Longitudinal	rs17642885	18	34649976	DTNA	t	c	111	-1.273	+-	0.2029	0.502986
	White_Matter_Volume	Longitudinal	rs1240974	18	34650949	DTNA	t	c	111	1.858	-+	0.06314	0.326647
	White_Matter_Volume	Longitudinal	rs55869511	18	34651262	DTNA	a	c	111	-1.833	--	0.06676	0.326647
	White_Matter_Volume	Longitudinal	rs12955208	18	34656737	DTNA	a	g	111	-0.617	--	0.5375	0.772623
	White_Matter_Volume	Longitudinal	rs72953203	18	34660068	DTNA	a	g	111	-1.305	--	0.1917	0.502986
	White_Matter_Volume	Longitudinal	rs9946070	18	34665505	DTNA	a	g	111	3.196	++	0.001396	0.0875156
	White_Matter_Volume	Longitudinal	rs72953211	18	34673381	DTNA	a	c	111	-2.417	--	0.01564	0.304277
	White_Matter_Volume	Longitudinal	rs55971592	18	34697328	DTNA	a	g	111	-0.404	--	0.6866	0.81795
	White_Matter_Volume	Longitudinal	rs78837792	18	34703359	DTNA	t	c	111	1.915	++	0.05552	0.325375
	White_Matter_Volume	Longitudinal	rs11663468	18	34707936	DTNA	t	c	111	2.092	++	0.0364	0.325375
	White_Matter_Volume	Longitudinal	rs12963825	18	34709484	DTNA	a	g	111	1.415	+-	0.1571	0.483967
	White_Matter_Volume	Longitudinal	rs1480432	18	34727166	DTNA	t	g	111	2.447	++	0.0144	0.304277
	White_Matter_Volume	Longitudinal	rs45556134	18	34729425	DTNA	a	g	111	2.049	++	0.04048	0.325375
	White_Matter_Volume	Longitudinal	rs899828	18	34732688	DTNA	t	g	111	0.21	++	0.834	0.905494
	White_Matter_Volume	Longitudinal	rs17556884	18	34736455	DTNA	t	c	111	-1.776	-+	0.07569	0.345651
	White_Matter_Volume	Longitudinal	rs1480428	18	34738732	DTNA	a	g	111	-3.051	--	0.002279	0.0875156
	White_Matter_Volume	Longitudinal	rs12957349	18	34739291	DTNA	t	c	111	-0.617	--	0.5375	0.772623
	White_Matter_Volume	Longitudinal	rs12608110	18	34752198	DTNA	a	g	111	1.105	++	0.2692	0.558794
	White_Matter_Volume	Longitudinal	rs7228547	18	34760039	DTNA	a	g	111	-2.092	--	0.0364	0.325375
	White_Matter_Volume	Longitudinal	rs8099437	18	34761448	DTNA	t	g	111	-3.051	--	0.002279	0.0875156
	White_Matter_Volume	Longitudinal	rs72955132	18	34762382	DTNA	a	g	111	-1.776	-+	0.07569	0.345651
	White_Matter_Volume	Longitudinal	rs1817452	18	34776629	DTNA	t	c	111	-0.52	--	0.6033	0.810315
	White_Matter_Volume	Longitudinal	rs56404226	18	34778060	DTNA	a	g	111	-0.501	+-	0.6161	0.811593
	White_Matter_Volume	Longitudinal	rs72955175	18	34779045	DTNA	a	t	111	-2.096	--	0.03612	0.325375
	White_Matter_Volume	Longitudinal	rs12608251	18	34782906	DTNA	t	g	111	1.581	++	0.114	0.418377
	White_Matter_Volume	Longitudinal	rs76880720	18	34791141	DTNA	a	c	111	0.261	-+	0.7942	0.8905
	White_Matter_Volume	Longitudinal	rs9989533	18	34793909	DTNA	t	c	111	0.203	++	0.8394	0.905494
	White_Matter_Volume	Longitudinal	rs79500711	18	34794379	DTNA	a	g	111	-1.964	--	0.04953	0.325375
	White_Matter_Volume	Longitudinal	rs138856611	18	34801684	DTNA	t	g	111	0.435	++	0.6635	0.81795
	White_Matter_Volume	Longitudinal	rs62097226	18	34804223	DTNA	a	t	111	-0.382	-+	0.7027	0.826064
	White_Matter_Volume	Longitudinal	rs4458079	18	34806161	DTNA	t	c	111	-2.052	--	0.04013	0.325375
	White_Matter_Volume	Longitudinal	rs8086358	18	34813672	DTNA	t	g	111	2.018	++	0.04357	0.325375
	White_Matter_Volume	Longitudinal	rs72963047	18	34818804	DTNA	a	c	111	1.217	++	0.2237	0.536731
	White_Matter_Volume	Longitudinal	rs17557660	18	34831178	DTNA	a	t	111	-0.328	-+	0.7427	0.847916
	White_Matter_Volume	Longitudinal	rs1790533	18	34831631	DTNA	a	g	111	1.606	++	0.1084	0.412522
	White_Matter_Volume	Longitudinal	rs4799782	18	34841123	DTNA	a	g	111	-0.596	--	0.5513	0.77419
	White_Matter_Volume	Longitudinal	rs1786604	18	34846264	DTNA	a	g	111	-2.09	--	0.03662	0.325375
	White_Matter_Volume	Longitudinal	rs7233779	18	34863262	DTNA	a	g	111	1.84	++	0.0657	0.326647
	White_Matter_Volume	Longitudinal	rs644982	18	34869793	DTNA	a	g	111	1.678	++	0.09328	0.375864
	White_Matter_Volume	Longitudinal	rs11659517	18	34870978	DTNA	a	t	111	-0.046	+-	0.963	0.970081
	White_Matter_Volume	Longitudinal	rs524969	18	34872102	DTNA	a	t	111	-1.28	--	0.2005	0.502986
	White_Matter_Volume	Longitudinal	rs637914	18	34876135	DTNA	a	t	111	-1.266	--	0.2056	0.502986
	White_Matter_Volume	Longitudinal	rs9304141	18	34879143	DTNA	t	c	111	0.056	+-	0.9551	0.970081
	White_Matter_Volume	Longitudinal	rs2288085	18	34879740	DTNA	a	g	111	0.835	+-	0.4036	0.670811
	White_Matter_Volume	Longitudinal	rs17558116	18	34882719	DTNA	t	c	111	-0.168	-+	0.8669	0.927854
	White_Matter_Volume	Longitudinal	rs10502637	18	34890006	DTNA	t	c	111	-0.404	+-	0.6859	0.81795
	White_Matter_Volume	Longitudinal	rs149163416	18	34898841	DTNA	a	g	111	-0.346	-+	0.729	0.839269
	White_Matter_Volume	Longitudinal	20:33413780	20	33413780	SNTA1	a	t	111	-1.559	--	0.1191	0.418377
	White_Matter_Volume	Longitudinal	rs291683	20	33431611	SNTA1	t	c	111	-1.365	--	0.1721	0.491202
	White_Matter_Volume	Longitudinal	20:33433270	20	33433270	SNTA1	t	c	111	0.822	++	0.4113	0.670811
	White_Matter_Volume	Longitudinal	rs6141396	20	33436147	SNTA1	a	c	47	1.614	+?	0.1066	0.412522
	White_Matter_Volume	Longitudinal	rs293721	20	33441633	SNTA1	t	c	111	0.771	++	0.4406	0.682383

## Sheet: Table S8
Supplementary Table 8: Meta-Analysis of linear regression results in Aβ- participants (dominant genetic model)
	Outcome	Model	SNP	CHROM	POS	Gene_Symbol	Allele1	Allele2	Weight	Zscore	Direction	P	FDR_P
	Centiloid	Cross-Sectional	rs111599092	3	49465346	DAG1	a	g	353	0.221	+-	0.8251	0.997078
	Centiloid	Cross-Sectional	rs73073015	3	49465733	DAG1	a	g	353	0.129	-+	0.897	0.997078
	Centiloid	Cross-Sectional	rs7611164	3	49471395	DAG1	t	g	353	0.321	+-	0.7483	0.997078
	Centiloid	Cross-Sectional	rs1568661	3	49483525	DAG1	a	g	353	-0.985	--	0.3248	0.997078
	Centiloid	Cross-Sectional	rs7374731	3	49495661	DAG1	c	g	353	2.461	-+	0.01384	0.94804
	Centiloid	Cross-Sectional	rs73074811	3	49516098	DAG1	a	t	353	-1.053	--	0.2922	0.997078
	Centiloid	Cross-Sectional	rs3870338	3	49519618	DAG1	a	g	353	-0.985	--	0.3248	0.997078
	Centiloid	Cross-Sectional	rs55935606	3	49528072	DAG1	a	g	353	-1.933	+-	0.05325	0.997078
	Centiloid	Cross-Sectional	rs75153130	3	49530436	DAG1	a	c	353	-0.321	-+	0.7483	0.997078
	Centiloid	Cross-Sectional	rs13079082	3	49537375	DAG1	c	g	353	1.29	++	0.197	0.997078
	Centiloid	Cross-Sectional	rs4052546	3	49538116	DAG1	c	g	353	-2.461	+-	0.01384	0.94804
	Centiloid	Cross-Sectional	rs73074830	3	49539584	DAG1	a	c	353	0.297	++	0.7663	0.997078
	Centiloid	Cross-Sectional	rs114093899	3	49539955	DAG1	c	g	353	-0.761	--	0.4465	0.997078
	Centiloid	Cross-Sectional	rs9789109	18	26842291	AQP4	a	g	353	-0.385	-+	0.7005	0.997078
	Centiloid	Cross-Sectional	rs10164026	18	26842362	AQP4	a	c	353	0.35	++	0.7263	0.997078
	Centiloid	Cross-Sectional	rs4800270	18	26844933	AQP4	t	g	353	-0.123	+-	0.9018	0.997078
	Centiloid	Cross-Sectional	rs79668602	18	26845488	AQP4	a	g	353	0.136	-+	0.8921	0.997078
	Centiloid	Cross-Sectional	rs12458416	18	26847267	AQP4	c	g	353	0.212	-+	0.8317	0.997078
	Centiloid	Cross-Sectional	rs12953446	18	26848521	AQP4	a	g	353	-0.825	+-	0.4096	0.997078
	Centiloid	Cross-Sectional	rs67461489	18	26848876	AQP4	t	c	353	0.149	+-	0.8814	0.997078
	Centiloid	Cross-Sectional	rs11661081	18	26850068	AQP4	a	c	353	-0.278	--	0.7808	0.997078
	Centiloid	Cross-Sectional	rs3763043	18	26855854	AQP4	t	c	353	-0.612	--	0.5405	0.997078
	Centiloid	Cross-Sectional	rs68006382	18	26856555	AQP4	a	g	353	0.261	++	0.7943	0.997078
	Centiloid	Cross-Sectional	rs335930	18	26856961	AQP4	a	c	353	1.119	++	0.263	0.997078
	Centiloid	Cross-Sectional	rs71353405	18	26857429	AQP4	t	c	353	0.003	+-	0.9973	0.9973
	Centiloid	Cross-Sectional	rs162009	18	26864250	AQP4	a	g	353	-0.526	+-	0.5992	0.997078
	Centiloid	Cross-Sectional	rs4800773	18	26865017	AQP4	a	g	353	-0.77	--	0.4414	0.997078
	Centiloid	Cross-Sectional	rs3875089	18	26865469	AQP4	t	c	353	0.48	++	0.6314	0.997078
	Centiloid	Cross-Sectional	rs72878787	18	26866517	AQP4	a	g	353	0.921	++	0.3571	0.997078
	Centiloid	Cross-Sectional	rs162006	18	26866570	AQP4	t	c	353	-0.106	+-	0.9159	0.997078
	Centiloid	Cross-Sectional	rs151244	18	26866755	AQP4	t	c	353	0.291	-+	0.7711	0.997078
	Centiloid	Cross-Sectional	rs72878794	18	26866839	AQP4	t	c	353	-0.469	-+	0.6394	0.997078
	Centiloid	Cross-Sectional	rs9961118	18	26866901	AQP4	t	c	353	1.544	++	0.1227	0.997078
	Centiloid	Cross-Sectional	rs162004	18	26867972	AQP4	c	g	353	0.539	+-	0.5897	0.997078
	Centiloid	Cross-Sectional	rs72878799	18	26868165	AQP4	a	g	353	0.439	+-	0.6606	0.997078
	Centiloid	Cross-Sectional	rs11662318	18	26869056	AQP4	t	c	353	1.002	++	0.3164	0.997078
	Centiloid	Cross-Sectional	rs151246	18	26869139	AQP4	t	g	353	-0.211	+-	0.8326	0.997078
	Centiloid	Cross-Sectional	rs491148	18	26869803	AQP4	a	g	353	-0.606	--	0.5445	0.997078
	Centiloid	Cross-Sectional	rs162002	18	26871015	AQP4	a	g	353	-0.842	-+	0.3997	0.997078
	Centiloid	Cross-Sectional	rs162001	18	26871481	AQP4	a	c	353	0.79	+-	0.4294	0.997078
	Centiloid	Cross-Sectional	rs3865411	18	26871684	AQP4	a	g	353	-0.952	--	0.3409	0.997078
	Centiloid	Cross-Sectional	rs162000	18	26872471	AQP4	a	c	353	-0.331	--	0.7405	0.997078
	Centiloid	Cross-Sectional	rs12969503	18	26873564	AQP4	t	g	353	-0.11	-+	0.9126	0.997078
	Centiloid	Cross-Sectional	rs8094228	18	26873767	AQP4	t	c	353	-0.236	+-	0.8137	0.997078
	Centiloid	Cross-Sectional	rs480647	18	26874290	AQP4	t	c	353	-0.227	+-	0.8206	0.997078
	Centiloid	Cross-Sectional	rs10502478	18	26874616	AQP4	a	c	353	-0.321	+-	0.7484	0.997078
	Centiloid	Cross-Sectional	rs7234562	18	34483685	DTNA	t	c	353	0.029	-+	0.9772	0.997078
	Centiloid	Cross-Sectional	rs79922046	18	34485536	DTNA	a	g	353	0.554	++	0.5797	0.997078
	Centiloid	Cross-Sectional	rs9955950	18	34485672	DTNA	t	c	353	1.128	-+	0.2594	0.997078
	Centiloid	Cross-Sectional	rs12957028	18	34485948	DTNA	a	g	353	0.093	++	0.926	0.997078
	Centiloid	Cross-Sectional	rs72639491	18	34491438	DTNA	a	g	353	-1.004	-+	0.3154	0.997078
	Centiloid	Cross-Sectional	rs62097347	18	34492032	DTNA	c	g	353	-0.204	+-	0.8382	0.997078
	Centiloid	Cross-Sectional	rs9961251	18	34492344	DTNA	t	c	353	-0.145	+-	0.8844	0.997078
	Centiloid	Cross-Sectional	rs111846993	18	34494001	DTNA	t	c	353	-0.653	--	0.5136	0.997078
	Centiloid	Cross-Sectional	rs4799769	18	34494577	DTNA	c	g	353	0.99	++	0.322	0.997078
	Centiloid	Cross-Sectional	rs8092794	18	34496273	DTNA	a	g	353	0.179	-+	0.8578	0.997078
	Centiloid	Cross-Sectional	rs7243528	18	34497055	DTNA	t	c	353	0.082	+-	0.9344	0.997078
	Centiloid	Cross-Sectional	rs79972565	18	34497194	DTNA	t	g	353	0.311	-+	0.7557	0.997078
	Centiloid	Cross-Sectional	rs35839923	18	34497764	DTNA	a	g	353	1.24	++	0.215	0.997078
	Centiloid	Cross-Sectional	rs62097349	18	34499519	DTNA	a	g	353	-0.409	--	0.6828	0.997078
	Centiloid	Cross-Sectional	rs9965622	18	34502153	DTNA	t	c	353	0.438	-+	0.6617	0.997078
	Centiloid	Cross-Sectional	rs62098462	18	34504364	DTNA	t	c	353	-1.125	--	0.2608	0.997078
	Centiloid	Cross-Sectional	rs75127284	18	34506592	DTNA	a	c	353	-0.923	--	0.3562	0.997078
	Centiloid	Cross-Sectional	rs2439861	18	34507940	DTNA	a	g	353	-0.038	+-	0.9697	0.997078
	Centiloid	Cross-Sectional	rs35982920	18	34516411	DTNA	a	g	353	-0.539	-+	0.5902	0.997078
	Centiloid	Cross-Sectional	rs2509597	18	34528430	DTNA	a	t	353	0.272	+-	0.7853	0.997078
	Centiloid	Cross-Sectional	rs71363449	18	34531997	DTNA	t	c	353	0.872	++	0.3834	0.997078
	Centiloid	Cross-Sectional	rs2439853	18	34533937	DTNA	a	g	353	1.222	++	0.2219	0.997078
	Centiloid	Cross-Sectional	rs2439000	18	34536414	DTNA	c	g	353	-0.646	+-	0.5181	0.997078
	Centiloid	Cross-Sectional	rs11875892	18	34544032	DTNA	a	g	353	0.023	-+	0.9817	0.997078
	Centiloid	Cross-Sectional	rs1967583	18	34544573	DTNA	t	c	353	1.696	++	0.08979	0.997078
	Centiloid	Cross-Sectional	rs28856895	18	34555507	DTNA	a	g	353	0.951	++	0.3415	0.997078
	Centiloid	Cross-Sectional	rs77973497	18	34560529	DTNA	a	c	353	-1.821	--	0.06858	0.997078
	Centiloid	Cross-Sectional	rs2579796	18	34569243	DTNA	a	g	353	1.424	++	0.1545	0.997078
	Centiloid	Cross-Sectional	rs2579797	18	34571732	DTNA	t	g	353	0.713	-+	0.476	0.997078
	Centiloid	Cross-Sectional	rs2685557	18	34576782	DTNA	t	c	353	1.401	++	0.1613	0.997078
	Centiloid	Cross-Sectional	rs9958492	18	34577783	DTNA	t	c	353	0.82	++	0.4121	0.997078
	Centiloid	Cross-Sectional	rs2579802	18	34579787	DTNA	a	c	353	0.123	-+	0.9017	0.997078
	Centiloid	Cross-Sectional	rs74920018	18	34607557	DTNA	a	t	353	-1.645	--	0.09988	0.997078
	Centiloid	Cross-Sectional	rs1439127	18	34607759	DTNA	a	t	353	0.178	-+	0.8583	0.997078
	Centiloid	Cross-Sectional	rs12327368	18	34611361	DTNA	a	g	353	0.849	++	0.396	0.997078
	Centiloid	Cross-Sectional	rs62097188	18	34611412	DTNA	a	g	353	0.729	-+	0.4662	0.997078
	Centiloid	Cross-Sectional	rs9807153	18	34635520	DTNA	a	t	353	-0.368	-+	0.7128	0.997078
	Centiloid	Cross-Sectional	rs2730126	18	34635939	DTNA	a	c	353	0.601	++	0.5479	0.997078
	Centiloid	Cross-Sectional	rs1659526	18	34644451	DTNA	a	g	353	0.016	-+	0.9875	0.997078
	Centiloid	Cross-Sectional	rs17642885	18	34649976	DTNA	t	c	353	0.814	++	0.4157	0.997078
	Centiloid	Cross-Sectional	rs1240974	18	34650949	DTNA	t	c	353	0.213	-+	0.8313	0.997078
	Centiloid	Cross-Sectional	rs55869511	18	34651262	DTNA	a	c	353	-0.043	+-	0.9655	0.997078
	Centiloid	Cross-Sectional	rs12955208	18	34656737	DTNA	a	g	353	-0.444	+-	0.6572	0.997078
	Centiloid	Cross-Sectional	rs72953203	18	34660068	DTNA	a	g	353	-0.182	--	0.8552	0.997078
	Centiloid	Cross-Sectional	rs9946070	18	34665505	DTNA	a	g	353	0.985	++	0.3244	0.997078
	Centiloid	Cross-Sectional	rs72953211	18	34673381	DTNA	a	c	353	-0.013	+-	0.9898	0.997078
	Centiloid	Cross-Sectional	rs55971592	18	34697328	DTNA	a	g	353	-0.149	+-	0.8819	0.997078
	Centiloid	Cross-Sectional	rs78837792	18	34703359	DTNA	t	c	353	-0.48	-+	0.6315	0.997078
	Centiloid	Cross-Sectional	rs11663468	18	34707936	DTNA	t	c	353	-0.642	-+	0.5208	0.997078
	Centiloid	Cross-Sectional	rs12963825	18	34709484	DTNA	a	g	353	0.585	++	0.5585	0.997078
	Centiloid	Cross-Sectional	rs1480432	18	34727166	DTNA	t	g	353	-0.035	+-	0.9719	0.997078
	Centiloid	Cross-Sectional	rs45556134	18	34729425	DTNA	a	g	353	1.417	-+	0.1566	0.997078
	Centiloid	Cross-Sectional	rs899828	18	34732688	DTNA	t	g	353	0.917	++	0.3591	0.997078
	Centiloid	Cross-Sectional	rs17556884	18	34736455	DTNA	t	c	353	-0.569	+-	0.5693	0.997078
	Centiloid	Cross-Sectional	rs1480428	18	34738732	DTNA	a	g	353	-0.367	+-	0.7138	0.997078
	Centiloid	Cross-Sectional	rs12957349	18	34739291	DTNA	t	c	353	0.104	+-	0.9173	0.997078
	Centiloid	Cross-Sectional	rs12608110	18	34752198	DTNA	a	g	353	2.016	++	0.04382	0.997078
	Centiloid	Cross-Sectional	rs7228547	18	34760039	DTNA	a	g	353	0.603	+-	0.5468	0.997078
	Centiloid	Cross-Sectional	rs8099437	18	34761448	DTNA	t	g	353	-0.447	+-	0.6549	0.997078
	Centiloid	Cross-Sectional	rs72955132	18	34762382	DTNA	a	g	353	-0.696	--	0.4863	0.997078
	Centiloid	Cross-Sectional	rs1817452	18	34776629	DTNA	t	c	353	-0.108	+-	0.9142	0.997078
	Centiloid	Cross-Sectional	rs56404226	18	34778060	DTNA	a	g	353	-2.009	--	0.04449	0.997078
	Centiloid	Cross-Sectional	rs72955175	18	34779045	DTNA	a	t	353	-0.456	--	0.6481	0.997078
	Centiloid	Cross-Sectional	rs12608251	18	34782906	DTNA	t	g	353	0.041	+-	0.9675	0.997078
	Centiloid	Cross-Sectional	rs76880720	18	34791141	DTNA	a	c	353	0.269	-+	0.7878	0.997078
	Centiloid	Cross-Sectional	rs9989533	18	34793909	DTNA	t	c	353	0.188	-+	0.8507	0.997078
	Centiloid	Cross-Sectional	rs79500711	18	34794379	DTNA	a	g	353	1.262	++	0.2069	0.997078
	Centiloid	Cross-Sectional	rs138856611	18	34801684	DTNA	t	g	353	1.962	++	0.04977	0.997078
	Centiloid	Cross-Sectional	rs62097226	18	34804223	DTNA	a	t	353	0.563	++	0.5732	0.997078
	Centiloid	Cross-Sectional	rs4458079	18	34806161	DTNA	t	c	353	0.447	++	0.6552	0.997078
	Centiloid	Cross-Sectional	rs8086358	18	34813672	DTNA	t	g	353	-0.107	-+	0.915	0.997078
	Centiloid	Cross-Sectional	rs72963047	18	34818804	DTNA	a	c	353	0.139	-+	0.8893	0.997078
	Centiloid	Cross-Sectional	rs17557660	18	34831178	DTNA	a	t	353	1.221	-+	0.2221	0.997078
	Centiloid	Cross-Sectional	rs1790533	18	34831631	DTNA	a	g	353	-0.161	+-	0.8721	0.997078
	Centiloid	Cross-Sectional	rs4799782	18	34841123	DTNA	a	g	353	-2.048	--	0.04057	0.997078
	Centiloid	Cross-Sectional	rs1786604	18	34846264	DTNA	a	g	353	-0.454	--	0.6499	0.997078
	Centiloid	Cross-Sectional	rs7233779	18	34863262	DTNA	a	g	353	-1.626	--	0.1039	0.997078
	Centiloid	Cross-Sectional	rs644982	18	34869793	DTNA	a	g	353	-0.586	--	0.5579	0.997078
	Centiloid	Cross-Sectional	rs11659517	18	34870978	DTNA	a	t	353	-0.601	+-	0.5481	0.997078
	Centiloid	Cross-Sectional	rs524969	18	34872102	DTNA	a	t	353	1.035	-+	0.3004	0.997078
	Centiloid	Cross-Sectional	rs637914	18	34876135	DTNA	a	t	353	1.852	++	0.06398	0.997078
	Centiloid	Cross-Sectional	rs9304141	18	34879143	DTNA	t	c	353	0.049	-+	0.9609	0.997078
	Centiloid	Cross-Sectional	rs2288085	18	34879740	DTNA	a	g	353	-0.36	+-	0.7185	0.997078
	Centiloid	Cross-Sectional	rs17558116	18	34882719	DTNA	t	c	353	-0.786	--	0.4318	0.997078
	Centiloid	Cross-Sectional	rs10502637	18	34890006	DTNA	t	c	353	-0.999	--	0.3178	0.997078
	Centiloid	Cross-Sectional	rs149163416	18	34898841	DTNA	a	g	353	-0.931	--	0.3518	0.997078
	Centiloid	Cross-Sectional	20:33413780	20	33413780	SNTA1	a	t	353	0.189	+-	0.8505	0.997078
	Centiloid	Cross-Sectional	rs291683	20	33431611	SNTA1	t	c	353	-0.425	--	0.6712	0.997078
	Centiloid	Cross-Sectional	20:33433270	20	33433270	SNTA1	t	c	353	0.723	++	0.4697	0.997078
	Centiloid	Cross-Sectional	rs6141396	20	33436147	SNTA1	a	c	107	0.948	+?	0.3433	0.997078
	Centiloid	Cross-Sectional	rs293721	20	33441633	SNTA1	t	c	353	1.279	++	0.2008	0.997078
	Centiloid	Longitudinal	rs111599092	3	49465346	DAG1	a	g	352	0.872	++	0.3835	0.78109
	Centiloid	Longitudinal	rs73073015	3	49465733	DAG1	a	g	352	0.079	+-	0.9374	0.983128
	Centiloid	Longitudinal	rs7611164	3	49471395	DAG1	t	g	352	0.833	+-	0.4051	0.78109
	Centiloid	Longitudinal	rs1568661	3	49483525	DAG1	a	g	352	0.498	+-	0.6185	0.936116
	Centiloid	Longitudinal	rs7374731	3	49495661	DAG1	c	g	352	-1.214	--	0.2248	0.78109
	Centiloid	Longitudinal	rs73074811	3	49516098	DAG1	a	t	352	-0.829	--	0.4071	0.78109
	Centiloid	Longitudinal	rs3870338	3	49519618	DAG1	a	g	352	0.498	+-	0.6185	0.936116
	Centiloid	Longitudinal	rs55935606	3	49528072	DAG1	a	g	352	0.89	++	0.3735	0.78109
	Centiloid	Longitudinal	rs75153130	3	49530436	DAG1	a	c	352	-0.833	-+	0.4051	0.78109
	Centiloid	Longitudinal	rs13079082	3	49537375	DAG1	c	g	352	0.609	-+	0.5427	0.930585
	Centiloid	Longitudinal	rs4052546	3	49538116	DAG1	c	g	352	1.214	++	0.2248	0.78109
	Centiloid	Longitudinal	rs73074830	3	49539584	DAG1	a	c	352	-0.239	-+	0.8114	0.96544
	Centiloid	Longitudinal	rs114093899	3	49539955	DAG1	c	g	352	1.179	++	0.2383	0.78109
	Centiloid	Longitudinal	rs9789109	18	26842291	AQP4	a	g	352	1.307	++	0.1912	0.78109
	Centiloid	Longitudinal	rs10164026	18	26842362	AQP4	a	c	352	-0.602	+-	0.547	0.930585
	Centiloid	Longitudinal	rs4800270	18	26844933	AQP4	t	g	352	0.02	-+	0.9841	0.991336
	Centiloid	Longitudinal	rs79668602	18	26845488	AQP4	a	g	352	1.057	++	0.2907	0.78109
	Centiloid	Longitudinal	rs12458416	18	26847267	AQP4	c	g	352	0.371	++	0.7109	0.96544
	Centiloid	Longitudinal	rs12953446	18	26848521	AQP4	a	g	352	-1.675	--	0.09389	0.756643
	Centiloid	Longitudinal	rs67461489	18	26848876	AQP4	t	c	352	3.215	++	0.001305	0.178785
	Centiloid	Longitudinal	rs11661081	18	26850068	AQP4	a	c	352	-2.104	--	0.03538	0.692437
	Centiloid	Longitudinal	rs3763043	18	26855854	AQP4	t	c	352	1.338	++	0.1809	0.78109
	Centiloid	Longitudinal	rs68006382	18	26856555	AQP4	a	g	352	-1.804	--	0.07124	0.741535
	Centiloid	Longitudinal	rs335930	18	26856961	AQP4	a	c	352	-0.053	-+	0.9574	0.983128
	Centiloid	Longitudinal	rs71353405	18	26857429	AQP4	t	c	352	-2.739	--	0.006169	0.422577
	Centiloid	Longitudinal	rs162009	18	26864250	AQP4	a	g	352	-2.004	--	0.04506	0.741535
	Centiloid	Longitudinal	rs4800773	18	26865017	AQP4	a	g	352	-0.958	--	0.3383	0.78109
	Centiloid	Longitudinal	rs3875089	18	26865469	AQP4	t	c	352	2.305	++	0.02116	0.512608
	Centiloid	Longitudinal	rs72878787	18	26866517	AQP4	a	g	352	1.336	++	0.1815	0.78109
	Centiloid	Longitudinal	rs162006	18	26866570	AQP4	t	c	352	0.461	-+	0.6446	0.93947
	Centiloid	Longitudinal	rs151244	18	26866755	AQP4	t	c	352	-1.056	+-	0.2908	0.78109
	Centiloid	Longitudinal	rs72878794	18	26866839	AQP4	t	c	352	0.18	+-	0.8572	0.968208
	Centiloid	Longitudinal	rs9961118	18	26866901	AQP4	t	c	352	-0.353	-+	0.7241	0.96544
	Centiloid	Longitudinal	rs162004	18	26867972	AQP4	c	g	352	-0.773	--	0.4394	0.816261
	Centiloid	Longitudinal	rs72878799	18	26868165	AQP4	a	g	352	-1.16	--	0.2459	0.78109
	Centiloid	Longitudinal	rs11662318	18	26869056	AQP4	t	c	352	-2.364	--	0.01806	0.512608
	Centiloid	Longitudinal	rs151246	18	26869139	AQP4	t	g	352	0.903	++	0.3663	0.78109
	Centiloid	Longitudinal	rs491148	18	26869803	AQP4	a	g	352	1.595	++	0.1107	0.78109
	Centiloid	Longitudinal	rs162002	18	26871015	AQP4	a	g	352	1.001	++	0.3168	0.78109
	Centiloid	Longitudinal	rs162001	18	26871481	AQP4	a	c	352	-0.859	--	0.3901	0.78109
	Centiloid	Longitudinal	rs3865411	18	26871684	AQP4	a	g	352	0.493	-+	0.6218	0.936116
	Centiloid	Longitudinal	rs162000	18	26872471	AQP4	a	c	352	-0.058	+-	0.9536	0.983128
	Centiloid	Longitudinal	rs12969503	18	26873564	AQP4	t	g	352	-0.048	+-	0.9616	0.983128
	Centiloid	Longitudinal	rs8094228	18	26873767	AQP4	t	c	352	-0.854	-+	0.3932	0.78109
	Centiloid	Longitudinal	rs480647	18	26874290	AQP4	t	c	352	-0.95	+-	0.3421	0.78109
	Centiloid	Longitudinal	rs10502478	18	26874616	AQP4	a	c	352	-1.334	+-	0.1823	0.78109
	Centiloid	Longitudinal	rs7234562	18	34483685	DTNA	t	c	352	-0.399	-+	0.6897	0.96544
	Centiloid	Longitudinal	rs79922046	18	34485536	DTNA	a	g	352	-0.771	--	0.4409	0.816261
	Centiloid	Longitudinal	rs9955950	18	34485672	DTNA	t	c	352	0.386	++	0.6995	0.96544
	Centiloid	Longitudinal	rs12957028	18	34485948	DTNA	a	g	352	0.526	+-	0.5992	0.936116
	Centiloid	Longitudinal	rs72639491	18	34491438	DTNA	a	g	352	0.163	++	0.8706	0.969693
	Centiloid	Longitudinal	rs62097347	18	34492032	DTNA	c	g	352	-0.972	--	0.3309	0.78109
	Centiloid	Longitudinal	rs9961251	18	34492344	DTNA	t	c	352	-1.279	--	0.2009	0.78109
	Centiloid	Longitudinal	rs111846993	18	34494001	DTNA	t	c	352	-0.466	--	0.641	0.93947
	Centiloid	Longitudinal	rs4799769	18	34494577	DTNA	c	g	352	-0.285	--	0.7754	0.96544
	Centiloid	Longitudinal	rs8092794	18	34496273	DTNA	a	g	352	-0.128	-+	0.8984	0.983128
	Centiloid	Longitudinal	rs7243528	18	34497055	DTNA	t	c	352	1.184	++	0.2363	0.78109
	Centiloid	Longitudinal	rs79972565	18	34497194	DTNA	t	g	352	1.165	++	0.2441	0.78109
	Centiloid	Longitudinal	rs35839923	18	34497764	DTNA	a	g	352	-1.683	--	0.09239	0.756643
	Centiloid	Longitudinal	rs62097349	18	34499519	DTNA	a	g	352	-1.109	--	0.2673	0.78109
	Centiloid	Longitudinal	rs9965622	18	34502153	DTNA	t	c	352	1.373	-+	0.1697	0.78109
	Centiloid	Longitudinal	rs62098462	18	34504364	DTNA	t	c	352	0.174	-+	0.8622	0.968208
	Centiloid	Longitudinal	rs75127284	18	34506592	DTNA	a	c	352	-1.198	--	0.2309	0.78109
	Centiloid	Longitudinal	rs2439861	18	34507940	DTNA	a	g	352	0.935	++	0.3499	0.78109
	Centiloid	Longitudinal	rs35982920	18	34516411	DTNA	a	g	352	2.283	++	0.02245	0.512608
	Centiloid	Longitudinal	rs2509597	18	34528430	DTNA	a	t	352	1.744	++	0.08119	0.741535
	Centiloid	Longitudinal	rs71363449	18	34531997	DTNA	t	c	352	-0.176	-+	0.8603	0.968208
	Centiloid	Longitudinal	rs2439853	18	34533937	DTNA	a	g	352	-0.967	--	0.3338	0.78109
	Centiloid	Longitudinal	rs2439000	18	34536414	DTNA	c	g	352	1.215	++	0.2244	0.78109
	Centiloid	Longitudinal	rs11875892	18	34544032	DTNA	a	g	352	1.817	++	0.06925	0.741535
	Centiloid	Longitudinal	rs1967583	18	34544573	DTNA	t	c	352	-1.134	--	0.2568	0.78109
	Centiloid	Longitudinal	rs28856895	18	34555507	DTNA	a	g	352	-0.049	-+	0.9611	0.983128
	Centiloid	Longitudinal	rs77973497	18	34560529	DTNA	a	c	352	1.798	++	0.07217	0.741535
	Centiloid	Longitudinal	rs2579796	18	34569243	DTNA	a	g	352	-0.987	--	0.3236	0.78109
	Centiloid	Longitudinal	rs2579797	18	34571732	DTNA	t	g	352	-1.147	--	0.2513	0.78109
	Centiloid	Longitudinal	rs2685557	18	34576782	DTNA	t	c	352	-1.099	--	0.2717	0.78109
	Centiloid	Longitudinal	rs9958492	18	34577783	DTNA	t	c	352	-0.287	-+	0.7745	0.96544
	Centiloid	Longitudinal	rs2579802	18	34579787	DTNA	a	c	352	-0.598	--	0.5502	0.930585
	Centiloid	Longitudinal	rs74920018	18	34607557	DTNA	a	t	352	1.896	++	0.05795	0.741535
	Centiloid	Longitudinal	rs1439127	18	34607759	DTNA	a	t	352	-0.003	+-	0.9975	0.9975
	Centiloid	Longitudinal	rs12327368	18	34611361	DTNA	a	g	352	-0.128	-+	0.8982	0.983128
	Centiloid	Longitudinal	rs62097188	18	34611412	DTNA	a	g	352	0.969	++	0.3323	0.78109
	Centiloid	Longitudinal	rs9807153	18	34635520	DTNA	a	t	352	0.281	+-	0.7789	0.96544
	Centiloid	Longitudinal	rs2730126	18	34635939	DTNA	a	c	352	-0.519	-+	0.6041	0.936116
	Centiloid	Longitudinal	rs1659526	18	34644451	DTNA	a	g	352	0.093	++	0.9258	0.983128
	Centiloid	Longitudinal	rs17642885	18	34649976	DTNA	t	c	352	-0.231	-+	0.8171	0.96544
	Centiloid	Longitudinal	rs1240974	18	34650949	DTNA	t	c	352	-0.98	+-	0.3272	0.78109
	Centiloid	Longitudinal	rs55869511	18	34651262	DTNA	a	c	352	0.2	-+	0.8419	0.968208
	Centiloid	Longitudinal	rs12955208	18	34656737	DTNA	a	g	352	1.055	++	0.2915	0.78109
	Centiloid	Longitudinal	rs72953203	18	34660068	DTNA	a	g	352	-0.521	-+	0.6023	0.936116
	Centiloid	Longitudinal	rs9946070	18	34665505	DTNA	a	g	352	-0.303	+-	0.7616	0.96544
	Centiloid	Longitudinal	rs72953211	18	34673381	DTNA	a	c	352	0.194	-+	0.8465	0.968208
	Centiloid	Longitudinal	rs55971592	18	34697328	DTNA	a	g	352	0.297	-+	0.7667	0.96544
	Centiloid	Longitudinal	rs78837792	18	34703359	DTNA	t	c	352	0.03	+-	0.9758	0.990256
	Centiloid	Longitudinal	rs11663468	18	34707936	DTNA	t	c	352	-1.021	+-	0.3073	0.78109
	Centiloid	Longitudinal	rs12963825	18	34709484	DTNA	a	g	352	-1.88	--	0.06017	0.741535
	Centiloid	Longitudinal	rs1480432	18	34727166	DTNA	t	g	352	-0.504	+-	0.6141	0.936116
	Centiloid	Longitudinal	rs45556134	18	34729425	DTNA	a	g	352	1.315	++	0.1886	0.78109
	Centiloid	Longitudinal	rs899828	18	34732688	DTNA	t	g	352	-2.318	--	0.02045	0.512608
	Centiloid	Longitudinal	rs17556884	18	34736455	DTNA	t	c	352	1.134	++	0.2569	0.78109
	Centiloid	Longitudinal	rs1480428	18	34738732	DTNA	a	g	352	1.537	-+	0.1244	0.78109
	Centiloid	Longitudinal	rs12957349	18	34739291	DTNA	t	c	352	0.962	++	0.3361	0.78109
	Centiloid	Longitudinal	rs12608110	18	34752198	DTNA	a	g	352	0.226	+-	0.8213	0.96544
	Centiloid	Longitudinal	rs7228547	18	34760039	DTNA	a	g	352	0.557	-+	0.5775	0.936116
	Centiloid	Longitudinal	rs8099437	18	34761448	DTNA	t	g	352	1.416	-+	0.1568	0.78109
	Centiloid	Longitudinal	rs72955132	18	34762382	DTNA	a	g	352	1.204	++	0.2285	0.78109
	Centiloid	Longitudinal	rs1817452	18	34776629	DTNA	t	c	352	1.262	++	0.207	0.78109
	Centiloid	Longitudinal	rs56404226	18	34778060	DTNA	a	g	352	0.105	-+	0.9166	0.983128
	Centiloid	Longitudinal	rs72955175	18	34779045	DTNA	a	t	352	1.003	-+	0.3158	0.78109
	Centiloid	Longitudinal	rs12608251	18	34782906	DTNA	t	g	352	0.368	+-	0.7129	0.96544
	Centiloid	Longitudinal	rs76880720	18	34791141	DTNA	a	c	352	-0.891	--	0.3727	0.78109
	Centiloid	Longitudinal	rs9989533	18	34793909	DTNA	t	c	352	-0.903	--	0.3667	0.78109
	Centiloid	Longitudinal	rs79500711	18	34794379	DTNA	a	g	352	-0.257	-+	0.7971	0.96544
	Centiloid	Longitudinal	rs138856611	18	34801684	DTNA	t	g	352	-0.239	+-	0.8109	0.96544
	Centiloid	Longitudinal	rs62097226	18	34804223	DTNA	a	t	352	-0.823	+-	0.4105	0.78109
	Centiloid	Longitudinal	rs4458079	18	34806161	DTNA	t	c	352	-0.603	-+	0.5465	0.930585
	Centiloid	Longitudinal	rs8086358	18	34813672	DTNA	t	g	352	-0.905	+-	0.3657	0.78109
	Centiloid	Longitudinal	rs72963047	18	34818804	DTNA	a	c	352	-0.3	+-	0.7644	0.96544
	Centiloid	Longitudinal	rs17557660	18	34831178	DTNA	a	t	352	-1.774	+-	0.07601	0.741535
	Centiloid	Longitudinal	rs1790533	18	34831631	DTNA	a	g	352	0.077	+-	0.9389	0.983128
	Centiloid	Longitudinal	rs4799782	18	34841123	DTNA	a	g	352	-0.294	-+	0.7689	0.96544
	Centiloid	Longitudinal	rs1786604	18	34846264	DTNA	a	g	352	1.031	-+	0.3025	0.78109
	Centiloid	Longitudinal	rs7233779	18	34863262	DTNA	a	g	352	-0.702	+-	0.483	0.88228
	Centiloid	Longitudinal	rs644982	18	34869793	DTNA	a	g	352	0.352	+-	0.7246	0.96544
	Centiloid	Longitudinal	rs11659517	18	34870978	DTNA	a	t	352	0.284	+-	0.7767	0.96544
	Centiloid	Longitudinal	rs524969	18	34872102	DTNA	a	t	352	-0.531	--	0.5951	0.936116
	Centiloid	Longitudinal	rs637914	18	34876135	DTNA	a	t	352	-0.674	--	0.5004	0.902037
	Centiloid	Longitudinal	rs9304141	18	34879143	DTNA	t	c	352	0.614	++	0.5394	0.930585
	Centiloid	Longitudinal	rs2288085	18	34879740	DTNA	a	g	352	0.292	++	0.7701	0.96544
	Centiloid	Longitudinal	rs17558116	18	34882719	DTNA	t	c	352	0.564	++	0.573	0.936116
	Centiloid	Longitudinal	rs10502637	18	34890006	DTNA	t	c	352	-0.479	+-	0.6322	0.93947
	Centiloid	Longitudinal	rs149163416	18	34898841	DTNA	a	g	352	-0.085	+-	0.9326	0.983128
	Centiloid	Longitudinal	20:33413780	20	33413780	SNTA1	a	t	352	-0.222	-+	0.8245	0.96544
	Centiloid	Longitudinal	rs291683	20	33431611	SNTA1	t	c	352	-1.012	--	0.3114	0.78109
	Centiloid	Longitudinal	20:33433270	20	33433270	SNTA1	t	c	352	-0.287	+-	0.7741	0.96544
	Centiloid	Longitudinal	rs6141396	20	33436147	SNTA1	a	c	106	0.838	+?	0.4021	0.78109
	Centiloid	Longitudinal	rs293721	20	33441633	SNTA1	t	c	352	-0.233	+-	0.8161	0.96544
	Grey_Matter_Volume	Cross-Sectional	rs111599092	3	49465346	DAG1	a	g	338	0.578	-+	0.5631	0.911487
	Grey_Matter_Volume	Cross-Sectional	rs73073015	3	49465733	DAG1	a	g	338	2.05	++	0.04038	0.495712
	Grey_Matter_Volume	Cross-Sectional	rs7611164	3	49471395	DAG1	t	g	338	0.104	-+	0.9175	0.975358
	Grey_Matter_Volume	Cross-Sectional	rs1568661	3	49483525	DAG1	a	g	338	0.952	++	0.341	0.718723
	Grey_Matter_Volume	Cross-Sectional	rs7374731	3	49495661	DAG1	c	g	338	0.463	+-	0.6431	0.917757
	Grey_Matter_Volume	Cross-Sectional	rs73074811	3	49516098	DAG1	a	t	338	-0.378	--	0.7055	0.952616
	Grey_Matter_Volume	Cross-Sectional	rs3870338	3	49519618	DAG1	a	g	338	0.952	++	0.341	0.718723
	Grey_Matter_Volume	Cross-Sectional	rs55935606	3	49528072	DAG1	a	g	338	0.19	-+	0.8493	0.975358
	Grey_Matter_Volume	Cross-Sectional	rs75153130	3	49530436	DAG1	a	c	338	-0.104	+-	0.9175	0.975358
	Grey_Matter_Volume	Cross-Sectional	rs13079082	3	49537375	DAG1	c	g	338	-2.124	--	0.03371	0.495712
	Grey_Matter_Volume	Cross-Sectional	rs4052546	3	49538116	DAG1	c	g	338	-0.463	-+	0.6431	0.917757
	Grey_Matter_Volume	Cross-Sectional	rs73074830	3	49539584	DAG1	a	c	338	0.272	++	0.7858	0.975358
	Grey_Matter_Volume	Cross-Sectional	rs114093899	3	49539955	DAG1	c	g	338	0.836	-+	0.4034	0.740151
	Grey_Matter_Volume	Cross-Sectional	rs9789109	18	26842291	AQP4	a	g	338	-0.09	+-	0.9284	0.975358
	Grey_Matter_Volume	Cross-Sectional	rs10164026	18	26842362	AQP4	a	c	338	-0.884	--	0.3769	0.740151
	Grey_Matter_Volume	Cross-Sectional	rs4800270	18	26844933	AQP4	t	g	338	0.584	-+	0.5593	0.911487
	Grey_Matter_Volume	Cross-Sectional	rs79668602	18	26845488	AQP4	a	g	338	1.004	++	0.3154	0.718723
	Grey_Matter_Volume	Cross-Sectional	rs12458416	18	26847267	AQP4	c	g	338	1.282	++	0.1997	0.660149
	Grey_Matter_Volume	Cross-Sectional	rs12953446	18	26848521	AQP4	a	g	338	0.489	-+	0.6251	0.911487
	Grey_Matter_Volume	Cross-Sectional	rs67461489	18	26848876	AQP4	t	c	338	-2.716	--	0.006611	0.301902
	Grey_Matter_Volume	Cross-Sectional	rs11661081	18	26850068	AQP4	a	c	338	-0.832	--	0.4052	0.740151
	Grey_Matter_Volume	Cross-Sectional	rs3763043	18	26855854	AQP4	t	c	338	-1.059	--	0.2898	0.708975
	Grey_Matter_Volume	Cross-Sectional	rs68006382	18	26856555	AQP4	a	g	338	-0.02	-+	0.9844	0.991638
	Grey_Matter_Volume	Cross-Sectional	rs335930	18	26856961	AQP4	a	c	338	-0.109	+-	0.9132	0.975358
	Grey_Matter_Volume	Cross-Sectional	rs71353405	18	26857429	AQP4	t	c	338	1.525	++	0.1272	0.660149
	Grey_Matter_Volume	Cross-Sectional	rs162009	18	26864250	AQP4	a	g	338	1.326	-+	0.185	0.660149
	Grey_Matter_Volume	Cross-Sectional	rs4800773	18	26865017	AQP4	a	g	338	1.171	++	0.2416	0.667808
	Grey_Matter_Volume	Cross-Sectional	rs3875089	18	26865469	AQP4	t	c	338	-1.969	+-	0.04894	0.515752
	Grey_Matter_Volume	Cross-Sectional	rs72878787	18	26866517	AQP4	a	g	338	1.103	++	0.2702	0.685507
	Grey_Matter_Volume	Cross-Sectional	rs162006	18	26866570	AQP4	t	c	338	-0.124	+-	0.901	0.975358
	Grey_Matter_Volume	Cross-Sectional	rs151244	18	26866755	AQP4	t	c	338	-0.311	+-	0.7557	0.953847
	Grey_Matter_Volume	Cross-Sectional	rs72878794	18	26866839	AQP4	t	c	338	-0.816	--	0.4146	0.740151
	Grey_Matter_Volume	Cross-Sectional	rs9961118	18	26866901	AQP4	t	c	338	-0.921	--	0.3573	0.738164
	Grey_Matter_Volume	Cross-Sectional	rs162004	18	26867972	AQP4	c	g	338	-0.979	--	0.3278	0.718723
	Grey_Matter_Volume	Cross-Sectional	rs72878799	18	26868165	AQP4	a	g	338	-0.913	--	0.361	0.738164
	Grey_Matter_Volume	Cross-Sectional	rs11662318	18	26869056	AQP4	t	c	338	1.599	-+	0.1098	0.660149
	Grey_Matter_Volume	Cross-Sectional	rs151246	18	26869139	AQP4	t	g	338	-2.499	+-	0.01245	0.34113
	Grey_Matter_Volume	Cross-Sectional	rs491148	18	26869803	AQP4	a	g	338	-0.958	+-	0.338	0.718723
	Grey_Matter_Volume	Cross-Sectional	rs162002	18	26871015	AQP4	a	g	338	-0.86	+-	0.39	0.740151
	Grey_Matter_Volume	Cross-Sectional	rs162001	18	26871481	AQP4	a	c	338	-0.201	-+	0.8406	0.975358
	Grey_Matter_Volume	Cross-Sectional	rs3865411	18	26871684	AQP4	a	g	338	0.059	-+	0.9528	0.975358
	Grey_Matter_Volume	Cross-Sectional	rs162000	18	26872471	AQP4	a	c	338	1.671	++	0.0947	0.648695
	Grey_Matter_Volume	Cross-Sectional	rs12969503	18	26873564	AQP4	t	g	338	-0.124	+-	0.9012	0.975358
	Grey_Matter_Volume	Cross-Sectional	rs8094228	18	26873767	AQP4	t	c	338	-0.168	-+	0.8666	0.975358
	Grey_Matter_Volume	Cross-Sectional	rs480647	18	26874290	AQP4	t	c	338	-1.199	--	0.2304	0.667808
	Grey_Matter_Volume	Cross-Sectional	rs10502478	18	26874616	AQP4	a	c	338	0.09	-+	0.928	0.975358
	Grey_Matter_Volume	Cross-Sectional	rs7234562	18	34483685	DTNA	t	c	338	0.18	-+	0.8572	0.975358
	Grey_Matter_Volume	Cross-Sectional	rs79922046	18	34485536	DTNA	a	g	338	0.047	+-	0.9627	0.976962
	Grey_Matter_Volume	Cross-Sectional	rs9955950	18	34485672	DTNA	t	c	338	0.88	++	0.3787	0.740151
	Grey_Matter_Volume	Cross-Sectional	rs12957028	18	34485948	DTNA	a	g	338	-0.387	-+	0.699	0.952616
	Grey_Matter_Volume	Cross-Sectional	rs72639491	18	34491438	DTNA	a	g	338	0.307	++	0.7589	0.953847
	Grey_Matter_Volume	Cross-Sectional	rs62097347	18	34492032	DTNA	c	g	338	-1.184	--	0.2363	0.667808
	Grey_Matter_Volume	Cross-Sectional	rs9961251	18	34492344	DTNA	t	c	338	0.148	+-	0.8827	0.975358
	Grey_Matter_Volume	Cross-Sectional	rs111846993	18	34494001	DTNA	t	c	338	-0.004	-+	0.9968	0.9968
	Grey_Matter_Volume	Cross-Sectional	rs4799769	18	34494577	DTNA	c	g	338	0.065	-+	0.9479	0.975358
	Grey_Matter_Volume	Cross-Sectional	rs8092794	18	34496273	DTNA	a	g	338	0.058	-+	0.9539	0.975358
	Grey_Matter_Volume	Cross-Sectional	rs7243528	18	34497055	DTNA	t	c	338	-1.426	--	0.1538	0.660149
	Grey_Matter_Volume	Cross-Sectional	rs79972565	18	34497194	DTNA	t	g	338	-1.371	--	0.1704	0.660149
	Grey_Matter_Volume	Cross-Sectional	rs35839923	18	34497764	DTNA	a	g	338	-0.529	+-	0.5967	0.911487
	Grey_Matter_Volume	Cross-Sectional	rs62097349	18	34499519	DTNA	a	g	338	0.327	-+	0.7435	0.953847
	Grey_Matter_Volume	Cross-Sectional	rs9965622	18	34502153	DTNA	t	c	338	-1.745	--	0.08103	0.648695
	Grey_Matter_Volume	Cross-Sectional	rs62098462	18	34504364	DTNA	t	c	338	0.968	++	0.333	0.718723
	Grey_Matter_Volume	Cross-Sectional	rs75127284	18	34506592	DTNA	a	c	338	1.107	-+	0.2682	0.685507
	Grey_Matter_Volume	Cross-Sectional	rs2439861	18	34507940	DTNA	a	g	338	-0.569	+-	0.5695	0.911487
	Grey_Matter_Volume	Cross-Sectional	rs35982920	18	34516411	DTNA	a	g	338	0.213	-+	0.8311	0.975358
	Grey_Matter_Volume	Cross-Sectional	rs2509597	18	34528430	DTNA	a	t	338	-0.409	+-	0.6823	0.952616
	Grey_Matter_Volume	Cross-Sectional	rs71363449	18	34531997	DTNA	t	c	338	-1.795	--	0.07269	0.648695
	Grey_Matter_Volume	Cross-Sectional	rs2439853	18	34533937	DTNA	a	g	338	-0.364	--	0.7157	0.952616
	Grey_Matter_Volume	Cross-Sectional	rs2439000	18	34536414	DTNA	c	g	338	-1.267	+-	0.2052	0.660149
	Grey_Matter_Volume	Cross-Sectional	rs11875892	18	34544032	DTNA	a	g	338	-0.208	-+	0.8354	0.975358
	Grey_Matter_Volume	Cross-Sectional	rs1967583	18	34544573	DTNA	t	c	338	0.809	++	0.4186	0.740151
	Grey_Matter_Volume	Cross-Sectional	rs28856895	18	34555507	DTNA	a	g	338	-1.679	--	0.09313	0.648695
	Grey_Matter_Volume	Cross-Sectional	rs77973497	18	34560529	DTNA	a	c	338	-0.209	-+	0.8342	0.975358
	Grey_Matter_Volume	Cross-Sectional	rs2579796	18	34569243	DTNA	a	g	338	-0.518	-+	0.6045	0.911487
	Grey_Matter_Volume	Cross-Sectional	rs2579797	18	34571732	DTNA	t	g	338	1.202	-+	0.2294	0.667808
	Grey_Matter_Volume	Cross-Sectional	rs2685557	18	34576782	DTNA	t	c	338	-0.496	-+	0.6195	0.911487
	Grey_Matter_Volume	Cross-Sectional	rs9958492	18	34577783	DTNA	t	c	338	-2.193	--	0.02831	0.495712
	Grey_Matter_Volume	Cross-Sectional	rs2579802	18	34579787	DTNA	a	c	338	0.598	++	0.5502	0.911487
	Grey_Matter_Volume	Cross-Sectional	rs74920018	18	34607557	DTNA	a	t	338	-0.34	-+	0.7342	0.953847
	Grey_Matter_Volume	Cross-Sectional	rs1439127	18	34607759	DTNA	a	t	338	1.026	++	0.3051	0.718723
	Grey_Matter_Volume	Cross-Sectional	rs12327368	18	34611361	DTNA	a	g	338	-2.241	--	0.02501	0.495712
	Grey_Matter_Volume	Cross-Sectional	rs62097188	18	34611412	DTNA	a	g	338	0.686	++	0.4924	0.843235
	Grey_Matter_Volume	Cross-Sectional	rs9807153	18	34635520	DTNA	a	t	338	-0.488	--	0.6254	0.911487
	Grey_Matter_Volume	Cross-Sectional	rs2730126	18	34635939	DTNA	a	c	338	-0.822	--	0.4108	0.740151
	Grey_Matter_Volume	Cross-Sectional	rs1659526	18	34644451	DTNA	a	g	338	0.533	-+	0.5942	0.911487
	Grey_Matter_Volume	Cross-Sectional	rs17642885	18	34649976	DTNA	t	c	338	-0.317	-+	0.7513	0.953847
	Grey_Matter_Volume	Cross-Sectional	rs1240974	18	34650949	DTNA	t	c	338	1.427	-+	0.1536	0.660149
	Grey_Matter_Volume	Cross-Sectional	rs55869511	18	34651262	DTNA	a	c	338	2.02	++	0.04342	0.495712
	Grey_Matter_Volume	Cross-Sectional	rs12955208	18	34656737	DTNA	a	g	338	1.261	++	0.2072	0.660149
	Grey_Matter_Volume	Cross-Sectional	rs72953203	18	34660068	DTNA	a	g	338	-1.165	--	0.2441	0.667808
	Grey_Matter_Volume	Cross-Sectional	rs9946070	18	34665505	DTNA	a	g	338	-1.044	--	0.2964	0.7124
	Grey_Matter_Volume	Cross-Sectional	rs72953211	18	34673381	DTNA	a	c	338	-1.193	--	0.2327	0.667808
	Grey_Matter_Volume	Cross-Sectional	rs55971592	18	34697328	DTNA	a	g	338	-0.128	+-	0.8985	0.975358
	Grey_Matter_Volume	Cross-Sectional	rs78837792	18	34703359	DTNA	t	c	338	0.824	++	0.4099	0.740151
	Grey_Matter_Volume	Cross-Sectional	rs11663468	18	34707936	DTNA	t	c	338	1.373	++	0.1699	0.660149
	Grey_Matter_Volume	Cross-Sectional	rs12963825	18	34709484	DTNA	a	g	338	-2.157	--	0.03104	0.495712
	Grey_Matter_Volume	Cross-Sectional	rs1480432	18	34727166	DTNA	t	g	338	-0.501	-+	0.6162	0.911487
	Grey_Matter_Volume	Cross-Sectional	rs45556134	18	34729425	DTNA	a	g	338	-0.186	+-	0.8522	0.975358
	Grey_Matter_Volume	Cross-Sectional	rs899828	18	34732688	DTNA	t	g	338	2.064	++	0.03901	0.495712
	Grey_Matter_Volume	Cross-Sectional	rs17556884	18	34736455	DTNA	t	c	338	3.064	++	0.002185	0.149673
	Grey_Matter_Volume	Cross-Sectional	rs1480428	18	34738732	DTNA	a	g	338	1.217	++	0.2235	0.667808
	Grey_Matter_Volume	Cross-Sectional	rs12957349	18	34739291	DTNA	t	c	338	1.38	++	0.1677	0.660149
	Grey_Matter_Volume	Cross-Sectional	rs12608110	18	34752198	DTNA	a	g	338	1.289	++	0.1975	0.660149
	Grey_Matter_Volume	Cross-Sectional	rs7228547	18	34760039	DTNA	a	g	338	-1.125	--	0.2607	0.685507
	Grey_Matter_Volume	Cross-Sectional	rs8099437	18	34761448	DTNA	t	g	338	1.355	++	0.1755	0.660149
	Grey_Matter_Volume	Cross-Sectional	rs72955132	18	34762382	DTNA	a	g	338	3.152	++	0.001619	0.149673
	Grey_Matter_Volume	Cross-Sectional	rs1817452	18	34776629	DTNA	t	c	338	1.676	++	0.09365	0.648695
	Grey_Matter_Volume	Cross-Sectional	rs56404226	18	34778060	DTNA	a	g	338	-1.689	--	0.09118	0.648695
	Grey_Matter_Volume	Cross-Sectional	rs72955175	18	34779045	DTNA	a	t	338	-1.341	+-	0.1799	0.660149
	Grey_Matter_Volume	Cross-Sectional	rs12608251	18	34782906	DTNA	t	g	338	1.478	-+	0.1394	0.660149
	Grey_Matter_Volume	Cross-Sectional	rs76880720	18	34791141	DTNA	a	c	338	-1.355	--	0.1753	0.660149
	Grey_Matter_Volume	Cross-Sectional	rs9989533	18	34793909	DTNA	t	c	338	0.058	+-	0.954	0.975358
	Grey_Matter_Volume	Cross-Sectional	rs79500711	18	34794379	DTNA	a	g	338	0.363	-+	0.7162	0.952616
	Grey_Matter_Volume	Cross-Sectional	rs138856611	18	34801684	DTNA	t	g	338	0.741	++	0.4587	0.795467
	Grey_Matter_Volume	Cross-Sectional	rs62097226	18	34804223	DTNA	a	t	338	0.187	-+	0.8515	0.975358
	Grey_Matter_Volume	Cross-Sectional	rs4458079	18	34806161	DTNA	t	c	338	0.165	+-	0.8689	0.975358
	Grey_Matter_Volume	Cross-Sectional	rs8086358	18	34813672	DTNA	t	g	338	1.549	++	0.1214	0.660149
	Grey_Matter_Volume	Cross-Sectional	rs72963047	18	34818804	DTNA	a	c	338	1.068	++	0.2855	0.708975
	Grey_Matter_Volume	Cross-Sectional	rs17557660	18	34831178	DTNA	a	t	338	1.553	++	0.1204	0.660149
	Grey_Matter_Volume	Cross-Sectional	rs1790533	18	34831631	DTNA	a	g	338	1.397	++	0.1623	0.660149
	Grey_Matter_Volume	Cross-Sectional	rs4799782	18	34841123	DTNA	a	g	338	-0.975	--	0.3297	0.718723
	Grey_Matter_Volume	Cross-Sectional	rs1786604	18	34846264	DTNA	a	g	338	-1.154	+-	0.2486	0.667808
	Grey_Matter_Volume	Cross-Sectional	rs7233779	18	34863262	DTNA	a	g	338	0.398	-+	0.6905	0.952616
	Grey_Matter_Volume	Cross-Sectional	rs644982	18	34869793	DTNA	a	g	338	0.804	-+	0.4214	0.740151
	Grey_Matter_Volume	Cross-Sectional	rs11659517	18	34870978	DTNA	a	t	338	1.363	++	0.1729	0.660149
	Grey_Matter_Volume	Cross-Sectional	rs524969	18	34872102	DTNA	a	t	338	-1.48	+-	0.1389	0.660149
	Grey_Matter_Volume	Cross-Sectional	rs637914	18	34876135	DTNA	a	t	338	-0.897	+-	0.3695	0.740151
	Grey_Matter_Volume	Cross-Sectional	rs9304141	18	34879143	DTNA	t	c	338	-1.423	--	0.1546	0.660149
	Grey_Matter_Volume	Cross-Sectional	rs2288085	18	34879740	DTNA	a	g	338	-2.541	--	0.01104	0.34113
	Grey_Matter_Volume	Cross-Sectional	rs17558116	18	34882719	DTNA	t	c	338	-0.203	--	0.8395	0.975358
	Grey_Matter_Volume	Cross-Sectional	rs10502637	18	34890006	DTNA	t	c	338	-1.743	--	0.08135	0.648695
	Grey_Matter_Volume	Cross-Sectional	rs149163416	18	34898841	DTNA	a	g	338	1.265	++	0.206	0.660149
	Grey_Matter_Volume	Cross-Sectional	20:33413780	20	33413780	SNTA1	a	t	338	-0.628	--	0.5299	0.896251
	Grey_Matter_Volume	Cross-Sectional	rs291683	20	33431611	SNTA1	t	c	338	-0.553	--	0.5802	0.911487
	Grey_Matter_Volume	Cross-Sectional	20:33433270	20	33433270	SNTA1	t	c	338	-0.344	+-	0.7305	0.953847
	Grey_Matter_Volume	Cross-Sectional	rs6141396	20	33436147	SNTA1	a	c	93	0.542	+?	0.5881	0.911487
	Grey_Matter_Volume	Cross-Sectional	rs293721	20	33441633	SNTA1	t	c	338	0.402	-+	0.6878	0.952616
	Grey_Matter_Volume	Longitudinal	rs111599092	3	49465346	DAG1	a	g	111	0.788	-+	0.4306	0.861091
	Grey_Matter_Volume	Longitudinal	rs73073015	3	49465733	DAG1	a	g	111	1.761	++	0.07832	0.6439
	Grey_Matter_Volume	Longitudinal	rs7611164	3	49471395	DAG1	t	g	111	-0.251	+-	0.8016	0.971851
	Grey_Matter_Volume	Longitudinal	rs1568661	3	49483525	DAG1	a	g	111	0.445	-+	0.6563	0.931999
	Grey_Matter_Volume	Longitudinal	rs7374731	3	49495661	DAG1	c	g	111	1.16	++	0.2461	0.813716
	Grey_Matter_Volume	Longitudinal	rs73074811	3	49516098	DAG1	a	t	111	0.431	++	0.6666	0.931999
	Grey_Matter_Volume	Longitudinal	rs3870338	3	49519618	DAG1	a	g	111	0.445	-+	0.6563	0.931999
	Grey_Matter_Volume	Longitudinal	rs55935606	3	49528072	DAG1	a	g	111	-1.069	--	0.2849	0.861091
	Grey_Matter_Volume	Longitudinal	rs75153130	3	49530436	DAG1	a	c	111	0.251	-+	0.8016	0.971851
	Grey_Matter_Volume	Longitudinal	rs13079082	3	49537375	DAG1	c	g	111	-0.068	--	0.9455	0.986803
	Grey_Matter_Volume	Longitudinal	rs4052546	3	49538116	DAG1	c	g	111	-1.16	--	0.2461	0.813716
	Grey_Matter_Volume	Longitudinal	rs73074830	3	49539584	DAG1	a	c	111	0.182	+-	0.8556	0.975596
	Grey_Matter_Volume	Longitudinal	rs114093899	3	49539955	DAG1	c	g	111	-0.799	+-	0.4243	0.861091
	Grey_Matter_Volume	Longitudinal	rs9789109	18	26842291	AQP4	a	g	111	-0.384	+-	0.7007	0.931999
	Grey_Matter_Volume	Longitudinal	rs10164026	18	26842362	AQP4	a	c	111	-0.224	+-	0.8226	0.972936
	Grey_Matter_Volume	Longitudinal	rs4800270	18	26844933	AQP4	t	g	111	-1.654	+-	0.09808	0.6439
	Grey_Matter_Volume	Longitudinal	rs79668602	18	26845488	AQP4	a	g	111	0.06	+-	0.9519	0.986803
	Grey_Matter_Volume	Longitudinal	rs12458416	18	26847267	AQP4	c	g	111	-0.364	-+	0.7161	0.943324
	Grey_Matter_Volume	Longitudinal	rs12953446	18	26848521	AQP4	a	g	111	0.576	+-	0.5644	0.894859
	Grey_Matter_Volume	Longitudinal	rs67461489	18	26848876	AQP4	t	c	111	-0.634	--	0.5261	0.894859
	Grey_Matter_Volume	Longitudinal	rs11661081	18	26850068	AQP4	a	c	111	1.572	++	0.116	0.6439
	Grey_Matter_Volume	Longitudinal	rs3763043	18	26855854	AQP4	t	c	111	-0.86	+-	0.3901	0.861091
	Grey_Matter_Volume	Longitudinal	rs68006382	18	26856555	AQP4	a	g	111	1.151	-+	0.2499	0.813716
	Grey_Matter_Volume	Longitudinal	rs335930	18	26856961	AQP4	a	c	111	0.173	-+	0.8623	0.975596
	Grey_Matter_Volume	Longitudinal	rs71353405	18	26857429	AQP4	t	c	111	1.612	++	0.107	0.6439
	Grey_Matter_Volume	Longitudinal	rs162009	18	26864250	AQP4	a	g	111	0.572	++	0.5674	0.894859
	Grey_Matter_Volume	Longitudinal	rs4800773	18	26865017	AQP4	a	g	111	-0.622	--	0.5338	0.894859
	Grey_Matter_Volume	Longitudinal	rs3875089	18	26865469	AQP4	t	c	111	-0.308	--	0.758	0.971851
	Grey_Matter_Volume	Longitudinal	rs72878787	18	26866517	AQP4	a	g	111	-1.888	--	0.05906	0.6439
	Grey_Matter_Volume	Longitudinal	rs162006	18	26866570	AQP4	t	c	111	0.561	++	0.5748	0.894859
	Grey_Matter_Volume	Longitudinal	rs151244	18	26866755	AQP4	t	c	111	0.276	+-	0.7828	0.971851
	Grey_Matter_Volume	Longitudinal	rs72878794	18	26866839	AQP4	t	c	111	-0.478	-+	0.6325	0.931999
	Grey_Matter_Volume	Longitudinal	rs9961118	18	26866901	AQP4	t	c	111	0.414	-+	0.6787	0.931999
	Grey_Matter_Volume	Longitudinal	rs162004	18	26867972	AQP4	c	g	111	0.272	++	0.7858	0.971851
	Grey_Matter_Volume	Longitudinal	rs72878799	18	26868165	AQP4	a	g	111	0.092	-+	0.927	0.986803
	Grey_Matter_Volume	Longitudinal	rs11662318	18	26869056	AQP4	t	c	111	-0.064	+-	0.9493	0.986803
	Grey_Matter_Volume	Longitudinal	rs151246	18	26869139	AQP4	t	g	111	0.576	-+	0.5644	0.894859
	Grey_Matter_Volume	Longitudinal	rs491148	18	26869803	AQP4	a	g	111	0.428	-+	0.6685	0.931999
	Grey_Matter_Volume	Longitudinal	rs162002	18	26871015	AQP4	a	g	111	-0.825	--	0.4093	0.861091
	Grey_Matter_Volume	Longitudinal	rs162001	18	26871481	AQP4	a	c	111	1.268	++	0.2049	0.802005
	Grey_Matter_Volume	Longitudinal	rs3865411	18	26871684	AQP4	a	g	111	-0.008	+-	0.9937	0.9937
	Grey_Matter_Volume	Longitudinal	rs162000	18	26872471	AQP4	a	c	111	0.03	-+	0.9761	0.986803
	Grey_Matter_Volume	Longitudinal	rs12969503	18	26873564	AQP4	t	g	111	0.872	++	0.3831	0.861091
	Grey_Matter_Volume	Longitudinal	rs8094228	18	26873767	AQP4	t	c	111	-1.673	--	0.09438	0.6439
	Grey_Matter_Volume	Longitudinal	rs480647	18	26874290	AQP4	t	c	111	1.438	-+	0.1503	0.6439
	Grey_Matter_Volume	Longitudinal	rs10502478	18	26874616	AQP4	a	c	111	0.39	++	0.6965	0.931999
	Grey_Matter_Volume	Longitudinal	rs7234562	18	34483685	DTNA	t	c	111	3.329	++	0.0008728	0.119574
	Grey_Matter_Volume	Longitudinal	rs79922046	18	34485536	DTNA	a	g	111	1.05	++	0.2938	0.861091
	Grey_Matter_Volume	Longitudinal	rs9955950	18	34485672	DTNA	t	c	111	0.403	-+	0.6869	0.931999
	Grey_Matter_Volume	Longitudinal	rs12957028	18	34485948	DTNA	a	g	111	-0.733	--	0.4634	0.861091
	Grey_Matter_Volume	Longitudinal	rs72639491	18	34491438	DTNA	a	g	111	1.207	++	0.2276	0.813716
	Grey_Matter_Volume	Longitudinal	rs62097347	18	34492032	DTNA	c	g	111	0.18	+-	0.8573	0.975596
	Grey_Matter_Volume	Longitudinal	rs9961251	18	34492344	DTNA	t	c	111	1.005	++	0.3149	0.861091
	Grey_Matter_Volume	Longitudinal	rs111846993	18	34494001	DTNA	t	c	111	0.165	+-	0.8688	0.975596
	Grey_Matter_Volume	Longitudinal	rs4799769	18	34494577	DTNA	c	g	111	-0.765	+-	0.4441	0.861091
	Grey_Matter_Volume	Longitudinal	rs8092794	18	34496273	DTNA	a	g	111	0.603	-+	0.5465	0.894859
	Grey_Matter_Volume	Longitudinal	rs7243528	18	34497055	DTNA	t	c	111	-0.723	+-	0.4696	0.861091
	Grey_Matter_Volume	Longitudinal	rs79972565	18	34497194	DTNA	t	g	111	0.517	-+	0.605	0.920944
	Grey_Matter_Volume	Longitudinal	rs35839923	18	34497764	DTNA	a	g	111	-1.634	-+	0.1023	0.6439
	Grey_Matter_Volume	Longitudinal	rs62097349	18	34499519	DTNA	a	g	111	-1.863	--	0.06248	0.6439
	Grey_Matter_Volume	Longitudinal	rs9965622	18	34502153	DTNA	t	c	111	0.908	++	0.3637	0.861091
	Grey_Matter_Volume	Longitudinal	rs62098462	18	34504364	DTNA	t	c	111	-0.539	+-	0.5901	0.908356
	Grey_Matter_Volume	Longitudinal	rs75127284	18	34506592	DTNA	a	c	111	-0.973	--	0.3307	0.861091
	Grey_Matter_Volume	Longitudinal	rs2439861	18	34507940	DTNA	a	g	111	0.391	+-	0.6958	0.931999
	Grey_Matter_Volume	Longitudinal	rs35982920	18	34516411	DTNA	a	g	111	0.641	+-	0.5217	0.894859
	Grey_Matter_Volume	Longitudinal	rs2509597	18	34528430	DTNA	a	t	111	1.425	+-	0.1543	0.6439
	Grey_Matter_Volume	Longitudinal	rs71363449	18	34531997	DTNA	t	c	111	-1.493	--	0.1354	0.6439
	Grey_Matter_Volume	Longitudinal	rs2439853	18	34533937	DTNA	a	g	111	-1.089	-+	0.2762	0.859986
	Grey_Matter_Volume	Longitudinal	rs2439000	18	34536414	DTNA	c	g	111	-0.101	+-	0.9195	0.986803
	Grey_Matter_Volume	Longitudinal	rs11875892	18	34544032	DTNA	a	g	111	0.11	+-	0.9124	0.986803
	Grey_Matter_Volume	Longitudinal	rs1967583	18	34544573	DTNA	t	c	111	-0.241	+-	0.8097	0.972936
	Grey_Matter_Volume	Longitudinal	rs28856895	18	34555507	DTNA	a	g	111	-0.759	--	0.4477	0.861091
	Grey_Matter_Volume	Longitudinal	rs77973497	18	34560529	DTNA	a	c	111	0.256	-+	0.7977	0.971851
	Grey_Matter_Volume	Longitudinal	rs2579796	18	34569243	DTNA	a	g	111	-0.966	-+	0.334	0.861091
	Grey_Matter_Volume	Longitudinal	rs2579797	18	34571732	DTNA	t	g	111	0.101	-+	0.9195	0.986803
	Grey_Matter_Volume	Longitudinal	rs2685557	18	34576782	DTNA	t	c	111	-0.966	-+	0.334	0.861091
	Grey_Matter_Volume	Longitudinal	rs9958492	18	34577783	DTNA	t	c	111	-1.598	--	0.1101	0.6439
	Grey_Matter_Volume	Longitudinal	rs2579802	18	34579787	DTNA	a	c	111	0.669	++	0.5034	0.886812
	Grey_Matter_Volume	Longitudinal	rs74920018	18	34607557	DTNA	a	t	111	0.432	++	0.6661	0.931999
	Grey_Matter_Volume	Longitudinal	rs1439127	18	34607759	DTNA	a	t	111	-1.422	--	0.1551	0.6439
	Grey_Matter_Volume	Longitudinal	rs12327368	18	34611361	DTNA	a	g	111	-1.598	--	0.1101	0.6439
	Grey_Matter_Volume	Longitudinal	rs62097188	18	34611412	DTNA	a	g	111	0.902	-+	0.3672	0.861091
	Grey_Matter_Volume	Longitudinal	rs9807153	18	34635520	DTNA	a	t	111	0.329	+-	0.742	0.968133
	Grey_Matter_Volume	Longitudinal	rs2730126	18	34635939	DTNA	a	c	111	-0.667	--	0.5049	0.886812
	Grey_Matter_Volume	Longitudinal	rs1659526	18	34644451	DTNA	a	g	111	0.184	-+	0.8543	0.975596
	Grey_Matter_Volume	Longitudinal	rs17642885	18	34649976	DTNA	t	c	111	1.039	++	0.2987	0.861091
	Grey_Matter_Volume	Longitudinal	rs1240974	18	34650949	DTNA	t	c	111	0.223	-+	0.8238	0.972936
	Grey_Matter_Volume	Longitudinal	rs55869511	18	34651262	DTNA	a	c	111	2.179	++	0.02935	0.6439
	Grey_Matter_Volume	Longitudinal	rs12955208	18	34656737	DTNA	a	g	111	1.625	++	0.1041	0.6439
	Grey_Matter_Volume	Longitudinal	rs72953203	18	34660068	DTNA	a	g	111	0.567	+-	0.5705	0.894859
	Grey_Matter_Volume	Longitudinal	rs9946070	18	34665505	DTNA	a	g	111	-1.956	--	0.05045	0.6439
	Grey_Matter_Volume	Longitudinal	rs72953211	18	34673381	DTNA	a	c	111	0.507	+-	0.6121	0.921513
	Grey_Matter_Volume	Longitudinal	rs55971592	18	34697328	DTNA	a	g	111	0.156	+-	0.8759	0.975596
	Grey_Matter_Volume	Longitudinal	rs78837792	18	34703359	DTNA	t	c	111	-1.241	--	0.2146	0.802005
	Grey_Matter_Volume	Longitudinal	rs11663468	18	34707936	DTNA	t	c	111	-0.828	-+	0.4077	0.861091
	Grey_Matter_Volume	Longitudinal	rs12963825	18	34709484	DTNA	a	g	111	-1.775	-+	0.07588	0.6439
	Grey_Matter_Volume	Longitudinal	rs1480432	18	34727166	DTNA	t	g	111	-0.72	-+	0.4714	0.861091
	Grey_Matter_Volume	Longitudinal	rs45556134	18	34729425	DTNA	a	g	111	0.087	-+	0.9303	0.986803
	Grey_Matter_Volume	Longitudinal	rs899828	18	34732688	DTNA	t	g	111	0.702	-+	0.4828	0.870311
	Grey_Matter_Volume	Longitudinal	rs17556884	18	34736455	DTNA	t	c	111	1.985	++	0.04718	0.6439
	Grey_Matter_Volume	Longitudinal	rs1480428	18	34738732	DTNA	a	g	111	2.101	++	0.03568	0.6439
	Grey_Matter_Volume	Longitudinal	rs12957349	18	34739291	DTNA	t	c	111	1.625	++	0.1041	0.6439
	Grey_Matter_Volume	Longitudinal	rs12608110	18	34752198	DTNA	a	g	111	0.864	++	0.3877	0.861091
	Grey_Matter_Volume	Longitudinal	rs7228547	18	34760039	DTNA	a	g	111	0.828	+-	0.4077	0.861091
	Grey_Matter_Volume	Longitudinal	rs8099437	18	34761448	DTNA	t	g	111	2.101	++	0.03568	0.6439
	Grey_Matter_Volume	Longitudinal	rs72955132	18	34762382	DTNA	a	g	111	1.985	++	0.04718	0.6439
	Grey_Matter_Volume	Longitudinal	rs1817452	18	34776629	DTNA	t	c	111	1.676	++	0.09381	0.6439
	Grey_Matter_Volume	Longitudinal	rs56404226	18	34778060	DTNA	a	g	111	-1.456	--	0.1453	0.6439
	Grey_Matter_Volume	Longitudinal	rs72955175	18	34779045	DTNA	a	t	111	1.338	++	0.1807	0.728115
	Grey_Matter_Volume	Longitudinal	rs12608251	18	34782906	DTNA	t	g	111	-0.293	-+	0.7698	0.971851
	Grey_Matter_Volume	Longitudinal	rs76880720	18	34791141	DTNA	a	c	111	-0.93	+-	0.3523	0.861091
	Grey_Matter_Volume	Longitudinal	rs9989533	18	34793909	DTNA	t	c	111	1.854	++	0.06377	0.6439
	Grey_Matter_Volume	Longitudinal	rs79500711	18	34794379	DTNA	a	g	111	-0.038	+-	0.9695	0.986803
	Grey_Matter_Volume	Longitudinal	rs138856611	18	34801684	DTNA	t	g	111	0.777	-+	0.4374	0.861091
	Grey_Matter_Volume	Longitudinal	rs62097226	18	34804223	DTNA	a	t	111	-0.751	--	0.4526	0.861091
	Grey_Matter_Volume	Longitudinal	rs4458079	18	34806161	DTNA	t	c	111	-0.026	+-	0.9796	0.986803
	Grey_Matter_Volume	Longitudinal	rs8086358	18	34813672	DTNA	t	g	111	-0.878	--	0.3798	0.861091
	Grey_Matter_Volume	Longitudinal	rs72963047	18	34818804	DTNA	a	c	111	0.425	++	0.6709	0.931999
	Grey_Matter_Volume	Longitudinal	rs17557660	18	34831178	DTNA	a	t	111	1.666	++	0.09573	0.6439
	Grey_Matter_Volume	Longitudinal	rs1790533	18	34831631	DTNA	a	g	111	-0.583	-+	0.56	0.894859
	Grey_Matter_Volume	Longitudinal	rs4799782	18	34841123	DTNA	a	g	111	-0.796	+-	0.4262	0.861091
	Grey_Matter_Volume	Longitudinal	rs1786604	18	34846264	DTNA	a	g	111	1.544	++	0.1225	0.6439
	Grey_Matter_Volume	Longitudinal	rs7233779	18	34863262	DTNA	a	g	111	-0.081	-+	0.9358	0.986803
	Grey_Matter_Volume	Longitudinal	rs644982	18	34869793	DTNA	a	g	111	-1.459	-+	0.1447	0.6439
	Grey_Matter_Volume	Longitudinal	rs11659517	18	34870978	DTNA	a	t	111	0.878	-+	0.3798	0.861091
	Grey_Matter_Volume	Longitudinal	rs524969	18	34872102	DTNA	a	t	111	1.03	+-	0.3031	0.861091
	Grey_Matter_Volume	Longitudinal	rs637914	18	34876135	DTNA	a	t	111	1.437	++	0.1508	0.6439
	Grey_Matter_Volume	Longitudinal	rs9304141	18	34879143	DTNA	t	c	111	-0.036	-+	0.9709	0.986803
	Grey_Matter_Volume	Longitudinal	rs2288085	18	34879740	DTNA	a	g	111	-1.564	--	0.1177	0.6439
	Grey_Matter_Volume	Longitudinal	rs17558116	18	34882719	DTNA	t	c	111	1.173	-+	0.2407	0.813716
	Grey_Matter_Volume	Longitudinal	rs10502637	18	34890006	DTNA	t	c	111	-0.264	-+	0.7919	0.971851
	Grey_Matter_Volume	Longitudinal	rs149163416	18	34898841	DTNA	a	g	111	1.137	++	0.2554	0.813716
	Grey_Matter_Volume	Longitudinal	20:33413780	20	33413780	SNTA1	a	t	111	-1.817	--	0.06917	0.6439
	Grey_Matter_Volume	Longitudinal	rs291683	20	33431611	SNTA1	t	c	111	0.859	-+	0.3903	0.861091
	Grey_Matter_Volume	Longitudinal	20:33433270	20	33433270	SNTA1	t	c	111	-0.21	+-	0.8335	0.975596
	Grey_Matter_Volume	Longitudinal	rs6141396	20	33436147	SNTA1	a	c	47	1.236	+?	0.2166	0.802005
	Grey_Matter_Volume	Longitudinal	rs293721	20	33441633	SNTA1	t	c	111	0.834	-+	0.4045	0.861091
	Hippocampal_Volume	Cross-Sectional	rs111599092	3	49465346	DAG1	a	g	338	0.163	+-	0.8702	0.924166
	Hippocampal_Volume	Cross-Sectional	rs73073015	3	49465733	DAG1	a	g	338	1.427	++	0.1537	0.914133
	Hippocampal_Volume	Cross-Sectional	rs7611164	3	49471395	DAG1	t	g	338	-0.332	-+	0.7397	0.914133
	Hippocampal_Volume	Cross-Sectional	rs1568661	3	49483525	DAG1	a	g	338	1.305	++	0.192	0.914133
	Hippocampal_Volume	Cross-Sectional	rs7374731	3	49495661	DAG1	c	g	338	1.498	++	0.134	0.914133
	Hippocampal_Volume	Cross-Sectional	rs73074811	3	49516098	DAG1	a	t	338	-0.876	--	0.381	0.914133
	Hippocampal_Volume	Cross-Sectional	rs3870338	3	49519618	DAG1	a	g	338	1.305	++	0.192	0.914133
	Hippocampal_Volume	Cross-Sectional	rs55935606	3	49528072	DAG1	a	g	338	-1.493	--	0.1355	0.914133
	Hippocampal_Volume	Cross-Sectional	rs75153130	3	49530436	DAG1	a	c	338	0.332	+-	0.7397	0.914133
	Hippocampal_Volume	Cross-Sectional	rs13079082	3	49537375	DAG1	c	g	338	0.051	+-	0.9592	0.983844
	Hippocampal_Volume	Cross-Sectional	rs4052546	3	49538116	DAG1	c	g	338	-1.498	--	0.134	0.914133
	Hippocampal_Volume	Cross-Sectional	rs73074830	3	49539584	DAG1	a	c	338	0.233	-+	0.8158	0.918012
	Hippocampal_Volume	Cross-Sectional	rs114093899	3	49539955	DAG1	c	g	338	-0.972	--	0.3308	0.914133
	Hippocampal_Volume	Cross-Sectional	rs9789109	18	26842291	AQP4	a	g	338	-0.296	-+	0.7671	0.914133
	Hippocampal_Volume	Cross-Sectional	rs10164026	18	26842362	AQP4	a	c	338	-1.225	--	0.2205	0.914133
	Hippocampal_Volume	Cross-Sectional	rs4800270	18	26844933	AQP4	t	g	338	1.006	++	0.3145	0.914133
	Hippocampal_Volume	Cross-Sectional	rs79668602	18	26845488	AQP4	a	g	338	-0.015	+-	0.9877	0.9883
	Hippocampal_Volume	Cross-Sectional	rs12458416	18	26847267	AQP4	c	g	338	0.446	-+	0.6557	0.914133
	Hippocampal_Volume	Cross-Sectional	rs12953446	18	26848521	AQP4	a	g	338	1.124	++	0.2609	0.914133
	Hippocampal_Volume	Cross-Sectional	rs67461489	18	26848876	AQP4	t	c	338	-1.931	--	0.05349	0.914133
	Hippocampal_Volume	Cross-Sectional	rs11661081	18	26850068	AQP4	a	c	338	-0.642	--	0.5207	0.914133
	Hippocampal_Volume	Cross-Sectional	rs3763043	18	26855854	AQP4	t	c	338	-0.726	+-	0.4681	0.914133
	Hippocampal_Volume	Cross-Sectional	rs68006382	18	26856555	AQP4	a	g	338	0.568	-+	0.5703	0.914133
	Hippocampal_Volume	Cross-Sectional	rs335930	18	26856961	AQP4	a	c	338	-0.808	+-	0.4191	0.914133
	Hippocampal_Volume	Cross-Sectional	rs71353405	18	26857429	AQP4	t	c	338	0.047	++	0.9623	0.983844
	Hippocampal_Volume	Cross-Sectional	rs162009	18	26864250	AQP4	a	g	338	1.403	++	0.1606	0.914133
	Hippocampal_Volume	Cross-Sectional	rs4800773	18	26865017	AQP4	a	g	338	-0.262	+-	0.7932	0.914133
	Hippocampal_Volume	Cross-Sectional	rs3875089	18	26865469	AQP4	t	c	338	-1.141	--	0.2539	0.914133
	Hippocampal_Volume	Cross-Sectional	rs72878787	18	26866517	AQP4	a	g	338	0.755	++	0.45	0.914133
	Hippocampal_Volume	Cross-Sectional	rs162006	18	26866570	AQP4	t	c	338	-0.454	--	0.6498	0.914133
	Hippocampal_Volume	Cross-Sectional	rs151244	18	26866755	AQP4	t	c	338	-0.686	+-	0.4924	0.914133
	Hippocampal_Volume	Cross-Sectional	rs72878794	18	26866839	AQP4	t	c	338	-1.431	--	0.1523	0.914133
	Hippocampal_Volume	Cross-Sectional	rs9961118	18	26866901	AQP4	t	c	338	0.739	++	0.4602	0.914133
	Hippocampal_Volume	Cross-Sectional	rs162004	18	26867972	AQP4	c	g	338	1.085	++	0.2779	0.914133
	Hippocampal_Volume	Cross-Sectional	rs72878799	18	26868165	AQP4	a	g	338	0.497	++	0.6195	0.914133
	Hippocampal_Volume	Cross-Sectional	rs11662318	18	26869056	AQP4	t	c	338	2.032	++	0.04211	0.914133
	Hippocampal_Volume	Cross-Sectional	rs151246	18	26869139	AQP4	t	g	338	-0.323	+-	0.7466	0.914133
	Hippocampal_Volume	Cross-Sectional	rs491148	18	26869803	AQP4	a	g	338	-0.959	--	0.3377	0.914133
	Hippocampal_Volume	Cross-Sectional	rs162002	18	26871015	AQP4	a	g	338	-0.199	+-	0.8426	0.924166
	Hippocampal_Volume	Cross-Sectional	rs162001	18	26871481	AQP4	a	c	338	-0.928	--	0.3535	0.914133
	Hippocampal_Volume	Cross-Sectional	rs3865411	18	26871684	AQP4	a	g	338	0.532	-+	0.5948	0.914133
	Hippocampal_Volume	Cross-Sectional	rs162000	18	26872471	AQP4	a	c	338	-0.118	--	0.9064	0.947914
	Hippocampal_Volume	Cross-Sectional	rs12969503	18	26873564	AQP4	t	g	338	-0.782	--	0.4343	0.914133
	Hippocampal_Volume	Cross-Sectional	rs8094228	18	26873767	AQP4	t	c	338	0.826	++	0.4086	0.914133
	Hippocampal_Volume	Cross-Sectional	rs480647	18	26874290	AQP4	t	c	338	-0.253	+-	0.7999	0.914133
	Hippocampal_Volume	Cross-Sectional	rs10502478	18	26874616	AQP4	a	c	338	-1.207	-+	0.2275	0.914133
	Hippocampal_Volume	Cross-Sectional	rs7234562	18	34483685	DTNA	t	c	338	0.288	-+	0.7735	0.914133
	Hippocampal_Volume	Cross-Sectional	rs79922046	18	34485536	DTNA	a	g	338	0.601	++	0.5479	0.914133
	Hippocampal_Volume	Cross-Sectional	rs9955950	18	34485672	DTNA	t	c	338	0.627	++	0.5309	0.914133
	Hippocampal_Volume	Cross-Sectional	rs12957028	18	34485948	DTNA	a	g	338	-0.577	-+	0.564	0.914133
	Hippocampal_Volume	Cross-Sectional	rs72639491	18	34491438	DTNA	a	g	338	0.296	-+	0.767	0.914133
	Hippocampal_Volume	Cross-Sectional	rs62097347	18	34492032	DTNA	c	g	338	-1.392	--	0.1638	0.914133
	Hippocampal_Volume	Cross-Sectional	rs9961251	18	34492344	DTNA	t	c	338	0.641	-+	0.5216	0.914133
	Hippocampal_Volume	Cross-Sectional	rs111846993	18	34494001	DTNA	t	c	338	-1.117	-+	0.2641	0.914133
	Hippocampal_Volume	Cross-Sectional	rs4799769	18	34494577	DTNA	c	g	338	-0.02	-+	0.9838	0.9883
	Hippocampal_Volume	Cross-Sectional	rs8092794	18	34496273	DTNA	a	g	338	-1.013	+-	0.3109	0.914133
	Hippocampal_Volume	Cross-Sectional	rs7243528	18	34497055	DTNA	t	c	338	-1.83	--	0.06727	0.914133
	Hippocampal_Volume	Cross-Sectional	rs79972565	18	34497194	DTNA	t	g	338	-1.738	--	0.08218	0.914133
	Hippocampal_Volume	Cross-Sectional	rs35839923	18	34497764	DTNA	a	g	338	0.374	++	0.7086	0.914133
	Hippocampal_Volume	Cross-Sectional	rs62097349	18	34499519	DTNA	a	g	338	1.333	++	0.1826	0.914133
	Hippocampal_Volume	Cross-Sectional	rs9965622	18	34502153	DTNA	t	c	338	-2.034	+-	0.04195	0.914133
	Hippocampal_Volume	Cross-Sectional	rs62098462	18	34504364	DTNA	t	c	338	1.258	++	0.2082	0.914133
	Hippocampal_Volume	Cross-Sectional	rs75127284	18	34506592	DTNA	a	c	338	0.285	-+	0.7753	0.914133
	Hippocampal_Volume	Cross-Sectional	rs2439861	18	34507940	DTNA	a	g	338	-0.61	+-	0.5421	0.914133
	Hippocampal_Volume	Cross-Sectional	rs35982920	18	34516411	DTNA	a	g	338	-0.412	--	0.6806	0.914133
	Hippocampal_Volume	Cross-Sectional	rs2509597	18	34528430	DTNA	a	t	338	-1.465	--	0.1429	0.914133
	Hippocampal_Volume	Cross-Sectional	rs71363449	18	34531997	DTNA	t	c	338	0.648	+-	0.5173	0.914133
	Hippocampal_Volume	Cross-Sectional	rs2439853	18	34533937	DTNA	a	g	338	0.601	+-	0.548	0.914133
	Hippocampal_Volume	Cross-Sectional	rs2439000	18	34536414	DTNA	c	g	338	-0.181	-+	0.8561	0.924166
	Hippocampal_Volume	Cross-Sectional	rs11875892	18	34544032	DTNA	a	g	338	-0.463	+-	0.6432	0.914133
	Hippocampal_Volume	Cross-Sectional	rs1967583	18	34544573	DTNA	t	c	338	0.17	-+	0.8653	0.924166
	Hippocampal_Volume	Cross-Sectional	rs28856895	18	34555507	DTNA	a	g	338	1.236	++	0.2165	0.914133
	Hippocampal_Volume	Cross-Sectional	rs77973497	18	34560529	DTNA	a	c	338	1.281	++	0.2001	0.914133
	Hippocampal_Volume	Cross-Sectional	rs2579796	18	34569243	DTNA	a	g	338	0.627	++	0.531	0.914133
	Hippocampal_Volume	Cross-Sectional	rs2579797	18	34571732	DTNA	t	g	338	0.164	+-	0.8697	0.924166
	Hippocampal_Volume	Cross-Sectional	rs2685557	18	34576782	DTNA	t	c	338	0.476	+-	0.6343	0.914133
	Hippocampal_Volume	Cross-Sectional	rs9958492	18	34577783	DTNA	t	c	338	0.767	++	0.4431	0.914133
	Hippocampal_Volume	Cross-Sectional	rs2579802	18	34579787	DTNA	a	c	338	-0.448	+-	0.6542	0.914133
	Hippocampal_Volume	Cross-Sectional	rs74920018	18	34607557	DTNA	a	t	338	1.042	++	0.2972	0.914133
	Hippocampal_Volume	Cross-Sectional	rs1439127	18	34607759	DTNA	a	t	338	0.414	++	0.6787	0.914133
	Hippocampal_Volume	Cross-Sectional	rs12327368	18	34611361	DTNA	a	g	338	0.978	++	0.3279	0.914133
	Hippocampal_Volume	Cross-Sectional	rs62097188	18	34611412	DTNA	a	g	338	1.07	+-	0.2847	0.914133
	Hippocampal_Volume	Cross-Sectional	rs9807153	18	34635520	DTNA	a	t	338	0.746	-+	0.4557	0.914133
	Hippocampal_Volume	Cross-Sectional	rs2730126	18	34635939	DTNA	a	c	338	0.278	+-	0.7812	0.914133
	Hippocampal_Volume	Cross-Sectional	rs1659526	18	34644451	DTNA	a	g	338	-0.267	--	0.7894	0.914133
	Hippocampal_Volume	Cross-Sectional	rs17642885	18	34649976	DTNA	t	c	338	-0.683	+-	0.4943	0.914133
	Hippocampal_Volume	Cross-Sectional	rs1240974	18	34650949	DTNA	t	c	338	0.101	-+	0.9193	0.954122
	Hippocampal_Volume	Cross-Sectional	rs55869511	18	34651262	DTNA	a	c	338	-1.112	--	0.2661	0.914133
	Hippocampal_Volume	Cross-Sectional	rs12955208	18	34656737	DTNA	a	g	338	0.922	-+	0.3565	0.914133
	Hippocampal_Volume	Cross-Sectional	rs72953203	18	34660068	DTNA	a	g	338	0.633	++	0.5265	0.914133
	Hippocampal_Volume	Cross-Sectional	rs9946070	18	34665505	DTNA	a	g	338	0.295	++	0.7681	0.914133
	Hippocampal_Volume	Cross-Sectional	rs72953211	18	34673381	DTNA	a	c	338	0.124	-+	0.9012	0.947914
	Hippocampal_Volume	Cross-Sectional	rs55971592	18	34697328	DTNA	a	g	338	-0.34	-+	0.7341	0.914133
	Hippocampal_Volume	Cross-Sectional	rs78837792	18	34703359	DTNA	t	c	338	-0.231	-+	0.8175	0.918012
	Hippocampal_Volume	Cross-Sectional	rs11663468	18	34707936	DTNA	t	c	338	0.015	+-	0.9883	0.9883
	Hippocampal_Volume	Cross-Sectional	rs12963825	18	34709484	DTNA	a	g	338	1.064	++	0.2871	0.914133
	Hippocampal_Volume	Cross-Sectional	rs1480432	18	34727166	DTNA	t	g	338	0.401	++	0.6886	0.914133
	Hippocampal_Volume	Cross-Sectional	rs45556134	18	34729425	DTNA	a	g	338	0.873	+-	0.3826	0.914133
	Hippocampal_Volume	Cross-Sectional	rs899828	18	34732688	DTNA	t	g	338	0.467	-+	0.6402	0.914133
	Hippocampal_Volume	Cross-Sectional	rs17556884	18	34736455	DTNA	t	c	338	-0.546	--	0.5851	0.914133
	Hippocampal_Volume	Cross-Sectional	rs1480428	18	34738732	DTNA	a	g	338	-0.319	-+	0.7494	0.914133
	Hippocampal_Volume	Cross-Sectional	rs12957349	18	34739291	DTNA	t	c	338	0.522	-+	0.6015	0.914133
	Hippocampal_Volume	Cross-Sectional	rs12608110	18	34752198	DTNA	a	g	338	0.342	+-	0.7321	0.914133
	Hippocampal_Volume	Cross-Sectional	rs7228547	18	34760039	DTNA	a	g	338	-0.407	--	0.6843	0.914133
	Hippocampal_Volume	Cross-Sectional	rs8099437	18	34761448	DTNA	t	g	338	-0.559	--	0.5761	0.914133
	Hippocampal_Volume	Cross-Sectional	rs72955132	18	34762382	DTNA	a	g	338	-0.554	--	0.5794	0.914133
	Hippocampal_Volume	Cross-Sectional	rs1817452	18	34776629	DTNA	t	c	338	1.092	-+	0.2748	0.914133
	Hippocampal_Volume	Cross-Sectional	rs56404226	18	34778060	DTNA	a	g	338	-0.752	-+	0.452	0.914133
	Hippocampal_Volume	Cross-Sectional	rs72955175	18	34779045	DTNA	a	t	338	-0.532	-+	0.5946	0.914133
	Hippocampal_Volume	Cross-Sectional	rs12608251	18	34782906	DTNA	t	g	338	0.616	-+	0.5382	0.914133
	Hippocampal_Volume	Cross-Sectional	rs76880720	18	34791141	DTNA	a	c	338	-0.847	+-	0.3967	0.914133
	Hippocampal_Volume	Cross-Sectional	rs9989533	18	34793909	DTNA	t	c	338	-0.393	+-	0.6943	0.914133
	Hippocampal_Volume	Cross-Sectional	rs79500711	18	34794379	DTNA	a	g	338	-0.341	+-	0.7328	0.914133
	Hippocampal_Volume	Cross-Sectional	rs138856611	18	34801684	DTNA	t	g	338	0.21	+-	0.834	0.924166
	Hippocampal_Volume	Cross-Sectional	rs62097226	18	34804223	DTNA	a	t	338	-0.197	-+	0.8435	0.924166
	Hippocampal_Volume	Cross-Sectional	rs4458079	18	34806161	DTNA	t	c	338	-0.594	--	0.5524	0.914133
	Hippocampal_Volume	Cross-Sectional	rs8086358	18	34813672	DTNA	t	g	338	0.427	++	0.6692	0.914133
	Hippocampal_Volume	Cross-Sectional	rs72963047	18	34818804	DTNA	a	c	338	-0.533	+-	0.5938	0.914133
	Hippocampal_Volume	Cross-Sectional	rs17557660	18	34831178	DTNA	a	t	338	1.313	++	0.1891	0.914133
	Hippocampal_Volume	Cross-Sectional	rs1790533	18	34831631	DTNA	a	g	338	1.015	++	0.31	0.914133
	Hippocampal_Volume	Cross-Sectional	rs4799782	18	34841123	DTNA	a	g	338	-0.325	-+	0.7455	0.914133
	Hippocampal_Volume	Cross-Sectional	rs1786604	18	34846264	DTNA	a	g	338	-0.56	-+	0.5757	0.914133
	Hippocampal_Volume	Cross-Sectional	rs7233779	18	34863262	DTNA	a	g	338	-0.253	-+	0.8007	0.914133
	Hippocampal_Volume	Cross-Sectional	rs644982	18	34869793	DTNA	a	g	338	0.496	-+	0.6197	0.914133
	Hippocampal_Volume	Cross-Sectional	rs11659517	18	34870978	DTNA	a	t	338	0.925	-+	0.355	0.914133
	Hippocampal_Volume	Cross-Sectional	rs524969	18	34872102	DTNA	a	t	338	-1.073	+-	0.2834	0.914133
	Hippocampal_Volume	Cross-Sectional	rs637914	18	34876135	DTNA	a	t	338	-1.336	+-	0.1815	0.914133
	Hippocampal_Volume	Cross-Sectional	rs9304141	18	34879143	DTNA	t	c	338	0.342	++	0.7322	0.914133
	Hippocampal_Volume	Cross-Sectional	rs2288085	18	34879740	DTNA	a	g	338	-0.601	--	0.548	0.914133
	Hippocampal_Volume	Cross-Sectional	rs17558116	18	34882719	DTNA	t	c	338	0.282	-+	0.7776	0.914133
	Hippocampal_Volume	Cross-Sectional	rs10502637	18	34890006	DTNA	t	c	338	0.445	-+	0.656	0.914133
	Hippocampal_Volume	Cross-Sectional	rs149163416	18	34898841	DTNA	a	g	338	0.736	++	0.4617	0.914133
	Hippocampal_Volume	Cross-Sectional	20:33413780	20	33413780	SNTA1	a	t	338	0.838	-+	0.4023	0.914133
	Hippocampal_Volume	Cross-Sectional	rs291683	20	33431611	SNTA1	t	c	338	0.312	++	0.7548	0.914133
	Hippocampal_Volume	Cross-Sectional	20:33433270	20	33433270	SNTA1	t	c	338	0.827	++	0.408	0.914133
	Hippocampal_Volume	Cross-Sectional	rs6141396	20	33436147	SNTA1	a	c	93	1.08	+?	0.2801	0.914133
	Hippocampal_Volume	Cross-Sectional	rs293721	20	33441633	SNTA1	t	c	338	-1.662	--	0.09659	0.914133
	Hippocampal_Volume	Longitudinal	rs111599092	3	49465346	DAG1	a	g	111	0.3	++	0.7642	0.986288
	Hippocampal_Volume	Longitudinal	rs73073015	3	49465733	DAG1	a	g	111	0.934	++	0.3502	0.986288
	Hippocampal_Volume	Longitudinal	rs7611164	3	49471395	DAG1	t	g	111	-0.778	+-	0.4366	0.986288
	Hippocampal_Volume	Longitudinal	rs1568661	3	49483525	DAG1	a	g	111	0.328	+-	0.7429	0.986288
	Hippocampal_Volume	Longitudinal	rs7374731	3	49495661	DAG1	c	g	111	1.078	-+	0.2808	0.986288
	Hippocampal_Volume	Longitudinal	rs73074811	3	49516098	DAG1	a	t	111	0.165	+-	0.8691	0.986288
	Hippocampal_Volume	Longitudinal	rs3870338	3	49519618	DAG1	a	g	111	0.328	+-	0.7429	0.986288
	Hippocampal_Volume	Longitudinal	rs55935606	3	49528072	DAG1	a	g	111	-2.024	--	0.04292	0.986288
	Hippocampal_Volume	Longitudinal	rs75153130	3	49530436	DAG1	a	c	111	0.778	-+	0.4366	0.986288
	Hippocampal_Volume	Longitudinal	rs13079082	3	49537375	DAG1	c	g	111	0.298	++	0.766	0.986288
	Hippocampal_Volume	Longitudinal	rs4052546	3	49538116	DAG1	c	g	111	-1.078	+-	0.2808	0.986288
	Hippocampal_Volume	Longitudinal	rs73074830	3	49539584	DAG1	a	c	111	-0.415	--	0.6781	0.986288
	Hippocampal_Volume	Longitudinal	rs114093899	3	49539955	DAG1	c	g	111	-0.005	+-	0.9959	0.9959
	Hippocampal_Volume	Longitudinal	rs9789109	18	26842291	AQP4	a	g	111	-0.805	--	0.421	0.986288
	Hippocampal_Volume	Longitudinal	rs10164026	18	26842362	AQP4	a	c	111	-0.231	--	0.8177	0.986288
	Hippocampal_Volume	Longitudinal	rs4800270	18	26844933	AQP4	t	g	111	-1.005	+-	0.3151	0.986288
	Hippocampal_Volume	Longitudinal	rs79668602	18	26845488	AQP4	a	g	111	-3.211	--	0.001322	0.181114
	Hippocampal_Volume	Longitudinal	rs12458416	18	26847267	AQP4	c	g	111	-0.527	-+	0.5983	0.986288
	Hippocampal_Volume	Longitudinal	rs12953446	18	26848521	AQP4	a	g	111	0.79	++	0.4298	0.986288
	Hippocampal_Volume	Longitudinal	rs67461489	18	26848876	AQP4	t	c	111	-0.613	--	0.5396	0.986288
	Hippocampal_Volume	Longitudinal	rs11661081	18	26850068	AQP4	a	c	111	0.963	+-	0.3357	0.986288
	Hippocampal_Volume	Longitudinal	rs3763043	18	26855854	AQP4	t	c	111	-2.771	--	0.005593	0.255414
	Hippocampal_Volume	Longitudinal	rs68006382	18	26856555	AQP4	a	g	111	2.812	++	0.004918	0.255414
	Hippocampal_Volume	Longitudinal	rs335930	18	26856961	AQP4	a	c	111	-0.203	--	0.8394	0.986288
	Hippocampal_Volume	Longitudinal	rs71353405	18	26857429	AQP4	t	c	111	0.835	++	0.4037	0.986288
	Hippocampal_Volume	Longitudinal	rs162009	18	26864250	AQP4	a	g	111	0.548	++	0.5838	0.986288
	Hippocampal_Volume	Longitudinal	rs4800773	18	26865017	AQP4	a	g	111	-0.102	+-	0.9186	0.988862
	Hippocampal_Volume	Longitudinal	rs3875089	18	26865469	AQP4	t	c	111	0.606	++	0.5446	0.986288
	Hippocampal_Volume	Longitudinal	rs72878787	18	26866517	AQP4	a	g	111	-1.174	--	0.2402	0.986288
	Hippocampal_Volume	Longitudinal	rs162006	18	26866570	AQP4	t	c	111	0.283	+-	0.7768	0.986288
	Hippocampal_Volume	Longitudinal	rs151244	18	26866755	AQP4	t	c	111	-1.051	--	0.2931	0.986288
	Hippocampal_Volume	Longitudinal	rs72878794	18	26866839	AQP4	t	c	111	-0.655	--	0.5128	0.986288
	Hippocampal_Volume	Longitudinal	rs9961118	18	26866901	AQP4	t	c	111	1.495	++	0.135	0.986288
	Hippocampal_Volume	Longitudinal	rs162004	18	26867972	AQP4	c	g	111	0.68	++	0.4962	0.986288
	Hippocampal_Volume	Longitudinal	rs72878799	18	26868165	AQP4	a	g	111	1.406	-+	0.1596	0.986288
	Hippocampal_Volume	Longitudinal	rs11662318	18	26869056	AQP4	t	c	111	-0.494	+-	0.6216	0.986288
	Hippocampal_Volume	Longitudinal	rs151246	18	26869139	AQP4	t	g	111	1.386	++	0.1657	0.986288
	Hippocampal_Volume	Longitudinal	rs491148	18	26869803	AQP4	a	g	111	1.415	++	0.1569	0.986288
	Hippocampal_Volume	Longitudinal	rs162002	18	26871015	AQP4	a	g	111	0.302	++	0.7628	0.986288
	Hippocampal_Volume	Longitudinal	rs162001	18	26871481	AQP4	a	c	111	1.113	++	0.2656	0.986288
	Hippocampal_Volume	Longitudinal	rs3865411	18	26871684	AQP4	a	g	111	-0.497	--	0.6193	0.986288
	Hippocampal_Volume	Longitudinal	rs162000	18	26872471	AQP4	a	c	111	0.635	-+	0.5256	0.986288
	Hippocampal_Volume	Longitudinal	rs12969503	18	26873564	AQP4	t	g	111	-0.86	--	0.3899	0.986288
	Hippocampal_Volume	Longitudinal	rs8094228	18	26873767	AQP4	t	c	111	1.194	++	0.2326	0.986288
	Hippocampal_Volume	Longitudinal	rs480647	18	26874290	AQP4	t	c	111	1.556	-+	0.1197	0.986288
	Hippocampal_Volume	Longitudinal	rs10502478	18	26874616	AQP4	a	c	111	0.529	-+	0.5965	0.986288
	Hippocampal_Volume	Longitudinal	rs7234562	18	34483685	DTNA	t	c	111	-0.251	-+	0.8019	0.986288
	Hippocampal_Volume	Longitudinal	rs79922046	18	34485536	DTNA	a	g	111	0.096	+-	0.9239	0.988862
	Hippocampal_Volume	Longitudinal	rs9955950	18	34485672	DTNA	t	c	111	-0.638	-+	0.5238	0.986288
	Hippocampal_Volume	Longitudinal	rs12957028	18	34485948	DTNA	a	g	111	-0.153	--	0.8783	0.986288
	Hippocampal_Volume	Longitudinal	rs72639491	18	34491438	DTNA	a	g	111	-1.06	-+	0.2893	0.986288
	Hippocampal_Volume	Longitudinal	rs62097347	18	34492032	DTNA	c	g	111	0.381	+-	0.7035	0.986288
	Hippocampal_Volume	Longitudinal	rs9961251	18	34492344	DTNA	t	c	111	0.162	+-	0.8713	0.986288
	Hippocampal_Volume	Longitudinal	rs111846993	18	34494001	DTNA	t	c	111	-0.17	-+	0.8651	0.986288
	Hippocampal_Volume	Longitudinal	rs4799769	18	34494577	DTNA	c	g	111	0.375	+-	0.7075	0.986288
	Hippocampal_Volume	Longitudinal	rs8092794	18	34496273	DTNA	a	g	111	-0.501	--	0.616	0.986288
	Hippocampal_Volume	Longitudinal	rs7243528	18	34497055	DTNA	t	c	111	0.497	+-	0.6192	0.986288
	Hippocampal_Volume	Longitudinal	rs79972565	18	34497194	DTNA	t	g	111	0.772	++	0.4404	0.986288
	Hippocampal_Volume	Longitudinal	rs35839923	18	34497764	DTNA	a	g	111	1.572	++	0.116	0.986288
	Hippocampal_Volume	Longitudinal	rs62097349	18	34499519	DTNA	a	g	111	0.824	++	0.41	0.986288
	Hippocampal_Volume	Longitudinal	rs9965622	18	34502153	DTNA	t	c	111	0.967	+-	0.3336	0.986288
	Hippocampal_Volume	Longitudinal	rs62098462	18	34504364	DTNA	t	c	111	-0.404	--	0.6859	0.986288
	Hippocampal_Volume	Longitudinal	rs75127284	18	34506592	DTNA	a	c	111	-0.878	--	0.3802	0.986288
	Hippocampal_Volume	Longitudinal	rs2439861	18	34507940	DTNA	a	g	111	0.584	+-	0.5591	0.986288
	Hippocampal_Volume	Longitudinal	rs35982920	18	34516411	DTNA	a	g	111	-1.626	--	0.104	0.986288
	Hippocampal_Volume	Longitudinal	rs2509597	18	34528430	DTNA	a	t	111	-1.235	--	0.2167	0.986288
	Hippocampal_Volume	Longitudinal	rs71363449	18	34531997	DTNA	t	c	111	1.519	++	0.1287	0.986288
	Hippocampal_Volume	Longitudinal	rs2439853	18	34533937	DTNA	a	g	111	1.262	++	0.2068	0.986288
	Hippocampal_Volume	Longitudinal	rs2439000	18	34536414	DTNA	c	g	111	0.065	+-	0.9482	0.994229
	Hippocampal_Volume	Longitudinal	rs11875892	18	34544032	DTNA	a	g	111	-1.092	--	0.2747	0.986288
	Hippocampal_Volume	Longitudinal	rs1967583	18	34544573	DTNA	t	c	111	0.033	+-	0.974	0.995806
	Hippocampal_Volume	Longitudinal	rs28856895	18	34555507	DTNA	a	g	111	1.123	++	0.2616	0.986288
	Hippocampal_Volume	Longitudinal	rs77973497	18	34560529	DTNA	a	c	111	0.653	-+	0.5139	0.986288
	Hippocampal_Volume	Longitudinal	rs2579796	18	34569243	DTNA	a	g	111	0.983	++	0.3256	0.986288
	Hippocampal_Volume	Longitudinal	rs2579797	18	34571732	DTNA	t	g	111	-0.065	-+	0.9482	0.994229
	Hippocampal_Volume	Longitudinal	rs2685557	18	34576782	DTNA	t	c	111	0.983	++	0.3256	0.986288
	Hippocampal_Volume	Longitudinal	rs9958492	18	34577783	DTNA	t	c	111	0.95	++	0.3423	0.986288
	Hippocampal_Volume	Longitudinal	rs2579802	18	34579787	DTNA	a	c	111	-0.137	+-	0.891	0.988862
	Hippocampal_Volume	Longitudinal	rs74920018	18	34607557	DTNA	a	t	111	0.408	-+	0.6835	0.986288
	Hippocampal_Volume	Longitudinal	rs1439127	18	34607759	DTNA	a	t	111	-2.078	--	0.03767	0.986288
	Hippocampal_Volume	Longitudinal	rs12327368	18	34611361	DTNA	a	g	111	0.95	++	0.3423	0.986288
	Hippocampal_Volume	Longitudinal	rs62097188	18	34611412	DTNA	a	g	111	0.005	-+	0.9957	0.9959
	Hippocampal_Volume	Longitudinal	rs9807153	18	34635520	DTNA	a	t	111	-1.081	--	0.2798	0.986288
	Hippocampal_Volume	Longitudinal	rs2730126	18	34635939	DTNA	a	c	111	0.625	+-	0.5318	0.986288
	Hippocampal_Volume	Longitudinal	rs1659526	18	34644451	DTNA	a	g	111	-0.882	--	0.3775	0.986288
	Hippocampal_Volume	Longitudinal	rs17642885	18	34649976	DTNA	t	c	111	1.008	-+	0.3137	0.986288
	Hippocampal_Volume	Longitudinal	rs1240974	18	34650949	DTNA	t	c	111	-0.277	-+	0.7816	0.986288
	Hippocampal_Volume	Longitudinal	rs55869511	18	34651262	DTNA	a	c	111	-0.05	-+	0.96	0.994229
	Hippocampal_Volume	Longitudinal	rs12955208	18	34656737	DTNA	a	g	111	0.269	-+	0.7883	0.986288
	Hippocampal_Volume	Longitudinal	rs72953203	18	34660068	DTNA	a	g	111	0.668	++	0.5041	0.986288
	Hippocampal_Volume	Longitudinal	rs9946070	18	34665505	DTNA	a	g	111	0.105	-+	0.9161	0.988862
	Hippocampal_Volume	Longitudinal	rs72953211	18	34673381	DTNA	a	c	111	0.377	+-	0.7061	0.986288
	Hippocampal_Volume	Longitudinal	rs55971592	18	34697328	DTNA	a	g	111	-0.522	--	0.602	0.986288
	Hippocampal_Volume	Longitudinal	rs78837792	18	34703359	DTNA	t	c	111	-1.479	--	0.139	0.986288
	Hippocampal_Volume	Longitudinal	rs11663468	18	34707936	DTNA	t	c	111	-0.322	-+	0.7473	0.986288
	Hippocampal_Volume	Longitudinal	rs12963825	18	34709484	DTNA	a	g	111	0.828	++	0.4076	0.986288
	Hippocampal_Volume	Longitudinal	rs1480432	18	34727166	DTNA	t	g	111	1.123	-+	0.2616	0.986288
	Hippocampal_Volume	Longitudinal	rs45556134	18	34729425	DTNA	a	g	111	0.166	-+	0.8684	0.986288
	Hippocampal_Volume	Longitudinal	rs899828	18	34732688	DTNA	t	g	111	1.175	++	0.2401	0.986288
	Hippocampal_Volume	Longitudinal	rs17556884	18	34736455	DTNA	t	c	111	-0.461	--	0.6445	0.986288
	Hippocampal_Volume	Longitudinal	rs1480428	18	34738732	DTNA	a	g	111	-0.407	+-	0.6843	0.986288
	Hippocampal_Volume	Longitudinal	rs12957349	18	34739291	DTNA	t	c	111	0.269	-+	0.7883	0.986288
	Hippocampal_Volume	Longitudinal	rs12608110	18	34752198	DTNA	a	g	111	-0.335	-+	0.7374	0.986288
	Hippocampal_Volume	Longitudinal	rs7228547	18	34760039	DTNA	a	g	111	0.322	+-	0.7473	0.986288
	Hippocampal_Volume	Longitudinal	rs8099437	18	34761448	DTNA	t	g	111	-0.407	+-	0.6843	0.986288
	Hippocampal_Volume	Longitudinal	rs72955132	18	34762382	DTNA	a	g	111	-0.461	--	0.6445	0.986288
	Hippocampal_Volume	Longitudinal	rs1817452	18	34776629	DTNA	t	c	111	0.044	-+	0.9652	0.994229
	Hippocampal_Volume	Longitudinal	rs56404226	18	34778060	DTNA	a	g	111	-0.022	+-	0.9828	0.9959
	Hippocampal_Volume	Longitudinal	rs72955175	18	34779045	DTNA	a	t	111	0.421	+-	0.6741	0.986288
	Hippocampal_Volume	Longitudinal	rs12608251	18	34782906	DTNA	t	g	111	-0.3	-+	0.764	0.986288
	Hippocampal_Volume	Longitudinal	rs76880720	18	34791141	DTNA	a	c	111	0.118	+-	0.906	0.988862
	Hippocampal_Volume	Longitudinal	rs9989533	18	34793909	DTNA	t	c	111	0.969	-+	0.3323	0.986288
	Hippocampal_Volume	Longitudinal	rs79500711	18	34794379	DTNA	a	g	111	1.327	++	0.1845	0.986288
	Hippocampal_Volume	Longitudinal	rs138856611	18	34801684	DTNA	t	g	111	0.941	++	0.3469	0.986288
	Hippocampal_Volume	Longitudinal	rs62097226	18	34804223	DTNA	a	t	111	0.458	+-	0.6467	0.986288
	Hippocampal_Volume	Longitudinal	rs4458079	18	34806161	DTNA	t	c	111	-0.122	+-	0.903	0.988862
	Hippocampal_Volume	Longitudinal	rs8086358	18	34813672	DTNA	t	g	111	-0.193	-+	0.8471	0.986288
	Hippocampal_Volume	Longitudinal	rs72963047	18	34818804	DTNA	a	c	111	-0.194	-+	0.8464	0.986288
	Hippocampal_Volume	Longitudinal	rs17557660	18	34831178	DTNA	a	t	111	1.056	++	0.291	0.986288
	Hippocampal_Volume	Longitudinal	rs1790533	18	34831631	DTNA	a	g	111	-0.165	-+	0.8693	0.986288
	Hippocampal_Volume	Longitudinal	rs4799782	18	34841123	DTNA	a	g	111	-1.136	--	0.2559	0.986288
	Hippocampal_Volume	Longitudinal	rs1786604	18	34846264	DTNA	a	g	111	0.354	+-	0.7233	0.986288
	Hippocampal_Volume	Longitudinal	rs7233779	18	34863262	DTNA	a	g	111	-1.267	--	0.2053	0.986288
	Hippocampal_Volume	Longitudinal	rs644982	18	34869793	DTNA	a	g	111	-0.43	--	0.6673	0.986288
	Hippocampal_Volume	Longitudinal	rs11659517	18	34870978	DTNA	a	t	111	-0.288	-+	0.7735	0.986288
	Hippocampal_Volume	Longitudinal	rs524969	18	34872102	DTNA	a	t	111	0.183	+-	0.8546	0.986288
	Hippocampal_Volume	Longitudinal	rs637914	18	34876135	DTNA	a	t	111	0.701	+-	0.4835	0.986288
	Hippocampal_Volume	Longitudinal	rs9304141	18	34879143	DTNA	t	c	111	1.449	-+	0.1473	0.986288
	Hippocampal_Volume	Longitudinal	rs2288085	18	34879740	DTNA	a	g	111	0.061	-+	0.9511	0.994229
	Hippocampal_Volume	Longitudinal	rs17558116	18	34882719	DTNA	t	c	111	0.243	++	0.8078	0.986288
	Hippocampal_Volume	Longitudinal	rs10502637	18	34890006	DTNA	t	c	111	0.315	+-	0.7525	0.986288
	Hippocampal_Volume	Longitudinal	rs149163416	18	34898841	DTNA	a	g	111	-0.588	+-	0.5565	0.986288
	Hippocampal_Volume	Longitudinal	20:33413780	20	33413780	SNTA1	a	t	111	0.589	+-	0.5559	0.986288
	Hippocampal_Volume	Longitudinal	rs291683	20	33431611	SNTA1	t	c	111	0.437	+-	0.6621	0.986288
	Hippocampal_Volume	Longitudinal	20:33433270	20	33433270	SNTA1	t	c	111	0.202	-+	0.8397	0.986288
	Hippocampal_Volume	Longitudinal	rs6141396	20	33436147	SNTA1	a	c	47	-0.71	-?	0.478	0.986288
	Hippocampal_Volume	Longitudinal	rs293721	20	33441633	SNTA1	t	c	111	0.35	++	0.7261	0.986288
	PACC	Cross-Sectional	rs111599092	3	49465346	DAG1	a	g	352	0.732	++	0.4643	0.926636
	PACC	Cross-Sectional	rs73073015	3	49465733	DAG1	a	g	352	-0.783	--	0.4338	0.926636
	PACC	Cross-Sectional	rs7611164	3	49471395	DAG1	t	g	352	-0.437	--	0.6621	0.971455
	PACC	Cross-Sectional	rs1568661	3	49483525	DAG1	a	g	352	-0.175	+-	0.8611	0.971455
	PACC	Cross-Sectional	rs7374731	3	49495661	DAG1	c	g	352	1.17	-+	0.2421	0.926636
	PACC	Cross-Sectional	rs73074811	3	49516098	DAG1	a	t	352	-0.296	+-	0.7673	0.971455
	PACC	Cross-Sectional	rs3870338	3	49519618	DAG1	a	g	352	-0.175	+-	0.8611	0.971455
	PACC	Cross-Sectional	rs55935606	3	49528072	DAG1	a	g	352	-0.383	+-	0.7021	0.971455
	PACC	Cross-Sectional	rs75153130	3	49530436	DAG1	a	c	352	0.437	++	0.6621	0.971455
	PACC	Cross-Sectional	rs13079082	3	49537375	DAG1	c	g	352	-0.864	-+	0.3877	0.926636
	PACC	Cross-Sectional	rs4052546	3	49538116	DAG1	c	g	352	-1.17	+-	0.2421	0.926636
	PACC	Cross-Sectional	rs73074830	3	49539584	DAG1	a	c	352	-0.88	--	0.3788	0.926636
	PACC	Cross-Sectional	rs114093899	3	49539955	DAG1	c	g	352	-0.097	-+	0.9229	0.971455
	PACC	Cross-Sectional	rs9789109	18	26842291	AQP4	a	g	352	-2.066	--	0.03884	0.696325
	PACC	Cross-Sectional	rs10164026	18	26842362	AQP4	a	c	352	-0.299	+-	0.765	0.971455
	PACC	Cross-Sectional	rs4800270	18	26844933	AQP4	t	g	352	-2.536	--	0.01122	0.696325
	PACC	Cross-Sectional	rs79668602	18	26845488	AQP4	a	g	352	-0.001	-+	0.9992	0.9992
	PACC	Cross-Sectional	rs12458416	18	26847267	AQP4	c	g	352	1.095	++	0.2734	0.926636
	PACC	Cross-Sectional	rs12953446	18	26848521	AQP4	a	g	352	-1.955	--	0.05064	0.696325
	PACC	Cross-Sectional	rs67461489	18	26848876	AQP4	t	c	352	-1.462	--	0.1438	0.845712
	PACC	Cross-Sectional	rs11661081	18	26850068	AQP4	a	c	352	1.031	++	0.3025	0.926636
	PACC	Cross-Sectional	rs3763043	18	26855854	AQP4	t	c	352	-0.755	-+	0.45	0.926636
	PACC	Cross-Sectional	rs68006382	18	26856555	AQP4	a	g	352	-0.166	+-	0.8678	0.971455
	PACC	Cross-Sectional	rs335930	18	26856961	AQP4	a	c	352	2.262	++	0.02371	0.696325
	PACC	Cross-Sectional	rs71353405	18	26857429	AQP4	t	c	352	0.493	+-	0.622	0.971455
	PACC	Cross-Sectional	rs162009	18	26864250	AQP4	a	g	352	-0.522	+-	0.6016	0.971455
	PACC	Cross-Sectional	rs4800773	18	26865017	AQP4	a	g	352	-0.435	+-	0.6634	0.971455
	PACC	Cross-Sectional	rs3875089	18	26865469	AQP4	t	c	352	-0.808	--	0.4194	0.926636
	PACC	Cross-Sectional	rs72878787	18	26866517	AQP4	a	g	352	-0.886	--	0.3757	0.926636
	PACC	Cross-Sectional	rs162006	18	26866570	AQP4	t	c	352	-2.32	--	0.02034	0.696325
	PACC	Cross-Sectional	rs151244	18	26866755	AQP4	t	c	352	-0.31	-+	0.7562	0.971455
	PACC	Cross-Sectional	rs72878794	18	26866839	AQP4	t	c	352	0.483	++	0.6288	0.971455
	PACC	Cross-Sectional	rs9961118	18	26866901	AQP4	t	c	352	0.552	++	0.5806	0.971455
	PACC	Cross-Sectional	rs162004	18	26867972	AQP4	c	g	352	1.419	++	0.1559	0.845712
	PACC	Cross-Sectional	rs72878799	18	26868165	AQP4	a	g	352	0.139	+-	0.8896	0.971455
	PACC	Cross-Sectional	rs11662318	18	26869056	AQP4	t	c	352	0.971	++	0.3315	0.926636
	PACC	Cross-Sectional	rs151246	18	26869139	AQP4	t	g	352	1.251	++	0.2109	0.926636
	PACC	Cross-Sectional	rs491148	18	26869803	AQP4	a	g	352	-0.126	-+	0.8994	0.971455
	PACC	Cross-Sectional	rs162002	18	26871015	AQP4	a	g	352	-1.007	--	0.3139	0.926636
	PACC	Cross-Sectional	rs162001	18	26871481	AQP4	a	c	352	0.158	++	0.8743	0.971455
	PACC	Cross-Sectional	rs3865411	18	26871684	AQP4	a	g	352	-0.229	--	0.8187	0.971455
	PACC	Cross-Sectional	rs162000	18	26872471	AQP4	a	c	352	-0.892	--	0.3723	0.926636
	PACC	Cross-Sectional	rs12969503	18	26873564	AQP4	t	g	352	-0.962	+-	0.3362	0.926636
	PACC	Cross-Sectional	rs8094228	18	26873767	AQP4	t	c	352	0.818	++	0.4135	0.926636
	PACC	Cross-Sectional	rs480647	18	26874290	AQP4	t	c	352	-0.909	--	0.3635	0.926636
	PACC	Cross-Sectional	rs10502478	18	26874616	AQP4	a	c	352	0.308	++	0.7581	0.971455
	PACC	Cross-Sectional	rs7234562	18	34483685	DTNA	t	c	352	-0.255	+-	0.799	0.971455
	PACC	Cross-Sectional	rs79922046	18	34485536	DTNA	a	g	352	-0.053	--	0.9578	0.979243
	PACC	Cross-Sectional	rs9955950	18	34485672	DTNA	t	c	352	1.031	+-	0.3027	0.926636
	PACC	Cross-Sectional	rs12957028	18	34485948	DTNA	a	g	352	-0.5	--	0.6172	0.971455
	PACC	Cross-Sectional	rs72639491	18	34491438	DTNA	a	g	352	-1.109	+-	0.2676	0.926636
	PACC	Cross-Sectional	rs62097347	18	34492032	DTNA	c	g	352	-1.421	--	0.1553	0.845712
	PACC	Cross-Sectional	rs9961251	18	34492344	DTNA	t	c	352	-0.091	-+	0.9277	0.971455
	PACC	Cross-Sectional	rs111846993	18	34494001	DTNA	t	c	352	-0.082	-+	0.9348	0.971455
	PACC	Cross-Sectional	rs4799769	18	34494577	DTNA	c	g	352	1.148	-+	0.2509	0.926636
	PACC	Cross-Sectional	rs8092794	18	34496273	DTNA	a	g	352	0.168	+-	0.8663	0.971455
	PACC	Cross-Sectional	rs7243528	18	34497055	DTNA	t	c	352	-1.526	-+	0.1269	0.845712
	PACC	Cross-Sectional	rs79972565	18	34497194	DTNA	t	g	352	-1.837	--	0.06622	0.696325
	PACC	Cross-Sectional	rs35839923	18	34497764	DTNA	a	g	352	0.816	-+	0.4144	0.926636
	PACC	Cross-Sectional	rs62097349	18	34499519	DTNA	a	g	352	0.728	-+	0.4667	0.926636
	PACC	Cross-Sectional	rs9965622	18	34502153	DTNA	t	c	352	-1.263	+-	0.2066	0.926636
	PACC	Cross-Sectional	rs62098462	18	34504364	DTNA	t	c	352	0.447	++	0.6551	0.971455
	PACC	Cross-Sectional	rs75127284	18	34506592	DTNA	a	c	352	1.774	++	0.07601	0.696325
	PACC	Cross-Sectional	rs2439861	18	34507940	DTNA	a	g	352	-1.416	--	0.1568	0.845712
	PACC	Cross-Sectional	rs35982920	18	34516411	DTNA	a	g	352	-0.665	+-	0.5059	0.971455
	PACC	Cross-Sectional	rs2509597	18	34528430	DTNA	a	t	352	-0.81	+-	0.4181	0.926636
	PACC	Cross-Sectional	rs71363449	18	34531997	DTNA	t	c	352	0.763	-+	0.4454	0.926636
	PACC	Cross-Sectional	rs2439853	18	34533937	DTNA	a	g	352	0.638	-+	0.5237	0.971455
	PACC	Cross-Sectional	rs2439000	18	34536414	DTNA	c	g	352	-0.269	--	0.7881	0.971455
	PACC	Cross-Sectional	rs11875892	18	34544032	DTNA	a	g	352	0.347	+-	0.7284	0.971455
	PACC	Cross-Sectional	rs1967583	18	34544573	DTNA	t	c	352	0.406	+-	0.685	0.971455
	PACC	Cross-Sectional	rs28856895	18	34555507	DTNA	a	g	352	0.961	++	0.3367	0.926636
	PACC	Cross-Sectional	rs77973497	18	34560529	DTNA	a	c	352	0.757	++	0.4491	0.926636
	PACC	Cross-Sectional	rs2579796	18	34569243	DTNA	a	g	352	0.737	-+	0.4611	0.926636
	PACC	Cross-Sectional	rs2579797	18	34571732	DTNA	t	g	352	0.444	++	0.6569	0.971455
	PACC	Cross-Sectional	rs2685557	18	34576782	DTNA	t	c	352	0.643	-+	0.5205	0.971455
	PACC	Cross-Sectional	rs9958492	18	34577783	DTNA	t	c	352	0.784	-+	0.433	0.926636
	PACC	Cross-Sectional	rs2579802	18	34579787	DTNA	a	c	352	-0.35	--	0.7264	0.971455
	PACC	Cross-Sectional	rs74920018	18	34607557	DTNA	a	t	352	1.077	++	0.2817	0.926636
	PACC	Cross-Sectional	rs1439127	18	34607759	DTNA	a	t	352	-0.297	-+	0.7667	0.971455
	PACC	Cross-Sectional	rs12327368	18	34611361	DTNA	a	g	352	0.922	-+	0.3564	0.926636
	PACC	Cross-Sectional	rs62097188	18	34611412	DTNA	a	g	352	2.079	++	0.0376	0.696325
	PACC	Cross-Sectional	rs9807153	18	34635520	DTNA	a	t	352	0.342	-+	0.7321	0.971455
	PACC	Cross-Sectional	rs2730126	18	34635939	DTNA	a	c	352	0.385	-+	0.7005	0.971455
	PACC	Cross-Sectional	rs1659526	18	34644451	DTNA	a	g	352	-0.018	+-	0.9853	0.992545
	PACC	Cross-Sectional	rs17642885	18	34649976	DTNA	t	c	352	-0.058	+-	0.9536	0.979243
	PACC	Cross-Sectional	rs1240974	18	34650949	DTNA	t	c	352	-0.566	+-	0.5715	0.971455
	PACC	Cross-Sectional	rs55869511	18	34651262	DTNA	a	c	352	-1.329	--	0.1838	0.926636
	PACC	Cross-Sectional	rs12955208	18	34656737	DTNA	a	g	352	0.154	+-	0.8778	0.971455
	PACC	Cross-Sectional	rs72953203	18	34660068	DTNA	a	g	352	0.372	-+	0.7095	0.971455
	PACC	Cross-Sectional	rs9946070	18	34665505	DTNA	a	g	352	1.415	++	0.1571	0.845712
	PACC	Cross-Sectional	rs72953211	18	34673381	DTNA	a	c	352	-0.282	-+	0.7778	0.971455
	PACC	Cross-Sectional	rs55971592	18	34697328	DTNA	a	g	352	-0.798	--	0.4247	0.926636
	PACC	Cross-Sectional	rs78837792	18	34703359	DTNA	t	c	352	-0.087	--	0.931	0.971455
	PACC	Cross-Sectional	rs11663468	18	34707936	DTNA	t	c	352	-0.362	+-	0.7173	0.971455
	PACC	Cross-Sectional	rs12963825	18	34709484	DTNA	a	g	352	1.986	++	0.04708	0.696325
	PACC	Cross-Sectional	rs1480432	18	34727166	DTNA	t	g	352	0.22	+-	0.8256	0.971455
	PACC	Cross-Sectional	rs45556134	18	34729425	DTNA	a	g	352	2.234	++	0.02546	0.696325
	PACC	Cross-Sectional	rs899828	18	34732688	DTNA	t	g	352	1.127	++	0.2599	0.926636
	PACC	Cross-Sectional	rs17556884	18	34736455	DTNA	t	c	352	-1.901	--	0.05728	0.696325
	PACC	Cross-Sectional	rs1480428	18	34738732	DTNA	a	g	352	-0.795	--	0.4268	0.926636
	PACC	Cross-Sectional	rs12957349	18	34739291	DTNA	t	c	352	-0.491	+-	0.6231	0.971455
	PACC	Cross-Sectional	rs12608110	18	34752198	DTNA	a	g	352	1.773	++	0.07624	0.696325
	PACC	Cross-Sectional	rs7228547	18	34760039	DTNA	a	g	352	0.298	-+	0.766	0.971455
	PACC	Cross-Sectional	rs8099437	18	34761448	DTNA	t	g	352	-0.864	--	0.3873	0.926636
	PACC	Cross-Sectional	rs72955132	18	34762382	DTNA	a	g	352	-1.847	--	0.0648	0.696325
	PACC	Cross-Sectional	rs1817452	18	34776629	DTNA	t	c	352	-0.175	+-	0.861	0.971455
	PACC	Cross-Sectional	rs56404226	18	34778060	DTNA	a	g	352	-1.419	--	0.1558	0.845712
	PACC	Cross-Sectional	rs72955175	18	34779045	DTNA	a	t	352	-0.248	-+	0.804	0.971455
	PACC	Cross-Sectional	rs12608251	18	34782906	DTNA	t	g	352	0.212	+-	0.8322	0.971455
	PACC	Cross-Sectional	rs76880720	18	34791141	DTNA	a	c	352	0.364	-+	0.7161	0.971455
	PACC	Cross-Sectional	rs9989533	18	34793909	DTNA	t	c	352	1.449	++	0.1475	0.845712
	PACC	Cross-Sectional	rs79500711	18	34794379	DTNA	a	g	352	0.504	++	0.6143	0.971455
	PACC	Cross-Sectional	rs138856611	18	34801684	DTNA	t	g	352	1.069	++	0.2849	0.926636
	PACC	Cross-Sectional	rs62097226	18	34804223	DTNA	a	t	352	-0.779	--	0.4362	0.926636
	PACC	Cross-Sectional	rs4458079	18	34806161	DTNA	t	c	352	-1.874	--	0.06091	0.696325
	PACC	Cross-Sectional	rs8086358	18	34813672	DTNA	t	g	352	-0.324	+-	0.7462	0.971455
	PACC	Cross-Sectional	rs72963047	18	34818804	DTNA	a	c	352	-0.877	+-	0.3806	0.926636
	PACC	Cross-Sectional	rs17557660	18	34831178	DTNA	a	t	352	1.403	++	0.1605	0.845712
	PACC	Cross-Sectional	rs1790533	18	34831631	DTNA	a	g	352	-0.139	+-	0.8891	0.971455
	PACC	Cross-Sectional	rs4799782	18	34841123	DTNA	a	g	352	-1.443	--	0.1491	0.845712
	PACC	Cross-Sectional	rs1786604	18	34846264	DTNA	a	g	352	-0.331	-+	0.7406	0.971455
	PACC	Cross-Sectional	rs7233779	18	34863262	DTNA	a	g	352	-0.759	+-	0.4479	0.926636
	PACC	Cross-Sectional	rs644982	18	34869793	DTNA	a	g	352	0.091	+-	0.9275	0.971455
	PACC	Cross-Sectional	rs11659517	18	34870978	DTNA	a	t	352	-0.222	+-	0.8242	0.971455
	PACC	Cross-Sectional	rs524969	18	34872102	DTNA	a	t	352	-0.08	-+	0.936	0.971455
	PACC	Cross-Sectional	rs637914	18	34876135	DTNA	a	t	352	0.519	-+	0.604	0.971455
	PACC	Cross-Sectional	rs9304141	18	34879143	DTNA	t	c	352	-0.555	--	0.5792	0.971455
	PACC	Cross-Sectional	rs2288085	18	34879740	DTNA	a	g	352	0.213	-+	0.831	0.971455
	PACC	Cross-Sectional	rs17558116	18	34882719	DTNA	t	c	352	-3.438	--	0.0005863	0.0803231
	PACC	Cross-Sectional	rs10502637	18	34890006	DTNA	t	c	352	0.995	++	0.3198	0.926636
	PACC	Cross-Sectional	rs149163416	18	34898841	DTNA	a	g	352	-0.274	+-	0.7839	0.971455
	PACC	Cross-Sectional	20:33413780	20	33413780	SNTA1	a	t	352	0.028	+-	0.9775	0.991981
	PACC	Cross-Sectional	rs291683	20	33431611	SNTA1	t	c	352	-1.553	--	0.1203	0.845712
	PACC	Cross-Sectional	20:33433270	20	33433270	SNTA1	t	c	352	1.046	++	0.2956	0.926636
	PACC	Cross-Sectional	rs6141396	20	33436147	SNTA1	a	c	106	0.667	+?	0.505	0.971455
	PACC	Cross-Sectional	rs293721	20	33441633	SNTA1	t	c	352	-0.273	-+	0.7848	0.971455
	PACC	Longitudinal	rs111599092	3	49465346	DAG1	a	g	265	-0.931	--	0.3518	0.758137
	PACC	Longitudinal	rs73073015	3	49465733	DAG1	a	g	265	1.327	++	0.1846	0.74381
	PACC	Longitudinal	rs7611164	3	49471395	DAG1	t	g	265	0.176	++	0.8602	0.954577
	PACC	Longitudinal	rs1568661	3	49483525	DAG1	a	g	265	1.232	++	0.2181	0.74381
	PACC	Longitudinal	rs7374731	3	49495661	DAG1	c	g	265	2.238	++	0.02519	0.74381
	PACC	Longitudinal	rs73074811	3	49516098	DAG1	a	t	265	-1.431	--	0.1525	0.74381
	PACC	Longitudinal	rs3870338	3	49519618	DAG1	a	g	265	1.232	++	0.2181	0.74381
	PACC	Longitudinal	rs55935606	3	49528072	DAG1	a	g	265	-1.259	--	0.2079	0.74381
	PACC	Longitudinal	rs75153130	3	49530436	DAG1	a	c	265	-0.176	--	0.8602	0.954577
	PACC	Longitudinal	rs13079082	3	49537375	DAG1	c	g	265	0.916	++	0.3597	0.758137
	PACC	Longitudinal	rs4052546	3	49538116	DAG1	c	g	265	-2.238	--	0.02519	0.74381
	PACC	Longitudinal	rs73074830	3	49539584	DAG1	a	c	265	1.791	++	0.07328	0.74381
	PACC	Longitudinal	rs114093899	3	49539955	DAG1	c	g	265	0.994	++	0.3201	0.758137
	PACC	Longitudinal	rs9789109	18	26842291	AQP4	a	g	265	1.561	++	0.1184	0.74381
	PACC	Longitudinal	rs10164026	18	26842362	AQP4	a	c	265	0.288	-+	0.7734	0.954577
	PACC	Longitudinal	rs4800270	18	26844933	AQP4	t	g	265	2.161	++	0.03071	0.74381
	PACC	Longitudinal	rs79668602	18	26845488	AQP4	a	g	265	0.044	-+	0.9651	0.979398
	PACC	Longitudinal	rs12458416	18	26847267	AQP4	c	g	265	0.698	-+	0.4853	0.863456
	PACC	Longitudinal	rs12953446	18	26848521	AQP4	a	g	265	1.016	-+	0.3094	0.758137
	PACC	Longitudinal	rs67461489	18	26848876	AQP4	t	c	265	-1.101	+-	0.271	0.758137
	PACC	Longitudinal	rs11661081	18	26850068	AQP4	a	c	265	-1.256	--	0.2091	0.74381
	PACC	Longitudinal	rs3763043	18	26855854	AQP4	t	c	265	-0.968	+-	0.3332	0.758137
	PACC	Longitudinal	rs68006382	18	26856555	AQP4	a	g	265	0.844	-+	0.3986	0.780117
	PACC	Longitudinal	rs335930	18	26856961	AQP4	a	c	265	-1.296	+-	0.1951	0.74381
	PACC	Longitudinal	rs71353405	18	26857429	AQP4	t	c	265	0.874	-+	0.3821	0.772561
	PACC	Longitudinal	rs162009	18	26864250	AQP4	a	g	265	1.846	-+	0.06493	0.74381
	PACC	Longitudinal	rs4800773	18	26865017	AQP4	a	g	265	0.128	-+	0.8978	0.957619
	PACC	Longitudinal	rs3875089	18	26865469	AQP4	t	c	265	-1.691	+-	0.09079	0.74381
	PACC	Longitudinal	rs72878787	18	26866517	AQP4	a	g	265	2.023	++	0.04312	0.74381
	PACC	Longitudinal	rs162006	18	26866570	AQP4	t	c	265	1.873	-+	0.06108	0.74381
	PACC	Longitudinal	rs151244	18	26866755	AQP4	t	c	265	-1.886	--	0.05925	0.74381
	PACC	Longitudinal	rs72878794	18	26866839	AQP4	t	c	265	1.468	++	0.1422	0.74381
	PACC	Longitudinal	rs9961118	18	26866901	AQP4	t	c	265	-1.52	--	0.1285	0.74381
	PACC	Longitudinal	rs162004	18	26867972	AQP4	c	g	265	-0.347	--	0.7283	0.94442
	PACC	Longitudinal	rs72878799	18	26868165	AQP4	a	g	265	-0.865	--	0.3869	0.772561
	PACC	Longitudinal	rs11662318	18	26869056	AQP4	t	c	265	0.647	-+	0.5178	0.909469
	PACC	Longitudinal	rs151246	18	26869139	AQP4	t	g	265	-1.144	+-	0.2526	0.758137
	PACC	Longitudinal	rs491148	18	26869803	AQP4	a	g	265	-1.252	+-	0.2106	0.74381
	PACC	Longitudinal	rs162002	18	26871015	AQP4	a	g	265	-1.634	+-	0.1022	0.74381
	PACC	Longitudinal	rs162001	18	26871481	AQP4	a	c	265	1.164	-+	0.2443	0.758137
	PACC	Longitudinal	rs3865411	18	26871684	AQP4	a	g	265	-2.18	--	0.02926	0.74381
	PACC	Longitudinal	rs162000	18	26872471	AQP4	a	c	265	-1.148	--	0.2508	0.758137
	PACC	Longitudinal	rs12969503	18	26873564	AQP4	t	g	265	0.317	-+	0.7511	0.94442
	PACC	Longitudinal	rs8094228	18	26873767	AQP4	t	c	265	0.195	+-	0.8455	0.954577
	PACC	Longitudinal	rs480647	18	26874290	AQP4	t	c	265	-0.22	+-	0.8256	0.954577
	PACC	Longitudinal	rs10502478	18	26874616	AQP4	a	c	265	1.12	-+	0.2626	0.758137
	PACC	Longitudinal	rs7234562	18	34483685	DTNA	t	c	265	-0.377	-+	0.7063	0.94442
	PACC	Longitudinal	rs79922046	18	34485536	DTNA	a	g	265	0.356	+-	0.7215	0.94442
	PACC	Longitudinal	rs9955950	18	34485672	DTNA	t	c	265	1.334	-+	0.1822	0.74381
	PACC	Longitudinal	rs12957028	18	34485948	DTNA	a	g	265	-0.36	-+	0.7189	0.94442
	PACC	Longitudinal	rs72639491	18	34491438	DTNA	a	g	265	-0.506	-+	0.6127	0.94442
	PACC	Longitudinal	rs62097347	18	34492032	DTNA	c	g	265	-0.192	+-	0.8474	0.954577
	PACC	Longitudinal	rs9961251	18	34492344	DTNA	t	c	265	-1.935	--	0.05299	0.74381
	PACC	Longitudinal	rs111846993	18	34494001	DTNA	t	c	265	-0.464	--	0.6429	0.94442
	PACC	Longitudinal	rs4799769	18	34494577	DTNA	c	g	265	1.742	++	0.08151	0.74381
	PACC	Longitudinal	rs8092794	18	34496273	DTNA	a	g	265	-0.327	-+	0.7437	0.94442
	PACC	Longitudinal	rs7243528	18	34497055	DTNA	t	c	265	0.048	-+	0.962	0.979398
	PACC	Longitudinal	rs79972565	18	34497194	DTNA	t	g	265	-0.105	--	0.9163	0.965639
	PACC	Longitudinal	rs35839923	18	34497764	DTNA	a	g	265	0.82	++	0.4125	0.795951
	PACC	Longitudinal	rs62097349	18	34499519	DTNA	a	g	265	2.046	++	0.04071	0.74381
	PACC	Longitudinal	rs9965622	18	34502153	DTNA	t	c	265	-0.61	--	0.5419	0.916062
	PACC	Longitudinal	rs62098462	18	34504364	DTNA	t	c	265	1.577	++	0.1148	0.74381
	PACC	Longitudinal	rs75127284	18	34506592	DTNA	a	c	265	-0.123	--	0.9017	0.957619
	PACC	Longitudinal	rs2439861	18	34507940	DTNA	a	g	265	0.868	++	0.3856	0.772561
	PACC	Longitudinal	rs35982920	18	34516411	DTNA	a	g	265	-1.375	--	0.1693	0.74381
	PACC	Longitudinal	rs2509597	18	34528430	DTNA	a	t	265	-0.98	+-	0.3273	0.758137
	PACC	Longitudinal	rs71363449	18	34531997	DTNA	t	c	265	-0.709	-+	0.4784	0.863456
	PACC	Longitudinal	rs2439853	18	34533937	DTNA	a	g	265	-1.386	--	0.1659	0.74381
	PACC	Longitudinal	rs2439000	18	34536414	DTNA	c	g	265	0.947	++	0.3437	0.758137
	PACC	Longitudinal	rs11875892	18	34544032	DTNA	a	g	265	-1.54	--	0.1235	0.74381
	PACC	Longitudinal	rs1967583	18	34544573	DTNA	t	c	265	0.441	++	0.6592	0.94442
	PACC	Longitudinal	rs28856895	18	34555507	DTNA	a	g	265	-0.333	-+	0.7393	0.94442
	PACC	Longitudinal	rs77973497	18	34560529	DTNA	a	c	265	1.273	-+	0.203	0.74381
	PACC	Longitudinal	rs2579796	18	34569243	DTNA	a	g	265	-1.498	--	0.134	0.74381
	PACC	Longitudinal	rs2579797	18	34571732	DTNA	t	g	265	-1.011	--	0.3122	0.758137
	PACC	Longitudinal	rs2685557	18	34576782	DTNA	t	c	265	-1.374	--	0.1693	0.74381
	PACC	Longitudinal	rs9958492	18	34577783	DTNA	t	c	265	-0.861	-+	0.3891	0.772561
	PACC	Longitudinal	rs2579802	18	34579787	DTNA	a	c	265	-0.943	--	0.3459	0.758137
	PACC	Longitudinal	rs74920018	18	34607557	DTNA	a	t	265	1.042	-+	0.2975	0.758137
	PACC	Longitudinal	rs1439127	18	34607759	DTNA	a	t	265	0.547	+-	0.5843	0.94442
	PACC	Longitudinal	rs12327368	18	34611361	DTNA	a	g	265	-1.027	--	0.3045	0.758137
	PACC	Longitudinal	rs62097188	18	34611412	DTNA	a	g	265	0.787	++	0.4312	0.820478
	PACC	Longitudinal	rs9807153	18	34635520	DTNA	a	t	265	-1.11	+-	0.2669	0.758137
	PACC	Longitudinal	rs2730126	18	34635939	DTNA	a	c	265	-1.22	--	0.2226	0.74381
	PACC	Longitudinal	rs1659526	18	34644451	DTNA	a	g	265	-1.025	--	0.3052	0.758137
	PACC	Longitudinal	rs17642885	18	34649976	DTNA	t	c	265	-0.921	--	0.3571	0.758137
	PACC	Longitudinal	rs1240974	18	34650949	DTNA	t	c	265	-1	--	0.3173	0.758137
	PACC	Longitudinal	rs55869511	18	34651262	DTNA	a	c	265	0.151	+-	0.88	0.954577
	PACC	Longitudinal	rs12955208	18	34656737	DTNA	a	g	265	0.761	++	0.4467	0.837366
	PACC	Longitudinal	rs72953203	18	34660068	DTNA	a	g	265	-0.153	+-	0.878	0.954577
	PACC	Longitudinal	rs9946070	18	34665505	DTNA	a	g	265	0.051	-+	0.9595	0.979398
	PACC	Longitudinal	rs72953211	18	34673381	DTNA	a	c	265	0.183	-+	0.855	0.954577
	PACC	Longitudinal	rs55971592	18	34697328	DTNA	a	g	265	0.698	++	0.4849	0.863456
	PACC	Longitudinal	rs78837792	18	34703359	DTNA	t	c	265	0.159	+-	0.8741	0.954577
	PACC	Longitudinal	rs11663468	18	34707936	DTNA	t	c	265	-0.417	-+	0.677	0.94442
	PACC	Longitudinal	rs12963825	18	34709484	DTNA	a	g	265	-0.158	-+	0.8741	0.954577
	PACC	Longitudinal	rs1480432	18	34727166	DTNA	t	g	265	-0.145	-+	0.8845	0.954577
	PACC	Longitudinal	rs45556134	18	34729425	DTNA	a	g	265	0.008	+-	0.9938	0.9994
	PACC	Longitudinal	rs899828	18	34732688	DTNA	t	g	265	-0.345	+-	0.7302	0.94442
	PACC	Longitudinal	rs17556884	18	34736455	DTNA	t	c	265	0.317	+-	0.7514	0.94442
	PACC	Longitudinal	rs1480428	18	34738732	DTNA	a	g	265	0.6	+-	0.5483	0.916062
	PACC	Longitudinal	rs12957349	18	34739291	DTNA	t	c	265	1.237	++	0.2162	0.74381
	PACC	Longitudinal	rs12608110	18	34752198	DTNA	a	g	265	0.001	+-	0.9994	0.9994
	PACC	Longitudinal	rs7228547	18	34760039	DTNA	a	g	265	0.492	+-	0.6227	0.94442
	PACC	Longitudinal	rs8099437	18	34761448	DTNA	t	g	265	0.618	+-	0.5365	0.916062
	PACC	Longitudinal	rs72955132	18	34762382	DTNA	a	g	265	0.317	+-	0.7514	0.94442
	PACC	Longitudinal	rs1817452	18	34776629	DTNA	t	c	265	1.556	++	0.1197	0.74381
	PACC	Longitudinal	rs56404226	18	34778060	DTNA	a	g	265	0.94	-+	0.3474	0.758137
	PACC	Longitudinal	rs72955175	18	34779045	DTNA	a	t	265	0.452	+-	0.6514	0.94442
	PACC	Longitudinal	rs12608251	18	34782906	DTNA	t	g	265	-0.152	-+	0.879	0.954577
	PACC	Longitudinal	rs76880720	18	34791141	DTNA	a	c	265	-1.392	--	0.1639	0.74381
	PACC	Longitudinal	rs9989533	18	34793909	DTNA	t	c	265	-0.355	+-	0.7224	0.94442
	PACC	Longitudinal	rs79500711	18	34794379	DTNA	a	g	265	-0.416	-+	0.6775	0.94442
	PACC	Longitudinal	rs138856611	18	34801684	DTNA	t	g	265	0.145	+-	0.8849	0.954577
	PACC	Longitudinal	rs62097226	18	34804223	DTNA	a	t	265	0.752	-+	0.4523	0.837366
	PACC	Longitudinal	rs4458079	18	34806161	DTNA	t	c	265	0.328	++	0.7432	0.94442
	PACC	Longitudinal	rs8086358	18	34813672	DTNA	t	g	265	-0.159	-+	0.8738	0.954577
	PACC	Longitudinal	rs72963047	18	34818804	DTNA	a	c	265	0.335	-+	0.7375	0.94442
	PACC	Longitudinal	rs17557660	18	34831178	DTNA	a	t	265	-0.325	+-	0.7448	0.94442
	PACC	Longitudinal	rs1790533	18	34831631	DTNA	a	g	265	0.09	-+	0.928	0.970504
	PACC	Longitudinal	rs4799782	18	34841123	DTNA	a	g	265	-0.612	-+	0.5404	0.916062
	PACC	Longitudinal	rs1786604	18	34846264	DTNA	a	g	265	0.364	+-	0.7157	0.94442
	PACC	Longitudinal	rs7233779	18	34863262	DTNA	a	g	265	-0.367	+-	0.7139	0.94442
	PACC	Longitudinal	rs644982	18	34869793	DTNA	a	g	265	0.237	-+	0.813	0.954577
	PACC	Longitudinal	rs11659517	18	34870978	DTNA	a	t	265	1.002	++	0.3164	0.758137
	PACC	Longitudinal	rs524969	18	34872102	DTNA	a	t	265	-0.218	--	0.8276	0.954577
	PACC	Longitudinal	rs637914	18	34876135	DTNA	a	t	265	0.057	+-	0.9544	0.979398
	PACC	Longitudinal	rs9304141	18	34879143	DTNA	t	c	265	1.815	-+	0.06953	0.74381
	PACC	Longitudinal	rs2288085	18	34879740	DTNA	a	g	265	0.232	-+	0.8169	0.954577
	PACC	Longitudinal	rs17558116	18	34882719	DTNA	t	c	265	1.149	++	0.2507	0.758137
	PACC	Longitudinal	rs10502637	18	34890006	DTNA	t	c	265	-1.073	--	0.2835	0.758137
	PACC	Longitudinal	rs149163416	18	34898841	DTNA	a	g	265	-1.336	+-	0.1815	0.74381
	PACC	Longitudinal	20:33413780	20	33413780	SNTA1	a	t	265	-1.292	--	0.1962	0.74381
	PACC	Longitudinal	rs291683	20	33431611	SNTA1	t	c	265	-0.473	--	0.6359	0.94442
	PACC	Longitudinal	20:33433270	20	33433270	SNTA1	t	c	265	-0.339	+-	0.7344	0.94442
	PACC	Longitudinal	rs6141396	20	33436147	SNTA1	a	c	71	1.489	+?	0.1364	0.74381
	PACC	Longitudinal	rs293721	20	33441633	SNTA1	t	c	265	0.576	-+	0.5647	0.932095
	Ventricular_Volume	Cross-Sectional	rs111599092	3	49465346	DAG1	a	g	338	-0.078	+-	0.9381	0.9876
	Ventricular_Volume	Cross-Sectional	rs73073015	3	49465733	DAG1	a	g	338	0.067	+-	0.9469	0.9876
	Ventricular_Volume	Cross-Sectional	rs7611164	3	49471395	DAG1	t	g	338	-1.193	--	0.2327	0.865263
	Ventricular_Volume	Cross-Sectional	rs1568661	3	49483525	DAG1	a	g	338	-1.09	--	0.2757	0.921241
	Ventricular_Volume	Cross-Sectional	rs7374731	3	49495661	DAG1	c	g	338	-1.45	--	0.147	0.865263
	Ventricular_Volume	Cross-Sectional	rs73074811	3	49516098	DAG1	a	t	338	1.894	++	0.05816	0.865263
	Ventricular_Volume	Cross-Sectional	rs3870338	3	49519618	DAG1	a	g	338	-1.09	--	0.2757	0.921241
	Ventricular_Volume	Cross-Sectional	rs55935606	3	49528072	DAG1	a	g	338	1.458	++	0.1449	0.865263
	Ventricular_Volume	Cross-Sectional	rs75153130	3	49530436	DAG1	a	c	338	1.193	++	0.2327	0.865263
	Ventricular_Volume	Cross-Sectional	rs13079082	3	49537375	DAG1	c	g	338	-1.432	--	0.1521	0.865263
	Ventricular_Volume	Cross-Sectional	rs4052546	3	49538116	DAG1	c	g	338	1.45	++	0.147	0.865263
	Ventricular_Volume	Cross-Sectional	rs73074830	3	49539584	DAG1	a	c	338	-0.882	--	0.3777	0.942126
	Ventricular_Volume	Cross-Sectional	rs114093899	3	49539955	DAG1	c	g	338	0.421	++	0.6738	0.961569
	Ventricular_Volume	Cross-Sectional	rs9789109	18	26842291	AQP4	a	g	338	0.743	++	0.4573	0.942126
	Ventricular_Volume	Cross-Sectional	rs10164026	18	26842362	AQP4	a	c	338	-2.492	--	0.0127	0.579967
	Ventricular_Volume	Cross-Sectional	rs4800270	18	26844933	AQP4	t	g	338	0.423	++	0.6726	0.961569
	Ventricular_Volume	Cross-Sectional	rs79668602	18	26845488	AQP4	a	g	338	-0.768	--	0.4425	0.942126
	Ventricular_Volume	Cross-Sectional	rs12458416	18	26847267	AQP4	c	g	338	-2.663	--	0.007744	0.579967
	Ventricular_Volume	Cross-Sectional	rs12953446	18	26848521	AQP4	a	g	338	0.466	+-	0.6411	0.958417
	Ventricular_Volume	Cross-Sectional	rs67461489	18	26848876	AQP4	t	c	338	1.691	++	0.09087	0.865263
	Ventricular_Volume	Cross-Sectional	rs11661081	18	26850068	AQP4	a	c	338	0.777	+-	0.4369	0.942126
	Ventricular_Volume	Cross-Sectional	rs3763043	18	26855854	AQP4	t	c	338	2.532	++	0.01134	0.579967
	Ventricular_Volume	Cross-Sectional	rs68006382	18	26856555	AQP4	a	g	338	-0.586	--	0.558	0.942126
	Ventricular_Volume	Cross-Sectional	rs335930	18	26856961	AQP4	a	c	338	-0.282	-+	0.7779	0.975962
	Ventricular_Volume	Cross-Sectional	rs71353405	18	26857429	AQP4	t	c	338	-0.309	-+	0.7571	0.975962
	Ventricular_Volume	Cross-Sectional	rs162009	18	26864250	AQP4	a	g	338	-1.175	--	0.24	0.865263
	Ventricular_Volume	Cross-Sectional	rs4800773	18	26865017	AQP4	a	g	338	-0.233	-+	0.8158	0.975962
	Ventricular_Volume	Cross-Sectional	rs3875089	18	26865469	AQP4	t	c	338	0.674	+-	0.5003	0.942126
	Ventricular_Volume	Cross-Sectional	rs72878787	18	26866517	AQP4	a	g	338	-1.62	--	0.1051	0.865263
	Ventricular_Volume	Cross-Sectional	rs162006	18	26866570	AQP4	t	c	338	0.539	++	0.5898	0.946893
	Ventricular_Volume	Cross-Sectional	rs151244	18	26866755	AQP4	t	c	338	0.628	-+	0.5301	0.942126
	Ventricular_Volume	Cross-Sectional	rs72878794	18	26866839	AQP4	t	c	338	-0.129	-+	0.8976	0.975962
	Ventricular_Volume	Cross-Sectional	rs9961118	18	26866901	AQP4	t	c	338	-1.011	+-	0.3119	0.94159
	Ventricular_Volume	Cross-Sectional	rs162004	18	26867972	AQP4	c	g	338	-0.595	--	0.552	0.942126
	Ventricular_Volume	Cross-Sectional	rs72878799	18	26868165	AQP4	a	g	338	0.26	+-	0.7952	0.975962
	Ventricular_Volume	Cross-Sectional	rs11662318	18	26869056	AQP4	t	c	338	-0.037	+-	0.9706	0.9876
	Ventricular_Volume	Cross-Sectional	rs151246	18	26869139	AQP4	t	g	338	-0.49	-+	0.6242	0.950171
	Ventricular_Volume	Cross-Sectional	rs491148	18	26869803	AQP4	a	g	338	-0.879	--	0.3794	0.942126
	Ventricular_Volume	Cross-Sectional	rs162002	18	26871015	AQP4	a	g	338	-0.85	--	0.3953	0.942126
	Ventricular_Volume	Cross-Sectional	rs162001	18	26871481	AQP4	a	c	338	0.016	+-	0.9876	0.9876
	Ventricular_Volume	Cross-Sectional	rs3865411	18	26871684	AQP4	a	g	338	0.185	+-	0.853	0.975962
	Ventricular_Volume	Cross-Sectional	rs162000	18	26872471	AQP4	a	c	338	-0.116	+-	0.9074	0.978849
	Ventricular_Volume	Cross-Sectional	rs12969503	18	26873564	AQP4	t	g	338	-0.678	-+	0.4979	0.942126
	Ventricular_Volume	Cross-Sectional	rs8094228	18	26873767	AQP4	t	c	338	0.577	+-	0.5639	0.942126
	Ventricular_Volume	Cross-Sectional	rs480647	18	26874290	AQP4	t	c	338	-0.316	-+	0.7517	0.975962
	Ventricular_Volume	Cross-Sectional	rs10502478	18	26874616	AQP4	a	c	338	0.498	+-	0.6183	0.950171
	Ventricular_Volume	Cross-Sectional	rs7234562	18	34483685	DTNA	t	c	338	-0.192	-+	0.8481	0.975962
	Ventricular_Volume	Cross-Sectional	rs79922046	18	34485536	DTNA	a	g	338	-0.335	+-	0.7374	0.975962
	Ventricular_Volume	Cross-Sectional	rs9955950	18	34485672	DTNA	t	c	338	0.939	++	0.3476	0.942126
	Ventricular_Volume	Cross-Sectional	rs12957028	18	34485948	DTNA	a	g	338	0.179	+-	0.8579	0.975962
	Ventricular_Volume	Cross-Sectional	rs72639491	18	34491438	DTNA	a	g	338	0.454	++	0.6499	0.958417
	Ventricular_Volume	Cross-Sectional	rs62097347	18	34492032	DTNA	c	g	338	-0.533	--	0.5944	0.946893
	Ventricular_Volume	Cross-Sectional	rs9961251	18	34492344	DTNA	t	c	338	-0.833	--	0.4049	0.942126
	Ventricular_Volume	Cross-Sectional	rs111846993	18	34494001	DTNA	t	c	338	-0.609	--	0.5424	0.942126
	Ventricular_Volume	Cross-Sectional	rs4799769	18	34494577	DTNA	c	g	338	-1.489	--	0.1365	0.865263
	Ventricular_Volume	Cross-Sectional	rs8092794	18	34496273	DTNA	a	g	338	0.673	++	0.5008	0.942126
	Ventricular_Volume	Cross-Sectional	rs7243528	18	34497055	DTNA	t	c	338	0.974	-+	0.3299	0.94159
	Ventricular_Volume	Cross-Sectional	rs79972565	18	34497194	DTNA	t	g	338	0.243	++	0.8082	0.975962
	Ventricular_Volume	Cross-Sectional	rs35839923	18	34497764	DTNA	a	g	338	0.217	-+	0.8284	0.975962
	Ventricular_Volume	Cross-Sectional	rs62097349	18	34499519	DTNA	a	g	338	-0.154	+-	0.8775	0.975962
	Ventricular_Volume	Cross-Sectional	rs9965622	18	34502153	DTNA	t	c	338	1.476	++	0.1401	0.865263
	Ventricular_Volume	Cross-Sectional	rs62098462	18	34504364	DTNA	t	c	338	-0.737	+-	0.4611	0.942126
	Ventricular_Volume	Cross-Sectional	rs75127284	18	34506592	DTNA	a	c	338	-0.316	+-	0.7522	0.975962
	Ventricular_Volume	Cross-Sectional	rs2439861	18	34507940	DTNA	a	g	338	0.89	-+	0.3734	0.942126
	Ventricular_Volume	Cross-Sectional	rs35982920	18	34516411	DTNA	a	g	338	-0.045	+-	0.964	0.9876
	Ventricular_Volume	Cross-Sectional	rs2509597	18	34528430	DTNA	a	t	338	1.066	-+	0.2865	0.934536
	Ventricular_Volume	Cross-Sectional	rs71363449	18	34531997	DTNA	t	c	338	0.603	++	0.5463	0.942126
	Ventricular_Volume	Cross-Sectional	rs2439853	18	34533937	DTNA	a	g	338	-0.491	+-	0.6233	0.950171
	Ventricular_Volume	Cross-Sectional	rs2439000	18	34536414	DTNA	c	g	338	1.354	++	0.1757	0.865263
	Ventricular_Volume	Cross-Sectional	rs11875892	18	34544032	DTNA	a	g	338	0.186	+-	0.8523	0.975962
	Ventricular_Volume	Cross-Sectional	rs1967583	18	34544573	DTNA	t	c	338	-1.611	--	0.1071	0.865263
	Ventricular_Volume	Cross-Sectional	rs28856895	18	34555507	DTNA	a	g	338	-0.673	--	0.5007	0.942126
	Ventricular_Volume	Cross-Sectional	rs77973497	18	34560529	DTNA	a	c	338	-0.447	+-	0.6549	0.958417
	Ventricular_Volume	Cross-Sectional	rs2579796	18	34569243	DTNA	a	g	338	-0.726	--	0.4679	0.942126
	Ventricular_Volume	Cross-Sectional	rs2579797	18	34571732	DTNA	t	g	338	-1.245	--	0.2132	0.865263
	Ventricular_Volume	Cross-Sectional	rs2685557	18	34576782	DTNA	t	c	338	-0.752	--	0.4522	0.942126
	Ventricular_Volume	Cross-Sectional	rs9958492	18	34577783	DTNA	t	c	338	0.403	++	0.687	0.970299
	Ventricular_Volume	Cross-Sectional	rs2579802	18	34579787	DTNA	a	c	338	-0.918	--	0.3585	0.942126
	Ventricular_Volume	Cross-Sectional	rs74920018	18	34607557	DTNA	a	t	338	-0.371	+-	0.7107	0.975962
	Ventricular_Volume	Cross-Sectional	rs1439127	18	34607759	DTNA	a	t	338	-0.162	-+	0.871	0.975962
	Ventricular_Volume	Cross-Sectional	rs12327368	18	34611361	DTNA	a	g	338	0.443	++	0.6576	0.958417
	Ventricular_Volume	Cross-Sectional	rs62097188	18	34611412	DTNA	a	g	338	-1.52	--	0.1284	0.865263
	Ventricular_Volume	Cross-Sectional	rs9807153	18	34635520	DTNA	a	t	338	1.671	++	0.09474	0.865263
	Ventricular_Volume	Cross-Sectional	rs2730126	18	34635939	DTNA	a	c	338	-0.603	--	0.5465	0.942126
	Ventricular_Volume	Cross-Sectional	rs1659526	18	34644451	DTNA	a	g	338	-0.628	--	0.5298	0.942126
	Ventricular_Volume	Cross-Sectional	rs17642885	18	34649976	DTNA	t	c	338	0.52	++	0.6034	0.950171
	Ventricular_Volume	Cross-Sectional	rs1240974	18	34650949	DTNA	t	c	338	-0.888	--	0.3746	0.942126
	Ventricular_Volume	Cross-Sectional	rs55869511	18	34651262	DTNA	a	c	338	0.144	-+	0.8853	0.975962
	Ventricular_Volume	Cross-Sectional	rs12955208	18	34656737	DTNA	a	g	338	-0.989	--	0.3227	0.94159
	Ventricular_Volume	Cross-Sectional	rs72953203	18	34660068	DTNA	a	g	338	0.536	++	0.5919	0.946893
	Ventricular_Volume	Cross-Sectional	rs9946070	18	34665505	DTNA	a	g	338	-0.235	+-	0.8141	0.975962
	Ventricular_Volume	Cross-Sectional	rs72953211	18	34673381	DTNA	a	c	338	1.344	++	0.1789	0.865263
	Ventricular_Volume	Cross-Sectional	rs55971592	18	34697328	DTNA	a	g	338	1.409	++	0.1589	0.865263
	Ventricular_Volume	Cross-Sectional	rs78837792	18	34703359	DTNA	t	c	338	-0.806	--	0.4204	0.942126
	Ventricular_Volume	Cross-Sectional	rs11663468	18	34707936	DTNA	t	c	338	-2.038	--	0.04154	0.865263
	Ventricular_Volume	Cross-Sectional	rs12963825	18	34709484	DTNA	a	g	338	1.266	++	0.2054	0.865263
	Ventricular_Volume	Cross-Sectional	rs1480432	18	34727166	DTNA	t	g	338	-0.132	+-	0.8952	0.975962
	Ventricular_Volume	Cross-Sectional	rs45556134	18	34729425	DTNA	a	g	338	-0.78	+-	0.4356	0.942126
	Ventricular_Volume	Cross-Sectional	rs899828	18	34732688	DTNA	t	g	338	0.032	+-	0.9746	0.9876
	Ventricular_Volume	Cross-Sectional	rs17556884	18	34736455	DTNA	t	c	338	-0.976	--	0.3289	0.94159
	Ventricular_Volume	Cross-Sectional	rs1480428	18	34738732	DTNA	a	g	338	0.293	-+	0.7699	0.975962
	Ventricular_Volume	Cross-Sectional	rs12957349	18	34739291	DTNA	t	c	338	-1.003	+-	0.316	0.94159
	Ventricular_Volume	Cross-Sectional	rs12608110	18	34752198	DTNA	a	g	338	0.353	+-	0.7244	0.975962
	Ventricular_Volume	Cross-Sectional	rs7228547	18	34760039	DTNA	a	g	338	1.778	++	0.07534	0.865263
	Ventricular_Volume	Cross-Sectional	rs8099437	18	34761448	DTNA	t	g	338	0.15	-+	0.8808	0.975962
	Ventricular_Volume	Cross-Sectional	rs72955132	18	34762382	DTNA	a	g	338	-0.921	--	0.3573	0.942126
	Ventricular_Volume	Cross-Sectional	rs1817452	18	34776629	DTNA	t	c	338	-1.189	+-	0.2344	0.865263
	Ventricular_Volume	Cross-Sectional	rs56404226	18	34778060	DTNA	a	g	338	-0.289	-+	0.7729	0.975962
	Ventricular_Volume	Cross-Sectional	rs72955175	18	34779045	DTNA	a	t	338	1.816	++	0.06932	0.865263
	Ventricular_Volume	Cross-Sectional	rs12608251	18	34782906	DTNA	t	g	338	-1.539	+-	0.1237	0.865263
	Ventricular_Volume	Cross-Sectional	rs76880720	18	34791141	DTNA	a	c	338	0.831	-+	0.406	0.942126
	Ventricular_Volume	Cross-Sectional	rs9989533	18	34793909	DTNA	t	c	338	1.432	++	0.1522	0.865263
	Ventricular_Volume	Cross-Sectional	rs79500711	18	34794379	DTNA	a	g	338	0.811	++	0.4172	0.942126
	Ventricular_Volume	Cross-Sectional	rs138856611	18	34801684	DTNA	t	g	338	-1.703	--	0.08865	0.865263
	Ventricular_Volume	Cross-Sectional	rs62097226	18	34804223	DTNA	a	t	338	-0.301	-+	0.7636	0.975962
	Ventricular_Volume	Cross-Sectional	rs4458079	18	34806161	DTNA	t	c	338	0.016	+-	0.9873	0.9876
	Ventricular_Volume	Cross-Sectional	rs8086358	18	34813672	DTNA	t	g	338	-1.194	+-	0.2324	0.865263
	Ventricular_Volume	Cross-Sectional	rs72963047	18	34818804	DTNA	a	c	338	-0.2	--	0.8411	0.975962
	Ventricular_Volume	Cross-Sectional	rs17557660	18	34831178	DTNA	a	t	338	-0.056	+-	0.9552	0.9876
	Ventricular_Volume	Cross-Sectional	rs1790533	18	34831631	DTNA	a	g	338	-1.23	+-	0.2188	0.865263
	Ventricular_Volume	Cross-Sectional	rs4799782	18	34841123	DTNA	a	g	338	2.053	++	0.04003	0.865263
	Ventricular_Volume	Cross-Sectional	rs1786604	18	34846264	DTNA	a	g	338	1.538	++	0.124	0.865263
	Ventricular_Volume	Cross-Sectional	rs7233779	18	34863262	DTNA	a	g	338	-0.551	+-	0.5818	0.946893
	Ventricular_Volume	Cross-Sectional	rs644982	18	34869793	DTNA	a	g	338	-1.312	--	0.1895	0.865263
	Ventricular_Volume	Cross-Sectional	rs11659517	18	34870978	DTNA	a	t	338	-0.776	+-	0.4379	0.942126
	Ventricular_Volume	Cross-Sectional	rs524969	18	34872102	DTNA	a	t	338	1.337	++	0.1811	0.865263
	Ventricular_Volume	Cross-Sectional	rs637914	18	34876135	DTNA	a	t	338	0.366	++	0.7142	0.975962
	Ventricular_Volume	Cross-Sectional	rs9304141	18	34879143	DTNA	t	c	338	0.043	-+	0.9656	0.9876
	Ventricular_Volume	Cross-Sectional	rs2288085	18	34879740	DTNA	a	g	338	-0.347	-+	0.7284	0.975962
	Ventricular_Volume	Cross-Sectional	rs17558116	18	34882719	DTNA	t	c	338	-0.579	--	0.5625	0.942126
	Ventricular_Volume	Cross-Sectional	rs10502637	18	34890006	DTNA	t	c	338	-1.134	--	0.2567	0.901741
	Ventricular_Volume	Cross-Sectional	rs149163416	18	34898841	DTNA	a	g	338	-1.026	+-	0.3047	0.94159
	Ventricular_Volume	Cross-Sectional	20:33413780	20	33413780	SNTA1	a	t	338	-1.248	--	0.2121	0.865263
	Ventricular_Volume	Cross-Sectional	rs291683	20	33431611	SNTA1	t	c	338	0.14	+-	0.8884	0.975962
	Ventricular_Volume	Cross-Sectional	20:33433270	20	33433270	SNTA1	t	c	338	-0.065	-+	0.9479	0.9876
	Ventricular_Volume	Cross-Sectional	rs6141396	20	33436147	SNTA1	a	c	93	-1.259	-?	0.2079	0.865263
	Ventricular_Volume	Cross-Sectional	rs293721	20	33441633	SNTA1	t	c	338	-0.67	+-	0.5031	0.942126
	Ventricular_Volume	Longitudinal	rs111599092	3	49465346	DAG1	a	g	111	0.42	++	0.6745	0.978979
	Ventricular_Volume	Longitudinal	rs73073015	3	49465733	DAG1	a	g	111	-0.522	-+	0.6017	0.978979
	Ventricular_Volume	Longitudinal	rs7611164	3	49471395	DAG1	t	g	111	0.19	+-	0.849	0.978979
	Ventricular_Volume	Longitudinal	rs1568661	3	49483525	DAG1	a	g	111	-1.333	--	0.1825	0.901404
	Ventricular_Volume	Longitudinal	rs7374731	3	49495661	DAG1	c	g	111	-1.155	--	0.248	0.901404
	Ventricular_Volume	Longitudinal	rs73074811	3	49516098	DAG1	a	t	111	-0.082	+-	0.935	0.992985
	Ventricular_Volume	Longitudinal	rs3870338	3	49519618	DAG1	a	g	111	-1.333	--	0.1825	0.901404
	Ventricular_Volume	Longitudinal	rs55935606	3	49528072	DAG1	a	g	111	1.222	++	0.2216	0.901404
	Ventricular_Volume	Longitudinal	rs75153130	3	49530436	DAG1	a	c	111	-0.19	-+	0.849	0.978979
	Ventricular_Volume	Longitudinal	rs13079082	3	49537375	DAG1	c	g	111	1.426	++	0.1539	0.901404
	Ventricular_Volume	Longitudinal	rs4052546	3	49538116	DAG1	c	g	111	1.155	++	0.248	0.901404
	Ventricular_Volume	Longitudinal	rs73074830	3	49539584	DAG1	a	c	111	0.292	++	0.7704	0.978979
	Ventricular_Volume	Longitudinal	rs114093899	3	49539955	DAG1	c	g	111	-0.665	-+	0.5061	0.956717
	Ventricular_Volume	Longitudinal	rs9789109	18	26842291	AQP4	a	g	111	0.834	++	0.4041	0.922695
	Ventricular_Volume	Longitudinal	rs10164026	18	26842362	AQP4	a	c	111	-0.217	+-	0.8281	0.978979
	Ventricular_Volume	Longitudinal	rs4800270	18	26844933	AQP4	t	g	111	-0.187	-+	0.8518	0.978979
	Ventricular_Volume	Longitudinal	rs79668602	18	26845488	AQP4	a	g	111	-1.73	--	0.08367	0.716424
	Ventricular_Volume	Longitudinal	rs12458416	18	26847267	AQP4	c	g	111	-0.117	+-	0.9065	0.992985
	Ventricular_Volume	Longitudinal	rs12953446	18	26848521	AQP4	a	g	111	-0.491	--	0.6235	0.978979
	Ventricular_Volume	Longitudinal	rs67461489	18	26848876	AQP4	t	c	111	1.491	++	0.1361	0.901404
	Ventricular_Volume	Longitudinal	rs11661081	18	26850068	AQP4	a	c	111	0.249	-+	0.8036	0.978979
	Ventricular_Volume	Longitudinal	rs3763043	18	26855854	AQP4	t	c	111	0.703	++	0.4819	0.956717
	Ventricular_Volume	Longitudinal	rs68006382	18	26856555	AQP4	a	g	111	-0.089	-+	0.9294	0.992985
	Ventricular_Volume	Longitudinal	rs335930	18	26856961	AQP4	a	c	111	-0.989	--	0.3224	0.901404
	Ventricular_Volume	Longitudinal	rs71353405	18	26857429	AQP4	t	c	111	-0.998	+-	0.3185	0.901404
	Ventricular_Volume	Longitudinal	rs162009	18	26864250	AQP4	a	g	111	-0.104	+-	0.9171	0.992985
	Ventricular_Volume	Longitudinal	rs4800773	18	26865017	AQP4	a	g	111	-1.792	--	0.07315	0.716424
	Ventricular_Volume	Longitudinal	rs3875089	18	26865469	AQP4	t	c	111	2.308	++	0.02099	0.61924
	Ventricular_Volume	Longitudinal	rs72878787	18	26866517	AQP4	a	g	111	-0.012	+-	0.9907	0.9954
	Ventricular_Volume	Longitudinal	rs162006	18	26866570	AQP4	t	c	111	-1.054	--	0.2918	0.901404
	Ventricular_Volume	Longitudinal	rs151244	18	26866755	AQP4	t	c	111	1.298	++	0.1942	0.901404
	Ventricular_Volume	Longitudinal	rs72878794	18	26866839	AQP4	t	c	111	0.618	++	0.5364	0.956717
	Ventricular_Volume	Longitudinal	rs9961118	18	26866901	AQP4	t	c	111	2.302	++	0.02133	0.61924
	Ventricular_Volume	Longitudinal	rs162004	18	26867972	AQP4	c	g	111	0.324	+-	0.7458	0.978979
	Ventricular_Volume	Longitudinal	rs72878799	18	26868165	AQP4	a	g	111	-0.851	--	0.395	0.922695
	Ventricular_Volume	Longitudinal	rs11662318	18	26869056	AQP4	t	c	111	-0.843	+-	0.3992	0.922695
	Ventricular_Volume	Longitudinal	rs151246	18	26869139	AQP4	t	g	111	0.735	++	0.4622	0.956717
	Ventricular_Volume	Longitudinal	rs491148	18	26869803	AQP4	a	g	111	1.746	-+	0.08073	0.716424
	Ventricular_Volume	Longitudinal	rs162002	18	26871015	AQP4	a	g	111	1.763	-+	0.07788	0.716424
	Ventricular_Volume	Longitudinal	rs162001	18	26871481	AQP4	a	c	111	0.147	+-	0.8835	0.992985
	Ventricular_Volume	Longitudinal	rs3865411	18	26871684	AQP4	a	g	111	1.846	++	0.0649	0.716424
	Ventricular_Volume	Longitudinal	rs162000	18	26872471	AQP4	a	c	111	1.443	-+	0.149	0.901404
	Ventricular_Volume	Longitudinal	rs12969503	18	26873564	AQP4	t	g	111	2.134	++	0.03282	0.61924
	Ventricular_Volume	Longitudinal	rs8094228	18	26873767	AQP4	t	c	111	0.18	-+	0.8575	0.978979
	Ventricular_Volume	Longitudinal	rs480647	18	26874290	AQP4	t	c	111	1.134	+-	0.2569	0.901404
	Ventricular_Volume	Longitudinal	rs10502478	18	26874616	AQP4	a	c	111	-0.571	-+	0.5677	0.964581
	Ventricular_Volume	Longitudinal	rs7234562	18	34483685	DTNA	t	c	111	0.613	-+	0.5401	0.956717
	Ventricular_Volume	Longitudinal	rs79922046	18	34485536	DTNA	a	g	111	0.094	-+	0.9252	0.992985
	Ventricular_Volume	Longitudinal	rs9955950	18	34485672	DTNA	t	c	111	0.535	++	0.5924	0.978979
	Ventricular_Volume	Longitudinal	rs12957028	18	34485948	DTNA	a	g	111	-0.408	+-	0.683	0.978979
	Ventricular_Volume	Longitudinal	rs72639491	18	34491438	DTNA	a	g	111	-0.498	-+	0.6188	0.978979
	Ventricular_Volume	Longitudinal	rs62097347	18	34492032	DTNA	c	g	111	-0.388	--	0.6982	0.978979
	Ventricular_Volume	Longitudinal	rs9961251	18	34492344	DTNA	t	c	111	0.396	-+	0.6923	0.978979
	Ventricular_Volume	Longitudinal	rs111846993	18	34494001	DTNA	t	c	111	0.19	-+	0.8492	0.978979
	Ventricular_Volume	Longitudinal	rs4799769	18	34494577	DTNA	c	g	111	0.588	++	0.5567	0.964581
	Ventricular_Volume	Longitudinal	rs8092794	18	34496273	DTNA	a	g	111	-0.871	--	0.384	0.922695
	Ventricular_Volume	Longitudinal	rs7243528	18	34497055	DTNA	t	c	111	0.218	-+	0.8275	0.978979
	Ventricular_Volume	Longitudinal	rs79972565	18	34497194	DTNA	t	g	111	0.718	-+	0.4727	0.956717
	Ventricular_Volume	Longitudinal	rs35839923	18	34497764	DTNA	a	g	111	-0.017	+-	0.9862	0.9954
	Ventricular_Volume	Longitudinal	rs62097349	18	34499519	DTNA	a	g	111	0.115	-+	0.9088	0.992985
	Ventricular_Volume	Longitudinal	rs9965622	18	34502153	DTNA	t	c	111	-0.568	-+	0.5703	0.964581
	Ventricular_Volume	Longitudinal	rs62098462	18	34504364	DTNA	t	c	111	-0.289	--	0.7726	0.978979
	Ventricular_Volume	Longitudinal	rs75127284	18	34506592	DTNA	a	c	111	-0.867	+-	0.386	0.922695
	Ventricular_Volume	Longitudinal	rs2439861	18	34507940	DTNA	a	g	111	0.681	-+	0.4958	0.956717
	Ventricular_Volume	Longitudinal	rs35982920	18	34516411	DTNA	a	g	111	1.047	++	0.2952	0.901404
	Ventricular_Volume	Longitudinal	rs2509597	18	34528430	DTNA	a	t	111	0.606	-+	0.5447	0.956717
	Ventricular_Volume	Longitudinal	rs71363449	18	34531997	DTNA	t	c	111	0.449	++	0.6535	0.978979
	Ventricular_Volume	Longitudinal	rs2439853	18	34533937	DTNA	a	g	111	-0.455	+-	0.6491	0.978979
	Ventricular_Volume	Longitudinal	rs2439000	18	34536414	DTNA	c	g	111	0.994	-+	0.3203	0.901404
	Ventricular_Volume	Longitudinal	rs11875892	18	34544032	DTNA	a	g	111	1.033	++	0.3014	0.901404
	Ventricular_Volume	Longitudinal	rs1967583	18	34544573	DTNA	t	c	111	1.006	++	0.3145	0.901404
	Ventricular_Volume	Longitudinal	rs28856895	18	34555507	DTNA	a	g	111	-0.408	--	0.6836	0.978979
	Ventricular_Volume	Longitudinal	rs77973497	18	34560529	DTNA	a	c	111	0.722	-+	0.4702	0.956717
	Ventricular_Volume	Longitudinal	rs2579796	18	34569243	DTNA	a	g	111	-0.846	+-	0.3977	0.922695
	Ventricular_Volume	Longitudinal	rs2579797	18	34571732	DTNA	t	g	111	-0.994	+-	0.3203	0.901404
	Ventricular_Volume	Longitudinal	rs2685557	18	34576782	DTNA	t	c	111	-0.846	+-	0.3977	0.922695
	Ventricular_Volume	Longitudinal	rs9958492	18	34577783	DTNA	t	c	111	0.006	+-	0.9954	0.9954
	Ventricular_Volume	Longitudinal	rs2579802	18	34579787	DTNA	a	c	111	-1.146	--	0.2516	0.901404
	Ventricular_Volume	Longitudinal	rs74920018	18	34607557	DTNA	a	t	111	0.663	-+	0.5075	0.956717
	Ventricular_Volume	Longitudinal	rs1439127	18	34607759	DTNA	a	t	111	0.489	+-	0.6249	0.978979
	Ventricular_Volume	Longitudinal	rs12327368	18	34611361	DTNA	a	g	111	0.006	+-	0.9954	0.9954
	Ventricular_Volume	Longitudinal	rs62097188	18	34611412	DTNA	a	g	111	-1.127	--	0.2596	0.901404
	Ventricular_Volume	Longitudinal	rs9807153	18	34635520	DTNA	a	t	111	0.295	+-	0.7677	0.978979
	Ventricular_Volume	Longitudinal	rs2730126	18	34635939	DTNA	a	c	111	-0.95	+-	0.3423	0.922695
	Ventricular_Volume	Longitudinal	rs1659526	18	34644451	DTNA	a	g	111	-0.654	+-	0.5129	0.956717
	Ventricular_Volume	Longitudinal	rs17642885	18	34649976	DTNA	t	c	111	0.258	-+	0.7963	0.978979
	Ventricular_Volume	Longitudinal	rs1240974	18	34650949	DTNA	t	c	111	-0.611	+-	0.5412	0.956717
	Ventricular_Volume	Longitudinal	rs55869511	18	34651262	DTNA	a	c	111	-0.349	--	0.7271	0.978979
	Ventricular_Volume	Longitudinal	rs12955208	18	34656737	DTNA	a	g	111	0.225	-+	0.8217	0.978979
	Ventricular_Volume	Longitudinal	rs72953203	18	34660068	DTNA	a	g	111	0.019	+-	0.9847	0.9954
	Ventricular_Volume	Longitudinal	rs9946070	18	34665505	DTNA	a	g	111	0.124	+-	0.9012	0.992985
	Ventricular_Volume	Longitudinal	rs72953211	18	34673381	DTNA	a	c	111	0.704	-+	0.4814	0.956717
	Ventricular_Volume	Longitudinal	rs55971592	18	34697328	DTNA	a	g	111	0.74	-+	0.4592	0.956717
	Ventricular_Volume	Longitudinal	rs78837792	18	34703359	DTNA	t	c	111	0.1	-+	0.9206	0.992985
	Ventricular_Volume	Longitudinal	rs11663468	18	34707936	DTNA	t	c	111	-0.059	+-	0.9532	0.9954
	Ventricular_Volume	Longitudinal	rs12963825	18	34709484	DTNA	a	g	111	0.323	+-	0.7466	0.978979
	Ventricular_Volume	Longitudinal	rs1480432	18	34727166	DTNA	t	g	111	0.792	++	0.4286	0.956717
	Ventricular_Volume	Longitudinal	rs45556134	18	34729425	DTNA	a	g	111	-0.422	+-	0.6729	0.978979
	Ventricular_Volume	Longitudinal	rs899828	18	34732688	DTNA	t	g	111	-2.031	--	0.04229	0.61924
	Ventricular_Volume	Longitudinal	rs17556884	18	34736455	DTNA	t	c	111	-0.386	-+	0.6992	0.978979
	Ventricular_Volume	Longitudinal	rs1480428	18	34738732	DTNA	a	g	111	-0.356	-+	0.7219	0.978979
	Ventricular_Volume	Longitudinal	rs12957349	18	34739291	DTNA	t	c	111	0.225	-+	0.8217	0.978979
	Ventricular_Volume	Longitudinal	rs12608110	18	34752198	DTNA	a	g	111	-1.02	--	0.3077	0.901404
	Ventricular_Volume	Longitudinal	rs7228547	18	34760039	DTNA	a	g	111	0.059	-+	0.9532	0.9954
	Ventricular_Volume	Longitudinal	rs8099437	18	34761448	DTNA	t	g	111	-0.356	-+	0.7219	0.978979
	Ventricular_Volume	Longitudinal	rs72955132	18	34762382	DTNA	a	g	111	-0.386	-+	0.6992	0.978979
	Ventricular_Volume	Longitudinal	rs1817452	18	34776629	DTNA	t	c	111	0.188	-+	0.8505	0.978979
	Ventricular_Volume	Longitudinal	rs56404226	18	34778060	DTNA	a	g	111	2.018	++	0.04364	0.61924
	Ventricular_Volume	Longitudinal	rs72955175	18	34779045	DTNA	a	t	111	-0.837	-+	0.4026	0.922695
	Ventricular_Volume	Longitudinal	rs12608251	18	34782906	DTNA	t	g	111	1.317	++	0.1878	0.901404
	Ventricular_Volume	Longitudinal	rs76880720	18	34791141	DTNA	a	c	111	-0.329	+-	0.7422	0.978979
	Ventricular_Volume	Longitudinal	rs9989533	18	34793909	DTNA	t	c	111	-1.131	--	0.2581	0.901404
	Ventricular_Volume	Longitudinal	rs79500711	18	34794379	DTNA	a	g	111	-0.723	-+	0.47	0.956717
	Ventricular_Volume	Longitudinal	rs138856611	18	34801684	DTNA	t	g	111	-1.391	--	0.1642	0.901404
	Ventricular_Volume	Longitudinal	rs62097226	18	34804223	DTNA	a	t	111	0.626	++	0.5315	0.956717
	Ventricular_Volume	Longitudinal	rs4458079	18	34806161	DTNA	t	c	111	1.107	++	0.2683	0.901404
	Ventricular_Volume	Longitudinal	rs8086358	18	34813672	DTNA	t	g	111	0.784	+-	0.433	0.956717
	Ventricular_Volume	Longitudinal	rs72963047	18	34818804	DTNA	a	c	111	-0.019	+-	0.9851	0.9954
	Ventricular_Volume	Longitudinal	rs17557660	18	34831178	DTNA	a	t	111	-2.207	--	0.02734	0.61924
	Ventricular_Volume	Longitudinal	rs1790533	18	34831631	DTNA	a	g	111	1.185	++	0.2361	0.901404
	Ventricular_Volume	Longitudinal	rs4799782	18	34841123	DTNA	a	g	111	1.374	++	0.1696	0.901404
	Ventricular_Volume	Longitudinal	rs1786604	18	34846264	DTNA	a	g	111	-0.883	-+	0.3772	0.922695
	Ventricular_Volume	Longitudinal	rs7233779	18	34863262	DTNA	a	g	111	-0.944	+-	0.3452	0.922695
	Ventricular_Volume	Longitudinal	rs644982	18	34869793	DTNA	a	g	111	2.003	++	0.0452	0.61924
	Ventricular_Volume	Longitudinal	rs11659517	18	34870978	DTNA	a	t	111	0.262	-+	0.7934	0.978979
	Ventricular_Volume	Longitudinal	rs524969	18	34872102	DTNA	a	t	111	-1.477	--	0.1396	0.901404
	Ventricular_Volume	Longitudinal	rs637914	18	34876135	DTNA	a	t	111	-1.942	--	0.05211	0.649006
	Ventricular_Volume	Longitudinal	rs9304141	18	34879143	DTNA	t	c	111	2.307	++	0.02103	0.61924
	Ventricular_Volume	Longitudinal	rs2288085	18	34879740	DTNA	a	g	111	1.258	++	0.2084	0.901404
	Ventricular_Volume	Longitudinal	rs17558116	18	34882719	DTNA	t	c	111	0.299	-+	0.7646	0.978979
	Ventricular_Volume	Longitudinal	rs10502637	18	34890006	DTNA	t	c	111	1.163	++	0.2448	0.901404
	Ventricular_Volume	Longitudinal	rs149163416	18	34898841	DTNA	a	g	111	-2.036	--	0.04177	0.61924
	Ventricular_Volume	Longitudinal	20:33413780	20	33413780	SNTA1	a	t	111	1.645	++	0.09996	0.80556
	Ventricular_Volume	Longitudinal	rs291683	20	33431611	SNTA1	t	c	111	2.067	++	0.03874	0.61924
	Ventricular_Volume	Longitudinal	20:33433270	20	33433270	SNTA1	t	c	111	-1.186	+-	0.2356	0.901404
	Ventricular_Volume	Longitudinal	rs6141396	20	33436147	SNTA1	a	c	47	-1.44	-?	0.1498	0.901404
	Ventricular_Volume	Longitudinal	rs293721	20	33441633	SNTA1	t	c	111	-0.289	-+	0.7729	0.978979
	White_Matter_Volume	Cross-Sectional	rs111599092	3	49465346	DAG1	a	g	338	1.175	-+	0.2401	0.968099
	White_Matter_Volume	Cross-Sectional	rs73073015	3	49465733	DAG1	a	g	338	-0.073	-+	0.942	0.968099
	White_Matter_Volume	Cross-Sectional	rs7611164	3	49471395	DAG1	t	g	338	1.176	++	0.2395	0.968099
	White_Matter_Volume	Cross-Sectional	rs1568661	3	49483525	DAG1	a	g	338	-0.375	+-	0.7077	0.968099
	White_Matter_Volume	Cross-Sectional	rs7374731	3	49495661	DAG1	c	g	338	0.171	+-	0.8639	0.968099
	White_Matter_Volume	Cross-Sectional	rs73074811	3	49516098	DAG1	a	t	338	0.043	-+	0.9661	0.980413
	White_Matter_Volume	Cross-Sectional	rs3870338	3	49519618	DAG1	a	g	338	-0.375	+-	0.7077	0.968099
	White_Matter_Volume	Cross-Sectional	rs55935606	3	49528072	DAG1	a	g	338	0.301	-+	0.7635	0.968099
	White_Matter_Volume	Cross-Sectional	rs75153130	3	49530436	DAG1	a	c	338	-1.176	--	0.2395	0.968099
	White_Matter_Volume	Cross-Sectional	rs13079082	3	49537375	DAG1	c	g	338	0.375	+-	0.7079	0.968099
	White_Matter_Volume	Cross-Sectional	rs4052546	3	49538116	DAG1	c	g	338	-0.171	-+	0.8639	0.968099
	White_Matter_Volume	Cross-Sectional	rs73074830	3	49539584	DAG1	a	c	338	-0.393	+-	0.6941	0.968099
	White_Matter_Volume	Cross-Sectional	rs114093899	3	49539955	DAG1	c	g	338	-0.903	--	0.3664	0.968099
	White_Matter_Volume	Cross-Sectional	rs9789109	18	26842291	AQP4	a	g	338	0.402	-+	0.6873	0.968099
	White_Matter_Volume	Cross-Sectional	rs10164026	18	26842362	AQP4	a	c	338	-1.288	--	0.1976	0.968099
	White_Matter_Volume	Cross-Sectional	rs4800270	18	26844933	AQP4	t	g	338	-0.089	+-	0.9291	0.968099
	White_Matter_Volume	Cross-Sectional	rs79668602	18	26845488	AQP4	a	g	338	-0.417	--	0.6766	0.968099
	White_Matter_Volume	Cross-Sectional	rs12458416	18	26847267	AQP4	c	g	338	-0.9	--	0.3682	0.968099
	White_Matter_Volume	Cross-Sectional	rs12953446	18	26848521	AQP4	a	g	338	-0.218	+-	0.8272	0.968099
	White_Matter_Volume	Cross-Sectional	rs67461489	18	26848876	AQP4	t	c	338	0.215	-+	0.8295	0.968099
	White_Matter_Volume	Cross-Sectional	rs11661081	18	26850068	AQP4	a	c	338	1.668	++	0.09527	0.968099
	White_Matter_Volume	Cross-Sectional	rs3763043	18	26855854	AQP4	t	c	338	-0.281	+-	0.7788	0.968099
	White_Matter_Volume	Cross-Sectional	rs68006382	18	26856555	AQP4	a	g	338	0.208	+-	0.8354	0.968099
	White_Matter_Volume	Cross-Sectional	rs335930	18	26856961	AQP4	a	c	338	0.745	++	0.4563	0.968099
	White_Matter_Volume	Cross-Sectional	rs71353405	18	26857429	AQP4	t	c	338	0.208	+-	0.8349	0.968099
	White_Matter_Volume	Cross-Sectional	rs162009	18	26864250	AQP4	a	g	338	-0.349	+-	0.7267	0.968099
	White_Matter_Volume	Cross-Sectional	rs4800773	18	26865017	AQP4	a	g	338	-0.475	--	0.6348	0.968099
	White_Matter_Volume	Cross-Sectional	rs3875089	18	26865469	AQP4	t	c	338	1.374	-+	0.1695	0.968099
	White_Matter_Volume	Cross-Sectional	rs72878787	18	26866517	AQP4	a	g	338	-1.073	--	0.2833	0.968099
	White_Matter_Volume	Cross-Sectional	rs162006	18	26866570	AQP4	t	c	338	0.115	+-	0.9088	0.968099
	White_Matter_Volume	Cross-Sectional	rs151244	18	26866755	AQP4	t	c	338	0.896	++	0.37	0.968099
	White_Matter_Volume	Cross-Sectional	rs72878794	18	26866839	AQP4	t	c	338	1.036	-+	0.3003	0.968099
	White_Matter_Volume	Cross-Sectional	rs9961118	18	26866901	AQP4	t	c	338	4.464	++	8.03e-06	0.00110066
	White_Matter_Volume	Cross-Sectional	rs162004	18	26867972	AQP4	c	g	338	-0.85	+-	0.3955	0.968099
	White_Matter_Volume	Cross-Sectional	rs72878799	18	26868165	AQP4	a	g	338	-1.062	+-	0.2884	0.968099
	White_Matter_Volume	Cross-Sectional	rs11662318	18	26869056	AQP4	t	c	338	-0.546	+-	0.5852	0.968099
	White_Matter_Volume	Cross-Sectional	rs151246	18	26869139	AQP4	t	g	338	-0.769	--	0.4421	0.968099
	White_Matter_Volume	Cross-Sectional	rs491148	18	26869803	AQP4	a	g	338	1.539	++	0.1238	0.968099
	White_Matter_Volume	Cross-Sectional	rs162002	18	26871015	AQP4	a	g	338	1.956	++	0.05043	0.906084
	White_Matter_Volume	Cross-Sectional	rs162001	18	26871481	AQP4	a	c	338	-1.319	+-	0.1873	0.968099
	White_Matter_Volume	Cross-Sectional	rs3865411	18	26871684	AQP4	a	g	338	2.858	++	0.00426	0.29181
	White_Matter_Volume	Cross-Sectional	rs162000	18	26872471	AQP4	a	c	338	2.011	++	0.0443	0.906084
	White_Matter_Volume	Cross-Sectional	rs12969503	18	26873564	AQP4	t	g	338	0.981	++	0.3267	0.968099
	White_Matter_Volume	Cross-Sectional	rs8094228	18	26873767	AQP4	t	c	338	-1.347	--	0.1781	0.968099
	White_Matter_Volume	Cross-Sectional	rs480647	18	26874290	AQP4	t	c	338	-0.113	+-	0.9101	0.968099
	White_Matter_Volume	Cross-Sectional	rs10502478	18	26874616	AQP4	a	c	338	-2.082	--	0.03734	0.906084
	White_Matter_Volume	Cross-Sectional	rs7234562	18	34483685	DTNA	t	c	338	-0.073	+-	0.9421	0.968099
	White_Matter_Volume	Cross-Sectional	rs79922046	18	34485536	DTNA	a	g	338	0.625	-+	0.5322	0.968099
	White_Matter_Volume	Cross-Sectional	rs9955950	18	34485672	DTNA	t	c	338	-1.238	--	0.2158	0.968099
	White_Matter_Volume	Cross-Sectional	rs12957028	18	34485948	DTNA	a	g	338	1.209	-+	0.2268	0.968099
	White_Matter_Volume	Cross-Sectional	rs72639491	18	34491438	DTNA	a	g	338	-0.616	--	0.5382	0.968099
	White_Matter_Volume	Cross-Sectional	rs62097347	18	34492032	DTNA	c	g	338	1.953	++	0.05079	0.906084
	White_Matter_Volume	Cross-Sectional	rs9961251	18	34492344	DTNA	t	c	338	0.92	++	0.3577	0.968099
	White_Matter_Volume	Cross-Sectional	rs111846993	18	34494001	DTNA	t	c	338	0.658	++	0.5108	0.968099
	White_Matter_Volume	Cross-Sectional	rs4799769	18	34494577	DTNA	c	g	338	0.263	+-	0.7923	0.968099
	White_Matter_Volume	Cross-Sectional	rs8092794	18	34496273	DTNA	a	g	338	-0.617	--	0.5373	0.968099
	White_Matter_Volume	Cross-Sectional	rs7243528	18	34497055	DTNA	t	c	338	-0.534	--	0.5933	0.968099
	White_Matter_Volume	Cross-Sectional	rs79972565	18	34497194	DTNA	t	g	338	-1.038	--	0.2993	0.968099
	White_Matter_Volume	Cross-Sectional	rs35839923	18	34497764	DTNA	a	g	338	-0.547	--	0.5844	0.968099
	White_Matter_Volume	Cross-Sectional	rs62097349	18	34499519	DTNA	a	g	338	-0.804	--	0.4216	0.968099
	White_Matter_Volume	Cross-Sectional	rs9965622	18	34502153	DTNA	t	c	338	-0.668	--	0.5042	0.968099
	White_Matter_Volume	Cross-Sectional	rs62098462	18	34504364	DTNA	t	c	338	0.447	++	0.6552	0.968099
	White_Matter_Volume	Cross-Sectional	rs75127284	18	34506592	DTNA	a	c	338	0.125	++	0.9007	0.968099
	White_Matter_Volume	Cross-Sectional	rs2439861	18	34507940	DTNA	a	g	338	-0.737	--	0.4611	0.968099
	White_Matter_Volume	Cross-Sectional	rs35982920	18	34516411	DTNA	a	g	338	-0.603	--	0.5462	0.968099
	White_Matter_Volume	Cross-Sectional	rs2509597	18	34528430	DTNA	a	t	338	0.17	++	0.8648	0.968099
	White_Matter_Volume	Cross-Sectional	rs71363449	18	34531997	DTNA	t	c	338	-1.253	+-	0.2103	0.968099
	White_Matter_Volume	Cross-Sectional	rs2439853	18	34533937	DTNA	a	g	338	-0.067	+-	0.9464	0.968099
	White_Matter_Volume	Cross-Sectional	rs2439000	18	34536414	DTNA	c	g	338	-1.081	--	0.2799	0.968099
	White_Matter_Volume	Cross-Sectional	rs11875892	18	34544032	DTNA	a	g	338	-0.446	+-	0.6556	0.968099
	White_Matter_Volume	Cross-Sectional	rs1967583	18	34544573	DTNA	t	c	338	0.481	-+	0.6306	0.968099
	White_Matter_Volume	Cross-Sectional	rs28856895	18	34555507	DTNA	a	g	338	-0.267	+-	0.7892	0.968099
	White_Matter_Volume	Cross-Sectional	rs77973497	18	34560529	DTNA	a	c	338	0.651	++	0.5151	0.968099
	White_Matter_Volume	Cross-Sectional	rs2579796	18	34569243	DTNA	a	g	338	0.19	+-	0.8493	0.968099
	White_Matter_Volume	Cross-Sectional	rs2579797	18	34571732	DTNA	t	g	338	1.196	++	0.2315	0.968099
	White_Matter_Volume	Cross-Sectional	rs2685557	18	34576782	DTNA	t	c	338	0.092	+-	0.9266	0.968099
	White_Matter_Volume	Cross-Sectional	rs9958492	18	34577783	DTNA	t	c	338	-0.995	+-	0.3199	0.968099
	White_Matter_Volume	Cross-Sectional	rs2579802	18	34579787	DTNA	a	c	338	0.624	++	0.5323	0.968099
	White_Matter_Volume	Cross-Sectional	rs74920018	18	34607557	DTNA	a	t	338	0.528	++	0.5978	0.968099
	White_Matter_Volume	Cross-Sectional	rs1439127	18	34607759	DTNA	a	t	338	-1.226	--	0.2202	0.968099
	White_Matter_Volume	Cross-Sectional	rs12327368	18	34611361	DTNA	a	g	338	-0.87	+-	0.3845	0.968099
	White_Matter_Volume	Cross-Sectional	rs62097188	18	34611412	DTNA	a	g	338	0.711	-+	0.4774	0.968099
	White_Matter_Volume	Cross-Sectional	rs9807153	18	34635520	DTNA	a	t	338	-0.114	-+	0.9093	0.968099
	White_Matter_Volume	Cross-Sectional	rs2730126	18	34635939	DTNA	a	c	338	-0.111	+-	0.9113	0.968099
	White_Matter_Volume	Cross-Sectional	rs1659526	18	34644451	DTNA	a	g	338	0.325	++	0.745	0.968099
	White_Matter_Volume	Cross-Sectional	rs17642885	18	34649976	DTNA	t	c	338	0.834	++	0.404	0.968099
	White_Matter_Volume	Cross-Sectional	rs1240974	18	34650949	DTNA	t	c	338	0.704	++	0.4814	0.968099
	White_Matter_Volume	Cross-Sectional	rs55869511	18	34651262	DTNA	a	c	338	0.822	-+	0.411	0.968099
	White_Matter_Volume	Cross-Sectional	rs12955208	18	34656737	DTNA	a	g	338	0.567	-+	0.571	0.968099
	White_Matter_Volume	Cross-Sectional	rs72953203	18	34660068	DTNA	a	g	338	1.07	++	0.2846	0.968099
	White_Matter_Volume	Cross-Sectional	rs9946070	18	34665505	DTNA	a	g	338	-0.229	+-	0.8187	0.968099
	White_Matter_Volume	Cross-Sectional	rs72953211	18	34673381	DTNA	a	c	338	-0.116	+-	0.908	0.968099
	White_Matter_Volume	Cross-Sectional	rs55971592	18	34697328	DTNA	a	g	338	-0.203	+-	0.8391	0.968099
	White_Matter_Volume	Cross-Sectional	rs78837792	18	34703359	DTNA	t	c	338	0.18	-+	0.8568	0.968099
	White_Matter_Volume	Cross-Sectional	rs11663468	18	34707936	DTNA	t	c	338	-0.025	-+	0.9803	0.987508
	White_Matter_Volume	Cross-Sectional	rs12963825	18	34709484	DTNA	a	g	338	-0.662	+-	0.5078	0.968099
	White_Matter_Volume	Cross-Sectional	rs1480432	18	34727166	DTNA	t	g	338	-0.137	+-	0.8913	0.968099
	White_Matter_Volume	Cross-Sectional	rs45556134	18	34729425	DTNA	a	g	338	0.747	++	0.4552	0.968099
	White_Matter_Volume	Cross-Sectional	rs899828	18	34732688	DTNA	t	g	338	0.458	-+	0.647	0.968099
	White_Matter_Volume	Cross-Sectional	rs17556884	18	34736455	DTNA	t	c	338	0.983	-+	0.3258	0.968099
	White_Matter_Volume	Cross-Sectional	rs1480428	18	34738732	DTNA	a	g	338	0.234	-+	0.8153	0.968099
	White_Matter_Volume	Cross-Sectional	rs12957349	18	34739291	DTNA	t	c	338	0.503	-+	0.615	0.968099
	White_Matter_Volume	Cross-Sectional	rs12608110	18	34752198	DTNA	a	g	338	1.936	-+	0.05291	0.906084
	White_Matter_Volume	Cross-Sectional	rs7228547	18	34760039	DTNA	a	g	338	-0.221	+-	0.8252	0.968099
	White_Matter_Volume	Cross-Sectional	rs8099437	18	34761448	DTNA	t	g	338	-0.102	-+	0.9191	0.968099
	White_Matter_Volume	Cross-Sectional	rs72955132	18	34762382	DTNA	a	g	338	0.869	-+	0.3851	0.968099
	White_Matter_Volume	Cross-Sectional	rs1817452	18	34776629	DTNA	t	c	338	0.456	-+	0.6487	0.968099
	White_Matter_Volume	Cross-Sectional	rs56404226	18	34778060	DTNA	a	g	338	-1.502	+-	0.1331	0.968099
	White_Matter_Volume	Cross-Sectional	rs72955175	18	34779045	DTNA	a	t	338	-0.067	+-	0.9469	0.968099
	White_Matter_Volume	Cross-Sectional	rs12608251	18	34782906	DTNA	t	g	338	0.549	-+	0.5832	0.968099
	White_Matter_Volume	Cross-Sectional	rs76880720	18	34791141	DTNA	a	c	338	-0.499	+-	0.6178	0.968099
	White_Matter_Volume	Cross-Sectional	rs9989533	18	34793909	DTNA	t	c	338	0.727	-+	0.4673	0.968099
	White_Matter_Volume	Cross-Sectional	rs79500711	18	34794379	DTNA	a	g	338	-0.578	--	0.5629	0.968099
	White_Matter_Volume	Cross-Sectional	rs138856611	18	34801684	DTNA	t	g	338	1.027	++	0.3046	0.968099
	White_Matter_Volume	Cross-Sectional	rs62097226	18	34804223	DTNA	a	t	338	-0.587	--	0.5575	0.968099
	White_Matter_Volume	Cross-Sectional	rs4458079	18	34806161	DTNA	t	c	338	-0.639	--	0.5225	0.968099
	White_Matter_Volume	Cross-Sectional	rs8086358	18	34813672	DTNA	t	g	338	-0.778	--	0.4368	0.968099
	White_Matter_Volume	Cross-Sectional	rs72963047	18	34818804	DTNA	a	c	338	-0.142	--	0.8868	0.968099
	White_Matter_Volume	Cross-Sectional	rs17557660	18	34831178	DTNA	a	t	338	1.264	-+	0.2061	0.968099
	White_Matter_Volume	Cross-Sectional	rs1790533	18	34831631	DTNA	a	g	338	0.005	-+	0.9963	0.9963
	White_Matter_Volume	Cross-Sectional	rs4799782	18	34841123	DTNA	a	g	338	-1.252	--	0.2106	0.968099
	White_Matter_Volume	Cross-Sectional	rs1786604	18	34846264	DTNA	a	g	338	0.51	++	0.6102	0.968099
	White_Matter_Volume	Cross-Sectional	rs7233779	18	34863262	DTNA	a	g	338	0.668	-+	0.5039	0.968099
	White_Matter_Volume	Cross-Sectional	rs644982	18	34869793	DTNA	a	g	338	-1.206	--	0.2278	0.968099
	White_Matter_Volume	Cross-Sectional	rs11659517	18	34870978	DTNA	a	t	338	0.617	-+	0.5373	0.968099
	White_Matter_Volume	Cross-Sectional	rs524969	18	34872102	DTNA	a	t	338	0.323	++	0.7468	0.968099
	White_Matter_Volume	Cross-Sectional	rs637914	18	34876135	DTNA	a	t	338	0.695	-+	0.4872	0.968099
	White_Matter_Volume	Cross-Sectional	rs9304141	18	34879143	DTNA	t	c	338	-0.569	+-	0.5694	0.968099
	White_Matter_Volume	Cross-Sectional	rs2288085	18	34879740	DTNA	a	g	338	-0.922	+-	0.3563	0.968099
	White_Matter_Volume	Cross-Sectional	rs17558116	18	34882719	DTNA	t	c	338	-0.086	-+	0.9314	0.968099
	White_Matter_Volume	Cross-Sectional	rs10502637	18	34890006	DTNA	t	c	338	0.321	-+	0.7483	0.968099
	White_Matter_Volume	Cross-Sectional	rs149163416	18	34898841	DTNA	a	g	338	1.121	-+	0.2624	0.968099
	White_Matter_Volume	Cross-Sectional	20:33413780	20	33413780	SNTA1	a	t	338	0.332	+-	0.7399	0.968099
	White_Matter_Volume	Cross-Sectional	rs291683	20	33431611	SNTA1	t	c	338	0.892	++	0.3723	0.968099
	White_Matter_Volume	Cross-Sectional	20:33433270	20	33433270	SNTA1	t	c	338	0.565	++	0.5719	0.968099
	White_Matter_Volume	Cross-Sectional	rs6141396	20	33436147	SNTA1	a	c	93	0.699	+?	0.4847	0.968099
	White_Matter_Volume	Cross-Sectional	rs293721	20	33441633	SNTA1	t	c	338	-2.229	--	0.02583	0.906084
	White_Matter_Volume	Longitudinal	rs111599092	3	49465346	DAG1	a	g	111	-0.629	+-	0.5293	0.750997
	White_Matter_Volume	Longitudinal	rs73073015	3	49465733	DAG1	a	g	111	-0.568	--	0.5701	0.750997
	White_Matter_Volume	Longitudinal	rs7611164	3	49471395	DAG1	t	g	111	-0.189	-+	0.8504	0.917361
	White_Matter_Volume	Longitudinal	rs1568661	3	49483525	DAG1	a	g	111	2.673	++	0.007517	0.147138
	White_Matter_Volume	Longitudinal	rs7374731	3	49495661	DAG1	c	g	111	0.57	++	0.5684	0.750997
	White_Matter_Volume	Longitudinal	rs73074811	3	49516098	DAG1	a	t	111	-1.141	-+	0.2538	0.620904
	White_Matter_Volume	Longitudinal	rs3870338	3	49519618	DAG1	a	g	111	2.673	++	0.007517	0.147138
	White_Matter_Volume	Longitudinal	rs55935606	3	49528072	DAG1	a	g	111	-0.929	--	0.3531	0.671871
	White_Matter_Volume	Longitudinal	rs75153130	3	49530436	DAG1	a	c	111	0.189	+-	0.8504	0.917361
	White_Matter_Volume	Longitudinal	rs13079082	3	49537375	DAG1	c	g	111	-0.463	-+	0.6433	0.816038
	White_Matter_Volume	Longitudinal	rs4052546	3	49538116	DAG1	c	g	111	-0.57	--	0.5684	0.750997
	White_Matter_Volume	Longitudinal	rs73074830	3	49539584	DAG1	a	c	111	0.72	-+	0.4714	0.737417
	White_Matter_Volume	Longitudinal	rs114093899	3	49539955	DAG1	c	g	111	-0.168	--	0.8666	0.927533
	White_Matter_Volume	Longitudinal	rs9789109	18	26842291	AQP4	a	g	111	0.514	+-	0.6071	0.783205
	White_Matter_Volume	Longitudinal	rs10164026	18	26842362	AQP4	a	c	111	-0.339	-+	0.7348	0.861695
	White_Matter_Volume	Longitudinal	rs4800270	18	26844933	AQP4	t	g	111	0.25	-+	0.8024	0.895251
	White_Matter_Volume	Longitudinal	rs79668602	18	26845488	AQP4	a	g	111	1.592	++	0.1114	0.439482
	White_Matter_Volume	Longitudinal	rs12458416	18	26847267	AQP4	c	g	111	0.815	++	0.4148	0.72003
	White_Matter_Volume	Longitudinal	rs12953446	18	26848521	AQP4	a	g	111	0.603	++	0.5468	0.750997
	White_Matter_Volume	Longitudinal	rs67461489	18	26848876	AQP4	t	c	111	-0.959	--	0.3375	0.658951
	White_Matter_Volume	Longitudinal	rs11661081	18	26850068	AQP4	a	c	111	-0.965	+-	0.3347	0.658951
	White_Matter_Volume	Longitudinal	rs3763043	18	26855854	AQP4	t	c	111	0.001	-+	0.9996	0.9996
	White_Matter_Volume	Longitudinal	rs68006382	18	26856555	AQP4	a	g	111	-0.295	+-	0.7681	0.876914
	White_Matter_Volume	Longitudinal	rs335930	18	26856961	AQP4	a	c	111	-0.882	--	0.3779	0.676104
	White_Matter_Volume	Longitudinal	rs71353405	18	26857429	AQP4	t	c	111	-0.051	-+	0.9597	0.981186
	White_Matter_Volume	Longitudinal	rs162009	18	26864250	AQP4	a	g	111	1.43	++	0.1527	0.463517
	White_Matter_Volume	Longitudinal	rs4800773	18	26865017	AQP4	a	g	111	-0.316	+-	0.7523	0.866093
	White_Matter_Volume	Longitudinal	rs3875089	18	26865469	AQP4	t	c	111	-0.912	+-	0.3616	0.676104
	White_Matter_Volume	Longitudinal	rs72878787	18	26866517	AQP4	a	g	111	0.895	-+	0.3709	0.676104
	White_Matter_Volume	Longitudinal	rs162006	18	26866570	AQP4	t	c	111	1.747	++	0.08058	0.387096
	White_Matter_Volume	Longitudinal	rs151244	18	26866755	AQP4	t	c	111	-1.042	-+	0.2972	0.658951
	White_Matter_Volume	Longitudinal	rs72878794	18	26866839	AQP4	t	c	111	-1.33	--	0.1837	0.51361
	White_Matter_Volume	Longitudinal	rs9961118	18	26866901	AQP4	t	c	111	-0.341	+-	0.7328	0.861695
	White_Matter_Volume	Longitudinal	rs162004	18	26867972	AQP4	c	g	111	-0.396	-+	0.6924	0.854584
	White_Matter_Volume	Longitudinal	rs72878799	18	26868165	AQP4	a	g	111	-0.132	-+	0.895	0.943192
	White_Matter_Volume	Longitudinal	rs11662318	18	26869056	AQP4	t	c	111	0.631	-+	0.5281	0.750997
	White_Matter_Volume	Longitudinal	rs151246	18	26869139	AQP4	t	g	111	-0.687	-+	0.492	0.737417
	White_Matter_Volume	Longitudinal	rs491148	18	26869803	AQP4	a	g	111	-0.737	+-	0.4609	0.737417
	White_Matter_Volume	Longitudinal	rs162002	18	26871015	AQP4	a	g	111	-1.74	+-	0.08194	0.387096
	White_Matter_Volume	Longitudinal	rs162001	18	26871481	AQP4	a	c	111	1.178	++	0.2388	0.594829
	White_Matter_Volume	Longitudinal	rs3865411	18	26871684	AQP4	a	g	111	-1.187	+-	0.2353	0.594829
	White_Matter_Volume	Longitudinal	rs162000	18	26872471	AQP4	a	c	111	-0.337	+-	0.7359	0.861695
	White_Matter_Volume	Longitudinal	rs12969503	18	26873564	AQP4	t	g	111	-0.027	--	0.9787	0.993199
	White_Matter_Volume	Longitudinal	rs8094228	18	26873767	AQP4	t	c	111	-0.715	--	0.4743	0.737417
	White_Matter_Volume	Longitudinal	rs480647	18	26874290	AQP4	t	c	111	-2.392	--	0.01678	0.250573
	White_Matter_Volume	Longitudinal	rs10502478	18	26874616	AQP4	a	c	111	0.815	-+	0.4152	0.72003
	White_Matter_Volume	Longitudinal	rs7234562	18	34483685	DTNA	t	c	111	-1.917	--	0.05522	0.332453
	White_Matter_Volume	Longitudinal	rs79922046	18	34485536	DTNA	a	g	111	-1.017	--	0.3092	0.658951
	White_Matter_Volume	Longitudinal	rs9955950	18	34485672	DTNA	t	c	111	0.079	-+	0.9371	0.980021
	White_Matter_Volume	Longitudinal	rs12957028	18	34485948	DTNA	a	g	111	0.892	-+	0.3723	0.676104
	White_Matter_Volume	Longitudinal	rs72639491	18	34491438	DTNA	a	g	111	-0.704	--	0.4812	0.737417
	White_Matter_Volume	Longitudinal	rs62097347	18	34492032	DTNA	c	g	111	-0.785	+-	0.4326	0.724262
	White_Matter_Volume	Longitudinal	rs9961251	18	34492344	DTNA	t	c	111	-1.484	+-	0.1378	0.460454
	White_Matter_Volume	Longitudinal	rs111846993	18	34494001	DTNA	t	c	111	-1.436	--	0.151	0.463517
	White_Matter_Volume	Longitudinal	rs4799769	18	34494577	DTNA	c	g	111	0.009	+-	0.9925	0.9996
	White_Matter_Volume	Longitudinal	rs8092794	18	34496273	DTNA	a	g	111	-0.06	-+	0.9519	0.981186
	White_Matter_Volume	Longitudinal	rs7243528	18	34497055	DTNA	t	c	111	-0.783	--	0.4335	0.724262
	White_Matter_Volume	Longitudinal	rs79972565	18	34497194	DTNA	t	g	111	-1.12	--	0.2629	0.631145
	White_Matter_Volume	Longitudinal	rs35839923	18	34497764	DTNA	a	g	111	1.096	+-	0.2729	0.633683
	White_Matter_Volume	Longitudinal	rs62097349	18	34499519	DTNA	a	g	111	1.662	++	0.09653	0.422046
	White_Matter_Volume	Longitudinal	rs9965622	18	34502153	DTNA	t	c	111	-0.644	--	0.5197	0.750997
	White_Matter_Volume	Longitudinal	rs62098462	18	34504364	DTNA	t	c	111	1.187	-+	0.2354	0.594829
	White_Matter_Volume	Longitudinal	rs75127284	18	34506592	DTNA	a	c	111	1.062	++	0.2881	0.657828
	White_Matter_Volume	Longitudinal	rs2439861	18	34507940	DTNA	a	g	111	-1.652	--	0.09858	0.422046
	White_Matter_Volume	Longitudinal	rs35982920	18	34516411	DTNA	a	g	111	-1.397	--	0.1624	0.463517
	White_Matter_Volume	Longitudinal	rs2509597	18	34528430	DTNA	a	t	111	-2.464	--	0.01374	0.235297
	White_Matter_Volume	Longitudinal	rs71363449	18	34531997	DTNA	t	c	111	1.494	+-	0.1352	0.460454
	White_Matter_Volume	Longitudinal	rs2439853	18	34533937	DTNA	a	g	111	2.36	++	0.01829	0.250573
	White_Matter_Volume	Longitudinal	rs2439000	18	34536414	DTNA	c	g	111	-1.435	--	0.1513	0.463517
	White_Matter_Volume	Longitudinal	rs11875892	18	34544032	DTNA	a	g	111	1.399	++	0.1619	0.463517
	White_Matter_Volume	Longitudinal	rs1967583	18	34544573	DTNA	t	c	111	-0.425	--	0.671	0.843297
	White_Matter_Volume	Longitudinal	rs28856895	18	34555507	DTNA	a	g	111	2.089	++	0.03668	0.306195
	White_Matter_Volume	Longitudinal	rs77973497	18	34560529	DTNA	a	c	111	0.553	-+	0.5801	0.756892
	White_Matter_Volume	Longitudinal	rs2579796	18	34569243	DTNA	a	g	111	2.883	++	0.003936	0.147138
	White_Matter_Volume	Longitudinal	rs2579797	18	34571732	DTNA	t	g	111	1.435	++	0.1513	0.463517
	White_Matter_Volume	Longitudinal	rs2685557	18	34576782	DTNA	t	c	111	2.883	++	0.003936	0.147138
	White_Matter_Volume	Longitudinal	rs9958492	18	34577783	DTNA	t	c	111	2.098	++	0.03592	0.306195
	White_Matter_Volume	Longitudinal	rs2579802	18	34579787	DTNA	a	c	111	0.639	-+	0.5231	0.750997
	White_Matter_Volume	Longitudinal	rs74920018	18	34607557	DTNA	a	t	111	0.245	-+	0.8062	0.895251
	White_Matter_Volume	Longitudinal	rs1439127	18	34607759	DTNA	a	t	111	0.878	-+	0.38	0.676104
	White_Matter_Volume	Longitudinal	rs12327368	18	34611361	DTNA	a	g	111	2.098	++	0.03592	0.306195
	White_Matter_Volume	Longitudinal	rs62097188	18	34611412	DTNA	a	g	111	1.828	++	0.06759	0.356147
	White_Matter_Volume	Longitudinal	rs9807153	18	34635520	DTNA	a	t	111	-0.951	-+	0.3415	0.658951
	White_Matter_Volume	Longitudinal	rs2730126	18	34635939	DTNA	a	c	111	2.138	++	0.03248	0.306195
	White_Matter_Volume	Longitudinal	rs1659526	18	34644451	DTNA	a	g	111	0.615	-+	0.5387	0.750997
	White_Matter_Volume	Longitudinal	rs17642885	18	34649976	DTNA	t	c	111	-1.198	+-	0.2308	0.594829
	White_Matter_Volume	Longitudinal	rs1240974	18	34650949	DTNA	t	c	111	1.706	-+	0.08809	0.402278
	White_Matter_Volume	Longitudinal	rs55869511	18	34651262	DTNA	a	c	111	-2.069	--	0.03854	0.306195
	White_Matter_Volume	Longitudinal	rs12955208	18	34656737	DTNA	a	g	111	-0.688	--	0.4913	0.737417
	White_Matter_Volume	Longitudinal	rs72953203	18	34660068	DTNA	a	g	111	-1.109	--	0.2672	0.631145
	White_Matter_Volume	Longitudinal	rs9946070	18	34665505	DTNA	a	g	111	2.746	++	0.006033	0.147138
	White_Matter_Volume	Longitudinal	rs72953211	18	34673381	DTNA	a	c	111	-1.947	--	0.05152	0.332453
	White_Matter_Volume	Longitudinal	rs55971592	18	34697328	DTNA	a	g	111	-0.572	--	0.5675	0.750997
	White_Matter_Volume	Longitudinal	rs78837792	18	34703359	DTNA	t	c	111	1.279	++	0.2009	0.550466
	White_Matter_Volume	Longitudinal	rs11663468	18	34707936	DTNA	t	c	111	1.557	-+	0.1195	0.439482
	White_Matter_Volume	Longitudinal	rs12963825	18	34709484	DTNA	a	g	111	1.96	+-	0.05002	0.332453
	White_Matter_Volume	Longitudinal	rs1480432	18	34727166	DTNA	t	g	111	1.593	++	0.1113	0.439482
	White_Matter_Volume	Longitudinal	rs45556134	18	34729425	DTNA	a	g	111	1.969	++	0.04901	0.332453
	White_Matter_Volume	Longitudinal	rs899828	18	34732688	DTNA	t	g	111	0.21	++	0.834	0.914064
	White_Matter_Volume	Longitudinal	rs17556884	18	34736455	DTNA	t	c	111	-2.051	-+	0.04023	0.306195
	White_Matter_Volume	Longitudinal	rs1480428	18	34738732	DTNA	a	g	111	-2.673	--	0.007518	0.147138
	White_Matter_Volume	Longitudinal	rs12957349	18	34739291	DTNA	t	c	111	-0.688	--	0.4913	0.737417
	White_Matter_Volume	Longitudinal	rs12608110	18	34752198	DTNA	a	g	111	0.787	++	0.4313	0.724262
	White_Matter_Volume	Longitudinal	rs7228547	18	34760039	DTNA	a	g	111	-1.557	+-	0.1195	0.439482
	White_Matter_Volume	Longitudinal	rs8099437	18	34761448	DTNA	t	g	111	-2.673	--	0.007518	0.147138
	White_Matter_Volume	Longitudinal	rs72955132	18	34762382	DTNA	a	g	111	-2.051	-+	0.04023	0.306195
	White_Matter_Volume	Longitudinal	rs1817452	18	34776629	DTNA	t	c	111	-0.576	--	0.5646	0.750997
	White_Matter_Volume	Longitudinal	rs56404226	18	34778060	DTNA	a	g	111	-0.693	--	0.4884	0.737417
	White_Matter_Volume	Longitudinal	rs72955175	18	34779045	DTNA	a	t	111	-1.568	--	0.1169	0.439482
	White_Matter_Volume	Longitudinal	rs12608251	18	34782906	DTNA	t	g	111	0.975	++	0.3297	0.658951
	White_Matter_Volume	Longitudinal	rs76880720	18	34791141	DTNA	a	c	111	0.337	-+	0.7358	0.861695
	White_Matter_Volume	Longitudinal	rs9989533	18	34793909	DTNA	t	c	111	0.249	++	0.8033	0.895251
	White_Matter_Volume	Longitudinal	rs79500711	18	34794379	DTNA	a	g	111	-1.404	--	0.1604	0.463517
	White_Matter_Volume	Longitudinal	rs138856611	18	34801684	DTNA	t	g	111	0.508	++	0.6117	0.783205
	White_Matter_Volume	Longitudinal	rs62097226	18	34804223	DTNA	a	t	111	-0.416	-+	0.6771	0.843297
	White_Matter_Volume	Longitudinal	rs4458079	18	34806161	DTNA	t	c	111	-1.9	--	0.05742	0.332453
	White_Matter_Volume	Longitudinal	rs8086358	18	34813672	DTNA	t	g	111	1.486	++	0.1374	0.460454
	White_Matter_Volume	Longitudinal	rs72963047	18	34818804	DTNA	a	c	111	0.617	-+	0.5373	0.750997
	White_Matter_Volume	Longitudinal	rs17557660	18	34831178	DTNA	a	t	111	-0.328	-+	0.7427	0.862287
	White_Matter_Volume	Longitudinal	rs1790533	18	34831631	DTNA	a	g	111	0.979	++	0.3277	0.658951
	White_Matter_Volume	Longitudinal	rs4799782	18	34841123	DTNA	a	g	111	-0.682	--	0.4952	0.737417
	White_Matter_Volume	Longitudinal	rs1786604	18	34846264	DTNA	a	g	111	-1.547	--	0.1219	0.439482
	White_Matter_Volume	Longitudinal	rs7233779	18	34863262	DTNA	a	g	111	1.84	++	0.0657	0.356147
	White_Matter_Volume	Longitudinal	rs644982	18	34869793	DTNA	a	g	111	0.986	++	0.324	0.658951
	White_Matter_Volume	Longitudinal	rs11659517	18	34870978	DTNA	a	t	111	-0.24	+-	0.8103	0.895251
	White_Matter_Volume	Longitudinal	rs524969	18	34872102	DTNA	a	t	111	-0.966	--	0.3342	0.658951
	White_Matter_Volume	Longitudinal	rs637914	18	34876135	DTNA	a	t	111	-1.001	--	0.3168	0.658951
	White_Matter_Volume	Longitudinal	rs9304141	18	34879143	DTNA	t	c	111	0.056	+-	0.9551	0.981186
	White_Matter_Volume	Longitudinal	rs2288085	18	34879740	DTNA	a	g	111	1.032	++	0.3022	0.658951
	White_Matter_Volume	Longitudinal	rs17558116	18	34882719	DTNA	t	c	111	-0.382	-+	0.7024	0.859186
	White_Matter_Volume	Longitudinal	rs10502637	18	34890006	DTNA	t	c	111	-0.338	+-	0.7353	0.861695
	White_Matter_Volume	Longitudinal	rs149163416	18	34898841	DTNA	a	g	111	-0.154	-+	0.8775	0.931919
	White_Matter_Volume	Longitudinal	20:33413780	20	33413780	SNTA1	a	t	111	-1.76	--	0.07836	0.387096
	White_Matter_Volume	Longitudinal	rs291683	20	33431611	SNTA1	t	c	111	-2.166	--	0.03029	0.306195
	White_Matter_Volume	Longitudinal	20:33433270	20	33433270	SNTA1	t	c	111	1.249	++	0.2118	0.568953
	White_Matter_Volume	Longitudinal	rs6141396	20	33436147	SNTA1	a	c	47	1.894	+?	0.05824	0.332453
	White_Matter_Volume	Longitudinal	rs293721	20	33441633	SNTA1	t	c	111	0.771	++	0.4406	0.727255

## Sheet: Table S9
Supplementary Table 9: Meta-Analysis of linear regression results in Aβ- participants (recessive genetic model)
	Outcome	Model	SNP	CHROM	POS	Gene_Symbol	Allele1	Allele2	Weight	Zscore	Direction	P	FDR_P
	Centiloid	Cross-Sectional	rs111599092	3	49465346	DAG1	a	g	353	-0.262	+-	0.7935	0.931739
	Centiloid	Cross-Sectional	rs73073015	3	49465733	DAG1	a	g	353	0.63	+-	0.5287	0.931739
	Centiloid	Cross-Sectional	rs7611164	3	49471395	DAG1	t	g	353	-0.702	+-	0.4825	0.931739
	Centiloid	Cross-Sectional	rs1568661	3	49483525	DAG1	a	g	353	2.049	++	0.04047	0.931739
	Centiloid	Cross-Sectional	rs7374731	3	49495661	DAG1	c	g	353	-0.801	--	0.4229	0.931739
	Centiloid	Cross-Sectional	rs73074811	3	49516098	DAG1	a	t	353	-0.723	--	0.4698	0.931739
	Centiloid	Cross-Sectional	rs3870338	3	49519618	DAG1	a	g	353	2.049	++	0.04047	0.931739
	Centiloid	Cross-Sectional	rs55935606	3	49528072	DAG1	a	g	353	-1.106	--	0.2686	0.931739
	Centiloid	Cross-Sectional	rs75153130	3	49530436	DAG1	a	c	353	0.702	-+	0.4825	0.931739
	Centiloid	Cross-Sectional	rs13079082	3	49537375	DAG1	c	g	353	0.829	-+	0.4073	0.931739
	Centiloid	Cross-Sectional	rs4052546	3	49538116	DAG1	c	g	353	0.801	++	0.4229	0.931739
	Centiloid	Cross-Sectional	rs73074830	3	49539584	DAG1	a	c	353	1.248	-+	0.212	0.931739
	Centiloid	Cross-Sectional	rs114093899	3	49539955	DAG1	c	g	246	0.474	?+	0.6356	0.931739
	Centiloid	Cross-Sectional	rs9789109	18	26842291	AQP4	a	g	353	0.728	-+	0.4668	0.931739
	Centiloid	Cross-Sectional	rs10164026	18	26842362	AQP4	a	c	353	-0.418	+-	0.6757	0.931739
	Centiloid	Cross-Sectional	rs4800270	18	26844933	AQP4	t	g	353	-1.007	--	0.3137	0.931739
	Centiloid	Cross-Sectional	rs79668602	18	26845488	AQP4	a	g	246	1.492	?+	0.1356	0.931739
	Centiloid	Cross-Sectional	rs12458416	18	26847267	AQP4	c	g	246	-1.745	?-	0.08097	0.931739
	Centiloid	Cross-Sectional	rs12953446	18	26848521	AQP4	a	g	353	-0.816	--	0.4146	0.931739
	Centiloid	Cross-Sectional	rs67461489	18	26848876	AQP4	t	c	353	-1.023	-+	0.3061	0.931739
	Centiloid	Cross-Sectional	rs11661081	18	26850068	AQP4	a	c	246	1.343	?+	0.1794	0.931739
	Centiloid	Cross-Sectional	rs3763043	18	26855854	AQP4	t	c	353	1.462	++	0.1438	0.931739
	Centiloid	Cross-Sectional	rs68006382	18	26856555	AQP4	a	g	353	-2.106	--	0.0352	0.931739
	Centiloid	Cross-Sectional	rs335930	18	26856961	AQP4	a	c	353	0.621	+-	0.5347	0.931739
	Centiloid	Cross-Sectional	rs71353405	18	26857429	AQP4	t	c	246	0.484	?+	0.6281	0.931739
	Centiloid	Cross-Sectional	rs162009	18	26864250	AQP4	a	g	353	-0.256	+-	0.7977	0.931739
	Centiloid	Cross-Sectional	rs4800773	18	26865017	AQP4	a	g	353	0.63	++	0.5285	0.931739
	Centiloid	Cross-Sectional	rs3875089	18	26865469	AQP4	t	c	353	0.523	-+	0.6011	0.931739
	Centiloid	Cross-Sectional	rs72878787	18	26866517	AQP4	a	g	246	-0.885	?-	0.3764	0.931739
	Centiloid	Cross-Sectional	rs162006	18	26866570	AQP4	t	c	353	-1.107	--	0.2681	0.931739
	Centiloid	Cross-Sectional	rs151244	18	26866755	AQP4	t	c	353	-1.104	+-	0.2696	0.931739
	Centiloid	Cross-Sectional	rs72878794	18	26866839	AQP4	t	c	353	0.346	-+	0.729	0.931739
	Centiloid	Cross-Sectional	rs9961118	18	26866901	AQP4	t	c	107	0.985	+?	0.3248	0.931739
	Centiloid	Cross-Sectional	rs162004	18	26867972	AQP4	c	g	353	2.037	++	0.04162	0.931739
	Centiloid	Cross-Sectional	rs72878799	18	26868165	AQP4	a	g	353	-1.587	+-	0.1125	0.931739
	Centiloid	Cross-Sectional	rs11662318	18	26869056	AQP4	t	c	353	1.86	++	0.06292	0.931739
	Centiloid	Cross-Sectional	rs151246	18	26869139	AQP4	t	g	353	1.412	++	0.1581	0.931739
	Centiloid	Cross-Sectional	rs491148	18	26869803	AQP4	a	g	353	-0.918	--	0.3589	0.931739
	Centiloid	Cross-Sectional	rs162002	18	26871015	AQP4	a	g	353	-0.815	--	0.4151	0.931739
	Centiloid	Cross-Sectional	rs162001	18	26871481	AQP4	a	c	353	-0.955	--	0.3398	0.931739
	Centiloid	Cross-Sectional	rs3865411	18	26871684	AQP4	a	g	353	-0.601	--	0.5475	0.931739
	Centiloid	Cross-Sectional	rs162000	18	26872471	AQP4	a	c	353	-1.896	--	0.05799	0.931739
	Centiloid	Cross-Sectional	rs12969503	18	26873564	AQP4	t	g	353	-2.257	--	0.024	0.931739
	Centiloid	Cross-Sectional	rs8094228	18	26873767	AQP4	t	c	353	1.209	++	0.2267	0.931739
	Centiloid	Cross-Sectional	rs480647	18	26874290	AQP4	t	c	353	-0.161	+-	0.8718	0.93457
	Centiloid	Cross-Sectional	rs10502478	18	26874616	AQP4	a	c	353	-0.781	--	0.4347	0.931739
	Centiloid	Cross-Sectional	rs7234562	18	34483685	DTNA	t	c	353	1.148	++	0.2511	0.931739
	Centiloid	Cross-Sectional	rs79922046	18	34485536	DTNA	a	g	353	1.281	++	0.2001	0.931739
	Centiloid	Cross-Sectional	rs9955950	18	34485672	DTNA	t	c	353	-0.324	-+	0.7458	0.931739
	Centiloid	Cross-Sectional	rs12957028	18	34485948	DTNA	a	g	353	-0.804	--	0.4215	0.931739
	Centiloid	Cross-Sectional	rs72639491	18	34491438	DTNA	a	g	353	1.307	++	0.191	0.931739
	Centiloid	Cross-Sectional	rs62097347	18	34492032	DTNA	c	g	353	0.001	+-	0.9991	0.9991
	Centiloid	Cross-Sectional	rs9961251	18	34492344	DTNA	t	c	353	-0.898	--	0.3691	0.931739
	Centiloid	Cross-Sectional	rs111846993	18	34494001	DTNA	t	c	353	-0.272	--	0.786	0.931739
	Centiloid	Cross-Sectional	rs4799769	18	34494577	DTNA	c	g	353	1.127	+-	0.2597	0.931739
	Centiloid	Cross-Sectional	rs8092794	18	34496273	DTNA	a	g	353	0.169	+-	0.8661	0.93457
	Centiloid	Cross-Sectional	rs7243528	18	34497055	DTNA	t	c	246	0.294	?+	0.7691	0.931739
	Centiloid	Cross-Sectional	rs79972565	18	34497194	DTNA	t	g	246	0.191	?+	0.8483	0.931739
	Centiloid	Cross-Sectional	rs35839923	18	34497764	DTNA	a	g	353	-0.998	--	0.3182	0.931739
	Centiloid	Cross-Sectional	rs62097349	18	34499519	DTNA	a	g	353	-0.578	+-	0.5631	0.931739
	Centiloid	Cross-Sectional	rs9965622	18	34502153	DTNA	t	c	353	0.41	++	0.6816	0.931739
	Centiloid	Cross-Sectional	rs62098462	18	34504364	DTNA	t	c	246	-0.374	?-	0.7085	0.931739
	Centiloid	Cross-Sectional	rs75127284	18	34506592	DTNA	a	c	246	-0.232	?-	0.8165	0.931739
	Centiloid	Cross-Sectional	rs2439861	18	34507940	DTNA	a	g	246	0.239	?+	0.811	0.931739
	Centiloid	Cross-Sectional	rs2509597	18	34528430	DTNA	a	t	353	-0.103	-+	0.9178	0.946865
	Centiloid	Cross-Sectional	rs71363449	18	34531997	DTNA	t	c	246	-1.338	?-	0.1808	0.931739
	Centiloid	Cross-Sectional	rs2439853	18	34533937	DTNA	a	g	353	-0.923	--	0.3562	0.931739
	Centiloid	Cross-Sectional	rs2439000	18	34536414	DTNA	c	g	246	0.294	?+	0.7691	0.931739
	Centiloid	Cross-Sectional	rs1967583	18	34544573	DTNA	t	c	353	-0.637	-+	0.5242	0.931739
	Centiloid	Cross-Sectional	rs28856895	18	34555507	DTNA	a	g	353	-0.918	--	0.3586	0.931739
	Centiloid	Cross-Sectional	rs77973497	18	34560529	DTNA	a	c	246	-0.706	?-	0.4802	0.931739
	Centiloid	Cross-Sectional	rs2579796	18	34569243	DTNA	a	g	353	-0.864	--	0.3875	0.931739
	Centiloid	Cross-Sectional	rs2579797	18	34571732	DTNA	t	g	246	-0.2	?-	0.8417	0.931739
	Centiloid	Cross-Sectional	rs2685557	18	34576782	DTNA	t	c	353	-0.864	--	0.3875	0.931739
	Centiloid	Cross-Sectional	rs9958492	18	34577783	DTNA	t	c	246	-1.338	?-	0.1808	0.931739
	Centiloid	Cross-Sectional	rs2579802	18	34579787	DTNA	a	c	246	0.422	?+	0.6731	0.931739
	Centiloid	Cross-Sectional	rs74920018	18	34607557	DTNA	a	t	246	-0.706	?-	0.4802	0.931739
	Centiloid	Cross-Sectional	rs1439127	18	34607759	DTNA	a	t	353	0.448	-+	0.6539	0.931739
	Centiloid	Cross-Sectional	rs12327368	18	34611361	DTNA	a	g	246	-1.338	?-	0.1808	0.931739
	Centiloid	Cross-Sectional	rs62097188	18	34611412	DTNA	a	g	246	-0.56	?-	0.5758	0.931739
	Centiloid	Cross-Sectional	rs9807153	18	34635520	DTNA	a	t	353	0.943	++	0.3455	0.931739
	Centiloid	Cross-Sectional	rs2730126	18	34635939	DTNA	a	c	353	-0.083	-+	0.9337	0.955082
	Centiloid	Cross-Sectional	rs1659526	18	34644451	DTNA	a	g	246	0.232	?+	0.8164	0.931739
	Centiloid	Cross-Sectional	rs17642885	18	34649976	DTNA	t	c	353	-0.585	+-	0.5584	0.931739
	Centiloid	Cross-Sectional	rs1240974	18	34650949	DTNA	t	c	246	-0.191	?-	0.8483	0.931739
	Centiloid	Cross-Sectional	rs55869511	18	34651262	DTNA	a	c	246	1.19	?+	0.2342	0.931739
	Centiloid	Cross-Sectional	rs12955208	18	34656737	DTNA	a	g	353	-0.657	--	0.5109	0.931739
	Centiloid	Cross-Sectional	rs72953203	18	34660068	DTNA	a	g	353	0.497	+-	0.6194	0.931739
	Centiloid	Cross-Sectional	rs9946070	18	34665505	DTNA	a	g	353	-0.603	--	0.5466	0.931739
	Centiloid	Cross-Sectional	rs72953211	18	34673381	DTNA	a	c	353	-0.021	-+	0.9832	0.990592
	Centiloid	Cross-Sectional	rs55971592	18	34697328	DTNA	a	g	353	0.339	-+	0.7347	0.931739
	Centiloid	Cross-Sectional	rs78837792	18	34703359	DTNA	t	c	353	0.217	-+	0.8283	0.931739
	Centiloid	Cross-Sectional	rs11663468	18	34707936	DTNA	t	c	353	-0.415	--	0.6784	0.931739
	Centiloid	Cross-Sectional	rs12963825	18	34709484	DTNA	a	g	353	-0.148	+-	0.8822	0.938213
	Centiloid	Cross-Sectional	rs1480432	18	34727166	DTNA	t	g	353	-0.17	+-	0.865	0.93457
	Centiloid	Cross-Sectional	rs45556134	18	34729425	DTNA	a	g	246	-1.147	?-	0.2515	0.931739
	Centiloid	Cross-Sectional	rs17556884	18	34736455	DTNA	t	c	353	0.226	-+	0.8215	0.931739
	Centiloid	Cross-Sectional	rs1480428	18	34738732	DTNA	a	g	353	0.973	++	0.3303	0.931739
	Centiloid	Cross-Sectional	rs12957349	18	34739291	DTNA	t	c	353	-0.657	--	0.5109	0.931739
	Centiloid	Cross-Sectional	rs12608110	18	34752198	DTNA	a	g	353	0.102	-+	0.9186	0.946865
	Centiloid	Cross-Sectional	rs7228547	18	34760039	DTNA	a	g	353	1.052	++	0.293	0.931739
	Centiloid	Cross-Sectional	rs8099437	18	34761448	DTNA	t	g	353	1.429	++	0.1531	0.931739
	Centiloid	Cross-Sectional	rs72955132	18	34762382	DTNA	a	g	353	0.226	-+	0.8215	0.931739
	Centiloid	Cross-Sectional	rs1817452	18	34776629	DTNA	t	c	353	-1.101	--	0.2711	0.931739
	Centiloid	Cross-Sectional	rs56404226	18	34778060	DTNA	a	g	353	0.668	++	0.5039	0.931739
	Centiloid	Cross-Sectional	rs72955175	18	34779045	DTNA	a	t	353	0.405	++	0.6857	0.931739
	Centiloid	Cross-Sectional	rs12608251	18	34782906	DTNA	t	g	353	-0.068	-+	0.9457	0.960029
	Centiloid	Cross-Sectional	rs76880720	18	34791141	DTNA	a	c	353	0.495	++	0.6205	0.931739
	Centiloid	Cross-Sectional	rs9989533	18	34793909	DTNA	t	c	353	-1.199	--	0.2304	0.931739
	Centiloid	Cross-Sectional	rs79500711	18	34794379	DTNA	a	g	353	-0.21	+-	0.8337	0.931739
	Centiloid	Cross-Sectional	rs138856611	18	34801684	DTNA	t	g	246	-1.95	?-	0.05117	0.931739
	Centiloid	Cross-Sectional	rs62097226	18	34804223	DTNA	a	t	107	0.233	+?	0.8158	0.931739
	Centiloid	Cross-Sectional	rs4458079	18	34806161	DTNA	t	c	246	0.111	?+	0.9116	0.946865
	Centiloid	Cross-Sectional	rs8086358	18	34813672	DTNA	t	g	353	-0.405	--	0.6857	0.931739
	Centiloid	Cross-Sectional	rs72963047	18	34818804	DTNA	a	c	353	-0.644	-+	0.5194	0.931739
	Centiloid	Cross-Sectional	rs17557660	18	34831178	DTNA	a	t	107	-0.282	-?	0.7779	0.931739
	Centiloid	Cross-Sectional	rs1790533	18	34831631	DTNA	a	g	353	0.108	-+	0.914	0.946865
	Centiloid	Cross-Sectional	rs4799782	18	34841123	DTNA	a	g	246	1.95	?+	0.05117	0.931739
	Centiloid	Cross-Sectional	rs1786604	18	34846264	DTNA	a	g	353	0.405	++	0.6857	0.931739
	Centiloid	Cross-Sectional	rs7233779	18	34863262	DTNA	a	g	353	-1.254	--	0.2098	0.931739
	Centiloid	Cross-Sectional	rs644982	18	34869793	DTNA	a	g	353	0.245	+-	0.8064	0.931739
	Centiloid	Cross-Sectional	rs11659517	18	34870978	DTNA	a	t	353	-0.872	--	0.3832	0.931739
	Centiloid	Cross-Sectional	rs524969	18	34872102	DTNA	a	t	353	0.359	++	0.7196	0.931739
	Centiloid	Cross-Sectional	rs637914	18	34876135	DTNA	a	t	353	0.346	++	0.7292	0.931739
	Centiloid	Cross-Sectional	rs9304141	18	34879143	DTNA	t	c	353	0.74	-+	0.4592	0.931739
	Centiloid	Cross-Sectional	rs2288085	18	34879740	DTNA	a	g	353	0.514	++	0.6075	0.931739
	Centiloid	Cross-Sectional	rs17558116	18	34882719	DTNA	t	c	353	-1.189	--	0.2343	0.931739
	Centiloid	Cross-Sectional	rs10502637	18	34890006	DTNA	t	c	353	-1.135	--	0.2562	0.931739
	Centiloid	Cross-Sectional	rs149163416	18	34898841	DTNA	a	g	353	0.621	+-	0.5343	0.931739
	Centiloid	Cross-Sectional	20:33413780	20	33413780	SNTA1	a	t	353	0.547	++	0.5845	0.931739
	Centiloid	Cross-Sectional	rs291683	20	33431611	SNTA1	t	c	353	0.194	-+	0.8462	0.931739
	Centiloid	Cross-Sectional	20:33433270	20	33433270	SNTA1	t	c	353	-0.612	--	0.5406	0.931739
	Centiloid	Cross-Sectional	rs6141396	20	33436147	SNTA1	a	c	107	-0.559	-?	0.5765	0.931739
	Centiloid	Cross-Sectional	rs293721	20	33441633	SNTA1	t	c	107	0.684	+?	0.494	0.931739
	Centiloid	Longitudinal	rs111599092	3	49465346	DAG1	a	g	352	1.211	++	0.226	0.720484
	Centiloid	Longitudinal	rs73073015	3	49465733	DAG1	a	g	352	-0.671	--	0.5024	0.896941
	Centiloid	Longitudinal	rs7611164	3	49471395	DAG1	t	g	352	-0.741	--	0.4587	0.878083
	Centiloid	Longitudinal	rs1568661	3	49483525	DAG1	a	g	352	-2.555	--	0.01061	0.473913
	Centiloid	Longitudinal	rs7374731	3	49495661	DAG1	c	g	352	-1.522	--	0.128	0.684656
	Centiloid	Longitudinal	rs73074811	3	49516098	DAG1	a	t	352	1.884	++	0.05959	0.684656
	Centiloid	Longitudinal	rs3870338	3	49519618	DAG1	a	g	352	-2.555	--	0.01061	0.473913
	Centiloid	Longitudinal	rs55935606	3	49528072	DAG1	a	g	352	0.414	++	0.6791	0.927713
	Centiloid	Longitudinal	rs75153130	3	49530436	DAG1	a	c	352	0.741	++	0.4587	0.878083
	Centiloid	Longitudinal	rs13079082	3	49537375	DAG1	c	g	352	-0.96	-+	0.3369	0.806154
	Centiloid	Longitudinal	rs4052546	3	49538116	DAG1	c	g	352	1.522	++	0.128	0.684656
	Centiloid	Longitudinal	rs73074830	3	49539584	DAG1	a	c	352	-1.44	--	0.1499	0.684656
	Centiloid	Longitudinal	rs114093899	3	49539955	DAG1	c	g	246	1.406	?+	0.1598	0.684656
	Centiloid	Longitudinal	rs9789109	18	26842291	AQP4	a	g	352	-1.087	--	0.2768	0.756963
	Centiloid	Longitudinal	rs10164026	18	26842362	AQP4	a	c	352	-0.228	-+	0.8195	0.951284
	Centiloid	Longitudinal	rs4800270	18	26844933	AQP4	t	g	352	-0.755	--	0.45	0.878083
	Centiloid	Longitudinal	rs79668602	18	26845488	AQP4	a	g	246	1.148	?+	0.2509	0.739513
	Centiloid	Longitudinal	rs12458416	18	26847267	AQP4	c	g	246	0.238	?+	0.8121	0.951284
	Centiloid	Longitudinal	rs12953446	18	26848521	AQP4	a	g	352	-1.573	--	0.1156	0.684656
	Centiloid	Longitudinal	rs67461489	18	26848876	AQP4	t	c	352	-0.368	--	0.7125	0.934589
	Centiloid	Longitudinal	rs11661081	18	26850068	AQP4	a	c	246	0.859	?+	0.3902	0.846503
	Centiloid	Longitudinal	rs3763043	18	26855854	AQP4	t	c	352	0.845	-+	0.3982	0.846503
	Centiloid	Longitudinal	rs68006382	18	26856555	AQP4	a	g	352	-0.175	+-	0.8608	0.961227
	Centiloid	Longitudinal	rs335930	18	26856961	AQP4	a	c	352	0.156	+-	0.876	0.970116
	Centiloid	Longitudinal	rs71353405	18	26857429	AQP4	t	c	246	-0.567	?-	0.5707	0.897372
	Centiloid	Longitudinal	rs162009	18	26864250	AQP4	a	g	352	-0.338	--	0.7356	0.934589
	Centiloid	Longitudinal	rs4800773	18	26865017	AQP4	a	g	352	-1.744	--	0.08111	0.684656
	Centiloid	Longitudinal	rs3875089	18	26865469	AQP4	t	c	352	1.538	++	0.124	0.684656
	Centiloid	Longitudinal	rs72878787	18	26866517	AQP4	a	g	246	-1.242	?-	0.2141	0.720484
	Centiloid	Longitudinal	rs162006	18	26866570	AQP4	t	c	352	-1.279	-+	0.2009	0.720484
	Centiloid	Longitudinal	rs151244	18	26866755	AQP4	t	c	352	0.855	++	0.3927	0.846503
	Centiloid	Longitudinal	rs72878794	18	26866839	AQP4	t	c	352	-0.074	+-	0.9411	0.976551
	Centiloid	Longitudinal	rs9961118	18	26866901	AQP4	t	c	106	-0.64	-?	0.5221	0.896941
	Centiloid	Longitudinal	rs162004	18	26867972	AQP4	c	g	352	-0.767	+-	0.4429	0.878083
	Centiloid	Longitudinal	rs72878799	18	26868165	AQP4	a	g	352	0.405	-+	0.6854	0.927713
	Centiloid	Longitudinal	rs11662318	18	26869056	AQP4	t	c	352	0.527	++	0.5985	0.897372
	Centiloid	Longitudinal	rs151246	18	26869139	AQP4	t	g	352	-0.834	--	0.4043	0.846503
	Centiloid	Longitudinal	rs491148	18	26869803	AQP4	a	g	352	0.931	++	0.3517	0.812263
	Centiloid	Longitudinal	rs162002	18	26871015	AQP4	a	g	352	1.731	++	0.08341	0.684656
	Centiloid	Longitudinal	rs162001	18	26871481	AQP4	a	c	352	-0.016	-+	0.9873	0.9873
	Centiloid	Longitudinal	rs3865411	18	26871684	AQP4	a	g	352	-0.352	--	0.7248	0.934589
	Centiloid	Longitudinal	rs162000	18	26872471	AQP4	a	c	352	1.5	++	0.1335	0.684656
	Centiloid	Longitudinal	rs12969503	18	26873564	AQP4	t	g	352	1.197	+-	0.2312	0.720484
	Centiloid	Longitudinal	rs8094228	18	26873767	AQP4	t	c	352	-0.921	-+	0.3568	0.812263
	Centiloid	Longitudinal	rs480647	18	26874290	AQP4	t	c	352	-0.331	+-	0.7405	0.934589
	Centiloid	Longitudinal	rs10502478	18	26874616	AQP4	a	c	352	-0.655	-+	0.5122	0.896941
	Centiloid	Longitudinal	rs7234562	18	34483685	DTNA	t	c	352	-0.801	--	0.4229	0.871825
	Centiloid	Longitudinal	rs79922046	18	34485536	DTNA	a	g	352	-0.42	+-	0.6746	0.927713
	Centiloid	Longitudinal	rs9955950	18	34485672	DTNA	t	c	352	-0.509	--	0.6104	0.897372
	Centiloid	Longitudinal	rs12957028	18	34485948	DTNA	a	g	352	0.392	-+	0.6952	0.931568
	Centiloid	Longitudinal	rs72639491	18	34491438	DTNA	a	g	352	-1.008	--	0.3132	0.7772
	Centiloid	Longitudinal	rs62097347	18	34492032	DTNA	c	g	352	-0.046	+-	0.9631	0.978403
	Centiloid	Longitudinal	rs9961251	18	34492344	DTNA	t	c	352	-0.662	--	0.5082	0.896941
	Centiloid	Longitudinal	rs111846993	18	34494001	DTNA	t	c	352	-1.024	--	0.306	0.77366
	Centiloid	Longitudinal	rs4799769	18	34494577	DTNA	c	g	352	0.708	+-	0.4792	0.896941
	Centiloid	Longitudinal	rs8092794	18	34496273	DTNA	a	g	352	0.084	-+	0.933	0.976551
	Centiloid	Longitudinal	rs7243528	18	34497055	DTNA	t	c	246	0.102	?+	0.9184	0.976551
	Centiloid	Longitudinal	rs79972565	18	34497194	DTNA	t	g	246	1.04	?+	0.2984	0.768954
	Centiloid	Longitudinal	rs35839923	18	34497764	DTNA	a	g	352	-0.331	+-	0.7408	0.934589
	Centiloid	Longitudinal	rs62097349	18	34499519	DTNA	a	g	352	-1.248	--	0.2122	0.720484
	Centiloid	Longitudinal	rs9965622	18	34502153	DTNA	t	c	352	1.121	-+	0.2624	0.739513
	Centiloid	Longitudinal	rs62098462	18	34504364	DTNA	t	c	246	-0.033	?-	0.974	0.981323
	Centiloid	Longitudinal	rs75127284	18	34506592	DTNA	a	c	246	-1.278	?-	0.2013	0.720484
	Centiloid	Longitudinal	rs2439861	18	34507940	DTNA	a	g	246	0.492	?+	0.6225	0.897372
	Centiloid	Longitudinal	rs2509597	18	34528430	DTNA	a	t	352	1.116	++	0.2643	0.739513
	Centiloid	Longitudinal	rs71363449	18	34531997	DTNA	t	c	246	-0.296	?-	0.7672	0.934589
	Centiloid	Longitudinal	rs2439853	18	34533937	DTNA	a	g	352	-0.512	--	0.6083	0.897372
	Centiloid	Longitudinal	rs2439000	18	34536414	DTNA	c	g	246	0.102	?+	0.9184	0.976551
	Centiloid	Longitudinal	rs1967583	18	34544573	DTNA	t	c	352	-1.986	--	0.04698	0.684656
	Centiloid	Longitudinal	rs28856895	18	34555507	DTNA	a	g	352	-0.516	+-	0.6061	0.897372
	Centiloid	Longitudinal	rs77973497	18	34560529	DTNA	a	c	246	0.501	?+	0.6162	0.897372
	Centiloid	Longitudinal	rs2579796	18	34569243	DTNA	a	g	352	-0.538	--	0.5909	0.897372
	Centiloid	Longitudinal	rs2579797	18	34571732	DTNA	t	g	246	-0.119	?-	0.9049	0.976551
	Centiloid	Longitudinal	rs2685557	18	34576782	DTNA	t	c	352	-0.538	--	0.5909	0.897372
	Centiloid	Longitudinal	rs9958492	18	34577783	DTNA	t	c	246	-0.296	?-	0.7672	0.934589
	Centiloid	Longitudinal	rs2579802	18	34579787	DTNA	a	c	246	0.414	?+	0.6787	0.927713
	Centiloid	Longitudinal	rs74920018	18	34607557	DTNA	a	t	246	0.501	?+	0.6162	0.897372
	Centiloid	Longitudinal	rs1439127	18	34607759	DTNA	a	t	352	-0.647	+-	0.5177	0.896941
	Centiloid	Longitudinal	rs12327368	18	34611361	DTNA	a	g	246	-0.296	?-	0.7672	0.934589
	Centiloid	Longitudinal	rs62097188	18	34611412	DTNA	a	g	246	1.115	?+	0.2649	0.739513
	Centiloid	Longitudinal	rs9807153	18	34635520	DTNA	a	t	352	-0.573	+-	0.5664	0.897372
	Centiloid	Longitudinal	rs2730126	18	34635939	DTNA	a	c	352	-0.237	--	0.8124	0.951284
	Centiloid	Longitudinal	rs1659526	18	34644451	DTNA	a	g	246	0.185	?+	0.8536	0.961197
	Centiloid	Longitudinal	rs17642885	18	34649976	DTNA	t	c	352	0.492	-+	0.623	0.897372
	Centiloid	Longitudinal	rs1240974	18	34650949	DTNA	t	c	246	-1.04	?-	0.2984	0.768954
	Centiloid	Longitudinal	rs55869511	18	34651262	DTNA	a	c	246	-0.541	?-	0.5887	0.897372
	Centiloid	Longitudinal	rs12955208	18	34656737	DTNA	a	g	352	1.393	-+	0.1635	0.684656
	Centiloid	Longitudinal	rs72953203	18	34660068	DTNA	a	g	352	2.688	++	0.007182	0.473913
	Centiloid	Longitudinal	rs9946070	18	34665505	DTNA	a	g	352	0.045	-+	0.9638	0.978403
	Centiloid	Longitudinal	rs72953211	18	34673381	DTNA	a	c	352	1.454	++	0.146	0.684656
	Centiloid	Longitudinal	rs55971592	18	34697328	DTNA	a	g	352	-1.474	--	0.1404	0.684656
	Centiloid	Longitudinal	rs78837792	18	34703359	DTNA	t	c	352	-1.403	+-	0.1606	0.684656
	Centiloid	Longitudinal	rs11663468	18	34707936	DTNA	t	c	352	-1.479	--	0.1391	0.684656
	Centiloid	Longitudinal	rs12963825	18	34709484	DTNA	a	g	352	1.291	++	0.1966	0.720484
	Centiloid	Longitudinal	rs1480432	18	34727166	DTNA	t	g	352	0.482	++	0.6295	0.897372
	Centiloid	Longitudinal	rs45556134	18	34729425	DTNA	a	g	246	1.649	?+	0.09905	0.684656
	Centiloid	Longitudinal	rs17556884	18	34736455	DTNA	t	c	352	-1.775	--	0.07597	0.684656
	Centiloid	Longitudinal	rs1480428	18	34738732	DTNA	a	g	352	-0.068	+-	0.946	0.976551
	Centiloid	Longitudinal	rs12957349	18	34739291	DTNA	t	c	352	1.393	-+	0.1635	0.684656
	Centiloid	Longitudinal	rs12608110	18	34752198	DTNA	a	g	352	-0.783	--	0.4339	0.878083
	Centiloid	Longitudinal	rs7228547	18	34760039	DTNA	a	g	352	1.126	++	0.2602	0.739513
	Centiloid	Longitudinal	rs8099437	18	34761448	DTNA	t	g	352	-0.203	+-	0.839	0.960906
	Centiloid	Longitudinal	rs72955132	18	34762382	DTNA	a	g	352	-1.775	--	0.07597	0.684656
	Centiloid	Longitudinal	rs1817452	18	34776629	DTNA	t	c	352	0.914	-+	0.3605	0.812263
	Centiloid	Longitudinal	rs56404226	18	34778060	DTNA	a	g	352	0.585	++	0.5587	0.897372
	Centiloid	Longitudinal	rs72955175	18	34779045	DTNA	a	t	352	1.201	++	0.2299	0.720484
	Centiloid	Longitudinal	rs12608251	18	34782906	DTNA	t	g	352	0.233	++	0.8161	0.951284
	Centiloid	Longitudinal	rs76880720	18	34791141	DTNA	a	c	352	-1.217	+-	0.2235	0.720484
	Centiloid	Longitudinal	rs9989533	18	34793909	DTNA	t	c	352	1.473	++	0.1408	0.684656
	Centiloid	Longitudinal	rs79500711	18	34794379	DTNA	a	g	352	1.969	++	0.04893	0.684656
	Centiloid	Longitudinal	rs138856611	18	34801684	DTNA	t	g	246	1.645	?+	0.09987	0.684656
	Centiloid	Longitudinal	rs62097226	18	34804223	DTNA	a	t	106	0.988	+?	0.323	0.786945
	Centiloid	Longitudinal	rs4458079	18	34806161	DTNA	t	c	246	1.475	?+	0.1401	0.684656
	Centiloid	Longitudinal	rs8086358	18	34813672	DTNA	t	g	352	-1.201	--	0.2299	0.720484
	Centiloid	Longitudinal	rs72963047	18	34818804	DTNA	a	c	352	-1.818	--	0.06899	0.684656
	Centiloid	Longitudinal	rs17557660	18	34831178	DTNA	a	t	106	0.66	+?	0.509	0.896941
	Centiloid	Longitudinal	rs1790533	18	34831631	DTNA	a	g	352	0.409	++	0.6825	0.927713
	Centiloid	Longitudinal	rs4799782	18	34841123	DTNA	a	g	246	-1.645	?-	0.09987	0.684656
	Centiloid	Longitudinal	rs1786604	18	34846264	DTNA	a	g	352	1.201	++	0.2299	0.720484
	Centiloid	Longitudinal	rs7233779	18	34863262	DTNA	a	g	352	-1.469	--	0.1417	0.684656
	Centiloid	Longitudinal	rs644982	18	34869793	DTNA	a	g	352	-1.046	+-	0.2957	0.768954
	Centiloid	Longitudinal	rs11659517	18	34870978	DTNA	a	t	352	0.908	-+	0.3637	0.812263
	Centiloid	Longitudinal	rs524969	18	34872102	DTNA	a	t	352	-0.066	-+	0.9474	0.976551
	Centiloid	Longitudinal	rs637914	18	34876135	DTNA	a	t	352	0.677	-+	0.4986	0.896941
	Centiloid	Longitudinal	rs9304141	18	34879143	DTNA	t	c	352	-0.102	+-	0.9184	0.976551
	Centiloid	Longitudinal	rs2288085	18	34879740	DTNA	a	g	352	-0.069	-+	0.945	0.976551
	Centiloid	Longitudinal	rs17558116	18	34882719	DTNA	t	c	352	0.306	++	0.7599	0.934589
	Centiloid	Longitudinal	rs10502637	18	34890006	DTNA	t	c	352	-1.857	+-	0.0633	0.684656
	Centiloid	Longitudinal	rs149163416	18	34898841	DTNA	a	g	352	0.616	-+	0.5382	0.897372
	Centiloid	Longitudinal	20:33413780	20	33413780	SNTA1	a	t	352	1.637	++	0.1016	0.684656
	Centiloid	Longitudinal	rs291683	20	33431611	SNTA1	t	c	352	0.316	+-	0.7523	0.934589
	Centiloid	Longitudinal	20:33433270	20	33433270	SNTA1	t	c	352	-0.266	-+	0.7904	0.951284
	Centiloid	Longitudinal	rs6141396	20	33436147	SNTA1	a	c	106	-0.187	-?	0.8518	0.961197
	Centiloid	Longitudinal	rs293721	20	33441633	SNTA1	t	c	106	0.223	+?	0.8235	0.951284
	Grey_Matter_Volume	Cross-Sectional	rs111599092	3	49465346	DAG1	a	g	338	-0.615	--	0.5384	0.88643
	Grey_Matter_Volume	Cross-Sectional	rs73073015	3	49465733	DAG1	a	g	338	0.112	-+	0.9111	0.976699
	Grey_Matter_Volume	Cross-Sectional	rs7611164	3	49471395	DAG1	t	g	245	0.381	?+	0.7032	0.916287
	Grey_Matter_Volume	Cross-Sectional	rs1568661	3	49483525	DAG1	a	g	338	1.697	++	0.08971	0.707126
	Grey_Matter_Volume	Cross-Sectional	rs7374731	3	49495661	DAG1	c	g	338	-1.382	--	0.1669	0.88643
	Grey_Matter_Volume	Cross-Sectional	rs73074811	3	49516098	DAG1	a	t	338	0.094	+-	0.9254	0.984156
	Grey_Matter_Volume	Cross-Sectional	rs3870338	3	49519618	DAG1	a	g	338	1.697	++	0.08971	0.707126
	Grey_Matter_Volume	Cross-Sectional	rs55935606	3	49528072	DAG1	a	g	338	1.273	++	0.2032	0.88643
	Grey_Matter_Volume	Cross-Sectional	rs75153130	3	49530436	DAG1	a	c	245	-0.381	?-	0.7032	0.916287
	Grey_Matter_Volume	Cross-Sectional	rs13079082	3	49537375	DAG1	c	g	338	-0.871	--	0.3836	0.88643
	Grey_Matter_Volume	Cross-Sectional	rs4052546	3	49538116	DAG1	c	g	338	1.382	++	0.1669	0.88643
	Grey_Matter_Volume	Cross-Sectional	rs73074830	3	49539584	DAG1	a	c	338	0.804	++	0.4214	0.88643
	Grey_Matter_Volume	Cross-Sectional	rs114093899	3	49539955	DAG1	c	g	245	-0.24	?-	0.8103	0.944176
	Grey_Matter_Volume	Cross-Sectional	rs9789109	18	26842291	AQP4	a	g	338	-0.75	+-	0.4533	0.88643
	Grey_Matter_Volume	Cross-Sectional	rs10164026	18	26842362	AQP4	a	c	338	-0.588	+-	0.5568	0.88643
	Grey_Matter_Volume	Cross-Sectional	rs4800270	18	26844933	AQP4	t	g	338	0.071	-+	0.9433	0.992003
	Grey_Matter_Volume	Cross-Sectional	rs79668602	18	26845488	AQP4	a	g	245	-0.52	?-	0.6028	0.88643
	Grey_Matter_Volume	Cross-Sectional	rs12458416	18	26847267	AQP4	c	g	245	0.27	?+	0.787	0.933257
	Grey_Matter_Volume	Cross-Sectional	rs12953446	18	26848521	AQP4	a	g	338	0.197	-+	0.844	0.966632
	Grey_Matter_Volume	Cross-Sectional	rs67461489	18	26848876	AQP4	t	c	338	-0.494	+-	0.6214	0.88643
	Grey_Matter_Volume	Cross-Sectional	rs11661081	18	26850068	AQP4	a	c	245	-0.38	?-	0.7037	0.916287
	Grey_Matter_Volume	Cross-Sectional	rs3763043	18	26855854	AQP4	t	c	338	-1.575	--	0.1154	0.827979
	Grey_Matter_Volume	Cross-Sectional	rs68006382	18	26856555	AQP4	a	g	338	0.59	-+	0.5554	0.88643
	Grey_Matter_Volume	Cross-Sectional	rs335930	18	26856961	AQP4	a	c	338	1.419	++	0.1559	0.88643
	Grey_Matter_Volume	Cross-Sectional	rs71353405	18	26857429	AQP4	t	c	245	0.71	?+	0.4776	0.88643
	Grey_Matter_Volume	Cross-Sectional	rs162009	18	26864250	AQP4	a	g	338	0.293	++	0.7699	0.929429
	Grey_Matter_Volume	Cross-Sectional	rs4800773	18	26865017	AQP4	a	g	338	0.69	-+	0.49	0.88643
	Grey_Matter_Volume	Cross-Sectional	rs3875089	18	26865469	AQP4	t	c	338	-0.777	--	0.4369	0.88643
	Grey_Matter_Volume	Cross-Sectional	rs72878787	18	26866517	AQP4	a	g	245	0.309	?+	0.7571	0.922285
	Grey_Matter_Volume	Cross-Sectional	rs162006	18	26866570	AQP4	t	c	338	-0.792	--	0.4285	0.88643
	Grey_Matter_Volume	Cross-Sectional	rs151244	18	26866755	AQP4	t	c	338	0.146	+-	0.8836	0.970511
	Grey_Matter_Volume	Cross-Sectional	rs72878794	18	26866839	AQP4	t	c	338	0.366	++	0.7146	0.916287
	Grey_Matter_Volume	Cross-Sectional	rs9961118	18	26866901	AQP4	t	c	93	0.355	+?	0.7228	0.916287
	Grey_Matter_Volume	Cross-Sectional	rs162004	18	26867972	AQP4	c	g	338	-1.01	--	0.3126	0.88643
	Grey_Matter_Volume	Cross-Sectional	rs72878799	18	26868165	AQP4	a	g	338	-1.054	--	0.292	0.88643
	Grey_Matter_Volume	Cross-Sectional	rs11662318	18	26869056	AQP4	t	c	338	-0.34	-+	0.7338	0.916287
	Grey_Matter_Volume	Cross-Sectional	rs151246	18	26869139	AQP4	t	g	338	-0.933	+-	0.3506	0.88643
	Grey_Matter_Volume	Cross-Sectional	rs491148	18	26869803	AQP4	a	g	338	0.055	++	0.9561	0.992003
	Grey_Matter_Volume	Cross-Sectional	rs162002	18	26871015	AQP4	a	g	338	-0.559	+-	0.5763	0.88643
	Grey_Matter_Volume	Cross-Sectional	rs162001	18	26871481	AQP4	a	c	338	-2.393	--	0.01672	0.320069
	Grey_Matter_Volume	Cross-Sectional	rs3865411	18	26871684	AQP4	a	g	338	0.585	+-	0.5586	0.88643
	Grey_Matter_Volume	Cross-Sectional	rs162000	18	26872471	AQP4	a	c	338	0.116	-+	0.908	0.976699
	Grey_Matter_Volume	Cross-Sectional	rs12969503	18	26873564	AQP4	t	g	338	-0.817	--	0.4137	0.88643
	Grey_Matter_Volume	Cross-Sectional	rs8094228	18	26873767	AQP4	t	c	338	-0.476	+-	0.6341	0.88643
	Grey_Matter_Volume	Cross-Sectional	rs480647	18	26874290	AQP4	t	c	338	-1.452	--	0.1465	0.88643
	Grey_Matter_Volume	Cross-Sectional	rs10502478	18	26874616	AQP4	a	c	338	-2.318	--	0.02044	0.34237
	Grey_Matter_Volume	Cross-Sectional	rs7234562	18	34483685	DTNA	t	c	338	1.566	++	0.1174	0.827979
	Grey_Matter_Volume	Cross-Sectional	rs79922046	18	34485536	DTNA	a	g	338	0.448	+-	0.6541	0.88643
	Grey_Matter_Volume	Cross-Sectional	rs9955950	18	34485672	DTNA	t	c	338	-0.497	+-	0.6192	0.88643
	Grey_Matter_Volume	Cross-Sectional	rs12957028	18	34485948	DTNA	a	g	338	-1.187	--	0.2351	0.88643
	Grey_Matter_Volume	Cross-Sectional	rs72639491	18	34491438	DTNA	a	g	338	1.817	++	0.06926	0.707126
	Grey_Matter_Volume	Cross-Sectional	rs62097347	18	34492032	DTNA	c	g	338	-0.987	--	0.3238	0.88643
	Grey_Matter_Volume	Cross-Sectional	rs9961251	18	34492344	DTNA	t	c	338	0.538	-+	0.5908	0.88643
	Grey_Matter_Volume	Cross-Sectional	rs111846993	18	34494001	DTNA	t	c	338	-0.324	+-	0.7463	0.91747
	Grey_Matter_Volume	Cross-Sectional	rs4799769	18	34494577	DTNA	c	g	338	0.564	-+	0.5725	0.88643
	Grey_Matter_Volume	Cross-Sectional	rs8092794	18	34496273	DTNA	a	g	338	0.447	+-	0.6549	0.88643
	Grey_Matter_Volume	Cross-Sectional	rs7243528	18	34497055	DTNA	t	c	245	-1.078	?-	0.2809	0.88643
	Grey_Matter_Volume	Cross-Sectional	rs79972565	18	34497194	DTNA	t	g	245	-0.774	?-	0.4387	0.88643
	Grey_Matter_Volume	Cross-Sectional	rs35839923	18	34497764	DTNA	a	g	338	-1.229	+-	0.2189	0.88643
	Grey_Matter_Volume	Cross-Sectional	rs62097349	18	34499519	DTNA	a	g	338	-0.716	+-	0.4743	0.88643
	Grey_Matter_Volume	Cross-Sectional	rs9965622	18	34502153	DTNA	t	c	338	0.611	+-	0.5413	0.88643
	Grey_Matter_Volume	Cross-Sectional	rs62098462	18	34504364	DTNA	t	c	245	-0.546	?-	0.5849	0.88643
	Grey_Matter_Volume	Cross-Sectional	rs75127284	18	34506592	DTNA	a	c	245	1.269	?+	0.2046	0.88643
	Grey_Matter_Volume	Cross-Sectional	rs2439861	18	34507940	DTNA	a	g	245	-1.171	?-	0.2417	0.88643
	Grey_Matter_Volume	Cross-Sectional	rs2509597	18	34528430	DTNA	a	t	338	-0.861	--	0.389	0.88643
	Grey_Matter_Volume	Cross-Sectional	rs71363449	18	34531997	DTNA	t	c	245	-0.857	?-	0.3913	0.88643
	Grey_Matter_Volume	Cross-Sectional	rs2439853	18	34533937	DTNA	a	g	338	0.466	++	0.6414	0.88643
	Grey_Matter_Volume	Cross-Sectional	rs2439000	18	34536414	DTNA	c	g	245	-1.078	?-	0.2809	0.88643
	Grey_Matter_Volume	Cross-Sectional	rs1967583	18	34544573	DTNA	t	c	338	2.933	++	0.003353	0.0937553
	Grey_Matter_Volume	Cross-Sectional	rs28856895	18	34555507	DTNA	a	g	338	-0.257	+-	0.7975	0.937412
	Grey_Matter_Volume	Cross-Sectional	rs77973497	18	34560529	DTNA	a	c	245	0.516	?+	0.6058	0.88643
	Grey_Matter_Volume	Cross-Sectional	rs2579796	18	34569243	DTNA	a	g	338	0.151	+-	0.8798	0.970511
	Grey_Matter_Volume	Cross-Sectional	rs2579797	18	34571732	DTNA	t	g	245	0.688	?+	0.4912	0.88643
	Grey_Matter_Volume	Cross-Sectional	rs2685557	18	34576782	DTNA	t	c	338	0.151	+-	0.8798	0.970511
	Grey_Matter_Volume	Cross-Sectional	rs9958492	18	34577783	DTNA	t	c	245	-0.857	?-	0.3913	0.88643
	Grey_Matter_Volume	Cross-Sectional	rs2579802	18	34579787	DTNA	a	c	245	0.453	?+	0.6503	0.88643
	Grey_Matter_Volume	Cross-Sectional	rs74920018	18	34607557	DTNA	a	t	245	0.516	?+	0.6058	0.88643
	Grey_Matter_Volume	Cross-Sectional	rs1439127	18	34607759	DTNA	a	t	338	-1.37	--	0.1707	0.88643
	Grey_Matter_Volume	Cross-Sectional	rs12327368	18	34611361	DTNA	a	g	245	-0.857	?-	0.3913	0.88643
	Grey_Matter_Volume	Cross-Sectional	rs62097188	18	34611412	DTNA	a	g	245	0.019	?+	0.9846	0.992003
	Grey_Matter_Volume	Cross-Sectional	rs9807153	18	34635520	DTNA	a	t	338	0.823	++	0.4102	0.88643
	Grey_Matter_Volume	Cross-Sectional	rs2730126	18	34635939	DTNA	a	c	338	-0.474	--	0.6357	0.88643
	Grey_Matter_Volume	Cross-Sectional	rs1659526	18	34644451	DTNA	a	g	245	0.619	?+	0.5362	0.88643
	Grey_Matter_Volume	Cross-Sectional	rs17642885	18	34649976	DTNA	t	c	338	0.856	-+	0.3918	0.88643
	Grey_Matter_Volume	Cross-Sectional	rs1240974	18	34650949	DTNA	t	c	245	0.774	?+	0.4387	0.88643
	Grey_Matter_Volume	Cross-Sectional	rs55869511	18	34651262	DTNA	a	c	245	0.457	?+	0.6478	0.88643
	Grey_Matter_Volume	Cross-Sectional	rs12955208	18	34656737	DTNA	a	g	338	-2.863	--	0.004198	0.0937553
	Grey_Matter_Volume	Cross-Sectional	rs72953203	18	34660068	DTNA	a	g	338	1.195	++	0.2322	0.88643
	Grey_Matter_Volume	Cross-Sectional	rs9946070	18	34665505	DTNA	a	g	338	-0.778	+-	0.4367	0.88643
	Grey_Matter_Volume	Cross-Sectional	rs72953211	18	34673381	DTNA	a	c	338	-1.142	--	0.2534	0.88643
	Grey_Matter_Volume	Cross-Sectional	rs55971592	18	34697328	DTNA	a	g	338	0	+-	1	1
	Grey_Matter_Volume	Cross-Sectional	rs78837792	18	34703359	DTNA	t	c	338	-1.747	--	0.08059	0.707126
	Grey_Matter_Volume	Cross-Sectional	rs11663468	18	34707936	DTNA	t	c	338	0.799	++	0.4245	0.88643
	Grey_Matter_Volume	Cross-Sectional	rs12963825	18	34709484	DTNA	a	g	338	-2.893	--	0.003811	0.0937553
	Grey_Matter_Volume	Cross-Sectional	rs1480432	18	34727166	DTNA	t	g	338	-1.243	--	0.2138	0.88643
	Grey_Matter_Volume	Cross-Sectional	rs45556134	18	34729425	DTNA	a	g	245	-0.13	?-	0.8968	0.976699
	Grey_Matter_Volume	Cross-Sectional	rs17556884	18	34736455	DTNA	t	c	338	2.179	++	0.02934	0.393156
	Grey_Matter_Volume	Cross-Sectional	rs1480428	18	34738732	DTNA	a	g	338	1.193	++	0.2329	0.88643
	Grey_Matter_Volume	Cross-Sectional	rs12957349	18	34739291	DTNA	t	c	338	-2.863	--	0.004198	0.0937553
	Grey_Matter_Volume	Cross-Sectional	rs12608110	18	34752198	DTNA	a	g	338	0.177	++	0.8596	0.967953
	Grey_Matter_Volume	Cross-Sectional	rs7228547	18	34760039	DTNA	a	g	338	-1.319	--	0.187	0.88643
	Grey_Matter_Volume	Cross-Sectional	rs8099437	18	34761448	DTNA	t	g	338	0.919	++	0.3582	0.88643
	Grey_Matter_Volume	Cross-Sectional	rs72955132	18	34762382	DTNA	a	g	338	2.179	++	0.02934	0.393156
	Grey_Matter_Volume	Cross-Sectional	rs1817452	18	34776629	DTNA	t	c	338	-3.242	--	0.001188	0.0937553
	Grey_Matter_Volume	Cross-Sectional	rs56404226	18	34778060	DTNA	a	g	338	0.183	-+	0.855	0.967953
	Grey_Matter_Volume	Cross-Sectional	rs72955175	18	34779045	DTNA	a	t	338	-0.559	--	0.5761	0.88643
	Grey_Matter_Volume	Cross-Sectional	rs12608251	18	34782906	DTNA	t	g	338	-0.357	-+	0.7209	0.916287
	Grey_Matter_Volume	Cross-Sectional	rs76880720	18	34791141	DTNA	a	c	338	3.109	++	0.001875	0.0937553
	Grey_Matter_Volume	Cross-Sectional	rs9989533	18	34793909	DTNA	t	c	338	-0.455	--	0.6491	0.88643
	Grey_Matter_Volume	Cross-Sectional	rs79500711	18	34794379	DTNA	a	g	338	0.647	-+	0.5179	0.88643
	Grey_Matter_Volume	Cross-Sectional	rs138856611	18	34801684	DTNA	t	g	245	0.334	?+	0.7385	0.916287
	Grey_Matter_Volume	Cross-Sectional	rs62097226	18	34804223	DTNA	a	t	93	-0.031	-?	0.975	0.992003
	Grey_Matter_Volume	Cross-Sectional	rs4458079	18	34806161	DTNA	t	c	245	0.84	?+	0.4011	0.88643
	Grey_Matter_Volume	Cross-Sectional	rs8086358	18	34813672	DTNA	t	g	338	0.559	++	0.5761	0.88643
	Grey_Matter_Volume	Cross-Sectional	rs72963047	18	34818804	DTNA	a	c	338	-1.061	--	0.2885	0.88643
	Grey_Matter_Volume	Cross-Sectional	rs17557660	18	34831178	DTNA	a	t	93	-0.051	-?	0.9591	0.992003
	Grey_Matter_Volume	Cross-Sectional	rs1790533	18	34831631	DTNA	a	g	338	-0.038	-+	0.9698	0.992003
	Grey_Matter_Volume	Cross-Sectional	rs4799782	18	34841123	DTNA	a	g	245	-0.334	?-	0.7385	0.916287
	Grey_Matter_Volume	Cross-Sectional	rs1786604	18	34846264	DTNA	a	g	338	-0.559	--	0.5761	0.88643
	Grey_Matter_Volume	Cross-Sectional	rs7233779	18	34863262	DTNA	a	g	338	-1.054	--	0.2918	0.88643
	Grey_Matter_Volume	Cross-Sectional	rs644982	18	34869793	DTNA	a	g	338	0.84	++	0.4011	0.88643
	Grey_Matter_Volume	Cross-Sectional	rs11659517	18	34870978	DTNA	a	t	338	-1.878	--	0.06035	0.707126
	Grey_Matter_Volume	Cross-Sectional	rs524969	18	34872102	DTNA	a	t	338	-0.026	+-	0.9795	0.992003
	Grey_Matter_Volume	Cross-Sectional	rs637914	18	34876135	DTNA	a	t	338	-0.283	+-	0.7773	0.929984
	Grey_Matter_Volume	Cross-Sectional	rs9304141	18	34879143	DTNA	t	c	338	0.664	++	0.5068	0.88643
	Grey_Matter_Volume	Cross-Sectional	rs2288085	18	34879740	DTNA	a	g	338	-0.202	-+	0.8399	0.966632
	Grey_Matter_Volume	Cross-Sectional	rs17558116	18	34882719	DTNA	t	c	338	-1.441	--	0.1497	0.88643
	Grey_Matter_Volume	Cross-Sectional	rs10502637	18	34890006	DTNA	t	c	338	-0.979	--	0.3274	0.88643
	Grey_Matter_Volume	Cross-Sectional	rs149163416	18	34898841	DTNA	a	g	338	0.478	+-	0.6328	0.88643
	Grey_Matter_Volume	Cross-Sectional	20:33413780	20	33413780	SNTA1	a	t	338	0.908	-+	0.3641	0.88643
	Grey_Matter_Volume	Cross-Sectional	rs291683	20	33431611	SNTA1	t	c	338	-1.772	--	0.07641	0.707126
	Grey_Matter_Volume	Cross-Sectional	20:33433270	20	33433270	SNTA1	t	c	338	1.225	++	0.2208	0.88643
	Grey_Matter_Volume	Cross-Sectional	rs6141396	20	33436147	SNTA1	a	c	93	1.304	+?	0.1924	0.88643
	Grey_Matter_Volume	Cross-Sectional	rs293721	20	33441633	SNTA1	t	c	93	-1.723	-?	0.08483	0.707126
	Grey_Matter_Volume	Longitudinal	rs111599092	3	49465346	DAG1	a	g	111	-0.772	-+	0.44	0.800791
	Grey_Matter_Volume	Longitudinal	rs73073015	3	49465733	DAG1	a	g	47	1.39	+?	0.1646	0.800791
	Grey_Matter_Volume	Longitudinal	rs7611164	3	49471395	DAG1	t	g	64	0.789	?+	0.4304	0.800791
	Grey_Matter_Volume	Longitudinal	rs1568661	3	49483525	DAG1	a	g	111	1.168	++	0.2426	0.800791
	Grey_Matter_Volume	Longitudinal	rs7374731	3	49495661	DAG1	c	g	47	-0.695	-?	0.4869	0.800791
	Grey_Matter_Volume	Longitudinal	rs3870338	3	49519618	DAG1	a	g	111	1.168	++	0.2426	0.800791
	Grey_Matter_Volume	Longitudinal	rs55935606	3	49528072	DAG1	a	g	47	0.695	+?	0.4869	0.800791
	Grey_Matter_Volume	Longitudinal	rs75153130	3	49530436	DAG1	a	c	64	-0.789	?-	0.4304	0.800791
	Grey_Matter_Volume	Longitudinal	rs13079082	3	49537375	DAG1	c	g	111	-0.065	+-	0.9482	0.955847
	Grey_Matter_Volume	Longitudinal	rs4052546	3	49538116	DAG1	c	g	47	0.695	+?	0.4869	0.800791
	Grey_Matter_Volume	Longitudinal	rs73074830	3	49539584	DAG1	a	c	111	0.772	+-	0.44	0.800791
	Grey_Matter_Volume	Longitudinal	rs114093899	3	49539955	DAG1	c	g	64	-1.063	?-	0.2876	0.800791
	Grey_Matter_Volume	Longitudinal	rs9789109	18	26842291	AQP4	a	g	111	-1.267	--	0.2051	0.800791
	Grey_Matter_Volume	Longitudinal	rs10164026	18	26842362	AQP4	a	c	64	-1.26	?-	0.2078	0.800791
	Grey_Matter_Volume	Longitudinal	rs4800270	18	26844933	AQP4	t	g	111	0.467	+-	0.6408	0.840025
	Grey_Matter_Volume	Longitudinal	rs79668602	18	26845488	AQP4	a	g	64	-2.73	?-	0.006325	0.733
	Grey_Matter_Volume	Longitudinal	rs12458416	18	26847267	AQP4	c	g	64	-0.166	?-	0.868	0.946848
	Grey_Matter_Volume	Longitudinal	rs12953446	18	26848521	AQP4	a	g	111	-1.355	--	0.1756	0.800791
	Grey_Matter_Volume	Longitudinal	rs67461489	18	26848876	AQP4	t	c	111	2.221	++	0.02635	0.733
	Grey_Matter_Volume	Longitudinal	rs11661081	18	26850068	AQP4	a	c	64	0.105	?+	0.9161	0.953862
	Grey_Matter_Volume	Longitudinal	rs3763043	18	26855854	AQP4	t	c	111	-0.863	+-	0.3883	0.800791
	Grey_Matter_Volume	Longitudinal	rs68006382	18	26856555	AQP4	a	g	111	0.67	-+	0.5032	0.800791
	Grey_Matter_Volume	Longitudinal	rs335930	18	26856961	AQP4	a	c	111	0.478	+-	0.633	0.840025
	Grey_Matter_Volume	Longitudinal	rs162009	18	26864250	AQP4	a	g	111	-1.008	--	0.3136	0.800791
	Grey_Matter_Volume	Longitudinal	rs4800773	18	26865017	AQP4	a	g	111	0.289	++	0.7728	0.92
	Grey_Matter_Volume	Longitudinal	rs3875089	18	26865469	AQP4	t	c	111	1.954	++	0.05072	0.800791
	Grey_Matter_Volume	Longitudinal	rs72878787	18	26866517	AQP4	a	g	64	-0.105	?-	0.9161	0.953862
	Grey_Matter_Volume	Longitudinal	rs162006	18	26866570	AQP4	t	c	111	1.456	++	0.1454	0.800791
	Grey_Matter_Volume	Longitudinal	rs151244	18	26866755	AQP4	t	c	111	-0.801	+-	0.4232	0.800791
	Grey_Matter_Volume	Longitudinal	rs72878794	18	26866839	AQP4	t	c	111	-1.051	--	0.2934	0.800791
	Grey_Matter_Volume	Longitudinal	rs9961118	18	26866901	AQP4	t	c	47	0.529	+?	0.5967	0.840025
	Grey_Matter_Volume	Longitudinal	rs162004	18	26867972	AQP4	c	g	111	-1.142	--	0.2535	0.800791
	Grey_Matter_Volume	Longitudinal	rs72878799	18	26868165	AQP4	a	g	111	1.051	++	0.2934	0.800791
	Grey_Matter_Volume	Longitudinal	rs11662318	18	26869056	AQP4	t	c	111	-2.204	--	0.02754	0.733
	Grey_Matter_Volume	Longitudinal	rs151246	18	26869139	AQP4	t	g	111	0.37	-+	0.7116	0.863592
	Grey_Matter_Volume	Longitudinal	rs491148	18	26869803	AQP4	a	g	111	1.631	++	0.1029	0.800791
	Grey_Matter_Volume	Longitudinal	rs162002	18	26871015	AQP4	a	g	111	0.946	++	0.3439	0.800791
	Grey_Matter_Volume	Longitudinal	rs162001	18	26871481	AQP4	a	c	111	0.399	-+	0.6898	0.853713
	Grey_Matter_Volume	Longitudinal	rs3865411	18	26871684	AQP4	a	g	111	0.457	++	0.648	0.840025
	Grey_Matter_Volume	Longitudinal	rs162000	18	26872471	AQP4	a	c	111	0.999	++	0.3178	0.800791
	Grey_Matter_Volume	Longitudinal	rs12969503	18	26873564	AQP4	t	g	111	0.772	-+	0.4404	0.800791
	Grey_Matter_Volume	Longitudinal	rs8094228	18	26873767	AQP4	t	c	111	-1.114	--	0.2655	0.800791
	Grey_Matter_Volume	Longitudinal	rs480647	18	26874290	AQP4	t	c	111	1.968	++	0.04909	0.800791
	Grey_Matter_Volume	Longitudinal	rs10502478	18	26874616	AQP4	a	c	111	0.665	++	0.5061	0.800791
	Grey_Matter_Volume	Longitudinal	rs7234562	18	34483685	DTNA	t	c	111	0.319	-+	0.7496	0.900962
	Grey_Matter_Volume	Longitudinal	rs79922046	18	34485536	DTNA	a	g	64	0.717	?+	0.4731	0.800791
	Grey_Matter_Volume	Longitudinal	rs9955950	18	34485672	DTNA	t	c	111	1.774	++	0.07611	0.800791
	Grey_Matter_Volume	Longitudinal	rs12957028	18	34485948	DTNA	a	g	64	-0.717	?-	0.4731	0.800791
	Grey_Matter_Volume	Longitudinal	rs72639491	18	34491438	DTNA	a	g	111	0.616	++	0.5379	0.830093
	Grey_Matter_Volume	Longitudinal	rs62097347	18	34492032	DTNA	c	g	111	-2.184	--	0.02895	0.733
	Grey_Matter_Volume	Longitudinal	rs9961251	18	34492344	DTNA	t	c	111	0.054	+-	0.9567	0.9567
	Grey_Matter_Volume	Longitudinal	rs111846993	18	34494001	DTNA	t	c	64	0.408	?+	0.6833	0.853713
	Grey_Matter_Volume	Longitudinal	rs4799769	18	34494577	DTNA	c	g	111	-0.979	--	0.3276	0.800791
	Grey_Matter_Volume	Longitudinal	rs8092794	18	34496273	DTNA	a	g	111	1.26	++	0.2076	0.800791
	Grey_Matter_Volume	Longitudinal	rs7243528	18	34497055	DTNA	t	c	64	0.433	?+	0.6653	0.840025
	Grey_Matter_Volume	Longitudinal	rs79972565	18	34497194	DTNA	t	g	64	0.844	?+	0.3986	0.800791
	Grey_Matter_Volume	Longitudinal	rs35839923	18	34497764	DTNA	a	g	111	-0.544	-+	0.5867	0.840025
	Grey_Matter_Volume	Longitudinal	rs62097349	18	34499519	DTNA	a	g	111	-0.518	--	0.6042	0.840025
	Grey_Matter_Volume	Longitudinal	rs9965622	18	34502153	DTNA	t	c	64	-1.199	?-	0.2304	0.800791
	Grey_Matter_Volume	Longitudinal	rs75127284	18	34506592	DTNA	a	c	64	-0.485	?-	0.6275	0.840025
	Grey_Matter_Volume	Longitudinal	rs2439861	18	34507940	DTNA	a	g	64	0.485	?+	0.6275	0.840025
	Grey_Matter_Volume	Longitudinal	rs2509597	18	34528430	DTNA	a	t	111	0.541	++	0.5888	0.840025
	Grey_Matter_Volume	Longitudinal	rs71363449	18	34531997	DTNA	t	c	64	-1.291	?-	0.1967	0.800791
	Grey_Matter_Volume	Longitudinal	rs2439853	18	34533937	DTNA	a	g	64	-1.181	?-	0.2377	0.800791
	Grey_Matter_Volume	Longitudinal	rs2439000	18	34536414	DTNA	c	g	64	0.433	?+	0.6653	0.840025
	Grey_Matter_Volume	Longitudinal	rs1967583	18	34544573	DTNA	t	c	47	0.688	+?	0.4915	0.800791
	Grey_Matter_Volume	Longitudinal	rs28856895	18	34555507	DTNA	a	g	111	-1.346	--	0.1783	0.800791
	Grey_Matter_Volume	Longitudinal	rs2579796	18	34569243	DTNA	a	g	64	-1.579	?-	0.1144	0.800791
	Grey_Matter_Volume	Longitudinal	rs2579797	18	34571732	DTNA	t	g	64	-0.844	?-	0.3986	0.800791
	Grey_Matter_Volume	Longitudinal	rs2685557	18	34576782	DTNA	t	c	64	-1.579	?-	0.1144	0.800791
	Grey_Matter_Volume	Longitudinal	rs9958492	18	34577783	DTNA	t	c	64	-1.291	?-	0.1967	0.800791
	Grey_Matter_Volume	Longitudinal	rs2579802	18	34579787	DTNA	a	c	64	-0.844	?-	0.3986	0.800791
	Grey_Matter_Volume	Longitudinal	rs1439127	18	34607759	DTNA	a	t	64	-0.175	?-	0.8609	0.946848
	Grey_Matter_Volume	Longitudinal	rs12327368	18	34611361	DTNA	a	g	64	-1.291	?-	0.1967	0.800791
	Grey_Matter_Volume	Longitudinal	rs62097188	18	34611412	DTNA	a	g	64	0.08	?+	0.9363	0.953862
	Grey_Matter_Volume	Longitudinal	rs9807153	18	34635520	DTNA	a	t	111	0.905	++	0.3655	0.800791
	Grey_Matter_Volume	Longitudinal	rs2730126	18	34635939	DTNA	a	c	64	-1.579	?-	0.1144	0.800791
	Grey_Matter_Volume	Longitudinal	rs1659526	18	34644451	DTNA	a	g	64	-0.844	?-	0.3986	0.800791
	Grey_Matter_Volume	Longitudinal	rs17642885	18	34649976	DTNA	t	c	64	0.175	?+	0.8609	0.946848
	Grey_Matter_Volume	Longitudinal	rs1240974	18	34650949	DTNA	t	c	64	-0.844	?-	0.3986	0.800791
	Grey_Matter_Volume	Longitudinal	rs55869511	18	34651262	DTNA	a	c	64	1.291	?+	0.1967	0.800791
	Grey_Matter_Volume	Longitudinal	rs12955208	18	34656737	DTNA	a	g	64	0.233	?+	0.8161	0.927386
	Grey_Matter_Volume	Longitudinal	rs72953203	18	34660068	DTNA	a	g	111	-0.679	+-	0.4973	0.800791
	Grey_Matter_Volume	Longitudinal	rs9946070	18	34665505	DTNA	a	g	111	-1.477	--	0.1397	0.800791
	Grey_Matter_Volume	Longitudinal	rs72953211	18	34673381	DTNA	a	c	111	0.724	+-	0.4691	0.800791
	Grey_Matter_Volume	Longitudinal	rs55971592	18	34697328	DTNA	a	g	111	0.373	+-	0.7091	0.863592
	Grey_Matter_Volume	Longitudinal	rs78837792	18	34703359	DTNA	t	c	64	1.199	?+	0.2304	0.800791
	Grey_Matter_Volume	Longitudinal	rs11663468	18	34707936	DTNA	t	c	111	-0.724	-+	0.4691	0.800791
	Grey_Matter_Volume	Longitudinal	rs12963825	18	34709484	DTNA	a	g	111	-0.167	-+	0.8671	0.946848
	Grey_Matter_Volume	Longitudinal	rs1480432	18	34727166	DTNA	t	g	111	-1.034	--	0.3012	0.800791
	Grey_Matter_Volume	Longitudinal	rs45556134	18	34729425	DTNA	a	g	64	0.436	?+	0.6631	0.840025
	Grey_Matter_Volume	Longitudinal	rs17556884	18	34736455	DTNA	t	c	111	1.249	++	0.2116	0.800791
	Grey_Matter_Volume	Longitudinal	rs1480428	18	34738732	DTNA	a	g	111	1.399	++	0.1619	0.800791
	Grey_Matter_Volume	Longitudinal	rs12957349	18	34739291	DTNA	t	c	64	0.233	?+	0.8161	0.927386
	Grey_Matter_Volume	Longitudinal	rs12608110	18	34752198	DTNA	a	g	111	1.008	-+	0.3136	0.800791
	Grey_Matter_Volume	Longitudinal	rs7228547	18	34760039	DTNA	a	g	111	0.724	+-	0.4691	0.800791
	Grey_Matter_Volume	Longitudinal	rs8099437	18	34761448	DTNA	t	g	111	1.399	++	0.1619	0.800791
	Grey_Matter_Volume	Longitudinal	rs72955132	18	34762382	DTNA	a	g	111	1.249	++	0.2116	0.800791
	Grey_Matter_Volume	Longitudinal	rs1817452	18	34776629	DTNA	t	c	64	0.233	?+	0.8161	0.927386
	Grey_Matter_Volume	Longitudinal	rs56404226	18	34778060	DTNA	a	g	111	-0.753	--	0.4515	0.800791
	Grey_Matter_Volume	Longitudinal	rs72955175	18	34779045	DTNA	a	t	111	0.464	+-	0.6429	0.840025
	Grey_Matter_Volume	Longitudinal	rs12608251	18	34782906	DTNA	t	g	111	-0.102	-+	0.9186	0.953862
	Grey_Matter_Volume	Longitudinal	rs76880720	18	34791141	DTNA	a	c	64	-0.233	?-	0.8161	0.927386
	Grey_Matter_Volume	Longitudinal	rs9989533	18	34793909	DTNA	t	c	111	0.077	-+	0.9386	0.953862
	Grey_Matter_Volume	Longitudinal	rs79500711	18	34794379	DTNA	a	g	64	-1.199	?-	0.2304	0.800791
	Grey_Matter_Volume	Longitudinal	rs138856611	18	34801684	DTNA	t	g	64	0.08	?+	0.9363	0.953862
	Grey_Matter_Volume	Longitudinal	rs62097226	18	34804223	DTNA	a	t	47	-0.666	-?	0.5051	0.800791
	Grey_Matter_Volume	Longitudinal	rs4458079	18	34806161	DTNA	t	c	64	0.162	?+	0.8711	0.946848
	Grey_Matter_Volume	Longitudinal	rs8086358	18	34813672	DTNA	t	g	111	-0.464	-+	0.6429	0.840025
	Grey_Matter_Volume	Longitudinal	rs72963047	18	34818804	DTNA	a	c	111	0.497	-+	0.6191	0.840025
	Grey_Matter_Volume	Longitudinal	rs1790533	18	34831631	DTNA	a	g	111	-0.12	-+	0.9043	0.953862
	Grey_Matter_Volume	Longitudinal	rs4799782	18	34841123	DTNA	a	g	64	-0.08	?-	0.9363	0.953862
	Grey_Matter_Volume	Longitudinal	rs1786604	18	34846264	DTNA	a	g	111	0.464	+-	0.6429	0.840025
	Grey_Matter_Volume	Longitudinal	rs644982	18	34869793	DTNA	a	g	111	-0.724	-+	0.4691	0.800791
	Grey_Matter_Volume	Longitudinal	rs11659517	18	34870978	DTNA	a	t	64	0.731	?+	0.4648	0.800791
	Grey_Matter_Volume	Longitudinal	rs524969	18	34872102	DTNA	a	t	111	-0.241	+-	0.8099	0.927386
	Grey_Matter_Volume	Longitudinal	rs637914	18	34876135	DTNA	a	t	111	-0.526	+-	0.5987	0.840025
	Grey_Matter_Volume	Longitudinal	rs2288085	18	34879740	DTNA	a	g	111	-0.648	--	0.517	0.807813
	Grey_Matter_Volume	Longitudinal	rs17558116	18	34882719	DTNA	t	c	111	-1.133	--	0.2571	0.800791
	Grey_Matter_Volume	Longitudinal	rs10502637	18	34890006	DTNA	t	c	47	-0.529	-?	0.5967	0.840025
	Grey_Matter_Volume	Longitudinal	rs149163416	18	34898841	DTNA	a	g	111	1.458	++	0.1448	0.800791
	Grey_Matter_Volume	Longitudinal	20:33413780	20	33413780	SNTA1	a	t	111	-2.179	--	0.02932	0.733
	Grey_Matter_Volume	Longitudinal	rs291683	20	33431611	SNTA1	t	c	111	0.942	-+	0.3464	0.800791
	Grey_Matter_Volume	Longitudinal	20:33433270	20	33433270	SNTA1	t	c	111	-1.159	+-	0.2465	0.800791
	Grey_Matter_Volume	Longitudinal	rs6141396	20	33436147	SNTA1	a	c	47	1.756	+?	0.07913	0.800791
	Hippocampal_Volume	Cross-Sectional	rs111599092	3	49465346	DAG1	a	g	338	-0.526	+-	0.599	0.9822
	Hippocampal_Volume	Cross-Sectional	rs73073015	3	49465733	DAG1	a	g	338	-0.456	--	0.6484	0.9822
	Hippocampal_Volume	Cross-Sectional	rs7611164	3	49471395	DAG1	t	g	245	0.76	?+	0.447	0.9822
	Hippocampal_Volume	Cross-Sectional	rs1568661	3	49483525	DAG1	a	g	338	0.342	-+	0.7326	0.9822
	Hippocampal_Volume	Cross-Sectional	rs7374731	3	49495661	DAG1	c	g	338	0.879	++	0.3793	0.9822
	Hippocampal_Volume	Cross-Sectional	rs73074811	3	49516098	DAG1	a	t	338	-0.063	-+	0.9501	0.9822
	Hippocampal_Volume	Cross-Sectional	rs3870338	3	49519618	DAG1	a	g	338	0.342	-+	0.7326	0.9822
	Hippocampal_Volume	Cross-Sectional	rs55935606	3	49528072	DAG1	a	g	338	-1.37	--	0.1707	0.9822
	Hippocampal_Volume	Cross-Sectional	rs75153130	3	49530436	DAG1	a	c	245	-0.76	?-	0.447	0.9822
	Hippocampal_Volume	Cross-Sectional	rs13079082	3	49537375	DAG1	c	g	338	-0.022	+-	0.9822	0.9822
	Hippocampal_Volume	Cross-Sectional	rs4052546	3	49538116	DAG1	c	g	338	-0.879	--	0.3793	0.9822
	Hippocampal_Volume	Cross-Sectional	rs73074830	3	49539584	DAG1	a	c	338	-0.412	--	0.6804	0.9822
	Hippocampal_Volume	Cross-Sectional	rs114093899	3	49539955	DAG1	c	g	245	-0.292	?-	0.77	0.9822
	Hippocampal_Volume	Cross-Sectional	rs9789109	18	26842291	AQP4	a	g	338	0.906	++	0.3647	0.9822
	Hippocampal_Volume	Cross-Sectional	rs10164026	18	26842362	AQP4	a	c	338	-1.067	+-	0.2858	0.9822
	Hippocampal_Volume	Cross-Sectional	rs4800270	18	26844933	AQP4	t	g	338	-0.302	+-	0.763	0.9822
	Hippocampal_Volume	Cross-Sectional	rs79668602	18	26845488	AQP4	a	g	245	-0.32	?-	0.749	0.9822
	Hippocampal_Volume	Cross-Sectional	rs12458416	18	26847267	AQP4	c	g	245	-1.219	?-	0.223	0.9822
	Hippocampal_Volume	Cross-Sectional	rs12953446	18	26848521	AQP4	a	g	338	0.572	-+	0.5673	0.9822
	Hippocampal_Volume	Cross-Sectional	rs67461489	18	26848876	AQP4	t	c	338	0.04	+-	0.9683	0.9822
	Hippocampal_Volume	Cross-Sectional	rs11661081	18	26850068	AQP4	a	c	245	0.375	?+	0.7075	0.9822
	Hippocampal_Volume	Cross-Sectional	rs3763043	18	26855854	AQP4	t	c	338	-0.027	+-	0.9781	0.9822
	Hippocampal_Volume	Cross-Sectional	rs68006382	18	26856555	AQP4	a	g	338	-0.526	-+	0.5991	0.9822
	Hippocampal_Volume	Cross-Sectional	rs335930	18	26856961	AQP4	a	c	338	1.364	++	0.1726	0.9822
	Hippocampal_Volume	Cross-Sectional	rs71353405	18	26857429	AQP4	t	c	245	-0.165	?-	0.8691	0.9822
	Hippocampal_Volume	Cross-Sectional	rs162009	18	26864250	AQP4	a	g	338	-0.79	--	0.4294	0.9822
	Hippocampal_Volume	Cross-Sectional	rs4800773	18	26865017	AQP4	a	g	338	0.531	-+	0.5957	0.9822
	Hippocampal_Volume	Cross-Sectional	rs3875089	18	26865469	AQP4	t	c	338	-0.293	-+	0.7698	0.9822
	Hippocampal_Volume	Cross-Sectional	rs72878787	18	26866517	AQP4	a	g	245	-0.928	?-	0.3536	0.9822
	Hippocampal_Volume	Cross-Sectional	rs162006	18	26866570	AQP4	t	c	338	-0.555	--	0.579	0.9822
	Hippocampal_Volume	Cross-Sectional	rs151244	18	26866755	AQP4	t	c	338	-0.266	+-	0.7903	0.9822
	Hippocampal_Volume	Cross-Sectional	rs72878794	18	26866839	AQP4	t	c	338	-0.285	+-	0.7759	0.9822
	Hippocampal_Volume	Cross-Sectional	rs9961118	18	26866901	AQP4	t	c	93	1.471	+?	0.1412	0.9822
	Hippocampal_Volume	Cross-Sectional	rs162004	18	26867972	AQP4	c	g	338	-0.055	-+	0.9565	0.9822
	Hippocampal_Volume	Cross-Sectional	rs72878799	18	26868165	AQP4	a	g	338	-0.322	--	0.7478	0.9822
	Hippocampal_Volume	Cross-Sectional	rs11662318	18	26869056	AQP4	t	c	338	0.451	++	0.6519	0.9822
	Hippocampal_Volume	Cross-Sectional	rs151246	18	26869139	AQP4	t	g	338	-0.824	-+	0.4098	0.9822
	Hippocampal_Volume	Cross-Sectional	rs491148	18	26869803	AQP4	a	g	338	-0.837	--	0.4028	0.9822
	Hippocampal_Volume	Cross-Sectional	rs162002	18	26871015	AQP4	a	g	338	-0.304	--	0.7612	0.9822
	Hippocampal_Volume	Cross-Sectional	rs162001	18	26871481	AQP4	a	c	338	-1.007	--	0.3139	0.9822
	Hippocampal_Volume	Cross-Sectional	rs3865411	18	26871684	AQP4	a	g	338	0.484	+-	0.6283	0.9822
	Hippocampal_Volume	Cross-Sectional	rs162000	18	26872471	AQP4	a	c	338	-0.097	-+	0.9226	0.9822
	Hippocampal_Volume	Cross-Sectional	rs12969503	18	26873564	AQP4	t	g	338	-0.257	--	0.7974	0.9822
	Hippocampal_Volume	Cross-Sectional	rs8094228	18	26873767	AQP4	t	c	338	0.177	-+	0.8597	0.9822
	Hippocampal_Volume	Cross-Sectional	rs480647	18	26874290	AQP4	t	c	338	-0.691	--	0.4898	0.9822
	Hippocampal_Volume	Cross-Sectional	rs10502478	18	26874616	AQP4	a	c	338	-0.551	--	0.5814	0.9822
	Hippocampal_Volume	Cross-Sectional	rs7234562	18	34483685	DTNA	t	c	338	1.587	++	0.1124	0.9822
	Hippocampal_Volume	Cross-Sectional	rs79922046	18	34485536	DTNA	a	g	338	0.456	-+	0.6481	0.9822
	Hippocampal_Volume	Cross-Sectional	rs9955950	18	34485672	DTNA	t	c	338	0.671	++	0.502	0.9822
	Hippocampal_Volume	Cross-Sectional	rs12957028	18	34485948	DTNA	a	g	338	-0.931	+-	0.3517	0.9822
	Hippocampal_Volume	Cross-Sectional	rs72639491	18	34491438	DTNA	a	g	338	0.039	-+	0.9693	0.9822
	Hippocampal_Volume	Cross-Sectional	rs62097347	18	34492032	DTNA	c	g	338	-1.353	--	0.176	0.9822
	Hippocampal_Volume	Cross-Sectional	rs9961251	18	34492344	DTNA	t	c	338	-1.163	--	0.2448	0.9822
	Hippocampal_Volume	Cross-Sectional	rs111846993	18	34494001	DTNA	t	c	338	0.845	-+	0.3982	0.9822
	Hippocampal_Volume	Cross-Sectional	rs4799769	18	34494577	DTNA	c	g	338	-0.61	--	0.5422	0.9822
	Hippocampal_Volume	Cross-Sectional	rs8092794	18	34496273	DTNA	a	g	338	0.104	+-	0.9168	0.9822
	Hippocampal_Volume	Cross-Sectional	rs7243528	18	34497055	DTNA	t	c	245	1.43	?+	0.1526	0.9822
	Hippocampal_Volume	Cross-Sectional	rs79972565	18	34497194	DTNA	t	g	245	1.121	?+	0.2622	0.9822
	Hippocampal_Volume	Cross-Sectional	rs35839923	18	34497764	DTNA	a	g	338	-0.687	--	0.4918	0.9822
	Hippocampal_Volume	Cross-Sectional	rs62097349	18	34499519	DTNA	a	g	338	-0.161	-+	0.8717	0.9822
	Hippocampal_Volume	Cross-Sectional	rs9965622	18	34502153	DTNA	t	c	338	-0.762	+-	0.4458	0.9822
	Hippocampal_Volume	Cross-Sectional	rs62098462	18	34504364	DTNA	t	c	245	0.425	?+	0.6712	0.9822
	Hippocampal_Volume	Cross-Sectional	rs75127284	18	34506592	DTNA	a	c	245	-0.818	?-	0.4133	0.9822
	Hippocampal_Volume	Cross-Sectional	rs2439861	18	34507940	DTNA	a	g	245	1.054	?+	0.2917	0.9822
	Hippocampal_Volume	Cross-Sectional	rs2509597	18	34528430	DTNA	a	t	338	-0.091	+-	0.9277	0.9822
	Hippocampal_Volume	Cross-Sectional	rs71363449	18	34531997	DTNA	t	c	245	-0.413	?-	0.6793	0.9822
	Hippocampal_Volume	Cross-Sectional	rs2439853	18	34533937	DTNA	a	g	338	-0.744	+-	0.457	0.9822
	Hippocampal_Volume	Cross-Sectional	rs2439000	18	34536414	DTNA	c	g	245	1.43	?+	0.1526	0.9822
	Hippocampal_Volume	Cross-Sectional	rs1967583	18	34544573	DTNA	t	c	338	0.327	-+	0.744	0.9822
	Hippocampal_Volume	Cross-Sectional	rs28856895	18	34555507	DTNA	a	g	338	-0.565	--	0.5719	0.9822
	Hippocampal_Volume	Cross-Sectional	rs77973497	18	34560529	DTNA	a	c	245	-0.26	?-	0.7948	0.9822
	Hippocampal_Volume	Cross-Sectional	rs2579796	18	34569243	DTNA	a	g	338	-0.676	+-	0.4991	0.9822
	Hippocampal_Volume	Cross-Sectional	rs2579797	18	34571732	DTNA	t	g	245	-1.353	?-	0.1761	0.9822
	Hippocampal_Volume	Cross-Sectional	rs2685557	18	34576782	DTNA	t	c	338	-0.676	+-	0.4991	0.9822
	Hippocampal_Volume	Cross-Sectional	rs9958492	18	34577783	DTNA	t	c	245	-0.413	?-	0.6793	0.9822
	Hippocampal_Volume	Cross-Sectional	rs2579802	18	34579787	DTNA	a	c	245	-0.95	?-	0.3422	0.9822
	Hippocampal_Volume	Cross-Sectional	rs74920018	18	34607557	DTNA	a	t	245	-0.26	?-	0.7948	0.9822
	Hippocampal_Volume	Cross-Sectional	rs1439127	18	34607759	DTNA	a	t	338	1.162	-+	0.2453	0.9822
	Hippocampal_Volume	Cross-Sectional	rs12327368	18	34611361	DTNA	a	g	245	-0.413	?-	0.6793	0.9822
	Hippocampal_Volume	Cross-Sectional	rs62097188	18	34611412	DTNA	a	g	245	-0.031	?-	0.9754	0.9822
	Hippocampal_Volume	Cross-Sectional	rs9807153	18	34635520	DTNA	a	t	338	1.324	++	0.1856	0.9822
	Hippocampal_Volume	Cross-Sectional	rs2730126	18	34635939	DTNA	a	c	338	-0.696	+-	0.4864	0.9822
	Hippocampal_Volume	Cross-Sectional	rs1659526	18	34644451	DTNA	a	g	245	-0.838	?-	0.4022	0.9822
	Hippocampal_Volume	Cross-Sectional	rs17642885	18	34649976	DTNA	t	c	338	-0.956	+-	0.339	0.9822
	Hippocampal_Volume	Cross-Sectional	rs1240974	18	34650949	DTNA	t	c	245	-1.121	?-	0.2622	0.9822
	Hippocampal_Volume	Cross-Sectional	rs55869511	18	34651262	DTNA	a	c	245	-0.157	?-	0.8752	0.9822
	Hippocampal_Volume	Cross-Sectional	rs12955208	18	34656737	DTNA	a	g	338	-1.527	--	0.1267	0.9822
	Hippocampal_Volume	Cross-Sectional	rs72953203	18	34660068	DTNA	a	g	338	-0.914	+-	0.3606	0.9822
	Hippocampal_Volume	Cross-Sectional	rs9946070	18	34665505	DTNA	a	g	338	0.647	-+	0.5178	0.9822
	Hippocampal_Volume	Cross-Sectional	rs72953211	18	34673381	DTNA	a	c	338	0.065	-+	0.9481	0.9822
	Hippocampal_Volume	Cross-Sectional	rs55971592	18	34697328	DTNA	a	g	338	0.418	++	0.6756	0.9822
	Hippocampal_Volume	Cross-Sectional	rs78837792	18	34703359	DTNA	t	c	338	1.075	-+	0.2824	0.9822
	Hippocampal_Volume	Cross-Sectional	rs11663468	18	34707936	DTNA	t	c	338	0.1	-+	0.92	0.9822
	Hippocampal_Volume	Cross-Sectional	rs12963825	18	34709484	DTNA	a	g	338	-0.37	-+	0.7115	0.9822
	Hippocampal_Volume	Cross-Sectional	rs1480432	18	34727166	DTNA	t	g	338	-0.082	-+	0.9348	0.9822
	Hippocampal_Volume	Cross-Sectional	rs45556134	18	34729425	DTNA	a	g	245	0.682	?+	0.495	0.9822
	Hippocampal_Volume	Cross-Sectional	rs17556884	18	34736455	DTNA	t	c	338	0.16	+-	0.873	0.9822
	Hippocampal_Volume	Cross-Sectional	rs1480428	18	34738732	DTNA	a	g	338	-0.307	+-	0.7592	0.9822
	Hippocampal_Volume	Cross-Sectional	rs12957349	18	34739291	DTNA	t	c	338	-1.527	--	0.1267	0.9822
	Hippocampal_Volume	Cross-Sectional	rs12608110	18	34752198	DTNA	a	g	338	-0.333	+-	0.7389	0.9822
	Hippocampal_Volume	Cross-Sectional	rs7228547	18	34760039	DTNA	a	g	338	0.25	+-	0.8024	0.9822
	Hippocampal_Volume	Cross-Sectional	rs8099437	18	34761448	DTNA	t	g	338	-0.476	+-	0.6337	0.9822
	Hippocampal_Volume	Cross-Sectional	rs72955132	18	34762382	DTNA	a	g	338	0.16	+-	0.873	0.9822
	Hippocampal_Volume	Cross-Sectional	rs1817452	18	34776629	DTNA	t	c	338	-2.028	--	0.04258	0.9822
	Hippocampal_Volume	Cross-Sectional	rs56404226	18	34778060	DTNA	a	g	338	-0.073	-+	0.9419	0.9822
	Hippocampal_Volume	Cross-Sectional	rs72955175	18	34779045	DTNA	a	t	338	0.54	++	0.5889	0.9822
	Hippocampal_Volume	Cross-Sectional	rs12608251	18	34782906	DTNA	t	g	338	-0.678	-+	0.498	0.9822
	Hippocampal_Volume	Cross-Sectional	rs76880720	18	34791141	DTNA	a	c	338	0.916	+-	0.3596	0.9822
	Hippocampal_Volume	Cross-Sectional	rs9989533	18	34793909	DTNA	t	c	338	0.554	+-	0.5799	0.9822
	Hippocampal_Volume	Cross-Sectional	rs79500711	18	34794379	DTNA	a	g	338	-1.545	+-	0.1223	0.9822
	Hippocampal_Volume	Cross-Sectional	rs138856611	18	34801684	DTNA	t	g	245	-0.486	?-	0.6267	0.9822
	Hippocampal_Volume	Cross-Sectional	rs62097226	18	34804223	DTNA	a	t	93	-0.748	-?	0.4546	0.9822
	Hippocampal_Volume	Cross-Sectional	rs4458079	18	34806161	DTNA	t	c	245	-0.23	?-	0.8182	0.9822
	Hippocampal_Volume	Cross-Sectional	rs8086358	18	34813672	DTNA	t	g	338	-0.54	--	0.5889	0.9822
	Hippocampal_Volume	Cross-Sectional	rs72963047	18	34818804	DTNA	a	c	338	-0.267	-+	0.7898	0.9822
	Hippocampal_Volume	Cross-Sectional	rs17557660	18	34831178	DTNA	a	t	93	-0.982	-?	0.3263	0.9822
	Hippocampal_Volume	Cross-Sectional	rs1790533	18	34831631	DTNA	a	g	338	0.073	-+	0.942	0.9822
	Hippocampal_Volume	Cross-Sectional	rs4799782	18	34841123	DTNA	a	g	245	0.486	?+	0.6267	0.9822
	Hippocampal_Volume	Cross-Sectional	rs1786604	18	34846264	DTNA	a	g	338	0.54	++	0.5889	0.9822
	Hippocampal_Volume	Cross-Sectional	rs7233779	18	34863262	DTNA	a	g	338	0.547	-+	0.5846	0.9822
	Hippocampal_Volume	Cross-Sectional	rs644982	18	34869793	DTNA	a	g	338	0.464	+-	0.6425	0.9822
	Hippocampal_Volume	Cross-Sectional	rs11659517	18	34870978	DTNA	a	t	338	-1.06	--	0.2893	0.9822
	Hippocampal_Volume	Cross-Sectional	rs524969	18	34872102	DTNA	a	t	338	0.127	+-	0.8991	0.9822
	Hippocampal_Volume	Cross-Sectional	rs637914	18	34876135	DTNA	a	t	338	-0.244	+-	0.8071	0.9822
	Hippocampal_Volume	Cross-Sectional	rs9304141	18	34879143	DTNA	t	c	338	0.853	++	0.3936	0.9822
	Hippocampal_Volume	Cross-Sectional	rs2288085	18	34879740	DTNA	a	g	338	-0.57	--	0.5685	0.9822
	Hippocampal_Volume	Cross-Sectional	rs17558116	18	34882719	DTNA	t	c	338	1.445	-+	0.1484	0.9822
	Hippocampal_Volume	Cross-Sectional	rs10502637	18	34890006	DTNA	t	c	338	-1.772	--	0.07641	0.9822
	Hippocampal_Volume	Cross-Sectional	rs149163416	18	34898841	DTNA	a	g	338	0.137	+-	0.8913	0.9822
	Hippocampal_Volume	Cross-Sectional	20:33413780	20	33413780	SNTA1	a	t	338	-0.448	--	0.6538	0.9822
	Hippocampal_Volume	Cross-Sectional	rs291683	20	33431611	SNTA1	t	c	338	-2.188	--	0.02868	0.9822
	Hippocampal_Volume	Cross-Sectional	20:33433270	20	33433270	SNTA1	t	c	338	1.97	++	0.04884	0.9822
	Hippocampal_Volume	Cross-Sectional	rs6141396	20	33436147	SNTA1	a	c	93	0.598	+?	0.5498	0.9822
	Hippocampal_Volume	Cross-Sectional	rs293721	20	33441633	SNTA1	t	c	93	-0.878	-?	0.3799	0.9822
	Hippocampal_Volume	Longitudinal	rs111599092	3	49465346	DAG1	a	g	111	-0.108	-+	0.9137	0.943905
	Hippocampal_Volume	Longitudinal	rs73073015	3	49465733	DAG1	a	g	47	0.271	+?	0.7867	0.943905
	Hippocampal_Volume	Longitudinal	rs7611164	3	49471395	DAG1	t	g	64	-0.008	?-	0.9936	0.9936
	Hippocampal_Volume	Longitudinal	rs1568661	3	49483525	DAG1	a	g	111	0.92	-+	0.3574	0.743182
	Hippocampal_Volume	Longitudinal	rs7374731	3	49495661	DAG1	c	g	47	-1.45	-?	0.147	0.592742
	Hippocampal_Volume	Longitudinal	rs3870338	3	49519618	DAG1	a	g	111	0.92	-+	0.3574	0.743182
	Hippocampal_Volume	Longitudinal	rs55935606	3	49528072	DAG1	a	g	47	1.45	+?	0.147	0.592742
	Hippocampal_Volume	Longitudinal	rs75153130	3	49530436	DAG1	a	c	64	0.008	?+	0.9936	0.9936
	Hippocampal_Volume	Longitudinal	rs13079082	3	49537375	DAG1	c	g	111	-1.011	--	0.3122	0.743182
	Hippocampal_Volume	Longitudinal	rs4052546	3	49538116	DAG1	c	g	47	1.45	+?	0.147	0.592742
	Hippocampal_Volume	Longitudinal	rs73074830	3	49539584	DAG1	a	c	111	0.108	+-	0.9137	0.943905
	Hippocampal_Volume	Longitudinal	rs114093899	3	49539955	DAG1	c	g	64	-1.736	?-	0.08265	0.592742
	Hippocampal_Volume	Longitudinal	rs9789109	18	26842291	AQP4	a	g	111	-0.696	--	0.4866	0.789307
	Hippocampal_Volume	Longitudinal	rs10164026	18	26842362	AQP4	a	c	64	-0.672	?-	0.5015	0.789307
	Hippocampal_Volume	Longitudinal	rs4800270	18	26844933	AQP4	t	g	111	-0.262	+-	0.7929	0.943905
	Hippocampal_Volume	Longitudinal	rs79668602	18	26845488	AQP4	a	g	64	-1.359	?-	0.1742	0.640441
	Hippocampal_Volume	Longitudinal	rs12458416	18	26847267	AQP4	c	g	64	-0.273	?-	0.7847	0.943905
	Hippocampal_Volume	Longitudinal	rs12953446	18	26848521	AQP4	a	g	111	0.692	++	0.4888	0.789307
	Hippocampal_Volume	Longitudinal	rs67461489	18	26848876	AQP4	t	c	111	0.68	++	0.4962	0.789307
	Hippocampal_Volume	Longitudinal	rs11661081	18	26850068	AQP4	a	c	64	1	?+	0.3173	0.743182
	Hippocampal_Volume	Longitudinal	rs3763043	18	26855854	AQP4	t	c	111	-0.762	--	0.4463	0.789307
	Hippocampal_Volume	Longitudinal	rs68006382	18	26856555	AQP4	a	g	111	1.249	++	0.2116	0.714865
	Hippocampal_Volume	Longitudinal	rs335930	18	26856961	AQP4	a	c	111	-0.86	--	0.3897	0.743182
	Hippocampal_Volume	Longitudinal	rs162009	18	26864250	AQP4	a	g	111	0.534	-+	0.5936	0.852874
	Hippocampal_Volume	Longitudinal	rs4800773	18	26865017	AQP4	a	g	111	-0.732	--	0.4643	0.789307
	Hippocampal_Volume	Longitudinal	rs3875089	18	26865469	AQP4	t	c	111	0.69	++	0.49	0.789307
	Hippocampal_Volume	Longitudinal	rs72878787	18	26866517	AQP4	a	g	64	-1	?-	0.3173	0.743182
	Hippocampal_Volume	Longitudinal	rs162006	18	26866570	AQP4	t	c	111	0.355	-+	0.7223	0.943905
	Hippocampal_Volume	Longitudinal	rs151244	18	26866755	AQP4	t	c	111	-0.232	+-	0.8162	0.943905
	Hippocampal_Volume	Longitudinal	rs72878794	18	26866839	AQP4	t	c	111	0.638	-+	0.5238	0.789307
	Hippocampal_Volume	Longitudinal	rs9961118	18	26866901	AQP4	t	c	47	-0.142	-?	0.8871	0.943905
	Hippocampal_Volume	Longitudinal	rs162004	18	26867972	AQP4	c	g	111	0.893	++	0.3717	0.743182
	Hippocampal_Volume	Longitudinal	rs72878799	18	26868165	AQP4	a	g	111	-0.638	+-	0.5238	0.789307
	Hippocampal_Volume	Longitudinal	rs11662318	18	26869056	AQP4	t	c	111	-0.882	--	0.3779	0.743182
	Hippocampal_Volume	Longitudinal	rs151246	18	26869139	AQP4	t	g	111	1.43	++	0.1528	0.596875
	Hippocampal_Volume	Longitudinal	rs491148	18	26869803	AQP4	a	g	111	1.102	++	0.2703	0.743182
	Hippocampal_Volume	Longitudinal	rs162002	18	26871015	AQP4	a	g	111	0.207	+-	0.8362	0.943905
	Hippocampal_Volume	Longitudinal	rs162001	18	26871481	AQP4	a	c	111	0.65	+-	0.5158	0.789307
	Hippocampal_Volume	Longitudinal	rs3865411	18	26871684	AQP4	a	g	111	0.317	++	0.7513	0.943905
	Hippocampal_Volume	Longitudinal	rs162000	18	26872471	AQP4	a	c	111	0.093	+-	0.9262	0.948975
	Hippocampal_Volume	Longitudinal	rs12969503	18	26873564	AQP4	t	g	111	-0.664	--	0.507	0.789307
	Hippocampal_Volume	Longitudinal	rs8094228	18	26873767	AQP4	t	c	111	0.825	++	0.4095	0.758456
	Hippocampal_Volume	Longitudinal	rs480647	18	26874290	AQP4	t	c	111	1.822	++	0.06838	0.592742
	Hippocampal_Volume	Longitudinal	rs10502478	18	26874616	AQP4	a	c	111	0.855	+-	0.3924	0.743182
	Hippocampal_Volume	Longitudinal	rs7234562	18	34483685	DTNA	t	c	111	-0.237	-+	0.8129	0.943905
	Hippocampal_Volume	Longitudinal	rs79922046	18	34485536	DTNA	a	g	64	0.553	?+	0.58	0.843023
	Hippocampal_Volume	Longitudinal	rs9955950	18	34485672	DTNA	t	c	111	-0.333	-+	0.7394	0.943905
	Hippocampal_Volume	Longitudinal	rs12957028	18	34485948	DTNA	a	g	64	-0.553	?-	0.58	0.843023
	Hippocampal_Volume	Longitudinal	rs72639491	18	34491438	DTNA	a	g	111	-0.192	-+	0.8476	0.943905
	Hippocampal_Volume	Longitudinal	rs62097347	18	34492032	DTNA	c	g	111	0.207	+-	0.836	0.943905
	Hippocampal_Volume	Longitudinal	rs9961251	18	34492344	DTNA	t	c	111	-0.267	+-	0.7891	0.943905
	Hippocampal_Volume	Longitudinal	rs111846993	18	34494001	DTNA	t	c	64	-0.024	?-	0.9807	0.9936
	Hippocampal_Volume	Longitudinal	rs4799769	18	34494577	DTNA	c	g	111	-0.197	+-	0.8435	0.943905
	Hippocampal_Volume	Longitudinal	rs8092794	18	34496273	DTNA	a	g	111	1.639	++	0.1012	0.592742
	Hippocampal_Volume	Longitudinal	rs7243528	18	34497055	DTNA	t	c	64	-0.113	?-	0.9098	0.943905
	Hippocampal_Volume	Longitudinal	rs79972565	18	34497194	DTNA	t	g	64	0.859	?+	0.3906	0.743182
	Hippocampal_Volume	Longitudinal	rs35839923	18	34497764	DTNA	a	g	111	1.179	++	0.2384	0.743182
	Hippocampal_Volume	Longitudinal	rs62097349	18	34499519	DTNA	a	g	111	0.17	+-	0.8648	0.943905
	Hippocampal_Volume	Longitudinal	rs9965622	18	34502153	DTNA	t	c	64	-0.437	?-	0.6623	0.919861
	Hippocampal_Volume	Longitudinal	rs75127284	18	34506592	DTNA	a	c	64	-0.144	?-	0.8853	0.943905
	Hippocampal_Volume	Longitudinal	rs2439861	18	34507940	DTNA	a	g	64	0.144	?+	0.8853	0.943905
	Hippocampal_Volume	Longitudinal	rs2509597	18	34528430	DTNA	a	t	111	0.614	++	0.5394	0.802679
	Hippocampal_Volume	Longitudinal	rs71363449	18	34531997	DTNA	t	c	64	-1.595	?-	0.1108	0.592742
	Hippocampal_Volume	Longitudinal	rs2439853	18	34533937	DTNA	a	g	64	-0.946	?-	0.344	0.743182
	Hippocampal_Volume	Longitudinal	rs2439000	18	34536414	DTNA	c	g	64	-0.113	?-	0.9098	0.943905
	Hippocampal_Volume	Longitudinal	rs1967583	18	34544573	DTNA	t	c	47	0.173	+?	0.8628	0.943905
	Hippocampal_Volume	Longitudinal	rs28856895	18	34555507	DTNA	a	g	111	-0.7	--	0.4837	0.789307
	Hippocampal_Volume	Longitudinal	rs2579796	18	34569243	DTNA	a	g	64	-1.802	?-	0.07152	0.592742
	Hippocampal_Volume	Longitudinal	rs2579797	18	34571732	DTNA	t	g	64	-0.859	?-	0.3906	0.743182
	Hippocampal_Volume	Longitudinal	rs2685557	18	34576782	DTNA	t	c	64	-1.802	?-	0.07152	0.592742
	Hippocampal_Volume	Longitudinal	rs9958492	18	34577783	DTNA	t	c	64	-1.595	?-	0.1108	0.592742
	Hippocampal_Volume	Longitudinal	rs2579802	18	34579787	DTNA	a	c	64	-0.859	?-	0.3906	0.743182
	Hippocampal_Volume	Longitudinal	rs1439127	18	34607759	DTNA	a	t	64	-0.983	?-	0.3255	0.743182
	Hippocampal_Volume	Longitudinal	rs12327368	18	34611361	DTNA	a	g	64	-1.595	?-	0.1108	0.592742
	Hippocampal_Volume	Longitudinal	rs62097188	18	34611412	DTNA	a	g	64	0.318	?+	0.7507	0.943905
	Hippocampal_Volume	Longitudinal	rs9807153	18	34635520	DTNA	a	t	111	-0.819	--	0.4126	0.758456
	Hippocampal_Volume	Longitudinal	rs2730126	18	34635939	DTNA	a	c	64	-1.802	?-	0.07152	0.592742
	Hippocampal_Volume	Longitudinal	rs1659526	18	34644451	DTNA	a	g	64	-0.859	?-	0.3906	0.743182
	Hippocampal_Volume	Longitudinal	rs17642885	18	34649976	DTNA	t	c	64	0.983	?+	0.3255	0.743182
	Hippocampal_Volume	Longitudinal	rs1240974	18	34650949	DTNA	t	c	64	-0.859	?-	0.3906	0.743182
	Hippocampal_Volume	Longitudinal	rs55869511	18	34651262	DTNA	a	c	64	1.595	?+	0.1108	0.592742
	Hippocampal_Volume	Longitudinal	rs12955208	18	34656737	DTNA	a	g	64	0.965	?+	0.3343	0.743182
	Hippocampal_Volume	Longitudinal	rs72953203	18	34660068	DTNA	a	g	111	-0.868	--	0.3855	0.743182
	Hippocampal_Volume	Longitudinal	rs9946070	18	34665505	DTNA	a	g	111	-1.516	--	0.1295	0.592742
	Hippocampal_Volume	Longitudinal	rs72953211	18	34673381	DTNA	a	c	111	1.861	+-	0.06274	0.592742
	Hippocampal_Volume	Longitudinal	rs55971592	18	34697328	DTNA	a	g	111	-1.208	--	0.2271	0.743182
	Hippocampal_Volume	Longitudinal	rs78837792	18	34703359	DTNA	t	c	64	0.437	?+	0.6623	0.919861
	Hippocampal_Volume	Longitudinal	rs11663468	18	34707936	DTNA	t	c	111	-1.861	-+	0.06274	0.592742
	Hippocampal_Volume	Longitudinal	rs12963825	18	34709484	DTNA	a	g	111	0.23	++	0.8184	0.943905
	Hippocampal_Volume	Longitudinal	rs1480432	18	34727166	DTNA	t	g	111	-2.129	--	0.03324	0.592742
	Hippocampal_Volume	Longitudinal	rs45556134	18	34729425	DTNA	a	g	64	0.699	?+	0.4848	0.789307
	Hippocampal_Volume	Longitudinal	rs17556884	18	34736455	DTNA	t	c	111	0.994	-+	0.3205	0.743182
	Hippocampal_Volume	Longitudinal	rs1480428	18	34738732	DTNA	a	g	111	2.009	++	0.0445	0.592742
	Hippocampal_Volume	Longitudinal	rs12957349	18	34739291	DTNA	t	c	64	0.965	?+	0.3343	0.743182
	Hippocampal_Volume	Longitudinal	rs12608110	18	34752198	DTNA	a	g	111	-0.163	-+	0.8708	0.943905
	Hippocampal_Volume	Longitudinal	rs7228547	18	34760039	DTNA	a	g	111	1.861	+-	0.06274	0.592742
	Hippocampal_Volume	Longitudinal	rs8099437	18	34761448	DTNA	t	g	111	2.009	++	0.0445	0.592742
	Hippocampal_Volume	Longitudinal	rs72955132	18	34762382	DTNA	a	g	111	0.994	-+	0.3205	0.743182
	Hippocampal_Volume	Longitudinal	rs1817452	18	34776629	DTNA	t	c	64	0.965	?+	0.3343	0.743182
	Hippocampal_Volume	Longitudinal	rs56404226	18	34778060	DTNA	a	g	111	0.208	++	0.8353	0.943905
	Hippocampal_Volume	Longitudinal	rs72955175	18	34779045	DTNA	a	t	111	1.544	+-	0.1226	0.592742
	Hippocampal_Volume	Longitudinal	rs12608251	18	34782906	DTNA	t	g	111	-1.265	-+	0.2059	0.714865
	Hippocampal_Volume	Longitudinal	rs76880720	18	34791141	DTNA	a	c	64	-0.965	?-	0.3343	0.743182
	Hippocampal_Volume	Longitudinal	rs9989533	18	34793909	DTNA	t	c	111	-0.637	-+	0.5241	0.789307
	Hippocampal_Volume	Longitudinal	rs79500711	18	34794379	DTNA	a	g	64	-0.437	?-	0.6623	0.919861
	Hippocampal_Volume	Longitudinal	rs138856611	18	34801684	DTNA	t	g	64	0.318	?+	0.7507	0.943905
	Hippocampal_Volume	Longitudinal	rs62097226	18	34804223	DTNA	a	t	47	1.486	+?	0.1374	0.592742
	Hippocampal_Volume	Longitudinal	rs4458079	18	34806161	DTNA	t	c	64	0.65	?+	0.5154	0.789307
	Hippocampal_Volume	Longitudinal	rs8086358	18	34813672	DTNA	t	g	111	-1.544	-+	0.1226	0.592742
	Hippocampal_Volume	Longitudinal	rs72963047	18	34818804	DTNA	a	c	111	0.892	++	0.3724	0.743182
	Hippocampal_Volume	Longitudinal	rs1790533	18	34831631	DTNA	a	g	111	-1.588	-+	0.1122	0.592742
	Hippocampal_Volume	Longitudinal	rs4799782	18	34841123	DTNA	a	g	64	-0.318	?-	0.7507	0.943905
	Hippocampal_Volume	Longitudinal	rs1786604	18	34846264	DTNA	a	g	111	1.544	+-	0.1226	0.592742
	Hippocampal_Volume	Longitudinal	rs644982	18	34869793	DTNA	a	g	111	-1.861	-+	0.06274	0.592742
	Hippocampal_Volume	Longitudinal	rs11659517	18	34870978	DTNA	a	t	64	1.388	?+	0.165	0.625
	Hippocampal_Volume	Longitudinal	rs524969	18	34872102	DTNA	a	t	111	1.661	+-	0.09668	0.592742
	Hippocampal_Volume	Longitudinal	rs637914	18	34876135	DTNA	a	t	111	1.657	+-	0.09758	0.592742
	Hippocampal_Volume	Longitudinal	rs2288085	18	34879740	DTNA	a	g	111	0.137	+-	0.8911	0.943905
	Hippocampal_Volume	Longitudinal	rs17558116	18	34882719	DTNA	t	c	111	-0.415	+-	0.6778	0.931044
	Hippocampal_Volume	Longitudinal	rs10502637	18	34890006	DTNA	t	c	47	0.142	+?	0.8871	0.943905
	Hippocampal_Volume	Longitudinal	rs149163416	18	34898841	DTNA	a	g	111	1.611	++	0.1071	0.592742
	Hippocampal_Volume	Longitudinal	20:33413780	20	33413780	SNTA1	a	t	111	-1.317	--	0.1877	0.670357
	Hippocampal_Volume	Longitudinal	rs291683	20	33431611	SNTA1	t	c	111	1.513	++	0.1304	0.592742
	Hippocampal_Volume	Longitudinal	20:33433270	20	33433270	SNTA1	t	c	111	-1.707	--	0.08786	0.592742
	Hippocampal_Volume	Longitudinal	rs6141396	20	33436147	SNTA1	a	c	47	-1.179	-?	0.2383	0.743182
	PACC	Cross-Sectional	rs111599092	3	49465346	DAG1	a	g	352	-0.768	+-	0.4424	0.85993
	PACC	Cross-Sectional	rs73073015	3	49465733	DAG1	a	g	352	0.794	++	0.4272	0.85993
	PACC	Cross-Sectional	rs7611164	3	49471395	DAG1	t	g	352	1.384	++	0.1663	0.684486
	PACC	Cross-Sectional	rs1568661	3	49483525	DAG1	a	g	352	1.861	++	0.0628	0.601086
	PACC	Cross-Sectional	rs7374731	3	49495661	DAG1	c	g	352	-0.286	--	0.7746	0.957203
	PACC	Cross-Sectional	rs73074811	3	49516098	DAG1	a	t	352	1.407	++	0.1594	0.684486
	PACC	Cross-Sectional	rs3870338	3	49519618	DAG1	a	g	352	1.861	++	0.0628	0.601086
	PACC	Cross-Sectional	rs55935606	3	49528072	DAG1	a	g	352	0.391	++	0.6962	0.957203
	PACC	Cross-Sectional	rs75153130	3	49530436	DAG1	a	c	352	-1.384	--	0.1663	0.684486
	PACC	Cross-Sectional	rs13079082	3	49537375	DAG1	c	g	352	0.473	-+	0.6361	0.957203
	PACC	Cross-Sectional	rs4052546	3	49538116	DAG1	c	g	352	0.286	++	0.7746	0.957203
	PACC	Cross-Sectional	rs73074830	3	49539584	DAG1	a	c	352	0.672	-+	0.5015	0.911998
	PACC	Cross-Sectional	rs114093899	3	49539955	DAG1	c	g	246	-0.924	?-	0.3556	0.85993
	PACC	Cross-Sectional	rs9789109	18	26842291	AQP4	a	g	352	-0.781	--	0.4346	0.85993
	PACC	Cross-Sectional	rs10164026	18	26842362	AQP4	a	c	352	2.132	++	0.03297	0.601086
	PACC	Cross-Sectional	rs4800270	18	26844933	AQP4	t	g	352	-0.649	+-	0.5167	0.911998
	PACC	Cross-Sectional	rs79668602	18	26845488	AQP4	a	g	246	1.651	?+	0.09877	0.601599
	PACC	Cross-Sectional	rs12458416	18	26847267	AQP4	c	g	246	1.67	?+	0.09487	0.601599
	PACC	Cross-Sectional	rs12953446	18	26848521	AQP4	a	g	352	-0.925	--	0.3547	0.85993
	PACC	Cross-Sectional	rs67461489	18	26848876	AQP4	t	c	352	1.515	++	0.1298	0.684486
	PACC	Cross-Sectional	rs11661081	18	26850068	AQP4	a	c	246	0.481	?+	0.6302	0.957203
	PACC	Cross-Sectional	rs3763043	18	26855854	AQP4	t	c	352	-0.57	--	0.5686	0.911998
	PACC	Cross-Sectional	rs68006382	18	26856555	AQP4	a	g	352	-0.267	+-	0.7893	0.957203
	PACC	Cross-Sectional	rs335930	18	26856961	AQP4	a	c	352	0.166	++	0.8679	0.957203
	PACC	Cross-Sectional	rs71353405	18	26857429	AQP4	t	c	246	-1.018	?-	0.3088	0.827384
	PACC	Cross-Sectional	rs162009	18	26864250	AQP4	a	g	352	-1.713	--	0.08679	0.601599
	PACC	Cross-Sectional	rs4800773	18	26865017	AQP4	a	g	352	0.612	++	0.5406	0.911998
	PACC	Cross-Sectional	rs3875089	18	26865469	AQP4	t	c	352	1.237	-+	0.2161	0.691318
	PACC	Cross-Sectional	rs72878787	18	26866517	AQP4	a	g	246	-0.147	?-	0.8832	0.957203
	PACC	Cross-Sectional	rs162006	18	26866570	AQP4	t	c	352	-1.085	--	0.2781	0.792881
	PACC	Cross-Sectional	rs151244	18	26866755	AQP4	t	c	352	-0.158	-+	0.8741	0.957203
	PACC	Cross-Sectional	rs72878794	18	26866839	AQP4	t	c	352	-0.781	+-	0.4347	0.85993
	PACC	Cross-Sectional	rs9961118	18	26866901	AQP4	t	c	106	-0.698	-?	0.485	0.902639
	PACC	Cross-Sectional	rs162004	18	26867972	AQP4	c	g	352	0.776	++	0.4379	0.85993
	PACC	Cross-Sectional	rs72878799	18	26868165	AQP4	a	g	352	-0.052	-+	0.9589	0.981424
	PACC	Cross-Sectional	rs11662318	18	26869056	AQP4	t	c	352	-1.005	--	0.3149	0.827384
	PACC	Cross-Sectional	rs151246	18	26869139	AQP4	t	g	352	0.901	++	0.3675	0.85993
	PACC	Cross-Sectional	rs491148	18	26869803	AQP4	a	g	352	0.869	++	0.3851	0.85993
	PACC	Cross-Sectional	rs162002	18	26871015	AQP4	a	g	352	0.842	-+	0.3997	0.85993
	PACC	Cross-Sectional	rs162001	18	26871481	AQP4	a	c	352	-0.032	+-	0.9741	0.981424
	PACC	Cross-Sectional	rs3865411	18	26871684	AQP4	a	g	352	-0.897	+-	0.3695	0.85993
	PACC	Cross-Sectional	rs162000	18	26872471	AQP4	a	c	352	-0.479	-+	0.6317	0.957203
	PACC	Cross-Sectional	rs12969503	18	26873564	AQP4	t	g	352	-0.613	--	0.5397	0.911998
	PACC	Cross-Sectional	rs8094228	18	26873767	AQP4	t	c	352	1.26	++	0.2075	0.691318
	PACC	Cross-Sectional	rs480647	18	26874290	AQP4	t	c	352	-3.323	--	0.0008905	0.119327
	PACC	Cross-Sectional	rs10502478	18	26874616	AQP4	a	c	352	-0.313	--	0.7539	0.957203
	PACC	Cross-Sectional	rs7234562	18	34483685	DTNA	t	c	352	0.373	-+	0.7093	0.957203
	PACC	Cross-Sectional	rs79922046	18	34485536	DTNA	a	g	352	0.83	-+	0.4067	0.85993
	PACC	Cross-Sectional	rs9955950	18	34485672	DTNA	t	c	352	-0.767	--	0.4428	0.85993
	PACC	Cross-Sectional	rs12957028	18	34485948	DTNA	a	g	352	0.217	+-	0.8284	0.957203
	PACC	Cross-Sectional	rs72639491	18	34491438	DTNA	a	g	352	0.583	++	0.5599	0.911998
	PACC	Cross-Sectional	rs62097347	18	34492032	DTNA	c	g	352	0.375	++	0.7073	0.957203
	PACC	Cross-Sectional	rs9961251	18	34492344	DTNA	t	c	352	1.063	++	0.2879	0.803721
	PACC	Cross-Sectional	rs111846993	18	34494001	DTNA	t	c	352	-0.014	-+	0.9885	0.9885
	PACC	Cross-Sectional	rs4799769	18	34494577	DTNA	c	g	352	-0.229	-+	0.8189	0.957203
	PACC	Cross-Sectional	rs8092794	18	34496273	DTNA	a	g	352	-0.438	+-	0.6615	0.957203
	PACC	Cross-Sectional	rs7243528	18	34497055	DTNA	t	c	246	1.967	?+	0.04915	0.601086
	PACC	Cross-Sectional	rs79972565	18	34497194	DTNA	t	g	246	2.261	?+	0.02376	0.601086
	PACC	Cross-Sectional	rs35839923	18	34497764	DTNA	a	g	352	1.222	-+	0.2217	0.691318
	PACC	Cross-Sectional	rs62097349	18	34499519	DTNA	a	g	352	1.867	++	0.06192	0.601086
	PACC	Cross-Sectional	rs9965622	18	34502153	DTNA	t	c	352	0.769	+-	0.4421	0.85993
	PACC	Cross-Sectional	rs62098462	18	34504364	DTNA	t	c	246	0.279	?+	0.78	0.957203
	PACC	Cross-Sectional	rs75127284	18	34506592	DTNA	a	c	246	-1.314	?-	0.189	0.684486
	PACC	Cross-Sectional	rs2439861	18	34507940	DTNA	a	g	246	1.359	?+	0.1743	0.684486
	PACC	Cross-Sectional	rs2509597	18	34528430	DTNA	a	t	352	-1.316	--	0.188	0.684486
	PACC	Cross-Sectional	rs71363449	18	34531997	DTNA	t	c	246	1.67	?+	0.09484	0.601599
	PACC	Cross-Sectional	rs2439853	18	34533937	DTNA	a	g	352	-0.252	-+	0.8013	0.957203
	PACC	Cross-Sectional	rs2439000	18	34536414	DTNA	c	g	246	1.967	?+	0.04915	0.601086
	PACC	Cross-Sectional	rs1967583	18	34544573	DTNA	t	c	352	-0.252	+-	0.8008	0.957203
	PACC	Cross-Sectional	rs28856895	18	34555507	DTNA	a	g	352	0.771	++	0.4408	0.85993
	PACC	Cross-Sectional	rs77973497	18	34560529	DTNA	a	c	246	-0.152	?-	0.8793	0.957203
	PACC	Cross-Sectional	rs2579796	18	34569243	DTNA	a	g	352	-0.271	-+	0.7861	0.957203
	PACC	Cross-Sectional	rs2579797	18	34571732	DTNA	t	g	246	-2.192	?-	0.02839	0.601086
	PACC	Cross-Sectional	rs2685557	18	34576782	DTNA	t	c	352	-0.271	-+	0.7861	0.957203
	PACC	Cross-Sectional	rs9958492	18	34577783	DTNA	t	c	246	1.67	?+	0.09484	0.601599
	PACC	Cross-Sectional	rs2579802	18	34579787	DTNA	a	c	246	-1.937	?-	0.05274	0.601086
	PACC	Cross-Sectional	rs74920018	18	34607557	DTNA	a	t	246	-0.152	?-	0.8793	0.957203
	PACC	Cross-Sectional	rs1439127	18	34607759	DTNA	a	t	352	-0.814	-+	0.4158	0.85993
	PACC	Cross-Sectional	rs12327368	18	34611361	DTNA	a	g	246	1.67	?+	0.09484	0.601599
	PACC	Cross-Sectional	rs62097188	18	34611412	DTNA	a	g	246	-0.138	?-	0.8903	0.957203
	PACC	Cross-Sectional	rs9807153	18	34635520	DTNA	a	t	352	-0.205	-+	0.8377	0.957203
	PACC	Cross-Sectional	rs2730126	18	34635939	DTNA	a	c	352	-1.444	-+	0.1487	0.684486
	PACC	Cross-Sectional	rs1659526	18	34644451	DTNA	a	g	246	-2.262	?-	0.02367	0.601086
	PACC	Cross-Sectional	rs17642885	18	34649976	DTNA	t	c	352	-0.408	--	0.6834	0.957203
	PACC	Cross-Sectional	rs1240974	18	34650949	DTNA	t	c	246	-2.261	?-	0.02376	0.601086
	PACC	Cross-Sectional	rs55869511	18	34651262	DTNA	a	c	246	-2.127	?-	0.03338	0.601086
	PACC	Cross-Sectional	rs12955208	18	34656737	DTNA	a	g	352	1.28	-+	0.2006	0.689241
	PACC	Cross-Sectional	rs72953203	18	34660068	DTNA	a	g	352	0.278	++	0.7807	0.957203
	PACC	Cross-Sectional	rs9946070	18	34665505	DTNA	a	g	352	-0.409	--	0.6826	0.957203
	PACC	Cross-Sectional	rs72953211	18	34673381	DTNA	a	c	352	1.208	-+	0.227	0.691318
	PACC	Cross-Sectional	rs55971592	18	34697328	DTNA	a	g	352	0.158	++	0.8748	0.957203
	PACC	Cross-Sectional	rs78837792	18	34703359	DTNA	t	c	352	-1.792	--	0.07311	0.601599
	PACC	Cross-Sectional	rs11663468	18	34707936	DTNA	t	c	352	-1.21	+-	0.2261	0.691318
	PACC	Cross-Sectional	rs12963825	18	34709484	DTNA	a	g	352	0.711	-+	0.4771	0.900442
	PACC	Cross-Sectional	rs1480432	18	34727166	DTNA	t	g	352	0.667	++	0.5048	0.911998
	PACC	Cross-Sectional	rs45556134	18	34729425	DTNA	a	g	246	0.051	?+	0.9595	0.981424
	PACC	Cross-Sectional	rs17556884	18	34736455	DTNA	t	c	352	-0.566	+-	0.5717	0.911998
	PACC	Cross-Sectional	rs1480428	18	34738732	DTNA	a	g	352	0.045	+-	0.9643	0.981424
	PACC	Cross-Sectional	rs12957349	18	34739291	DTNA	t	c	352	1.28	-+	0.2006	0.689241
	PACC	Cross-Sectional	rs12608110	18	34752198	DTNA	a	g	352	0.859	-+	0.3903	0.85993
	PACC	Cross-Sectional	rs7228547	18	34760039	DTNA	a	g	352	1.578	-+	0.1146	0.648225
	PACC	Cross-Sectional	rs8099437	18	34761448	DTNA	t	g	352	0.244	+-	0.8069	0.957203
	PACC	Cross-Sectional	rs72955132	18	34762382	DTNA	a	g	352	-0.566	+-	0.5717	0.911998
	PACC	Cross-Sectional	rs1817452	18	34776629	DTNA	t	c	352	0.039	-+	0.9692	0.981424
	PACC	Cross-Sectional	rs56404226	18	34778060	DTNA	a	g	352	-1.097	+-	0.2728	0.792881
	PACC	Cross-Sectional	rs72955175	18	34779045	DTNA	a	t	352	0.399	-+	0.6897	0.957203
	PACC	Cross-Sectional	rs12608251	18	34782906	DTNA	t	g	352	-0.201	+-	0.841	0.957203
	PACC	Cross-Sectional	rs76880720	18	34791141	DTNA	a	c	352	-0.744	+-	0.4567	0.874254
	PACC	Cross-Sectional	rs9989533	18	34793909	DTNA	t	c	352	1.352	-+	0.1763	0.684486
	PACC	Cross-Sectional	rs79500711	18	34794379	DTNA	a	g	352	1.031	++	0.3025	0.827245
	PACC	Cross-Sectional	rs138856611	18	34801684	DTNA	t	g	246	0.117	?+	0.9072	0.957203
	PACC	Cross-Sectional	rs62097226	18	34804223	DTNA	a	t	106	-0.077	-?	0.9387	0.981424
	PACC	Cross-Sectional	rs4458079	18	34806161	DTNA	t	c	246	-0.385	?-	0.7005	0.957203
	PACC	Cross-Sectional	rs8086358	18	34813672	DTNA	t	g	352	-0.399	+-	0.6897	0.957203
	PACC	Cross-Sectional	rs72963047	18	34818804	DTNA	a	c	352	-1.484	--	0.1378	0.684486
	PACC	Cross-Sectional	rs17557660	18	34831178	DTNA	a	t	106	1.334	+?	0.1822	0.684486
	PACC	Cross-Sectional	rs1790533	18	34831631	DTNA	a	g	352	-0.134	+-	0.8936	0.957203
	PACC	Cross-Sectional	rs4799782	18	34841123	DTNA	a	g	246	-0.117	?-	0.9072	0.957203
	PACC	Cross-Sectional	rs1786604	18	34846264	DTNA	a	g	352	0.399	-+	0.6897	0.957203
	PACC	Cross-Sectional	rs7233779	18	34863262	DTNA	a	g	352	-1.571	--	0.1161	0.648225
	PACC	Cross-Sectional	rs644982	18	34869793	DTNA	a	g	352	-0.62	+-	0.5352	0.911998
	PACC	Cross-Sectional	rs11659517	18	34870978	DTNA	a	t	352	-0.259	--	0.796	0.957203
	PACC	Cross-Sectional	rs524969	18	34872102	DTNA	a	t	352	0.639	-+	0.5228	0.911998
	PACC	Cross-Sectional	rs637914	18	34876135	DTNA	a	t	352	1.136	-+	0.2558	0.761716
	PACC	Cross-Sectional	rs9304141	18	34879143	DTNA	t	c	352	0.8	++	0.4235	0.85993
	PACC	Cross-Sectional	rs2288085	18	34879740	DTNA	a	g	352	1.333	++	0.1824	0.684486
	PACC	Cross-Sectional	rs17558116	18	34882719	DTNA	t	c	352	0.448	-+	0.6539	0.957203
	PACC	Cross-Sectional	rs10502637	18	34890006	DTNA	t	c	352	0.141	+-	0.8879	0.957203
	PACC	Cross-Sectional	rs149163416	18	34898841	DTNA	a	g	352	-1.903	--	0.05709	0.601086
	PACC	Cross-Sectional	20:33413780	20	33413780	SNTA1	a	t	352	-0.315	--	0.7527	0.957203
	PACC	Cross-Sectional	rs291683	20	33431611	SNTA1	t	c	352	0.402	-+	0.6876	0.957203
	PACC	Cross-Sectional	20:33433270	20	33433270	SNTA1	t	c	352	0.577	+-	0.5638	0.911998
	PACC	Cross-Sectional	rs6141396	20	33436147	SNTA1	a	c	106	1.765	+?	0.07764	0.601599
	PACC	Cross-Sectional	rs293721	20	33441633	SNTA1	t	c	106	-1.359	-?	0.1741	0.684486
	PACC	Longitudinal	rs111599092	3	49465346	DAG1	a	g	265	-3.431	--	0.0006015	0.080601
	PACC	Longitudinal	rs73073015	3	49465733	DAG1	a	g	265	-1.526	--	0.1271	0.759139
	PACC	Longitudinal	rs7611164	3	49471395	DAG1	t	g	194	0.339	?+	0.7346	0.964378
	PACC	Longitudinal	rs1568661	3	49483525	DAG1	a	g	265	-0.925	+-	0.3552	0.893519
	PACC	Longitudinal	rs7374731	3	49495661	DAG1	c	g	265	-0.204	--	0.8385	0.964378
	PACC	Longitudinal	rs73074811	3	49516098	DAG1	a	t	265	0.439	-+	0.661	0.943388
	PACC	Longitudinal	rs3870338	3	49519618	DAG1	a	g	265	-0.925	+-	0.3552	0.893519
	PACC	Longitudinal	rs55935606	3	49528072	DAG1	a	g	265	0.137	++	0.8909	0.964378
	PACC	Longitudinal	rs75153130	3	49530436	DAG1	a	c	194	-0.339	?-	0.7346	0.964378
	PACC	Longitudinal	rs13079082	3	49537375	DAG1	c	g	265	1.64	++	0.1011	0.68139
	PACC	Longitudinal	rs4052546	3	49538116	DAG1	c	g	265	0.204	++	0.8385	0.964378
	PACC	Longitudinal	rs73074830	3	49539584	DAG1	a	c	265	2.299	++	0.02153	0.320558
	PACC	Longitudinal	rs114093899	3	49539955	DAG1	c	g	194	-0.163	?-	0.8709	0.964378
	PACC	Longitudinal	rs9789109	18	26842291	AQP4	a	g	265	0.719	-+	0.472	0.893519
	PACC	Longitudinal	rs10164026	18	26842362	AQP4	a	c	194	0.839	?+	0.4012	0.893519
	PACC	Longitudinal	rs4800270	18	26844933	AQP4	t	g	265	-0.02	-+	0.9839	0.9977
	PACC	Longitudinal	rs79668602	18	26845488	AQP4	a	g	194	0.315	?+	0.7527	0.964378
	PACC	Longitudinal	rs12458416	18	26847267	AQP4	c	g	194	0.208	?+	0.8349	0.964378
	PACC	Longitudinal	rs12953446	18	26848521	AQP4	a	g	265	1.451	++	0.1469	0.776388
	PACC	Longitudinal	rs67461489	18	26848876	AQP4	t	c	265	-0.75	+-	0.4532	0.893519
	PACC	Longitudinal	rs11661081	18	26850068	AQP4	a	c	194	-0.204	?-	0.8383	0.964378
	PACC	Longitudinal	rs3763043	18	26855854	AQP4	t	c	265	0.525	+-	0.5996	0.924905
	PACC	Longitudinal	rs68006382	18	26856555	AQP4	a	g	265	-0.911	--	0.3623	0.893519
	PACC	Longitudinal	rs335930	18	26856961	AQP4	a	c	265	-0.218	+-	0.8273	0.964378
	PACC	Longitudinal	rs71353405	18	26857429	AQP4	t	c	194	0.061	?+	0.9516	0.988484
	PACC	Longitudinal	rs162009	18	26864250	AQP4	a	g	265	1.336	-+	0.1815	0.776388
	PACC	Longitudinal	rs4800773	18	26865017	AQP4	a	g	265	1.201	++	0.2299	0.831505
	PACC	Longitudinal	rs3875089	18	26865469	AQP4	t	c	265	-0.948	+-	0.3431	0.893519
	PACC	Longitudinal	rs72878787	18	26866517	AQP4	a	g	194	-0.123	?-	0.9021	0.964378
	PACC	Longitudinal	rs162006	18	26866570	AQP4	t	c	265	0.186	-+	0.8527	0.964378
	PACC	Longitudinal	rs151244	18	26866755	AQP4	t	c	265	-0.121	+-	0.9038	0.964378
	PACC	Longitudinal	rs72878794	18	26866839	AQP4	t	c	265	-0.011	-+	0.9915	0.9977
	PACC	Longitudinal	rs9961118	18	26866901	AQP4	t	c	71	0.113	+?	0.9103	0.964378
	PACC	Longitudinal	rs162004	18	26867972	AQP4	c	g	265	0.01	-+	0.992	0.9977
	PACC	Longitudinal	rs72878799	18	26868165	AQP4	a	g	265	0.142	+-	0.8872	0.964378
	PACC	Longitudinal	rs11662318	18	26869056	AQP4	t	c	265	-0.333	-+	0.7389	0.964378
	PACC	Longitudinal	rs151246	18	26869139	AQP4	t	g	265	0.586	++	0.5578	0.902426
	PACC	Longitudinal	rs491148	18	26869803	AQP4	a	g	265	-0.029	+-	0.9767	0.9977
	PACC	Longitudinal	rs162002	18	26871015	AQP4	a	g	265	-1.196	+-	0.2315	0.831505
	PACC	Longitudinal	rs162001	18	26871481	AQP4	a	c	265	0.893	++	0.3717	0.893519
	PACC	Longitudinal	rs3865411	18	26871684	AQP4	a	g	265	-1.324	+-	0.1857	0.776388
	PACC	Longitudinal	rs162000	18	26872471	AQP4	a	c	265	-0.422	+-	0.6733	0.943388
	PACC	Longitudinal	rs12969503	18	26873564	AQP4	t	g	265	-1.637	--	0.1017	0.68139
	PACC	Longitudinal	rs8094228	18	26873767	AQP4	t	c	265	0.584	-+	0.5591	0.902426
	PACC	Longitudinal	rs480647	18	26874290	AQP4	t	c	265	-1.345	--	0.1785	0.776388
	PACC	Longitudinal	rs10502478	18	26874616	AQP4	a	c	265	0.965	++	0.3346	0.893519
	PACC	Longitudinal	rs7234562	18	34483685	DTNA	t	c	265	-0.87	--	0.3842	0.893519
	PACC	Longitudinal	rs79922046	18	34485536	DTNA	a	g	194	-0.599	?-	0.5491	0.902426
	PACC	Longitudinal	rs9955950	18	34485672	DTNA	t	c	265	1.288	++	0.1979	0.779959
	PACC	Longitudinal	rs12957028	18	34485948	DTNA	a	g	194	0.415	?+	0.6778	0.943388
	PACC	Longitudinal	rs72639491	18	34491438	DTNA	a	g	265	-0.597	--	0.5502	0.902426
	PACC	Longitudinal	rs62097347	18	34492032	DTNA	c	g	265	-1.009	--	0.3129	0.893519
	PACC	Longitudinal	rs9961251	18	34492344	DTNA	t	c	265	-1.186	--	0.2358	0.831505
	PACC	Longitudinal	rs111846993	18	34494001	DTNA	t	c	265	0.257	++	0.7972	0.964378
	PACC	Longitudinal	rs4799769	18	34494577	DTNA	c	g	265	0.108	+-	0.914	0.964378
	PACC	Longitudinal	rs8092794	18	34496273	DTNA	a	g	265	0.108	++	0.914	0.964378
	PACC	Longitudinal	rs7243528	18	34497055	DTNA	t	c	194	-0.966	?-	0.3341	0.893519
	PACC	Longitudinal	rs79972565	18	34497194	DTNA	t	g	194	-0.767	?-	0.4432	0.893519
	PACC	Longitudinal	rs35839923	18	34497764	DTNA	a	g	265	-0.734	+-	0.4628	0.893519
	PACC	Longitudinal	rs62097349	18	34499519	DTNA	a	g	265	-0.278	--	0.7813	0.964378
	PACC	Longitudinal	rs9965622	18	34502153	DTNA	t	c	265	-0.733	--	0.4635	0.893519
	PACC	Longitudinal	rs62098462	18	34504364	DTNA	t	c	194	-0.83	?-	0.4067	0.893519
	PACC	Longitudinal	rs75127284	18	34506592	DTNA	a	c	194	2.333	?+	0.01963	0.320558
	PACC	Longitudinal	rs2439861	18	34507940	DTNA	a	g	194	-2.333	?-	0.01963	0.320558
	PACC	Longitudinal	rs2509597	18	34528430	DTNA	a	t	265	-0.609	+-	0.5426	0.902426
	PACC	Longitudinal	rs71363449	18	34531997	DTNA	t	c	194	-1.356	?-	0.175	0.776388
	PACC	Longitudinal	rs2439853	18	34533937	DTNA	a	g	194	0.078	?+	0.9379	0.981864
	PACC	Longitudinal	rs2439000	18	34536414	DTNA	c	g	194	-0.966	?-	0.3341	0.893519
	PACC	Longitudinal	rs1967583	18	34544573	DTNA	t	c	265	2.615	++	0.008934	0.239431
	PACC	Longitudinal	rs28856895	18	34555507	DTNA	a	g	265	-0.136	+-	0.8915	0.964378
	PACC	Longitudinal	rs77973497	18	34560529	DTNA	a	c	194	-0.409	?-	0.6829	0.943388
	PACC	Longitudinal	rs2579796	18	34569243	DTNA	a	g	194	-0.168	?-	0.8666	0.964378
	PACC	Longitudinal	rs2579797	18	34571732	DTNA	t	g	194	0.767	?+	0.4432	0.893519
	PACC	Longitudinal	rs2685557	18	34576782	DTNA	t	c	194	-0.168	?-	0.8666	0.964378
	PACC	Longitudinal	rs9958492	18	34577783	DTNA	t	c	194	-1.356	?-	0.175	0.776388
	PACC	Longitudinal	rs2579802	18	34579787	DTNA	a	c	194	0.464	?+	0.6427	0.943388
	PACC	Longitudinal	rs74920018	18	34607557	DTNA	a	t	194	-0.409	?-	0.6829	0.943388
	PACC	Longitudinal	rs1439127	18	34607759	DTNA	a	t	265	0.968	++	0.3329	0.893519
	PACC	Longitudinal	rs12327368	18	34611361	DTNA	a	g	194	-1.356	?-	0.175	0.776388
	PACC	Longitudinal	rs62097188	18	34611412	DTNA	a	g	194	-0.003	?-	0.9977	0.9977
	PACC	Longitudinal	rs9807153	18	34635520	DTNA	a	t	265	0.427	+-	0.6695	0.943388
	PACC	Longitudinal	rs2730126	18	34635939	DTNA	a	c	194	-0.683	?-	0.4944	0.902426
	PACC	Longitudinal	rs1659526	18	34644451	DTNA	a	g	194	0.579	?+	0.5628	0.902426
	PACC	Longitudinal	rs17642885	18	34649976	DTNA	t	c	265	-0.563	--	0.5737	0.904421
	PACC	Longitudinal	rs1240974	18	34650949	DTNA	t	c	194	0.767	?+	0.4432	0.893519
	PACC	Longitudinal	rs55869511	18	34651262	DTNA	a	c	194	1.645	?+	0.09999	0.68139
	PACC	Longitudinal	rs12955208	18	34656737	DTNA	a	g	265	-1.939	--	0.05251	0.541257
	PACC	Longitudinal	rs72953203	18	34660068	DTNA	a	g	265	-0.818	--	0.4133	0.893519
	PACC	Longitudinal	rs9946070	18	34665505	DTNA	a	g	265	0.19	+-	0.8491	0.964378
	PACC	Longitudinal	rs72953211	18	34673381	DTNA	a	c	265	-1.019	--	0.3083	0.893519
	PACC	Longitudinal	rs55971592	18	34697328	DTNA	a	g	265	0.192	++	0.8477	0.964378
	PACC	Longitudinal	rs78837792	18	34703359	DTNA	t	c	265	0.982	++	0.326	0.893519
	PACC	Longitudinal	rs11663468	18	34707936	DTNA	t	c	265	0.475	++	0.6345	0.943388
	PACC	Longitudinal	rs12963825	18	34709484	DTNA	a	g	265	-1.594	--	0.111	0.708286
	PACC	Longitudinal	rs1480432	18	34727166	DTNA	t	g	265	0.219	-+	0.8266	0.964378
	PACC	Longitudinal	rs45556134	18	34729425	DTNA	a	g	194	-1.224	?-	0.221	0.831505
	PACC	Longitudinal	rs17556884	18	34736455	DTNA	t	c	265	1.405	++	0.1601	0.776388
	PACC	Longitudinal	rs1480428	18	34738732	DTNA	a	g	265	0.622	-+	0.5343	0.902426
	PACC	Longitudinal	rs12957349	18	34739291	DTNA	t	c	265	-1.939	--	0.05251	0.541257
	PACC	Longitudinal	rs12608110	18	34752198	DTNA	a	g	265	-0.712	+-	0.4763	0.893519
	PACC	Longitudinal	rs7228547	18	34760039	DTNA	a	g	265	-1.158	--	0.247	0.83817
	PACC	Longitudinal	rs8099437	18	34761448	DTNA	t	g	265	0.308	-+	0.7581	0.964378
	PACC	Longitudinal	rs72955132	18	34762382	DTNA	a	g	265	1.405	++	0.1601	0.776388
	PACC	Longitudinal	rs1817452	18	34776629	DTNA	t	c	265	-1.092	--	0.2749	0.893519
	PACC	Longitudinal	rs56404226	18	34778060	DTNA	a	g	265	0.891	-+	0.3732	0.893519
	PACC	Longitudinal	rs72955175	18	34779045	DTNA	a	t	265	-1.707	--	0.08791	0.68139
	PACC	Longitudinal	rs12608251	18	34782906	DTNA	t	g	265	2.129	-+	0.03323	0.445282
	PACC	Longitudinal	rs76880720	18	34791141	DTNA	a	c	265	0.776	++	0.4378	0.893519
	PACC	Longitudinal	rs9989533	18	34793909	DTNA	t	c	265	-0.793	--	0.4275	0.893519
	PACC	Longitudinal	rs79500711	18	34794379	DTNA	a	g	265	-0.326	--	0.7441	0.964378
	PACC	Longitudinal	rs138856611	18	34801684	DTNA	t	g	194	-0.514	?-	0.6074	0.924905
	PACC	Longitudinal	rs62097226	18	34804223	DTNA	a	t	71	-0.366	-?	0.7142	0.964378
	PACC	Longitudinal	rs4458079	18	34806161	DTNA	t	c	194	1.513	?+	0.1303	0.759139
	PACC	Longitudinal	rs8086358	18	34813672	DTNA	t	g	265	1.707	++	0.08791	0.68139
	PACC	Longitudinal	rs72963047	18	34818804	DTNA	a	c	265	0.818	++	0.4134	0.893519
	PACC	Longitudinal	rs17557660	18	34831178	DTNA	a	t	71	-0.473	-?	0.6361	0.943388
	PACC	Longitudinal	rs1790533	18	34831631	DTNA	a	g	265	2.672	-+	0.007546	0.239431
	PACC	Longitudinal	rs4799782	18	34841123	DTNA	a	g	194	0.514	?+	0.6074	0.924905
	PACC	Longitudinal	rs1786604	18	34846264	DTNA	a	g	265	-1.707	--	0.08791	0.68139
	PACC	Longitudinal	rs7233779	18	34863262	DTNA	a	g	265	0.596	++	0.5515	0.902426
	PACC	Longitudinal	rs644982	18	34869793	DTNA	a	g	265	0.716	++	0.4739	0.893519
	PACC	Longitudinal	rs11659517	18	34870978	DTNA	a	t	265	0.574	-+	0.5657	0.902426
	PACC	Longitudinal	rs524969	18	34872102	DTNA	a	t	265	-1.866	+-	0.062	0.593429
	PACC	Longitudinal	rs637914	18	34876135	DTNA	a	t	265	-2.326	+-	0.02001	0.320558
	PACC	Longitudinal	rs9304141	18	34879143	DTNA	t	c	265	3.001	-+	0.002689	0.122923
	PACC	Longitudinal	rs2288085	18	34879740	DTNA	a	g	265	1.975	-+	0.04832	0.541257
[truncated: 526 more rows]

## Sheet: Table S10
Supplementary Table 10: G-GRS Aβ- participants
[truncated: 37 more rows]
